# Supplementary material for: Transcriptome-derived networks reconstruct distinct immune strategies under different iron availability between Arabidopsis and rice
Source: Research Square preprint supplement (doi:10.21203/rs.3.rs-3214423/v1), 2024-07-15
Supplement: Supplementary file 1 [file 1d99de6689d023eedb792b75.xlsx]

## Sheet: -Fe
Gene ID	Base mean	log2 FC	SE	Statistic	P	adjusted P
AT4G30650	2418.08	1.91356	0.17538	10.911	1.02158e-27	2.06789e-23
AT1G65845	131.097	-2.96211	0.304204	-9.73725	2.09142e-22	2.11673e-18
AT1G22690	655.523	-2.40305	0.271936	-8.83683	9.84767e-19	6.64455e-15
AT4G02520	9054.67	-3.017	0.346448	-8.70836	3.08315e-18	1.56023e-14
AT1G68050	82.2296	3.12191	0.388296	8.04004	8.98075e-16	3.0298e-12
AT1G64890	358.776	1.10619	0.139879	7.90824	2.61061e-15	6.60548e-12
AT5G55930	752.221	-2.68712	0.356991	-7.52714	5.18632e-14	1.16646e-10
AT5G24110	38.9632	-4.98762	0.671507	-7.42749	1.10678e-13	2.24034e-10
AT1G79460	710.908	1.09391	0.148698	7.35655	1.88726e-13	3.4729e-10
AT3G16670	1722.96	-2.66554	0.368675	-7.23007	4.82762e-13	6.98004e-10
AT4G39250	56.1565	-9.34031	1.31363	-7.1103	1.1579e-12	1.46489e-09
AT4G16146	396.658	1.98769	0.281707	7.05589	1.71495e-12	1.92856e-09
AT2G21650	402.173	-4.8397	0.687117	-7.04348	1.87495e-12	1.99751e-09
AT1G21050	257.884	-1.71626	0.246749	-6.95548	3.51367e-12	3.4489e-09
AT3G18280	420.081	1.10969	0.160417	6.91753	4.59576e-12	4.22852e-09
AT1G68440	434.475	-1.60838	0.233086	-6.90035	5.18733e-12	4.5653e-09
AT1G62380	5856.91	-1.10785	0.160969	-6.88238	5.88607e-12	4.96441e-09
AT3G16530	3265.13	-5.11543	0.744604	-6.87	6.42006e-12	5.1982e-09
AT1G14200	225.932	-1.3326	0.194953	-6.83553	8.17048e-12	6.36104e-09
AT5G48540	243.001	-2.45861	0.361987	-6.79198	1.10604e-11	8.29203e-09
AT2G02010	122.545	-2.24043	0.330793	-6.77288	1.26241e-11	9.1263e-09
AT4G30910	396.242	-1.05135	0.155857	-6.74564	1.52355e-11	1.06344e-08
AT3G27250	446.637	2.7697	0.412717	6.71088	1.9345e-11	1.30527e-08
AT3G62150	672.597	-2.55388	0.387632	-6.58841	4.44555e-11	2.81209e-08
AT3G50970	254.479	3.22545	0.493421	6.5369	6.28049e-11	3.73911e-08
AT3G63310	880.667	-1.06627	0.163079	-6.53836	6.21977e-11	3.73911e-08
AT1G23090	495.353	-1.92494	0.294897	-6.52751	6.68698e-11	3.86737e-08
AT5G64120	367.577	-3.04626	0.478147	-6.37098	1.87827e-10	1.02757e-07
AT4G35770	1146.26	-4.06434	0.639006	-6.36041	2.01219e-10	1.07186e-07
AT3G02380	557	-1.11974	0.177755	-6.29936	2.98886e-10	1.51251e-07
AT1G76990	3593.1	-1.58049	0.252477	-6.25991	3.85198e-10	1.85882e-07
AT2G38310	825.664	-2.43587	0.389312	-6.25685	3.9284e-10	1.85882e-07
AT3G24500	264.212	-1.35477	0.216554	-6.25604	3.94867e-10	1.85882e-07
AT5G37600	3830.81	-1.6898	0.271027	-6.23482	4.52304e-10	2.0808e-07
AT1G02920	1840.55	-3.95382	0.635656	-6.22005	4.96982e-10	2.23554e-07
AT5G25110	192.85	1.85414	0.300495	6.17029	6.81641e-10	2.99952e-07
AT1G04620	277.378	1.12309	0.18383	6.10936	1.00032e-09	4.21844e-07
AT2G41190	442.004	1.92646	0.317374	6.06999	1.27921e-09	5.17875e-07
AT5G15960	109.024	3.4007	0.561898	6.05218	1.429e-09	5.67171e-07
AT3G16150	41.4645	-3.95055	0.656581	-6.01685	1.77845e-09	6.79234e-07
AT3G22060	449.651	-2.07708	0.347091	-5.98423	2.17412e-09	8.00154e-07
AT5G07990	181.612	2.41333	0.403154	5.98613	2.14893e-09	8.00154e-07
AT4G23570	1008.6	-1.08753	0.183111	-5.93917	2.86475e-09	1.01734e-06
AT1G48330	152.836	1.50788	0.255841	5.89385	3.77307e-09	1.3168e-06
AT3G16660	656.54	-1.71603	0.291716	-5.88254	4.0402e-09	1.38613e-06
AT4G23200	133.645	-1.85635	0.315944	-5.87557	4.21385e-09	1.41542e-06
AT2G39210	447.365	-1.6911	0.288521	-5.86126	4.5938e-09	1.476e-06
AT4G33550	210.063	3.37791	0.578409	5.84001	5.21974e-09	1.60326e-06
AT1G12940	42.1324	-5.24827	0.901195	-5.82368	5.75664e-09	1.71362e-06
AT1G21110	99.7662	-3.62147	0.621766	-5.82449	5.72883e-09	1.71362e-06
AT4G27300	2387.19	-1.79979	0.310328	-5.79964	6.64559e-09	1.94957e-06
AT5G17460	425.917	2.28021	0.395033	5.77221	7.82405e-09	2.26249e-06
AT4G19430	212.053	-3.02675	0.525219	-5.76284	8.27123e-09	2.35812e-06
AT3G05660	528.336	1.35205	0.234825	5.75769	8.52718e-09	2.39732e-06
AT2G19190	79.4195	-4.41828	0.771111	-5.72976	1.00572e-08	2.75105e-06
AT1G27020	752.683	-4.60461	0.806004	-5.71289	1.11073e-08	2.90542e-06
AT4G36010	257.983	1.7988	0.314613	5.71751	1.08098e-08	2.90542e-06
AT3G15356	1660.72	-3.67374	0.64652	-5.68234	1.32863e-08	3.40433e-06
AT5G05440	176.397	-2.70492	0.476922	-5.67163	1.41446e-08	3.57893e-06
AT2G02930	30.5713	-3.65332	0.650638	-5.61498	1.96587e-08	4.73729e-06
AT2G40670	62.2514	1.96775	0.351273	5.60177	2.1217e-08	5.05265e-06
AT4G04570	1366.42	-1.32953	0.237478	-5.59854	2.16165e-08	5.08792e-06
AT3G05640	459.047	2.18718	0.391032	5.59336	2.22721e-08	5.08952e-06
AT1G20030	237.608	1.83879	0.329596	5.57893	2.42008e-08	5.44303e-06
AT4G36410	97.3297	-3.21741	0.577658	-5.56974	2.55113e-08	5.67472e-06
AT1G19380	107.423	-2.2957	0.413718	-5.54894	2.87399e-08	6.3234e-06
AT1G64110	63.5638	4.61533	0.832123	5.54645	2.91522e-08	6.34516e-06
AT1G75040	459.96	-2.02102	0.367366	-5.50138	3.76836e-08	8.02937e-06
AT2G29720	216.841	-1.6423	0.299746	-5.47896	4.27827e-08	9.0209e-06
AT1G12110	2170.96	-1.05835	0.193804	-5.46092	4.73677e-08	9.88472e-06
AT5G61160	303.118	-7.74825	1.43023	-5.41748	6.04458e-08	1.2359e-05
AT4G19370	48.3452	-2.32996	0.433897	-5.36983	7.88099e-08	1.56399e-05
AT3G10985	960.802	-1.10351	0.206752	-5.33736	9.43073e-08	1.81806e-05
AT3G16770	2766.64	-1.50457	0.282108	-5.33331	9.64402e-08	1.84164e-05
AT2G16990	341.796	1.5368	0.290519	5.28985	1.22416e-07	2.23239e-05
AT5G46830	151.934	2.59685	0.49089	5.29009	1.22258e-07	2.23239e-05
AT3G14440	190.134	1.78877	0.338747	5.28055	1.28797e-07	2.32777e-05
AT4G15233	323.529	-1.86282	0.353454	-5.27032	1.36185e-07	2.43952e-05
AT3G50480	1113.16	-2.56866	0.488111	-5.26244	1.42152e-07	2.52408e-05
AT4G19820	38.4202	-1.9977	0.380043	-5.25652	1.4681e-07	2.58411e-05
AT5G44575	35.6855	-3.97216	0.756171	-5.25299	1.49646e-07	2.61133e-05
AT1G13920	206.407	1.35178	0.257579	5.24805	1.53719e-07	2.61477e-05
AT2G36970	449.356	-1.7641	0.336036	-5.24973	1.5232e-07	2.61477e-05
AT4G37520	412.889	-1.25429	0.238999	-5.2481	1.53674e-07	2.61477e-05
AT1G77120	195.239	1.46775	0.281472	5.21454	1.84273e-07	3.00811e-05
AT4G17870	882.399	-1.10374	0.212479	-5.1946	2.05164e-07	3.27003e-05
AT3G05880	977.83	1.29285	0.249866	5.17419	2.28902e-07	3.59181e-05
AT4G11460	16.0357	-7.12691	1.37722	-5.17484	2.28102e-07	3.59181e-05
AT1G09350	380.136	1.85281	0.361072	5.13141	2.87576e-07	4.40993e-05
AT1G21120	93.985	-3.30465	0.645055	-5.12305	3.00625e-07	4.57537e-05
AT2G31110	485.871	-1.27943	0.251018	-5.09698	3.45113e-07	5.21327e-05
AT4G18270	792.885	1.13013	0.2221	5.0884	3.61103e-07	5.38599e-05
AT5G08350	66.5191	-2.37317	0.466856	-5.0833	3.70928e-07	5.44081e-05
AT4G37180	529.883	1.28019	0.252303	5.07401	3.89528e-07	5.67253e-05
AT5G27420	250.387	-2.67998	0.530553	-5.05129	4.38831e-07	6.34487e-05
AT5G10170	430.31	-1.29219	0.256953	-5.02889	4.93339e-07	7.08239e-05
AT1G28660	390.295	-1.44438	0.287577	-5.02259	5.09782e-07	7.21609e-05
AT3G29575	220.581	2.1628	0.431965	5.00688	5.53182e-07	7.66953e-05
AT1G58370	131.576	-1.39931	0.279682	-5.00324	5.63753e-07	7.73333e-05
AT5G52640	298.106	-1.97303	0.395643	-4.9869	6.13548e-07	8.27962e-05
AT1G35350	558.522	-1.4657	0.294102	-4.98363	6.24021e-07	8.36519e-05
AT1G67810	247.464	-2.04581	0.410763	-4.98052	6.34127e-07	8.44474e-05
AT5G10740	203.601	-1.26412	0.253965	-4.97756	6.43893e-07	8.51875e-05
AT2G04170	254.516	1.24231	0.250039	4.96846	6.74871e-07	8.81338e-05
AT3G24515	83.0081	1.13938	0.229306	4.96883	6.73574e-07	8.81338e-05
AT2G19310	813.731	-1.04965	0.211918	-4.95312	7.30335e-07	9.37594e-05
AT2G37130	444.425	-1.31383	0.265275	-4.95272	7.31844e-07	9.37594e-05
AT5G25130	123.311	1.42872	0.288391	4.95409	7.26683e-07	9.37594e-05
AT2G39510	25.9883	2.9705	0.600807	4.94418	7.64669e-07	9.73486e-05
AT4G33050	1169.74	-1.60224	0.325061	-4.92905	8.26286e-07	0.000104535
AT1G19020	77.7924	-3.81603	0.775009	-4.92385	8.48584e-07	0.000105431
AT3G23550	644.973	-5.25399	1.06707	-4.92375	8.48992e-07	0.000105431
AT2G40330	44.6859	-4.69479	0.95951	-4.8929	9.93589e-07	0.000120432
AT5G57220	242.226	-3.83756	0.785884	-4.88311	1.04425e-06	0.00012582
AT5G40450	5561.73	-1.58164	0.323994	-4.8817	1.05178e-06	0.000125977
AT2G47560	37.9181	-2.08124	0.426471	-4.88014	1.0601e-06	0.000126227
AT5G54710	421.113	-1.52387	0.312752	-4.87246	1.10216e-06	0.000129708
AT1G26420	81.1255	-5.00094	1.02773	-4.866	1.13881e-06	0.000132481
AT1G25422	8.03176	6.53174	1.34584	4.85327	1.21443e-06	0.000139674
AT1G58360	1762.66	1.00364	0.207037	4.84764	1.24936e-06	0.000142879
AT2G29120	366.133	-1.02071	0.211105	-4.8351	1.33079e-06	0.000151337
AT5G24470	217.352	2.2489	0.466293	4.82293	1.41466e-06	0.000158207
AT4G22690	4321.61	-1.49379	0.310223	-4.81521	1.47043e-06	0.000162648
AT2G40130	534.76	1.68157	0.350079	4.80341	1.55989e-06	0.000171605
AT3G51910	48.8575	-2.08805	0.435615	-4.79334	1.64024e-06	0.000178504
AT1G65484	12.9716	-5.36998	1.12438	-4.77596	1.78854e-06	0.000191553
AT1G78460	2358.74	-1.75271	0.366914	-4.77691	1.78011e-06	0.000191553
AT5G15190	56.7815	1.96126	0.411083	4.77096	1.83354e-06	0.00019534
AT3G63380	120.506	-2.82309	0.592343	-4.76596	1.87954e-06	0.000199192
AT1G16390	226.453	-1.76088	0.370365	-4.75444	1.99001e-06	0.000209801
AT5G67190	143.889	-1.17985	0.248929	-4.73971	2.14021e-06	0.000223309
AT1G51820	13.1521	-6.52422	1.37924	-4.7303	2.2419e-06	0.000232721
AT1G10990	108.75	-2.18829	0.463546	-4.72076	2.34963e-06	0.000242659
AT1G57990	641.202	-2.00666	0.425489	-4.71611	2.40394e-06	0.00024576
AT1G65486	136.622	-1.57321	0.333858	-4.71221	2.4504e-06	0.000249252
AT2G47670	39.9223	2.33634	0.496098	4.70943	2.4841e-06	0.000251415
AT4G30460	187.834	1.57466	0.334557	4.70671	2.51751e-06	0.000253529
AT1G49560	244.777	1.03946	0.221114	4.701	2.58885e-06	0.000258145
AT2G35760	295.457	-1.04973	0.223293	-4.70115	2.58703e-06	0.000258145
AT3G63160	5456.39	1.20048	0.25602	4.68901	2.74527e-06	0.000268453
AT2G39920	256.217	1.7865	0.382101	4.67546	2.93302e-06	0.000283157
AT3G03341	23.8598	3.7381	0.799571	4.67513	2.9376e-06	0.000283157
AT5G20400	139.847	-1.21184	0.259522	-4.66951	3.01922e-06	0.000289645
AT1G16850	154.601	2.72806	0.584989	4.66344	3.10974e-06	0.000295527
AT2G28790	389.964	1.36739	0.29367	4.65622	3.22071e-06	0.000303226
AT1G05675	48.1981	-2.99528	0.64351	-4.6546	3.24616e-06	0.000303314
AT1G51800	163.997	-3.83328	0.823609	-4.65425	3.25161e-06	0.000303314
AT2G36950	572.307	-1.0293	0.221416	-4.64873	3.33982e-06	0.000310113
AT4G04955	707.844	-1.58308	0.341537	-4.63517	3.56636e-06	0.000328138
AT5G18670	316.119	-1.41167	0.30476	-4.63206	3.62048e-06	0.000330116
AT5G62210	117.137	1.24683	0.269802	4.62126	3.81422e-06	0.000344676
AT1G69260	97.4909	2.83006	0.615097	4.601	4.20462e-06	0.000378267
AT4G01750	129.204	-2.00073	0.436334	-4.5853	4.53327e-06	0.00040071
AT2G01210	77.6938	1.28334	0.281319	4.56188	5.06985e-06	0.000442034
AT5G64570	310.57	-1.31904	0.289171	-4.56146	5.07987e-06	0.000442034
AT3G02140	27.0494	-2.88202	0.632097	-4.55945	5.12868e-06	0.000443652
AT5G59320	1318.78	4.31158	0.946506	4.55526	5.23196e-06	0.000450661
AT3G04720	3873.04	-2.80187	0.617521	-4.5373	5.69804e-06	0.000486665
AT5G46790	411.198	-1.09042	0.240676	-4.53065	5.88017e-06	0.000498018
AT4G21870	100.291	-2.75395	0.608629	-4.52483	6.04439e-06	0.0005035
AT1G65900	311.465	1.25787	0.278346	4.51907	6.21113e-06	0.000515269
AT2G25470	13.9561	-5.6961	1.26195	-4.51373	6.36958e-06	0.000524685
AT1G07620	128.865	-1.75448	0.389067	-4.50944	6.49996e-06	0.000532681
AT1G01340	99.1251	-1.85844	0.412492	-4.50539	6.62518e-06	0.000538582
AT1G28010	120.301	-1.36323	0.303074	-4.49801	6.85932e-06	0.000553548
AT5G06640	6.33298	-23.188	5.17757	-4.47855	7.51508e-06	0.000601266
AT4G17245	276.344	-1.95805	0.437574	-4.47479	7.64882e-06	0.000609556
AT1G06160	209.865	-3.25002	0.729284	-4.45645	8.3328e-06	0.000651245
AT2G21590	612.906	1.16784	0.262643	4.44651	8.7278e-06	0.000679366
AT2G46680	726.727	1.77437	0.399118	4.44572	8.75973e-06	0.000679366
AT3G26200	452.627	-3.73475	0.841017	-4.44076	8.96431e-06	0.000691493
AT3G26510	1019.03	-1.62767	0.366569	-4.44027	8.98442e-06	0.000691493
AT1G15125	3563.79	-4.01878	0.905412	-4.43862	9.05364e-06	0.000694181
AT3G48850	28.6766	-5.73771	1.29417	-4.43351	9.27091e-06	0.000705496
AT1G26800	276.332	-1.65452	0.373865	-4.42546	9.62367e-06	0.000729597
AT1G33440	37.0058	2.02676	0.458931	4.41627	1.00418e-05	0.00075646
AT4G06746	65.1785	-3.11627	0.706395	-4.41151	1.02653e-05	0.000769591
AT1G26380	155.672	-5.32187	1.21033	-4.39703	1.09741e-05	0.000813689
AT3G24520	5.84936	6.03466	1.37398	4.3921	1.12262e-05	0.000826331
AT1G05010	6138.55	-1.26232	0.287609	-4.38902	1.13863e-05	0.00083206
AT1G22400	133.116	-1.82463	0.415929	-4.38687	1.14993e-05	0.000834296
AT3G62950	39.2498	-4.11068	0.939571	-4.37506	1.21399e-05	0.000866525
AT5G45380	657.078	-1.3647	0.311949	-4.37474	1.21575e-05	0.000866525
AT5G46050	36.4581	-2.28128	0.521899	-4.37112	1.23609e-05	0.00087793
AT5G03630	3109.09	-1.07646	0.246362	-4.36943	1.24571e-05	0.00087873
AT1G65390	24.3801	-4.0458	0.927931	-4.36002	1.30049e-05	0.000905529
AT2G41150	52.5165	-1.66897	0.383453	-4.35246	1.34616e-05	0.000929315
AT4G23400	3899.55	-1.14023	0.262499	-4.34374	1.40075e-05	0.000957907
AT5G43860	130.304	1.00589	0.231552	4.34411	1.39838e-05	0.000957907
AT3G24660	157.37	1.01122	0.232988	4.34024	1.42327e-05	0.000967669
AT5G54720	102.626	-1.48029	0.341433	-4.33551	1.45421e-05	0.000979886
AT1G52270	74.6227	-1.96293	0.453152	-4.33173	1.47943e-05	0.000991608
AT2G43590	935.446	-1.50254	0.347615	-4.32243	1.5432e-05	0.00103094
AT1G04425	51.4911	1.49162	0.346438	4.30559	1.66545e-05	0.001091
AT1G24070	706.993	2.34814	0.54517	4.30717	1.6536e-05	0.001091
AT3G59880	35.3737	-2.00072	0.464463	-4.3076	1.65032e-05	0.001091
AT1G06090	22.4662	2.01397	0.468047	4.30293	1.68557e-05	0.00110062
AT1G12845	335.68	1.0118	0.235216	4.30159	1.69575e-05	0.00110371
AT1G76680	2454.4	-1.0328	0.240643	-4.29184	1.77198e-05	0.00114231
AT5G22300	538.322	-1.44211	0.336709	-4.28295	1.84428e-05	0.00118139
AT1G21100	289.91	-3.37297	0.789223	-4.27379	1.92181e-05	0.00121567
AT1G27730	150.351	-2.79199	0.65435	-4.26681	1.98288e-05	0.00123121
AT3G26500	61.742	-3.33486	0.782354	-4.2626	2.0206e-05	0.00124996
AT4G19380	224.665	-1.28456	0.301393	-4.26207	2.02543e-05	0.00124996
AT1G13110	4143.06	-1.08207	0.254016	-4.25983	2.04585e-05	0.00125491
AT3G12580	1012.91	-2.36999	0.557975	-4.24749	2.16181e-05	0.00131805
AT5G45920	33.8483	1.55745	0.367229	4.24108	2.22451e-05	0.00134642
AT2G05380	9612.68	-1.11302	0.264294	-4.21132	2.53887e-05	0.00151598
AT3G08720	213.594	-1.11588	0.265689	-4.19995	2.6697e-05	0.00158012
AT4G30270	2486.45	-1.35406	0.323545	-4.18509	2.8505e-05	0.00166282
AT5G65280	127.472	1.33498	0.318945	4.1856	2.8441e-05	0.00166282
AT4G01985	44.1124	3.06707	0.740877	4.13977	3.47647e-05	0.00196019
AT2G14610	46.2677	-8.08165	1.95332	-4.1374	3.51264e-05	0.0019719
AT1G31173	372.608	1.31264	0.317678	4.13197	3.59673e-05	0.00200565
AT1G70260	136.097	1.8136	0.43927	4.12867	3.64871e-05	0.00202349
AT5G28630	38.207	-4.35537	1.05618	-4.12372	3.72808e-05	0.00205741
AT2G04070	30.4639	-2.37052	0.575616	-4.11823	3.81799e-05	0.00209441
AT1G72430	494.136	-1.40651	0.343021	-4.10035	4.12533e-05	0.00222513
AT3G29670	212.761	-1.07497	0.262382	-4.09697	4.18595e-05	0.00224753
AT5G02890	473.615	1.029	0.251339	4.09409	4.23825e-05	0.00226959
AT5G16360	17.915	2.52944	0.618551	4.0893	4.32672e-05	0.00230478
AT3G19620	369.889	1.11099	0.271854	4.08671	4.37533e-05	0.00232455
AT3G28007	144.682	1.87615	0.460269	4.07621	4.57753e-05	0.00241928
AT3G55980	519.43	-1.36882	0.336013	-4.0737	4.62712e-05	0.00243278
AT2G38290	522.788	-1.06518	0.261742	-4.06958	4.70972e-05	0.00246031
AT1G19510	26.2038	-2.26246	0.556763	-4.0636	4.83225e-05	0.00251451
AT4G00970	309.492	-1.74986	0.430949	-4.06048	4.89714e-05	0.00254174
AT1G18265	58.1684	1.40277	0.345805	4.05655	4.98035e-05	0.00256159
AT1G30720	35.4594	-3.69191	0.910172	-4.05628	4.98601e-05	0.00256159
AT4G31500	7504.05	-1.20949	0.298105	-4.05725	4.96546e-05	0.00256159
AT5G48250	90.2636	1.16158	0.286628	4.05255	5.06628e-05	0.00259246
AT2G25735	108.229	-4.83521	1.19429	-4.0486	5.15244e-05	0.00262092
AT2G43620	218.12	-3.48866	0.862534	-4.04467	5.23971e-05	0.00265537
AT2G30010	1013.58	-1.32952	0.328873	-4.04267	5.28459e-05	0.00266096
AT1G25560	947.993	-1.5	0.371659	-4.03596	5.43785e-05	0.00272871
AT3G59480	11.8077	2.96956	0.736895	4.02983	5.58182e-05	0.0027761
AT1G20070	173.945	1.21216	0.301294	4.02319	5.74144e-05	0.00284152
AT5G11670	12674.7	-1.0505	0.261241	-4.02118	5.79062e-05	0.00285191
AT4G23130	486.955	-1.33227	0.331916	-4.01388	5.97282e-05	0.00292741
AT5G59220	192.662	2.36268	0.588558	4.01436	5.96074e-05	0.00292741
AT5G66230	173.393	1.08995	0.27235	4.00201	6.28066e-05	0.00304146
AT5G41040	91.0649	1.3092	0.32853	3.98502	6.74755e-05	0.00323659
AT5G16570	216.898	-2.06506	0.51862	-3.98183	6.83869e-05	0.0032708
AT5G25280	2386.84	-1.07136	0.269776	-3.97127	7.14891e-05	0.00339691
AT1G18710	416.286	1.32619	0.334783	3.96133	7.45345e-05	0.00350867
AT2G24720	7.25804	20.6385	5.22162	3.95252	7.7333e-05	0.00361518
AT3G28455	56.3373	1.29441	0.327828	3.94845	7.86596e-05	0.00366029
AT5G52740	22.8096	-2.53701	0.643331	-3.94355	8.02851e-05	0.00370138
AT3G13175	78.0424	1.13946	0.28951	3.9358	8.29185e-05	0.00379737
AT2G23770	196.143	-1.50545	0.382585	-3.93495	8.32125e-05	0.00380223
AT1G04040	1169.2	-1.39161	0.353775	-3.93361	8.36809e-05	0.00381502
AT1G70640	23.8786	2.77336	0.705906	3.9288	8.53718e-05	0.00388336
AT2G30370	24.8885	2.06118	0.525119	3.92516	8.66727e-05	0.0039249
AT3G49620	51.1987	-5.52846	1.41081	-3.91865	8.90481e-05	0.00400558
AT2G39200	50.2607	-2.18267	0.558824	-3.90583	9.39025e-05	0.00415924
AT2G37870	188.151	4.48272	1.14885	3.90193	9.54288e-05	0.00420843
ATCG00180	172.585	1.22177	0.313168	3.90133	9.56648e-05	0.00420967
AT3G08770	884.687	1.1303	0.289947	3.89829	9.68752e-05	0.00425368
AT3G06070	307.147	-1.7097	0.438727	-3.89696	9.74073e-05	0.00426779
AT3G28220	1976.75	2.54413	0.653404	3.89365	9.87456e-05	0.00431708
AT2G15390	212.122	-2.20691	0.567767	-3.887	0.00010149	0.00441461
AT3G53980	437.817	2.43672	0.626944	3.88667	0.000101631	0.00441461
AT4G09820	130.997	2.47896	0.639612	3.87572	0.000106309	0.00457432
AT4G33260	137.67	1.18877	0.306745	3.87543	0.000106437	0.00457432
AT5G48570	257.072	-1.18202	0.304966	-3.87591	0.000106227	0.00457432
AT5G10410	117.654	1.46387	0.378661	3.86591	0.000110675	0.0046868
AT1G01180	247.751	-1.17757	0.304738	-3.86418	0.000111461	0.00470039
AT2G41100	1878.09	-2.51963	0.652	-3.86447	0.000111329	0.00470039
AT5G28910	98.1046	1.24055	0.321798	3.85506	0.000115703	0.00483898
AT5G61440	69.2776	-2.0749	0.538473	-3.8533	0.000116534	0.00486368
AT2G22800	91.8716	-1.16757	0.303267	-3.84996	0.000118139	0.00490034
AT5G66400	586.849	1.41505	0.367725	3.84812	0.000119029	0.00492716
AT2G05440	252.099	3.07631	0.800285	3.84402	0.000121037	0.00497974
AT1G77760	433.034	1.5669	0.407765	3.84264	0.000121717	0.00499755
AT4G22880	829.339	3.77556	0.982709	3.84199	0.000122042	0.00500076
AT3G26830	337.967	-4.23884	1.1041	-3.83918	0.000123447	0.00504811
AT5G25930	267.193	-1.8068	0.470862	-3.83722	0.000124436	0.00506853
AT2G18150	54.0842	2.17929	0.568344	3.83445	0.000125846	0.00511521
AT3G58650	114.858	1.05062	0.274321	3.8299	0.000128195	0.00516915
AT5G19230	98.4799	-1.90134	0.497542	-3.82146	0.000132665	0.0052869
AT2G20560	176.022	-1.01928	0.26697	-3.81795	0.000134566	0.00533567
AT1G70985	85.2575	-1.11528	0.292377	-3.81453	0.000136442	0.00538372
AT4G16590	31.9462	4.20218	1.10323	3.80897	0.000139547	0.00543215
AT5G64510	59.4522	-1.40994	0.371328	-3.79703	0.000146442	0.00565702
AT2G35930	107.231	-2.25764	0.594775	-3.7958	0.00014717	0.00566354
AT3G50770	25.9999	-2.85847	0.755096	-3.78557	0.000153355	0.00584596
AT4G18440	4659.36	1.1418	0.302041	3.78028	0.000156653	0.00593838
AT5G09440	371.393	-1.02289	0.270951	-3.7752	0.000159877	0.00602828
AT5G20830	910.717	1.14546	0.303422	3.77513	0.000159924	0.00602828
AT2G34190	116.228	1.12425	0.297944	3.77336	0.000161064	0.006057
AT3G54390	169.001	1.2041	0.319339	3.77059	0.000162865	0.00609375
AT3G16690	102.543	-1.03916	0.275746	-3.76856	0.000164193	0.00610954
AT1G69520	68.2371	-1.4093	0.374442	-3.76373	0.000167399	0.00619467
AT4G37610	80.6419	-2.63316	0.700033	-3.76148	0.000168909	0.00620517
AT5G56870	189.018	-2.18921	0.581975	-3.7617	0.000168762	0.00620517
AT4G23280	17.7139	-4.16215	1.10702	-3.75977	0.00017007	0.00623652
AT1G52200	241.706	-2.59155	0.689383	-3.75924	0.000170432	0.00623849
AT5G07000	418.826	-1.09363	0.290999	-3.75818	0.000171157	0.00625371
AT1G18570	414.039	-1.75267	0.468023	-3.74482	0.00018052	0.00652514
AT3G13790	173.964	-1.67828	0.448143	-3.74497	0.000180415	0.00652514
AT3G23870	64.6301	1.51619	0.404825	3.74531	0.000180171	0.00652514
AT3G54640	1814.35	-1.27815	0.34142	-3.74362	0.000181389	0.00654487
AT3G03000	137.233	-1.03266	0.27621	-3.73868	0.00018499	0.00660417
AT1G01640	31.2283	1.49759	0.400669	3.73771	0.000185703	0.00660632
AT3G09910	77.9118	1.47475	0.394897	3.73451	0.000188081	0.00667918
AT1G30250	19.5908	3.82407	1.02437	3.73309	0.000189144	0.00670518
AT2G18980	10.8139	3.97013	1.06421	3.73059	0.000191034	0.00676033
AT2G24980	3.72891	-19.2456	5.18053	-3.71498	0.000203223	0.00701988
AT2G29090	160.898	1.06794	0.28758	3.71355	0.000204372	0.00704754
AT1G13260	1011.53	-1.23043	0.332595	-3.69948	0.000216045	0.00737467
AT2G39800	12652.5	2.29695	0.62185	3.69373	0.000220986	0.00749317
AT4G33070	21.9639	3.14627	0.85179	3.69372	0.000220997	0.00749317
AT3G55940	128.541	1.13398	0.307119	3.69232	0.000222222	0.00750954
AT1G26410	33.2039	-6.32495	1.71642	-3.68496	0.000228739	0.00769125
AT1G31690	519.815	1.08318	0.294237	3.68132	0.000232029	0.00778893
AT1G09970	2843.27	-1.18525	0.322032	-3.68055	0.000232734	0.00779966
AT4G23810	110.821	-1.81133	0.492587	-3.67717	0.000235838	0.00786462
AT5G47230	90.3639	-1.73103	0.470728	-3.67734	0.00023568	0.00786462
AT5G46780	289.665	-1.10952	0.302022	-3.67364	0.000239118	0.00790892
AT5G06630	3.13054	-19.0191	5.18116	-3.67082	0.00024177	0.00798352
AT4G37970	61.2487	1.33081	0.363074	3.66539	0.000246963	0.00808304
AT2G31730	125.361	-1.47518	0.403045	-3.66009	0.000252127	0.00819508
AT5G25450	11.9642	-2.77132	0.757506	-3.65848	0.000253712	0.0082234
AT5G40800	133.05	1.73779	0.476416	3.64763	0.000264667	0.0084635
AT5G05730	1483.31	-1.23121	0.337783	-3.64499	0.000267403	0.00852405
AT5G22250	119.955	-1.21535	0.333731	-3.6417	0.000270848	0.00860677
AT1G17710	11.2389	-5.07357	1.39409	-3.63933	0.000273344	0.00861841
AT3G50280	43.805	2.20215	0.605379	3.63763	0.000275154	0.0086419
AT5G52300	49.1625	2.84259	0.781841	3.63576	0.000277158	0.00868457
AT3G11020	35.8797	1.85571	0.510592	3.63443	0.000278591	0.00871598
AT5G59820	21.3815	-3.30522	0.910595	-3.62974	0.000283708	0.00880801
AT2G23000	587.453	1.09743	0.303134	3.62026	0.000294303	0.00908122
AT4G16260	585.196	-4.22081	1.16618	-3.61933	0.000295366	0.00910016
AT5G20960	429.603	-1.36983	0.378652	-3.61763	0.000297308	0.00913931
AT3G13960	38.5234	1.83306	0.506972	3.6157	0.000299536	0.00918667
AT4G12400	77.7788	-1.503	0.416743	-3.60655	0.000310297	0.00941141
AT5G20790	20.2364	-2.41262	0.669273	-3.60484	0.000312346	0.00943658
AT2G11810	113.493	-1.56233	0.433802	-3.60147	0.000316417	0.00954533
AT1G68840	1912.9	-1.71444	0.476241	-3.59994	0.000318293	0.00958761
AT4G03450	88.3734	-2.48063	0.68925	-3.59902	0.000319415	0.00960712
AT4G27480	83.3437	-1.06636	0.297223	-3.58776	0.000333533	0.00989939
AT4G01720	115.571	-1.26325	0.352467	-3.58403	0.000338335	0.0100125
AT4G39670	13.1317	-3.45317	0.963939	-3.58235	0.000340519	0.0100625
AT1G53860	15.7388	2.36314	0.660013	3.58045	0.000343009	0.0101065
AT1G07430	222.919	2.96539	0.828403	3.57965	0.000344059	0.0101216
AT1G53100	61.7363	2.43541	0.683531	3.56298	0.000366671	0.0106182
AT5G40990	20.8388	-4.64089	1.30247	-3.56315	0.000366427	0.0106182
AT3G26320	34.6376	-1.66433	0.467807	-3.55772	0.000374081	0.0107713
AT5G47610	145.443	-1.01213	0.284776	-3.55411	0.000379259	0.0108619
AT5G61590	1671.95	-1.30798	0.368066	-3.55366	0.000379913	0.0108619
AT5G03870	58.3571	1.53278	0.431479	3.55238	0.000381769	0.0108995
AT4G02280	264.356	1.40811	0.396847	3.54824	0.00038782	0.0110247
AT5G06760	19.8637	2.90145	0.817796	3.54789	0.000388332	0.0110247
AT3G52480	70.7188	-1.57618	0.445044	-3.54164	0.000397655	0.0112108
AT1G59950	22.9436	-5.47669	1.55102	-3.53102	0.000413957	0.0115617
AT5G55950	62.292	1.33852	0.379816	3.52414	0.000424857	0.0117969
AT2G40095	76.5203	-1.57559	0.448085	-3.51628	0.000437635	0.0120774
AT2G26150	60.5246	-2.67002	0.760197	-3.51227	0.000444297	0.012236
AT5G01740	80.0368	-1.21073	0.345264	-3.50669	0.000453719	0.0124616
AT2G23290	165.323	-1.35673	0.38706	-3.50523	0.00045621	0.0124733
AT3G57010	78.5594	1.47331	0.420386	3.50466	0.000457183	0.0124733
AT4G21850	57.5057	-2.03571	0.581329	-3.50181	0.000462105	0.0125829
AT4G26950	66.2477	-1.59085	0.454784	-3.49802	0.000468721	0.0126336
AT4G19230	94.5091	1.25634	0.359842	3.49137	0.000480556	0.0129011
AT4G30700	54.6201	1.07224	0.30784	3.48313	0.00049559	0.0131996
AT5G67450	21.1807	-1.87686	0.539126	-3.48131	0.000498971	0.0132722
AT2G17740	26.2042	-4.34624	1.24908	-3.47956	0.000502237	0.0133416
AT5G47500	973.494	1.21306	0.34874	3.47841	0.000504391	0.0133812
AT1G01600	236.302	-1.05018	0.301982	-3.47763	0.000505868	0.0134029
AT4G12470	235.019	-2.47475	0.712209	-3.47474	0.00051134	0.0135051
AT4G36040	5185.75	-1.05881	0.30472	-3.47469	0.000511442	0.0135051
AT3G01290	673.213	-2.54803	0.735869	-3.46262	0.000534953	0.0139723
AT4G30610	189.71	-1.23025	0.355701	-3.45866	0.00054287	0.0141608
AT3G55950	100.626	-1.23371	0.356912	-3.45663	0.000546971	0.0142311
AT1G07610	112.141	2.51974	0.729082	3.45604	0.000548171	0.014244
AT2G30930	800.702	-1.09191	0.3163	-3.45213	0.00055618	0.0144151
AT4G37490	67.7924	1.28987	0.374101	3.44793	0.000564908	0.0146226
AT2G26695	117.753	-1.32528	0.384721	-3.44478	0.000571525	0.0147738
AT5G52250	42.893	-1.8037	0.523706	-3.44411	0.000572938	0.0147738
AT5G59310	479.66	3.01761	0.876138	3.44422	0.000572707	0.0147738
AT1G53035	66.5702	1.01484	0.294896	3.44134	0.000578836	0.0148807
AT1G11080	32.7989	1.90866	0.555285	3.43726	0.000587636	0.0150372
AT4G27280	207.158	-1.52508	0.44384	-3.43611	0.000590128	0.0150635
AT1G79450	31.1015	1.71703	0.50023	3.43248	0.000598094	0.0152419
AT1G80840	98.6957	-2.55238	0.743649	-3.43224	0.000598621	0.0152419
AT5G52882	557.153	-1.50669	0.439273	-3.42997	0.000603658	0.0153315
AT1G08930	1810.03	-1.7435	0.508457	-3.429	0.00060582	0.0153513
AT4G08570	113.703	3.05016	0.889537	3.42894	0.000605954	0.0153513
AT5G38020	64.0387	2.14227	0.624908	3.42814	0.000607724	0.0153769
AT5G11320	8.91554	2.53045	0.739051	3.42392	0.000617243	0.0155423
AT3G26790	27.6629	1.76442	0.515745	3.42111	0.000623651	0.0156619
AT4G21120	34.5632	-2.33732	0.68386	-3.41783	0.000631225	0.0157744
AT5G03350	2632.05	1.99299	0.584259	3.41115	0.000646898	0.0160969
AT3G03170	27.0911	1.59282	0.467833	3.40468	0.000662424	0.0163522
AT3G60900	67.6741	1.222	0.359544	3.39874	0.000676968	0.0166631
AT5G25970	10.0523	5.77451	1.69912	3.39853	0.000677487	0.0166631
AT1G02205	1761.43	1.6584	0.488665	3.39374	0.000689443	0.0168751
AT1G75060	51.9028	1.21284	0.35749	3.39265	0.000692193	0.0169015
AT5G20250	623.63	-2.8756	0.85045	-3.38127	0.000721506	0.0174281
AT1G48100	316.571	1.02176	0.302336	3.37955	0.000726058	0.0174547
AT3G47790	7.53548	3.85295	1.14001	3.37976	0.000725501	0.0174547
AT4G20970	18.4411	1.98079	0.586251	3.37873	0.000728207	0.0174649
AT3G29590	231.111	3.22921	0.95659	3.37575	0.000736157	0.0176138
AT5G43890	9.54935	-3.16689	0.93837	-3.37488	0.000738474	0.0176484
AT2G23690	54.0757	-1.24884	0.37023	-3.37314	0.000743164	0.0177186
AT5G28640	74.772	1.68596	0.499948	3.37227	0.000745515	0.0177538
AT1G11210	443.788	2.12093	0.629243	3.3706	0.000750033	0.0178195
AT2G43000	55.8989	-2.16073	0.642761	-3.36163	0.000774826	0.0182797
AT4G06536	50.0354	1.24958	0.371847	3.36047	0.000778094	0.0183142
AT2G30660	13.1098	4.06982	1.21286	3.35555	0.000792063	0.0185138
AT2G26020	192.675	-5.43365	1.62098	-3.35207	0.000802109	0.018727
AT2G40955	6.17341	5.36487	1.60784	3.33671	0.000847777	0.019484
AT1G13130	16.7008	3.16124	0.947968	3.33475	0.000853754	0.0195049
AT1G13245	1071.94	-1.08773	0.326338	-3.33314	0.000858716	0.0195049
AT5G05270	500.441	1.37039	0.410997	3.3343	0.000855149	0.0195049
AT5G19240	862.55	-1.04679	0.314145	-3.33218	0.000861687	0.0195049
AT1G64710	2011.31	-1.05076	0.315406	-3.33146	0.000863912	0.0195171
AT1G18870	406.783	1.32953	0.399831	3.32522	0.000883493	0.0198267
AT5G15430	11.5788	2.12423	0.638933	3.32465	0.000885285	0.0198449
AT2G34850	72.8483	1.24108	0.37342	3.32356	0.000888775	0.0199011
AT1G78410	66.7631	-2.64296	0.796332	-3.31891	0.000903683	0.020121
AT3G16420	4124.14	-1.07953	0.32584	-3.31307	0.000922793	0.0204316
AT5G25090	114.202	1.10632	0.333981	3.31252	0.000924581	0.0204316
AT5G44430	173.373	-7.07314	2.13512	-3.31276	0.000923801	0.0204316
AT3G13784	15.1021	2.86256	0.865987	3.30554	0.000947926	0.0207662
AT3G47510	87.5336	1.01739	0.307959	3.30364	0.00095439	0.0208176
AT5G14730	46.8867	-2.85749	0.866509	-3.29771	0.000974782	0.0211259
AT3G01830	5.09434	-6.19896	1.88016	-3.29704	0.0009771	0.0211534
AT1G22890	292.149	-2.19914	0.667795	-3.29314	0.000990767	0.0213731
AT2G32030	21.0559	-3.66936	1.11416	-3.29338	0.000989892	0.0213731
AT2G38940	126.047	-1.25687	0.381857	-3.29146	0.000996674	0.0214168
AT5G38970	60.6077	-1.1329	0.34431	-3.29036	0.0010006	0.0214784
AT1G59540	118.428	1.08532	0.330208	3.28679	0.00101335	0.0215918
AT4G36570	165.301	-2.05683	0.625767	-3.28689	0.00101301	0.0215918
AT3G21770	93.0523	1.29029	0.393561	3.2785	0.0010436	0.0220048
AT3G24420	53.2548	2.19358	0.670126	3.27338	0.0010627	0.0222913
AT5G20230	118.268	-1.8724	0.572233	-3.27209	0.00106755	0.0223699
AT1G25530	206.912	1.11368	0.340581	3.26995	0.00107568	0.0225169
AT2G18370	31.7775	2.92186	0.893843	3.26887	0.00107977	0.0225668
AT2G26650	340.225	-1.14962	0.351886	-3.26701	0.0010869	0.0226815
AT3G01990	68.2258	-1.51058	0.462966	-3.26282	0.00110308	0.0228595
AT3G50740	3036.79	-1.05119	0.322019	-3.26436	0.0010971	0.0228595
AT1G32920	216.869	-1.37862	0.42275	-3.26108	0.00110989	0.0228782
AT1G19530	7.64364	4.07972	1.25305	3.25582	0.00113065	0.0231941
AT3G14360	58.8532	1.56664	0.481234	3.25546	0.00113209	0.0231941
AT5G15970	8272.46	1.66871	0.51255	3.25571	0.0011311	0.0231941
AT1G67820	69.1062	1.19498	0.367609	3.25069	0.00115126	0.0234445
AT5G23480	51.0089	-1.41227	0.434937	-3.24708	0.00116597	0.0236488
AT1G06830	61.5773	-1.5583	0.481049	-3.23939	0.00119787	0.0241508
AT5G61600	198.513	-1.6673	0.515111	-3.23677	0.00120891	0.0243268
AT1G55850	1571.22	-1.0371	0.320453	-3.23634	0.00121072	0.0243286
AT5G43980	59.8148	1.04297	0.322287	3.23616	0.0012115	0.0243286
AT1G19970	127.534	1.08321	0.336924	3.215	0.00130442	0.025735
AT3G60670	16.5369	2.25451	0.701816	3.21239	0.00131634	0.0259197
AT3G14225	6.14326	-4.51398	1.4057	-3.2112	0.00132182	0.0259769
AT2G25540	18.1354	1.68257	0.524222	3.20965	0.00132896	0.026072
AT2G42530	3044.44	1.537	0.479176	3.20759	0.00133854	0.0262133
AT4G04330	649.617	1.22649	0.382462	3.20683	0.00134205	0.0262472
AT4G31877	48.3435	-1.2917	0.403693	-3.1997	0.00137573	0.026725
AT5G37490	3.34232	-5.22881	1.63457	-3.1989	0.00137955	0.0267736
AT1G03870	987.364	-1.81577	0.568804	-3.19227	0.0014116	0.0272331
AT2G38300	85.1653	-1.05964	0.331961	-3.19205	0.00141265	0.0272331
AT1G34580	130.553	1.25629	0.393653	3.19137	0.001416	0.0272697
AT2G22770	74.3902	-1.00636	0.315543	-3.18931	0.00142614	0.027389
AT1G08090	162.774	4.95751	1.55613	3.1858	0.00144357	0.0276188
AT1G60730	491.065	-1.13849	0.357358	-3.18586	0.00144323	0.0276188
AT5G60950	93.6398	-1.5671	0.492456	-3.18221	0.00146157	0.0278427
AT5G57123	27.0929	1.69552	0.533309	3.17925	0.00147656	0.0280643
AT1G02640	207.892	-1.14232	0.35939	-3.17851	0.00148037	0.0281103
AT4G15236	60.49	-2.74854	0.865006	-3.17748	0.00148561	0.0281835
AT5G02490	253.402	-1.22571	0.385928	-3.176	0.00149323	0.0282485
AT2G28630	353.885	-1.36674	0.430377	-3.17568	0.00149485	0.0282529
AT1G19960	2681.91	1.51489	0.479647	3.15834	0.00158668	0.0297385
AT4G39030	204.04	-1.03388	0.327862	-3.1534	0.00161378	0.0301627
AT2G34960	106.987	-1.4191	0.450084	-3.15298	0.00161615	0.030179
AT4G13280	29.3725	1.6367	0.519277	3.15188	0.00162221	0.0302364
AT1G66960	27.5919	-3.24452	1.03033	-3.14901	0.00163823	0.030451
AT4G37530	145.102	-1.0781	0.342646	-3.14639	0.00165297	0.0306125
AT5G59680	62.66	-2.07389	0.659607	-3.14413	0.00166579	0.0307374
AT5G60100	153.675	1.28072	0.407318	3.14429	0.00166491	0.0307374
AT1G68620	74.3221	-2.23775	0.711828	-3.14367	0.00166845	0.0307584
AT3G55660	114.331	1.2146	0.387251	3.13647	0.00170995	0.0312771
AT5G65600	23.4729	-3.83348	1.22321	-3.13395	0.00172468	0.0314592
AT2G42540	10964.3	2.3024	0.734957	3.1327	0.00173206	0.0314806
AT1G60470	21.4226	3.56133	1.13765	3.13043	0.00174548	0.0315994
AT3G62730	3.34765	5.77604	1.84708	3.12713	0.00176523	0.0317704
AT1G69490	312.27	-1.49609	0.478651	-3.12564	0.00177417	0.0318658
AT2G18660	46.5768	-2.04949	0.655774	-3.1253	0.00177623	0.0318744
AT4G23190	168.243	-1.38037	0.441925	-3.12355	0.00178686	0.0320369
AT1G51920	7.10228	-6.2618	2.00906	-3.11678	0.00182841	0.0325511
AT1G20160	430.237	1.02298	0.32828	3.11617	0.00183217	0.0325895
AT3G57240	156.621	-3.01338	0.967469	-3.11471	0.00184128	0.0326653
AT5G53486	85.4379	1.48817	0.478312	3.11129	0.00186272	0.0329016
AT1G21550	23.9604	-2.06131	0.662988	-3.10912	0.00187649	0.0330582
AT5G59080	375.62	-1.08747	0.350645	-3.10134	0.00192647	0.033683
AT2G26560	946	-2.47235	0.797382	-3.10058	0.00193141	0.0337322
AT5G44990	4.6634	-5.3315	1.71995	-3.09981	0.00193647	0.0337623
AT2G40000	692.094	-1.78579	0.576418	-3.09809	0.00194771	0.0338772
AT3G55646	13.4883	-5.13509	1.65771	-3.09771	0.00195022	0.0338854
AT4G02290	232.604	1.02628	0.331383	3.09697	0.00195509	0.0339247
AT5G62360	125.552	-1.63136	0.526779	-3.09686	0.00195584	0.0339247
AT1G66920	232.822	-1.06297	0.343531	-3.09426	0.00197307	0.0341111
AT2G33380	1129.84	1.63565	0.528615	3.09422	0.00197333	0.0341111
AT3G09520	39.1234	-1.60077	0.518156	-3.08937	0.00200584	0.0345551
AT4G18250	206.521	-2.21782	0.718293	-3.08762	0.00201764	0.0346698
AT5G42800	1278.25	3.44612	1.11654	3.08643	0.00202579	0.0346757
AT2G21820	14.6253	2.57355	0.835188	3.08141	0.00206026	0.0350452
AT5G06940	70.9009	1.33208	0.43359	3.0722	0.00212485	0.0359926
AT4G24350	1787.48	-1.07714	0.351015	-3.06865	0.00215027	0.0363321
AT1G09500	35.4828	2.77078	0.9046	3.06299	0.0021914	0.0369345
AT4G30830	26.51	1.44252	0.471632	3.05858	0.00222391	0.037389
AT1G10070	157.859	-1.12965	0.369411	-3.05797	0.00222844	0.037434
AT1G79680	27.3101	-5.25579	1.72171	-3.05266	0.00226821	0.0379761
AT2G29710	21.7178	1.47315	0.482762	3.05152	0.00227689	0.0380863
AT3G30775	488.959	-1.98928	0.651946	-3.0513	0.00227856	0.0380863
AT1G35210	41.4147	-2.61471	0.858426	-3.04594	0.00231954	0.0386287
AT1G58190	19.6747	-2.442	0.802408	-3.04334	0.00233969	0.0387879
AT5G26920	221.879	-1.37965	0.453286	-3.04367	0.0023371	0.0387879
AT3G21520	9.84908	-5.61827	1.84964	-3.0375	0.00238553	0.0392266
AT3G15630	175.809	-1.55748	0.512869	-3.0368	0.002391	0.0392528
AT3G21080	11.5724	-2.83197	0.932546	-3.03681	0.00239093	0.0392528
AT2G36630	1234.21	-1.43067	0.471365	-3.03517	0.00240403	0.0393073
AT5G67080	6.64572	-4.45124	1.46721	-3.03381	0.00241483	0.039452
AT3G53210	85.1268	1.00142	0.33047	3.0303	0.00244314	0.0397951
AT5G14750	11.6944	-2.28992	0.755692	-3.03023	0.00244369	0.0397951
AT4G25480	261.392	2.67887	0.884447	3.02886	0.00245475	0.039911
AT4G23990	546.492	1.22875	0.4063	3.02425	0.00249247	0.0402655
AT4G37690	30.2693	1.23906	0.409653	3.02465	0.00248918	0.0402655
AT1G27921	27.2265	-1.56963	0.519087	-3.02384	0.00249592	0.0402891
AT1G70270	10.405	-2.88647	0.954839	-3.02299	0.00250288	0.0403692
AT1G76790	283.633	1.13478	0.375674	3.02065	0.00252232	0.0405869
AT2G26180	56.2247	1.19142	0.394426	3.02064	0.0025224	0.0405869
AT3G10200	65.801	1.04926	0.347502	3.01944	0.00253239	0.0406911
AT1G07050	14.6435	2.39668	0.793835	3.01911	0.00253515	0.0406951
AT1G03940	256.304	1.62439	0.538105	3.01872	0.00253842	0.0407153
AT1G21240	76.444	-2.49201	0.82593	-3.01722	0.00255107	0.0408535
AT5G37670	30.8379	1.28462	0.426186	3.01423	0.0025763	0.040998
AT4G17860	11.1061	-3.64607	1.21292	-3.00603	0.00264681	0.0417971
AT5G05960	230.01	1.33946	0.446004	3.00324	0.00267118	0.0420779
AT3G09020	184.617	-2.41115	0.80414	-2.99842	0.0027138	0.0426166
AT2G01610	56.0253	1.59491	0.532497	2.99515	0.00274312	0.0429437
AT1G51790	148.175	-1.78261	0.595362	-2.99416	0.00275203	0.0429503
AT3G01710	78.8567	1.01271	0.338206	2.99436	0.00275019	0.0429503
AT1G22065	10.7241	2.54728	0.851279	2.9923	0.00276882	0.0431127
AT2G37260	106.266	1.06826	0.357134	2.9912	0.00277882	0.0432019
AT1G33030	35.6381	-2.46117	0.823448	-2.98886	0.0028002	0.0435009
AT1G65490	300.41	-1.02318	0.343054	-2.98257	0.00285839	0.0441676
AT3G09440	6961.44	-1.57328	0.527613	-2.98188	0.00286483	0.0441997
AT2G24600	300.091	-1.86265	0.624965	-2.98041	0.00287861	0.0443446
AT4G36260	61.0963	1.10618	0.371213	2.97991	0.00288335	0.0443839
AT1G78440	23.1939	2.12944	0.71573	2.9752	0.00292793	0.0448301
AT3G01600	18.0264	2.29315	0.770871	2.97475	0.00293227	0.0448301
AT4G01630	7.07232	3.58606	1.20544	2.97489	0.00293093	0.0448301
AT1G17190	118.953	1.0788	0.363286	2.96955	0.00298238	0.0453732
AT3G45440	12.6737	1.93294	0.651487	2.96697	0.00300751	0.0454951
AT5G14690	60.2249	-1.0815	0.365528	-2.95873	0.00308914	0.0463445
AT5G52310	9041.65	2.14144	0.723884	2.95827	0.0030937	0.0463445
AT4G31620	19.9028	1.68049	0.568331	2.95688	0.00310772	0.0463813
AT5G44572	64.1812	-1.14822	0.388345	-2.95672	0.00310935	0.0463813
AT5G51190	51.6472	-1.88298	0.63741	-2.95412	0.00313562	0.0466015
AT3G05320	61.1938	-1.25375	0.424479	-2.95362	0.00314071	0.0466429
AT3G15518	26.803	-2.04	0.691752	-2.94904	0.00318761	0.0470976
AT4G16740	8.8752	5.27028	1.78729	2.94875	0.00319061	0.0471075
AT3G21620	6.93276	2.95312	1.00229	2.94636	0.00321542	0.0473013
AT3G02885	20.4831	2.55125	0.866252	2.94516	0.00322792	0.0473818
AT2G48075	3.53188	4.39243	1.4918	2.94439	0.0032359	0.0474301
AT5G36925	8.86371	-2.80502	0.955207	-2.93655	0.00331882	0.0482266
AT2G24700	24.4676	1.55795	0.53078	2.93522	0.00333315	0.0483654
AT1G72920	96.3268	-1.15271	0.393164	-2.93188	0.00336916	0.0487065
AT2G28500	49.4823	1.37793	0.47004	2.93152	0.00337312	0.0487065
AT4G28290	59.1592	-1.13728	0.387954	-2.93148	0.0033735	0.0487065
AT2G43375	81.5708	-1.12782	0.385149	-2.92828	0.00340847	0.0490652
AT5G41761	76.7842	-2.00278	0.683935	-2.92832	0.00340804	0.0490652
AT3G50570	31.4779	-1.69941	0.580542	-2.92728	0.00341939	0.0491586
AT5G17220	1010.2	3.36854	1.15156	2.92521	0.00344226	0.0493123

## Sheet: suf
Gene ID	Base mean	log2 FC	SE	Statistic	P	adjusted P
AT4G30650	2418.08	1.99199	0.174756	11.3987	4.24526e-30	8.59325e-26
AT3G05650	603.382	1.47062	0.157873	9.31523	1.21683e-20	1.23155e-16
AT1G68050	82.2296	2.77278	0.35498	7.81108	5.67003e-15	2.86932e-11
AT3G50970	254.479	3.82811	0.506082	7.5642	3.9025e-14	1.57989e-10
AT1G65845	131.097	-2.22578	0.302199	-7.36528	1.76775e-13	5.90785e-10
AT5G55930	752.221	-2.57451	0.357658	-7.19826	6.09856e-13	1.54309e-09
AT4G02520	9054.67	-2.47249	0.346422	-7.13723	9.5232e-13	2.14187e-09
AT1G22690	655.523	-1.88855	0.271415	-6.95817	3.44719e-12	6.34345e-09
AT4G16146	396.658	1.92303	0.277559	6.92836	4.25743e-12	7.18158e-09
AT3G16670	1722.96	-2.53251	0.369229	-6.85891	6.93876e-12	1.00325e-08
AT5G15960	109.024	3.82042	0.556256	6.86809	6.50668e-12	1.00325e-08
AT3G05660	528.336	1.58676	0.232378	6.82838	8.58775e-12	1.09579e-08
AT3G16660	656.54	-2.00494	0.293672	-6.82715	8.66151e-12	1.09579e-08
AT3G02380	557	-1.21975	0.179028	-6.81319	9.54582e-12	1.13663e-08
AT1G09070	2140.61	-1.14726	0.172052	-6.6681	2.59128e-11	2.76067e-08
AT4G37520	412.889	-1.60415	0.241127	-6.6527	2.87769e-11	2.91251e-08
AT1G59960	500.525	-1.06496	0.161098	-6.61064	3.8267e-11	3.68858e-08
AT1G68440	434.475	-1.53274	0.233381	-6.56752	5.11608e-11	4.70726e-08
AT5G24110	38.9632	-5.01564	0.766719	-6.54169	6.0827e-11	5.35331e-08
AT2G41190	442.004	2.06145	0.316635	6.51048	7.49105e-11	6.31807e-08
AT3G29670	212.761	-1.73533	0.267866	-6.47836	9.27267e-11	7.5079e-08
AT4G37610	80.6419	-4.67679	0.737807	-6.33877	2.31602e-10	1.73122e-07
AT5G21940	593.782	-3.66035	0.577397	-6.33939	2.30676e-10	1.73122e-07
AT3G05640	459.047	2.42741	0.388586	6.24678	4.19012e-10	2.82722e-07
AT5G56550	81.6816	-3.27023	0.523462	-6.24731	4.17574e-10	2.82722e-07
AT4G27300	2387.19	-1.92691	0.310481	-6.20619	5.42846e-10	3.43384e-07
AT1G76990	3593.1	-1.56314	0.252497	-6.19072	5.98909e-10	3.5733e-07
AT3G62150	672.597	-2.40221	0.388055	-6.19038	6.00198e-10	3.5733e-07
AT5G05440	176.397	-2.99264	0.484758	-6.17347	6.68084e-10	3.86382e-07
AT1G78290	294.479	-1.13935	0.184733	-6.16758	6.93411e-10	3.8989e-07
AT1G21050	257.884	-1.51219	0.246939	-6.12372	9.14126e-10	4.86941e-07
AT3G05880	977.83	1.5123	0.249818	6.05362	1.4163e-09	7.35096e-07
AT4G39250	56.1565	-6.99446	1.167	-5.99354	2.05325e-09	1.03485e-06
AT1G08650	1029.7	1.40056	0.234629	5.96924	2.38367e-09	1.14882e-06
AT4G19430	212.053	-3.10436	0.524927	-5.91389	3.34118e-09	1.47026e-06
AT5G01740	80.0368	-2.15031	0.364805	-5.89442	3.75992e-09	1.61932e-06
AT1G14200	225.932	-1.16427	0.199297	-5.8419	5.16088e-09	2.17638e-06
AT2G43590	935.446	-2.02771	0.348671	-5.81555	6.04357e-09	2.44668e-06
AT1G12845	335.68	1.3461	0.232686	5.78505	7.24922e-09	2.87723e-06
AT4G01390	1118.21	-1.29621	0.225018	-5.76045	8.38904e-09	3.25146e-06
AT2G36970	449.356	-1.93363	0.336404	-5.74793	9.03416e-09	3.38647e-06
AT5G64120	367.577	-2.76674	0.482521	-5.73392	9.8136e-09	3.54727e-06
AT2G31110	485.871	-1.43645	0.250685	-5.73009	1.00377e-08	3.5646e-06
AT4G32480	176.561	-2.46165	0.429942	-5.72554	1.03107e-08	3.59842e-06
AT5G17460	425.917	2.24555	0.394234	5.69599	1.22661e-08	4.13818e-06
AT2G19190	79.4195	-4.66445	0.819778	-5.6899	1.27112e-08	4.21804e-06
AT3G18773	110.094	-1.7563	0.309111	-5.68178	1.33302e-08	4.35209e-06
AT1G75040	459.96	-2.06583	0.366252	-5.64045	1.69606e-08	5.44947e-06
AT3G24500	264.212	-1.22093	0.216641	-5.63574	1.74312e-08	5.51317e-06
AT3G16530	3265.13	-4.19018	0.744338	-5.6294	1.80839e-08	5.63161e-06
AT2G40330	44.6859	-8.10874	1.44719	-5.60308	2.10576e-08	6.45831e-06
AT5G67190	143.889	-1.39573	0.25048	-5.57222	2.51507e-08	7.37827e-06
AT2G21650	402.173	-3.75363	0.677476	-5.54061	3.01419e-08	8.47407e-06
AT3G27250	446.637	2.2575	0.408246	5.52975	3.20679e-08	8.89202e-06
AT1G30250	19.5908	7.99527	1.44932	5.51656	3.45691e-08	9.45604e-06
AT1G29395	4953.49	1.0144	0.184732	5.49122	3.99163e-08	1.06314e-05
AT3G44860	1117.4	1.66576	0.304309	5.47391	4.40209e-08	1.15724e-05
AT5G18670	316.119	-1.65924	0.304463	-5.44972	5.04491e-08	1.28886e-05
AT5G37600	3830.81	-1.47596	0.270917	-5.44801	5.09379e-08	1.28886e-05
AT2G38310	825.664	-2.11564	0.389743	-5.4283	5.68937e-08	1.42178e-05
AT5G10170	430.31	-1.40024	0.258311	-5.42077	5.93422e-08	1.46489e-05
AT4G18270	792.885	1.20077	0.222146	5.40533	6.46891e-08	1.55885e-05
AT1G31690	519.815	1.57749	0.293202	5.38022	7.43968e-08	1.77169e-05
AT1G12940	42.1324	-4.89495	0.914459	-5.35283	8.65886e-08	1.99174e-05
AT3G63160	5456.39	1.34417	0.255925	5.25223	1.50268e-07	3.30623e-05
AT1G73540	214.828	-1.42338	0.271387	-5.24481	1.56441e-07	3.40262e-05
AT2G05380	9612.68	-1.38578	0.264312	-5.24297	1.58011e-07	3.40262e-05
AT1G16850	154.601	3.03715	0.580507	5.2319	1.6778e-07	3.57495e-05
AT2G02930	30.5713	-3.65911	0.704829	-5.19149	2.08621e-07	4.35352e-05
AT5G48485	286.845	-1.02428	0.197631	-5.18278	2.18605e-07	4.42501e-05
AT3G26510	1019.03	-1.89595	0.366219	-5.17708	2.25382e-07	4.51701e-05
AT3G15356	1660.72	-3.34454	0.648075	-5.16073	2.45988e-07	4.83427e-05
AT5G20830	910.717	1.56594	0.303816	5.15424	2.54665e-07	4.95666e-05
AT1G76680	2454.4	-1.24034	0.240818	-5.15054	2.59737e-07	5.00724e-05
AT1G69160	716.394	-1.13348	0.220964	-5.12972	2.9017e-07	5.48937e-05
AT1G26945	267.163	1.12763	0.220078	5.12378	2.9947e-07	5.61284e-05
AT3G23550	644.973	-5.50002	1.07466	-5.11794	3.08896e-07	5.7364e-05
AT1G01340	99.1251	-2.17742	0.427148	-5.09759	3.44002e-07	6.1416e-05
AT4G11290	248.861	-2.0048	0.393142	-5.09944	3.40657e-07	6.1416e-05
AT1G65486	136.622	-1.70452	0.33564	-5.07843	3.80557e-07	6.69846e-05
AT2G36950	572.307	-1.11985	0.2217	-5.05117	4.3911e-07	7.51875e-05
AT1G14300	225.522	-1.08469	0.215376	-5.03629	4.74651e-07	8.00657e-05
AT5G48540	243.001	-1.82432	0.362414	-5.0338	4.80847e-07	8.03526e-05
AT1G02920	1840.55	-3.1912	0.63567	-5.02021	5.16152e-07	8.49427e-05
AT1G13920	206.407	1.27828	0.256125	4.99085	6.01154e-07	9.43299e-05
AT1G27020	752.683	-4.02176	0.805406	-4.99346	5.9308e-07	9.43299e-05
AT4G21870	100.291	-3.07182	0.616145	-4.98555	6.17856e-07	9.62049e-05
AT4G21380	819.687	1.41815	0.284855	4.97848	6.40845e-07	9.84631e-05
AT1G21110	99.7662	-3.10048	0.624577	-4.96412	6.90134e-07	0.000104251
AT1G23090	495.353	-1.45842	0.294678	-4.94919	7.45241e-07	0.000109288
AT3G04720	3873.04	-3.05622	0.61769	-4.94783	7.50472e-07	0.000109288
AT1G09350	380.136	1.76868	0.358638	4.93164	8.15422e-07	0.000117898
AT3G51910	48.8575	-2.19943	0.446816	-4.92245	8.54674e-07	0.000121833
AT1G16390	226.453	-1.82714	0.371676	-4.91595	8.83518e-07	0.000125064
AT4G11460	16.0357	-6.76254	1.37877	-4.90477	9.35384e-07	0.00013133
AT5G02940	3522.78	1.16303	0.2376	4.89491	9.83531e-07	0.00013636
AT2G39570	1145.3	-1.1107	0.228802	-4.8544	1.20754e-06	0.000165155
AT1G78460	2358.74	-1.77686	0.366925	-4.84257	1.28173e-06	0.000174126
AT2G39200	50.2607	-2.88123	0.595958	-4.83463	1.33396e-06	0.000177644
AT3G47860	976.27	1.07469	0.223347	4.81176	1.49609e-06	0.000197934
AT4G36410	97.3297	-2.79765	0.582137	-4.80582	1.54118e-06	0.000202575
AT5G48250	90.2636	1.36405	0.284644	4.79214	1.65011e-06	0.000214113
AT2G26695	117.753	-1.87519	0.392865	-4.77311	1.81404e-06	0.000232404
AT1G32920	216.869	-2.00281	0.422012	-4.74586	2.07624e-06	0.00025576
AT1G25560	947.993	-1.75418	0.371168	-4.72609	2.28882e-06	0.000277307
AT1G10990	108.75	-2.21828	0.469944	-4.72031	2.35488e-06	0.000282056
AT2G03710	134.866	1.06056	0.225039	4.71277	2.44375e-06	0.000289277
AT5G44572	64.1812	-1.87222	0.397605	-4.70873	2.49267e-06	0.000291657
AT5G62720	1287.86	1.10129	0.233827	4.70988	2.47864e-06	0.000291657
AT4G19370	48.3452	-2.09153	0.444661	-4.70366	2.55542e-06	0.000297281
AT3G16150	41.4645	-2.66283	0.567428	-4.69281	2.69475e-06	0.000311698
AT1G06160	209.865	-3.42044	0.731446	-4.67627	2.92139e-06	0.000332218
AT2G02010	122.545	-1.57974	0.338113	-4.67223	2.97953e-06	0.000336936
AT1G26800	276.332	-1.72821	0.372266	-4.6424	3.44385e-06	0.000375074
AT1G27730	150.351	-3.04226	0.655034	-4.64443	3.41018e-06	0.000375074
AT2G47560	37.9181	-1.96913	0.424177	-4.64224	3.44648e-06	0.000375074
AT5G61600	198.513	-2.39432	0.515749	-4.64241	3.44365e-06	0.000375074
ATCG00180	172.585	1.44542	0.313845	4.60554	4.11391e-06	0.000425125
AT4G23200	133.645	-1.44063	0.314128	-4.58612	4.51561e-06	0.000463985
AT1G44800	408.555	-1.30851	0.285399	-4.58482	4.54374e-06	0.000464517
AT3G26200	452.627	-3.85672	0.842404	-4.57823	4.6892e-06	0.000476979
AT4G17680	241.105	-1.07307	0.234662	-4.57285	4.81132e-06	0.000482133
AT1G68840	1912.9	-2.16501	0.476116	-4.54724	5.43548e-06	0.000539339
AT3G52480	70.7188	-2.0299	0.447042	-4.54074	5.60566e-06	0.000553511
AT4G18440	4659.36	1.36821	0.301948	4.53128	5.86263e-06	0.000576075
AT2G04170	254.516	1.12956	0.249364	4.52976	5.90517e-06	0.000577451
AT3G29575	220.581	1.93919	0.428339	4.52724	5.97577e-06	0.000581546
AT5G27420	250.387	-2.39333	0.53048	-4.51162	6.43343e-06	0.000614272
AT1G60750	8.89204	18.8438	4.18391	4.50387	6.67278e-06	0.000633275
AT4G19820	38.4202	-1.55271	0.344805	-4.50316	6.69503e-06	0.000633275
AT5G22300	538.322	-1.513	0.336279	-4.49924	6.81959e-06	0.00063737
AT4G04330	649.617	1.7176	0.381874	4.49782	6.86531e-06	0.000637466
AT1G72920	96.3268	-1.76248	0.393513	-4.47884	7.505e-06	0.000685638
AT5G61440	69.2776	-2.40378	0.537356	-4.47335	7.70045e-06	0.00069898
AT3G59570	174.968	1.06317	0.23796	4.46784	7.90135e-06	0.000707696
AT5G46780	289.665	-1.34824	0.301834	-4.46684	7.93816e-06	0.00070786
AT1G28660	390.295	-1.28039	0.287881	-4.44763	8.68222e-06	0.000767448
AT1G26420	81.1255	-4.70228	1.05818	-4.44372	8.84166e-06	0.000777685
AT3G22060	449.651	-1.5427	0.347372	-4.44105	8.95208e-06	0.000781069
AT3G10120	177.444	-1.36689	0.308239	-4.4345	9.22848e-06	0.000799396
AT3G51660	421.891	1.01485	0.228868	4.43421	9.24112e-06	0.000799396
AT1G28010	120.301	-1.35807	0.308166	-4.40692	1.04849e-05	0.000899303
AT2G40130	534.76	1.54118	0.350016	4.40318	1.06677e-05	0.000911119
AT1G26380	155.672	-5.53119	1.25891	-4.39365	1.11462e-05	0.000940092
AT5G62210	117.137	1.1716	0.266637	4.39398	1.11294e-05	0.000940092
AT1G70640	23.8786	2.78567	0.634509	4.39028	1.13206e-05	0.000950838
AT5G47230	90.3639	-2.09038	0.476425	-4.38764	1.14587e-05	0.00095846
AT4G30460	187.834	1.47358	0.336455	4.37971	1.18838e-05	0.000977856
AT5G51190	51.6472	-2.84975	0.651069	-4.37703	1.20306e-05	0.000985928
AT1G48100	316.571	1.3123	0.300425	4.36815	1.25306e-05	0.00100967
AT4G27520	5382.7	1.0453	0.239335	4.36753	1.25657e-05	0.00100967
AT1G20450	4799.83	1.10741	0.253899	4.36162	1.29103e-05	0.00102886
AT1G21890	17.2428	-4.04612	0.932722	-4.33797	1.43803e-05	0.00113263
AT5G24470	217.352	2.00748	0.462723	4.3384	1.43522e-05	0.00113263
AT1G48330	152.836	1.07774	0.249412	4.32111	1.55244e-05	0.00121801
AT1G79450	31.1015	2.15574	0.500901	4.30373	1.67949e-05	0.00128288
AT3G54580	36.5979	22.4418	5.22107	4.29832	1.72101e-05	0.00130475
AT2G39705	106.545	-1.44187	0.336602	-4.28361	1.83886e-05	0.00138373
AT3G16770	2766.64	-1.2067	0.282033	-4.27859	1.88084e-05	0.00140487
AT2G40000	692.094	-2.45766	0.575464	-4.27074	1.94821e-05	0.00144984
AT1G13260	1011.53	-1.41702	0.332025	-4.2678	1.97409e-05	0.00146372
AT5G39850	287.006	-1.24319	0.292092	-4.25617	2.07957e-05	0.00152517
AT3G28550	29.8894	22.0134	5.18039	4.24937	2.14371e-05	0.0015609
AT2G29660	142.299	-1.15784	0.272772	-4.24471	2.18875e-05	0.00158798
AT1G02205	1761.43	2.06989	0.488531	4.23697	2.26559e-05	0.00163786
AT1G64110	63.5638	3.25208	0.768311	4.23277	2.30832e-05	0.00164525
AT3G16420	4124.14	-1.37779	0.326021	-4.22608	2.37798e-05	0.00168305
AT4G36040	5185.75	-1.28422	0.304608	-4.21599	2.48683e-05	0.00175395
AT4G21215	551.554	1.06085	0.252283	4.20499	2.61096e-05	0.00182245
AT2G18196	47.7932	-2.32513	0.554495	-4.19324	2.74995e-05	0.00188693
AT5G66400	586.849	1.53965	0.367292	4.19189	2.76634e-05	0.00189177
AT1G31173	372.608	1.32832	0.317398	4.18502	2.85143e-05	0.00193039
AT1G13245	1071.94	-1.36054	0.326038	-4.17294	3.007e-05	0.00198914
AT1G53035	66.5702	1.20579	0.289086	4.17103	3.03222e-05	0.00199312
ATCG00170	113.194	1.61512	0.388101	4.1616	3.1602e-05	0.00207018
AT2G26020	192.675	-6.9415	1.66852	-4.16027	3.17877e-05	0.00207563
AT4G15430	76.1485	-1.22098	0.294139	-4.15104	3.30964e-05	0.00213356
AT4G33550	210.063	2.3892	0.575526	4.15133	3.30544e-05	0.00213356
AT5G38900	65.0681	-3.51699	0.847456	-4.15005	3.32399e-05	0.00213601
AT2G39920	256.217	1.57342	0.379274	4.14851	3.34647e-05	0.00213787
AT1G64380	49.3019	2.01657	0.486495	4.1451	3.3966e-05	0.00215529
AT4G21120	34.5632	-2.87181	0.693627	-4.14028	3.46883e-05	0.00219425
AT4G27280	207.158	-1.83358	0.442973	-4.13926	3.48425e-05	0.00219714
AT4G23210	30.6045	-2.649	0.640499	-4.13583	3.53671e-05	0.00221604
AT3G28007	144.682	1.90206	0.461262	4.12361	3.72988e-05	0.00231596
AT4G35770	1146.26	-2.60913	0.633452	-4.1189	3.80684e-05	0.00234933
AT5G08350	66.5191	-1.94579	0.47267	-4.11659	3.84525e-05	0.00235865
AT3G26840	255.813	-1.04535	0.254424	-4.10867	3.97944e-05	0.00243359
AT3G48250	110.74	-1.04997	0.256308	-4.09651	4.19428e-05	0.00253435
AT1G18265	58.1684	1.42331	0.347737	4.09306	4.25723e-05	0.00254955
AT2G25470	13.9561	-5.26923	1.28724	-4.09342	4.25049e-05	0.00254955
AT4G36010	257.983	1.27709	0.311923	4.09426	4.23511e-05	0.00254955
AT4G04955	707.844	-1.39442	0.341013	-4.08906	4.33122e-05	0.0025786
AT4G17460	503.361	-1.05072	0.257439	-4.08144	4.47575e-05	0.00262927
AT1G51800	163.997	-3.36092	0.827737	-4.06038	4.89939e-05	0.00282545
AT5G20960	429.603	-1.54277	0.38091	-4.05021	5.11715e-05	0.00290959
AT5G40990	20.8388	-6.61008	1.63318	-4.04737	5.17959e-05	0.00293684
AT1G05675	48.1981	-2.66713	0.660755	-4.03649	5.42558e-05	0.00304223
AT1G52342	137.791	-1.13136	0.281448	-4.01979	5.82505e-05	0.00320415
AT3G49340	8.99726	-6.75748	1.68082	-4.02033	5.81157e-05	0.00320415
AT4G36230	45.8069	1.63586	0.406788	4.02141	5.78514e-05	0.00320415
AT1G15125	3563.79	-3.62592	0.90481	-4.00738	6.13952e-05	0.00333492
AT1G67810	247.464	-1.63187	0.409425	-3.98577	6.72625e-05	0.00357356
AT3G59880	35.3737	-1.87568	0.472832	-3.96691	7.28116e-05	0.00382819
AT5G52250	42.893	-2.05074	0.518782	-3.95299	7.71792e-05	0.00399555
AT3G02140	27.0494	-2.43984	0.61777	-3.94944	7.83347e-05	0.00402678
AT1G02390	114.072	1.19403	0.302609	3.94577	7.95438e-05	0.0040597
AT5G61160	303.118	-5.42773	1.38035	-3.93214	8.41931e-05	0.00422888
AT1G71400	27.9874	-2.35544	0.600336	-3.92354	8.72564e-05	0.00433967
AT5G52640	298.106	-1.55384	0.396953	-3.91441	9.06247e-05	0.00446734
AT2G17710	314.424	-1.24432	0.318006	-3.91289	9.11972e-05	0.00448062
AT2G22800	91.8716	-1.16802	0.299648	-3.89796	9.70071e-05	0.00469765
AT5G13580	18.4714	4.45028	1.14218	3.89632	9.76666e-05	0.00470167
AT1G21120	93.985	-2.48571	0.639716	-3.88565	0.000102058	0.00484168
AT4G16590	31.9462	4.76145	1.22631	3.88274	0.000103287	0.00487352
AT5G44575	35.6855	-2.81204	0.725005	-3.87865	0.000105038	0.0049446
AT2G20560	176.022	-1.0453	0.269611	-3.87708	0.000105717	0.00495353
AT5G59320	1318.78	3.65259	0.944965	3.86532	0.000110945	0.00515636
AT2G28160	74.3614	1.32359	0.342752	3.86166	0.000112619	0.00521655
AT5G57220	242.226	-3.02729	0.785715	-3.85291	0.000116722	0.00535756
AT5G55950	62.292	1.48084	0.384479	3.85154	0.000117377	0.00536332
AT1G77660	216.662	-1.25995	0.32845	-3.83603	0.000125039	0.00566114
AT2G26650	340.225	-1.36104	0.354902	-3.83498	0.000125573	0.00566114
AT3G12580	1012.91	-2.14317	0.55881	-3.83524	0.000125442	0.00566114
AT5G04310	36.9729	-1.43315	0.374168	-3.83024	0.000128018	0.00575855
AT4G01130	252.02	1.0326	0.27	3.82446	0.000131057	0.00586917
AT1G54540	5.86304	6.04973	1.58373	3.81993	0.00013349	0.00596239
AT3G55980	519.43	-1.28343	0.336022	-3.81949	0.000133728	0.00596239
AT5G19120	476.386	-2.19846	0.575836	-3.81787	0.000134611	0.00598857
AT4G01985	44.1124	2.79062	0.731507	3.8149	0.00013624	0.00604174
AT1G51820	13.1521	-4.90133	1.2854	-3.81308	0.000137245	0.00605254
AT3G26830	337.967	-4.24472	1.11456	-3.80844	0.000139848	0.00614058
AT2G22770	74.3902	-1.22515	0.322044	-3.8043	0.000142208	0.0062172
AT1G20030	237.608	1.23452	0.324588	3.80333	0.000142765	0.00622813
AT2G40670	62.2514	1.28573	0.339455	3.78762	0.000152099	0.00652286
AT4G20970	18.4411	2.38622	0.630143	3.78679	0.000152608	0.00653087
AT4G20000	15.4212	-5.80117	1.53533	-3.77844	0.000157812	0.00669693
AT5G58650	84.0111	-1.24155	0.328772	-3.77633	0.000159153	0.00672564
AT4G36850	257.001	-1.59685	0.423461	-3.77095	0.00016263	0.00681456
AT1G06090	22.4662	1.68593	0.447327	3.7689	0.000163967	0.00682928
AT4G39780	173.425	-1.00414	0.266465	-3.76838	0.000164308	0.0068294
AT1G80840	98.6957	-2.84908	0.756501	-3.76613	0.000165794	0.00687707
AT5G56840	182.235	-1.45685	0.387559	-3.75905	0.00017056	0.0070603
AT1G78070	2513.35	1.0813	0.287823	3.75681	0.000172092	0.00706646
AT4G25433	6.88636	5.80419	1.54499	3.75679	0.000172106	0.00706646
AT5G05500	3.89014	19.6186	5.22197	3.75694	0.000172	0.00706646
AT5G46600	86.8502	1.3394	0.356466	3.75744	0.000171658	0.00706646
AT5G04150	115.999	-3.42405	0.912723	-3.75147	0.000175801	0.00718902
AT3G59940	3622.96	-1.05567	0.281892	-3.74493	0.000180445	0.00731977
AT2G28500	49.4823	1.76866	0.472379	3.74416	0.000180999	0.00732757
AT1G65900	311.465	1.03511	0.276824	3.73923	0.000184582	0.00744286
AT2G16990	341.796	1.08019	0.289328	3.73345	0.000188875	0.00758575
AT3G62780	33.5413	2.02535	0.542662	3.73224	0.000189781	0.00760702
AT1G19510	26.2038	-2.10822	0.565105	-3.73066	0.000190976	0.00763978
AT3G26500	61.742	-2.86626	0.768787	-3.72829	0.000192786	0.00769698
AT4G26950	66.2477	-1.67388	0.449524	-3.72368	0.000196342	0.00777761
AT5G05790	93.4033	-1.15743	0.310961	-3.72211	0.000197563	0.00781069
AT4G20860	151.738	-1.52349	0.409967	-3.71613	0.000202301	0.00798239
AT3G46490	354.675	-1.29038	0.347929	-3.70875	0.000208288	0.00818674
AT5G19230	98.4799	-1.87281	0.505165	-3.70732	0.000209466	0.00820119
AT5G50950	6427.62	1.10563	0.29852	3.7037	0.000212474	0.0082869
AT1G19380	107.423	-1.51016	0.408753	-3.69455	0.000220273	0.0085417
AT1G33440	37.0058	1.62054	0.43887	3.69254	0.000222028	0.00858517
AT1G52750	84.1456	-1.27665	0.345988	-3.68986	0.000224376	0.00859761
AT3G06500	1241.57	1.00579	0.27277	3.68732	0.000226625	0.00865537
AT5G52300	49.1625	2.80965	0.762182	3.68633	0.000227512	0.00867287
AT1G60730	491.065	-1.3188	0.358571	-3.67792	0.000235145	0.00883743
AT5G19190	939.45	-1.01925	0.277062	-3.67878	0.000234356	0.00883743
AT4G06746	65.1785	-2.55213	0.695809	-3.66787	0.000244584	0.00913919
AT1G19020	77.7924	-2.84733	0.777093	-3.66408	0.000248228	0.00923646
AT1G07050	14.6435	2.83033	0.775199	3.6511	0.00026112	0.00959272
AT2G05440	252.099	2.92303	0.802411	3.64281	0.000269681	0.00985358
AT1G77760	433.034	1.48471	0.408067	3.63839	0.000274348	0.010006
AT2G47750	210.133	1.03018	0.283408	3.63496	0.000278026	0.0101219
AT5G25130	123.311	1.04922	0.28941	3.62537	0.00028855	0.0104477
AT5G02160	7007.33	1.06449	0.29377	3.62356	0.000290578	0.0104846
AT2G30750	152.538	-4.88045	1.34793	-3.6207	0.000293806	0.0105634
AT1G69520	68.2371	-1.35842	0.375431	-3.6183	0.000296546	0.0106252
AT3G18250	18.9238	-4.12066	1.13899	-3.61782	0.000297098	0.0106252
AT4G17500	148.71	-1.9144	0.529155	-3.61785	0.000297062	0.0106252
AT1G20070	173.945	1.10196	0.304728	3.61622	0.000298935	0.0106646
AT1G55850	1571.22	-1.15774	0.320481	-3.61251	0.000303251	0.0107503
AT2G43050	100.831	-1.86261	0.516217	-3.60819	0.000308338	0.0108735
AT3G02840	10.0746	-5.71579	1.58726	-3.60105	0.000316933	0.0111329
AT1G29860	7.75501	-4.1012	1.13952	-3.59905	0.000319384	0.0111801
AT1G22900	83.5363	-1.2657	0.352481	-3.59084	0.000329615	0.0113521
AT1G24575	103.167	-1.44107	0.401431	-3.58984	0.000330883	0.0113521
AT1G69260	97.4909	2.17605	0.605901	3.59143	0.000328866	0.0113521
AT5G61590	1671.95	-1.32116	0.367785	-3.5922	0.000327895	0.0113521
AT1G68620	74.3221	-2.58135	0.720701	-3.58172	0.000341343	0.0116257
AT2G20750	394.953	1.03908	0.290244	3.58001	0.000343581	0.0116691
AT3G61990	300.663	-1.20106	0.336201	-3.57244	0.000353667	0.011873
AT4G15760	1342.91	-1.10043	0.308109	-3.57156	0.000354864	0.011873
AT5G42880	83.7204	-1.07068	0.300116	-3.56756	0.000360323	0.0120357
AT1G23020	1693.55	-1.27535	0.357877	-3.56366	0.000365724	0.012176
AT2G34960	106.987	-1.6122	0.452688	-3.5614	0.000368882	0.012225
AT5G57625	4.123	18.5982	5.22229	3.56131	0.000369009	0.012225
AT1G72940	180.106	-1.07887	0.303736	-3.55199	0.000382331	0.0125432
AT5G02580	20.0835	-4.64837	1.31061	-3.54671	0.000390074	0.012674
AT1G78430	70.5248	1.03954	0.29446	3.53032	0.000415061	0.013231
AT3G30775	488.959	-2.30239	0.653287	-3.52432	0.000424577	0.0134496
AT1G52270	74.6227	-1.58494	0.450353	-3.51932	0.000432649	0.0136839
AT1G64170	199.512	-1.20754	0.343315	-3.51728	0.000435989	0.0137252
AT1G80440	1520.52	-2.06973	0.590182	-3.50693	0.000453302	0.0141403
AT5G60900	568.667	1.33074	0.379691	3.50479	0.000456971	0.0142148
AT1G17710	11.2389	-4.82417	1.377	-3.50339	0.000459383	0.014262
AT2G47880	328.603	-1.47257	0.421448	-3.49407	0.00047572	0.0146085
AT3G55580	77.9232	1.34971	0.386369	3.49333	0.000477038	0.0146085
AT3G11020	35.8797	1.73532	0.496941	3.49201	0.000479403	0.0146587
AT1G15670	185.63	-1.82739	0.524382	-3.48484	0.000492428	0.0149666
AT3G62960	11.4839	-4.8463	1.39065	-3.48492	0.000492279	0.0149666
AT5G18600	425.362	1.14311	0.328184	3.48314	0.000495576	0.0149806
AT1G26410	33.2039	-6.05865	1.74273	-3.47652	0.000507958	0.0152102
AT2G37430	10.867	-5.38626	1.54973	-3.47561	0.000509698	0.0152173
AT2G15620	3278.39	1.04717	0.301571	3.47237	0.000515886	0.0153567
AT1G19940	89.1097	1.14199	0.329449	3.46638	0.000527521	0.0156341
AT3G55940	128.541	1.05708	0.305387	3.46145	0.000537279	0.0158536
AT5G54470	151.727	1.24462	0.359533	3.46178	0.000536616	0.0158536
AT1G09970	2843.27	-1.11343	0.322116	-3.45662	0.000547	0.0160702
AT4G22690	4321.61	-1.07096	0.310135	-3.45319	0.000553997	0.0162287
AT5G46730	103.747	1.25344	0.363118	3.45188	0.000556699	0.0162842
AT1G66090	61.1199	-1.70717	0.494888	-3.4496	0.000561421	0.016375
AT2G24980	3.72891	17.8503	5.191	3.4387	0.000584513	0.0167826
AT3G15518	26.803	-2.51964	0.733053	-3.43719	0.000587787	0.0168288
AT1G21100	289.91	-2.70714	0.788342	-3.43397	0.000594816	0.0169105
AT5G65600	23.4729	-4.64643	1.35387	-3.43195	0.00059925	0.0169888
AT1G25400	89.964	-2.01991	0.589141	-3.42857	0.000606773	0.0171063
AT4G19970	65.6858	-1.17642	0.344036	-3.41948	0.000627416	0.0175659
AT5G03350	2632.05	1.99361	0.584082	3.41324	0.000641948	0.0177333
AT4G19230	94.5091	1.24093	0.36385	3.41057	0.000648279	0.0178227
AT4G21850	57.5057	-2.03657	0.597182	-3.4103	0.000648915	0.0178227
AT1G36622	15.3927	-4.73203	1.38847	-3.40809	0.000654197	0.0178901
AT1G04980	156.476	-1.15064	0.33777	-3.40658	0.000657814	0.0179212
AT1G31350	103.254	1.09542	0.321593	3.40622	0.000658699	0.0179212
AT4G28290	59.1592	-1.29461	0.379995	-3.40693	0.000656985	0.0179212
AT1G24470	36.4469	1.42348	0.418132	3.40437	0.000663158	0.0179942
AT1G12040	4.25798	17.6863	5.19964	3.40144	0.000670316	0.0181458
AT2G17740	26.2042	-4.39142	1.29162	-3.39994	0.000674005	0.0181521
AT5G15330	126.558	-1.01531	0.298906	-3.39674	0.000681935	0.0183073
AT1G46480	101.15	1.0144	0.298764	3.39532	0.000685477	0.018378
AT1G47655	31.0754	-1.44945	0.427612	-3.38965	0.000699825	0.0186638
AT5G66150	4.6888	5.51831	1.63037	3.38469	0.00071258	0.0189292
AT1G65484	12.9716	-2.50512	0.741531	-3.37831	0.00072934	0.0193237
AT4G31877	48.3435	-1.38936	0.412268	-3.37003	0.000751593	0.0197291
AT1G57990	641.202	-1.43155	0.425034	-3.36808	0.000756936	0.0197757
AT2G43000	55.8989	-2.1727	0.645214	-3.36741	0.000758788	0.0197757
AT2G45600	344.819	1.00724	0.299091	3.36766	0.000758088	0.0197757
AT5G16570	216.898	-1.7426	0.517429	-3.36781	0.000757675	0.0197757
AT4G23600	9402.1	1.05023	0.311945	3.36673	0.000760661	0.0197909
AT5G46830	151.934	1.62755	0.48426	3.3609	0.000776876	0.0201609
AT2G29720	216.841	-1.00953	0.301036	-3.35353	0.000797891	0.0206007
AT2G36800	221.222	-1.23045	0.36696	-3.35308	0.000799165	0.0206073
AT2G40750	609.539	1.85762	0.554267	3.35149	0.000803789	0.0206572
AT4G16740	8.8752	6.08149	1.81905	3.34322	0.000828123	0.021054
AT5G42900	5.36305	5.75861	1.72942	3.32979	0.000869118	0.0217731
AT2G46680	726.727	1.32535	0.398763	3.32366	0.000888442	0.0220932
AT4G23280	17.7139	-3.69565	1.11306	-3.32027	0.000899308	0.0222813
AT2G36690	29.6236	-3.50402	1.05882	-3.30936	0.000935086	0.0228599
AT2G39800	12652.5	2.05612	0.621803	3.30671	0.000944001	0.0228726
AT3G19030	206.017	-1.40816	0.425852	-3.30668	0.000944095	0.0228726
AT3G23880	89.454	-1.23558	0.373594	-3.30729	0.000942044	0.0228726
AT4G23810	110.821	-1.62836	0.492419	-3.30686	0.000943488	0.0228726
AT1G19200	23.946	1.6757	0.507984	3.29872	0.000971255	0.0234049
AT3G28290	8.86062	4.87533	1.47939	3.29551	0.00098244	0.0235902
AT1G18870	406.783	1.31546	0.400024	3.28846	0.00100739	0.0238777
AT3G19970	216.576	-1.18574	0.360526	-3.2889	0.00100579	0.0238777
AT4G17490	74.8229	-1.93964	0.590091	-3.28702	0.00101253	0.023883
AT3G09260	4418.4	-1.10264	0.336011	-3.28157	0.00103231	0.0241695
AT5G10410	117.654	1.23853	0.377436	3.28143	0.00103283	0.0241695
AT2G43375	81.5708	-1.28922	0.393011	-3.28037	0.0010367	0.024232
AT2G26040	43.5822	-1.18918	0.363041	-3.2756	0.00105439	0.0245039
AT5G39240	6.10455	2.89035	0.882579	3.27489	0.00105703	0.0245372
AT3G05320	61.1938	-1.41863	0.434511	-3.2649	0.00109503	0.025361
AT5G02780	12.0231	-5.93307	1.82639	-3.24853	0.00116005	0.0264428
AT2G38210	89.3638	-1.53588	0.473919	-3.24081	0.00119189	0.0269568
AT5G49120	45.8561	1.56537	0.483628	3.23673	0.00120907	0.0272843
AT4G12500	75.2399	-5.79485	1.79088	-3.23575	0.00121322	0.0272867
AT3G14780	23.2765	-1.57929	0.488545	-3.23264	0.00122653	0.0275248
AT4G01670	62.4764	1.09434	0.339578	3.22265	0.00127009	0.02819
AT2G24550	415.021	-1.16758	0.362597	-3.22004	0.00128171	0.0283856
AT3G24420	53.2548	2.12418	0.660047	3.21822	0.00128987	0.028504
AT1G49000	25.5736	-3.16071	0.982287	-3.2177	0.00129222	0.0285248
AT2G43620	218.12	-2.76101	0.858221	-3.21714	0.00129478	0.02855
AT5G44585	5.40751	-5.02406	1.5634	-3.21354	0.0013111	0.0288157
AT5G15970	8272.46	1.64671	0.512479	3.21322	0.00131256	0.0288164
AT1G68850	12.5417	3.09996	0.965042	3.21225	0.00131698	0.0288509
AT2G38940	126.047	-1.23964	0.386039	-3.21117	0.00132194	0.0288582
AT4G12470	235.019	-2.29295	0.714156	-3.21071	0.00132408	0.0288582
AT1G02450	21.8127	2.4535	0.764607	3.20883	0.00133275	0.0290081
AT4G25480	261.392	2.82787	0.882523	3.2043	0.00135392	0.0293112
AT3G21351	11.7049	-3.12265	0.976342	-3.19832	0.00138232	0.029593
AT5G52310	9041.65	2.31406	0.723865	3.19682	0.00138953	0.0296081
AT1G13670	16.9574	-2.0635	0.645699	-3.19577	0.0013946	0.029684
AT4G36570	165.301	-2.00764	0.62853	-3.19418	0.00140229	0.0297851
AT3G28220	1976.75	2.08012	0.653592	3.1826	0.00145957	0.0308077
AT4G23450	39.7694	1.21722	0.383039	3.17781	0.00148393	0.0311917
AT2G42530	3044.44	1.52061	0.478919	3.17509	0.0014979	0.0313551
AT1G62975	67.3123	-1.16903	0.368335	-3.17382	0.00150448	0.0313708
AT2G24720	7.25804	16.5498	5.22587	3.16689	0.00154077	0.0319506
AT2G44840	11.9945	-3.2379	1.02538	-3.15775	0.00158991	0.032551
AT4G16260	585.196	-3.69396	1.16966	-3.15815	0.00158773	0.032551
AT2G30010	1013.58	-1.03747	0.328821	-3.15512	0.00160432	0.0327036
AT1G66920	232.822	-1.08068	0.342618	-3.15419	0.00160945	0.0327422
AT2G46830	1530.75	-1.0675	0.338722	-3.15155	0.00162405	0.0329069
AT3G48850	28.6766	-3.75738	1.1927	-3.15031	0.00163095	0.0330136
AT3G50740	3036.79	-1.01375	0.32194	-3.14887	0.00163901	0.0331107
AT1G78440	23.1939	2.27529	0.72385	3.14331	0.00167047	0.0335599
AT3G21080	11.5724	-2.92486	0.930928	-3.14187	0.0016787	0.0336106
AT3G51450	451.975	1.10008	0.350124	3.14198	0.0016781	0.0336106
AT3G44550	28.1216	2.69111	0.857448	3.13851	0.00169812	0.0339322
AT4G15990	17.7349	-2.45233	0.782887	-3.13242	0.00173371	0.0344656
AT5G49320	13.8009	-2.08306	0.665886	-3.12825	0.00175849	0.0347611
AT1G01250	164.103	1.21445	0.388737	3.12409	0.00178354	0.0350305
AT2G21188	62.0568	-1.45085	0.464382	-3.12427	0.00178247	0.0350305
AT5G18065	56.1211	-1.13126	0.362122	-3.12398	0.00178423	0.0350305
AT2G23540	41.9809	2.08836	0.669475	3.11939	0.00181224	0.0355114
AT4G01750	129.204	-1.34865	0.432444	-3.11868	0.00181666	0.0355293
AT3G13950	25.419	-3.73331	1.19792	-3.11648	0.00183022	0.0357255
AT3G06160	30.593	1.26837	0.407211	3.11477	0.00184091	0.0358649
AT4G17245	276.344	-1.35161	0.434191	-3.11294	0.00185235	0.0360532
AT4G26890	18.9939	1.51774	0.488318	3.10808	0.00188304	0.0364751
AT4G18250	206.521	-2.22615	0.719087	-3.0958	0.00196282	0.0377317
AT2G48140	18.0717	3.00255	0.970336	3.09434	0.00197251	0.0378101
AT4G39230	131.808	-1.0203	0.330091	-3.09096	0.00199511	0.0381351
AT4G21390	66.1173	-2.19224	0.709529	-3.08971	0.00200351	0.0381652
AT3G28300	7.4321	4.80475	1.55679	3.08631	0.00202656	0.0384818
AT3G05690	1521.66	-1.07641	0.349368	-3.08103	0.00206287	0.0388795
AT2G26010	574.542	-3.90889	1.27128	-3.07477	0.00210668	0.0394678
AT3G49110	977.861	-1.5657	0.509175	-3.07498	0.00210515	0.0394678
AT1G65500	79.639	-1.98947	0.647483	-3.07263	0.00212184	0.0396586
AT4G38000	6.25398	5.16696	1.68244	3.07111	0.00213267	0.0397876
AT4G37290	8.51055	-5.91748	1.92837	-3.06864	0.00215038	0.0399706
AT2G27830	489.388	-1.17705	0.383624	-3.06825	0.00215317	0.0399857
AT5G59220	192.662	1.78202	0.581343	3.06536	0.0021741	0.0402595
AT3G04420	20.2691	-1.87326	0.611841	-3.06168	0.00220097	0.0405507
AT5G23190	16.0623	2.48062	0.810581	3.0603	0.00221118	0.0406256
AT5G38010	85.5505	-1.18614	0.387623	-3.06004	0.00221311	0.0406256
AT5G24510	7.73826	3.27062	1.07052	3.05518	0.00224923	0.0407916
AT5G41040	91.0649	1.01879	0.333411	3.05566	0.00224569	0.0407916
AT5G52390	13.0685	-5.19722	1.7008	-3.05574	0.00224505	0.0407916
AT5G44420	899.146	-5.52083	1.80836	-3.05294	0.0022661	0.0409191
AT3G03341	23.8598	2.1124	0.692715	3.04945	0.00229263	0.0411778
AT4G01720	115.571	-1.06901	0.351702	-3.03952	0.00236954	0.0420001
AT5G36740	9.67219	-2.3055	0.758786	-3.0384	0.00237835	0.0420827
AT1G36940	77.6772	-1.16487	0.383575	-3.03688	0.00239041	0.0422222
AT2G47670	39.9223	1.38097	0.455115	3.03433	0.00241073	0.0424699
AT1G76600	110.944	-1.19007	0.392409	-3.03274	0.00242346	0.0426572
AT4G37030	23.6807	-1.38628	0.457276	-3.03161	0.00243256	0.042743
AT3G29810	55.0068	-1.24233	0.410177	-3.02877	0.00245548	0.0430336
AT5G57123	27.0929	1.59081	0.525832	3.02532	0.00248371	0.0432939
AT1G12100	15.1227	2.08256	0.688709	3.02386	0.00249569	0.0434375
AT3G54420	65.6238	-1.43869	0.476255	-3.02083	0.00252079	0.0437397
AT4G37530	145.102	-1.03625	0.343047	-3.02073	0.0025217	0.0437397
AT5G46050	36.4581	-1.5484	0.512733	-3.01989	0.00252868	0.0438232
AT4G19460	32.0262	-1.53268	0.507964	-3.01729	0.00255044	0.044012
AT2G37870	188.151	3.43017	1.13713	3.0165	0.0025571	0.0440894
AT3G17890	49.9454	-1.0584	0.351001	-3.01538	0.00256655	0.0441395
AT3G27650	69.9023	-1.66381	0.552018	-3.01405	0.00257788	0.0442592
AT3G62040	44.989	-1.98994	0.660326	-3.01358	0.00258184	0.0442895
AT5G64190	16.6173	-3.3627	1.11954	-3.00363	0.0026678	0.0453257
AT4G31910	41.6306	-1.98062	0.661341	-2.99486	0.00274574	0.0461622
AT2G11810	113.493	-1.30344	0.435576	-2.99245	0.00276751	0.0462974
AT1G65450	146.575	1.0501	0.351261	2.98952	0.00279418	0.0465513
AT4G02850	192.13	1.5717	0.526104	2.98743	0.00281336	0.0467721
AT2G37720	11.604	2.42828	0.813772	2.98398	0.00284528	0.0470541
AT2G15390	212.122	-1.68495	0.565722	-2.97841	0.00289751	0.047568
AT2G25735	108.229	-3.49187	1.17377	-2.97491	0.00293073	0.0479389
AT3G09600	408.923	-1.16448	0.391547	-2.97406	0.00293886	0.0479746
AT1G53100	61.7363	1.97866	0.666282	2.9697	0.00298086	0.0485037
AT1G74930	52.6711	-1.55753	0.52439	-2.97016	0.00297641	0.0485037
AT1G16640	25.508	-1.32292	0.445653	-2.96851	0.00299252	0.0486543
AT2G18150	54.0842	1.70289	0.574044	2.96648	0.00301231	0.0487801
AT1G07430	222.919	2.44597	0.824721	2.96581	0.00301885	0.0488469
AT2G34940	23.3802	2.06417	0.697484	2.95945	0.0030819	0.0497083

## Sheet: +Fe
Gene ID	Base mean	log2 FC	SE	Statistic	P	adjusted P
AT4G30650	2418.08	2.24421	0.175807	12.7652	2.56405e-37	5.19016e-33
AT1G65845	131.097	-3.23903	0.307929	-10.5188	7.08028e-26	7.16596e-22
AT3G05650	603.382	1.63486	0.159072	10.2775	8.90401e-25	4.50587e-21
AT1G22690	655.523	-2.61103	0.269991	-9.6708	4.01248e-22	1.62441e-18
AT2G47890	681.136	1.18211	0.126124	9.37254	7.08051e-21	2.38873e-17
AT1G64890	358.776	1.31497	0.141248	9.30962	1.28292e-20	3.70983e-17
AT3G16670	1722.96	-3.41496	0.369331	-9.24634	2.32315e-20	5.87814e-17
AT1G18330	462.735	-1.03092	0.1151	-8.95672	3.34466e-19	7.5225e-16
AT2G30520	5542.39	-1.05225	0.119014	-8.84136	9.45608e-19	1.9141e-15
AT1G62380	5856.91	-1.39382	0.161034	-8.65548	4.90862e-18	9.03276e-15
AT2G21660	13777.1	1.02951	0.126673	8.12728	4.39015e-16	7.40546e-13
AT5G25110	192.85	2.41517	0.304276	7.93741	2.06451e-15	3.21461e-12
AT3G16770	2766.64	-2.15572	0.281939	-7.64605	2.07249e-14	2.99652e-11
AT2G41190	442.004	2.44161	0.320426	7.61987	2.53923e-14	3.4266e-11
AT3G50970	254.479	3.78598	0.500962	7.55741	4.11172e-14	5.20184e-11
AT2G12400	585.756	1.01889	0.138582	7.35225	1.94901e-13	2.07642e-10
AT2G37130	444.425	-1.94459	0.264253	-7.3588	1.85577e-13	2.07642e-10
AT5G62210	117.137	2.01192	0.280996	7.15997	8.06943e-13	8.16707e-10
AT4G39250	56.1565	-9.32113	1.31404	-7.09351	1.30753e-12	1.20305e-09
AT4G33220	2439.97	-1.14185	0.162776	-7.01485	2.30195e-12	2.02592e-09
AT3G27250	446.637	2.8828	0.411975	6.99753	2.60515e-12	2.19723e-09
AT3G16660	656.54	-2.02277	0.292869	-6.90673	4.95956e-12	4.01566e-09
AT5G17460	425.917	2.72957	0.396358	6.88662	5.7133e-12	4.44802e-09
AT2G21650	402.173	-4.62623	0.675607	-6.84752	7.51413e-12	5.43218e-09
AT1G68050	82.2296	2.4785	0.362734	6.83284	8.32488e-12	5.81076e-09
AT4G36010	257.983	2.16246	0.318732	6.78458	1.16423e-11	7.85542e-09
AT3G02380	557	-1.22773	0.181456	-6.76596	1.32431e-11	8.37708e-09
AT1G12110	2170.96	-1.30976	0.193892	-6.75513	1.42708e-11	8.75362e-09
AT4G22990	898.687	1.21446	0.182421	6.65746	2.78604e-11	1.61129e-08
AT4G35770	1146.26	-4.20499	0.634247	-6.62989	3.35941e-11	1.88892e-08
AT1G58360	1762.66	1.37388	0.20756	6.61918	3.61208e-11	1.9761e-08
AT2G38310	825.664	-2.55067	0.389436	-6.54964	5.76748e-11	2.99347e-08
AT4G30910	396.242	-1.01756	0.156171	-6.51566	7.23688e-11	3.66222e-08
AT3G11420	533.079	1.16833	0.180158	6.485	8.87315e-11	4.27644e-08
AT5G46830	151.934	3.29556	0.507993	6.48742	8.73194e-11	4.27644e-08
AT5G15960	109.024	3.6013	0.558669	6.44622	1.14672e-10	5.39814e-08
AT1G68440	434.475	-1.50545	0.233793	-6.43927	1.20053e-10	5.523e-08
AT4G22880	829.339	6.47882	1.01044	6.41191	1.43706e-10	6.46421e-08
AT4G33550	210.063	3.76384	0.591369	6.36463	1.95763e-10	8.29583e-08
AT5G05440	176.397	-3.05115	0.479448	-6.36388	1.9672e-10	8.29583e-08
AT1G54040	1627.48	1.4986	0.238763	6.27652	3.46238e-10	1.42036e-07
AT4G23200	133.645	-1.95361	0.311359	-6.27446	3.50844e-10	1.42036e-07
AT5G64120	367.577	-2.9737	0.478114	-6.21966	4.98245e-10	1.93951e-07
AT3G44860	1117.4	1.88572	0.304533	6.19218	5.93373e-10	2.22427e-07
AT4G16146	396.658	1.72184	0.278435	6.18397	6.25089e-10	2.30056e-07
AT5G19190	939.45	-1.71946	0.27827	-6.17909	6.44703e-10	2.33037e-07
AT3G51910	48.8575	-2.79094	0.454966	-6.13438	8.54925e-10	3.03604e-07
AT1G04990	558.73	1.08824	0.177969	6.11477	9.66938e-10	3.26213e-07
AT5G20250	623.63	-5.21591	0.852637	-6.11739	9.51216e-10	3.26213e-07
AT4G02520	9054.67	-2.11381	0.346191	-6.1059	1.02226e-09	3.39222e-07
AT1G55020	518.718	1.146	0.188087	6.09293	1.10865e-09	3.5621e-07
AT5G59320	1318.78	5.75478	0.949974	6.05783	1.3797e-09	4.2966e-07
AT1G04040	1169.2	-2.13544	0.353796	-6.03579	1.58188e-09	4.77917e-07
AT3G29590	231.111	6.19276	1.02647	6.03306	1.60886e-09	4.78921e-07
AT2G21590	612.906	1.59822	0.265507	6.01949	1.74968e-09	4.98832e-07
AT4G21880	138.018	-1.22067	0.202765	-6.02013	1.74278e-09	4.98832e-07
AT5G25390	143.964	2.31284	0.383956	6.02371	1.70464e-09	4.98832e-07
AT4G19380	224.665	-1.82482	0.303386	-6.01486	1.80041e-09	5.06166e-07
AT1G65450	146.575	2.11924	0.354168	5.98372	2.18095e-09	5.80878e-07
AT1G14430	142.804	-1.708	0.286266	-5.96648	2.42429e-09	6.29135e-07
AT1G35720	10041.9	1.20551	0.202128	5.96408	2.46022e-09	6.30376e-07
AT1G14210	261.346	-1.06284	0.178868	-5.94205	2.81477e-09	7.12208e-07
AT2G37580	193.023	1.41036	0.237893	5.92853	3.05654e-09	7.63833e-07
AT5G02940	3522.78	1.40447	0.237844	5.90499	3.52672e-09	8.70583e-07
AT1G76990	3593.1	-1.48769	0.252433	-5.8934	3.78323e-09	9.11669e-07
AT1G28670	921.566	-1.04324	0.17728	-5.88472	3.98724e-09	9.47301e-07
AT3G05640	459.047	2.29949	0.390859	5.88318	4.0247e-09	9.47301e-07
AT5G56870	189.018	-3.41103	0.579993	-5.88116	4.07403e-09	9.47892e-07
AT5G10170	430.31	-1.50904	0.258031	-5.84828	4.96683e-09	1.12982e-06
AT1G67300	849.112	1.18173	0.202353	5.83995	5.22153e-09	1.17438e-06
AT1G16390	226.453	-2.16508	0.372209	-5.81685	5.99658e-09	1.33388e-06
AT3G05660	528.336	1.34363	0.232504	5.77898	7.5156e-09	1.63582e-06
AT2G34850	72.8483	2.23423	0.386967	5.77369	7.75556e-09	1.67008e-06
AT4G21870	100.291	-3.53264	0.612205	-5.77036	7.9104e-09	1.6855e-06
AT4G23400	3899.55	-1.51296	0.262466	-5.76439	8.19532e-09	1.72802e-06
AT1G10990	108.75	-2.67963	0.465363	-5.75814	8.50464e-09	1.77475e-06
AT1G64110	63.5638	5.11858	0.891945	5.73867	9.54238e-09	1.97075e-06
AT2G06850	4247.92	-1.93617	0.337491	-5.73697	9.6386e-09	1.97075e-06
AT3G15630	175.809	-2.95676	0.517366	-5.71503	1.09688e-08	2.17677e-06
AT4G09820	130.997	3.79132	0.665222	5.69934	1.20275e-08	2.31867e-06
AT4G18270	792.885	1.27014	0.223019	5.69522	1.23216e-08	2.35296e-06
AT1G24070	706.993	3.09611	0.547107	5.65905	1.52215e-08	2.82672e-06
AT5G40450	5561.73	-1.83173	0.323935	-5.65463	1.56183e-08	2.84815e-06
AT5G42800	1278.25	6.38532	1.12897	5.65589	1.55045e-08	2.84815e-06
AT1G52750	84.1456	-1.95011	0.345166	-5.64977	1.60667e-08	2.90377e-06
AT4G17870	882.399	-1.19841	0.212508	-5.63936	1.70685e-08	3.05753e-06
AT3G22060	449.651	-1.9602	0.348247	-5.62875	1.8152e-08	3.2231e-06
AT1G23030	632.71	-1.34281	0.238993	-5.6186	1.92506e-08	3.38844e-06
AT3G22750	179.847	-1.12718	0.20103	-5.607	2.05865e-08	3.59234e-06
AT1G09350	380.136	2.00562	0.35853	5.59401	2.21887e-08	3.83883e-06
AT3G29575	220.581	2.42356	0.433672	5.58846	2.29093e-08	3.92991e-06
AT1G16850	154.601	3.26692	0.586292	5.57216	2.51593e-08	4.24395e-06
AT3G48510	28.2512	3.63735	0.654996	5.55325	2.80414e-08	4.69102e-06
AT3G11410	2199.88	1.25829	0.226691	5.55068	2.84563e-08	4.69916e-06
AT5G59220	192.662	3.2615	0.58765	5.55008	2.85544e-08	4.69916e-06
AT1G60750	8.89204	-22.9586	4.14052	-5.54486	2.94187e-08	4.7979e-06
AT2G47560	37.9181	-2.60927	0.471645	-5.53228	3.16097e-08	5.07812e-06
AT1G28010	120.301	-1.65923	0.301358	-5.50583	3.67428e-08	5.85628e-06
AT5G67480	860.956	1.03841	0.188656	5.50424	3.70759e-08	5.8632e-06
AT2G46680	726.727	2.20069	0.40039	5.49636	3.87711e-08	6.08375e-06
AT3G52180	4100.59	1.07784	0.196359	5.48912	4.03942e-08	6.24167e-06
AT3G62150	672.597	-2.11515	0.385993	-5.47976	4.25892e-08	6.53099e-06
AT1G23090	495.353	-1.60146	0.293463	-5.45713	4.83882e-08	7.28787e-06
AT4G17460	503.361	-1.41492	0.259317	-5.45634	4.8605e-08	7.28787e-06
AT1G28660	390.295	-1.57202	0.288438	-5.45011	5.03388e-08	7.49061e-06
AT5G65870	126.367	1.38438	0.254068	5.44885	5.06972e-08	7.49061e-06
AT2G25790	206.907	1.1649	0.214018	5.443	5.23902e-08	7.62937e-06
AT2G40130	534.76	1.9111	0.351745	5.43321	5.53501e-08	8.00284e-06
AT5G55950	62.292	2.28	0.420945	5.41637	6.08208e-08	8.73145e-06
AT5G23860	1259.8	-1.02504	0.189878	-5.39843	6.72253e-08	9.5159e-06
AT1G62570	373.115	1.97017	0.365525	5.38997	7.04684e-08	9.73338e-06
AT3G29670	212.761	-1.44601	0.268239	-5.39076	7.01608e-08	9.73338e-06
AT5G44572	64.1812	-2.18316	0.407484	-5.35767	8.43015e-08	1.13762e-05
AT4G18440	4659.36	1.61668	0.302012	5.35305	8.64846e-08	1.15935e-05
AT1G18710	416.286	1.79824	0.337111	5.33427	9.59319e-08	1.24772e-05
AT5G57050	494.795	1.475	0.276422	5.33606	9.49892e-08	1.24772e-05
AT1G20380	701.269	2.07467	0.389194	5.33069	9.78407e-08	1.26146e-05
AT3G06070	307.147	-2.33728	0.438883	-5.32552	1.00665e-07	1.28966e-05
AT3G25400	106.81	1.27919	0.240625	5.31614	1.05994e-07	1.34096e-05
AT4G23600	9402.1	1.65872	0.311986	5.31664	1.05699e-07	1.34096e-05
AT3G06080	953.422	-1.16803	0.219954	-5.31033	1.09426e-07	1.36728e-05
AT1G12845	335.68	1.2475	0.235324	5.30119	1.1505e-07	1.42002e-05
AT4G08870	3929.86	1.69609	0.320648	5.28957	1.22603e-07	1.47571e-05
AT4G19430	212.053	-2.77616	0.524911	-5.28883	1.23103e-07	1.47571e-05
AT5G17220	1010.2	6.15008	1.16237	5.29099	1.21654e-07	1.47571e-05
AT5G55930	752.221	-1.87724	0.355028	-5.28759	1.23936e-07	1.47571e-05
AT1G69260	97.4909	3.34021	0.632515	5.28084	1.2859e-07	1.52218e-05
AT1G66180	685.557	-1.13102	0.214565	-5.27119	1.35541e-07	1.5772e-05
AT3G05730	2514.96	-1.59204	0.30203	-5.27114	1.35576e-07	1.5772e-05
AT5G50400	2180.24	1.33686	0.253737	5.26869	1.37403e-07	1.58932e-05
AT1G77120	195.239	1.51026	0.286893	5.2642	1.40801e-07	1.61022e-05
AT2G22470	113.731	1.47369	0.281471	5.23566	1.64395e-07	1.85904e-05
AT2G22770	74.3902	-1.69868	0.325077	-5.22545	1.7373e-07	1.9429e-05
AT4G37610	80.6419	-3.76132	0.723449	-5.19915	2.00205e-07	2.21451e-05
AT3G03341	23.8598	6.04226	1.1628	5.19628	2.03314e-07	2.23667e-05
AT4G17245	276.344	-2.26079	0.436596	-5.17821	2.24024e-07	2.42497e-05
AT4G24010	320.14	1.37428	0.266269	5.16123	2.45332e-07	2.61368e-05
AT4G12470	235.019	-3.72161	0.72266	-5.14988	2.6066e-07	2.73382e-05
AT5G03380	881.871	-1.12831	0.219406	-5.14254	2.71043e-07	2.79371e-05
AT4G08570	113.703	4.78149	0.93267	5.12667	2.94917e-07	2.97e-05
AT4G36410	97.3297	-2.94865	0.575158	-5.12668	2.949e-07	2.97e-05
AT2G39570	1145.3	-1.171	0.228844	-5.11702	3.10395e-07	3.1104e-05
AT4G16590	31.9462	6.5804	1.28814	5.10846	3.248e-07	3.22284e-05
AT3G19620	369.889	1.39034	0.274852	5.05852	4.22524e-07	4.12761e-05
AT3G28220	1976.75	3.28132	0.654589	5.0128	5.36442e-07	5.02716e-05
AT1G21050	257.884	-1.23258	0.246043	-5.00961	5.45409e-07	5.08763e-05
AT5G44575	35.6855	-3.96911	0.79347	-5.00222	5.66728e-07	5.23822e-05
AT5G64570	310.57	-1.44028	0.288452	-4.99315	5.94013e-07	5.41622e-05
AT4G01985	44.1124	3.80047	0.762221	4.98605	6.16263e-07	5.56893e-05
AT2G43200	294.046	-1.0803	0.217277	-4.97199	6.62698e-07	5.96192e-05
AT5G28770	252.803	-2.50522	0.504542	-4.96534	6.85824e-07	6.14268e-05
AT1G70560	207.769	-1.07979	0.217862	-4.95631	7.18448e-07	6.35058e-05
AT4G12690	111.29	-1.41688	0.285791	-4.95775	7.13157e-07	6.35058e-05
AT4G11460	16.0357	-5.96688	1.20512	-4.95127	7.37296e-07	6.43291e-05
AT5G15500	475.298	1.87716	0.379122	4.95134	7.37045e-07	6.43291e-05
AT5G24110	38.9632	-2.86522	0.578551	-4.9524	7.33029e-07	6.43291e-05
AT1G62480	1689.96	-1.80482	0.365797	-4.93394	8.05874e-07	6.91208e-05
AT1G02205	1761.43	2.40778	0.489277	4.9211	8.60594e-07	7.31938e-05
AT1G48100	316.571	1.49368	0.303795	4.91674	8.79992e-07	7.45306e-05
AT1G06830	61.5773	-2.4428	0.498681	-4.89852	9.65625e-07	8.07694e-05
AT2G28160	74.3614	1.74258	0.355936	4.89577	9.79204e-07	8.15681e-05
AT4G30460	187.834	1.65772	0.338685	4.89456	9.85257e-07	8.1736e-05
AT1G63710	110.146	1.49534	0.305899	4.88833	1.01696e-06	8.33416e-05
AT1G72430	494.136	-1.68261	0.344203	-4.88842	1.01646e-06	8.33416e-05
AT2G16990	341.796	1.42775	0.292461	4.88185	1.05095e-06	8.57794e-05
AT4G21380	819.687	1.39101	0.285134	4.87844	1.06928e-06	8.69253e-05
AT5G40800	133.05	2.38037	0.488746	4.87035	1.11399e-06	9.01972e-05
AT4G12390	292.939	-1.20183	0.247139	-4.86298	1.15633e-06	9.32524e-05
AT3G10940	1080.03	1.35734	0.279199	4.86154	1.16478e-06	9.35617e-05
AT3G62950	39.2498	-4.53754	0.937163	-4.84178	1.28678e-06	0.000101746
AT4G37800	2551.33	-1.46577	0.30358	-4.82827	1.37726e-06	0.000107302
AT1G02640	207.892	-1.74635	0.361784	-4.82705	1.38569e-06	0.000107468
AT5G18670	316.119	-1.48164	0.307041	-4.82554	1.39622e-06	0.000107872
AT5G56160	102.445	1.39319	0.288912	4.82221	1.41978e-06	0.000108861
AT3G16690	102.543	-1.34353	0.278749	-4.81984	1.43675e-06	0.000109746
AT5G48540	243.001	-1.73376	0.360754	-4.80592	1.54042e-06	0.000116986
AT1G70640	23.8786	3.1417	0.654367	4.80113	1.57771e-06	0.000118282
AT2G36270	39.1449	2.72891	0.568573	4.79958	1.59002e-06	0.000118765
AT2G37870	188.151	5.64837	1.17773	4.79597	1.61891e-06	0.000120478
AT5G43890	9.54935	-6.68706	1.3958	-4.79086	1.66068e-06	0.000123134
AT5G56780	110.609	-1.17592	0.24554	-4.78912	1.67517e-06	0.000123755
AT3G51660	421.891	1.09802	0.229317	4.78821	1.68279e-06	0.000123865
AT1G20030	237.608	1.57171	0.328556	4.78367	1.7212e-06	0.000125778
AT4G09020	3888.99	1.21226	0.253399	4.78398	1.71857e-06	0.000125778
AT1G07430	222.919	3.99584	0.835607	4.78196	1.73595e-06	0.0001264
AT4G37520	412.889	-1.14296	0.239084	-4.78057	1.74795e-06	0.000126817
AT2G40330	44.6859	-4.40859	0.923738	-4.77255	1.81906e-06	0.000130218
AT2G46250	369.817	-1.0059	0.210979	-4.76777	1.86277e-06	0.000132302
AT3G08770	884.687	1.38081	0.291258	4.74085	2.12823e-06	0.000149582
AT2G30930	800.702	-1.50025	0.316572	-4.73905	2.14723e-06	0.000150395
AT3G30775	488.959	-3.0953	0.653936	-4.73334	2.20854e-06	0.000153852
AT1G65486	136.622	-1.6199	0.343132	-4.72092	2.34781e-06	0.0001611
AT1G20450	4799.83	1.19537	0.253965	4.70683	2.51604e-06	0.000170702
AT2G31110	485.871	-1.18127	0.251118	-4.70404	2.55064e-06	0.0001721
AT1G19380	107.423	-1.91746	0.408078	-4.69877	2.61736e-06	0.000176016
AT1G52270	74.6227	-2.13554	0.4548	-4.69557	2.6587e-06	0.0001774
AT1G60190	161.5	2.99501	0.637816	4.69573	2.6566e-06	0.0001774
AT1G49560	244.777	1.04972	0.22367	4.69314	2.69037e-06	0.000178553
AT5G66400	586.849	1.7266	0.367984	4.69206	2.70464e-06	0.000178913
AT1G06090	22.4662	2.70881	0.577649	4.68937	2.74044e-06	0.000179521
AT1G65310	147.976	-2.70462	0.577358	-4.68449	2.80664e-06	0.000182772
AT5G52882	557.153	-2.05853	0.439507	-4.68372	2.81715e-06	0.000182772
AT3G22550	436.119	1.26307	0.270205	4.67449	2.94691e-06	0.000189972
AT1G45191	587.793	1.16717	0.249982	4.66903	3.02631e-06	0.000192637
AT5G43290	16.3663	-3.00967	0.644453	-4.67012	3.01027e-06	0.000192637
AT2G33380	1129.84	2.4697	0.529133	4.66745	3.04959e-06	0.00019351
AT2G29500	59.3705	1.78018	0.381519	4.66605	3.07047e-06	0.000193622
AT2G38995	290.068	1.29283	0.277205	4.66381	3.10406e-06	0.000195132
AT2G04170	254.516	1.1817	0.253569	4.66028	3.15776e-06	0.000197893
AT1G10970	1699.36	1.72202	0.371866	4.63075	3.64344e-06	0.000221473
AT4G15440	478.286	1.5158	0.327331	4.63079	3.64281e-06	0.000221473
AT1G78460	2358.74	-1.69326	0.366878	-4.61532	3.92482e-06	0.000237153
AT4G14090	555.072	4.18783	0.90844	4.60992	4.0283e-06	0.000242681
AT5G52300	49.1625	3.69843	0.803445	4.60321	4.16019e-06	0.000246952
AT3G18773	110.094	-1.4792	0.321458	-4.60153	4.19401e-06	0.000248232
AT5G20830	910.717	1.39804	0.303936	4.59978	4.22931e-06	0.000249591
AT2G19190	79.4195	-3.49324	0.760572	-4.59292	4.37091e-06	0.000256452
AT1G57590	508.766	1.71727	0.374087	4.59056	4.42066e-06	0.000257135
AT2G47670	39.9223	2.15677	0.469785	4.59097	4.41187e-06	0.000257135
AT4G06534	103.722	1.78452	0.388733	4.59061	4.41963e-06	0.000257135
AT2G36830	4555.18	-1.1447	0.249411	-4.5896	4.44105e-06	0.000257581
AT2G24720	7.25804	23.7661	5.18471	4.58388	4.56426e-06	0.000263971
AT3G28007	144.682	2.11764	0.463329	4.57047	4.86622e-06	0.000277262
AT4G04570	1366.42	-1.08258	0.236945	-4.56892	4.90255e-06	0.000277262
AT4G20000	15.4212	-7.4056	1.62083	-4.56902	4.90008e-06	0.000277262
AT1G30720	35.4594	-4.18532	0.918467	-4.55685	5.19266e-06	0.000290359
AT3G09330	15.3999	-2.65564	0.583134	-4.55409	5.26126e-06	0.000293384
AT1G65390	24.3801	-4.32745	0.951505	-4.548	5.41573e-06	0.000301168
AT4G30270	2486.45	-1.47004	0.323468	-4.54461	5.50366e-06	0.000303556
AT4G13330	48.8279	-1.58568	0.348977	-4.54379	5.5251e-06	0.00030391
AT5G03190	862.675	1.06001	0.233592	4.53786	5.68286e-06	0.000310061
AT5G67190	143.889	-1.15828	0.255223	-4.5383	5.67092e-06	0.000310061
AT2G37760	640.58	1.13324	0.249775	4.53706	5.70431e-06	0.000310394
AT1G69790	40.6544	2.20526	0.486676	4.53127	5.86308e-06	0.000317414
AT1G56600	2066.31	1.65914	0.366379	4.52849	5.94065e-06	0.000320669
AT1G18870	406.783	1.81371	0.401524	4.51707	6.27001e-06	0.000333994
AT1G26800	276.332	-1.67753	0.371966	-4.50991	6.48558e-06	0.000343668
AT3G27210	233.106	1.12781	0.250375	4.50447	6.65394e-06	0.000348935
AT5G59310	479.66	3.96235	0.879619	4.50462	6.64923e-06	0.000348935
AT3G26510	1019.03	-1.64991	0.366788	-4.49827	6.85072e-06	0.000358326
AT5G17760	145.795	1.25966	0.280274	4.49437	6.97759e-06	0.000362155
AT5G65280	127.472	1.45478	0.32413	4.48824	7.18126e-06	0.000371773
AT4G26270	459.303	1.13613	0.253985	4.47321	7.70541e-06	0.000393871
AT1G68570	1201.27	1.25563	0.280935	4.46948	7.84102e-06	0.000399793
AT1G04660	69.8163	-2.22515	0.498554	-4.4632	8.07454e-06	0.000409636
AT1G57990	641.202	-1.89538	0.424847	-4.46132	8.14575e-06	0.00041027
AT1G69610	235.847	1.14077	0.255737	4.46073	8.16811e-06	0.00041027
AT3G11020	35.8797	2.38633	0.534919	4.46111	8.15346e-06	0.00041027
AT1G03870	987.364	-2.53561	0.56915	-4.45509	8.38574e-06	0.000420159
AT1G11260	1476.85	-1.2864	0.289083	-4.44995	8.58918e-06	0.000428232
AT1G27020	752.683	-3.56511	0.801558	-4.44772	8.67858e-06	0.000431626
AT3G51450	451.975	1.55804	0.350595	4.44399	8.83077e-06	0.000435981
AT3G50760	309.067	1.35164	0.304427	4.43995	8.99803e-06	0.000443158
AT2G31730	125.361	-1.80761	0.407259	-4.43848	9.05977e-06	0.000445116
AT4G00200	80.2702	1.35389	0.305115	4.43731	9.10903e-06	0.000445375
AT1G01250	164.103	1.73896	0.392729	4.42788	9.51651e-06	0.000464176
AT5G47060	287.636	1.12063	0.253811	4.41522	1.00906e-05	0.000490995
AT2G43530	1546.49	1.28105	0.290531	4.40933	1.03693e-05	0.000502142
AT1G19570	10423.8	1.11147	0.252143	4.40809	1.04286e-05	0.000502608
AT1G30260	160.928	1.12188	0.25448	4.40853	1.04076e-05	0.000502608
AT5G46790	411.198	-1.06175	0.240947	-4.40658	1.05014e-05	0.000504916
AT2G36750	26.2303	3.36436	0.763866	4.40438	1.06086e-05	0.000508861
AT4G11290	248.861	-1.70226	0.386968	-4.39897	1.08766e-05	0.000519256
AT1G12880	180.594	1.21813	0.277657	4.38717	1.14833e-05	0.000545565
AT3G11580	82.8312	1.30332	0.297162	4.38588	1.15519e-05	0.000545565
AT3G18485	37.7351	1.77669	0.405149	4.38528	1.15836e-05	0.000545565
AT5G15190	56.7815	1.81152	0.412993	4.38633	1.15278e-05	0.000545565
AT5G54060	353.298	5.42078	1.23645	4.38416	1.16435e-05	0.000545575
AT4G15990	17.7349	-3.24631	0.742313	-4.37324	1.22417e-05	0.000567038
AT3G50140	30.5857	-3.11261	0.712228	-4.37025	1.24107e-05	0.000573555
AT2G45180	15223.9	-1.85013	0.423482	-4.36885	1.24905e-05	0.000575927
AT1G18265	58.1684	1.5644	0.358962	4.35811	1.31188e-05	0.000600792
AT1G12940	42.1324	-3.61424	0.82944	-4.35745	1.31587e-05	0.000601261
AT4G27300	2387.19	-1.35032	0.310081	-4.35473	1.33228e-05	0.000607388
AT5G06760	19.8637	3.77743	0.868337	4.35019	1.36019e-05	0.000615952
AT1G78070	2513.35	1.2473	0.287935	4.33189	1.47838e-05	0.000660412
AT4G21120	34.5632	-2.96636	0.684841	-4.33146	1.48121e-05	0.000660412
AT5G16570	216.898	-2.2415	0.517595	-4.33061	1.48694e-05	0.000661507
AT1G23480	509.761	-1.28096	0.296192	-4.32475	1.52704e-05	0.000676375
AT4G18970	1429.97	-1.06038	0.24535	-4.32188	1.54702e-05	0.000682701
AT2G28630	353.885	-1.85388	0.429593	-4.31543	1.59291e-05	0.000696406
AT2G45400	180.444	-1.22042	0.282844	-4.31482	1.59734e-05	0.000696839
AT5G13170	23.2867	4.62946	1.07509	4.30611	1.66152e-05	0.000720182
AT3G09780	42.0436	-2.31764	0.539557	-4.29544	1.74345e-05	0.000750869
AT1G46554	182.857	1.22883	0.286364	4.29115	1.77753e-05	0.000763923
AT4G19820	38.4202	-1.53493	0.358265	-4.28433	1.83292e-05	0.000784398
AT5G67140	293.817	1.01623	0.237271	4.28299	1.844e-05	0.000787475
AT5G52320	1159.72	1.06163	0.248301	4.27557	1.90647e-05	0.000810731
AT1G16445	44.3748	-1.89026	0.442278	-4.27391	1.92077e-05	0.000813394
AT3G16240	6116.37	-1.92068	0.449944	-4.2687	1.96612e-05	0.000827209
AT4G12730	2583.14	-1.22499	0.287071	-4.26722	1.97928e-05	0.000829493
AT3G06500	1241.57	1.16282	0.27268	4.26441	2.00435e-05	0.000834238
AT5G24770	4082.57	4.10964	0.963576	4.26499	1.99914e-05	0.000834238
AT5G56100	102.262	-1.54751	0.362917	-4.2641	2.00708e-05	0.000834238
AT5G07990	181.612	1.75503	0.412246	4.25723	2.06976e-05	0.000855021
AT5G49360	1001.59	-3.02672	0.712367	-4.24882	2.14903e-05	0.000884158
AT1G48930	3.46543	22.0027	5.18479	4.24371	2.19853e-05	0.00089723
AT5G49525	82.0293	1.3563	0.319922	4.23948	2.24035e-05	0.000912457
AT4G37180	529.883	1.07499	0.253777	4.23598	2.27559e-05	0.000923095
AT5G25280	2386.84	-1.14291	0.269973	-4.23343	2.30154e-05	0.000929897
AT1G13920	206.407	1.09366	0.258473	4.23124	2.32403e-05	0.000935249
AT3G50280	43.805	2.57544	0.60925	4.22723	2.36586e-05	0.000946438
AT2G39800	12652.5	2.62816	0.621888	4.22609	2.37786e-05	0.000947495
AT3G18217	88.4156	-1.01675	0.240577	-4.22631	2.37559e-05	0.000947495
AT2G27402	431.13	-1.62507	0.385108	-4.21979	2.44535e-05	0.00096841
AT5G52810	317.832	1.05191	0.249303	4.2194	2.44949e-05	0.00096841
AT5G10410	117.654	1.60106	0.379965	4.2137	2.51226e-05	0.000987439
AT3G15450	1039.11	-2.86567	0.680205	-4.21295	2.5206e-05	0.000988797
AT4G37730	23.813	2.45413	0.582855	4.21053	2.54771e-05	0.000997501
AT2G39200	50.2607	-2.43577	0.579066	-4.20638	2.59499e-05	0.00101015
AT5G08350	66.5191	-1.98614	0.473305	-4.19632	2.71281e-05	0.00104795
AT2G02930	30.5713	-2.53027	0.603893	-4.18992	2.79048e-05	0.00107182
AT4G23990	546.492	1.70929	0.407937	4.19007	2.78864e-05	0.00107182
AT1G29660	5519.65	-1.14842	0.274169	-4.18874	2.80509e-05	0.00107539
AT2G30010	1013.58	-1.3758	0.328795	-4.18438	2.85944e-05	0.00109209
AT4G25480	261.392	3.71546	0.888767	4.18046	2.90918e-05	0.00110691
AT1G02650	12.0679	-3.67389	0.881316	-4.16864	3.06426e-05	0.00115506
AT5G03350	2632.05	2.43095	0.584419	4.15959	3.18813e-05	0.00119507
AT1G78750	12.8596	-3.28831	0.791417	-4.15496	3.25344e-05	0.00121506
AT3G55940	128.541	1.28002	0.308287	4.15203	3.29539e-05	0.00122171
AT3G26520	14693.9	-1.00422	0.242265	-4.14515	3.39596e-05	0.00124984
AT3G63160	5456.39	1.05887	0.255948	4.13705	3.518e-05	0.00129006
AT3G45140	40778.4	2.44984	0.592666	4.1336	3.57131e-05	0.00130488
AT1G65900	311.465	1.15828	0.280458	4.12996	3.62832e-05	0.00131857
AT1G54570	298.468	1.10489	0.267617	4.12864	3.64923e-05	0.00132157
AT3G13130	8.28156	5.62975	1.36373	4.1282	3.65615e-05	0.00132157
AT5G44020	3346.67	-2.19295	0.531199	-4.12831	3.65436e-05	0.00132157
AT1G19960	2681.91	1.97892	0.479482	4.1272	3.67202e-05	0.00132494
AT3G59140	1303.27	1.03894	0.252284	4.11814	3.81938e-05	0.00136835
AT5G19120	476.386	-2.37748	0.577516	-4.11674	3.84276e-05	0.00137429
AT3G16530	3265.13	-3.05626	0.742608	-4.11558	3.86215e-05	0.00137879
AT1G33790	58.8013	-1.70227	0.414192	-4.10987	3.95889e-05	0.00140836
AT1G52040	4862.22	2.68431	0.653389	4.10829	3.98606e-05	0.00141554
AT5G62360	125.552	-2.14369	0.521919	-4.10731	4.00293e-05	0.00141849
AT5G03210	96.4715	3.04139	0.741323	4.10265	4.08444e-05	0.00144037
AT1G10560	48.3235	1.41617	0.345405	4.10002	4.13111e-05	0.00145177
AT2G42900	64.9432	-1.51177	0.369051	-4.09637	4.19687e-05	0.00146471
AT3G50560	74.7607	-3.07762	0.752589	-4.08938	4.32537e-05	0.00150017
AT1G34580	130.553	1.65144	0.40434	4.08428	4.42141e-05	0.00152179
AT1G22400	133.116	-1.65898	0.406799	-4.07813	4.53989e-05	0.00155231
AT1G11545	525.033	-1.26418	0.310255	-4.07466	4.60824e-05	0.00157302
AT1G21400	1384.18	1.07699	0.264683	4.06898	4.72194e-05	0.00160372
AT1G78440	23.1939	3.60492	0.886714	4.06548	4.79331e-05	0.00162251
AT1G78370	11354.3	1.35358	0.333298	4.06116	4.88295e-05	0.0016446
AT1G21440	1983.05	1.04786	0.258162	4.05894	4.92967e-05	0.00165282
AT4G25850	13.5111	3.03773	0.748424	4.05883	4.93185e-05	0.00165282
AT1G66940	1043.36	-1.02005	0.251657	-4.05334	5.04906e-05	0.00168652
AT1G51850	34.8238	-3.42216	0.844381	-4.05287	5.05935e-05	0.00168717
AT2G39030	197.915	3.6082	0.890732	4.05082	5.10376e-05	0.00169839
AT4G25000	20.6053	2.10549	0.519803	4.05055	5.10977e-05	0.00169839
AT1G04570	117.302	2.22686	0.550147	4.04776	5.171e-05	0.00171312
AT3G55110	274.777	1.02228	0.253203	4.03738	5.40509e-05	0.00177613
AT4G37400	112.182	1.14836	0.284785	4.03239	5.52116e-05	0.00180257
AT5G19470	1677.61	3.48985	0.866131	4.02924	5.59569e-05	0.00182103
AT2G05540	153.531	-2.45454	0.612057	-4.01032	6.06373e-05	0.00195138
AT1G65484	12.9716	-3.20357	0.798932	-4.00981	6.07668e-05	0.00195245
AT3G02140	27.0494	-2.57585	0.642839	-4.00699	6.14986e-05	0.00197283
AT1G52400	22248.4	2.52901	0.632031	4.0014	6.2969e-05	0.00200412
AT1G80110	203.79	1.19221	0.298524	3.99367	6.50574e-05	0.00206409
AT4G04840	500.831	-1.66739	0.417635	-3.99245	6.53954e-05	0.00207157
AT5G60900	568.667	1.51691	0.380068	3.99114	6.57554e-05	0.00207648
AT2G39710	448.369	1.15458	0.289401	3.98955	6.61979e-05	0.00208719
AT1G55760	312.274	1.12641	0.282841	3.98248	6.81997e-05	0.00214363
AT1G75250	28.6955	-3.07667	0.773508	-3.97756	6.96266e-05	0.00217833
AT5G57560	261.377	-2.042	0.5161	-3.95661	7.60208e-05	0.00236014
AT3G53980	437.817	2.49204	0.630596	3.95189	7.75373e-05	0.00239986
AT5G23350	27.9339	-2.17148	0.549871	-3.94907	7.84569e-05	0.00241724
AT1G75580	52.8892	1.43649	0.36417	3.94455	7.99503e-05	0.00245577
AT1G44800	408.555	-1.13637	0.288254	-3.94225	8.07203e-05	0.00247192
AT2G23290	165.323	-1.52387	0.387036	-3.93728	8.24091e-05	0.00251983
AT2G42870	91.975	-1.94738	0.495351	-3.93131	8.44827e-05	0.00257545
AT3G26200	452.627	-3.28869	0.837288	-3.92778	8.57322e-05	0.00260569
AT5G24570	181.956	-1.12919	0.287708	-3.92476	8.68152e-05	0.00262678
AT4G14130	51.3204	-2.43199	0.620236	-3.92107	8.81568e-05	0.00265546
AT1G51380	31.1057	-2.2745	0.582713	-3.90329	9.48937e-05	0.00284403
AT2G19910	40.4027	-1.91207	0.490409	-3.89893	9.66175e-05	0.00288031
AT2G23010	243.947	1.85116	0.47579	3.89071	9.99495e-05	0.00296654
AT4G06536	50.0354	1.48449	0.382223	3.88382	0.000102826	0.00302091
AT2G23000	587.453	1.18386	0.305023	3.88122	0.000103933	0.0030446
AT3G60420	247.416	1.00578	0.259382	3.87758	0.000105501	0.00308605
AT1G75750	873.478	-2.6744	0.690593	-3.87262	0.000107674	0.00314053
AT3G13790	173.964	-1.73471	0.448255	-3.86991	0.000108876	0.00316647
AT1G73210	90.18	1.05275	0.272175	3.86791	0.000109773	0.00318099
AT4G36570	165.301	-2.43548	0.629691	-3.86774	0.000109846	0.00318099
AT3G01990	68.2258	-1.77023	0.460056	-3.84785	0.000119157	0.00337812
AT5G61440	69.2776	-2.10848	0.548714	-3.84258	0.000121747	0.00344267
AT3G02020	4733.17	1.07462	0.280541	3.83053	0.000127869	0.0035949
AT1G14250	1185.14	3.42059	0.893633	3.82773	0.00012933	0.00362089
AT3G62610	16.4445	2.6415	0.690616	3.82485	0.000130854	0.00365345
AT4G06746	65.1785	-2.62084	0.686167	-3.81953	0.000133705	0.00371767
AT2G28500	49.4823	1.79959	0.47137	3.81778	0.000134655	0.00373382
AT1G12570	246.8	1.40467	0.368436	3.81251	0.000137563	0.00379883
AT1G79520	534.011	1.00975	0.26493	3.8114	0.000138183	0.00381076
AT5G44380	79.7997	-2.05291	0.538747	-3.81053	0.000138672	0.00381903
AT5G38970	60.6077	-1.45785	0.382839	-3.80799	0.000140101	0.00385316
AT3G42800	52.1756	-1.93149	0.507274	-3.80759	0.000140327	0.00385412
AT1G02390	114.072	1.15025	0.302502	3.80246	0.000143266	0.00392422
AT1G63720	78.5609	1.27494	0.335291	3.80249	0.000143252	0.00392422
AT1G07050	14.6435	2.86973	0.755538	3.79826	0.000145718	0.00397524
AT2G45600	344.819	1.13792	0.299952	3.79366	0.000148443	0.00403868
AT1G20490	164.054	1.09826	0.289972	3.78748	0.000152184	0.00412935
AT1G58370	131.576	-1.07073	0.282956	-3.7841	0.000154266	0.00416908
AT1G22330	324.088	-1.20696	0.319071	-3.78272	0.000155125	0.00418114
AT2G01850	1521.78	-1.16974	0.309818	-3.77559	0.000159632	0.0042768
AT3G52480	70.7188	-1.68149	0.445705	-3.77266	0.000161515	0.00430749
AT2G41150	52.5165	-1.45497	0.386188	-3.76753	0.000164872	0.00439125
AT5G11460	155.344	1.01974	0.270695	3.76712	0.000165144	0.0043927
AT2G30600	1260.85	-1.80296	0.479924	-3.75676	0.000172129	0.00455454
AT1G70985	85.2575	-1.13562	0.302509	-3.75399	0.000174043	0.00459319
AT2G29950	39.5394	1.45361	0.388194	3.74454	0.000180723	0.00473859
AT1G78530	58.1254	-1.32781	0.355175	-3.73848	0.000185139	0.00482935
AT3G05320	61.1938	-1.57427	0.422358	-3.72732	0.000193524	0.00500296
AT5G57810	19.2952	2.51474	0.677662	3.71091	0.000206516	0.00527816
AT5G17450	174.433	1.16513	0.314451	3.70526	0.000211171	0.00535655
AT3G28840	67.0417	1.34075	0.362211	3.70156	0.000214275	0.00541492
AT1G24530	129.206	-1.49767	0.405347	-3.69478	0.000220081	0.005534
AT4G27450	284.362	-3.3005	0.894031	-3.69171	0.000222751	0.0055942
AT2G38620	50.8046	1.20306	0.327178	3.67709	0.00023591	0.00584491
AT1G05810	166.083	-1.1886	0.323307	-3.67639	0.000236558	0.0058538
AT1G45145	364.682	1.21373	0.330226	3.67546	0.000237425	0.00586809
AT2G35070	139.446	2.04654	0.557202	3.67289	0.00023982	0.00591284
AT4G21440	23.8335	1.81095	0.494002	3.66587	0.0002465	0.00606276
AT1G15310	115.388	1.4232	0.388609	3.6623	0.000249959	0.00611862
AT5G01550	9.21655	-5.06634	1.38332	-3.66246	0.000249806	0.00611862
AT5G52250	42.893	-1.80316	0.492425	-3.6618	0.000250445	0.00612259
AT5G24470	217.352	1.69379	0.462897	3.6591	0.000253101	0.00617261
AT2G43590	935.446	-1.27244	0.34787	-3.65779	0.000254397	0.00618931
AT1G58190	19.6747	-2.85236	0.780009	-3.65683	0.000255357	0.0062052
AT1G23760	4.6004	-5.49122	1.50269	-3.65426	0.000257929	0.00623776
AT5G24780	294.259	3.78479	1.03665	3.651	0.000261222	0.00630986
AT5G35525	8.51647	-4.71776	1.29404	-3.64575	0.000266612	0.00639427
AT4G04745	20.5391	-2.80418	0.769461	-3.64435	0.000268071	0.00642166
AT1G19510	26.2038	-2.05951	0.565877	-3.63951	0.000273155	0.00652799
AT1G75090	42.6647	1.32738	0.365069	3.63598	0.00027693	0.0065858
AT5G61590	1671.95	-1.3372	0.368008	-3.63362	0.000279469	0.00661703
AT3G15356	1660.72	-2.34285	0.645192	-3.63124	0.000282062	0.00666219
AT2G39050	543.898	1.13838	0.31372	3.62865	0.000284902	0.0067136
AT1G04360	25.8768	-2.09229	0.576803	-3.62739	0.000286301	0.00671531
AT1G76690	396.73	1.29655	0.35739	3.62784	0.000285808	0.00671531
AT3G27870	556.195	1.0383	0.286194	3.62798	0.000285646	0.00671531
AT5G16980	108.555	1.4398	0.397708	3.62024	0.00029433	0.00688767
AT2G43100	1728.21	1.10989	0.306857	3.61696	0.000298082	0.00695938
AT1G64660	782.386	1.37519	0.380372	3.61539	0.000299896	0.00699365
AT4G21910	2833.36	1.04391	0.28886	3.61389	0.000301635	0.00701805
AT3G06160	30.593	1.58903	0.440432	3.60788	0.000308707	0.00712822
AT5G03120	498.403	-1.51629	0.421399	-3.59823	0.000320386	0.00734036
AT3G47750	109.399	-1.01426	0.282303	-3.5928	0.000327148	0.00746577
AT3G25795	5.55974	6.18655	1.72478	3.58686	0.000334683	0.00760181
AT5G59080	375.62	-1.2539	0.349673	-3.58591	0.000335905	0.0076141
AT1G23020	1693.55	-1.28538	0.358604	-3.58441	0.000337841	0.00764941
AT4G37140	12.8935	3.76718	1.0517	3.58199	0.000340985	0.00769478
AT5G62865	72.1355	-1.0999	0.3072	-3.58041	0.00034306	0.00772439
AT1G51820	13.1521	-3.51034	0.983002	-3.57104	0.000355569	0.00796176
AT3G52360	183.122	-1.07629	0.301381	-3.5712	0.000355354	0.00796176
AT1G69520	68.2371	-1.33251	0.373556	-3.5671	0.000360954	0.0080645
AT1G72140	68.1811	-1.2829	0.3601	-3.56261	0.000367181	0.00814172
AT1G52410	4064.97	1.64697	0.463414	3.55399	0.000379436	0.00834123
AT5G54720	102.626	-1.19568	0.336875	-3.54931	0.000386236	0.00843487
AT1G35350	558.522	-1.04003	0.294086	-3.53649	0.000405489	0.00879153
AT2G23690	54.0757	-1.34669	0.380991	-3.53469	0.000408249	0.00882881
AT1G01340	99.1251	-1.45773	0.412848	-3.5309	0.00041415	0.00892504
AT1G11210	443.788	2.21648	0.627775	3.5307	0.000414462	0.00892504
AT5G04310	36.9729	-1.32075	0.374134	-3.53015	0.000415331	0.00893425
AT1G56650	551.785	2.30091	0.652194	3.52796	0.000418776	0.00899879
AT5G15350	778.214	-1.14112	0.324115	-3.52072	0.000430383	0.0092091
AT5G25460	4021.42	-1.01089	0.287591	-3.51503	0.000439698	0.00938856
AT1G22890	292.149	-2.34362	0.667644	-3.51029	0.000447619	0.00950756
AT1G08440	3.89673	5.71473	1.63074	3.50438	0.000457666	0.00965068
AT2G04795	56.9641	-1.10081	0.31457	-3.49942	0.000466276	0.00979083
AT1G70270	10.405	-3.54066	1.01255	-3.49676	0.000470937	0.00987845
AT2G43620	218.12	-3.0088	0.860711	-3.49571	0.000472796	0.0098867
AT5G03720	14.4213	-2.3151	0.662637	-3.49377	0.000476257	0.00992831
AT4G13800	163.346	1.50483	0.431234	3.48959	0.000483765	0.0100538
AT4G04955	707.844	-1.1874	0.340298	-3.4893	0.000484283	0.0100542
AT2G42530	3044.44	1.6712	0.479071	3.48841	0.000485906	0.0100775
AT4G01750	129.204	-1.50288	0.431066	-3.48642	0.000489535	0.0101321
AT1G68740	293.19	-1.00103	0.287207	-3.48541	0.000491389	0.0101497
AT3G54830	273.356	-1.47557	0.4237	-3.48257	0.000496618	0.0102264
AT2G23910	9.23007	4.89326	1.40585	3.48063	0.000500236	0.01028
AT4G37450	723.343	-1.02723	0.297717	-3.45037	0.00055982	0.0113093
AT5G05860	115.134	-1.08623	0.31485	-3.44998	0.000560638	0.0113145
AT3G23870	64.6301	1.38849	0.402925	3.44603	0.000568881	0.0114352
AT1G33770	63.1955	-1.69001	0.490607	-3.44474	0.000571604	0.0114672
AT3G09910	77.9118	1.38244	0.40215	3.43763	0.000586834	0.0117147
AT4G08950	350.719	-1.186	0.345283	-3.43487	0.000592834	0.0118112
AT1G13609	1649.95	5.4325	1.58242	3.43303	0.000596875	0.0118567
AT5G15330	126.558	-1.03872	0.302713	-3.43136	0.000600556	0.0119181
AT2G46270	240.238	1.30817	0.381586	3.42825	0.00060749	0.0120321
AT1G30190	33.1191	2.34436	0.684137	3.42674	0.00061088	0.0120874
AT1G73830	187.957	-1.45615	0.425009	-3.42617	0.000612154	0.0121008
AT5G02550	81.4323	1.46794	0.42868	3.42432	0.000616331	0.0121596
AT1G01180	247.751	-1.0353	0.302497	-3.4225	0.000620483	0.0121942
AT1G66230	76.2103	-1.8178	0.531174	-3.42223	0.000621097	0.0121942
AT3G15770	179.875	-1.3229	0.386843	-3.41974	0.00062682	0.0122947
AT2G37260	106.266	1.24579	0.364408	3.41867	0.000629291	0.0123193
AT3G45970	96.8853	-2.59949	0.763029	-3.40681	0.000657275	0.0127929
AT4G39795	73.5821	1.31457	0.386058	3.40511	0.000661381	0.0128481
AT5G05270	500.441	1.4062	0.414238	3.39467	0.000687102	0.0132402
AT1G52000	5320.39	1.81777	0.536161	3.39035	0.000698042	0.0133931
AT1G11340	88.217	-1.11948	0.330596	-3.38624	0.000708586	0.0135441
AT2G41990	49.7192	-2.46052	0.726795	-3.38544	0.000710652	0.0135708
AT2G45570	11.1626	3.27011	0.966204	3.38449	0.000713106	0.0136048
AT1G22530	1253.14	-2.23071	0.659833	-3.38071	0.000722979	0.0137414
AT4G34770	54.4734	-1.82657	0.540499	-3.37942	0.000726393	0.0137685
AT2G43140	11.5598	-3.78882	1.12128	-3.37902	0.000727453	0.0137747
AT3G03170	27.0911	1.67735	0.496523	3.3782	0.000729627	0.0138029
AT1G30250	19.5908	3.14427	0.93147	3.3756	0.00073656	0.0139081
AT3G09260	4418.4	-1.13409	0.336065	-3.37463	0.000739161	0.0139442
AT2G41380	96.6219	1.53798	0.455895	3.37353	0.000742103	0.0139841
AT3G62780	33.5413	1.84548	0.547081	3.37333	0.00074266	0.0139841
AT3G57640	64.2685	1.10602	0.328105	3.37094	0.000749112	0.0140663
AT4G03460	8.54231	-4.42982	1.31488	-3.36899	0.000754433	0.01414
AT1G16410	8042.67	1.03692	0.307883	3.36789	0.000757463	0.0141677
AT2G27660	28.7554	-1.89865	0.564002	-3.36639	0.000761591	0.0142002
AT4G38400	153.207	-1.21358	0.360542	-3.36598	0.000762711	0.0142002
AT5G61820	2574.17	1.03917	0.308746	3.36579	0.000763255	0.0142002
AT4G17860	11.1061	-3.7128	1.1046	-3.36121	0.00077602	0.0144112
AT1G14520	491.588	1.1064	0.330432	3.34833	0.000812997	0.014947
AT5G52310	9041.65	2.42173	0.723853	3.3456	0.000821042	0.0150403
AT1G62910	37.8567	-1.08594	0.324697	-3.34448	0.000824361	0.0150738
AT3G02990	52.1475	1.18208	0.353428	3.34462	0.000823966	0.0150738
AT3G14440	190.134	1.11508	0.333451	3.34406	0.000825633	0.0150835
AT5G48430	23.9126	-3.90772	1.17053	-3.33843	0.000842525	0.0153643
AT3G04420	20.2691	-1.98966	0.59664	-3.33478	0.000853681	0.0155119
AT1G47400	289.933	4.32183	1.29787	3.32994	0.000868637	0.0157553
AT2G42540	10964.3	2.44645	0.735001	3.3285	0.000873142	0.0158087
AT3G16150	41.4645	-1.84978	0.555835	-3.32794	0.000874914	0.0158125
AT3G23120	256.25	2.18388	0.656795	3.32505	0.000884014	0.0159201
AT3G58850	92.1869	-1.29606	0.390932	-3.3153	0.000915444	0.0164131
AT1G21250	4372.31	1.09087	0.329223	3.31345	0.000921522	0.0164492
AT1G51090	410.092	2.43971	0.7367	3.31167	0.000927409	0.0165252
AT2G21220	20.5652	-1.91244	0.577972	-3.30889	0.000936677	0.0166757
AT4G32460	424.7	-1.07447	0.324903	-3.30704	0.000942868	0.0167417
AT5G19875	111.911	1.19639	0.36182	3.30658	0.000944423	0.0167546
AT2G13680	8.84228	3.05726	0.925508	3.30333	0.000955422	0.0169201
AT1G02940	21.1431	2.92223	0.885229	3.30111	0.000963047	0.0170105
AT4G37690	30.2693	1.35797	0.411903	3.29682	0.000977856	0.0172269
AT1G67970	164.813	1.01499	0.307972	3.29574	0.000981635	0.0172535
AT3G26500	61.742	-2.48142	0.752936	-3.29566	0.000981922	0.0172535
AT1G17060	57.761	-1.02669	0.31167	-3.29417	0.000987136	0.0173015
AT5G37300	74.8994	1.50869	0.458725	3.28887	0.00100589	0.0175376
AT5G06630	3.13054	-17.1143	5.20632	-3.28721	0.00101185	0.0176113
AT1G51800	163.997	-2.688	0.817845	-3.28669	0.00101372	0.0176286
AT1G62710	577.702	1.36007	0.415203	3.27569	0.00105405	0.0181903
AT4G33020	127.913	2.72513	0.83191	3.27575	0.00105382	0.0181903
AT4G24150	6.80075	-4.30835	1.3174	-3.27036	0.00107412	0.0184418
AT5G15970	8272.46	1.67623	0.512529	3.2705	0.00107356	0.0184418
AT2G40750	609.539	1.81398	0.554774	3.26977	0.00107637	0.0184439
AT1G68840	1912.9	-1.55633	0.476173	-3.26842	0.00108152	0.0184899
AT4G21850	57.5057	-1.87443	0.575382	-3.2577	0.00112318	0.0190573
AT1G73325	26.6139	4.48835	1.37833	3.25637	0.00112846	0.0191222
AT1G61795	134.843	-1.05145	0.322987	-3.25539	0.00113236	0.0191649
AT4G13195	134.196	1.09481	0.336777	3.25083	0.00115067	0.0194423
AT2G36050	158.058	-1.20499	0.370863	-3.24916	0.00115747	0.0195247
AT2G45170	460.791	-1.29209	0.397983	-3.24659	0.00116796	0.0196524
AT1G03940	256.304	1.76182	0.542872	3.24537	0.001173	0.0197044
AT2G25810	18.2141	1.84682	0.569655	3.242	0.00118693	0.0198234
AT1G61930	34.6888	1.88825	0.582675	3.24067	0.00119251	0.0198837
AT4G23450	39.7694	1.26133	0.389526	3.23812	0.00120321	0.0200016
AT1G10682	198.519	-1.27754	0.395098	-3.23347	0.00122296	0.020216
AT3G13750	3285.5	-1.65171	0.510834	-3.23336	0.00122343	0.020216
AT4G10950	3.6605	5.26905	1.6315	3.22958	0.00123971	0.020444
AT1G05260	74.2397	1.42444	0.441359	3.22739	0.00124923	0.0205251
AT1G36940	77.6772	-1.25958	0.390564	-3.22504	0.00125956	0.0206445
AT5G05790	93.4033	-1.00714	0.312343	-3.22447	0.00126204	0.0206629
AT3G21460	15.5739	-3.8846	1.20936	-3.21212	0.00131761	0.0214224
AT5G21940	593.782	-1.85618	0.577941	-3.21171	0.0013195	0.0214224
AT2G43520	49.347	-1.7944	0.560973	-3.19872	0.00138037	0.0221758
AT1G16705	29.2983	1.29201	0.404065	3.19753	0.0013861	0.0222149
AT5G39240	6.10455	3.92163	1.22642	3.19763	0.0013856	0.0222149
AT1G63440	82.6742	1.2473	0.3911	3.18922	0.00142657	0.0227196
AT1G17170	145.993	1.84783	0.579853	3.18672	0.00143898	0.022819
AT2G25470	13.9561	-2.93471	0.9209	-3.18678	0.00143864	0.022819
AT5G45830	59.5988	-1.35397	0.424857	-3.18689	0.00143812	0.022819
AT2G35910	26.5738	-1.32994	0.418316	-3.17926	0.00147652	0.0232951
AT5G25020	6.24229	2.74315	0.863527	3.17668	0.00148972	0.0234123
AT2G36255	3.96232	16.5888	5.22653	3.17396	0.00150373	0.0235411
AT5G04190	81.7735	-2.16685	0.683881	-3.16846	0.00153251	0.0238807
AT4G33905	12.6154	2.49212	0.788557	3.16035	0.0015758	0.0243512
AT4G34790	45.2067	-1.75515	0.55537	-3.16032	0.00157594	0.0243512
AT3G19230	58.0484	1.12097	0.354756	3.15984	0.00157858	0.0243602
AT3G50800	25.3979	-1.71343	0.542375	-3.15912	0.00158246	0.0243822
AT3G19680	967.921	-1.08576	0.343778	-3.15832	0.00158679	0.0243886
AT5G37940	13.2168	-2.77229	0.879059	-3.1537	0.00161213	0.024703
AT3G50480	1113.16	-1.5345	0.486969	-3.15113	0.0016264	0.0248323
AT5G63350	15.2647	3.10645	0.985839	3.15108	0.0016267	0.0248323
ATCG00090	21.3701	-1.44549	0.460372	-3.13983	0.00169045	0.0256123
AT1G80440	1520.52	-1.85376	0.590512	-3.13923	0.00169391	0.0256264
AT5G40790	17.1542	3.69147	1.17628	3.13827	0.00169948	0.0256723
AT5G19230	98.4799	-1.5612	0.499026	-3.1285	0.00175699	0.0263836
AT5G44130	880.856	-1.22725	0.392358	-3.12788	0.00176072	0.0264162
AT1G23010	50.2563	1.36365	0.43656	3.12363	0.00178633	0.0267646
AT2G26150	60.5246	-2.36827	0.758518	-3.12224	0.00179483	0.026872
AT4G15210	186.976	1.84705	0.591689	3.12165	0.00179838	0.0269053
AT3G12145	260.621	1.02615	0.329426	3.11497	0.00183963	0.0274211
AT1G53100	61.7363	2.08676	0.670523	3.11214	0.00185738	0.0276246
AT1G20160	430.237	1.03606	0.333196	3.10945	0.00187433	0.027795
AT5G52640	298.106	-1.22771	0.394827	-3.10948	0.00187414	0.027795
AT5G46730	103.747	1.1409	0.367407	3.10528	0.00190098	0.0279733
AT1G76090	460.238	-1.09584	0.353135	-3.10318	0.00191454	0.0281439
AT1G12672	8.90557	4.21666	1.35941	3.10182	0.00192333	0.0281759
AT2G16380	380.269	-1.20257	0.387696	-3.10184	0.00192321	0.0281759
AT4G04695	152.671	1.05686	0.340753	3.10155	0.00192507	0.0281759
AT1G73010	70.0737	1.7825	0.576368	3.09265	0.00198378	0.0288475
AT4G14380	21.6213	-1.42451	0.461477	-3.08686	0.00202285	0.0292685
AT5G50360	3.81969	5.44507	1.76428	3.08629	0.0020267	0.0292822
AT3G54390	169.001	1.00087	0.324331	3.08596	0.00202898	0.0292943
AT5G67411	8.35181	-3.601	1.16814	-3.08268	0.00205143	0.0295133
AT4G23280	17.7139	-3.3192	1.07896	-3.07629	0.00209595	0.029962
AT2G37950	66.1896	-1.90771	0.620187	-3.07603	0.00209778	0.0299671
AT1G12080	280.136	-1.27728	0.417281	-3.06096	0.00220628	0.0308844
AT4G32480	176.561	-1.32439	0.433503	-3.05509	0.00224991	0.0313223
AT1G10550	15.7904	-2.62086	0.858038	-3.05448	0.00225451	0.0313649
AT3G48360	14.6711	-2.84802	0.933279	-3.05162	0.00227607	0.031643
AT3G58120	802.614	-1.18487	0.388738	-3.04799	0.00230378	0.0319186
AT5G67090	25.4317	1.48239	0.486444	3.04739	0.00230834	0.03196
AT3G25190	29.0414	-2.91427	0.959075	-3.03863	0.00237657	0.0327032
AT4G28290	59.1592	-1.17131	0.386175	-3.0331	0.00242056	0.0332183
AT5G13930	2739.73	2.25097	0.74237	3.03214	0.00242824	0.0332781
AT4G16740	8.8752	5.13541	1.69512	3.02953	0.00244931	0.0334992
AT4G25490	24.656	2.17105	0.717742	3.02483	0.00248772	0.0337283
AT5G64410	369.703	-1.40354	0.464117	-3.02412	0.00249361	0.033763
AT4G32950	23.7838	-1.96343	0.649516	-3.02292	0.00250352	0.0338518
AT4G23210	30.6045	-1.8007	0.59624	-3.02008	0.00252704	0.0340335
AT3G25770	4518.05	1.39327	0.461493	3.01905	0.00253568	0.0341272
AT5G22920	438.005	-1.75393	0.581163	-3.01798	0.0025447	0.034203
AT3G12580	1012.91	-1.68272	0.558005	-3.0156	0.00256473	0.0343355
AT5G23010	8681.57	1.02765	0.340914	3.01441	0.00257483	0.0344205
AT5G49320	13.8009	-1.97129	0.654873	-3.01019	0.00261085	0.0347919
AT1G76250	13.4843	-2.13949	0.713248	-2.99964	0.002703	0.035598
AT1G02920	1840.55	-1.90069	0.633995	-2.99796	0.00271789	0.0357077
AT4G25433	6.88636	4.2697	1.42796	2.99006	0.0027892	0.0363783
AT1G15670	185.63	-1.55664	0.521094	-2.98725	0.00281501	0.0366676
AT1G27940	82.0948	1.25797	0.421272	2.98612	0.00282546	0.0367328
AT4G17280	27.4033	1.44868	0.485657	2.98292	0.00285512	0.0369477
AT4G37530	145.102	-1.02243	0.342778	-2.98276	0.00285659	0.0369477
AT3G02480	22.7258	2.87995	0.967664	2.97619	0.00291852	0.0376045
AT4G00970	309.492	-1.2743	0.428839	-2.9715	0.00296349	0.0380146
AT2G36690	29.6236	-2.77273	0.933308	-2.97087	0.00296962	0.038069
AT1G80180	864.64	-1.04725	0.352577	-2.97029	0.00297522	0.0380926
AT5G23940	1051.43	1.11816	0.376979	2.96611	0.00301597	0.0384441
AT3G62860	125.375	-1.11843	0.377351	-2.96389	0.00303779	0.0386492
AT3G55150	5.5714	-5.32987	1.79903	-2.96264	0.00305013	0.0387608
AT3G25760	1750.11	1.11253	0.375596	2.96204	0.00305608	0.0388087
AT1G57750	36.3136	1.90972	0.644842	2.96154	0.00306109	0.0388237
AT3G28300	7.4321	4.2536	1.44116	2.95151	0.0031622	0.0397999
AT4G20320	107.797	1.1912	0.403634	2.95119	0.00316547	0.0397999
AT4G26830	16.0704	-1.94042	0.657519	-2.95111	0.0031663	0.0397999
AT5G47500	973.494	1.03397	0.35033	2.95143	0.00316305	0.0397999
AT2G44480	25.6552	-2.05563	0.697006	-2.94923	0.00318569	0.0399781
AT5G06540	23.5224	1.39432	0.472968	2.94802	0.00319815	0.0401097
AT5G20960	429.603	-1.11702	0.379007	-2.94723	0.0032064	0.0401633
AT3G61060	228.63	-1.61139	0.546926	-2.94628	0.00321626	0.0402371
AT5G59490	5.30491	5.02813	1.70916	2.94188	0.00326229	0.0405871
AT3G28290	8.86062	3.37096	1.14827	2.93569	0.00332802	0.041278
AT5G40990	20.8388	-4.10464	1.39861	-2.9348	0.00333761	0.0413716
AT2G44260	7.09758	4.15978	1.41937	2.93074	0.0033816	0.0417634
AT3G26790	27.6629	1.57637	0.539079	2.92419	0.00345354	0.0423933
AT5G15430	11.5788	1.86315	0.63808	2.91993	0.00350108	0.0428729
AT1G49200	34.3227	-2.01685	0.691184	-2.91796	0.00352332	0.0430973
AT2G25200	196.805	-1.73834	0.595743	-2.91793	0.00352367	0.0430973
AT3G48100	61.1491	-1.89564	0.649929	-2.91669	0.00353763	0.043242
AT3G56250	33.9815	1.02965	0.353164	2.91551	0.00355103	0.0433534
AT2G44790	84.8872	-1.48281	0.509239	-2.91181	0.00359344	0.043713
ATMG00120	2.65877	-5.073	1.74317	-2.91022	0.00361175	0.0438303
AT1G76790	283.633	1.09927	0.378385	2.90517	0.00367057	0.0442172
AT5G13580	18.4714	2.61096	0.899273	2.90341	0.0036912	0.0443689
AT3G49410	28.5517	-1.77623	0.612332	-2.90075	0.00372267	0.0446676
AT4G19420	2107.05	-1.29929	0.447999	-2.90021	0.0037291	0.0447182
AT3G50390	10.6837	2.62564	0.906092	2.89776	0.00375842	0.0449633
AT1G17147	84.1454	-1.98618	0.686895	-2.89153	0.00383376	0.0457565
AT2G20800	7.63837	5.01103	1.73361	2.89052	0.00384601	0.045825
AT5G65730	2218.51	-1.45768	0.504906	-2.88703	0.00388895	0.0461605
AT5G61290	258.602	1.06004	0.367427	2.88502	0.00391384	0.0463297
AT1G09500	35.4828	2.54442	0.885256	2.87421	0.00405034	0.0475287
AT1G76960	1337.15	1.56052	0.543287	2.87236	0.00407421	0.0477534
AT2G18050	1325.91	1.61477	0.562424	2.87109	0.00409058	0.0478405
AT3G28270	704.844	1.71955	0.599814	2.8668	0.00414641	0.0482921
AT3G23730	465.352	-1.00297	0.350256	-2.86354	0.00418941	0.0486529
AT5G19100	10.3306	2.76452	0.965943	2.86199	0.00420986	0.0488064
AT3G54870	11.9035	1.96508	0.68886	2.85266	0.00433552	0.049977
