# Supplementary material for: Transcriptome-derived networks reconstruct distinct immune strategies under different iron availability between Arabidopsis and rice
Source: Research Square preprint supplement (doi:10.21203/rs.3.rs-3214423/v1), 2024-07-15
Supplement: Supplementary file 2 [file 28670257828b934d82ff079f.xlsx]

## Sheet: Supplementary Data 13
Specific AthTF	Description	Common AthTF	Description	Specific OsTF	Description	Common OsTF	Description
AT1G74930	ETHYLENE-RESPONSIVE TRANSCRIPTION FACTOR ERF018	AT1G29860	WRKY TRANSCRIPTION FACTOR 71	Os01g0196300	-	Os05g0195700	-
AT5G04150	TRANSCRIPTION FACTOR ORG2-RELATED	AT5G14750	TRANSCRIPTION FACTOR WER	Os01g0218100	-	Os09g0434500	-
AT4G17500	ETHYLENE-RESPONSIVE TRANSCRIPTION FACTOR 1A	AT5G67411	-	Os01g0292900	SQUAMOSA PROMOTER-BINDING-LIKE PROTEIN 1	Os01g0246700	-
AT3G02990	HEAT STRESS TRANSCRIPTION FACTOR A-1E	AT5G43290	WRKY TRANSCRIPTION FACTOR 49-RELATED	Os01g0298400	-	Os05g0361700	-
AT3G01600	NAC DOMAIN CONTAINING PROTEIN 44-RELATED	AT2G43140	TRANSCRIPTION FACTOR BHLH129	Os01g0511000	LOB DOMAIN-CONTAINING PROTEIN 41-RELATED	Os03g0659700	-
AT3G09600	PROTEIN REVEILLE 8	AT4G37730	BZIP TRANSCRIPTION FACTOR-LIKE PROTEIN	Os01g0524500	MYBS1	Os04g0590400	-
AT4G17490	ETHYLENE-RESPONSIVE TRANSCRIPTION FACTOR 6	AT2G21650	-	Os01g0575200	BHLH041-RELATED	Os03g0183000	AP2 DOMAIN CONTAINING PROTEIN (PTHR31190:SF194)
AT1G67970	HEAT STRESS TRANSCRIPTION FACTOR A-8	AT1G13260	AP2_ERF AND B3 DOMAIN-CONTAINING TRANSCRIPTION FACTOR RAV1	Os01g0584900	-	Os03g0182800	AP2 DOMAIN CONTAINING PROTEIN, EXPRESSED (PTHR31190:SF488)
AT5G03720	HEAT STRESS TRANSCRIPTION FACTOR A-3	AT1G66230	TRANSCRIPTION FACTOR MYB20	Os01g0624700	DNA-BINDING PROTEIN WRKY3-LIKE	Os09g0286600	-
AT5G51190	ETHYLENE-RESPONSIVE TRANSCRIPTION FACTOR ERF105	AT1G25560	AP2_ERF AND B3 DOMAIN-CONTAINING TRANSCRIPTION REPRESSOR TEM1	Os01g0713600	B3 DOMAIN-CONTAINING FUS3	Os01g0140700	AP2_ERF AND B3 DOMAIN-CONTAINING PROTEIN OS01G0141000 (PTHR31140:SF56)
AT4G17460	HOMEOBOX-LEUCINE ZIPPER PROTEIN HAT1	AT3G62610	TRANSCRIPTION FACTOR MYB11-RELATED	Os01g0714800	-	Os01g0141000	AP2_ERF AND B3 DOMAIN-CONTAINING PROTEIN OS01G0141000 (PTHR31140:SF56)
AT3G58120	BASIC LEUCINE ZIPPER 34-RELATED	AT1G07050	-	Os01g0816100	NAC DOMAIN-CONTAINING PROTEIN 68	Os09g0287000	AP2_ERF DOMAIN PROTEIN (PTHR31190:SF492)
AT1G18330	DEUBIQUITINASE MYSM1	AT4G21440	TRANSCRIPTION FACTOR MYB102	Os01g0826400	WRKY PROTEIN 1-RELATED	Os08g0249000	B-BOX ZINC FINGER PROTEIN 22 (PTHR31832:SF68)
AT5G47230	ETHYLENE-RESPONSIVE TRANSCRIPTION FACTOR 5	AT3G11580	TF-B3 DOMAIN-CONTAINING PROTEIN	Os01g0867300	BZIP 12	Os02g0132500	BZIP 2 (PTHR45764:SF76)
AT4G25490	DEHYDRATION-RESPONSIVE ELEMENT-BINDING PROTEIN 1A-RELATED	AT2G37260	WRKY TRANSCRIPTION FACTOR 44	Os01g0928000	SCREAM2	Os02g0178100	C2C2-CO-LIKE (PTHR31319:SF119)
AT3G24520	HEAT STRESS TRANSCRIPTION FACTOR C-1	AT4G39780	ETHYLENE-RESPONSIVE TRANSCRIPTION FACTOR ERF060	Os01g0935000	-	Os03g0820300	-
AT2G36270	PROTEIN ABSCISIC ACID-INSENSITIVE 5	AT5G67450	ZINC FINGER PROTEIN AZF1	Os02g0139000	MYB FAMILY PHL6	Os03g0711100	CCT MOTIF FAMILY PROTEIN, EXPRESSED (PTHR31874:SF57)
AT3G55980	ZINC FINGER CCCH DOMAIN-CONTAINING PROTEIN 47	AT1G69490	NAC TRANSCRIPTION FACTOR 29	Os02g0174300	-	Os09g0522200	DEHYDRATION-RESPONSIVE ELEMENT-BINDING PROTEIN 1A (PTHR31839:SF10)
AT1G18710	MYB TRANSCRIPTION FACTOR	AT1G80840	WRKY TRANSCRIPTION FACTOR 40-RELATED	Os02g0221100	-	Os05g0473300	DEHYDRATION-RESPONSIVE ELEMENT-BINDING PROTEIN 2E (PTHR31241:SF62)
AT5G61600	ETHYLENE-RESPONSIVE TRANSCRIPTION FACTOR ERF104	AT5G56840	MYB DOMAIN PROTEIN	Os02g0233200	BES1_BZR1 HOMOLOG PROTEIN 4	Os07g0617000	EREB
AT5G05790	HTH MYB-TYPE DOMAIN-CONTAINING PROTEIN	AT1G27730	ZINC FINGER PROTEIN ZAT10	Os02g0285900	-	Os04g0550200	ETHYLENE-RESPONSIVE
AT2G43000	TRANSCRIPTION FACTOR JUNGBRUNNEN 1	AT1G75250	PROTEIN RADIALIS-LIKE 6	Os02g0564700	-	Os06g0166400	ETHYLENE-RESPONSIVE
AT2G26150	HEAT STRESS TRANSCRIPTION FACTOR A-2	AT1G64380	ETHYLENE-RESPONSIVE TRANSCRIPTION FACTOR ERF061	Os02g0579000	-	Os02g0656600	ETHYLENE-RESPONSIVE
AT5G48250	ZINC FINGER PROTEIN CONSTANS-LIKE 10	AT2G40750	WRKY TRANSCRIPTION FACTOR 54-RELATED	Os02g0603600	-	Os02g0654700	ETHYLENE-RESPONSIVE 1 (PTHR31190:SF479)
AT1G04990	ZINC FINGER CCCH DOMAIN-CONTAINING PROTEIN 3	AT5G25390	ETHYLENE-RESPONSIVE TRANSCRIPTION FACTOR SHINE 3	Os02g0638650	ETHYLENE-RESPONSIVE ERF053	Os05g0569300	G-BOX-BINDING FACTOR 3 (PTHR45967:SF1)
AT4G39250	PROTEIN RADIALIS-LIKE 1	AT2G38300	HOMEODOMAIN-LIKE SUPERFAMILY PROTEIN-RELATED	Os02g0706600	ZINC-FINGER HOMEODOMAIN PROTEIN 7	Os04g0557800	GLABRA 3 (PTHR46266:SF3)
AT5G28770	BASIC LEUCINE ZIPPER 63	AT3G16770	ETHYLENE-RESPONSIVE TRANSCRIPTION FACTOR RAP2-3	Os02g0806300	-	Os07g0178600	HEAT STRESS A-7A (PTHR10015:SF322)
AT1G01250	ETHYLENE-RESPONSIVE TRANSCRIPTION FACTOR ERF023	AT1G68840	AP2_ERF AND B3 DOMAIN-CONTAINING TRANSCRIPTION REPRESSOR RAV2	Os03g0109000	CONTAINING PROTEIN 21_22, PUTATIVE, EXPRESSED-RELATED	Os08g0546800	HEAT STRESS B-2B (PTHR10015:SF169)
AT1G19510	PROTEIN RADIALIS-LIKE 5	AT2G46830	PROTEIN CCA1	Os03g0113500	-	Os01g0625300	HEAT STRESS C-1 (PTHR10015:SF332)
AT1G56650	TRANSCRIPTION FACTOR MYB113-RELATED	AT2G47890	ZINC FINGER PROTEIN CONSTANS-LIKE 13	Os03g0135700	BHLH3	Os05g0579600	-
AT5G61590	ETHYLENE-RESPONSIVE TRANSCRIPTION FACTOR ERF107	AT2G46680	HOMEOBOX-LEUCINE ZIPPER PROTEIN ATHB-7	Os03g0164300	-	Os02g0732600	-
AT5G67190	ETHYLENE-RESPONSIVE TRANSCRIPTION FACTOR ERF010	AT2G23290	-	Os03g0183200	-	Os05g0579700	-
AT1G18570	TRANSCRIPTION FACTOR MYB51	AT2G46270	G-BOX-BINDING FACTOR 3	Os03g0188400	BHLH96	Os02g0187700	-
AT4G23810	WRKY TRANSCRIPTION FACTOR 53-RELATED	AT4G01720	WRKY TRANSCRIPTION FACTOR 47-RELATED	Os03g0327800	DOMAIN TRANSCRIPTION FACTOR, PUTATIVE, EXPRESSED-RELATED	Os05g0488600	-
AT4G36570	-	AT3G02380	ZINC FINGER PROTEIN CONSTANS-LIKE 2	Os03g0445700	DOMAIN PROTEIN 37, PUTATIVE, EXPRESSED-RELATED	Os02g0649300	HOMEOBOX-LEUCINE ZIPPER PROTEIN ATHB-7 (PTHR24326:SF122)
AT4G25480	DEHYDRATION-RESPONSIVE ELEMENT-BINDING PROTEIN 1A-RELATED	AT4G09820	TRANSCRIPTION FACTOR TT8	Os03g0609500	DOMAIN PROTEIN 40, PUTATIVE, EXPRESSED-RELATED	Os03g0198600	HOMEOBOX-LEUCINE ZIPPER PROTEIN HOX12 (PTHR24326:SF545)
AT1G06160	ETHYLENE-RESPONSIVE TRANSCRIPTION FACTOR ERF094	AT1G49560	TRANSCRIPTION FACTOR HHO6	Os03g0666300	HOMEODOMAIN-LIKE SUPERFAMILY PROTEIN-RELATED	Os04g0541700	HOMEOBOX-LEUCINE ZIPPER PROTEIN HOX22 (PTHR24326:SF234)
AT5G24110	WRKY TRANSCRIPTION FACTOR 30-RELATED	AT2G22800	HOMEOBOX-LEUCINE ZIPPER PROTEIN HAT9	Os03g0764900	DOF ZINC FINGER PROTEIN DOF4.3-RELATED	Os02g0149900	HOMEOBOX-LEUCINE ZIPPER PROTEIN HOX26-RELATED (PTHR45714:SF1)
AT5G46830	TRANSCRIPTION FACTOR BHLH28	AT4G06746	ETHYLENE-RESPONSIVE TRANSCRIPTION FACTOR ERF011-RELATED	Os03g0815100	NAC DOMAIN-CONTAINING PROTEIN 2	Os08g0416000	HOMEOBOX-LEUCINE ZIPPER PROTEIN HOX5 (PTHR24326:SF215)
AT1G47655	DOF ZINC FINGER PROTEIN DOF1.6	AT3G04420	NAC DOMAIN-CONTAINING PROTEIN 3-RELATED	Os03g0821200	-	Os01g0192300	-
AT3G13960	GROWTH-REGULATING FACTOR 5	AT3G51910	HEAT STRESS TRANSCRIPTION FACTOR A-7A	Os03g0860100	ETHYLENE-RESPONSIVE ERF096	Os12g0586300	MYB-LIKE DNA-BINDING DOMAIN, SHAQKYF CLASS FAMILY PROTEIN, EXPRESSED (PTHR31003:SF45)
AT4G36260	PROTEIN SHI RELATED SEQUENCE 2	AT2G28500	LOB DOMAIN-CONTAINING PROTEIN 11	Os04g0493000	-	Os01g0695900	MYB-RELATED PROTEIN 1-LIKE (PTHR47998:SF39)
AT3G27650	LOB DOMAIN-CONTAINING PROTEIN 25	AT3G11020	DEHYDRATION-RESPONSIVE ELEMENT-BINDING PROTEIN 2B	Os04g0515900	-	Os02g0695200	MYB-RELATED PROTEIN ZM1 (PTHR10641:SF596)
AT4G38000	DOF ZINC FINGER PROTEIN DOF4.7			Os04g0540200	-	Os01g0305900	MYB11-RELATED (PTHR47999:SF118)
AT1G73830	TRANSCRIPTION FACTOR BEE 3			Os04g0546800	ETHYLENE-RESPONSIVE 2	Os04g0517100	MYB14 (PTHR10641:SF541)
AT5G59820	ZINC FINGER PROTEIN ZAT12			Os04g0569100	HOMEOBOX-LEUCINE ZIPPER PROTEIN ANTHOCYANINLESS 2-RELATED	Os02g0624300	MYB15 (PTHR10641:SF1341)
AT1G16640	BNAC05G12720D PROTEIN			Os04g0610400	-	Os03g0720800	MYB52 (PTHR45614:SF256)
AT2G37430	ZINC FINGER PROTEIN ZAT11			Os05g0183100	WRKY DOMAIN-CONTAINING PROTEIN	Os01g0975300	MYB74 (PTHR10641:SF1232)
AT4G24150	GROWTH-REGULATING FACTOR 8			Os05g0343400	-	Os07g0558100	MYB74 (PTHR10641:SF1232)
AT1G62975	TRANSCRIPTION FACTOR BHLH125			Os05g0426200	NAC DOMAIN CONTAINING PROTEIN 103	Os10g0562100	MYBS2 (PTHR44191:SF70)
AT2G03710	AGAMOUS-LIKE MADS-BOX PROTEIN AGL3			Os05g0442700	NAC 12	Os03g0133000	NAC DOMAIN CONTAINING PROTEIN 36 (PTHR31989:SF132)
AT2G24700	B3 DOMAIN-CONTAINING PROTEIN REM10			Os05g0444200	-	Os06g0728700	SWI/SNF
AT4G31620	-			Os05g0474800	-	Os07g0680400	-
AT5G56780	PROTEIN EFFECTOR OF TRANSCRIPTION 2-RELATED			Os05g0500600	-	Os09g0334500	-
AT1G26945	TRANSCRIPTION FACTOR PRE6			Os05g0525900	ZINC FINGER CCCH DOMAIN-CONTAINING PROTEIN 10	Os01g0185900	-
AT2G28160	TRANSCRIPTION FACTOR FER-LIKE IRON DEFICIENCY-INDUCED TRANSCRIPTION FACTOR			Os05g0536250	-	Os03g0657400	-
AT2G29660	C2H2-TYPE DOMAIN-CONTAINING PROTEIN			Os05g0537100	WRKY 50-RELATED	Os04g0489600	-
AT3G05690	NUCLEAR TRANSCRIPTION FACTOR Y SUBUNIT A-2			Os05g0553400	-	Os02g0181300	WRKY 40-RELATED (PTHR31429:SF3)
AT1G46480	WUSCHEL-RELATED HOMEOBOX 4			Os05g0565900	-	Os08g0386200	WRKY 41-RELATED (PTHR32096:SF36)
AT4G20970	TRANSCRIPTION FACTOR BHLH162			Os05g0572000	ETHYLENE-RESPONSIVE ERF061	Os06g0649000	WRKY WRKY28 (PTHR31429:SF33)
AT3G26790	B3 DOMAIN-CONTAINING TRANSCRIPTION FACTOR FUS3			Os06g0226500	ILI4	Os09g0417600	WRKY WRKY76 (PTHR31429:SF108)
AT3G06160	B3 DOMAIN-CONTAINING PROTEIN REM21			Os06g0284500	-	Os05g0322900	WRKY45-1 (PTHR31282:SF14)
AT3G54390	SEQUENCE-SPECIFIC DNA BINDING TRANSCRIPTION FACTOR			Os06g0519400	ZINC FINGER CCCH DOMAIN-CONTAINING PROTEIN 58	Os03g0764100	ZINC FINGER PROTEIN 1 (PTHR45988:SF88)
AT2G22770	TRANSCRIPTION FACTOR NAI1			Os06g0562300	HOMEOBOX PROTEIN ATH1	Os03g0437200	ZINC FINGER PROTEIN 36 (PTHR45988:SF16)
AT2G31730	TRANSCRIPTION FACTOR BHLH154			Os06g0662200	BZIP RISBZ5	Os09g0509700	ZINC FINGER PROTEIN CONSTANS-LIKE 14-RELATED (PTHR31717:SF45)
				Os06g0663500	SQUAMOSA PROMOTER-BINDING-LIKE PROTEIN 11	Os02g0823900	ZINC FINGER PROTEIN ZAT5 (PTHR26374:SF452)
				Os06g0703900	MYB FAMILY PHL6	Os09g0379600	-
				Os06g0726300	-
				Os07g0158500	NUCLEAR Y SUBUNIT
				Os07g0225300	NAC DOMAIN-CONTAINING PROTEIN 67
				Os07g0410300	-
				Os07g0683200	-
				Os07g0688200	MYB TRANSCRIPTION FACTOR-RELATED
				Os08g0159500	PROTEIN LOL1
				Os08g0174500	NUCLEAR Y SUBUNIT B-2
				Os08g0357300	-
				Os08g0436700	-
				Os08g0442400	-
				Os08g0485700	LD18634P
				Os08g0504000	ZINC FINGER PROTEIN WIP2
				Os08g0536800	-
				Os08g0537900	O-FUCOSYLTRANSFERASE 13
				Os08g0562300	PROTEIN SENSITIVE TO PROTON RHIZOTOXICITY 2
				Os09g0309700	-
				Os09g0410700	-
				Os09g0431900	-
				Os09g0455300	HEC3
				Os09g0474000	BZIP 2
				Os09g0481700	-
				Os09g0549450	NLP
				Os09g0572000	-
				Os10g0376900	HELIX-LOOP-HELIX DNA-BINDING DOMAIN CONTAINING PROTEIN, EXPRESSED
				Os10g0444100	MYB-LIKE DNA-BINDING DOMAIN CONTAINING PROTEIN, EXPRESSED
				Os10g0490400	-
				Os10g0536100	MYOCYTE-SPECIFIC ENHANCER FACTOR 2
				Os10g0551200	-
				Os10g0560700	-
				Os10g0562900	-
				Os11g0175700	-
				Os11g0490900	WRKY 75-RELATED
				Os11g0603000	ILI2
				Os11g0684000	JAMYB
				Os11g0705200	-
				Os11g0707300	-
				Os12g0105600	-
				Os12g0156100	NAC DOMAIN-CONTAINING PROTEIN 90
				Os12g0515500	ZINC FINGER CCCH DOMAIN-CONTAINING PROTEIN 67
				Os12g0592300	B3 DOMAIN-CONTAINING PROTEIN OS12G0592300
				Os12g0612700	HOMEOBOX-LEUCINE ZIPPER PROTEIN HOX33
