# Supplementary material for: Transcriptome-derived networks reconstruct distinct immune strategies under different iron availability between Arabidopsis and rice
Source: Research Square preprint supplement (doi:10.21203/rs.3.rs-3214423/v1), 2024-07-15
Supplement: Supplementary file 3 [file 41d680243ba615802a543724.xlsx]

## Sheet: Loadings
Arabidopsis			Rice
5% positive top loadings PC2	5% negative top loadings PC2		5% positive top loadings PC2	5% negative top loadings PC2
AT1G70710	AT1G12310		Os01g0781000	Os12g0425600
AT3G16750	AT5G18110		Os10g0574700	Os08g0554100
AT4G30800	AT1G76135		Os03g0180800	Os04g0376500
AT3G13235	AT3G25780		Os10g0101100	Os07g0612400
AT1G19430	AT5G56170		Os02g0324300	Os01g0978000
AT2G40805	AT3G50190		Os10g0207400	Os09g0547200
AT4G08470	AT2G26770		Os10g0401000	Os10g0457400
AT1G22040	AT5G13090		Os10g0330400	Os04g0506300
AT1G67410	AT2G11000		Os12g0552500	Os06g0729400
AT1G80360	AT2G32290		Os11g0634200	Os04g0485300
AT4G08390	AT3G29575		Os02g0573500	Os03g0118900
AT4G37470	AT1G63930		Os02g0224100	Os01g0888600
AT1G19790	AT4G16420		Os01g0202500	Os06g0201200
AT3G02210	AT3G53460		Os07g0601100	Os01g0598600
AT1G23340	AT2G40740		Os02g0826400	Os01g0618400
AT1G63740	AT1G21410		Os01g0866100	Os04g0350201
AT3G20600	AT3G09410		Os05g0164800	Os02g0757700
AT4G15740	AT1G27510		Os09g0468300	Os12g0590500
AT1G49050	AT5G19830		Os07g0623100	Os03g0312100
AT1G20110	AT1G56700		Os09g0570500	Os05g0466900
AT5G45080	AT3G04690		Os06g0612800	Os02g0528550
AT3G04410	AT5G47520		Os05g0127500	Os11g0233800
AT3G62260	AT4G19430		Os07g0674300	Os04g0586700
AT3G43670	AT3G60440		Os09g0517900	Os09g0252100
AT5G41390	AT4G22340		Os11g0704500	Os11g0544100
AT3G27060	AT2G35765		Os03g0239300	Os01g0763900
AT1G60390	AT5G40860		Os04g0587300	Os10g0463200
AT3G45770	AT2G02930		Os11g0629300	Os03g0636800
AT5G60200	AT5G01800		Os05g0463800	Os01g0709000
AT5G16610	AT1G08520		Os02g0745700	Os07g0606900
AT1G24030	AT1G73580		Os06g0681000	Os02g0564300
AT1G67000	AT1G23935		Os11g0100100	Os11g0450400
AT4G15390	AT4G15800		Os10g0161700	Os09g0566600
AT3G55240	AT1G33930		Os04g0497350	Os12g0284250
AT3G61650	AT1G02500		Os02g0266800	Os03g0355600
AT2G02835	AT1G17680		Os08g0484600	Os04g0647425
AT1G08460	AT3G05150		Os08g0139400	Os10g0578300
AT1G08160	AT1G75800		Os05g0514300	Os02g0699700
AT1G10700	AT4G32720		Os01g0635200	Os03g0246100
AT5G54870	AT3G01390		Os01g0222600	Os08g0304900
AT1G30840	AT3G52480		Os05g0522700	Os12g0290600
AT5G10860	AT1G72390		Os08g0550400	Os09g0487200
AT5G01100	AT1G51110		Os03g0674900	Os11g0490800
AT1G10585	AT1G07320		Os12g0507350	Os01g0191800
AT1G30040	AT1G74700		Os06g0633100	Os06g0209300
AT1G09310	AT4G18280		Os01g0959200	Os09g0444600
AT5G62940	AT2G10450		Os04g0206700	Os04g0582900
AT1G03370	AT5G51930		Os01g0794500	Os07g0558200
AT2G19990	AT5G53895		Os05g0414501	Os04g0625800
AT1G29520	AT4G19030		Os06g0604600	Os03g0299900
AT5G13020	AT5G39110		Os01g0653300	Os03g0161900
AT4G35790	AT5G52340		Os05g0134200	Os12g0633200
AT1G80080	AT4G26610		Os07g0589400	Os07g0627000
AT1G07500	AT4G22758		Os02g0711300	Os07g0523600
AT1G07720	AT5G04080		Os01g0847200	Os02g0700600
AT4G13250	AT2G43150		Os03g0132200	Os02g0165500
AT3G60490	AT1G61720		Os02g0455400	Os08g0113100
AT1G08210	AT4G39900		Os08g0469600	Os04g0611700
AT1G01380	AT1G19690		Os08g0277900	Os01g0788800
AT2G16440	AT4G36590		Os11g0210201	Os08g0191200
AT1G73030	AT3G60850		Os07g0275300	Os03g0442900
AT3G05970	AT2G24060		Os05g0420000	Os06g0318300
AT3G47550	AT4G25890		Os03g0200200	Os08g0485500
AT3G53100	AT3G05880		Os12g0544600	Os07g0124700
AT3G42670	AT1G63340		Os01g0830500	Os01g0926700
AT1G48698	AT1G48610		Os01g0527700	Os05g0521300
AT5G53990	AT3G11680		Os02g0462800	Os02g0104700
AT2G27600	AT5G67360		Os04g0455401	Os08g0361000
AT1G13120	AT1G12940		Os01g0235900	Os05g0418800
AT1G05740	AT5G51790		Os06g0711600	Os02g0814600
AT3G01670	AT3G18295		Os05g0431266	Os04g0410250
AT3G57072	AT1G46554		Os04g0498400	Os01g0822900
AT4G08867	AT3G04760		Os12g0182300	Os02g0739700
AT1G13605	AT1G54140		Os12g0466200	Os03g0319200
AT4G28690	AT5G07370		Os03g0266300	Os02g0164000
AT4G12870	AT4G37520		Os03g0833600	Os11g0550300
AT3G27906	AT5G60730		Os01g0530650	Os10g0508100
AT3G58640	AT5G03110		Os05g0579100	gene-atpI
AT5G54080	AT4G30950		Os03g0285200	Os08g0154000
AT5G49890	AT5G64960		Os01g0881800	Os02g0600100
AT3G28780	AT1G74630		Os09g0478600	Os03g0234350
AT1G75560	AT3G09520		Os06g0174300	Os04g0487100
AT5G49310	AT3G10700		Os06g0303800	Os10g0501200
AT3G23170	AT2G02060		Os01g0725000	Os05g0177800
AT4G37190	AT1G30290		Os03g0348800	Os02g0775400
AT2G39270	AT5G21910		Os03g0582200	Os02g0109900
AT2G28880	AT2G47200		Os03g0835400	Os03g0804800
AT4G04770	AT3G14240		Os03g0237100	Os09g0480400
AT3G17810	AT3G47730		Os04g0508800	Os07g0679500
AT4G33360	AT3G06360		Os12g0107500	Os01g0273100
AT2G46495	AT4G31520		Os07g0584100	Os11g0146800
AT5G63740	AT4G00200		Os08g0120600	Os04g0401300
AT1G13210	AT4G20140		Os04g0320700	Os09g0469400
AT2G37590	AT4G30910		Os07g0179400	Os01g0167900
AT5G66740	AT5G38450		Os06g0644100	Os05g0358000
AT5G19250	AT1G55840		Os03g0795800	Os11g0148500
AT1G04510	AT2G29500		Os02g0624400	Os06g0301400
AT2G28315	AT3G09440		Os11g0170400	Os12g0129400
AT1G21080	AT3G52370		Os02g0633300	Os03g0795600
AT2G01120	AT1G67940		Os06g0682300	Os06g0168600
AT2G34680	AT3G05410		Os06g0665500	Os01g0227200
AT2G42590	AT4G16240		Os01g0795766	Os05g0171000
AT5G35980	AT1G18670		Os09g0512900	Os03g0200600
AT2G16980	AT1G15280		Os05g0138300	Os06g0704500
AT4G09060	AT4G20740		Os05g0360400	Os04g0527800
AT5G39000	AT4G12545		Os08g0408200	Os01g0805975
AT4G26365	AT1G27695		Os06g0718400	Os10g0577400
AT5G13910	AT3G43790		Os09g0502350	Os07g0462800
AT3G26580	AT5G62210		Os11g0161166	Os01g0654100
AT1G09940	AT5G16810		Os05g0564800	Os04g0530050
AT5G24200	AT1G71770		Os05g0399100	Os07g0501700
AT1G18880	AT3G10380		Os01g0131800	Os02g0529900
AT4G24120	AT3G29410		Os11g0153300	Os09g0560000
AT5G05310	AT5G58600		Os03g0225200	Os04g0685200
AT4G03410	AT2G42120		Os10g0409900	Os08g0244100
AT2G14960	AT3G18020		Os11g0156700	Os05g0235800
AT2G27740	AT3G13860		Os07g0175700	Os04g0447950
AT5G61210	AT5G63560		Os04g0634900	Os12g0554800
AT3G07060	AT5G60400		Os08g0205400	Os09g0505300
AT2G20570	AT2G46450		Os11g0112300	Os01g0315600
AT3G55390	AT5G12970		Os03g0159900	Os11g0216400
AT4G13840	AT5G07620		Os03g0736700	Os03g0131200
AT3G50230	AT3G13240		Os01g0197400	Os03g0143800
AT3G24770	AT3G58470		Os11g0182200	Os05g0151000
AT5G06310	AT3G23090		Os02g0668500	Os12g0433500
AT5G41060	AT4G38840		Os08g0502700	Os01g0259400
AT1G65550	AT1G22530		Os05g0318300	Os05g0104000
AT1G13990	AT1G19440		Os03g0289100	Os08g0496400
AT4G36750	AT3G03980		Os07g0661700	Os04g0516200
AT3G56980	AT1G69520		Os03g0808600	Os07g0689800
AT3G61090	AT5G35220		Os07g0621600	Os07g0694325
AT1G78390	AT1G04660		Os05g0526800	Os03g0683800
AT2G44700	AT3G19960		Os05g0562200	Os05g0459700
AT1G69587	AT3G18310		Os01g0708500	Os05g0459400
AT4G24015	AT3G13898		Os01g0824000	Os07g0520100
AT2G45070	AT1G33811		Os08g0518000	Os05g0219900
AT1G74770	AT5G22920		Os03g0564200	Os01g0811001
AT4G19860	AT2G25540		Os01g0882300	Os06g0312900
AT1G77520	AT2G38330		Os09g0130700	Os04g0432800
AT1G09440	AT4G33950		Os04g0460350	Os06g0554300
AT2G23450	AT5G57565		Os05g0449500	Os01g0147700
AT4G23515	AT3G46720		Os08g0270800	Os08g0280600
AT4G27610	AT4G21680		Os06g0704700	Os08g0156600
AT5G59950	AT2G46270		Os07g0267300	Os06g0110400
AT1G09230	AT2G43940		Os12g0611000	Os01g0133866
AT5G08440	AT1G30500		Os06g0295900	Os12g0409900
AT2G04690	AT4G19830		Os08g0557200	Os10g0407100
AT4G12780	AT3G02140		Os12g0133400	Os08g0469500
AT4G11150	AT1G61360		Os04g0578200	Os01g0844400
AT3G13190	AT3G08910		Os03g0684800	Os07g0589200
AT5G62740	AT3G50970		Os01g0551100	Os12g0158300
AT2G18876	AT2G24500		Os08g0557000	Os06g0660700
AT5G49980	AT1G71490		Os08g0543051	Os03g0744501
AT3G56310	AT4G24480		Os10g0100700	Os06g0275900
AT5G38470	AT2G32230		Os11g0551800	Os08g0494200
AT3G61897	AT5G48430		Os06g0133400	Os08g0162700
AT1G45616	AT3G26445		Os04g0534500	Os08g0510900
AT3G25880	AT2G10921		Os01g0192000	Os01g0801000
AT4G28811	AT4G27520		Os05g0105800	Os01g0577450
AT4G17830	AT2G31865		Os07g0582400	Os01g0821800
AT2G17210	AT1G47915		Os02g0752800	Os03g0705300
AT2G37920	AT3G01490		Os11g0414000	Os09g0537200
AT2G46690	AT1G53345		Os05g0202300	Os08g0561600
AT3G51890	AT2G46860		Os08g0137400	Os06g0561200
AT1G61440	ATCG00200		Os01g0869200	Os01g0956600
AT1G66020	AT3G11630		Os02g0578800	Os04g0412900
AT2G42830	AT3G11750		Os02g0696600	Os08g0525700
AT4G31970	AT1G70140		Os03g0358100	Os01g0805600
AT1G26450	AT3G09270		Os09g0482740	Os12g0507400
AT3G46110	AT3G47950		Os11g0172300	Os09g0422500
AT2G19790	AT3G11760		Os02g0121600	Os03g0777600
AT5G53330	AT5G66270		Os04g0687100	Os12g0603800
AT1G01453	AT2G18860		Os06g0239700	Os07g0599100
AT2G46290	AT5G62790		Os03g0765100	Os03g0114000
AT1G01190	AT1G14310		Os05g0586500	Os08g0210300
AT2G44520	AT4G39380		Os07g0597100	Os12g0116000
AT4G35350	AT5G65530		Os08g0440300	Os08g0191700
AT3G59190	AT1G76990		Os08g0175200	Os07g0637600
AT4G22810	AT1G80390		Os05g0513400	Os04g0649400
AT5G15940	AT2G29980		Os12g0114000	Os08g0386700
AT2G02040	AT3G46030		Os03g0792900	Os02g0326200
AT3G56540	AT2G44010		Os03g0264150	Os02g0808100
AT3G61310	AT4G00985		Os03g0749000	Os02g0317400
AT3G50830	AT4G32580		Os08g0114250	Os11g0213600
AT1G31050	AT2G30100		Os01g0253900	Os12g0600701
AT2G01950	AT3G06400		Os01g0795832	Os10g0531700
AT4G23860	AT5G62030		Os12g0639100	Os08g0561500
AT5G37180	AT4G27700		Os04g0226600	Os09g0568266
AT1G80400	AT2G34010		Os02g0606200	Os01g0605500
AT5G44290	AT1G60870		Os12g0484700	Os04g0452500
AT3G14160	AT1G02250		Os04g0430600	Os01g0963800
AT1G20225	AT1G35510		Os05g0188100	Os01g0856600
AT3G27380	AT3G51020		Os02g0126000	Os11g0242600
AT1G60950	AT5G19430		Os09g0314400	Os02g0781350
AT5G65570	AT3G57340		Os02g0684400	Os12g0578600
AT5G64980	AT1G71370		Os04g0349300	Os08g0433100
AT5G51720	AT2G38790		Os03g0708400	Os07g0136800
AT3G14170	AT3G12610		Os09g0572900	Os08g0446200
AT2G34985	AT1G01160		Os04g0361500	Os06g0134700
AT5G48520	AT4G34880		Os01g0779100	Os11g0580000
AT2G31880	AT1G76110		Os10g0113900	Os01g0577600
AT4G24940	AT5G55260		Os07g0152800	Os09g0506800
AT4G11000	AT2G42485		Os03g0799801	Os09g0516700
AT1G48820	AT3G51540		Os12g0224500	Os09g0440200
AT1G01695	AT1G50890		Os10g0155300	Os07g0439100
AT2G38430	AT3G60740		Os01g0723400	Os09g0364800
AT5G17170	AT4G03430		Os03g0189300	Os06g0213700
AT4G15475	AT5G50550		Os03g0302000	Os05g0148300
AT5G19530	AT4G11670		Os06g0206200	Os06g0639200
AT5G04890	AT1G71696		Os04g0649500	Os11g0107700
AT5G14780	AT5G51690		Os09g0337300	Os12g0538300
AT3G56050	AT1G23500		Os09g0120033	Os01g0236400
AT3G20410	AT3G56880		Os07g0162400	Os01g0221700
AT3G60540	AT2G24170		Os10g0500700	Os06g0300600
AT5G15845	AT1G64380		Os06g0695800	Os01g0631400
AT5G02470	AT1G52990		Os01g0149350	Os01g0923200
AT5G10840	AT5G65575		Os01g0915000	Os11g0143500
AT5G24930	AT1G08070		Os06g0150600	Os05g0147400
AT2G22420	AT2G01670		Os07g0646600	Os11g0109000
AT2G24030	AT1G48180		Os06g0211600	Os06g0187000
AT1G03200	AT4G21200		Os07g0664000	Os05g0497150
AT2G15730	AT1G22100		Os05g0163700	Os02g0830700
AT2G41705	AT1G12810		Os06g0207700	Os01g0756900
AT1G13608	AT1G79075		Os02g0640800	Os12g0191400
AT2G26500	AT5G06630		Os07g0546200	Os09g0510900
AT3G55360	ATCG00810		Os05g0199700	Os03g0566500
AT3G62500	AT1G01770		Os01g0795600	Os02g0511901
AT4G28300	AT1G80190		Os03g0223550	Os08g0359100
AT5G21060	AT2G41660		Os04g0551600	Os01g0323000
AT1G68330	AT5G56030		Os03g0688300	Os04g0504200
AT1G77930	AT5G65830		Os12g0581600	Os01g0558800
AT3G16610	AT5G25970		Os01g0387133	Os03g0797800
AT4G18990	AT5G16440		Os09g0417800	Os04g0185100
AT1G28680	AT3G62470		Os04g0668900	Os02g0158800
AT5G39330	AT1G57765		Os09g0119100	Os04g0446401
AT3G07170	AT2G30660		Os02g0639800	Os02g0332200
AT4G00370	AT1G69170		Os01g0167400	Os01g0513900
AT5G59210	AT3G26910		Os03g0382350	Os05g0397900
AT3G27890	AT5G14360		Os01g0642801	Os05g0420750
AT1G53910	AT5G04600		Os07g0236200	Os06g0705000
AT5G48175	AT1G48310		Os06g0236266	Os03g0650000
AT2G36460	AT5G16800		Os01g0214500	Os09g0401900
AT4G23650	AT5G57800		Os04g0551700	Os03g0736500
AT5G46280	AT2G06850		Os03g0748600	Os02g0494400
AT5G41950	AT1G23530		Os06g0476100	Os11g0147100
AT1G29270	AT5G21070		Os06g0557600	Os07g0517900
AT5G01750	AT1G30450		Os01g0588400	Os11g0130800
AT3G56970	AT1G28960		Os05g0179800	Os10g0546200
AT3G20060	AT3G11430		Os01g0955100	Os01g0232200
AT1G59900	AT1G15950		Os12g0428700	Os04g0412800
AT4G27320	AT1G54450		Os06g0239200	Os08g0316900
AT1G62320	AT4G35370		Os03g0118450	Os02g0776900
AT3G50470	AT1G36675		Os03g0324300	Os11g0544300
AT5G28050	AT3G48320		Os08g0559400	Os06g0186900
AT2G18960	AT1G69610		Os03g0244200	Os01g0149600
AT1G79490	AT1G28700		Os01g0692100	Os09g0548100
AT5G45070	AT3G18291		Os12g0458900	Os08g0130900
AT2G24690	AT5G02990		Os03g0570300	Os08g0496600
AT2G28780	AT1G25400		Os03g0706900	Os08g0479400
AT3G13170	AT5G17810		Os08g0500800	Os04g0665666
AT5G09250	AT5G48720		Os11g0670700	Os12g0432750
AT3G59010	AT4G12910		Os01g0143900	Os03g0750700
AT1G68650	AT4G36080		Os06g0147200	Os04g0653400
AT2G37900	AT1G52270		Os01g0766600	Os03g0210500
AT3G01680	AT3G18850		Os06g0208700	Os12g0159500
AT4G13370	AT2G46375		Os01g0539400	Os04g0106500
AT3G14140	AT2G24300		Os12g0209200	Os02g0554200
AT1G54200	AT5G15190		Os07g0256866	Os12g0528000
AT5G28390	AT4G15850		Os04g0517400	Os04g0488100
AT3G63080	AT5G49220		Os04g0287400	Os08g0266700
AT2G13790	AT4G01690		Os01g0159400	Os07g0639900
AT3G59420	AT5G10130		Os04g0462500	Os05g0158500
AT4G18950	AT5G59790		Os12g0179800	Os11g0640000
AT1G07300	AT1G80550		Os09g0272600	Os03g0282900
AT3G29360	AT4G19380		Os04g0151700	Os05g0459300
AT1G10130	AT3G45530		Os08g0554400	Os06g0611150
AT3G24640	AT5G56060		Os11g0668100	Os01g0651150
AT5G20540	AT5G14160		Os07g0644000	Os03g0399400
AT3G05810	AT3G25150		Os06g0152200	Os10g0466500
AT2G22910	AT5G14200		Os05g0390932	Os11g0121400
AT4G16150	AT1G60010		Os08g0357000	Os06g0217900
AT2G27340	AT4G36960		Os02g0206400	Os02g0179400
AT1G13607	AT3G30580		Os05g0510600	Os03g0303100
AT1G74660	AT3G13210		Os07g0468100	Os01g0544450
AT1G35530	AT1G33390		Os10g0525000	Os04g0685100
AT1G01070	AT3G27010		Os08g0483600	Os09g0411650
AT5G19930	AT1G31173		Os03g0357200	Os12g0131900
AT5G17370	AT5G64401		Os08g0173600	Os01g0547133
AT1G11310	AT3G53900		Os01g0721000	Os05g0476400
AT4G27852	AT1G01720		Os04g0457500	Os02g0773600
AT2G23840	AT3G48070		Os08g0467300	Os08g0360400
AT5G65210	AT4G16530		Os03g0157700	Os01g0283000
AT4G23270	AT3G14710		Os03g0114700	Os08g0479300
AT5G63920	AT3G23980		Os12g0533500	Os01g0970900
AT4G21980	AT2G17530		Os06g0139200	Os07g0572600
AT1G03120	AT4G02810		Os03g0263700	Os09g0433700
AT5G53200	AT2G12461		Os11g0471100	Os12g0509300
AT1G32930	AT2G45380		Os11g0276300	Os04g0540600
AT4G16265	AT3G48330		Os04g0531300	Os09g0326100
AT1G54370	AT3G45660		Os02g0688800	Os04g0689400
AT2G38010	AT1G67300		Os09g0322000	Os11g0150400
AT3G07690	AT1G15330		Os03g0120400	Os08g0505900
AT1G64520	AT3G56470		Os09g0440700	Os02g0556100
AT3G57440	AT2G29330		Os07g0517000	Os11g0504900
AT2G27280	AT1G02130		Os01g0663800	Os04g0228100
AT5G28490	AT1G26470		Os04g0470150	Os02g0801900
AT3G48980	AT1G32920		Os04g0649600	Os01g0262500
AT1G08960	AT1G50790		Os08g0231100	Os01g0652100
AT2G04620	AT5G16360		Os03g0797700	Os05g0521700
AT1G76440	AT3G15630		Os04g0194800	Os12g0102500
AT1G31710	AT1G77460		Os02g0749400	Os04g0689500
AT5G01010	AT4G30760		Os07g0182601	Os03g0284500
AT5G01830	AT3G20470		Os02g0533800	Os07g0202100
AT4G14965	AT4G10360		Os06g0215200	Os01g0775500
AT2G32795	AT4G33240		Os04g0119000	Os06g0308000
AT1G17160	AT3G53650		Os01g0172300	Os01g0166800
AT2G36220	AT3G09760		Os08g0411800	Os04g0631200
AT3G03470	AT5G53820		Os06g0721800	Os03g0207800
AT2G27510	AT1G17190		Os10g0534600	Os10g0522500
AT3G20510	AT4G35490		Os08g0416900	Os03g0138200
AT1G07000	AT1G76630		Os02g0209400	Os12g0638100
AT3G46510	AT2G30700		Os03g0802500	Os10g0499600
AT1G34245	AT1G45180		Os04g0252400	Os06g0644600
AT5G64160	AT2G34810		Os04g0555000	Os10g0405500
AT3G57280	AT2G06050		Os02g0796700	Os11g0123066
AT2G21050	AT5G13280		Os02g0274000	Os01g0969100
AT1G05880	AT2G33450		Os01g0144500	Os02g0797400
AT3G51730	AT3G24160		Os07g0670200	Os02g0528500
AT2G42690	AT5G24390		Os01g0247600	Os03g0712100
AT5G05680	AT1G58360		Os03g0426800	Os03g0119100
AT5G04700	AT3G51610		Os01g0923000	Os01g0132800
AT2G29060	AT5G01075		Os11g0112800	Os12g0443700
AT1G09240	AT4G35930		Os07g0670000	Os02g0721100
AT5G44040	AT5G44000		Os01g0256500	Os07g0616200
AT4G38250	AT2G31360		Os02g0740700	Os07g0295000
AT5G40650	AT5G55720		Os08g0417000	Os07g0675100
AT1G17890	AT1G11710		Os08g0559501	Os09g0497700
AT3G10130	AT2G01570		Os08g0230000	Os09g0280300
AT1G69252	AT2G17695		Os03g0857750	Os06g0642650
AT5G51010	AT2G04360		Os03g0353400	Os02g0823200
AT2G26970	AT3G25597		Os05g0491000	Os10g0336700
AT3G62450	AT1G63770		Os06g0147100	Os10g0340600
AT3G04850	AT1G19000		Os01g0973500	Os09g0463232
AT1G14900	AT3G19180		Os10g0528150	Os04g0376700
AT3G14320	AT3G27930		Os04g0515400	Os01g0222500
AT1G62500	AT5G46090		Os02g0571900	Os02g0778500
AT1G05300	AT1G10040		Os05g0526300	Os07g0564000
AT1G28110	ATMG00285		Os05g0144100	Os01g0300600
AT5G02290	AT4G30850		Os09g0129500	Os09g0559500
AT5G48560	AT5G52640		Os07g0463400	Os08g0557800
AT1G01440	AT3G20960		Os01g0699400	Os02g0234450
AT1G20350	AT1G29030		Os04g0432500	Os07g0558000
AT5G41410	AT2G45030		Os02g0614732	Os09g0491100
AT3G49160	AT4G38000		Os06g0700300	Os02g0138200
AT3G30340	AT1G51150		Os07g0574200	Os01g0516200
AT3G28450	AT1G65080		Os08g0117900	Os01g0875700
AT3G52310	AT4G38080		Os01g0711200	Os09g0453300
AT1G73260	AT4G18590		Os10g0570001	Os02g0606900
AT5G61300	AT4G38800		Os03g0690500	Os09g0556800
AT3G22370	AT1G28040		Os10g0530400	Os03g0101900
AT5G46150	AT1G68840		Os05g0498400	Os02g0814300
AT5G60870	AT1G69250		Os02g0264700	Os06g0320200
AT4G38430	AT5G18910		Os01g0112400	Os01g0835000
AT1G14260	AT3G14420		Os04g0644800	Os03g0644600
AT2G28240	AT4G33890		Os02g0693200	Os01g0830000
AT1G73177	AT2G38670		Os06g0306600	Os08g0561800
AT3G48490	AT5G15340		Os01g0559300	Os03g0370500
AT4G16855	AT5G16070		Os11g0655100	Os02g0829100
AT5G01510	AT2G41150		Os09g0434200	Os04g0393900
AT3G19920	AT5G05550		Os06g0332400	Os04g0678300
AT3G04480	AT1G09620		Os07g0540500	Os05g0462200
AT4G20220	AT4G10140		Os06g0474866	Os09g0465600
AT2G16450	AT5G48630		Os03g0152400	Os02g0506100
AT2G23950	AT5G50570		Os08g0548200	Os10g0524000
AT5G06740	AT3G60690		Os06g0140900	Os01g0212000
AT1G29740	AT2G36850		Os02g0601100	Os08g0478800
AT5G40280	AT5G02610		Os04g0482000	Os07g0120900
AT2G32300	AT4G32330		Os05g0596500	Os08g0446301
AT2G34585	AT2G27950		Os06g0568600	Os07g0565100
AT2G36790	AT3G48440		Os10g0522900	Os12g0621700
AT5G41750	AT1G79550		Os12g0612100	Os06g0718100
AT2G39840	AT1G22270		Os01g0296100	Os03g0328000
AT1G63640	AT2G41070		Os09g0299200	Os03g0190100
AT2G41240	AT3G20940		Os11g0665950	Os02g0827600
AT4G13554	AT1G72800		Os02g0468400	Os03g0746800
AT5G40382	AT5G53560		Os05g0205000	Os05g0222200
AT5G46910	AT3G14290		Os12g0407350	Os05g0510800
AT4G02620	AT2G34850		Os02g0306401	Os07g0512000
AT3G05700	AT5G12440		Os02g0462500	Os08g0115800
AT3G26922	AT3G53360		Os03g0803000	Os03g0118100
AT5G44785	AT4G28080		Os10g0535900	Os09g0442700
AT5G42280	AT1G68820		Os02g0221900	Os01g0931200
AT4G10150	AT1G78630		Os02g0260700	Os02g0433900
AT1G02690	AT5G38310		Os04g0610000	Os02g0700700
AT4G14150	AT3G14990		Os01g0913800	Os11g0244900
AT3G28340	AT4G26900		Os05g0339200	Os02g0302900
AT1G03330	AT3G44300		Os09g0255000	Os09g0521100
AT1G08080	AT5G21030		Os02g0697700	Os09g0454300
AT4G13505	AT3G25610		Os01g0644000	Os06g0143900
AT2G28490	AT3G26934		Os12g0512400	Os06g0244700
AT4G20110	AT4G16680		Os03g0222100	Os08g0414000
AT2G40300	AT1G67265		Os12g0560900	Os01g0886900
AT2G16510	AT3G09570		Os11g0649500	Os08g0160300
AT1G10360	AT4G21440		Os03g0599000	Os12g0601800
AT3G27390	AT5G66730		Os02g0182850	Os07g0645500
AT3G15340	AT5G05990		Os06g0323100	Os02g0817500
AT2G47060	AT1G21310		Os03g0206900	Os12g0421000
AT3G59450	AT2G33280		Os07g0670300	Os03g0781000
AT2G22920	AT4G30400		Os11g0671000	Os01g0757400
AT4G07960	AT5G52450		Os12g0630750	Os12g0619000
AT1G17290	AT5G08565		Os09g0442900	Os01g0765500
AT5G13800	AT2G28190		Os11g0619500	Os05g0582100
AT5G19340	AT1G14040		Os02g0808500	Os04g0166600
AT3G13662	AT3G12130		Os06g0525200	Os12g0121600
AT2G38465	AT2G27385		Os12g0549700	Os10g0502600
AT2G18570	AT3G44440		Os10g0569500	Os02g0738900
AT1G46768	AT3G52200		Os09g0563700	Os03g0707600
AT2G26310	AT5G04885		Os05g0113500	Os09g0538700
AT2G31650	AT4G34050		Os06g0109000	Os01g0967200
AT1G03100	AT5G04660		Os11g0112000	Os01g0226250
AT4G32630	AT5G47820		Os12g0446700	Os12g0479900
AT5G58670	AT3G48430		Os08g0112300	Os08g0162200
AT1G66540	AT3G07970		Os02g0687600	Os12g0104400
AT1G19740	AT4G33280		Os03g0334200	Os09g0494200
AT1G13470	AT4G25090		Os02g0671100	Os02g0125100
AT5G05040	AT4G37800		Os03g0626100	Os06g0152550
AT3G47940	AT5G59460		Os12g0575300	Os04g0553500
AT5G04000	AT4G01270		Os01g0310550	Os12g0133050
AT3G27120	AT3G22700		Os12g0410200	Os02g0172800
AT3G53520	AT1G23210		Os01g0589200	Os05g0362100
AT1G66140	AT4G13770		Os01g0866300	Os01g0957100
AT1G47340	AT3G02310		Os10g0482700	Os06g0729300
AT3G23490	AT5G17150		Os02g0610600	Os02g0178500
AT2G17730	AT1G10490		Os03g0274800	Os01g0280200
AT5G66170	AT1G72630		Os05g0446800	Os02g0666900
AT5G37478	AT3G20395		Os05g0316200	Os09g0416900
AT5G25940	AT2G20690		Os02g0636700	Os07g0546400
AT5G46740	AT1G74950		Os02g0147700	Os04g0524300
AT4G22130	AT1G36180		Os08g0113300	Os03g0798500
AT1G26680	AT1G09010		Os05g0411600	Os05g0168800
AT1G07640	AT5G66950		Os09g0408900	Os01g0934350
AT3G57480	AT3G24730		Os03g0748000	Os09g0375000
AT1G69050	AT2G34500		Os04g0544000	Os03g0251425
AT2G30330	AT1G78420		Os01g0817633	Os11g0115100
AT1G47128	AT3G14230		Os09g0504700	Os11g0181400
AT2G24420	AT3G28550		Os03g0218100	Os08g0112400
AT1G22650	AT5G67220		Os09g0392666	Os01g0814150
AT1G34160	AT5G57530		Os05g0335800	Os10g0498900
AT1G08910	AT5G10695		Os04g0659400	Os03g0676100
AT3G17730	AT1G72980		Os01g0795700	Os03g0296700
AT3G61510	AT2G18180		Os01g0869600	Os01g0589400
AT2G34655	AT4G00893		Os01g0337160	Os08g0427700
AT3G45260	AT1G65310		Os02g0740600	Os10g0554900
AT1G74380	AT3G21070		Os09g0365100	Os07g0108900
AT2G44460	AT5G27910		Os05g0551000	Os03g0102333
AT3G17380	AT1G09870		Os11g0153100	Os03g0775700
AT4G23220	AT4G38580		Os03g0128400	Os01g0715400
ATMG01350	AT2G23360		Os07g0123900	Os05g0413400
AT1G79420	AT2G25625		Os01g0667900	Os05g0338933
AT5G55680	AT4G31550		Os04g0532500	Os01g0785900
ATMG00640	AT2G39180		Os06g0213200	Os07g0689600
AT2G44830	AT1G76240		Os05g0514600	Os06g0338200
AT5G48380	AT5G24270		Os01g0855600	Os04g0644600
AT5G47120	AT1G10385		Os06g0202700	Os08g0466950
AT2G43870	AT1G08220		Os04g0151900	Os12g0530000
AT1G03470	AT1G65845		Os02g0173200	Os01g0636500
AT2G29180	AT3G61630		Os01g0584900	Os01g0939700
AT5G41810	ATMG00100		Os04g0587400	Os04g0534400
AT4G28710	AT4G12690		Os09g0319701	Os02g0739600
AT1G20200	AT2G34060		Os03g0142900	Os09g0286300
AT1G07210	AT1G12244		Os11g0258400	Os12g0632900
AT1G68945	AT2G38480		Os03g0187600	Os05g0154500
AT5G35600	AT1G25390		Os03g0203200	Os03g0434800
AT5G14680	AT1G78810		Os02g0750600	Os03g0159600
AT2G46300	AT4G30790		Os07g0548900	Os11g0124900
AT3G59650	AT5G40040		Os02g0593900	Os02g0247200
AT3G16320	AT1G78520		Os03g0857000	Os02g0809900
AT4G29950	AT4G28480		Os05g0169000	Os02g0781400
AT1G21690	AT3G10250		Os11g0588300	Os02g0710700
AT2G45900	AT3G46460		Os04g0428500	Os01g0832300
AT1G50430	AT5G16940		Os01g0850100	Os01g0801600
AT3G48380	AT5G07650		Os01g0802200	Os08g0393700
AT4G22233	AT2G45880		Os03g0807000	Os04g0422700
AT4G25100	AT2G42400		Os02g0488600	Os06g0196900
AT3G62660	AT4G39870		Os11g0481500	Os05g0386800
AT1G29380	AT3G11150		Os11g0209550	Os01g0946100
AT3G20840	AT5G02940		Os01g0214300	Os05g0380850
AT2G27590	AT2G38970		Os05g0529700	Os09g0552300
AT2G36570	AT3G44110		Os07g0147550	Os03g0110500
AT1G06540	AT2G01300		Os03g0756400	Os03g0120000
AT1G68290	AT5G38520		Os02g0465900	Os08g0327400
AT3G10160	AT3G04340		Os03g0318600	Os12g0590550
AT1G58290	AT5G39160		Os04g0379400	Os01g0670800
AT2G19380	AT4G38910		Os10g0566400	Os02g0792600
AT1G49890	AT2G03640		Os02g0228151	Os11g0610700
AT4G18930	AT2G25930		Os11g0549650	Os06g0160100
AT2G39890	AT5G52630		Os05g0517800	Os08g0243600
AT2G22890	AT1G05900		Os09g0345700	Os05g0159500
AT1G53680	AT5G58940		Os04g0674000	Os05g0579900
AT1G16070	AT4G10160		Os07g0130100	Os12g0578000
AT5G12870	AT1G02740		Os08g0386800	Os05g0577900
AT5G22700	AT1G69850		Os04g0182800	Os11g0283500
AT1G14730	AT3G52740		Os07g0204100	Os05g0319700
AT2G38840	AT1G63670		Os02g0658100	Os07g0676700
AT3G03720	AT1G06530		Os01g0771300	Os08g0554300
AT5G43470	AT1G71710		Os03g0324900	Os11g0153600
AT4G22230	AT3G55420		Os11g0701100	Os01g0761300
AT5G27020	AT4G12570		Os05g0429100	Os03g0692000
AT5G67110	AT4G10050		Os12g0580600	Os02g0699466
AT4G25790	AT2G16270		Os03g0146600	Os03g0256800
AT3G59250	AT5G45275		Os02g0638000	Os03g0856100
AT1G13680	AT2G27229		Os04g0549300	Os01g0127400
AT1G32160	AT5G10770		Os04g0191800	Os10g0347800
AT2G02710	AT5G11730		Os10g0535800	Os01g0972800
AT3G61210	AT2G02850		Os03g0189600	Os06g0284200
AT2G03445	AT3G58790		Os06g0168800	Os11g0484700
AT1G75620	AT3G17152		Os11g0483600	Os08g0558400
AT5G37890	AT2G40880		Os11g0223400	Os10g0497600
AT1G34047	AT5G06265		Os04g0470100	Os12g0468300
AT3G42150	AT3G46100		Os08g0348300	Os04g0639100
AT4G16970	AT2G19870		Os02g0817800	Os04g0576900
AT3G14870	AT1G01930		Os05g0567500	Os06g0269151
AT5G02440	ATCG00400		Os02g0205100	Os01g0739200
AT1G69340	AT1G57980		Os08g0536341	Os03g0703100
AT5G20280	AT1G55210		Os02g0147100	Os03g0758700
AT2G05180	AT5G14480		Os06g0591400	Os05g0102600
AT1G60960	AT3G21340		Os01g0833400	Os11g0654800
AT4G35970	AT2G40760		Os01g0176200	Os07g0501800
AT1G31770	AT3G29791		Os04g0107500	Os07g0474300
AT2G16780	AT4G02560		Os07g0186400	Os08g0240800
AT2G34710	AT2G41680		Os01g0925600	Os02g0164900
AT1G73880	AT3G14860		Os01g0739300	Os03g0715332
AT5G12200	AT4G28270		Os02g0227200	Os10g0504600
AT1G67020	AT5G17850		Os06g0204600	Os08g0519900
AT2G41230	AT3G42180		Os05g0526700	Os10g0545600
AT1G69730	AT2G46240		Os05g0269100	Os10g0462800
AT1G12013	AT3G60500		Os01g0120500	Os02g0187100
AT1G21270	AT1G71350		Os05g0417300	Os03g0713600
AT4G15500	AT1G28600		Os06g0193000	Os08g0119700
AT1G13790	ATCG00010		Os10g0534500	Os03g0697466
AT4G11260	AT1G35625		Os05g0498700	Os10g0394100
AT2G15320	AT1G14688		Os08g0292600	Os08g0511800
AT4G32930	AT3G10580		Os06g0111100	Os02g0135300
AT2G15042	AT3G62820		Os02g0134300	Os12g0601000
AT5G24500	AT1G49840		Os08g0116400	Os09g0569200
AT3G13850	AT2G29340		Os11g0150632	Os01g0580200
AT5G23440	AT1G01220		Os05g0137000	Os09g0535100
AT4G24250	AT4G37830		Os06g0641066	Os03g0692100
AT2G29130	AT5G57340		Os03g0244950	Os03g0373300
AT5G44070	AT5G23395		Os08g0113600	Os06g0634500
AT5G10550	AT1G01470		Os06g0149500	Os02g0699433
AT1G47740	AT2G18280		Os01g0118700	Os11g0246900
AT5G59300	AT2G38420		Os06g0133500	Os01g0175600
AT2G32860	AT5G46820		Os01g0580800	Os07g0607500
AT5G02390	AT5G15930		Os07g0583000	Os01g0369000
AT4G29100	AT5G43150		Os05g0468700	Os02g0595800
AT2G30362	AT5G58440		Os08g0191600	Os01g0362100
AT5G08660	AT5G28520		Os04g0286300	Os02g0193600
AT1G65120	AT2G15080		Os02g0166501	Os02g0533000
AT2G45410	AT2G17580		Os11g0236932	Os08g0512600
AT1G71240	AT2G13100		Os11g0592900	Os05g0150550
AT3G09000	AT4G18610		Os06g0624900	Os08g0404200
AT5G59400	AT1G62380		Os06g0196500	Os01g0780400
AT4G03505	AT5G04190		Os02g0150600	Os01g0889000
ATMG00850	AT4G37660		Os05g0344200	Os01g0362800
AT5G40030	AT1G49032		Os01g0297200	Os11g0244300
AT1G59870	AT4G30810		Os07g0550500	Os04g0568300
AT5G19680	AT3G02110		Os03g0784500	Os04g0302400
AT2G24762	AT1G66783		Os11g0154500	Os04g0127300
AT1G51960	AT4G19110		Os08g0195800	Os05g0163050
AT3G49120	AT1G14550		Os08g0293100	Os02g0658800
AT5G28450	AT1G72500		Os03g0718600	Os03g0803300
AT5G13730	AT3G45420		Os01g0386700	Os01g0750300
AT5G09830	AT3G59990		Os03g0826900	Os11g0592800
AT1G07128	AT5G63660		Os08g0562866	Os04g0406300
AT3G05400	AT1G31420		Os09g0362500	Os06g0659800
AT5G14950	AT1G55510		Os06g0591200	Os02g0110400
AT1G75380	AT1G23550		Os02g0191500	Os02g0640000
AT1G43890	AT2G31110		Os01g0775100	Os03g0212600
AT3G02030	AT2G42600		Os06g0654400	Os05g0392900
AT5G09790	AT5G20130		Os07g0669650	Os08g0163400
AT4G38590	AT4G12760		Os07g0541900	Os08g0546100
AT5G53450	AT1G54970		Os03g0192600	Os01g0903100
AT2G26390	AT5G43745		Os01g0679600	Os01g0300200
AT1G69200	AT5G48090		Os06g0184800	Os03g0758600
AT5G63910	AT2G35370		Os12g0257500	Os09g0396900
AT2G05710	AT5G44220		Os09g0551201	Os09g0382000
AT1G04540	AT3G01550		Os10g0536500	Os02g0176300
AT1G30910	AT2G23540		Os02g0690200	Os01g0605300
AT1G26540	AT5G25110		Os05g0463900	Os06g0645500
AT2G38450	AT4G22000		Os03g0590700	Os06g0704450
AT4G22310	AT5G59320		Os02g0161900	Os03g0812500
AT2G32540	AT1G09760		Os07g0161000	Os07g0100300
AT1G54460	AT2G30730		Os06g0164800	Os02g0226600
AT1G29965	AT5G01450		Os08g0392100	Os12g0176300
AT3G11773	AT1G27120		Os02g0734300	Os04g0548450
AT2G27330	AT1G22890		Os11g0229333	Os09g0242000
AT2G30770	AT5G56990		Os03g0790900	Os11g0538900
AT4G16370	AT5G41020		Os06g0264500	Os10g0494300
AT1G31950	AT1G53640		Os02g0521100	Os02g0244600
AT5G19473	AT2G35382		Os06g0349800	Os04g0569400
AT3G56891	AT1G09920		Os06g0253350	Os02g0513800
AT2G25100	AT1G64460		Os12g0116600	Os01g0629900
AT4G29735	AT2G38310		Os06g0225000	Os01g0277500
AT5G13290	AT4G01040		Os09g0507200	Os07g0434500
AT3G49810	AT4G31875		Os02g0581900	Os11g0116500
AT1G78400	AT3G58270		Os12g0174800	Os02g0769200
AT3G09510	AT5G53050		Os05g0114800	Os02g0171100
AT3G63280	AT1G53500		Os01g0743800	Os01g0694900
AT1G02190	AT4G28140		Os06g0556000	Os10g0568300
AT2G36540	AT4G04880		Os04g0496000	Os01g0666950
AT3G48990	AT3G49240		Os03g0809800	Os01g0198100
AT1G03380	AT3G25882		Os12g0485800	Os10g0498500
AT5G02170	AT1G30070		Os03g0767500	Os11g0147500
AT1G02710	AT5G36890		Os01g0837600	Os02g0661300
AT1G07450	AT1G75100		Os12g0485300	Os02g0492600
ATMG00470	AT3G01650		Os05g0524100	Os01g0897300
AT5G51270	AT5G63130		Os05g0138000	Os01g0184500
AT5G53550	AT2G25737		Os01g0369700	Os06g0163400
AT3G63300	AT4G27380		Os03g0235100	Os02g0744200
AT2G35680	AT4G35040		Os07g0442900	Os01g0166100
AT1G67480	AT5G49910		Os06g0714000	Os12g0411700
AT3G21290	AT2G45890		Os12g0483700	Os03g0228800
AT5G61320	AT5G55490		Os03g0167500	Os07g0630900
AT5G42530	AT2G41190		Os03g0764800	Os03g0284000
AT5G63890	AT1G44830		Os05g0427100	Os02g0258250
AT4G22900	AT5G27430		Os12g0596300	Os08g0192200
AT4G39820	AT1G47056		Os07g0458500	Os09g0277800
AT5G39520	AT1G18030		Os05g0545300	Os08g0459100
AT2G30766	AT5G53300		Os07g0619400	Os05g0501200
AT3G20570	AT1G01355		Os11g0492200	Os01g0846600
AT5G59660	AT2G20560		Os03g0231600	Os08g0445000
AT1G55790	AT5G54980		Os01g0393400	Os02g0741800
AT1G33320	AT5G56630		Os07g0580700	Os06g0137400
AT1G35220	AT2G32380		Os02g0832600	Os03g0130100
AT1G21010	AT5G25150		Os04g0568900	Os04g0597866
AT4G24060	AT4G17050		Os04g0617050	Os01g0957900
AT5G57160	AT5G35926		Os11g0694100	Os10g0571300
AT3G06120	AT3G27090		Os07g0191650	Os04g0465600
AT1G74020	AT3G04030		Os07g0608900	Os11g0146600
AT1G13960	AT3G13950		Os05g0594100	Os10g0532200
AT1G04770	AT4G01430		Os05g0574700	Os04g0656800
AT4G20880	AT1G55150		Os08g0396200	Os07g0168000
AT3G23810	AT3G24590		Os03g0722200	Os05g0152400
AT4G28770	AT5G04290		Os05g0546500	Os03g0780350
AT1G53920	AT1G79520		Os03g0681300	Os07g0620800
AT2G28580	AT3G27080		Os03g0162300	Os05g0156600
AT4G22790	AT5G15900		Os01g0214800	Os06g0660400
AT2G32487	AT5G27990		Os03g0326000	Os12g0529800
AT5G57710	AT5G48930		Os07g0512200	Os03g0671800
AT5G43935	AT3G52490		Os03g0174800	Os01g0133200
AT2G14247	AT4G09830		Os05g0196800	Os07g0658300
AT2G46685	AT3G03070		Os06g0131300	Os01g0256800
AT4G35520	AT1G35470		Os05g0362000	Os06g0224650
AT5G23908	AT3G49140		Os05g0145000	Os06g0187050
AT1G67170	AT2G43410		Os09g0272500	Os07g0192800
AT2G44160	AT2G14830		Os06g0534800	Os07g0507200
AT1G32790	AT5G57070		Os02g0129700	Os05g0589200
AT1G59910	AT4G27652		Os04g0634800	Os12g0580950
AT3G05050	AT5G35930		Os07g0153300	Os02g0256100
AT1G74040	AT3G10600		Os01g0167750	Os03g0209600
AT1G65720	AT1G73530		Os08g0510500	Os07g0676600
AT1G20620	AT5G56795		Os03g0812400	Os11g0637700
AT5G23330	AT2G36530		Os01g0232400	Os03g0265400
AT4G23610	AT2G46710		Os02g0583900	Os07g0556300
AT2G47500	AT4G39800		Os10g0516900	Os11g0180600
AT3G05600	AT4G10070		Os04g0415000	Os03g0152900
AT3G12480	AT4G03490		Os05g0142400	Os03g0335500
AT2G25060	AT5G48540		Os05g0321600	Os11g0522000
AT5G64855	AT4G24180		Os02g0277700	Os04g0529100
AT1G11270	AT1G80930		Os11g0237300	Os01g0897700
AT1G71360	AT3G52250		Os02g0610500	Os03g0248250
AT5G05960	AT1G67570		Os03g0852000	Os03g0758500
AT4G38530	AT1G61030		Os03g0345700	Os06g0564100
AT5G59340	AT1G34630		Os03g0757400	Os03g0579200
AT3G26550	AT3G16680		Os07g0113600	Os04g0496300
AT5G42760	AT3G13680		Os04g0539500	Os07g0560700
AT1G16240	AT5G28080		Os03g0843100	Os02g0666700
AT5G62540	AT5G13980		Os11g0141000	Os06g0115700
AT1G52150	AT1G64670		Os02g0661800	Os09g0297400
AT3G18060	AT3G49360		Os05g0409300	Os07g0168700
AT5G60600	AT5G22050		Os10g0559866	Os10g0522601
AT3G46000	AT3G13070		Os10g0341800	Os06g0604400
AT5G14380	AT5G65760		Os06g0651000	Os03g0330300
AT5G25920	AT5G23770		Os05g0106900	Os09g0110100
AT1G60860	AT4G39950		Os04g0555300	Os04g0272200
AT1G23440	AT5G47230		Os10g0569400	Os03g0411900
AT3G18290	AT4G12405		Os02g0834050	Os03g0650400
AT1G72070	AT3G49880		Os02g0193900	Os01g0896700
AT5G50930	AT4G13870		Os05g0237100	Os03g0821350
AT1G26230	AT1G75430		Os08g0404500	Os05g0547600
AT1G02670	AT1G12920		Os11g0263000	Os12g0541500
AT3G59830	AT4G14240		Os01g0766300	Os06g0247900
AT4G15160	AT1G66590		Os01g0711400	Os02g0655800
AT3G18960	AT3G27850		Os01g0780500	Os05g0493400
AT1G77710	AT1G06500		Os07g0208801	Os02g0166200
AT2G44910	AT5G09980		Os03g0663900	Os03g0576700
AT3G47070	AT3G24890		Os01g0884200	Os04g0636600
AT3G22400	AT3G24510		Os02g0580400	Os02g0719266
AT4G39560	AT4G25710		Os03g0323600	Os10g0477100
AT2G42730	AT3G13310		Os03g0575500	Os02g0189300
AT5G16850	AT4G14760		Os08g0176633	Os01g0687800
AT3G16360	AT5G50360		Os01g0727500	Os12g0581700
AT2G18260	AT1G69810		Os04g0186400	Os01g0811400
AT3G52170	AT5G08280		Os03g0305100	Os03g0783100
AT4G00860	AT2G37320		Os01g0757051	Os08g0434201
AT1G52120	AT5G62865		Os06g0204700	Os04g0642100
AT3G10680	AT2G01430		Os03g0858200	Os02g0703900
AT1G43260	AT1G62790		Os04g0206450	Os04g0270100
AT1G02810	AT3G52390		Os05g0489600	Os02g0450000
AT2G31160	AT5G45420		Os03g0727100	Os08g0152800
AT1G31335	AT4G27750		Os06g0179000	Os06g0654300
AT3G04750	AT4G02000		Os06g0151850	Os03g0156500
AT1G12070	AT4G27060		Os03g0642900	Os08g0230350
AT5G09220	AT4G16600		Os07g0120650	Os02g0557500
AT3G60190	AT5G10650		Os02g0254600	Os06g0257450
AT5G19970	AT4G14480		Os12g0635500	Os01g0742500
AT1G16910	AT1G30320		Os09g0553300	Os12g0623400
AT3G63360	AT5G42690		Os04g0509600	Os04g0619200
AT2G41130	AT1G60850		Os02g0292600	Os02g0554100
AT5G07770	AT5G23080		Os10g0524300	Os03g0785800
AT2G25420	AT3G59770		Os04g0678000	Os12g0555600
AT2G18540	AT3G60110		Os02g0126200	Os04g0678700
AT1G47370	AT3G50010		Os06g0535400	Os06g0192001
AT3G19100	AT5G57810		Os10g0516300	Os02g0261000
AT1G71695	AT3G17130		Os04g0628100	Os04g0433600
AT1G70330	AT1G25422		Os10g0425400	Os03g0691500
AT4G36050	AT1G02720		Os01g0673300	Os01g0851300
AT5G16530	AT5G61140		Os03g0836500	Os07g0174200
AT4G22940	AT3G19930		Os06g0661600	Os03g0775200
AT1G17430	AT3G59940		Os02g0550000	Os08g0460000
AT4G35783	AT3G52820		Os05g0573550	Os08g0442700
AT5G01370	AT4G01290		Os12g0149800	Os05g0372200
AT5G09820	AT5G24360		Os03g0828701	Os07g0592000
AT1G55940	AT5G62570		Os03g0340500	Os08g0130400
AT1G01590	AT3G27830		Os06g0643300	Os09g0132900
AT5G37070	AT2G23350		Os04g0630900	Os05g0376800
AT1G04030	AT2G17030		Os09g0467200	Os03g0602600
AT1G14190	AT2G30105		Os12g0231600	Os08g0179400
AT5G54280	AT4G04960		Os06g0166900	Os02g0526000
AT5G48810	AT3G15080		Os04g0384650	Os10g0472400
AT5G25490	AT5G29000		Os05g0361200	Os03g0787200
AT2G35658	AT2G39800		Os04g0596200	Os03g0308100
AT2G06510	AT5G12920		Os02g0191300	Os01g0813300
AT5G50350	AT1G66180		Os03g0681400	Os09g0482000
AT1G07230	AT3G52780		Os10g0458700	Os02g0130600
AT4G29080	AT5G35410		Os01g0349000	Os12g0263100
AT5G17880	AT1G56010		Os04g0101300	Os02g0621300
AT1G71090	AT1G75170		Os05g0431700	Os05g0450600
AT1G76270	AT4G12900		Os09g0101100	Os10g0420200
AT3G54120	AT2G45245		Os01g0693400	Os01g0744000
AT4G00030	AT1G08035		Os08g0275200	Os09g0359900
AT5G11620	AT1G03190		Os05g0417700	Os09g0517600
AT5G14540	AT3G62860		Os09g0423700	Os09g0492800
AT1G64440	AT1G14200		Os07g0684800	Os10g0111350
AT3G53180	AT2G40330		Os02g0760400	Os03g0705433
AT3G07195	AT3G56080		Os03g0175800	Os04g0550800
AT5G16020	AT4G04750		Os02g0807000	Os05g0524800
AT5G22690	AT4G14680		Os01g0845100	Os08g0194000
AT4G21540	AT3G27740		Os10g0561900	Os09g0462550
AT1G16220	AT1G03870		Os10g0113000	Os09g0538500
AT1G17420	AT1G50780		Os02g0585100	Os03g0209800
AT2G24490	AT1G26590		Os01g0558700	Os02g0266300
AT5G22510	AT5G18860		Os04g0631600	Os07g0204900
AT3G62210	AT4G11660		Os01g0295700	Os03g0736300
AT2G05270	AT5G22220		Os01g0136400	Os02g0184100
AT5G51860	AT1G67700		Os11g0557000	Os08g0285600
AT4G08250	AT2G21950		Os03g0607700	Os11g0169800
AT3G55210	AT1G18450		Os03g0187200	Os04g0438300
AT3G60270	AT3G05760		Os04g0390800	Os06g0659300
AT3G16600	ATCG01060		Os02g0121700	Os10g0512700
AT4G20160	AT3G19130		Os04g0671100	Os05g0587000
AT5G67600	AT5G52400		Os03g0701600	Os01g0739000
AT1G55820	AT3G05020		Os10g0470100	Os06g0490200
AT1G63550	AT1G55660		Os08g0506850	Os02g0439200
AT4G25190	AT3G28910		Os02g0756032	Os06g0235100
AT4G12382	AT1G44910		Os05g0381700	Os02g0760200
AT5G03660	AT3G06019		Os12g0565000	Os05g0394200
AT1G04560	AT4G22050		Os12g0138050	Os04g0687300
AT2G16740	AT2G35520		Os04g0584100	Os01g0591000
AT3G01530	AT3G50630		Os06g0652200	Os12g0121300
AT3G53790	AT3G46540		Os11g0582000	Os01g0269500
AT2G47220	AT1G13920		Os01g0876500	Os03g0651100
AT5G05020	AT1G75730		Os06g0220800	Os04g0169666
AT1G77530	AT1G42480		Os01g0795900	Os09g0414500
AT5G07150	AT5G39360		Os03g0277500	Os09g0395600
AT5G13650	AT1G28670		Os01g0793900	Os06g0126500
AT5G17580	AT5G20900		Os04g0435475	Os12g0553050
AT1G49940	AT1G67860		Os04g0295000	Os08g0551225
AT2G41370	AT3G10845		Os02g0821900	Os06g0212600
AT1G18050	AT3G50410		Os11g0655900	Os11g0233400
AT2G01490	AT5G24206		Os05g0112125	Os03g0297850
AT3G56960	AT5G15430		Os04g0617200	Os06g0691400
AT3G56390	AT3G11340		Os01g0131300	Os08g0321000
AT4G34270	AT4G04850		Os10g0151800	Os02g0258200
AT1G45015	AT5G42040		Os04g0661600	Os02g0636600
AT4G03080	AT3G17390		Os11g0634350	Os07g0548300
AT1G65200	AT3G42630		Os03g0741600	Os03g0183600
AT5G59260	AT5G15450		Os04g0583200	Os12g0143400
AT5G56890	AT2G40475		Os07g0277200	Os10g0200800
AT5G64040	AT1G79890		Os03g0190400	Os07g0576550
AT4G30972	AT3G56130		Os03g0594400	Os08g0101100
AT4G38092	AT2G17940		Os06g0715600	Os10g0431700
AT4G21640	AT3G50280		Os01g0832200	Os03g0259400
AT1G53660	AT3G55230		Os10g0342300	Os06g0728800
AT1G13609	AT2G43900		Os03g0322200	Os03g0794000
AT1G08115	AT1G14560		Os09g0514400	Os05g0403400
AT3G07420	AT5G14920		Os03g0305800	Os09g0448500
AT4G32040	AT1G10060		Os10g0478500	Os05g0113900
AT1G06200	AT2G37360		Os02g0248200	Os02g0732400
AT1G12950	AT1G60970		Os08g0127700	Os03g0849600
AT3G16350	AT5G55940		Os08g0558700	Os11g0211600
AT1G18410	AT1G48840		Os05g0455600	Os03g0852700
AT1G05690	AT5G58090		Os04g0562000	Os03g0302900
AT1G80230	AT2G21280		Os08g0430300	Os11g0657100
AT1G65110	AT4G17330		Os01g0660900	Os03g0782500
AT1G13560	AT4G19350		Os06g0153900	Os01g0846450
AT1G78000	AT4G23550		Os03g0198400	Os03g0747900
AT4G11840	AT2G25870		Os01g0971700	Os02g0177300
AT5G52580	AT5G17790		Os01g0566200	Os10g0512500
AT1G55440	AT4G23190		Os09g0454900	Os06g0137100
AT3G45160	AT3G17180		Os05g0169500	Os01g0852400
AT3G56870	AT1G77280		Os02g0720300	Os08g0540100
AT5G53930	AT2G26150		Os09g0526600	Os03g0582300
AT3G21420	AT3G54350		Os02g0775100	Os03g0747100
AT1G52450	AT2G23340		Os06g0294950	Os03g0119900
AT5G13520	AT2G12200		Os10g0340301	Os11g0569733
AT5G05580	AT3G46630		Os11g0592375	Os06g0577350
AT1G66730	AT3G18880		Os05g0529200	Os02g0196300
AT1G21970	ATCG00170		Os05g0252100	Os04g0667900
AT4G23120	AT5G56950		Os01g0813400	Os11g0267400
AT1G70550	AT1G18060		Os08g0114000	Os01g0672100
AT1G28530	AT5G41650		Os10g0550200	Os07g0517300
AT1G52440	AT1G11850		Os04g0531800	Os02g0110600
AT1G05640	AT4G17750		Os03g0817200	Os03g0633500
AT1G09415	AT2G14800		Os10g0493800	Os04g0583600
AT5G14970	AT2G36630		Os07g0150500	Os05g0205400
AT4G29140	AT5G55740		Os01g0114100	Os12g0511200
AT1G12260	AT1G08640		Os03g0826800	Os04g0382400
AT3G17770	AT2G40970		Os10g0389200	Os04g0111225
AT5G67290	AT4G14510		Os07g0116900	Os03g0651950
AT3G54160	AT2G19570		Os12g0182600	Os01g0318700
AT3G44800	AT3G02890		Os12g0416500	Os09g0481100
AT1G68280	AT2G29850		Os02g0519700	Os04g0560500
AT3G03220	AT3G61720		Os07g0540000	Os04g0467901
AT2G26260	AT3G11440		Os11g0147000	Os06g0180000
AT3G02060	AT1G33520		Os06g0273700	Os04g0658000
AT3G19190	AT3G61035		Os01g0228300	Os05g0170600
AT4G25120	AT1G32440		Os04g0496950	Os03g0762900
AT2G02770	AT1G01340		Os12g0604000	Os02g0747500
AT3G21600	AT2G35620		Os01g0106750	Os01g0838350
AT4G38550	AT5G35480		Os12g0616500	Os07g0240600
AT5G64950	AT1G71420		Os01g0687700	Os05g0296530
ATCG00440	AT1G02370		Os11g0660700	Os07g0208500
AT5G04260	AT5G52740		Os09g0415400	Os04g0448900
AT4G23180	AT2G33835		Os03g0746900	Os07g0106700
AT3G12220	AT2G20500		Os12g0425800	Os04g0221800
AT1G21200	AT2G34315		Os05g0368400	Os04g0663100
AT2G30220	AT4G34760		Os06g0325602	Os02g0810900
AT4G28485	AT1G25350		Os12g0540200	Os11g0130300
AT2G38070	AT3G14080		Os06g0356800	Os01g0705100
AT3G45540	AT1G31970		Os12g0465600	Os10g0375400
AT5G01050	AT1G26460		Os03g0390200	Os06g0122200
AT4G35000	ATMG01360		Os05g0508700	Os12g0120000
AT1G79570	AT3G29095		Os08g0519000	Os01g0234300
AT2G01735	AT3G62180		Os03g0231900	Os12g0604300
AT5G56460	AT5G64120		Os04g0390000	Os12g0569700
AT1G31330	AT5G65240		Os11g0459400	Os05g0176100
AT1G30990	AT5G52920		Os05g0233000	Os07g0195300
AT2G11005	AT3G11405		Os05g0195101	Os05g0498300
AT1G68870	AT5G22500		Os01g0647800	Os03g0206300
AT3G04510	AT2G17300		Os03g0237900	Os07g0100600
AT1G16670	AT3G46790		Os08g0217050	Os03g0297800
AT5G05250	AT5G24300		Os03g0342900	Os01g0753500
AT5G62960	AT1G55930		Os04g0543500	Os02g0714200
AT5G49500	AT4G26990		Os06g0724900	Os02g0751100
AT5G35960	AT5G56100		Os05g0355800	Os05g0151400
AT1G69980	AT4G29760		Os01g0665900	Os02g0473000
AT3G52430	AT1G50840		Os06g0660800	Os10g0418000
AT4G33410	AT3G54920		Os02g0301000	Os10g0402200
AT3G58193	AT3G28080		Os06g0215100	Os06g0173000
AT3G11950	AT3G12560		Os03g0698500	Os07g0568000
AT1G76965	AT2G36410		Os06g0623600	Os01g0875300
AT1G56270	AT3G20015		Os04g0534300	Os05g0228400
AT5G50150	AT5G09590		Os04g0690900	Os01g0888700
AT3G27150	AT1G07485		Os01g0749300	Os01g0180300
AT2G16800	AT5G63700		Os01g0750100	Os08g0563200
AT1G65480	AT5G57700		Os05g0316000	Os09g0440000
AT1G31940	AT1G03910		Os12g0617100	Os03g0675300
AT4G12580	AT3G58700		Os10g0364900	Os10g0416200
AT5G15030	AT1G74080		Os01g0956200	Os10g0394200
ATMG00290	AT3G01345		Os07g0554200	Os06g0192500
AT3G53950	AT3G21330		Os06g0590700	Os02g0728700
AT5G18220	AT3G06830		Os11g0592500	Os04g0600500
AT1G48470	AT4G14900		Os05g0527200	Os06g0236300
AT5G13670	AT5G52300		Os08g0374600	Os02g0503700
AT5G04490	AT1G78460		Os04g0125100	Os07g0182900
AT1G80200	AT5G07810		Os07g0140232	Os02g0575200
AT1G15640	AT3G46530		Os06g0706400	Os12g0633501
AT1G64860	AT1G24530		Os12g0266200	Os03g0609000
AT4G35410	AT4G27570		Os05g0464400	Os05g0438700
AT5G22040	AT2G32500		Os07g0429700	Os04g0644200
AT3G19580	AT2G36260		Os04g0662600	Os06g0186500
AT1G53210	AT2G40910		Os01g0246601	Os03g0108600
AT1G76260	AT2G30930		Os06g0154800	Os01g0832900
AT5G27920	AT4G09140		Os02g0821400	Os06g0270200
AT4G24190	AT1G76970		Os11g0303300	Os06g0653100
AT2G32700	AT2G14690		Os02g0186200	Os06g0121500
AT4G26220	AT3G46850		Os09g0442600	Os05g0535900
AT2G47920	AT5G27530		Os02g0244700	Os04g0560400
AT3G12530	AT2G01730		Os03g0714400	Os07g0640900
AT1G36990	AT5G22280		Os12g0639400	Os02g0640300
AT4G29160	AT2G01010		Os01g0189700	Os09g0439700
AT1G19990	AT1G08660		Os08g0356800	Os10g0512001
AT3G61730	AT1G70790		Os06g0470500	Os07g0685900
AT2G24280	AT4G32450		Os04g0172560	Os12g0164600
AT5G66620	AT2G39990		Os09g0103100	Os03g0452300
AT2G19110	AT1G50280		Os03g0329900	Os05g0110300
AT5G04850	AT1G66370		Os01g0565600	Os08g0369000
AT3G53030	AT4G24730		Os03g0673400	Os02g0179200
AT4G36450	AT5G57050		Os12g0628300	Os11g0141100
AT3G46270	AT5G06220		Os03g0823400	Os01g0871733
AT5G35770	AT2G27580		Os05g0186900	Os04g0512400
AT5G44400	AT5G13710		Os10g0187500	Os02g0568200
AT4G27370	AT5G67470		Os12g0520200	Os11g0133800
AT4G16130	AT2G23010		Os07g0486100	Os06g0567200
AT5G49940	AT2G26290		Os06g0622400	Os01g0341300
AT3G52100	AT3G59980		Os01g0864500	Os03g0106400
AT2G20362	AT2G47895		Os04g0142400	Os07g0418600
AT3G24460	AT5G59500		Os11g0246166	Os09g0298200
AT1G05310	AT1G53770		Os06g0143100	Os12g0122000
AT3G12360	AT1G12060		Os08g0178500	Os03g0121800
AT3G23210	AT3G62070		Os06g0265900	Os01g0753300
AT2G37650	AT5G05830		Os02g0591000	Os05g0412800
AT2G18320	AT2G22190		Os02g0556000	Os03g0102366
AT2G21150	AT5G25840		Os01g0144900	Os04g0298700
AT4G25570	AT3G18362		Os01g0875400	Os10g0400800
AT2G30115	AT1G02000		Os06g0470000	Os01g0311700
AT5G23535	AT4G39270		Os09g0276600	Os08g0478200
AT5G10380	AT1G54050		Os07g0534200	Os05g0443800
AT2G26670	AT5G42300		Os04g0653700	Os11g0539200
AT3G60966	AT2G26060		Os01g0138800	Os04g0662200
AT3G52580	AT5G01400		Os02g0770300	Os01g0950700
AT5G03370	AT4G37440		Os03g0198300	Os09g0461500
AT5G52547	AT1G07420		Os10g0521700	Os05g0476000
AT5G08415	AT1G50990		Os03g0640400	Os10g0147400
AT4G38730	AT1G75910		Os10g0415100	Os01g0883400
AT4G32830	AT5G52270		Os06g0306500	Os10g0102900
AT5G04060	AT4G00590		Os10g0106550	Os02g0674400
AT2G01680	AT5G12840		Os03g0200800	Os04g0191000
AT5G26000	AT4G10650		Os10g0541200	Os08g0481200
AT1G05730	AT3G11020		Os01g0214400	Os07g0424400
AT1G23170	AT5G18310		Os05g0116500	Os04g0441900
AT1G08005	AT3G28700		Os01g0186200	Os05g0463100
AT2G28180	AT2G01310		Os02g0722001	Os02g0267000
AT5G10970	AT3G52640		Os04g0635700	Os03g0756300
AT4G24580	AT1G78200		Os05g0119100	Os03g0249500
AT5G48980	AT2G45620		Os07g0117400	Os11g0421800
AT5G43910	AT5G05800		Os05g0584200	Os10g0533150
AT5G25980	AT4G37450		Os01g0661500	Os03g0726700
AT1G47395	AT2G18120		Os07g0517100	Os06g0125400
AT1G53450	AT3G28956		Os07g0235200	Os08g0490900
AT5G24650	AT4G12640		Os01g0954400	Os09g0247600
AT1G14490	AT1G12020		Os08g0500200	Os12g0262100
ATCG00120	AT4G21160		Os08g0326000	Os02g0752300
AT3G28540	AT5G38700		Os03g0727200	Os07g0555100
AT3G27240	AT2G36420		Os07g0476500	Os01g0819100
AT5G63140	AT5G42000		Os07g0670100	Os11g0104400
AT3G51250	AT3G48740		Os05g0141700	Os05g0160800
AT4G29990	AT1G16825		Os10g0420000	Os11g0141900
AT1G67238	AT4G03600		Os03g0169900	Os01g0848200
AT4G12650	AT4G34150		Os08g0492100	Os12g0441300
AT1G02160	AT1G06470		Os09g0479400	Os10g0176800
AT2G44578	AT3G11620		Os10g0485400	Os01g0327500
AT3G15354	AT5G06280		Os08g0390700	Os10g0578950
AT1G61226	AT3G13350		Os11g0630501	Os05g0193600
AT1G80330	AT5G56520		Os10g0441900	Os03g0338000
AT2G37980	AT4G29680		Os11g0444700	Os03g0327600
AT5G38770	AT3G24520		Os01g0248600	Os06g0122001
AT5G56340	AT5G22150		Os08g0433600	Os06g0278450
AT1G19660	AT1G54570		Os08g0128300	Os08g0477900
AT3G57830	AT2G38650		Os03g0667300	Os03g0433200
AT1G05280	AT3G54150		Os07g0258700	Os04g0434500
AT3G27490	AT3G49670		Os05g0231700	Os07g0619800
AT5G38550	AT5G41100		Os06g0206401	Os10g0397400
AT2G45480	AT5G40790		Os03g0842700	Os03g0732100
AT1G33170	AT5G18540		Os10g0487200	Os10g0413400
AT2G35200	AT5G45680		Os02g0733900	Os05g0579200
AT2G43610	AT1G13230		Os02g0650500	Os01g0657400
AT3G47800	AT1G31280		Os12g0606900	Os09g0539400
AT5G13740	AT5G11500		Os11g0667700	Os07g0656700
AT5G64370	AT4G35180		Os11g0544700	Os06g0658350
AT1G67190	AT1G28560		Os02g0741700	Os12g0533400
AT5G25590	AT3G05950		Os07g0180300	Os04g0345700
AT1G01830	AT3G18390		Os01g0962500	Os04g0530100
AT1G80760	AT3G58060		Os01g0613500	Os09g0543100
AT2G26230	AT1G12800		Os02g0608300	Os01g0917900
AT2G37540	AT4G35090		Os05g0157200	Os02g0730400
AT1G29100	AT3G25719		Os07g0530400	Os03g0591801
AT5G54130	AT5G11850		Os08g0398400	Os06g0594400
AT5G11840	AT2G39470		Os04g0527700	Os08g0174700
AT5G48600	AT1G29357		Os03g0857900	Os10g0476200
AT1G72010	AT5G09225		Os06g0637400	Os03g0195475
AT3G53920	AT1G07430		Os01g0121600	Os11g0433600
AT3G11840	AT5G18730		Os04g0436900	Os08g0261100
AT3G19330	AT3G05580		Os05g0561800	Os02g0697800
AT1G50440	AT5G45020		Os07g0196900	Os12g0273900
AT3G45630	AT1G16280		Os08g0413500	Os03g0854300
AT1G04860	AT1G16920		Os01g0121100	Os07g0523400
AT1G52800	AT5G50520		Os04g0407500	Os02g0805200
AT5G17010	AT1G15780		Os07g0271000	Os09g0548700
AT5G51500	AT1G20530		Os05g0126300	Os04g0376400
AT3G25860	AT3G55130		Os03g0806500	Os08g0428900
AT2G15560	AT5G49665		Os05g0341600	Os01g0918100
AT2G44630	AT1G13770		Os06g0636600	Os03g0781700
AT3G49230	AT4G09130		Os01g0730700	Os03g0197800
AT5G53320	AT3G09470		Os02g0216100	Os01g0866200
AT5G39250	AT5G37780		Os01g0691700	Os02g0529700
AT3G04200	AT1G72420		Os12g0428000	Os03g0746600
AT4G16480	AT1G01040		Os08g0556550	Os05g0512600
AT1G16400	AT5G58570		Os12g0283100	Os04g0174900
AT1G75540	AT4G14550		Os03g0146500	Os08g0512100
AT1G60810	AT2G32920		Os02g0225900	Os02g0720200
AT1G73370	AT1G02205		Os03g0398600	Os07g0633600
AT5G45400	AT1G25370		Os04g0482800	Os04g0584300
AT3G17030	AT1G16950		Os04g0529300	Os11g0150700
AT2G17190	AT5G50040		Os11g0611100	Os12g0622500
AT1G30110	AT2G46910		Os01g0801200	Os11g0482400
AT3G45730	AT5G55790		Os05g0110100	Os09g0508500
AT5G52370	AT5G57610		Os03g0734300	Os08g0133200
AT1G31490	AT2G03040		Os03g0179700	Os02g0757900
AT5G06960	AT1G59610		Os01g0252100	Os01g0286600
AT4G04680	AT5G39830		Os01g0174100	Os01g0556650
AT3G14570	AT1G29540		Os07g0249700	Os05g0521900
AT4G02725	AT3G54210		Os01g0689451	Os07g0511301
AT1G01800	AT3G52150		Os02g0518000	Os04g0177300
AT5G49070	AT2G01260		Os01g0124650	Os01g0882100
AT4G31730	AT2G23120		Os09g0353400	Os03g0165400
AT3G49070	AT1G12160		Os04g0137500	Os05g0414400
AT1G01920	AT5G26950		Os05g0372400	Os05g0384800
AT3G46160	AT3G54420		Os11g0207600	Os11g0116400
AT5G07450	AT5G03552		Os04g0686300	Os03g0328100
AT1G69690	AT2G26680		Os10g0528100	Os06g0237502
AT3G62100	AT1G05270		Os06g0646100	Os06g0109500
AT1G51560	AT3G18900		Os04g0675300	Os03g0242200
AT5G65030	AT1G02680		Os01g0382450	Os12g0480200
AT4G11550	AT1G12730		Os02g0149800	Os03g0152700
AT4G15140	AT3G11200		Os05g0112101	Os06g0612900
AT1G11930	AT1G12970		Os04g0254300	Os10g0421800
AT4G00750	AT4G32660		Os04g0228000	Os09g0553200
AT3G28560	AT3G19500		Os01g0960500	Os01g0652000
AT3G47965	AT1G17280		Os01g0382400	Os07g0120200
AT4G29790	AT5G43300		Os01g0959100	Os08g0158900
AT3G22630	AT4G12960		Os01g0124100	Os02g0139300
AT3G25710	AT2G39760		Os04g0683900	Os05g0156300
AT4G34420	AT3G12630		Os12g0639800	Os05g0555100
AT4G05095	AT5G20650		Os01g0770500	Os05g0577100
AT3G57520	AT5G42810		Os04g0399300	Os12g0108600
AT4G21745	AT2G26650		Os02g0758200	Os08g0475100
AT1G27770	AT4G09500		Os04g0643700	Os06g0659100
AT1G64900	AT5G67440		Os10g0569800	Os12g0577600
AT1G79529	AT1G26260		Os03g0374400	Os06g0710850
AT2G04039	AT1G04570		Os05g0359700	Os01g0130400
AT1G17590	AT3G61710		Os03g0660000	Os12g0106000
AT4G27360	AT5G01810		Os11g0444400	Os09g0438000
AT4G28310	AT4G34730		Os05g0447200	Os06g0234633
AT4G13510	AT5G15780		Os01g0808100	Os08g0101600
AT3G49830	AT1G22440		Os03g0800000	Os04g0658400
AT1G22430	AT4G11280		Os02g0118200	Os01g0844200
AT5G07080	AT2G03150		Os05g0172400	Os07g0638000
AT3G27440	AT1G69360		Os01g0610700	Os03g0709100
AT1G10210	AT2G40230		Os02g0119400	Os06g0159450
AT1G21640	AT1G30900		Os01g0261500	Os12g0108100
AT1G55770	AT1G60095		Os08g0385900	Os06g0180100
AT5G26030	AT3G13772		Os12g0570400	Os03g0809900
AT1G33860	AT5G23010		Os01g0934200	Os11g0249700
AT3G47720	AT1G20810		Os08g0130100	Os05g0105401
AT4G22105	AT3G44620		Os06g0354600	Os06g0687400
AT1G04330	AT4G31870		Os02g0572200	Os03g0323200
AT5G39890	AT1G13550		Os09g0536800	Os07g0529700
AT3G28310	AT4G27657		Os12g0586000	Os05g0180400
AT1G04150	AT1G67530		Os05g0128400	Os12g0502300
AT1G09370	AT4G31380		Os01g0655500	Os04g0583500
AT3G06300	AT5G41460		Os09g0478733	Os03g0138500
AT2G42030	AT5G39130		Os03g0796900	Os05g0498500
AT1G25440	AT4G10760		Os03g0673700	Os01g0329900
AT4G33020	AT3G25577		Os01g0148100	Os04g0649700
AT5G48190	AT2G35840		Os12g0514400	Os12g0115900
AT5G63730	AT3G07680		Os01g0128000	Os06g0571400
AT2G44340	AT1G51200		Os05g0500400	Os01g0623900
AT5G28650	AT1G01510		Os01g0560200	Os09g0507100
AT2G20630	AT4G03420		Os06g0206300	Os02g0175400
AT1G54130	AT1G71190		Os11g0117300	Os03g0637900
AT3G29100	AT1G50732		Os02g0735900	Os08g0413200
AT5G05370	AT5G46780		Os06g0142550	Os01g0323300
AT1G61380	AT4G39250		Os08g0335000	Os04g0350700
AT3G53365	AT4G16360		Os11g0131100	Os01g0315700
AT5G05945	AT1G80440		Os01g0346700	Os02g0820200
AT3G50070	AT3G54080		Os03g0192900	Os03g0311600
AT4G17098	AT1G23180		Os06g0127000	Os05g0589700
AT1G11880	AT4G28320		Os01g0117600	Os03g0781600
AT5G22660	AT1G77122		Os10g0540100	Os02g0255100
AT3G03870	AT3G11930		Os06g0716100	Os04g0103200
AT1G11905	AT3G07290		Os01g0516600	Os11g0523700
AT3G51895	AT5G40690		Os08g0511900	Os01g0207200
AT2G26870	AT5G06950		Os09g0472100	Os03g0140500
AT2G15128	ATCG01070		Os05g0458000	Os04g0284900
AT1G76660	AT3G15518		Os03g0791200	Os04g0536300
AT1G77330	AT3G47836		Os04g0121900	Os12g0199500
AT5G05930	AT3G42800		Os02g0245200	Os08g0564700
AT1G07890	AT1G20500		Os08g0174750	Os01g0641800
AT2G40900	AT2G34590		Os02g0812400	Os02g0596000
AT4G29490	AT1G55250		Os01g0888900	Os10g0344550
AT5G06420	AT4G27100		Os09g0420600	gene-psbB
AT1G80865	AT2G43530		Os07g0159900	Os01g0224200
AT5G56130	AT4G28440		Os01g0102900	Os02g0556900
AT5G63930	AT4G36490		Os03g0681750	Os05g0334750
AT5G55860	AT5G47390		Os04g0385600	Os06g0692800
AT5G07510	AT5G25140		Os07g0632000	Os04g0350300
AT3G19260	AT5G27860		Os02g0453300	Os05g0391200
AT3G48640	AT4G25550		Os07g0458025	Os05g0556300
AT1G69600	AT5G52020		Os08g0395700	Os01g0848300
AT2G19830	AT3G53810		Os01g0724700	Os07g0645900
AT1G33540	AT2G34200		Os12g0468500	Os02g0597700
AT4G33390	AT1G78910		Os02g0731500	Os03g0293400
AT3G60245	AT3G61800		Os09g0341500	Os11g0700100
AT4G33720	AT2G35635		Os01g0595400	Os09g0526200
AT3G28900	AT4G37090		Os09g0130300	Os04g0412700
AT4G37810	AT5G13080		Os11g0162900	Os10g0351500
AT2G45820	AT2G36580		Os12g0503000	Os06g0346600
AT4G27220	AT5G19200		Os04g0382200	Os12g0135500
AT2G02840	AT5G58870		Os11g0536800	Os02g0740900
AT5G61520	AT5G17830		Os02g0211100	Os12g0605100
AT2G20721	AT1G55020		Os12g0503200	Os08g0288200
AT5G03995	AT1G53903		Os12g0106200	Os01g0534900
AT2G19060	AT2G38280		Os01g0803200	Os12g0156866
AT4G13992	AT4G29250		Os04g0589200	Os02g0280400
AT2G35130	AT3G24535		Os08g0331000	Os06g0236600
AT1G63310	AT5G19480		Os08g0533600	Os02g0173700
AT1G78815	AT2G01900		Os06g0324000	Os03g0322700
AT2G35300	AT4G36810		Os06g0148600	Os05g0552300
AT3G43250	AT1G31180		Os01g0783700	Os07g0601600
AT1G10970	AT2G37200		Os04g0126900	Os01g0800500
AT4G23890	AT3G13670		Os12g0506500	Os02g0804000
AT4G25200	AT4G35070		Os03g0682666	Os07g0121200
AT5G49615	AT4G34138		Os08g0516600	Os10g0479900
AT3G49845	ATMG01120		Os05g0591900	Os03g0653601
AT1G76380	AT4G02570		Os01g0126200	Os02g0192500
AT1G26100	AT1G61870		Os05g0397800	Os12g0581300
AT5G04440	AT1G31720		Os02g0598500	Os12g0106500
AT3G12915	AT3G56380		Os01g0135700	Os01g0583900
AT5G19640	AT4G19610		Os10g0145100	Os07g0593100
AT5G62240	AT2G18750		Os08g0450900	Os01g0683525
AT1G14640	AT2G21630		Os01g0729900	Os03g0209500
AT3G13300	AT4G15880		Os05g0138200	Os06g0116100
AT3G12880	AT3G51500		Os01g0881500	Os06g0130200
AT2G04378	AT1G54350		Os07g0122100	Os09g0533900
AT4G39770	AT3G47520		Os07g0585500	Os05g0317400
AT2G14530	AT1G66100		Os05g0400600	Os06g0685250
AT4G01593	AT4G15900		Os03g0663500	Os06g0725550
ATCG00050	AT1G64400		Os04g0605100	Os07g0614400
AT3G53110	AT5G54380		Os01g0807532	Os02g0463500
AT2G46530	AT4G34940		Os01g0702900	Os03g0323350
AT5G04420	AT1G73965		Os04g0587500	Os03g0371600
AT3G13672	AT3G16480		Os01g0905300	Os03g0650350
AT5G27395	AT4G33030		Os07g0571700	Os09g0559200
AT5G25290	AT4G33930		Os02g0627900	Os01g0700300
AT4G17960	AT4G17310		Os01g0690600	Os03g0406100
AT4G34210	AT5G54170		Os08g0338200	Os09g0542700
AT4G19170	AT3G29810		Os12g0566800	Os12g0225900
AT5G46610	AT3G15820		Os02g0711400	Os07g0249600
AT5G08040	AT3G16690		Os03g0839000	Os04g0109500
AT1G05490	AT4G17370		Os05g0121000	Os08g0192400
AT5G04840	AT3G63390		Os06g0276300	Os07g0634600
AT1G34040	AT5G46460		Os12g0482500	Os12g0551900
AT1G50620	AT3G56450		Os07g0440900	Os05g0358200
AT5G06200	AT5G10930		Os04g0556100	Os04g0490300
AT4G36700	AT4G37260		Os08g0526300	Os05g0503300
AT4G18780	AT3G25670		Os07g0226200	Os11g0106700
AT3G06170	AT1G43650		Os10g0463800	Os06g0472400
AT2G30760	AT5G54040		Os06g0158100	Os09g0330000
AT4G26430	AT3G14650		Os05g0392700	Os03g0577000
AT1G65560	AT4G19560		Os03g0319100	Os03g0705800
AT1G23900	AT4G31650		Os10g0527800	Os04g0250700
AT1G64980	AT4G12340		Os01g0756400	Os01g0118100
AT1G71790	AT4G15258		Os04g0635400	Os03g0279200
AT4G21770	AT3G49725		Os09g0491740	Os04g0563700
AT1G71010	AT5G59390		Os01g0130000	Os01g0972900
AT5G17590	AT5G49490		Os05g0242600	Os04g0510300
AT2G27790	AT5G66020		Os01g0305200	Os01g0719300
AT1G48300	AT1G68920		Os03g0432000	Os02g0257300
AT5G05820	AT5G11080		Os02g0592000	Os01g0759000
AT1G08260	AT5G14410		Os01g0824800	Os03g0652000
AT2G46610	AT3G15980		Os09g0397700	Os12g0256900
AT2G23321	AT3G61770		Os02g0226500	Os09g0423600
AT3G48160	AT5G10910		Os08g0530000	Os05g0533600
AT5G67460	AT3G50560		Os06g0286310	Os04g0481500
AT3G03810	AT2G37250		Os07g0438550	Os04g0347400
AT4G38950	AT1G04990		Os05g0142100	Os09g0491788
AT1G73730	AT1G53165		Os01g0918500	Os06g0297600
AT4G35220	AT3G09540		Os06g0329900	Os04g0439900
AT4G04790	AT5G09950		Os03g0686500	Os12g0490100
AT1G69720	AT2G46735		Os07g0291100	Os04g0455600
AT2G21800	AT3G58940		Os01g0727700	Os10g0407500
AT5G01870	AT3G05030		Os07g0143401	Os03g0215900
AT1G48500	AT1G75410		Os02g0137500	Os11g0587300
AT1G80745	AT5G02240		Os04g0414300	Os02g0642600
AT5G37440	AT2G25950		Os08g0107400	Os09g0474300
AT5G37055	AT1G17070		Os05g0125250	Os05g0241000
AT3G11480	AT5G04790		Os09g0560900	Os01g0180000
ATCG00065	AT2G01660		Os01g0639600	Os05g0122600
AT1G47750	AT3G23570		Os07g0643400	Os07g0636000
AT4G20240	AT5G13190		Os08g0360300	Os08g0549600
AT2G28760	AT2G41350		Os02g0771450	Os01g0674700
AT5G23530	AT5G12310		Os07g0657400	Os01g0914000
AT1G01183	AT2G42580		Os02g0737200	Os03g0619151
AT5G45500	AT3G03950		Os04g0679000	Os04g0436000
AT2G11851	AT2G17370		Os07g0669900	Os04g0664400
AT4G31960	AT5G08080		Os03g0809300	Os01g0226200
AT5G66260	AT1G26250		Os03g0257600	Os11g0422100
AT3G19895	AT4G12490		Os12g0131000	Os11g0648400
AT2G39445	AT3G45090		Os06g0666500	Os05g0251400
AT5G03270	AT1G54710		Os09g0113000	Os07g0693100
AT1G54080	AT5G48485		Os01g0544200	Os04g0404900
AT4G15230	AT1G60160		Os08g0478466	Os08g0559600
			Os03g0562200	Os11g0168200
			Os03g0794200	Os06g0664400
			Os01g0269000	Os01g0120800
			Os06g0141200	Os04g0419600
			Os03g0288000	Os05g0566300
			Os11g0227000	Os02g0143200
			Os03g0119000	Os02g0617100
			Os08g0440100	Os09g0488800
			Os01g0609300	Os05g0424800
			Os07g0479600	Os01g0197500
			Os06g0700550	Os11g0201360
			Os07g0180000	Os06g0320300
			Os03g0693700	Os10g0512800
			Os02g0514150	Os06g0176801
			Os08g0488700	Os01g0929200
			Os11g0606400	Os01g0940100
			Os02g0122600	Os07g0659500
			Os09g0242800	Os10g0390600
			Os06g0670300	Os09g0437100
			Os10g0515200	Os10g0377150
			Os12g0209800	Os03g0773600
			Os07g0114000	Os05g0574300
			Os06g0220000	Os05g0350600
			Os05g0549800	Os03g0211900
			Os10g0481000	Os08g0127600
			Os05g0157100	Os02g0198400
			Os01g0624500	Os05g0476200
			Os09g0440300	Os09g0528750
			Os05g0355400	Os04g0653600
			Os05g0145900	Os03g0101700
			Os02g0326000	Os02g0590200
			Os02g0600650	Os08g0525800
			Os02g0201000	Os07g0490450
			Os09g0314333	Os02g0120000
			Os04g0530300	Os09g0498800
			Os09g0491692	Os05g0205100
			Os04g0231200	Os03g0712400
			Os03g0356484	Os04g0486500
			Os03g0261500	Os01g0814800
			Os09g0451000	Os02g0308400
			Os04g0598000	Os09g0449400
			Os01g0224400	Os05g0470800
			Os04g0488600	Os12g0235800
			Os01g0891601	Os05g0111000
			Os06g0267600	Os04g0381100
			Os01g0624000	Os03g0337800
			Os04g0578700	Os03g0748100
			Os06g0171900	Os02g0122700
			Os01g0192500	Os02g0826200
			Os04g0612900	Os02g0118400
			Os03g0722100	Os01g0152900
			Os11g0580800	Os08g0190700
			Os05g0560900	Os02g0684500
			Os08g0515900	Os12g0124700
			Os09g0315800	Os09g0420300
			Os01g0925200	Os02g0761200
			Os12g0190875	Os03g0771500
			Os01g0734000	Os07g0596000
			Os07g0267200	Os01g0889800
			Os01g0718700	Os08g0429225
			Os05g0550300	Os01g0170051
			Os06g0308900	Os03g0808000
			Os01g0219300	Os10g0347000
			Os12g0512100	Os02g0276900
			Os06g0639500	Os03g0296500
			Os04g0471300	Os04g0445700
			Os01g0695800	Os06g0192900
			Os02g0498100	Os08g0390100
			Os01g0124401	Os01g0878200
			Os07g0242050	Os04g0673700
			Os12g0567200	Os03g0729700
			Os10g0544500	Os03g0221500
			Os06g0259901	Os01g0760900
			Os05g0458400	Os08g0177800
			Os01g0908001	Os03g0761000
			Os05g0439200	Os01g0210800
			Os02g0539200	Os07g0490500
			Os03g0271600	Os08g0260400
			Os12g0198000	Os08g0280100
			Os07g0170000	Os07g0165700
			Os03g0275900	Os12g0539750
			Os06g0675900	Os05g0325400
			Os10g0522000	Os01g0663300
			Os01g0678800	Os08g0157400
			Os02g0202200	Os03g0269601
			Os05g0104700	Os01g0299150
			Os02g0797100	Os06g0225900
			Os06g0571100	Os02g0120500
			Os03g0737000	Os08g0192800
			Os10g0447100	Os09g0361500
			Os04g0106400	Os09g0100800
			Os04g0378400	Os11g0108800
			Os04g0639200	Os06g0542200
			Os10g0564800	Os09g0114500
			Os12g0199200	Os07g0694400
			Os08g0139000	Os06g0597500
			Os11g0265000	Os02g0257500
			Os10g0567800	Os03g0750300
			Os02g0613200	Os07g0616600
			Os03g0426350	Os06g0283400
			Os02g0574500	Os01g0321300
			Os04g0172400	Os06g0652400
			Os01g0726801	Os06g0697000
			Os07g0540600	Os11g0592700
			Os02g0435400	Os04g0684600
			Os05g0407500	Os10g0116900
			Os10g0506900	Os06g0184200
			Os07g0142000	Os10g0551401
			Os07g0619500	Os09g0241550
			Os03g0174900	Os01g0144000
			Os03g0348500	Os03g0707250
			Os06g0505400	gene-rpoB
			Os02g0294100	Os01g0129200
			Os12g0559200	Os03g0100020
			Os02g0690000	Os11g0546000
			Os07g0629300	Os01g0180700
			Os01g0665300	Os01g0965300
			Os06g0238200	Os10g0403700
			Os08g0412200	Os04g0514400
			Os01g0321900	Os11g0585700
			Os02g0525100	gene-ccmC
			Os02g0772200	Os02g0114600
			Os01g0700000	Os03g0635800
			Os05g0114400	Os06g0239600
			Os04g0534801	Os02g0589700
			Os04g0182701	Os08g0230200
			Os07g0527750	Os02g0122400
			Os09g0380050	Os02g0678800
			Os08g0233900	Os02g0638400
			Os01g0895500	Os08g0198800
			Os11g0307500	Os11g0112400
			Os11g0686250	Os09g0421166
			Os12g0112300	Os11g0472600
			Os10g0558850	Os11g0138700
			Os10g0155400	Os02g0439700
			Os09g0459800	Os03g0184300
			Os01g0112500	Os10g0478100
			Os04g0669600	Os01g0367900
			Os01g0615050	Os06g0127800
			Os08g0383700	Os02g0831400
			Os05g0392200	Os08g0109000
			Os01g0848900	Os03g0826500
			Os03g0638400	Os05g0513100
			Os12g0112800	Os10g0575700
			Os05g0129300	Os09g0533200
			Os03g0795200	Os09g0556300
			Os03g0270000	Os07g0180900
			Os12g0158700	Os03g0422200
			Os08g0474600	Os03g0692400
			Os10g0497700	Os07g0681100
			Os01g0800900	Os07g0516200
			Os07g0158900	Os03g0845500
			Os06g0590301	Os03g0636700
			Os11g0639400	Os04g0666900
			Os02g0743200	Os02g0833400
			Os07g0416600	Os03g0187525
			Os03g0110300	Os02g0555700
			Os04g0413900	Os01g0121700
			Os04g0373400	Os02g0582200
			Os01g0920200	Os01g0719800
			Os10g0416100	Os10g0462900
			Os03g0279700	Os04g0472700
			Os04g0450300	Os08g0543400
			Os06g0165600	Os04g0409200
			Os05g0126800	Os03g0712700
			Os08g0438400	Os04g0137201
			Os11g0104150	Os03g0359100
			Os11g0591800	Os02g0135900
			Os01g0311400	Os06g0256000
			Os06g0246000	Os10g0516200
			Os04g0402700	Os01g0749100
			Os07g0113300	Os03g0746500
			Os08g0120500	Os09g0424300
			Os05g0170200	Os12g0144600
			Os07g0606600	Os05g0543200
			Os03g0734900	Os06g0561800
			Os01g0141100	Os07g0531700
			Os02g0189566	Os05g0587200
			Os04g0589500	Os11g0479400
			Os04g0150300	Os09g0421200
			Os09g0421100	Os04g0510500
			Os07g0417800	Os06g0118900
			Os10g0542200	Os11g0522900
			Os05g0192700	Os03g0281201
			Os08g0346900	Os02g0799100
			Os02g0721600	Os10g0146200
			Os03g0306700	Os06g0696566
			Os06g0321700	Os06g0662150
			Os01g0507300	Os10g0333000
			Os02g0511100	Os11g0170200
			Os01g0642200	Os11g0602300
			Os02g0699000	Os03g0640000
			Os09g0416800	Os05g0339000
			Os01g0314100	Os01g0374600
			Os12g0535400	Os08g0161900
			Os03g0159800	Os06g0656201
			Os09g0268300	Os09g0316000
			Os04g0383700	Os04g0619800
			Os12g0577800	Os05g0206800
			Os01g0191900	Os02g0669000
			Os03g0351700	Os03g0216000
			Os01g0185000	Os04g0645600
			Os03g0748700	Os05g0593900
			Os01g0310600	Os01g0878300
			Os12g0112200	Os05g0150100
			Os09g0251400	Os12g0552800
			Os02g0292800	Os07g0211900
			Os06g0202100	Os05g0366900
			Os01g0126401	Os05g0430700
			Os01g0866400	Os07g0207301
			Os12g0229100	Os12g0114800
			Os12g0430900	Os07g0658600
			Os03g0755625	Os02g0566800
			Os12g0618800	Os03g0227900
			Os08g0453200	Os01g0142100
			Os01g0885700	Os01g0589900
			Os10g0502300	Os03g0733600
			Os10g0545800	Os04g0665400
			Os02g0720500	Os02g0744700
			Os02g0215400	Os01g0608900
			Os06g0611900	Os01g0763100
			Os04g0136900	Os03g0817900
			Os01g0837900	Os07g0418700
			Os07g0637300	Os02g0782800
			Os08g0453733	Os01g0866000
			Os01g0752500	Os05g0255800
			Os06g0142500	Os01g0373500
			Os11g0205800	Os11g0102900
			Os11g0667000	Os05g0558400
			Os01g0734100	Os03g0831500
			Os04g0645700	Os01g0182700
			Os05g0545000	Os02g0577100
			Os11g0448700	Os11g0667400
			Os07g0649400	Os01g0117100
			Os01g0309900	Os03g0773700
			Os09g0510000	Os08g0387200
			Os06g0498800	Os03g0569900
			Os04g0494800	Os05g0172300
			Os04g0311500	Os08g0184300
			Os05g0551100	Os07g0144500
			Os02g0532300	Os09g0569151
			Os09g0518700	Os12g0263050
			Os07g0174766	Os01g0757600
			Os02g0518600	Os03g0122100
			Os05g0467300	Os08g0276000
			Os06g0200600	Os08g0151300
			Os07g0647800	Os04g0512300
			Os11g0606600	Os10g0117800
			Os12g0155400	Os02g0219200
			Os08g0535000	Os10g0132500
			Os01g0946200	Os01g0303600
			Os03g0243350	Os07g0642800
			Os01g0631800	Os11g0523500
			Os10g0462500	Os03g0214100
			Os07g0673200	Os02g0805800
			Os02g0223200	Os12g0167900
			Os12g0575400	Os05g0147500
			Os04g0405300	Os03g0640100
			Os09g0364400	Os06g0684000
			Os06g0726100	Os03g0227300
			Os03g0369800	Os08g0107600
			Os07g0142200	Os03g0761500
			Os09g0497600	Os08g0499100
			Os01g0548600	Os08g0497300
			Os09g0491852	Os10g0148100
			Os09g0129600	Os09g0542000
			Os05g0554601	Os05g0526400
			Os02g0305700	Os04g0496400
			Os07g0661600	Os01g0719400
			Os12g0605400	Os03g0100010
			Os02g0737401	Os01g0917200
			Os02g0570700	Os05g0408900
			Os07g0669600	Os06g0163900
			Os01g0891300	Os09g0502100
			Os06g0486800	Os01g0207900
			Os02g0620600	Os05g0390100
			Os03g0431100	Os11g0460700
			Os02g0783625	Os12g0112000
			Os02g0101600	Os11g0168100
			Os04g0563100	Os01g0581300
			Os08g0225050	Os05g0436100
			Os08g0233000	Os04g0442200
			Os10g0462100	Os04g0605900
			Os12g0149100	Os04g0506900
			Os10g0441800	Os02g0556700
			Os03g0161000	Os07g0109400
			Os10g0379100	Os07g0159700
			Os11g0186200	Os09g0306566
			Os05g0108300	Os04g0458000
			Os04g0500600	Os02g0459300
			Os03g0236300	Os01g0121200
			Os05g0405900	Os05g0567300
			Os07g0609000	Os02g0103700
			Os04g0394766	Os05g0304900
			Os04g0531400	Os01g0205200

## Sheet: Functional annotation Ath
	GO biological process complete	Ref list	Input genes	Expected	FE	P	adjusted P
positive	cellular response to iron ion starvation (GO:0010106)	8	7	0.33	21.06	1.62e-09	9.11e-06
loadings	DNA-templated DNA replication (GO:0006261)	106	18	4.4	4.09	3.61e-07	0.000508
	phloem development (GO:0010088)	31	9	1.29	6.99	3.15e-06	0.00161
	DNA repair (GO:0006281)	329	33	13.67	2.41	3.9e-06	0.00183
	regulation of amino acid transport (GO:0051955)	7	5	0.29	17.19	2.4e-06	0.00193
	plant-type secondary cell wall biogenesis (GO:0009834)	64	12	2.66	4.51	1.11e-05	0.00391
	DNA recombination (GO:0006310)	168	20	6.98	2.87	2.37e-05	0.0074
	chromosome organization (GO:0051276)	197	22	8.19	2.69	2.6e-05	0.00769
	regulation of iron ion transport (GO:0034756)	7	4	0.29	13.75	9.38e-05	0.0211
	stomatal complex morphogenesis (GO:0010103)	36	8	1.5	5.35	9.28e-05	0.0218
	mRNA transcription (GO:0009299)	13	5	0.54	9.26	0.000119	0.0249
	spindle assembly (GO:0051225)	49	9	2.04	4.42	0.000164	0.0329
	root radial pattern formation (GO:0090057)	9	4	0.37	10.7	0.000316	0.0494
	GO biological process complete	Ref list	Input genes	Expected	FE	P	adjusted P
negative	regulation of stomatal movement (GO:0010119)	113	18	4.85	3.71	1.51e-06	0.000315
loadings	autophagosome maturation (GO:0097352)	14	6	0.6	9.99	1.37e-05	0.00164
	cellular response to nitrogen starvation (GO:0006995)	39	9	1.67	5.38	3.16e-05	0.00291
	defense response to bacterium (GO:0042742)	391	35	16.77	2.09	4.27e-05	0.0037
	response to water deprivation (GO:0009414)	421	37	18.06	2.05	4.49e-05	0.00382
	beta-alanine biosynthetic process (GO:0019483)	3	3	0.13	23.31	7.88e-05	0.00561
	uracil catabolic process (GO:0006212)	3	3	0.13	23.31	7.88e-05	0.00568
	detection of redox state (GO:0051776)	3	3	0.13	23.31	7.88e-05	0.00575
	plant-type hypersensitive response (GO:0009626)	54	10	2.32	4.32	8.69e-05	0.00611
	late endosome to vacuole transport via multivesicular body sorting pathway (GO:0032511)	27	7	1.16	6.04	0.00011	0.00717
	response to molecule of fungal origin (GO:0002238)	21	6	0.9	6.66	0.000192	0.0113
	porphyrin-containing compound catabolic process (GO:0006787)	21	6	0.9	6.66	0.000192	0.0115
	phospholipid catabolic process (GO:0009395)	22	6	0.94	6.36	0.000254	0.0143
	response to salicylic acid (GO:0009751)	180	19	7.72	2.46	0.000284	0.0156
	small molecule catabolic process (GO:0044282)	230	22	9.87	2.23	0.000438	0.022
	fatty acid metabolic process (GO:0006631)	258	24	11.07	2.17	0.000482	0.0238
	negative regulation of defense response to bacterium (GO:1900425)	17	5	0.73	6.86	0.000579	0.0274
	aerobic electron transport chain (GO:0019646)	46	8	1.97	4.05	0.000684	0.0313
	mitochondrial ATP synthesis coupled electron transport (GO:0042775)	46	8	1.97	4.05	0.000684	0.0315
	intralumenal vesicle formation (GO:0070676)	5	3	0.21	13.99	0.000738	0.0319
	response to carbon starvation (GO:0090549)	5	3	0.21	13.99	0.000738	0.0322
	malonyl-CoA biosynthetic process (GO:2001295)	5	3	0.21	13.99	0.000738	0.0324
	heme metabolic process (GO:0042168)	27	6	1.16	5.18	0.000839	0.0349
	pattern recognition receptor signaling pathway (GO:0002221)	27	6	1.16	5.18	0.000839	0.0352
	cellular response to oxidative stress (GO:0034599)	71	10	3.05	3.28	0.000869	0.0359
	response to iron ion (GO:0010039)	28	6	1.2	5	0.00103	0.0413
	multicellular organismal-level iron ion homeostasis (GO:0060586)	29	6	1.24	4.82	0.00125	0.0472
	zinc ion transport (GO:0006829)	29	6	1.24	4.82	0.00125	0.0475

## Sheet: Functional annotation Os
	GO biological process complete	Ref list	Input genes	Expected	FE	P	adjusted P
positive	ubiquitin-dependent protein catabolic process (GO:0006511)	361	30	11.95	2.51	4.59e-06	0.00167
loadings	fatty acid beta-oxidation (GO:0006635)	27	7	0.89	7.83	2.13e-05	0.00581
	peroxisome organization (GO:0007031)	33	7	1.09	6.41	8.61e-05	0.0145
	vesicle-mediated transport (GO:0016192)	463	32	15.32	2.09	0.00011	0.0178
	autophagy (GO:0006914)	53	8	1.75	4.56	0.000333	0.0469
	GO biological process complete	Ref list	Input genes	Expected	FE	P	adjusted P
negative	cell wall organization (GO:0071555)	323	35	10.68	3.28	9.99e-10	9.29e-08
loadings	spindle assembly (GO:0051225)	38	11	1.26	8.75	2.64e-08	1.92e-06
	homologous chromosome pairing at meiosis (GO:0007129)	16	7	0.53	13.23	3.76e-07	2.22e-05
	mitotic sister chromatid segregation (GO:0000070)	26	8	0.86	9.3	1.29e-06	6.48e-05
	microtubule-based movement (GO:0007018)	56	11	1.85	5.94	1.89e-06	9.19e-05
	DNA replication initiation (GO:0006270)	21	7	0.69	10.08	3.3e-06	0.000152
	carbohydrate biosynthetic process (GO:0016051)	260	24	8.6	2.79	6.94e-06	0.0003
	fucose metabolic process (GO:0006004)	33	8	1.09	7.33	9.32e-06	0.000392
	double-strand break repair via break-induced replication (GO:0000727)	11	5	0.36	13.74	1.54e-05	0.000616
	mitotic spindle organization (GO:0007052)	22	6	0.73	8.25	6.13e-05	0.00221
	regulation of spindle organization (GO:0090224)	5	3	0.17	18.14	0.000343	0.0104
	plant-type primary cell wall biogenesis (GO:0009833)	31	6	1.03	5.85	0.000469	0.0131
	mitotic DNA replication (GO:1902969)	12	4	0.4	10.08	0.000477	0.0132
	resolution of meiotic recombination intermediates (GO:0000712)	12	4	0.4	10.08	0.000477	0.0133
	negative regulation of cell cycle (GO:0045786)	43	7	1.42	4.92	0.000485	0.0133
	cellulose biosynthetic process (GO:0030244)	44	7	1.46	4.81	0.00056	0.015
	DNA unwinding involved in DNA replication (GO:0006268)	13	4	0.43	9.3	0.000671	0.017
	DNA strand elongation involved in DNA replication (GO:0006271)	13	4	0.43	9.3	0.000671	0.0171
	triose phosphate transmembrane transport (GO:0035436)	6	3	0.2	15.12	0.00067	0.0172
	maintenance of meiotic sister chromatid cohesion (GO:0034090)	2	2	0.07	30.23	0.00109	0.0251
	replication-born double-strand break repair via sister chromatid exchange (GO:1990414)	2	2	0.07	30.23	0.00109	0.0253
	thigmotropism (GO:0009652)	2	2	0.07	30.23	0.00109	0.0254
	radial pattern formation (GO:0009956)	7	3	0.23	12.96	0.00114	0.0254
	protein localization to microtubule (GO:0035372)	2	2	0.07	30.23	0.00109	0.0256
	meiotic sister chromatid segregation (GO:0045144)	2	2	0.07	30.23	0.00109	0.0257
	xanthophyll biosynthetic process (GO:0016123)	7	3	0.23	12.96	0.00114	0.0258
	protein polymerization (GO:0051258)	25	5	0.83	6.05	0.0012	0.0265
	heterochromatin organization (GO:0070828)	50	7	1.65	4.23	0.00123	0.0269
	plant-type secondary cell wall biogenesis (GO:0009834)	52	7	1.72	4.07	0.00156	0.0328
	chlorophyll biosynthetic process (GO:0015995)	28	5	0.93	5.4	0.00205	0.0407
	peptidyl-L-cysteine S-palmitoylation (GO:0018230)	28	5	0.93	5.4	0.00205	0.0411
	protein-RNA complex assembly (GO:0022618)	137	12	4.53	2.65	0.00205	0.0414
	deoxyribonucleotide biosynthetic process (GO:0009263)	9	3	0.3	10.08	0.00261	0.0455
	female meiotic nuclear division (GO:0007143)	9	3	0.3	10.08	0.00261	0.0457
	pectin metabolic process (GO:0045488)	88	9	2.91	3.09	0.00254	0.0457
	regulation of mitotic metaphase/anaphase transition (GO:0030071)	18	4	0.6	6.72	0.00252	0.0458
	male meiotic nuclear division (GO:0007140)	18	4	0.6	6.72	0.00252	0.046
	glucose metabolic process (GO:0006006)	57	7	1.89	3.71	0.00266	0.046
	response to glucose (GO:0009749)	9	3	0.3	10.08	0.00261	0.0462
	phospholipid catabolic process (GO:0009395)	18	4	0.6	6.72	0.00252	0.0462
	chloroplast fission (GO:0010020)	18	4	0.6	6.72	0.00252	0.0464
	guard cell differentiation (GO:0010052)	18	4	0.6	6.72	0.00252	0.0466
	DNA biosynthetic process (GO:0071897)	42	6	1.39	4.32	0.00245	0.0468
	carbohydrate catabolic process (GO:0016052)	292	20	9.66	2.07	0.00247	0.0469
	regulation of cyclin-dependent protein serine/threonine kinase activity (GO:0000079)	43	6	1.42	4.22	0.00277	0.0473
	ribosomal small subunit biogenesis (GO:0042274)	73	8	2.41	3.31	0.00281	0.0473
	regulation of cellular response to stress (GO:0080135)	30	5	0.99	5.04	0.00281	0.0478
	fatty acid biosynthetic process (GO:0006633)	125	11	4.13	2.66	0.00298	0.0497
