# Supplementary material for: Transcriptome-derived networks reconstruct distinct immune strategies under different iron availability between Arabidopsis and rice
Source: Research Square preprint supplement (doi:10.21203/rs.3.rs-3214423/v1), 2024-07-15
Supplement: Supplementary file 4 [file 451c47454ba1f450ae65c647.xlsx]

## Sheet: Supplementary Data 14
specific AthTFs			commonTFs			specific OsTFs
AthTF	rice ortholog		AthTF	OsTF		Arabidopsis ortholog	rice ortholog
AT1G74930	Os04g0572400		AT1G29860	Os03g0657400		AT2G38470	Os01g0714800
AT5G04150	Os01g0952800		AT5G14750	Os04g0517100		AT4G36920	Os05g0536250
AT4G17500	Os01g0752500		AT5G67411	Os04g0590400		AT1G56010	Os03g0133000
AT3G02990	Os02g0232000		AT5G43290	Os03g0657400		AT2G23320	Os01g0624700
AT3G01600	Os01g0191300		AT2G43140	Os04g0489600		AT1G56010	Os12g0156100
AT3G09600	Os02g0680700		AT4G37730	Os02g0132500		AT1G56010	Os03g0327800
AT4G17490	Os01g0752500		AT2G21650	Os05g0195700		AT1G56010	Os02g0579000
AT2G46830	Os01g0156000		AT2G21650	Os01g0192300		AT2G38470	Os11g0490900
AT1G67970	Os02g0232000		AT1G13260	Os01g0140700		AT1G56010	Os03g0109000
AT5G03720	Os02g0232000		AT1G66230	Os01g0975300		AT5G07580	Os03g0860100
AT1G66230	Os01g0127450		AT1G25560	Os01g0140700		AT1G03800	Os04g0610400
AT5G51190	Os01g0752500		AT3G62610	Os04g0517100		AT1G56010	Os08g0436700
AT1G27730	Os01g0838600		AT1G07050	Os03g0711100		AT2G38470	Os05g0565900
AT4G17460	Os10g0103700		AT4G21440	Os04g0517100		AT2G45160	Os10g0551200
AT3G58120	Os01g0211800		AT3G11580	Os01g0140700		AT2G38470	Os01g0584900
AT1G18330	Os01g0156000		AT2G37260	Os03g0657400		AT1G30490	Os12g0612700
AT5G47230	Os01g0752500		AT4G39780	Os02g0654700		AT1G06180	Os11g0684000
AT4G25490	Os04g0572400		AT1G13260	Os01g0141000		AT5G65410	Os02g0706600
AT3G24520	Os02g0232000		AT5G67450	Os03g0437200		AT3G54620	Os06g0662200
AT2G36270	Os01g0813100		AT1G69490	Os03g0133000		AT1G56010	Os06g0726300
AT2G47890	Os02g0110100		AT1G80840	Os06g0649000		AT2G01570	Os05g0500600
AT3G55980	Os01g0192000		AT5G56840	Os01g0192300		AT1G24625	Os09g0431900
AT1G18710	Os01g0127450		AT1G27730	Os03g0764100		AT1G54160	Os07g0158500
AT5G61600	Os01g0752500		AT1G75250	Os01g0192300		AT1G79430	Os02g0139000
AT2G23290	Os01g0210200		AT1G66230	Os04g0517100		AT2G38470	Os05g0474800
AT5G05790	Os01g0142500		AT1G80840	Os02g0181300		AT5G56960	Os01g0196300
AT2G43000	Os01g0104200		AT1G64380	Os02g0654700		AT5G23280	Os11g0175700
AT2G26150	Os01g0571300		AT1G27730	Os03g0437200		AT4G21750	Os04g0569100
AT5G48250	Os02g0110100		AT2G40750	Os07g0680400		AT1G56010	Os05g0442700
AT1G04990	Os01g0257400		AT2G21650	Os10g0562100		AT2G42200	Os06g0663500
AT2G22800	Os01g0643600		AT5G25390	Os02g0654700		AT5G47640	Os08g0174500
AT2G46270	Os01g0658900		AT2G38300	Os05g0488600		AT1G06040	Os04g0493000
AT4G39250	Os01g0142500		AT3G16770	Os09g0434500		AT5G07580	Os04g0546800
AT1G49560	Os01g0176700		AT3G16770	Os03g0183000		AT1G56010	Os02g0285900
AT5G28770	Os02g0175100		AT1G68840	Os01g0140700		AT1G56010	Os03g0815100
AT2G40750	Os01g0656400		AT2G40750	Os09g0334500		AT1G56010	Os07g0225300
AT1G01250	Os01g0200600		AT1G80840	Os01g0246700		AT4G36920	Os08g0442400
AT1G19510	Os01g0142500		AT2G46830	Os06g0728700		AT2G38470	Os05g0183100
AT3G16770	Os01g0131600		AT1G80840	Os01g0185900		AT2G25900	Os05g0525900
AT1G56650	Os01g0127450		AT2G21650	Os05g0579600		AT1G79430	Os05g0488600
AT5G61590	Os01g0752500		AT3G16770	Os09g0286600		AT1G03800	Os02g0638650
AT5G67190	Os01g0200600		AT3G16770	Os07g0617000		AT2G38470	Os05g0537100
AT3G11020	Os01g0165000		AT1G66230	Os02g0732600		AT2G42200	Os01g0292900
AT1G18570	Os01g0127450		AT2G40750	Os08g0386200		AT1G56010	Os07g0683200
AT4G06746	Os01g0200600		AT2G40750	Os05g0322900		AT4G38070	Os01g0218100
AT4G23810	Os01g0656400		AT3G16770	Os09g0287000		AT5G15740	Os08g0537900
AT4G09820	Os01g0575701		AT1G80840	Os09g0417600		AT1G56010	Os04g0515900
AT4G36570	Os01g0142500		AT1G66230	Os01g0695900		AT2G38470	Os09g0481700
AT2G28500	Os01g0169400		AT1G66230	Os02g0695200		AT2G38470	Os05g0343400
AT3G51910	Os01g0571300		AT1G27730	Os03g0820300		AT5G07580	Os02g0654700
AT4G25480	Os01g0200600		AT2G47890	Os09g0509700		AT3G46600	Os11g0705200
AT1G06160	Os01g0752500		AT2G46680	Os04g0541700		AT1G79430	Os06g0703900
AT5G24110	Os01g0656400		AT2G21650	Os05g0579700		AT1G56010	Os01g0816100
AT5G46830	Os01g0235700		AT2G23290	Os03g0720800		AT1G56010	Os05g0426200
AT1G47655			AT2G46270	Os05g0569300		AT1G75390	Os02g0132500
AT3G13960			AT4G01720	Os01g0185900		AT2G25900	Os12g0515500
AT4G36260			AT3G02380	Os08g0249000		AT4G38070	Os09g0410700
AT3G27650			AT1G66230	Os02g0624300		AT3G13810	Os01g0935000
AT4G38000			AT4G09820	Os04g0557800		AT1G06180	Os05g0553400
AT1G73830			AT1G49560	Os12g0586300		AT5G07580	Os09g0572000
AT5G59820			AT2G22800	Os02g0149900		AT2G38470	Os01g0826400
AT1G16640			AT1G66230	Os01g0305900		AT1G05805	Os02g0603600
AT2G37430			AT3G02380	Os02g0178100		AT1G32540	Os08g0159500
AT4G24150			AT3G16770	Os05g0361700		AT1G05805	Os04g0489600
AT1G62975			AT3G16770	Os03g0182800		AT3G46600	Os04g0590400
AT2G03710			AT2G46680	Os03g0198600		AT1G22490	Os10g0376900
AT2G24700			AT4G06746	Os04g0550200		AT2G38470	Os03g0657400
AT4G31620			AT1G27730	Os02g0823900		AT5G56960	Os01g0575200
AT5G56780			AT3G04420	Os03g0133000			Os10g0444100
AT1G26945			AT4G06746	Os06g0166400			Os03g0445700
AT2G28160			AT3G51910	Os08g0546800			Os07g0410300
AT2G29660			AT2G23290	Os02g0187700			Os09g0455300
AT3G05690			AT4G06746	Os09g0522200			Os01g0713600
AT1G46480			AT1G66230	Os07g0558100			Os09g0474000
AT4G20970			AT2G46680	Os08g0416000			Os12g0592300
AT3G26790			AT2G28500	Os03g0659700			Os03g0666300
AT3G06160			AT3G51910	Os01g0625300			Os02g0233200
AT3G54390			AT3G51910	Os07g0178600			Os08g0536800
AT2G22770			AT2G46680	Os02g0649300			Os08g0357300
AT2G31730			AT2G46680	Os09g0379600			Os09g0549450
			AT4G06746	Os02g0656600			Os06g0226500
			AT3G11020	Os05g0473300			Os03g0188400
							Os03g0164300
							Os01g0928000
							Os02g0564700
							Os06g0562300
							Os09g0309700
							Os05g0444200
							Os03g0113500
							Os02g0174300
							Os02g0806300
							Os12g0105600
							Os01g0867300
							Os03g0609500
							Os08g0504000
							Os10g0560700
							Os11g0707300
							Os07g0688200
							Os04g0540200
							Os01g0524500
							Os03g0821200
							Os03g0135700
							Os06g0284500
							Os02g0221100
							Os08g0562300
							Os06g0519400
							Os10g0490400
							Os05g0572000
							Os11g0603000
							Os03g0183200
							Os03g0764900
							Os01g0511000
							Os01g0298400
							Os08g0485700
							Os10g0536100
							Os10g0562900
