# Supplementary material for: Transcriptome-derived networks reconstruct distinct immune strategies under different iron availability between Arabidopsis and rice
Source: Research Square preprint supplement (doi:10.21203/rs.3.rs-3214423/v1), 2024-07-15
Supplement: Supplementary file 5 [file 768f3acace5bcaf3bcff2c85.xlsx]

## Sheet: Fe availability
	Mock-treated									Infected
Gene ID	-Fe #1	-Fe #2	-Fe #3	suf #1	suf #2	suf #3	+Fe #1	+Fe #2	+Fe #3	-Fe #1	-Fe #2	-Fe #3	suf #1	suf #2	suf #3	+Fe #1	+Fe #2	+Fe #3	P	adjusted P
AT2G32870	1770.05	2354.21	2353.26	1990.83	2199.94	2215.21	927.716	1279.35	1307.38	2323.45	2535.29	1771.36	1832.89	2262.28	1636.95	1266.14	1501.85	954.825	2.1495e-39	4.35102e-35
AT1G60960	672.046	580.063	467.972	1530.51	1480.87	1483.55	3486.14	4273.32	3703.8	719.795	580.38	479.404	2546.83	1838.74	1324.68	1779.29	3113.04	1992.11	4.80098e-39	4.85907e-35
AT1G19350	3154.98	1664.73	2221.32	3312.34	1657.67	1881.86	2937.77	1581.64	1893.58	2178.69	2941.77	3395.56	2024.98	2706.11	4426.73	2106.78	2522.38	4690.58	1.55082e-26	1.04639e-22
AT1G10970	376.302	752.668	398.91	1208.91	1479.68	1326.99	4191.05	6204.32	3743.5	576.64	517.247	166.121	2819.77	1593.57	649.083	1277.67	2583.48	722.629	7.5984e-23	3.84517e-19
AT5G50400	1064.9	1340.28	933.883	2067.4	2184.52	1841.39	4857.54	6107.69	4159	973.934	953.639	564.271	2931.82	1941.87	1348.25	1624.77	2821.46	1527.72	9.95515e-22	4.03024e-18
AT1G20380	190.91	221.65	259.756	331.505	417.68	392.986	1637.43	3602.67	1622.31	205.081	259.177	201.332	1008.49	367.747	300.483	337.868	929.411	336.359	7.00408e-20	2.36294e-16
AT1G05300	258.225	495.176	214.401	1171.98	1183.03	939.332	2892.63	2547.97	2561.83	799.414	389.873	290.712	2213.07	1376.3	817	1443.72	2578.12	845.237	3.64099e-18	1.05287e-14
AT4G14560	419.339	197.127	170.078	585.538	218.333	219.39	499.392	249.428	218.337	171.303	158.386	303.352	304.147	183.451	342.708	146.448	137.214	325.508	3.92591e-17	9.93354e-14
AT3G56240	4873.16	5448.82	5901.19	4242.9	5609.02	6033.24	3573.53	4535.96	4131.21	4510.98	4785.92	3577.03	4735.89	5044.48	4392.36	3589.71	3831.27	3090.16	4.70713e-17	1.05869e-13
AT2G39270	399.476	295.219	371.079	608.96	440.225	477.121	650.17	542.63	571.647	354.67	381.013	496.558	425.006	490.33	562.67	498.154	466.313	662.952	6.70478e-17	1.35718e-13
AT3G10420	2881.3	2718.28	2280.08	3937.52	2964.11	2811.61	4052.76	3747.21	3200.96	3668.94	3574.21	4552.99	3548.12	2981.71	4285.32	3696.95	3593.29	4467.06	2.96213e-16	5.45085e-13
AT1G20440	6798.81	4614.1	4159.18	9727.14	5043.01	3876.61	8039.25	6949.3	5004.56	2663.64	2852.06	6237.67	2712.51	3023.98	6682.32	3450.18	3558.99	6850.87	7.18389e-16	1.2118e-12
AT2G02010	24.2775	64.1371	49.4772	18.0166	40.3441	61.7701	166.144	186.658	162.761	246.097	283.544	119.174	155.275	106.52	84.4495	227.167	129.71	80.2921	1.38109e-15	2.15046e-12
AT4G30440	2980.62	1761.88	1795.61	3229.47	1787.01	2259.94	2704.4	1896.32	2207.19	2227.74	2230.7	4263.18	2028.18	2643.55	3975.02	2903.59	2512.73	4192.55	2.64111e-15	3.81867e-12
AT1G09240	132.423	74.5122	22.6771	397.265	123.406	109.695	697.228	891.169	350.663	43.4289	15.5063	157.093	127.262	111.592	94.2693	340.175	248.7	400.375	3.32049e-15	4.48089e-12
AT2G37170	3045.73	972.431	1127.67	2016.95	1396.62	1120.38	1549.07	1105.91	1005.68	1673.62	1524.05	3335.97	1359.86	1424.49	2168.19	2008.76	1505.07	3193.24	3.14619e-14	3.98033e-11
AT4G33020	4.4141	13.2047	2.06155	52.248	33.2246	33.0151	381.266	996.061	349.34	3.21696	2.21519	1.80567	159.277	33.8158	19.6394	25.3689	160.798	31.4658	3.71434e-14	4.42268e-11
AT5G10430	505.414	202.786	216.463	483.745	261.05	281.161	875.856	199.047	217.014	230.013	258.07	582.327	199.296	168.234	381.005	398.984	214.397	537.089	3.37017e-13	3.78994e-10
AT2G45960	20524.4	15600.4	14083.5	21303.7	16005.9	13782.2	18414.1	15941.1	14236.9	17976.4	18332.9	29052.3	17876.7	17742.3	24377.4	23121.5	18894.8	26338	3.79034e-13	4.03811e-10
AT4G33790	151.183	67.9099	126.785	218.901	87.8078	89.4602	151.738	79.2885	105.861	69.1646	101.899	253.696	70.4341	88.7666	308.339	84.1788	121.134	294.043	6.2433e-13	6.31884e-10
AT3G20820	3335.95	2309.88	2099.69	3863.65	2466.92	2160.89	2601.64	2211.82	1931.96	2121.58	2319.3	3344.09	2315.52	2447.42	3712.83	2839.02	2374.45	3239.89	7.1059e-13	6.84941e-10
AT4G24120	268.156	215.048	190.694	469.331	404.628	403.636	727.959	853.177	612.668	340.998	196.044	854.08	325.758	356.757	641.227	600.783	629.255	1242.36	3.26131e-11	3.0007e-08
AT1G72250	180.978	237.684	269.033	126.116	196.974	263.056	105.641	227.954	213.044	176.933	194.937	103.826	170.483	273.908	87.3955	124.538	166.158	80.2921	3.43814e-11	3.02586e-08
AT5G40390	1130.01	703.622	698.866	1117.93	930.288	745.502	1299.38	955.591	648.396	520.343	604.747	1091.53	673.126	589.241	911.27	664.205	531.704	980.865	3.73371e-11	3.14907e-08
AT1G09155	6.62115	15.0911	0	10.8099	35.5977	21.3	141.174	231.258	107.184	3.21696	0	0	86.4419	44.806	3.92789	29.9815	81.4708	13.0203	4.73906e-11	3.83712e-08
AT1G29395	5325.61	3418.13	4740.54	10124.4	6383.86	5130.12	8265.89	8744.03	6272.24	2433.63	1897.31	3382.92	3011.86	2740.77	4916.73	3324.49	3825.91	5224.41	5.69763e-11	4.43583e-08
AT5G57190	84.9714	165.059	143.278	71.1654	145.951	168.27	84.5124	161.055	149.528	119.027	151.741	66.8097	92.0446	97.2205	61.8642	106.088	120.062	41.2311	6.76966e-11	5.07524e-08
AT3G53420	18438.8	11363.6	12185.8	17740	13807.2	11724.6	13258.8	11466.3	10406.1	16067.1	14944.8	28512.4	15088.9	15275.5	23059.6	21170.4	14506.1	25742.3	7.64432e-11	5.5263e-08
AT4G00780	2928.75	4478.28	4536.44	2913.28	4179.18	4141.79	2289.52	3663.79	3751.44	3539.46	4052.69	3084.08	3443.27	3716.36	2722.02	2594.55	3430.35	2482.54	8.45692e-11	5.90293e-08
AT2G46530	478.93	409.346	425.71	895.423	715.515	496.291	984.378	701.207	603.405	622.482	383.228	931.724	645.913	692.379	1080.17	774.906	790.053	1063.33	1.05478e-10	7.11698e-08
AT4G01380	57.3833	174.491	146.37	34.2315	117.473	149.1	54.741	131.322	120.416	213.124	149.525	103.826	180.087	220.648	92.3053	139.529	161.87	80.2921	1.42547e-10	9.30789e-08
AT1G01430	1582.45	919.613	1222.5	1762.92	1223.38	1142.75	1435.75	970.458	1077.13	1659.95	1274.84	2489.11	1379.87	1530.17	2407.79	2067.57	1613.34	2721.25	1.70404e-10	1.06807e-07
AT5G45280	953.445	376.334	688.558	1042.26	659.745	693.317	1059.29	669.822	747.641	366.733	503.956	763.797	435.411	568.106	697.2	599.63	569.224	847.407	1.74124e-10	1.06807e-07
AT1G57770	770.26	915.84	1032.84	715.257	902.996	1065	564.697	884.562	1079.78	936.135	1007.91	708.724	948.459	925.709	595.075	932.885	876.884	511.048	2.58e-10	1.53601e-07
AT2G15970	9061.04	6182.63	7270.06	12884.5	8340.55	7064.16	9982.07	8583.8	6953.72	3712.37	3937.5	7860.07	3630.56	4768.88	7481.64	4905.43	4276.15	8206.07	3.05942e-10	1.72024e-07
AT4G35770	152.286	41.5005	26.8002	236.918	73.5687	68.1602	134.452	85.0699	47.6373	369.146	175	6665.62	230.512	371.974	3094.19	907.517	784.693	7167.69	2.98068e-10	1.72024e-07
AT1G65310	160.011	14.1479	37.1079	189.174	49.8368	8.52002	57.6221	21.474	30.4349	73.9901	39.8734	594.967	40.0194	108.211	437.959	197.186	109.342	493.688	4.25562e-10	2.32817e-07
AT1G64370	6844.06	12072.9	11309.7	6807.56	9955.5	10571.2	6505.54	10901.3	9441.44	11409.7	12853.6	8432.46	10212.9	11379	8473.43	7396.2	10955.7	6564.42	4.4627e-10	2.37721e-07
AT5G62220	1381.61	983.75	768.959	1686.35	977.751	997.907	1362.76	1052.22	1075.81	666.715	723.26	1509.54	801.988	754.093	1133.2	944.417	636.759	1745.81	5.46847e-10	2.83828e-07
AT3G20340	6.62115	0	2.06155	9.00828	0	4.26001	71.0673	75.9848	23.8186	1.60848	4.43038	19.8623	17.6085	10.1448	21.6034	27.6752	42.8794	61.8466	5.90192e-10	2.91382e-07
AT5G03760	3319.4	1882.61	2532.62	3357.39	2366.06	2272.72	3545.68	2167.22	2297.18	1760.48	2862.03	5278.87	2361.94	2418.68	4564.2	2104.47	1791.29	5237.43	5.7674e-10	2.91382e-07
AT1G62380	5440.37	2799.4	3167.57	4469.01	3184.81	3455.93	4265	2471.98	3698.5	6772.5	5968.83	11784.7	4894.37	6046.27	9955.23	8481.3	7805.12	10763.5	6.90392e-10	3.32736e-07
AT1G17620	832.057	420.664	565.896	839.572	562.444	634.741	816.313	456.735	633.84	447.157	557.12	1011.17	497.841	579.096	803.253	680.349	488.825	1164.23	7.69006e-10	3.62005e-07
AT5G15470	589.282	427.266	519.511	710.753	533.966	556.996	729.88	517.853	492.252	435.898	465.19	680.736	419.403	414.244	559.724	473.938	414.858	730.224	9.75678e-10	4.48856e-07
AT1G11545	634.526	178.263	256.663	483.745	321.566	358.906	407.196	212.262	314.935	336.976	315.665	1403	248.921	543.59	1013.39	582.333	484.537	1354.11	1.1601e-09	5.2184e-07
AT5G57560	381.819	49.9892	57.7235	295.472	66.4491	108.63	184.391	33.0369	117.77	172.912	37.6582	595.87	84.0407	221.494	910.288	314.806	232.621	839.812	1.36667e-09	6.01394e-07
AT3G41768	14610.7	14490.3	17315	14248.4	14763.6	12381.7	21563.2	27207.5	29120.9	11626.9	10892.1	14062.5	8737.83	8474.25	9791.24	23610.4	20081.5	12105.7	1.41265e-09	6.08402e-07
AT4G30280	34.2093	1.88638	2.06155	39.6364	0	0	36.494	0	2.64652	4.82544	8.86076	52.3643	3.20155	5.07238	17.6755	9.22507	4.28794	60.7616	1.50565e-09	6.34944e-07
AT5G48300	7984	8343.48	10924.2	8303.83	9855.83	11035.6	8891.09	10213.3	11083.6	7555.83	8738.93	6110.38	8580.95	8409.15	6473.16	7008.75	7774.03	6288.82	1.74868e-09	7.22382e-07
AT4G19840	2268.85	4195.32	4108.67	2080.01	3130.23	3718.99	1938.02	3674.52	3313.44	3446.17	3720.41	2288.68	3333.61	3380.74	2804.51	2006.45	2703.55	1980.18	2.16697e-09	8.77276e-07
AT4G16370	3288.5	8061.47	7239.14	2194.42	3111.24	4759.5	3012.68	1895.49	3854.65	7086.96	12461.6	2296.81	8592.96	5893.26	3088.3	2440.03	2475.21	1761	2.57449e-09	1.02182e-06
AT1G32450	828.747	296.162	256.663	429.695	302.581	232.171	309.239	308.895	248.772	377.993	362.184	1148.4	289.74	426.08	1018.3	473.938	447.018	921.189	2.6399e-09	1.02763e-06
AT3G52800	742.672	942.249	657.635	989.109	919.608	808.337	1601.89	1712.96	1172.41	968.305	890.506	692.473	1217.39	1023.77	1167.56	955.948	1082.7	1009.08	2.7378e-09	1.04563e-06
AT2G37130	334.368	198.07	134.001	369.339	220.706	193.83	311.159	229.606	158.791	536.428	259.177	913.667	254.523	437.07	772.812	921.354	603.527	1151.21	2.8004e-09	1.04973e-06
AT3G16570	1528.38	1234.64	1324.55	1824.18	1124.89	1246.05	1802.61	1158.77	1292.82	1219.23	1400	2194.79	1177.37	1301.06	1977.69	1752.76	1262.8	2298.09	2.92103e-09	1.07505e-06
AT3G11900	400.579	281.071	296.863	445.009	390.389	417.481	553.172	450.953	408.887	404.533	416.456	656.36	400.194	421.853	625.516	518.91	496.329	643.422	3.24053e-09	1.17133e-06
AT1G74770	289.123	191.468	127.816	34.2315	37.9709	68.1602	5.76221	14.0407	56.9001	213.124	454.114	30.6963	247.32	117.51	35.351	14.9907	15.0078	13.0203	3.41915e-09	1.20112e-06
AT4G01390	412.718	1235.58	1120.45	298.174	923.168	898.862	452.334	753.24	869.38	2047.59	1387.82	1039.16	1754.45	1744.05	1240.23	1436.81	1620.84	892.978	3.44161e-09	1.20112e-06
AT1G08510	3153.87	2180.66	2330.58	3746.54	2264.02	2603.93	3512.07	2283.67	2606.82	2771.41	2556.33	3845.17	2499.61	2885.34	3329.87	3228.78	3224.53	3597.95	3.88734e-09	1.33369e-06
AT1G07720	1077.04	971.488	848.329	1386.37	1200.83	1085.24	1762.28	1272.74	1136.68	1027.01	1116.46	1353.35	1179.77	974.742	1142.03	1194.65	1054.83	1464.79	4.00367e-09	1.35071e-06
AT4G01950	911.511	514.04	477.249	1179.18	608.721	679.472	852.807	498.031	774.106	480.935	449.684	1199.87	495.44	600.231	794.415	739.159	556.36	1133.85	4.18591e-09	1.38904e-06
AT2G03445	2.20705	7.54554	0	22.5207	22.5452	10.65	80.671	124.714	112.477	4.82544	2.21519	1.80567	54.4264	22.8257	3.92789	10.3782	49.3113	10.8503	4.49619e-09	1.43437e-06
AT4G00360	5132.49	3330.41	4147.84	6616.58	4475.82	4772.28	7410.2	4015.63	4946.34	6473.33	5806.01	9815.6	5268.95	5814.63	8502.89	8489.37	5389.94	10289.3	4.5031e-09	1.43437e-06
AT5G07110	172.15	97.1488	129.878	174.761	119.846	124.605	223.766	118.933	121.74	104.551	134.019	341.271	105.651	113.283	195.412	174.123	151.15	271.257	4.5351e-09	1.43437e-06
AT4G15910	314.504	645.144	374.172	230.612	390.389	334.411	244.894	396.442	310.966	255.748	287.975	134.522	327.359	295.043	198.358	284.824	250.844	93.3124	6.93329e-09	2.15913e-06
AT3G22370	760.328	786.623	754.528	1272.87	1091.66	946.787	1251.36	1429.67	1188.29	1088.14	910.443	1180	988.479	924.863	1170.51	938.651	1003.38	1236.93	7.6065e-09	2.33289e-06
AT3G10340	269.26	127.331	131.939	173.86	130.525	108.63	232.409	154.447	92.628	81.2282	131.804	272.656	76.8372	100.602	162.025	83.0257	85.7588	199.645	8.48047e-09	2.45231e-06
AT4G32460	468.998	196.184	249.448	442.306	293.088	213	286.19	205.654	269.945	218.753	286.867	1169.17	236.114	278.981	964.296	402.444	400.922	1062.24	8.47375e-09	2.45231e-06
AT5G13180	1509.62	1291.23	1057.58	1615.18	1194.9	1219.43	1555.8	1085.26	1157.85	1620.54	1728.96	2560.43	1788.87	1628.23	2080.8	1866.92	2004.61	2456.5	8.4274e-09	2.45231e-06
AT5G49720	7005.17	5125.31	6193.93	7501.19	5766.83	6153.58	7841.41	5527.89	6469.41	7093.39	6871.52	9059.03	6684.84	7109.78	9259.99	7784.81	6786.74	9367.05	8.14986e-09	2.45231e-06
AT5G20490	2328.44	1778.86	1950.23	2332.24	2026.7	1890.38	2229.02	1935.13	1926.66	2423.98	2113.29	2845.73	1871.31	1913.98	2457.87	2238.23	1991.75	2715.82	8.80654e-09	2.51073e-06
AT1G13609	174.357	8631.15	3171.7	12.6116	55.7698	912.707	19.2074	6.60737	529.303	2153.75	9178.64	0.902833	3848.26	840.324	149.26	8.07194	6.43191	0	9.04571e-09	2.5431e-06
AT3G05890	86.0749	18.8638	16.4924	108.099	62.8894	35.1451	66.2654	26.4295	26.4652	27.3442	24.3671	84.8663	20.8101	25.3619	45.1707	48.4316	17.1518	65.1017	9.258e-09	2.56713e-06
AT1G23020	789.02	2875.79	2202.77	609.86	795.016	1183.22	590.627	358.45	849.531	3442.15	4826.9	1225.14	2971.84	1828.59	1402.26	1635.14	1730.18	1167.49	1.03753e-08	2.81017e-06
AT3G23170	183.185	33.0117	49.4772	263.943	116.286	108.63	222.806	200.699	156.144	59.5137	42.0886	190.498	57.6279	125.964	214.07	152.214	123.278	258.237	1.04122e-08	2.81017e-06
AT1G76180	11973.2	9032.95	7880.28	13246.7	9720.56	8217.56	13747.7	11908.1	8339.17	7123.96	8087.66	8923.6	7413.19	7159.66	10398.1	7598	6862.85	10143.9	1.13007e-08	3.00984e-06
AT2G39850	3125.18	3946.32	4207.63	2349.36	3877.78	3605.03	2108.01	3690.22	3427.24	2875.16	3810.13	2463.83	2793.35	3282.67	2459.84	1559.04	2518.09	1679.62	1.52679e-08	4.01367e-06
AT1G26920	1112.35	897.919	827.713	1420.61	1160.49	900.992	1038.16	978.717	799.248	977.956	806.329	1321.75	984.477	1088.87	1319.77	1044.74	999.09	1341.09	1.5855e-08	4.11458e-06
AT5G10450	6034.07	5043.25	4957	6476.95	5482.05	5020.42	6262.56	5659.21	5143.5	7042.73	6494.94	8407.18	6534.36	6554.36	7631.88	8573.55	7620.74	8459.96	1.71548e-08	4.39554e-06
AT1G47400	59.5903	1226.15	499.926	12.6116	35.5977	176.79	21.1281	11.5629	186.579	328.13	1587.18	5.417	838.806	175.842	35.351	13.8376	4.28794	0	2.22132e-08	5.55112e-06
AT2G37640	1316.5	777.191	624.65	1255.75	988.431	775.322	940.201	816.01	717.206	981.173	1127.53	1663.02	1137.35	1276.55	1897.17	1104.7	1212.41	1585.23	2.19484e-08	5.55112e-06
AT2G47890	649.976	678.155	750.405	832.365	781.964	813.662	1094.82	1258.7	1123.45	443.94	429.747	378.287	551.467	483.567	456.617	437.038	590.664	505.623	2.42065e-08	5.97547e-06
AT1G52750	108.145	49.046	65.9697	72.9671	18.9855	31.9501	43.2166	31.385	31.7582	61.1222	60.9177	231.125	64.031	72.7041	155.151	138.376	88.9747	188.795	2.45194e-08	5.97979e-06
AT3G47640	186.496	473.483	406.126	110.802	163.75	214.065	180.549	118.933	179.963	467.263	830.696	103.826	590.686	431.152	178.719	131.457	81.4708	78.122	2.53461e-08	6.07521e-06
AT3G62260	130.216	73.569	89.6775	165.752	142.391	127.8	215.123	246.125	177.317	104.551	81.962	191.401	131.264	118.355	176.755	156.826	166.158	237.621	2.5511e-08	6.07521e-06
AT1G64640	808.883	340.492	431.895	601.753	437.852	500.551	497.471	335.324	508.131	485.761	496.203	1251.33	427.407	527.527	915.197	601.936	526.345	1120.83	3.75922e-08	8.67222e-06
AT4G33220	2015.04	1283.68	1411.13	2154.78	1584.1	1669.92	2248.22	1322.3	1599.82	2464.19	2174.21	4462.7	2175.45	2493.92	3670.61	4078.64	2815.03	4295.63	3.77016e-08	8.67222e-06
AT4G36250	2901.17	2214.62	2557.36	3316.85	2551.17	2543.23	3733.91	2382.78	2506.25	2728.79	3198.73	4506.94	3259.18	2722.18	3989.75	3336.02	2753.93	4960.75	3.75169e-08	8.67222e-06
AT4G08950	435.892	185.809	249.448	474.736	224.266	264.121	194.955	99.1106	268.621	262.986	180.538	831.509	206.5	262.073	674.614	287.13	289.436	921.189	4.21188e-08	9.57942e-06
AT2G39010	8513.69	4881.96	5689.88	10093.8	7354.49	6159.97	7476.47	6988.95	6509.1	5242.03	5304.27	10043.1	5246.54	6578.87	8684.56	7460.78	6193.93	10166.7	4.53401e-08	1.01975e-05
AT1G12080	496.586	69.7962	171.109	325.199	125.779	148.035	419.681	116.455	152.175	176.129	137.342	573.299	100.849	199.513	402.608	586.945	173.662	667.292	5.0574e-08	1.12497e-05
AT1G47395	71.7291	1493.07	510.234	10.8099	46.2771	177.855	19.2074	16.5184	150.851	431.073	1735.6	3.61133	788.382	218.112	39.2789	2.30627	10.7198	4.34011	5.17521e-08	1.13866e-05
AT1G15960	331.057	501.778	566.927	304.48	497.182	453.691	182.47	331.194	406.24	474.501	408.703	282.587	356.973	325.477	299.501	284.824	339.819	249.556	5.24599e-08	1.14182e-05
AT4G36850	86.0749	244.287	93.8006	83.777	90.181	107.565	252.577	770.585	379.775	225.187	232.595	152.579	417.002	257.846	215.052	163.745	578.872	274.512	5.61489e-08	1.20911e-05
AT1G07890	10082.9	5341.3	6485.64	9131.69	9539.01	9262.33	14107.8	16550.6	11511	10151.9	8427.69	18008.8	9335.72	10059.4	14169.8	13419	12492.9	21949	6.06514e-08	1.29232e-05
AT4G16515	211.877	86.7737	123.693	167.554	138.831	82.0052	131.571	61.1182	80.7187	83.6409	112.975	197.72	88.843	100.602	184.611	126.845	99.6946	189.88	6.97143e-08	1.46996e-05
AT5G51670	145.665	98.092	63.9081	105.397	62.8894	70.2902	90.2747	44.5998	66.1629	94.9003	98.576	204.04	78.438	69.3225	155.151	121.079	85.7588	152.989	7.99001e-08	1.66736e-05
AT4G21380	588.178	617.791	1096.75	626.976	1542.57	1789.2	1068.89	1132.34	1577.32	764.832	770.886	185.984	524.254	670.399	262.186	629.611	607.815	298.383	8.08148e-08	1.66924e-05
AT5G12250	6868.33	4101.94	5208.51	6082.39	5122.52	4903.27	5506.75	4591.3	4685.66	4685.5	4934.34	6891.33	4721.49	5370.8	6724.54	5401.28	5179.83	6657.73	8.50825e-08	1.73964e-05
AT5G47370	708.463	430.096	349.433	937.762	463.957	400.441	933.478	434.435	424.766	473.697	455.222	438.777	582.682	482.721	802.271	404.75	354.827	633.656	8.74156e-08	1.76947e-05
AT5G24570	167.736	90.5465	94.8314	246.827	93.7407	191.7	146.936	78.4625	119.093	193.822	112.975	435.166	112.054	157.244	266.114	200.645	190.813	376.505	9.05876e-08	1.81552e-05
AT3G22400	205.256	194.298	173.17	135.124	161.376	158.685	95.0765	96.6328	83.3652	172.107	176.108	192.303	152.074	148.79	145.332	139.529	118.99	163.839	9.65614e-08	1.91627e-05
AT3G16770	1509.62	1271.42	748.343	2271.89	1177.1	822.182	1535.63	1148.86	1100.95	2247.85	2271.68	6596.1	1597.57	2566.62	6037.16	4549.11	5367.43	6979.98	1.06126e-07	2.08563e-05
AT4G01430	92.696	14.1479	4.1231	14.4132	7.11955	2.13	69.1465	18.1703	5.29303	6.43392	6.64557	29.7935	11.2054	8.45396	12.7656	13.8376	8.57588	28.2107	1.2285e-07	2.39109e-05
AT4G22753	232.844	309.367	243.263	185.571	225.452	227.911	148.857	264.295	228.924	287.918	294.62	178.761	248.921	232.484	203.268	164.898	165.086	131.288	1.35591e-07	2.61394e-05
AT5G20480	98.2137	200.9	240.171	113.504	218.333	293.941	199.757	197.395	326.845	280.68	299.051	139.036	248.921	205.431	145.332	294.049	296.94	101.993	1.39171e-07	2.65764e-05
AT4G35320	615.767	340.492	505.08	749.489	440.225	437.716	593.508	401.398	428.735	226.796	291.298	861.303	305.748	313.642	501.787	383.994	291.58	844.152	1.42222e-07	2.69052e-05
AT5G04060	520.863	343.322	311.294	542.298	475.823	379.141	549.331	423.698	488.282	318.479	271.361	501.072	369.779	402.408	485.094	494.695	414.858	613.041	1.46299e-07	2.74202e-05
AT1G79560	1624.39	1791.12	1775	1403.49	1873.63	1713.59	1251.36	1790.6	1639.52	1629.39	1629.27	1115	1693.62	1810.84	1302.09	1437.96	1662.65	1104.56	1.5391e-07	2.8582e-05
AT5G04150	17.6564	204.673	78.339	9.00828	21.3586	18.105	9.60369	4.95553	13.2326	345.823	709.968	14.4453	368.178	151.326	64.8101	9.22507	38.5915	8.68022	2.07138e-07	3.77737e-05
AT5G52810	270.363	256.548	466.941	227.009	407.001	648.586	359.178	439.39	582.233	280.68	334.494	135.425	260.926	295.043	89.3594	229.474	270.14	168.179	2.06547e-07	3.77737e-05
AT4G24805	227.326	164.115	185.54	256.736	167.309	178.92	229.528	160.229	157.468	255.748	190.506	356.619	168.882	196.132	288.7	265.221	242.269	339.614	2.2105e-07	3.99508e-05
AT1G35140	50.7621	0	16.4924	18.0166	2.37318	9.58502	19.2074	4.95553	2.64652	6.43392	2.21519	75.838	6.4031	11.8355	76.5938	11.5313	6.43191	71.6118	2.38721e-07	4.27627e-05
AT5G05250	535.209	2165.57	2032.69	293.67	524.473	991.517	428.324	179.225	620.608	1877.1	3523.26	158.899	2427.58	1424.49	380.023	177.583	273.356	86.8022	2.45564e-07	4.36027e-05
AT2G05710	7459.82	5048.91	6348.55	7987.64	7728.27	8016.27	10434.4	9641.81	8912.14	8196.81	6502.69	9555.59	7943.05	8857.21	9978.79	8926.41	9800.08	11045.6	2.48214e-07	4.369e-05
AT4G12730	2996.07	953.568	1839.94	2434.04	1811.93	1994.75	2102.25	995.235	1736.11	2002.56	1734.49	6302.68	1672.81	2328.22	4056.52	3385.6	2217.94	5931.85	2.71236e-07	4.73306e-05
AT4G04745	66.2115	5.65915	6.18466	52.248	7.11955	4.26001	5.76221	1.65184	5.29303	25.7357	6.64557	39.7247	14.407	8.45396	25.5313	27.6752	10.7198	56.4214	2.86214e-07	4.95175e-05
AT5G59050	513.139	540.449	378.295	562.117	424.8	432.391	715.475	431.131	490.929	632.937	459.652	957.003	721.149	616.294	1246.12	592.711	553.144	1091.54	3.00494e-07	5.15475e-05
AT3G51740	614.663	651.746	617.435	399.067	588.549	565.516	361.099	507.942	526.657	413.379	421.994	278.975	391.39	454.823	242.547	360.931	347.323	218.091	3.21652e-07	5.47132e-05
AT5G57090	37.5198	3.77277	1.03078	17.1157	7.11955	0	0	0	0	3.21696	2.21519	28.8907	1.60078	2.53619	3.92789	2.30627	0	6.51017	3.3146e-07	5.59117e-05
AT4G17340	3713.36	842.271	1551.32	2770.95	1552.06	1486.74	2179.08	1360.29	1230.63	1612.5	1565.03	3277.28	1428.69	1733.06	2411.72	3061.57	1947.8	3316.93	3.38305e-07	5.65948e-05
AT1G23030	779.088	305.594	407.156	641.389	323.939	444.106	472.501	220.521	449.908	663.498	571.519	1283.83	459.422	627.284	933.855	953.642	675.35	1176.17	3.48974e-07	5.7901e-05
AT3G07700	1272.36	1160.13	1269.92	1710.67	1346.78	1308.89	1856.39	1747.65	1615.7	1632.61	1510.76	1705.45	1570.36	1432.95	1893.24	1401.06	1445.04	1884.69	4.03742e-07	6.64435e-05
AT2G30520	5062.97	3895.38	3798.41	4814.02	3830.32	3646.57	3885.65	2930.37	3485.46	7445.65	6438.45	9243.21	5281.76	6086.85	8529.4	7444.63	5871.26	8072.61	4.22506e-07	6.87301e-05
AT5G14920	2559.07	1245.96	1743.04	2588.08	1604.27	1566.62	1730.58	1162.9	1515.13	1861.01	1645.89	3094.91	1196.58	2290.18	3458.5	2702.95	2508.44	3293.06	4.24428e-07	6.87301e-05
AT1G66180	667.632	395.198	486.526	836.869	339.365	489.901	717.395	296.506	393.007	693.255	573.734	918.181	542.663	841.169	1271.65	979.011	782.549	1115.41	4.4516e-07	7.09521e-05
AT2G44500	334.368	129.217	159.77	264.843	129.338	177.855	321.724	120.585	178.64	320.892	249.209	394.538	157.676	269.681	477.238	364.39	271.212	513.218	4.44503e-07	7.09521e-05
AT2G17840	1985.24	1779.8	1459.58	2839.41	1823.79	1798.79	2742.81	2957.62	1939.9	893.51	1062.18	1501.41	1068.52	999.258	1355.12	1116.23	1019.46	1814.17	4.59789e-07	7.27113e-05
AT4G37470	1678.46	1426.11	1388.46	2180.9	1686.15	1298.24	2232.86	1777.38	1478.08	1549.77	1509.65	1789.42	1519.14	1522.56	1949.21	1706.64	1572.6	1903.14	4.85542e-07	7.61886e-05
AT3G54690	733.844	492.346	526.726	647.695	525.66	523.981	685.703	460.038	497.545	563.772	542.722	1096.04	533.058	572.333	738.443	794.509	653.911	914.678	5.19306e-07	8.08599e-05
AT2G38530	1234.84	1826.96	1893.54	1094.51	1625.63	1827.54	623.279	1675.79	1429.12	1244.16	2329.27	731.295	2000.97	2448.27	1781.3	1041.28	1612.27	1024.27	5.50513e-07	8.50648e-05
AT1G19940	140.148	45.2732	87.616	149.537	92.5541	89.4602	148.857	67.7256	116.447	40.212	43.1962	142.648	33.6163	37.1974	90.3414	89.9445	55.7432	133.458	5.69826e-07	8.73819e-05
AT4G21820	73.9361	107.524	113.385	81.0745	128.152	132.06	41.2959	79.2885	101.891	82.0325	96.3608	64.1012	71.2345	106.52	47.1346	50.7379	83.6148	45.5712	5.81576e-07	8.85133e-05
AT3G05880	1733.64	1117.68	1215.28	2316.03	1244.73	1017.08	1448.24	1301.65	891.876	287.114	458.544	1082.5	364.977	433.688	793.433	599.63	412.714	882.128	6.05651e-07	9.14894e-05
AT5G19190	930.271	407.459	522.603	1108.02	472.263	479.251	537.806	310.546	426.089	1022.99	686.709	1652.18	709.944	1063.51	2548.22	1541.74	1040.9	1449.6	6.71147e-07	0.000100632
AT1G72140	143.458	35.8413	30.9233	75.6695	41.5307	27.6901	55.7014	39.6442	18.5256	65.9477	63.1329	144.453	51.2248	59.1777	110.963	99.1695	58.9592	105.248	7.16307e-07	0.000105836
AT3G43720	1691.7	1054.49	1077.16	1745.8	1390.69	1393.02	1708.5	1165.38	1188.29	1232.1	1157.44	2433.14	1192.58	1372.92	1783.26	2223.24	1494.35	2230.82	7.15796e-07	0.000105836
AT5G60920	3947.31	2567.37	3646.89	4298.75	3367.55	3755.2	4097.89	2927.07	3429.88	3257.98	3537.66	5824.18	3183.94	3602.23	4970.74	4037.12	3325.3	6113.05	7.22527e-07	0.000105981
AT1G61890	827.643	647.973	794.728	1073.79	665.678	858.392	1246.56	641.741	951.422	498.629	707.753	1040.06	612.296	578.251	710.947	638.836	630.327	1039.46	7.51927e-07	0.0001095
AT1G49240	4188.98	2904.09	2850.1	3909.59	3097	2792.44	4119.98	2875.03	3174.49	3976.97	3661.71	4731.75	3371.23	3833.87	4476.81	5139.52	3939.54	5324.23	8.08184e-07	0.000116852
AT1G04240	855.231	642.314	560.742	972.894	669.238	549.541	743.325	607.878	616.638	501.041	578.165	1486.06	564.273	561.343	1005.54	883.301	492.041	1435.49	8.40439e-07	0.000120533
AT2G06850	4608.32	1314.81	2211.01	4268.12	2264.02	2411.17	2412.45	1162.07	2195.28	3710.76	2378.01	10683.2	2129.03	4137.37	9094.04	7717.93	4618.11	9146.78	8.45556e-07	0.000120533
AT2G45970	929.167	705.508	627.743	944.068	720.261	673.082	731.801	606.226	599.436	710.144	678.956	1319.94	807.591	737.185	943.675	1070.11	737.526	1220.66	8.93671e-07	0.000124756
AT4G30110	1019.66	827.18	755.559	896.324	1251.85	931.877	1404.06	2449.68	2326.29	648.217	815.19	955.198	1738.44	1045.75	1313.88	1083.95	1777.35	1910.73	8.87392e-07	0.000124756
AT5G61270	806.676	779.077	735.974	907.134	605.162	685.862	945.963	764.803	682.801	890.293	791.93	1180.91	751.564	719.432	1104.72	796.816	853.3	1190.28	8.90724e-07	0.000124756
AT4G22990	891.648	747.952	769.99	1277.37	1142.69	928.682	1575.97	1942.57	1282.24	531.602	471.836	510.101	777.977	690.689	586.237	633.071	820.068	595.68	9.42969e-07	0.000130737
AT1G21250	2415.61	3176.67	4841.55	2212.43	5766.83	8724.5	5936.04	5254.51	8573.39	5201.82	5034.02	923.598	4156.41	4319.97	1991.44	4039.43	4210.76	1922.67	9.63331e-07	0.000132651
AT1G20450	6561.56	4248.14	5010.6	9282.13	6334.03	4645.54	7642.61	8546.63	5169.97	1744.4	2092.25	5064.89	2301.91	2529.42	4729.17	2219.78	2276.9	5996.95	9.8417e-07	0.000133702
AT2G44790	252.707	39.6141	44.3234	81.0745	47.4637	19.17	95.0765	42.122	50.2838	57.9053	35.443	137.231	19.2093	57.4869	51.0625	198.339	90.0467	209.41	9.7763e-07	0.000133702
AT3G23430	644.458	422.55	246.355	203.587	231.385	197.025	277.547	249.428	226.277	218.753	225.949	427.943	216.105	249.392	360.384	212.177	183.309	453.542	9.92974e-07	0.000133999
AT3G15480	1163.11	909.238	999.853	1136.84	993.177	1051.16	1076.57	874.651	915.694	963.479	871.677	1266.67	940.455	1000.95	1225.5	1067.8	1036.61	1354.11	1.02389e-06	0.000137255
AT4G38400	240.568	85.8305	130.909	178.364	169.683	152.295	80.671	57.8145	93.9513	105.355	88.6076	340.368	71.2345	108.211	248.439	136.07	126.494	342.869	1.04579e-06	0.00013927
AT3G02350	1337.47	1018.65	1274.04	1460.24	1092.85	1214.1	1610.54	1040.66	1302.09	1145.24	1352.37	2099.99	1223.79	1181.86	1699.79	1319.19	1127.73	2095.19	1.06291e-06	0.000140624
AT1G53910	1868.27	1449.69	1366.81	2122.35	1827.35	1732.76	2315.45	2550.45	2355.4	1776.57	1190.66	2165.9	1475.11	1851.42	2076.87	2436.57	2458.06	2667	1.12768e-06	0.000148224
AT5G13580	64.0044	16.9775	14.4309	58.5538	11.8659	6.39001	22.0885	39.6442	10.5861	3.21696	8.86076	54.17	0	0	3.92789	6.9188	0	10.8503	1.22253e-06	0.000159655
AT3G11660	941.306	841.328	821.528	1308	1039.45	1041.57	1507.78	904.384	940.836	1285.98	1129.75	1403	1017.29	1071.96	1568.21	1279.98	1063.41	1486.49	1.33873e-06	0.000173708
AT4G14750	278.088	173.547	151.524	239.62	163.75	168.27	211.281	114.803	183.933	230.013	264.715	397.247	249.721	268.836	387.879	273.293	203.677	386.27	1.35701e-06	0.000174959
AT1G22710	5083.94	7069.23	7282.43	5465.32	7087.51	6951.27	4777.83	7628.21	6833.3	6324.54	6307.75	4968.29	6051.73	6118.98	4738.99	4611.38	6765.3	4030.88	1.48303e-06	0.000189996
AT1G77690	390.648	172.604	178.324	187.372	161.376	152.295	250.656	169.314	213.044	218.753	208.228	483.919	214.504	247.701	410.464	295.202	284.076	377.59	1.54297e-06	0.000195205
AT4G14020	380.716	1034.68	973.052	408.075	562.444	992.582	469.62	758.196	981.857	649.826	755.38	361.133	836.405	684.771	525.355	424.353	642.119	437.266	1.53752e-06	0.000195205
AT4G24220	3134.01	2851.27	3109.85	3952.83	3150.4	3134.3	3893.33	3626.62	3600.58	2854.25	2865.35	3222.21	2890.2	2834.61	3307.28	2963.55	3009.06	3617.48	1.61115e-06	0.000202564
AT2G30766	124.698	1023.36	688.558	37.8348	105.607	257.731	51.8599	11.5629	189.226	433.485	1055.54	11.7368	778.777	261.227	77.5757	42.666	42.8794	1.08503	1.63614e-06	0.000204436
AT1G18370	353.128	352.754	427.772	238.719	352.418	355.711	135.412	280.813	304.349	221.97	284.652	193.206	246.519	282.362	117.837	156.826	259.42	81.3771	1.87243e-06	0.000231133
AT2G36145	1141.04	1325.19	2025.47	1099.01	1340.85	1588.98	1015.11	1656.8	1515.13	858.124	1247.15	769.214	1235.8	962.061	666.759	863.697	824.356	480.667	1.87263e-06	0.000231133
AT1G62480	1877.09	1090.33	566.927	1285.48	882.824	715.682	1018.95	565.756	700.003	1211.19	1179.59	5009.82	671.525	1611.32	3620.53	2961.25	1352.84	4098.15	1.95608e-06	0.000239969
AT2G31570	1403.68	1115.8	1231.78	1550.32	1122.52	1209.84	1500.1	1062.13	1257.09	1236.92	1159.65	1751.5	1177.37	1230.05	1553.48	1484.08	1363.56	1612.35	1.96951e-06	0.000240162
AT5G07990	193.117	837.555	420.557	61.2563	177.989	248.146	92.1954	288.247	260.682	68.3604	107.437	63.1983	145.671	65.9409	70.7019	62.2692	52.5273	53.1664	2.10536e-06	0.00025519
AT2G37280	125.802	63.1939	38.1387	20.719	26.105	21.3	36.494	33.0369	25.1419	24.1272	35.443	70.421	35.2171	28.7435	71.6839	39.2066	26.7996	48.8263	2.16447e-06	0.000260793
AT1G01120	1614.46	554.597	797.821	1871.92	969.445	1118.25	1442.47	768.933	1241.22	1143.63	882.753	4355.27	1078.92	1133.68	1679.17	2433.11	1023.75	3460.15	2.19515e-06	0.000262034
AT3G12610	2248.98	1154.47	1212.19	2051.19	1378.82	1345.1	1519.3	984.498	1566.74	1363.19	1704.59	2758.16	1462.31	1786.32	2659.18	2314.34	1797.72	2675.68	2.20066e-06	0.000262034
AT3G27020	1261.33	1089.39	1043.15	1550.32	1234.06	977.672	1583.65	1216.58	1175.05	1320.56	1206.17	1622.39	1363.86	1192.85	1441.53	1491	1515.79	1662.26	2.27241e-06	0.000268995
AT2G14900	300.159	182.979	175.232	247.728	164.936	193.83	225.687	161.881	168.054	168.89	276.899	452.319	233.713	238.402	462.509	262.915	184.381	367.824	2.58358e-06	0.000304051
AT1G07590	1664.11	2731.49	1776.03	1067.48	1272.03	1198.13	1375.25	1792.25	1523.07	999.67	1280.38	961.517	1237.4	1019.55	1014.38	809.5	971.218	824.621	2.60517e-06	0.00030482
AT1G75680	3566.59	2251.4	2902.66	3304.24	2862.06	2831.84	3655.16	2621.47	2751.05	2198.79	2456.65	3749.47	2426.78	2598.75	3056.88	2714.48	2320.85	3623.99	2.68382e-06	0.000312217
AT5G67140	224.015	257.492	157.709	248.628	246.811	281.161	525.322	570.712	451.231	188.192	302.373	197.72	356.172	251.928	266.114	209.87	276.572	276.682	2.82451e-06	0.000326708
AT4G17030	569.419	1343.11	1258.58	428.794	869.772	847.742	322.684	1027.45	793.955	604.788	715.506	534.477	781.178	650.955	554.814	255.996	453.45	311.403	2.84082e-06	0.000326726
AT1G20070	473.412	296.162	188.632	317.091	199.347	158.685	214.162	136.277	145.558	61.9265	109.652	264.53	88.843	99.7567	109.981	88.7913	68.607	109.588	2.92615e-06	0.00033464
AT3G53480	711.773	32.0685	25.7694	251.331	83.0614	25.5601	171.906	66.8996	27.7884	19.3018	22.1519	110.146	17.6085	27.0527	33.387	64.5755	30.0156	60.7616	3.01733e-06	0.000343128
AT1G77270	123.595	178.263	204.094	139.628	202.907	174.66	105.641	173.443	148.205	190.605	260.285	128.202	191.293	197.823	144.35	156.826	195.101	98.7375	3.2414e-06	0.00036655
AT1G67900	2425.55	1529.86	1658.52	2899.76	1661.23	1581.53	2234.78	1513.09	1701.71	1848.14	1752.22	2271.53	1780.86	1497.2	2319.42	1916.51	1588.68	1936.77	3.37527e-06	0.000379568
AT1G30410	812.194	1071.47	1127.67	797.233	874.518	1184.28	1010.31	1246.32	1152.56	1136.39	1138.61	795.396	1017.29	946.844	735.497	966.326	1030.18	835.471	3.60626e-06	0.000403304
AT4G12520	8.82819	0	0	19.8182	0	0	3.84147	3.30369	2.64652	3.21696	0	70.421	4.00194	1.69079	60.8822	2.30627	3.21595	17.3604	3.78495e-06	0.000420962
AT4G33520	1359.54	1500.62	1504.93	1244.94	1406.11	1482.48	1146.68	1513.91	1409.27	1384.9	1473.1	1160.14	1374.27	1329.81	1056.6	1331.87	1281.02	1089.37	3.85807e-06	0.000426749
AT2G46430	665.425	871.51	1039.02	590.042	1563.93	1777.49	1436.71	1205.02	1808.89	1587.57	1322.47	365.647	1321.44	1419.42	608.822	1237.31	1320.69	543.599	3.90257e-06	0.000429325
AT5G07220	1578.04	1259.16	1522.46	1785.44	1255.41	1451.6	1914.98	1173.63	1509.84	1409.83	1476.42	1815.6	1435.9	1391.52	1853.96	1604.01	1433.24	2095.19	4.10653e-06	0.000449321
AT2G43920	283.606	476.312	357.679	314.389	454.465	423.871	295.794	414.613	385.068	675.561	692.247	343.077	589.085	452.287	389.843	439.344	552.072	342.869	4.1891e-06	0.000455891
AT2G36830	5426.03	2566.43	2912.97	4069.94	3182.44	3403.75	2759.14	2339.01	2962.77	3934.34	4146.84	10723	3025.46	4437.48	7062.34	5837.16	3884.87	9319.3	4.35377e-06	0.000471279
AT3G18290	2272.16	10161	6868.06	2114.24	2133.49	3680.65	2115.69	1648.54	2735.17	9083.89	16650.5	2047.63	9551.82	4527.94	2532.5	2144.83	2056.07	1433.32	4.7694e-06	0.000513523
AT2G20950	978.826	1159.18	949.345	1064.78	1107.09	1080.98	1999.49	1683.23	1594.53	1883.53	1776.58	1227.85	2067.4	1468.45	1587.85	1854.24	1812.73	1526.63	4.97963e-06	0.000533321
AT3G60530	773.57	626.28	612.281	851.282	723.821	541.021	791.344	559.975	620.608	607.201	688.924	760.186	685.132	921.482	1278.53	615.774	702.15	852.832	5.18871e-06	0.000552789
AT5G08380	597.007	692.303	611.25	648.596	827.054	924.422	785.582	921.728	894.522	491.391	560.443	321.409	593.087	598.54	424.212	484.316	629.255	365.654	5.24145e-06	0.000555484
AT4G15233	70.6256	162.229	186.57	90.9836	182.735	312.046	181.51	150.318	345.37	918.442	461.867	201.332	440.213	396.491	225.853	683.809	588.52	224.601	5.29231e-06	0.000557952
AT3G32980	1360.65	257.492	171.109	440.505	312.074	111.825	478.264	295.68	131.002	123.853	305.696	404.469	212.103	167.388	212.106	403.597	146.862	736.734	5.34474e-06	0.00056056
AT2G24570	225.119	144.308	116.478	90.0828	66.4491	87.3302	140.214	109.022	108.507	131.091	95.2532	204.943	119.258	111.592	127.656	134.917	116.846	164.924	5.43576e-06	0.000561381
AT3G19680	1314.3	523.472	402.003	2011.55	443.785	643.261	835.521	399.746	738.378	1090.55	511.709	1676.56	618.7	894.429	1092.93	1323.8	1026.96	1874.93	5.43473e-06	0.000561381
AT5G55820	243.879	254.662	218.524	185.571	290.715	261.991	81.6313	199.047	189.226	236.446	218.196	141.745	170.483	181.76	108.999	164.898	161.87	59.6765	5.43453e-06	0.000561381
AT4G34250	562.797	372.561	328.818	832.365	425.986	419.611	687.624	459.212	391.684	418.205	279.114	452.319	415.401	426.08	508.661	477.398	412.714	496.943	5.84598e-06	0.000600681
AT5G27350	1274.57	1067.69	890.59	1365.66	859.092	642.196	1228.31	697.078	747.641	963.479	1367.88	1458.08	1066.12	995.031	1645.78	1089.71	1174.9	1545.08	6.09058e-06	0.000622655
AT1G29670	4597.28	2380.62	3727.29	5398.66	3831.5	3995.89	4493.57	2835.39	3469.58	3047.26	3163.29	5077.53	3019.06	3893.05	4249.97	4407.28	3176.29	5274.32	6.28882e-06	0.00063969
AT2G38610	561.694	427.266	508.173	626.976	463.957	485.641	607.913	459.212	420.796	458.417	499.525	837.829	457.822	484.412	710.947	676.89	497.401	800.751	6.4536e-06	0.000653169
AT2G24762	536.313	415.005	548.373	284.662	333.432	321.631	208.4	369.187	371.835	435.898	531.646	435.166	533.858	523.3	484.112	239.852	320.523	334.189	7.19704e-06	0.000724789
AT4G32200	109.249	121.672	98.9545	187.372	104.42	104.37	175.747	117.281	132.326	158.435	182.753	316.894	144.07	166.543	223.889	212.177	207.965	330.933	7.29822e-06	0.00073134
AT4G36910	308.987	442.357	469.003	271.149	302.581	362.101	274.665	408.005	424.766	324.913	423.101	213.069	415.401	355.912	281.826	247.924	300.156	251.726	7.56008e-06	0.000753848
AT4G37730	44.141	31.1254	14.4309	30.6281	30.8514	29.8201	40.3355	23.9517	10.5861	25.7357	24.3671	30.6963	28.814	20.2895	29.4591	6.9188	2.14397	4.34011	7.63398e-06	0.000757486
AT1G21640	1697.22	1272.37	1461.64	2313.33	1785.82	1614.54	1823.74	1864.93	1658.04	1643.87	1477.53	2032.28	1547.15	1416.04	1772.46	2164.43	1923.14	2039.85	7.80767e-06	0.000770941
AT3G01345	2.20705	24.523	32.9848	1.80166	2.37318	10.65	5.76221	21.474	29.1117	4.82544	17.7215	3.61133	3.20155	6.76317	0	2.30627	15.0078	4.34011	7.95343e-06	0.000781521
AT1G55260	1459.96	1195.97	1354.44	1664.73	1325.42	1285.46	2017.73	1308.26	1316.64	1427.53	1468.67	2115.34	1688.02	1556.37	2067.05	1713.56	1233.85	2000.79	8.1932e-06	0.000801192
AT5G37770	381.819	194.298	248.417	373.844	177.989	306.721	288.111	147.014	330.814	264.595	219.304	531.769	219.306	261.227	487.058	279.058	230.477	571.81	8.2921e-06	0.000806965
AT3G27060	1048.35	1604.37	1416.29	789.125	1019.28	1178.96	715.475	991.932	996.413	1023.8	1702.37	1009.37	1355.86	1123.53	888.684	920.201	838.292	875.617	8.38376e-06	0.000811981
AT3G26450	4005.79	3014.44	3445.88	4619.45	3366.36	3230.15	5368.46	3045.17	3200.96	4431.36	4967.56	5857.58	4316.49	4604.03	5338	5137.21	4174.31	6084.84	8.85931e-06	0.000849906
AT5G41600	1058.28	812.089	745.251	1030.55	843.667	790.232	1084.26	1053.88	770.136	640.175	633.544	921.793	739.558	754.093	890.648	686.115	735.382	986.29	8.83183e-06	0.000849906
AT4G25420	162.218	56.5915	65.9697	140.529	78.315	99.0452	181.51	72.6811	97.9211	62.7307	106.329	198.623	108.853	83.6942	115.873	106.088	106.126	173.604	9.1128e-06	0.000869514
AT5G11150	528.588	387.652	421.587	562.117	353.604	390.856	553.172	432.783	538.566	173.716	262.5	306.963	267.329	238.402	379.041	177.583	260.492	387.355	9.19257e-06	0.000869514
AT5G57655	1601.21	1367.63	1054.48	2270.09	1428.66	1295.04	1552.92	1364.42	1290.18	1946.26	1365.66	2423.2	1571.96	1614.71	1646.77	2367.38	2469.85	2576.94	9.17607e-06	0.000869514
AT5G57070	397.269	245.23	253.571	299.075	201.721	230.041	302.516	264.295	227.6	223.579	300.158	379.19	273.733	235.02	315.213	347.093	262.636	509.963	9.54458e-06	0.000898611
AT2G15790	250.5	154.684	189.663	254.934	218.333	241.756	245.854	179.225	201.135	197.039	181.646	249.182	214.504	232.484	297.537	200.645	240.125	362.399	9.6184e-06	0.000900231
AT2G30760	15.4493	42.4437	41.231	3.60331	5.93296	37.2751	3.84147	3.30369	19.8489	49.0586	42.0886	2.7085	48.8236	31.2797	9.81971	0	13.9358	0	9.73219e-06	0.000900231
AT4G05190	260.432	249.946	283.463	187.372	240.878	314.176	124.848	220.521	259.358	206.69	259.177	117.368	200.097	249.392	119.801	199.492	226.189	72.6969	9.69401e-06	0.000900231
AT5G16730	1649.77	1327.07	1470.92	1986.33	1209.14	1396.22	1743.07	1502.35	1609.08	1354.34	1575	2127.98	1589.57	1519.18	2045.45	1747	1541.51	2168.97	9.73967e-06	0.000900231
AT2G30695	706.256	753.611	816.375	666.613	886.384	855.197	527.242	733.418	764.843	669.128	706.646	521.838	615.498	630.665	509.643	605.395	803.989	568.555	1.00184e-05	0.00092178
AT1G72430	452.445	205.616	210.278	583.736	160.19	317.371	262.181	115.629	305.672	594.333	351.108	1468.01	364.176	497.093	795.397	684.962	477.033	1049.22	1.01437e-05	0.000929089
AT5G53450	2511.62	12327.5	10520.1	2505.2	2285.38	5101.36	2408.6	1662.58	3435.18	7539.75	15513	1174.59	9482.99	4634.46	1567.23	1601.7	1612.27	887.553	1.03269e-05	0.000941604
AT4G14200	324.436	364.072	387.572	263.943	355.977	339.736	277.547	367.535	310.966	253.336	314.557	217.583	328.959	273.908	225.853	199.492	227.261	139.969	1.04166e-05	0.000945526
AT5G60930	391.751	357.47	478.28	240.521	425.986	427.066	190.153	314.676	358.603	246.902	273.576	204.943	301.746	401.563	162.025	250.23	349.467	109.588	1.08523e-05	0.000980682
AT1G50490	361.956	326.345	295.833	214.397	275.289	289.681	123.888	207.306	218.337	221.166	230.38	159.801	266.529	297.579	170.863	201.798	243.341	134.543	1.14126e-05	0.00102673
AT4G15160	110.352	15.0911	6.18466	16.2149	11.8659	6.39001	3.84147	3.30369	2.64652	9.65088	6.64557	14.4453	6.4031	10.1448	17.6755	12.6845	6.43191	10.8503	1.15122e-05	0.00103111
AT4G25960	1919.03	1449.69	1657.49	2613.3	1702.76	1773.23	2532.49	1662.58	1669.95	1915.7	1934.97	2883.65	1738.44	1927.5	2363.61	2758.3	1940.29	2584.54	1.19135e-05	0.00106234
AT2G21590	649.976	1253.5	1171.99	459.422	569.564	768.932	565.657	1144.73	811.157	337.781	706.646	327.728	616.298	465.813	376.095	226.014	314.092	266.917	1.20412e-05	0.00106903
AT1G65800	1845.09	1888.27	2202.77	2271.89	3204.98	3228.02	2681.35	2965.06	2989.24	2172.25	1848.58	957.906	1986.56	2091.51	1314.86	2361.62	2231.87	1079.6	1.23577e-05	0.00108288
AT4G13250	1851.71	730.031	1222.5	2935.8	2425.39	1860.56	2548.82	2937.8	2303.79	1417.87	759.81	2899.9	1347.85	1771.95	2465.73	2613	2302.62	3055.44	1.23206e-05	0.00108288
AT5G05460	155.597	256.548	286.556	181.066	300.208	452.626	308.278	275.858	411.533	434.289	409.81	101.117	333.762	366.902	183.629	315.959	332.315	144.309	1.22803e-05	0.00108288
AT1G76490	5603.7	4659.37	4860.11	6537.31	4549.39	4632.76	5339.65	4317.09	4664.48	5050.63	5206.8	6811.88	4559.01	5368.26	6301.31	6667.42	5864.83	6690.28	1.25146e-05	0.0010919
AT2G25510	8897.72	8528.35	12395.1	7986.74	17733.6	25424.8	15721.2	14048.9	21296.5	13708.3	12690.8	3465.98	9679.09	14684.5	7427.63	12497.7	14174.9	5685.55	1.26913e-05	0.00110256
AT3G26960	231.74	111.297	145.339	171.157	132.898	153.36	155.58	114.803	116.447	55.4925	93.038	234.737	75.2364	91.3028	143.368	66.8818	95.4066	214.836	1.28405e-05	0.00111076
ATMG00513	381.819	349.924	310.264	350.422	321.566	270.511	597.349	535.197	744.994	332.151	279.114	322.311	309.75	247.701	367.257	413.975	482.393	308.148	1.29577e-05	0.00111612
AT3G20440	199.738	320.685	240.171	194.579	287.155	230.041	158.461	241.169	248.772	219.557	250.316	159.801	238.515	249.392	158.097	242.158	295.868	179.03	1.31156e-05	0.00112241
AT5G45410	1157.6	575.347	821.528	1210.71	1166.42	1150.2	1591.33	1456.1	1336.49	1179.02	768.671	2198.4	1122.14	1366.16	1829.41	1533.67	1650.86	2374.04	1.31416e-05	0.00112241
AT4G13280	108.145	99.0352	32.9848	20.719	18.9855	13.845	25.93	22.2999	7.93955	22.5187	16.6139	34.3077	16.0078	17.7533	3.92789	27.6752	10.7198	29.2958	1.33891e-05	0.00113875
AT4G14400	6893.72	7445.56	11351.9	4989.69	15711.7	18692.9	10657.2	10751.8	15959.8	12348.3	9672.63	2676	8068.71	10676.5	5026.71	12667.2	10028.4	4651.51	1.37095e-05	0.00116112
AT4G32070	420.443	296.162	355.618	541.398	399.881	367.426	465.779	391.487	407.563	393.273	416.456	566.979	390.589	397.336	440.905	465.866	396.634	585.915	1.37697e-05	0.00116136
AT5G03120	472.308	145.252	381.387	602.654	230.199	381.271	386.068	147.014	346.693	349.04	224.842	1476.13	204.099	393.109	783.613	804.888	360.187	1282.5	1.39165e-05	0.00116404
AT5G45670	755.914	507.438	587.542	963.886	556.511	661.367	614.636	416.264	600.759	570.206	749.842	1189.03	745.961	924.863	969.206	755.303	622.823	845.237	1.3869e-05	0.00116404
AT5G23750	635.63	501.778	570.019	771.109	494.809	575.101	910.43	628.526	538.566	406.141	513.924	673.514	446.616	358.448	644.173	502.766	334.459	709.608	1.45791e-05	0.00121445
AT1G64970	1077.04	1131.83	895.744	1283.68	1159.3	1021.34	1470.32	1520.52	1045.37	891.098	950.317	1071.66	1064.52	872.449	1330.57	721.862	772.901	978.695	1.52575e-05	0.00126575
AT1G30360	4899.65	3392.66	3843.76	6281.47	4237.32	4072.57	4429.22	3890.92	4004.18	3381.83	2587.34	4949.33	2505.21	3207.43	4376.65	4507.6	3665.12	4709.02	1.60327e-05	0.00131756
AT4G24510	860.749	649.86	737.005	987.307	862.652	964.892	956.527	704.511	747.641	969.913	903.798	1745.18	805.99	918.945	1364.94	1123.15	870.452	1523.38	1.60774e-05	0.00131756
AT4G38530	113.663	181.093	197.909	92.7853	179.175	170.4	72.0277	124.714	191.872	210.711	221.519	100.214	139.267	207.967	142.386	101.476	152.222	108.503	1.60605e-05	0.00131756
AT4G11720	2.20705	17.9207	6.18466	0	8.30614	1.065	0	2.47776	0	1.60848	0	0	12.8062	6.76317	1.96394	4.61254	4.28794	0	1.62922e-05	0.00132562
AT5G42350	212.98	212.218	202.032	145.934	155.443	159.75	122.927	121.41	105.861	138.329	107.437	140.842	135.265	109.901	135.512	156.826	126.494	141.054	1.63066e-05	0.00132562
AT2G12400	886.13	626.28	762.774	976.497	588.549	621.961	861.451	744.155	657.659	373.167	431.962	562.465	422.605	391.418	512.589	372.462	303.372	448.117	1.67309e-05	0.00134392
AT4G36870	1009.72	1070.52	981.299	1610.68	1247.11	1080.98	1254.24	991.106	936.866	949.807	1072.15	1214.31	950.06	842.014	1084.1	994.002	1004.45	1256.46	1.67255e-05	0.00134392
AT5G67330	924.753	2421.18	2110	830.563	1028.77	1417.52	1090.02	1332.21	1201.52	1484.63	2982.75	835.121	1916.13	1094.79	803.253	799.122	732.166	769.285	1.66351e-05	0.00134392
AT1G69730	666.529	631.939	922.544	710.753	1064.37	1317.41	935.399	894.473	1104.92	1117.89	1138.61	610.315	1024.5	998.413	763.974	1225.78	1244.57	807.261	1.7239e-05	0.00137926
AT1G57765	308.987	264.094	237.078	298.174	265.797	218.325	296.754	206.48	239.51	321.696	273.576	410.789	236.114	276.444	343.69	329.796	315.164	440.521	1.79846e-05	0.00142325
AT3G09220	59.5903	0.943192	0	36.0331	7.11955	2.13	30.7318	11.5629	1.32326	0	0	18.0567	0	2.53619	0	9.22507	1.07198	65.1017	1.80096e-05	0.00142325
AT5G15410	3185.87	2374.02	3345.9	4575.3	3095.82	2944.73	3488.06	3207.05	3325.35	3170.31	2930.7	5368.25	2726.12	3163.47	4178.29	4116.69	3850.57	5577.04	1.80701e-05	0.00142325
AT5G55730	1367.27	887.544	1087.47	1418.8	1156.93	1161.92	1206.22	897.777	987.15	872.6	1004.59	2322.09	1069.32	1179.33	1669.35	1216.56	928.339	1930.26	1.78975e-05	0.00142325
AT4G04830	573.833	1550.61	830.805	426.092	792.643	565.516	650.17	683.863	689.417	922.463	1624.84	385.51	1307.83	852.159	670.687	430.119	721.446	274.512	1.89959e-05	0.00149037
AT5G56300	11.0352	3.77277	2.06155	30.6281	2.37318	6.39001	11.5244	1.65184	2.64652	0.80424	0	3.61133	3.20155	3.38158	9.81971	3.4594	4.28794	11.9353	1.92127e-05	0.00150156
AT1G61740	1434.58	765.872	1076.13	1302.6	1038.27	1105.47	1080.41	965.502	1044.05	1265.07	1138.61	3700.71	986.878	1154.81	1507.33	1594.78	1394.65	2771.16	1.93294e-05	0.00150487
AT2G14247	41.9339	969.602	727.728	7.20662	16.6123	217.26	9.60369	0	101.891	488.174	1668.04	1.80567	749.163	180.069	31.4231	4.61254	0	0	1.94141e-05	0.00150567
AT5G42860	366.37	109.41	169.047	155.843	124.592	146.97	153.659	121.41	146.882	91.6833	202.69	290.712	108.052	125.119	210.142	124.538	105.055	264.747	1.95431e-05	0.00150989
AT2G29720	83.8678	177.32	98.9545	82.8762	117.473	166.14	146.936	138.755	243.479	486.565	554.905	162.51	308.149	259.537	166.935	262.915	277.644	168.179	1.96784e-05	0.00151456
AT1G12500	773.57	411.232	575.173	750.39	573.124	613.441	649.209	480.686	505.484	714.165	639.082	1561.9	552.267	667.017	1082.13	1007.84	654.983	1183.77	1.99211e-05	0.00152388
AT1G19450	1137.73	444.244	795.759	1128.74	726.194	674.147	517.639	483.99	697.357	538.036	677.848	2564.05	529.857	617.139	1255.94	1037.82	690.358	1874.93	2.00281e-05	0.00152388
AT1G22770	2308.57	2093.89	2144.01	3400.63	2915.46	2437.79	2825.4	3162.45	2672.98	1611.7	1313.61	1997.97	1547.95	1778.71	1926.63	2051.43	2005.68	2285.07	2.0078e-05	0.00152388
AT1G48300	4319.19	7225.8	6074.36	4239.3	4583.8	4765.89	3896.22	2884.94	3771.28	7410.27	9457.75	2490.01	8270.4	7047.22	5015.91	3346.4	4489.47	1867.33	2.01006e-05	0.00152388
AT5G12930	41.9339	96.2056	61.8466	62.1571	84.248	107.565	49.9392	79.2885	64.8396	105.355	111.867	25.2793	100.849	90.4574	28.4772	124.538	98.6226	39.061	2.02399e-05	0.00152872
AT5G25140	155.597	143.365	136.062	242.323	144.764	132.06	174.787	142.884	103.214	207.494	200.475	276.267	192.093	111.592	246.475	179.889	174.734	300.553	2.03814e-05	0.00153368
AT2G22450	454.652	384.823	411.28	599.051	461.584	439.846	597.349	558.323	490.929	298.373	240.348	453.222	274.533	361.829	403.59	371.309	361.259	592.425	2.17051e-05	0.00162724
AT3G20500	621.284	599.87	521.573	708.051	488.876	569.776	731.801	689.644	557.091	422.226	407.595	595.87	481.833	451.441	662.831	493.541	505.977	697.673	2.18998e-05	0.00163578
AT5G27920	174.357	129.217	96.8929	307.182	232.572	253.471	268.903	494.727	533.273	160.848	95.2532	69.5182	410.599	142.027	222.908	247.924	449.162	182.285	2.28518e-05	0.00170061
AT1G64740	663.218	435.755	509.203	658.505	545.832	581.491	678.981	480.686	561.061	579.053	575.949	753.866	459.422	479.34	597.039	726.474	518.841	788.815	2.3273e-05	0.00172561
AT4G04860	377.405	402.743	296.863	387.356	404.628	300.331	421.602	407.179	338.754	364.321	271.361	321.409	412.2	317.869	401.626	385.147	324.811	350.464	2.44764e-05	0.00180821
AT4G13010	2168.43	2018.43	2089.38	2703.38	2211.81	2039.48	2716.88	2424.08	2207.19	2334.71	2494.3	2902.61	2413.17	2128.71	2782.91	2249.76	2391.6	3079.31	2.47384e-05	0.00182092
AT4G24450	595.903	2254.23	1361.65	749.489	1123.7	1409	1032.4	1575.86	1696.42	2286.45	2068.99	888.388	2018.58	1901.3	1517.15	952.489	1793.43	910.338	2.58223e-05	0.00189382
AT4G32980	1046.14	1395.92	1633.78	1012.53	1262.53	1088.43	926.756	1209.97	1012.29	925.68	1095.41	723.169	1167.77	965.442	933.855	757.609	884.387	665.122	2.64816e-05	0.00193516
AT2G25060	421.546	400.857	462.818	243.224	462.771	372.751	184.391	299.809	374.482	312.045	364.399	272.656	373.781	406.635	215.052	314.806	394.49	172.519	2.70251e-05	0.00196778
AT5G05160	305.676	370.675	380.356	227.909	275.289	298.201	215.123	337.802	308.319	271.833	274.684	220.291	349.769	311.951	267.096	159.133	276.572	170.349	2.73712e-05	0.00198583
AT3G01960	72.8326	121.672	110.293	77.4712	141.204	113.955	72.988	141.233	154.821	158.435	193.829	134.522	164.079	137.8	94.2693	80.7194	138.286	78.122	2.79875e-05	0.0020233
AT3G12520	334.368	781.907	474.157	294.571	454.465	412.156	339.01	373.316	382.421	395.686	590.348	113.757	465.826	382.119	167.917	213.33	303.372	112.843	2.89398e-05	0.0020847
AT5G54585	134.63	99.0352	39.1695	218.901	168.496	59.6401	193.034	194.917	34.4047	135.112	110.76	241.959	145.671	108.211	212.106	337.868	185.453	185.54	2.90951e-05	0.00208845
AT2G15320	553.969	401.8	459.726	571.125	495.995	608.116	797.106	527.764	562.384	487.369	544.937	568.785	470.628	463.277	576.417	419.741	537.064	655.357	2.94344e-05	0.00210534
AT5G47990	47.4515	5.65915	6.18466	12.6116	4.74637	2.13	0	1.65184	0	1.60848	4.43038	76.7408	3.20155	0	0	11.5313	0	52.0813	2.98821e-05	0.00212983
AT1G02930	1041.73	4163.25	4110.73	336.009	1306.44	3291.92	2380.75	2869.25	3354.46	7386.14	7485.13	1159.24	6636.81	2725.56	931.891	5249.07	3777.67	1667.69	3.02429e-05	0.00214799
AT1G12240	2894.54	1546.84	1924.46	3287.12	2114.51	2069.3	2703.44	2142.44	1877.7	2218.9	2010.29	2935.11	2108.22	2099.12	2968.5	2852.85	2629.58	2665.91	3.04794e-05	0.00215722
AT2G27510	648.872	330.117	287.586	271.149	284.782	252.406	339.01	286.595	223.631	260.574	229.272	480.307	299.345	286.589	350.564	259.455	236.909	300.553	3.07305e-05	0.00216094
AT3G08040	112.559	80.1714	24.7386	48.6447	68.8223	77.7452	154.619	460.864	185.256	48.2544	60.9177	43.336	189.692	133.573	52.0445	92.2507	165.086	78.122	3.07456e-05	0.00216094
AT1G44110	208.566	169.775	255.632	146.835	174.429	195.96	86.4332	156.099	177.317	112.594	178.323	95.7003	162.479	215.576	85.4315	117.62	192.957	64.0166	3.08753e-05	0.00216255
AT1G75280	2251.19	6018.51	3394.35	2001.64	3276.18	2619.91	2176.2	3378.02	3288.3	2940.3	5355.22	1766.84	4556.61	3078.93	2378.33	1324.95	2701.4	1497.34	3.1358e-05	0.00218127
AT3G62370	441.41	466.88	536.003	554.91	501.928	733.787	485.947	575.667	681.478	533.211	521.677	342.174	481.033	497.093	321.105	618.08	633.543	384.1	3.13391e-05	0.00218127
AT5G57800	1274.57	913.01	1115.3	1282.78	919.608	1084.17	1266.73	818.488	1094.33	1098.59	1179.59	2196.59	1082.12	1153.97	1751.84	1577.49	1069.84	2110.38	3.16991e-05	0.00219744
AT5G48000	128.009	16.9775	8.24621	28.8265	7.11955	2.13	9.60369	13.2147	2.64652	27.3442	11.076	70.421	4.80233	6.76317	1.96394	16.1439	19.2957	17.3604	3.22247e-05	0.00222625
AT5G53870	126.905	49.046	72.1543	106.298	49.8368	59.6401	115.244	50.3812	29.1117	43.4289	59.8101	77.6437	59.2287	69.3225	83.4676	55.3504	43.9514	125.863	3.25647e-05	0.00224209
AT2G34300	920.339	583.836	774.113	882.811	825.868	731.657	923.875	577.319	763.52	709.339	721.044	1508.63	611.496	686.462	1183.28	891.373	686.07	1251.04	3.26807e-05	0.00224245
AT2G26440	269.26	445.187	565.896	185.571	606.348	1494.2	825.917	498.031	1474.11	1451.65	996.836	411.692	902.037	1093.1	490.986	1102.4	1100.93	547.939	3.30653e-05	0.002246
AT4G30470	363.059	310.31	310.264	414.381	353.604	338.671	496.511	361.754	334.784	276.658	325.633	647.331	316.953	385.501	564.634	396.678	309.804	749.754	3.28945e-05	0.002246
ATMG00516	130.216	117.899	129.878	104.496	85.4346	64.9651	179.589	208.958	226.277	129.483	98.576	78.5465	84.0407	103.138	100.161	145.295	165.086	99.8226	3.30008e-05	0.002246
AT2G27360	313.401	239.571	216.463	299.075	268.17	259.861	350.535	259.339	222.307	343.41	270.253	528.157	364.176	369.438	449.743	364.39	351.611	505.623	3.50731e-05	0.0023665
AT4G32410	11640	8470.81	11674.6	13365.6	10195.2	11069.6	12613.5	9798.73	11364.1	8945.56	9039.08	16297	8615.37	9094.77	14811.1	10763.4	8730.24	16650.8	3.49589e-05	0.0023665
AT4G33260	185.392	223.537	171.109	113.504	186.295	227.911	56.6618	186.658	166.73	119.027	103.006	53.2672	144.07	180.069	95.2512	79.5663	140.43	45.5712	3.5682e-05	0.00239959
AT3G44970	96.0066	140.536	92.7698	30.6281	80.6882	45.7951	36.494	101.588	84.6885	63.5349	145.095	37.919	105.651	94.6844	28.4772	35.7472	37.5195	31.4658	3.6785e-05	0.00245743
AT4G18670	2880.2	1620.4	2252.25	3073.62	2198.75	2124.68	2287.6	1743.52	1921.37	1793.45	2280.54	2354.59	1887.31	2263.13	2554.11	2052.58	2222.22	2230.82	3.67632e-05	0.00245743
AT4G20270	853.024	923.385	941.098	590.042	815.188	749.762	568.538	801.97	812.48	760.811	776.424	675.319	785.18	809.044	498.842	516.604	575.656	551.194	3.7335e-05	0.00248597
AT3G56970	72.8326	2838.07	610.219	0	9.49273	138.45	1.92074	0	31.7582	579.857	3702.69	0	943.657	112.438	23.5673	0	0	0	3.80002e-05	0.00252196
AT5G03545	70.6256	415.005	45.3541	16.2149	161.376	164.01	107.561	333.672	197.165	265.399	180.538	139.036	62.4302	77.7764	54.9904	363.237	237.981	45.5712	3.95034e-05	0.00261316
AT1G10585	4.4141	5.65915	2.06155	18.0166	16.6123	10.65	65.3051	16.5184	10.5861	3.21696	8.86076	5.417	6.4031	5.07238	9.81971	11.5313	6.43191	34.7209	4.05817e-05	0.00267575
AT5G26230	322.229	292.39	193.786	281.058	243.251	193.83	333.248	229.606	206.428	184.171	231.487	371.064	203.298	249.392	348.6	156.826	187.597	307.063	4.19891e-05	0.00275956
AT3G57540	174.357	125.445	132.97	192.777	132.898	97.9802	290.031	234.562	124.386	94.9003	88.6076	129.105	106.452	81.158	175.773	78.4131	120.062	147.564	4.25538e-05	0.00278762
AT2G22125	4610.52	3304	3940.66	4663.59	3826.76	4127.95	4223.7	3345.81	4370.72	4354.96	3879.91	6059.82	3437.66	3969.98	5337.01	4443.03	4051.03	6366.94	4.29158e-05	0.00280227
AT1G77260	841.989	737.577	722.574	930.555	822.308	831.767	995.902	792.059	845.562	784.938	861.709	1023.81	812.393	805.662	931.891	864.851	818.996	962.42	4.34113e-05	0.0028255
AT1G03780	222.912	199.014	230.894	149.537	252.744	249.211	95.0765	167.662	174.67	172.107	139.557	91.1862	189.692	219.803	76.5938	114.16	169.374	52.0813	4.36714e-05	0.00283033
AT1G15215	176.564	232.025	184.509	180.166	223.079	195.96	192.074	272.554	244.803	230.013	178.323	165.218	269.731	197.823	173.809	213.33	203.677	145.394	4.37651e-05	0.00283033
AT2G47440	1834.06	890.374	1181.27	2741.22	916.049	1354.68	1314.74	668.996	1572.03	1123.52	694.462	2129.78	823.599	1092.25	1349.23	1600.55	1261.73	2176.57	4.49409e-05	0.00289711
AT2G48080	94.9031	15.0911	10.3078	23.4215	18.9855	7.45502	7.68295	9.91106	1.32326	8.0424	6.64557	19.8623	3.20155	6.76317	11.7837	12.6845	9.64786	18.4455	4.58264e-05	0.00294482
AT4G34560	315.608	514.04	473.126	203.587	315.633	416.416	232.409	314.676	350.663	579.857	615.823	343.077	477.831	475.113	426.176	199.492	407.354	312.488	4.65033e-05	0.00297886
AT5G13840	259.328	246.173	289.648	168.455	282.409	292.876	119.086	308.069	210.398	224.383	282.437	122.785	261.727	275.599	153.188	246.771	251.916	99.8226	4.69245e-05	0.00299636
AT2G22610	216.291	218.821	223.678	176.562	219.519	205.545	101.799	166.836	166.73	144.763	192.722	111.951	156.876	198.668	89.3594	121.079	139.358	58.5915	4.75264e-05	0.00302525
AT1G21140	46.348	9.43192	7.21543	25.2232	21.3586	14.91	53.7806	51.2071	26.4652	27.3442	19.9367	55.9757	14.407	13.5263	21.6034	55.3504	50.3833	49.9113	4.82379e-05	0.00306091
AT5G24110	2.20705	7.54554	0	0	4.74637	2.13	5.76221	8.25921	5.29303	157.631	95.2532	45.1417	136.066	60.8685	23.5673	57.6567	69.679	19.5305	4.86539e-05	0.00307766
AT1G03470	75.0396	163.172	120.601	75.6695	83.0614	68.1602	40.3355	54.5108	60.8698	100.53	146.203	59.587	100.849	83.6942	39.2789	76.1068	73.9669	67.2717	5.00339e-05	0.0031551
AT4G16146	567.211	382.936	522.603	1000.82	517.354	605.986	713.554	618.615	627.224	59.5137	127.373	213.971	163.279	186.833	179.701	108.395	195.101	349.379	5.14081e-05	0.00323168
AT1G54090	687.496	480.085	458.695	670.216	568.377	515.461	681.862	474.079	586.203	583.878	550.475	642.817	550.667	621.366	694.254	642.296	712.87	837.641	5.22034e-05	0.00327152
AT3G53190	777.985	656.462	719.482	547.703	697.716	698.642	352.455	602.923	624.578	572.619	655.696	530.866	775.576	831.024	585.255	492.388	605.671	407.97	5.23673e-05	0.00327166
AT4G16480	233.947	322.572	302.017	227.009	249.184	273.706	186.312	294.028	247.449	356.278	323.418	233.834	262.527	328.859	213.088	272.14	320.523	180.115	5.37786e-05	0.0033495
AT2G16850	264.846	292.39	339.125	266.645	344.112	325.891	166.144	279.161	296.41	234.034	224.842	162.51	273.733	253.619	163.989	129.151	230.477	125.863	5.50082e-05	0.0034066
AT5G47720	294.641	383.879	331.91	312.587	327.499	390.856	291.952	399.746	432.705	352.257	381.013	259.113	445.816	422.698	321.105	231.78	343.035	244.131	5.50321e-05	0.0034066
AT1G29465	144.562	115.069	131.939	322.496	187.481	173.595	268.903	136.277	131.002	197.843	233.703	257.307	207.3	242.629	318.159	223.708	285.148	252.811	5.57247e-05	0.00342851
AT2G46440	1153.18	1370.46	1765.72	1080.99	2393.36	3220.57	2026.38	1714.61	2842.36	2079.76	1644.78	705.113	1510.33	1794.78	1182.29	1930.35	1855.61	1151.21	5.55673e-05	0.00342851
AT4G09820	121.388	594.211	232.955	45.9422	128.152	173.595	193.034	262.643	173.347	36.995	158.386	7.22267	115.256	47.3422	7.85577	23.0627	27.8716	8.68022	5.66611e-05	0.00347556
AT3G20670	445.824	486.687	410.249	299.976	428.36	539.956	317.882	392.313	362.573	444.745	453.006	301.546	561.072	541.899	333.87	432.425	380.555	239.791	5.9241e-05	0.00361259
AT4G14360	1640.94	1042.23	1434.84	1565.64	1389.5	1246.05	1409.82	1189.33	1332.52	1120.31	1250.47	2019.64	1247.8	1163.26	1718.45	1324.95	1377.5	2032.26	5.9252e-05	0.00361259
AT1G18400	171.046	45.2732	60.8158	146.835	61.7028	53.2501	151.738	64.4219	63.5164	69.1646	55.3798	170.635	47.2229	90.4574	70.7019	96.8633	96.4786	130.203	6.01446e-05	0.00365599
AT4G01630	68.4185	7.54554	4.1231	7.20662	9.49273	0	13.4452	6.60737	0	1.60848	0	4.51417	0	0	0	0	0	4.34011	6.13581e-05	0.0037075
AT4G10770	2082.35	1486.47	1579.15	2363.77	1709.88	1701.87	2048.47	1698.09	1578.65	1550.57	1816.46	2185.76	1633.59	1640.07	2108.29	1970.71	1542.59	1917.24	6.12498e-05	0.0037075
AT3G48500	993.172	1091.27	1067.88	917.944	1136.75	1109.73	704.911	935.769	1048.02	975.543	1003.48	894.708	1036.5	1132.83	784.595	1065.5	1144.88	734.564	6.15679e-05	0.0037091
AT1G55960	864.059	700.792	717.42	992.712	781.964	626.221	758.691	778.018	637.81	973.13	897.152	1475.23	851.612	774.383	1523.04	934.039	881.171	1139.28	6.29361e-05	0.00376909
AT2G39510	123.595	79.2282	36.0772	23.4215	9.49273	23.4301	16.3263	33.0369	9.2628	8.0424	5.53798	16.251	8.00388	8.45396	3.92789	16.1439	15.0078	32.5508	6.28468e-05	0.00376909
AT3G06390	27.5881	7.54554	0	1.80166	4.74637	0	0	0.825921	0	1.60848	2.21519	7.22267	0.800388	0	1.96394	11.5313	0	19.5305	6.32866e-05	0.0037789
AT3G16850	2796.33	1660.96	1781.18	2902.47	1931.77	1979.84	2293.36	1712.14	1967.68	2144.91	1925	3129.22	1769.66	2443.19	2986.18	2913.97	2594.2	2803.71	6.37848e-05	0.00379745
AT3G59010	605.835	293.333	430.864	743.183	479.383	508.006	1392.53	479.034	637.81	389.252	403.165	444.194	417.002	467.504	471.346	780.672	630.327	608.701	6.42683e-05	0.00381501
AT2G38760	93.7996	69.7962	57.7235	102.694	85.4346	78.8102	126.769	102.414	60.8698	102.943	128.481	196.818	106.452	78.6218	143.368	124.538	71.823	155.159	6.45595e-05	0.00382109
AT1G11220	52.9692	82.0577	81.4313	34.2315	83.0614	89.4602	39.3751	86.7217	80.7187	50.6671	46.519	23.4737	73.6357	50.7238	29.4591	36.9003	81.4708	15.1904	6.71167e-05	0.00391739
AT2G28190	685.289	675.326	406.126	296.372	352.418	264.121	326.525	519.505	632.517	771.266	359.968	529.06	352.171	278.135	275.934	535.054	1085.92	756.264	6.6519e-05	0.00391739
AT3G29250	17.6564	0	0	10.8099	2.37318	0	45.1373	8.25921	0	0	0	54.17	0	1.69079	1.96394	9.22507	0	19.5305	6.71542e-05	0.00391739
AT3G53990	2578.94	1477.98	1664.7	3043	2325.72	1809.44	2521.93	2549.62	2256.15	1269.09	1032.28	1862.54	1255.01	1520.02	1908.95	1885.37	1773.06	1904.22	6.68409e-05	0.00391739
AT5G02240	4187.87	3935.94	4735.38	4185.25	4468.7	4585.9	4126.7	4981.96	4795.49	2754.52	2996.04	2542.38	3255.18	3261.54	2766.21	2331.64	2840.76	2235.16	6.70632e-05	0.00391739
AT4G30290	35.3128	1.88638	10.3078	52.248	7.11955	0	3.84147	4.95553	0	5.62968	0	70.421	4.80233	8.45396	26.5132	9.22507	6.43191	65.1017	6.7427e-05	0.00392201
AT5G66230	231.74	216.934	248.417	186.471	212.4	289.681	117.165	210.61	185.256	123.049	152.848	73.1295	160.078	242.629	93.2873	127.998	192.957	56.4214	6.76281e-05	0.00392243
AT5G61190	571.626	598.927	622.589	492.753	704.835	896.732	631.923	617.789	782.045	606.397	697.785	390.024	463.424	558.807	382.969	568.495	613.175	454.627	6.87214e-05	0.00397445
AT1G15210	153.39	47.1596	22.6771	37.8348	26.105	9.58502	17.2866	10.737	7.93955	5.62968	11.076	66.8097	8.00388	19.4441	9.81971	20.7564	6.43191	23.8706	6.99301e-05	0.00403283
AT3G15540	302.366	45.2732	67.0004	240.521	115.099	102.24	149.818	57.8145	100.568	155.218	97.4684	268.141	118.457	156.398	168.899	202.952	130.782	301.638	7.09784e-05	0.00408166
AT2G26690	2466.38	1876.95	1620.38	1920.57	1785.82	1292.91	1751.71	1504	1524.39	1399.38	2132.12	3601.4	1829.69	2008.66	2966.54	1491	1537.23	3181.3	7.11865e-05	0.00408203
AT3G54810	1359.54	711.167	645.266	1576.45	777.217	930.812	1031.44	774.714	1090.36	792.176	656.804	1230.56	650.715	737.185	651.047	747.231	816.852	1398.6	7.14403e-05	0.00408501
AT4G36515	165.529	194.298	219.555	130.62	186.295	173.595	160.382	190.788	193.196	217.949	219.304	142.648	220.907	222.339	201.304	166.051	169.374	124.778	7.18372e-05	0.00409614
AT4G36210	2180.56	2706.02	2534.68	2494.39	3048.35	3044.84	2850.37	3216.14	3193.02	2269.56	2455.54	1551.97	2424.37	2062.77	1888.33	1996.08	2311.2	1804.4	7.25939e-05	0.00412765
AT4G20260	5369.75	3596.39	4062.29	7376.88	4172.06	5105.62	5817.91	3574.59	5278.47	6748.38	4500.16	10504.5	4591.02	6408.95	8644.29	9471.84	6707.41	10164.5	7.42488e-05	0.00420993
AT3G24530	397.269	309.367	305.11	345.017	339.365	282.226	358.218	325.413	288.47	335.368	302.373	481.21	307.349	301.806	430.103	330.949	356.971	527.324	7.44684e-05	0.00421059
AT1G14900	271.467	443.3	392.726	202.686	367.843	341.866	150.778	286.595	345.37	338.585	403.165	315.992	448.217	349.994	278.88	270.987	378.411	260.407	7.50042e-05	0.00422907
AT3G55110	260.432	421.607	409.218	240.521	361.91	381.271	324.605	332.02	346.693	186.584	310.127	116.465	299.345	317.869	109.981	208.717	210.109	108.503	7.57734e-05	0.00426057
AT5G65870	119.181	157.513	129.878	88.2811	124.592	74.5502	215.123	260.165	193.196	96.5088	131.804	99.3117	112.054	109.901	106.053	68.0349	116.846	71.6118	7.67101e-05	0.00430129
AT1G13930	23028.3	19213.8	21581.4	30348.9	22213	19716.4	24434.7	26148.7	19347.3	10800.1	11190	17202.6	12036.2	12157.6	15869.6	13054.6	13112.5	19559.8	7.83149e-05	0.00437914
AT3G05650	619.077	662.121	684.435	751.29	1047.76	977.672	915.231	1083.61	1089.04	309.632	425.317	296.129	363.376	374.51	265.132	258.302	411.642	326.593	7.93914e-05	0.00441495
AT3G14850	77.2467	47.1596	41.231	69.3637	37.9709	61.7701	101.799	31.385	52.9303	74.7943	53.1646	172.441	41.6202	65.9409	58.9183	57.6567	60.0311	145.394	7.91875e-05	0.00441495
AT1G11840	10551.9	13030.2	14538.1	8695.69	11145.7	11568.1	11510	13426.2	11728	7370.86	11554.4	4684.8	10626.7	9331.48	5670.89	6277.66	7533.91	5058.4	8.0528e-05	0.00446588
AT3G03050	719.498	592.325	678.251	811.646	609.908	615.571	774.057	578.145	692.064	698.08	670.095	954.295	649.114	678.853	802.271	779.519	661.415	974.355	8.09737e-05	0.00447833
AT3G23820	6072.69	4926.29	5791.93	6853.5	5718.18	5650.9	7292.08	5095.94	5741.61	4729.73	6024.21	13037.8	5305.77	5173.82	9049.85	6311.1	4508.77	13244.9	8.15482e-05	0.00449782
AT3G50120	66.2115	5.65915	12.3693	68.4629	14.2391	21.3	46.0977	13.2147	23.8186	14.4763	24.3671	68.6153	3.20155	16.9079	62.8462	43.8191	15.0078	42.3161	8.33947e-05	0.00458716
AT3G19050	450.238	466.88	549.404	290.967	449.718	446.236	218.964	428.653	423.442	362.712	304.589	272.656	364.977	431.152	161.043	268.68	396.634	169.264	8.39923e-05	0.00459506
AT5G14565	24.2775	49.9892	117.508	43.2397	78.315	94.7852	31.6922	51.2071	59.5466	28.9526	58.7025	29.7935	51.2248	79.4672	48.1166	31.1346	27.8716	26.0407	8.39553e-05	0.00459506
AT5G40380	576.04	359.356	419.526	644.092	486.503	516.526	599.27	386.531	424.766	379.601	408.703	1414.74	415.401	489.484	862.171	683.809	291.58	1240.19	8.53383e-05	0.00465611
AT5G61460	180.978	375.391	271.094	159.447	257.49	211.935	173.827	255.21	220.984	309.632	268.038	244.668	306.548	240.938	264.15	264.068	216.541	214.836	8.66707e-05	0.0047161
AT1G49480	527.485	575.347	640.112	467.53	560.071	556.996	495.55	621.093	656.336	746.335	691.139	501.072	648.314	608.685	543.03	627.305	678.566	493.688	8.84621e-05	0.00480067
AT4G37800	2832.75	837.555	2164.63	2826.8	1338.48	1928.72	2233.82	869.695	1611.73	2002.56	2626.11	4699.25	1534.34	2964.8	3948.51	4681.72	2417.33	4405.21	9.01115e-05	0.0048771
AT5G67385	2205.94	1786.41	1844.06	1863.81	1579.35	1484.61	1576.93	1245.49	1597.17	1822.41	1823.1	2941.43	1796.87	1738.13	2935.11	2478.09	2027.12	2681.1	9.20549e-05	0.004969
AT3G20510	273.674	156.57	184.509	225.207	245.624	266.251	382.227	317.98	418.149	213.928	220.411	294.324	202.498	321.25	318.159	372.462	339.819	315.743	9.27298e-05	0.00499212
AT3G49570	54.0727	554.597	89.6775	70.2646	140.018	63.9001	92.1954	127.192	142.912	129.483	270.253	66.8097	383.386	136.109	107.035	51.891	85.7588	42.3161	9.32751e-05	0.00500816
AT4G13840	4148.15	3628.46	4557.06	6352.64	4410.56	4659.39	7006.85	4520.27	4872.23	4237.54	4834.65	5247.27	4353.31	3958.14	5642.41	4988.46	4037.09	5860.24	9.47856e-05	0.00507579
AT4G22880	1074.83	3436.05	2539.83	192.777	773.658	1278	909.469	1644.41	1114.18	56.2968	829.589	9.02833	734.756	257	27.4952	18.4501	23.5837	8.68022	9.73215e-05	0.00519784
AT3G46900	180.978	222.593	264.909	172.959	160.19	264.121	102.759	118.933	134.972	308.024	377.69	119.174	356.973	279.826	352.528	186.808	151.15	141.054	9.78999e-05	0.00520129
AT4G36090	311.194	263.151	313.356	257.637	313.26	394.051	367.821	348.539	490.929	365.125	342.247	340.368	255.324	241.783	215.052	355.165	363.403	296.213	9.77767e-05	0.00520129
AT5G24280	110.352	254.662	145.339	93.6861	163.75	121.41	99.8783	119.759	115.123	170.499	161.709	74.9352	177.686	155.553	126.674	66.8818	124.35	61.8466	0.000100213	0.00531024
AT1G02900	94.9031	32.0685	20.6155	21.6199	18.9855	14.91	24.9696	19.8221	7.93955	19.3018	22.1519	39.7247	20.8101	10.1448	13.7476	62.2692	17.1518	35.8059	0.000101166	0.00533354
AT5G35970	7040.48	5019.67	5781.62	9395.63	7093.44	5442.16	6204.94	7311.88	5590.76	5042.58	4870.1	9072.57	4752.7	4778.18	7573.95	6655.89	5239.86	7925.04	0.00010118	0.00533354
AT5G45650	1263.54	850.76	1039.02	1452.13	1339.66	1104.41	1318.59	1168.68	1227.98	1631.8	1195.1	1904.98	1285.42	1428.72	2103.38	1606.32	1443.96	2580.2	0.000102258	0.00537638
AT1G56710	46.348	113.183	68.0312	29.7273	88.9944	90.5252	56.6618	113.151	92.628	111.789	172.785	69.5182	192.093	145.408	70.7019	39.2066	124.35	48.8263	0.000104357	0.00547254
AT5G27360	419.339	309.367	300.987	436.001	384.456	305.656	262.181	227.954	277.884	423.03	470.728	711.433	358.574	448.905	488.04	495.848	424.506	547.939	0.000104658	0.00547414
AT3G23810	9542.17	4949.87	8283.32	8831.72	8206.47	7904.45	13305.9	11733.9	10420.7	4614.73	6306.65	17047.3	8230.39	7119.08	11888.7	6519.82	6723.49	18530.1	0.000108145	0.00564192
AT1G75750	693.013	166.002	213.371	487.348	371.403	255.601	222.806	165.184	239.51	493.803	173.892	3758.49	192.093	368.593	1496.52	1405.67	449.162	4570.14	0.000109686	0.00564953
AT2G31680	280.295	174.491	210.278	255.835	177.989	213	287.15	221.347	236.863	225.991	261.392	310.575	181.688	202.895	264.15	257.149	226.189	266.917	0.000109492	0.00564953
AT3G26580	2908.89	2583.4	2730.53	4016.79	3072.09	2822.26	3618.67	3315.25	2989.24	2998.21	2615.03	3290.83	2825.37	2812.63	3234.61	3410.97	3427.14	3408.07	0.000109321	0.00564953
AT3G45970	151.183	16.9775	68.0312	190.075	18.9855	59.6401	23.0488	9.08514	51.607	48.2544	18.8291	333.145	16.0078	57.4869	162.025	168.358	28.9436	322.253	0.000108938	0.00564953
AT5G50150	599.214	588.552	599.912	408.976	532.78	564.451	422.562	472.427	496.222	505.867	467.405	464.959	573.878	612.067	495.896	434.732	510.265	376.505	0.000109046	0.00564953
AT1G65960	11275.8	7515.36	9763.51	10934.2	9932.96	9786.31	10563.1	9356.86	9866.21	10605.5	10857.8	13736.6	10096.1	10780.5	14155.1	11115.1	10487.2	15285.9	0.000110699	0.00568721
AT3G57080	206.359	305.594	320.571	245.025	256.304	265.186	209.36	284.117	280.531	343.41	316.772	202.235	355.372	298.425	238.619	310.193	308.732	206.155	0.000111208	0.00569893
AT4G15210	94.9031	195.241	272.125	50.4464	107.98	208.74	217.043	281.639	175.993	111.789	678.956	59.587	426.607	229.948	46.1527	57.6567	94.3347	56.4214	0.000113114	0.00575337
AT5G47200	1147.67	830.009	1009.13	1116.13	918.422	1109.73	1181.25	945.68	1138	1137.2	1075.47	1441.82	1059.71	1095.63	1284.42	1081.64	1140.59	1434.41	0.000112794	0.00575337
AT5G66580	228.43	84.8873	77.3082	239.62	143.578	73.4852	157.5	80.1144	47.6373	182.562	159.494	194.109	177.686	164.007	200.322	181.042	129.71	214.836	0.000113123	0.00575337
AT2G38995	282.502	415.948	376.233	181.066	391.575	406.831	387.029	403.05	346.693	257.357	347.785	117.368	313.752	300.116	174.791	187.961	248.7	82.4621	0.000113607	0.00576348
AT4G38920	3607.42	3001.24	3086.14	3457.38	2994.96	3222.7	3576.41	3287.17	3018.35	2977.3	3141.14	3564.39	3069.49	3229.41	3580.27	3345.24	3181.65	3740.09	0.000115099	0.00582461
AT3G03130	100.421	130.161	183.478	80.1737	137.645	143.775	48.0184	113.151	128.356	86.0537	71.9937	54.17	67.2326	138.645	70.7019	66.8818	85.7588	55.3364	0.000116033	0.00585721
AT2G05540	233.947	99.9784	37.1079	364.835	93.7407	27.6901	173.827	35.5146	22.4954	154.414	125.158	245.571	51.2248	102.293	119.801	530.442	139.358	206.155	0.000117622	0.00590796
AT4G04770	3245.46	1108.25	1802.83	4027.6	3251.26	2505.95	3889.49	4654.89	3179.79	1883.53	923.734	4695.64	1434.29	2531.96	4184.18	3615.08	3243.83	4686.24	0.000117392	0.00590796
AT2G43010	4665.7	3515.28	3881.9	5599.55	4478.2	3897.91	4602.09	3997.46	3895.67	3902.98	3368.2	4044.69	3383.24	3715.52	4630.98	4040.58	3711.21	4316.24	0.000118776	0.00595112
AT1G13608	3.31057	357.47	104.108	0	2.37318	19.17	0	0	19.8489	54.6883	259.177	0	138.467	16.0625	0	0	0	0	0.00012221	0.00610809
AT2G38400	372.991	303.708	204.094	514.373	289.528	239.626	443.69	340.28	271.268	512.301	250.316	548.02	337.764	343.231	368.239	412.822	466.313	608.701	0.000127197	0.00634169
AT1G76670	2450.93	1875.07	2157.41	2447.55	2014.83	2034.15	2437.42	2022.68	2437.44	2171.45	2229.59	3927.32	2064.2	2361.19	3760.95	2449.26	2031.41	4137.21	0.00012839	0.00636976
AT3G03520	363.059	249.946	209.248	298.174	231.385	256.666	406.236	213.914	250.096	314.458	341.139	486.627	368.979	346.612	430.103	408.209	289.436	506.708	0.000128285	0.00636976
AT1G20620	94073.2	51844.5	60544.7	136007	114908	94834.2	165685	141297	117610	155632	82065	105626	123369	143829	124822	161532	177728	144233	0.000130067	0.00643719
AT3G61210	780.192	995.068	975.114	666.613	892.317	918.032	589.666	761.5	747.641	1286.78	993.513	677.125	844.409	1144.67	692.29	694.187	1181.33	440.521	0.000130939	0.00646453
AT4G23260	480.033	950.738	880.283	563.918	853.159	858.392	682.822	698.73	800.571	1539.31	1577.22	845.955	1422.29	1099.86	1113.56	1240.77	1179.18	775.795	0.000132775	0.00653925
AT3G06030	180.978	178.263	236.048	154.042	220.706	194.895	84.5124	158.577	156.144	93.2918	196.044	103.826	137.667	152.171	107.035	92.2507	117.918	60.7616	0.000135434	0.00663791
AT3G11700	2113.25	1159.18	1842	2324.14	1587.66	2112.96	2065.75	1191.8	2093.39	2278.41	1721.2	3687.17	1628.79	2275.81	3127.58	2692.57	2240.45	3800.85	0.000135363	0.00663791
AT5G41740	225.119	264.094	445.295	165.752	327.499	500.551	354.376	289.898	575.617	476.11	405.38	181.469	294.543	362.675	256.295	393.219	394.49	182.285	0.000136207	0.00665967
AT1G05850	15921.6	8753.77	12011.6	15310.5	13245.9	13109.1	16187	11508.4	12609.3	11542.4	12097.2	16660.9	11123.8	13228.8	14949.5	15563.9	13062.1	16281.9	0.00013856	0.00675838
AT5G05170	11571.6	7944.51	10976.7	12057.6	9932.96	10740.5	12349.4	9731.01	11300.6	9741.76	9095.57	16583.2	9020.37	9840.41	14384.9	11646.7	9554.6	16092	0.000141281	0.00687452
AT3G21770	278.088	136.763	117.508	62.1571	98.4871	57.5101	97.9576	76.8107	55.5768	35.3866	63.1329	116.465	56.0271	57.4869	89.3594	109.548	34.3035	132.373	0.000144464	0.00701257
AT3G49720	1760.12	1220.49	1635.84	1954.8	1664.79	1682.7	2103.21	1256.23	1614.37	1500.71	1375.63	2857.47	1495.92	1646.83	2194.71	2223.24	1570.46	2827.58	0.000145071	0.00702518
AT1G17590	219.601	324.458	236.048	158.546	227.826	236.431	181.51	233.736	236.863	242.076	240.348	197.72	252.122	253.619	208.178	196.033	220.829	155.159	0.000145725	0.00704002
AT3G57400	973.308	818.691	808.128	1062.08	961.139	894.602	1217.75	686.341	951.422	1583.55	1386.71	1925.74	1411.88	1268.94	2221.22	1526.75	1331.41	2124.48	0.000147815	0.00712396
AT1G16500	190.91	229.196	232.955	165.752	233.759	253.471	218.964	247.776	272.591	190.605	199.367	115.563	198.496	170.77	104.089	200.645	230.477	100.908	0.00014956	0.00719095
AT4G20880	349.817	307.481	277.279	421.587	297.834	271.576	407.196	409.657	309.642	297.569	276.899	375.579	322.556	285.744	359.402	324.031	310.876	383.015	0.000154318	0.00738466
AT5G52060	2002.9	1427.99	1689.44	1943.99	1619.7	1541.06	2024.46	1658.45	1779.78	1496.69	1747.79	2992.89	1665.61	1673.88	2378.33	1771.21	1279.95	3016.38	0.00015426	0.00738466
AT1G14830	1639.84	1228.98	1475.04	1637.71	1518.84	1613.48	1741.15	1411.5	1529.69	1499.91	1546.2	2267.01	1422.29	1563.14	1872.62	1499.07	1377.5	2047.45	0.000156444	0.00746722
AT3G24300	251.604	1.88638	4.1231	54.9505	9.49273	6.39001	1.92074	18.1703	2.64652	0	4.43038	43.336	4.80233	0	17.6755	4.61254	2.14397	17.3604	0.000156781	0.00746722
AT1G43890	915.925	791.338	742.159	923.349	815.188	861.587	1023.75	993.583	936.866	791.372	824.051	1019.3	916.444	860.613	957.422	914.435	954.066	1111.07	0.000158041	0.00747445
AT2G35760	240.568	110.354	205.124	224.306	186.295	191.7	298.675	206.48	169.377	294.352	290.19	593.161	280.936	324.632	559.724	371.309	301.228	469.817	0.000157425	0.00747445
AT2G45190	513.139	534.79	546.311	526.984	487.689	472.861	363.019	400.572	346.693	625.699	615.823	532.672	461.824	473.422	508.661	688.421	560.648	512.133	0.000157936	0.00747445
AT1G52830	61.7974	4.71596	24.7386	86.4795	24.9184	23.4301	46.0977	13.2147	25.1419	20.9102	21.0443	93.8947	17.6085	37.1974	44.1887	59.963	25.7276	74.8669	0.000158773	0.00749156
AT1G31690	972.205	321.629	532.911	891.82	806.882	711.422	953.646	616.137	617.961	172.107	153.956	584.133	243.318	257	315.213	362.084	348.395	495.858	0.000160286	0.00754132
AT4G30270	2517.14	828.123	943.16	1880.93	1372.89	1329.12	2958.9	773.062	1141.97	3783.95	1818.67	4473.54	1698.42	3015.53	4153.74	4398.05	2598.49	5070.34	0.000160572	0.00754132
AT4G21680	35.3128	21.6934	4.1231	12.6116	0	0	36.494	8.25921	7.93955	8.84664	2.21519	12.6397	1.60078	1.69079	13.7476	56.5036	8.57588	10.8503	0.000162784	0.0076275
AT5G06700	1712.67	1119.57	1651.3	1968.31	1712.25	1701.87	1976.44	1478.4	1558.8	1557.81	1493.04	2423.2	1320.64	1679.8	2201.58	2211.71	1917.78	2356.68	0.000165641	0.00774343
AT1G04040	880.612	347.095	541.157	797.233	415.307	685.862	759.652	275.032	602.082	1132.37	732.12	3066.02	727.552	1215.68	2200.6	2632.61	1214.56	2819.99	0.000166183	0.00774441
AT3G63120	442.513	392.368	409.218	592.745	433.106	392.986	500.352	441.042	477.696	419.813	465.19	878.457	457.021	490.33	754.154	449.722	452.378	1018.84	0.000166427	0.00774441
AT1G06980	107.042	47.1596	47.4157	127.918	90.181	74.5502	125.808	61.1182	103.214	77.207	44.3038	102.923	100.048	89.612	104.089	85.3319	85.7588	173.604	0.000170825	0.0079127
AT5G66620	52.9692	23.5798	27.8309	37.8348	30.8514	46.8601	85.4728	71.8552	71.4559	30.5611	19.9367	71.3238	36.0174	38.8882	70.7019	91.0976	64.3191	80.2921	0.000170762	0.0079127
AT2G42730	99.3172	187.695	117.508	69.3637	84.248	89.4602	71.0673	82.5921	112.477	105.355	136.234	89.3805	144.87	128.5	89.3594	69.188	65.3911	74.8669	0.000171886	0.00794365
AT5G44130	721.705	294.276	567.958	584.637	433.106	635.806	875.856	360.928	681.478	587.095	444.146	2653.43	426.607	726.195	1513.22	1449.49	778.261	2121.23	0.000173069	0.00798012
AT3G16360	349.817	937.533	771.02	377.447	461.584	642.196	314.041	324.587	606.052	606.397	824.051	200.429	618.7	622.211	546.958	245.618	589.592	307.063	0.000180875	0.00832107
AT5G43290	22.0705	28.2958	13.4001	19.8182	7.11955	2.13	3.84147	4.95553	2.64652	23.323	13.2911	18.0567	12.8062	13.5263	15.7115	27.6752	21.4397	44.4861	0.00018186	0.00834742
AT3G12760	772.467	752.668	682.374	659.406	719.074	678.407	871.054	982.021	834.976	770.462	770.886	721.364	848.411	897.811	916.179	840.635	849.012	826.791	0.000189512	0.00865938
AT3G63200	1096.9	614.018	907.083	853.985	730.94	854.132	850.887	554.193	804.541	478.523	752.057	1137.57	590.686	722.814	894.576	597.323	473.817	1099.13	0.000189472	0.00865938
AT5G16250	480.033	465.937	455.603	317.091	500.742	521.851	244.894	315.502	455.201	349.04	431.962	311.477	450.618	469.195	228.799	387.453	420.218	241.961	0.000194328	0.00885943
AT1G08200	4627.08	3392.66	3955.09	4246.5	3744.88	3742.42	4444.59	3970.2	4103.42	3221.78	3686.08	5714.93	3416.85	3471.2	5129.82	3756.91	3076.6	5467.46	0.000197231	0.00897156
AT4G33490	919.236	499.892	656.604	1051.27	771.285	703.967	985.338	971.284	920.987	431.073	384.335	589.55	467.426	530.909	551.868	569.648	612.103	639.081	0.000197885	0.00898114
AT3G28050	1680.67	1768.49	1565.75	2038.57	1878.37	1768.97	2278.95	2015.25	1832.71	1841.71	1866.3	2500.85	2113.82	1945.26	3101.07	1855.39	2048.56	2895.94	0.000200124	0.00906246
AT5G56610	123.595	116.956	157.709	101.794	142.391	186.375	118.125	156.099	198.489	101.334	103.006	68.6153	128.862	157.244	72.6659	106.088	111.486	91.1423	0.000202083	0.0091307
AT5G11420	5147.94	2874.85	3672.65	5289.66	4221.89	3987.37	4673.15	3423.44	3996.24	3367.35	3411.39	6402.89	3150.33	4090.03	5857.46	6554.41	4219.33	6006.71	0.000206195	0.00929577
AT1G52280	518.656	349.924	464.88	476.538	390.389	508.006	439.849	358.45	445.938	376.384	410.918	560.659	349.769	378.737	482.148	379.381	392.346	537.089	0.000206952	0.00930918
AT1G68150	19.8634	0	2.06155	21.6199	0	2.13	3.84147	0	0	3.21696	0	7.22267	1.60078	0	15.7115	0	0	8.68022	0.000208949	0.00937816
AT2G21540	460.17	117.899	181.417	377.447	247.998	307.786	445.611	222.999	280.531	293.548	238.133	591.356	231.312	384.655	451.707	584.639	420.218	547.939	0.000210009	0.00940485
AT2G27970	253.811	291.446	336.033	196.38	266.983	251.341	180.549	202.351	222.307	182.562	233.703	179.664	241.717	234.175	136.494	174.123	258.348	147.564	0.000213934	0.00954578
AT3G12750	257.121	373.504	263.879	277.455	344.112	330.151	487.867	616.963	615.315	170.499	262.5	130.911	427.407	256.155	294.591	204.105	306.588	353.719	0.000214099	0.00954578
AT3G59320	295.744	411.232	318.51	235.116	294.275	282.226	255.458	331.194	320.228	375.58	305.696	152.579	344.967	317.869	245.493	283.671	296.94	189.88	0.000216071	0.00961256
AT4G17530	1762.33	1602.48	1503.9	1868.32	1597.15	1673.12	1866.96	1778.21	1655.4	1610.89	1673.58	2417.79	1623.99	1600.33	2039.55	1696.26	1546.87	2176.57	0.000217827	0.00966943
AT1G70280	908.2	587.609	728.759	1120.63	729.754	718.877	839.362	648.348	649.719	791.372	700	943.461	757.167	821.725	856.279	857.932	732.166	958.08	0.000220306	0.00975807
AT3G48990	4310.37	2414.57	3141.81	4650.97	2838.33	3127.91	4622.25	3601.02	3738.2	2612.98	3745.89	3293.54	2873.39	3174.46	3307.28	3357.93	4201.11	3950.59	0.000221348	0.00978279
AT1G75900	817.711	581.007	795.759	1024.24	824.681	1012.82	1001.66	967.154	1021.55	374.776	448.576	731.295	536.26	498.784	708.001	529.289	520.985	974.355	0.000226153	0.00997339
AT2G40100	898.269	695.133	1286.41	960.283	1082.17	1670.99	1075.61	1342.95	1695.09	744.726	835.127	466.765	1030.1	743.103	403.59	822.185	981.938	537.089	0.000228405	0.0100508
AT3G14810	1025.17	763.986	982.329	1351.24	937.407	741.242	1069.85	867.217	807.187	625.699	982.437	1213.41	757.967	594.313	1067.4	626.152	541.352	1165.32	0.000231675	0.0101506
AT3G26600	422.65	499.892	496.834	450.414	671.611	804.077	727.959	616.963	787.338	501.041	497.31	303.352	391.39	388.882	343.69	541.973	483.465	376.505	0.000231248	0.0101506
AT2G37180	741.568	256.548	218.524	287.364	268.17	220.456	231.449	303.113	267.298	273.442	262.5	853.177	316.153	300.961	452.689	224.861	257.276	981.95	0.0002329	0.0101822
AT4G38740	5645.63	7961.49	8662.64	4959.06	7948.98	8383.7	5517.32	8600.32	7693.42	4190.89	5999.84	4592.71	5598.71	5584.69	4104.64	4222.78	4651.34	3980.97	0.000234394	0.0102255
AT5G59790	94.9031	170.718	144.309	82.8762	118.659	115.02	134.452	143.71	153.498	164.065	172.785	108.34	212.103	157.244	142.386	193.727	152.222	117.183	0.000235135	0.0102357
AT1G10540	11.0352	30.1822	28.8617	12.6116	20.1721	21.3	3.84147	13.2147	23.8186	17.6933	35.443	7.22267	40.0194	27.8981	30.4411	0	10.7198	4.34011	0.000240557	0.0104493
AT3G23050	3684.67	1729.81	2313.06	3637.54	2662.71	2509.15	3322.88	2139.14	2420.24	3535.44	3638.45	4741.68	3282.39	4037.61	4668.29	4530.66	4084.26	4410.64	0.000244475	0.0105674
AT4G32140	313.401	232.025	222.648	338.711	246.811	260.926	324.605	226.302	264.652	288.722	297.943	340.368	300.145	245.165	317.177	322.878	278.716	448.117	0.000243806	0.0105674
AT5G19470	327.747	7270.13	2410.98	400.868	1865.32	1566.62	1238.88	2623.95	3510.6	709.339	3035.92	112.854	2911.81	718.587	495.896	103.782	837.22	56.4214	0.000244844	0.0105674
AT5G03610	392.855	331.061	327.787	288.265	238.505	283.291	387.029	322.935	308.319	431.877	400.949	404.469	327.359	346.612	404.572	311.346	301.228	328.763	0.000245591	0.0105771
AT4G33270	417.132	476.312	462.818	261.24	425.986	526.111	200.717	332.02	351.987	277.463	296.835	250.085	332.161	426.08	214.07	302.121	397.706	91.1423	0.000247244	0.0106257
AT4G23130	215.187	166.945	307.171	236.017	535.153	681.602	362.059	327.065	664.275	980.368	580.38	286.198	531.457	653.491	384.933	782.978	618.535	451.372	0.00024878	0.0106691
AT1G73530	691.91	625.337	772.051	715.257	834.174	880.757	567.578	801.97	760.873	626.503	654.589	401.761	661.12	656.873	447.779	597.323	557.432	371.08	0.000250612	0.0107023
AT5G09220	5022.14	4764.07	2879.99	2734.01	3153.96	2840.36	2027.34	2332.4	2470.52	3452.6	4254.27	4440.13	2945.43	3822.88	3477.16	3472.09	2964.04	3525.26	0.000250553	0.0107023
AT4G14640	3.31057	0	4.1231	1.80166	2.37318	2.13	17.2866	1.65184	13.2326	1.60848	17.7215	10.834	0	6.76317	0	2.30627	10.7198	6.51017	0.000252599	0.0107645
AT3G49940	410.511	137.706	138.124	230.612	151.884	160.815	166.144	128.018	132.326	180.954	202.69	218.486	171.283	216.421	341.726	212.177	167.23	247.386	0.000254787	0.010815
AT3G59220	57.3833	28.2958	6.18466	34.2315	35.5977	8.52002	23.0488	9.91106	7.93955	8.0424	8.86076	27.085	14.407	8.45396	17.6755	13.8376	0	19.5305	0.000254854	0.010815
AT1G01600	206.359	99.9784	152.555	201.785	132.898	162.945	493.63	135.451	195.842	221.97	305.696	418.915	291.341	216.421	281.826	260.608	180.093	295.128	0.000257023	0.0108582
AT1G13650	999.793	186.752	221.617	605.356	514.981	303.526	394.712	412.135	211.721	192.213	75.3165	569.688	160.078	245.165	307.357	442.803	231.549	507.793	0.000256476	0.0108582
AT2G47560	26.4846	8.48873	12.3693	19.8182	18.9855	8.52002	10.5641	3.30369	13.2326	49.0586	43.1962	102.923	40.0194	49.033	107.035	29.9815	37.5195	101.993	0.000257481	0.0108582
AT1G10522	322.229	413.118	341.187	290.067	399.881	388.726	207.44	296.506	303.026	349.04	366.614	331.34	363.376	464.122	332.888	284.824	320.523	287.532	0.00025832	0.0108709
AT2G45480	39.7269	83.9441	49.4772	21.6199	26.105	37.2751	21.1281	23.1258	27.7884	32.9738	38.7658	21.668	24.0116	44.806	15.7115	25.3689	15.0078	8.68022	0.000260304	0.0109317
AT3G10720	694.117	462.164	680.312	740.481	517.354	930.812	590.627	333.672	825.713	574.227	754.272	835.121	380.984	422.698	537.138	959.408	740.741	794.24	0.000265563	0.0111294
AT5G59670	274.778	408.402	604.035	145.033	861.465	1280.13	488.828	445.172	991.12	543.666	497.31	168.83	360.975	480.185	365.293	479.704	487.753	190.965	0.000269198	0.0112585
AT1G53160	94.9031	190.525	216.463	103.595	142.391	194.895	92.1954	223.825	209.075	99.7257	159.494	88.4777	93.6453	138.645	100.161	69.188	141.502	73.7819	0.000269926	0.0112657
AT5G25110	217.394	362.186	212.34	300.877	275.289	194.895	356.297	365.883	308.319	53.0798	99.6836	65.004	192.093	150.48	125.692	47.2785	72.895	71.6118	0.000271245	0.0112974
AT3G23890	737.154	662.121	739.066	526.083	670.424	789.167	258.339	638.437	648.396	458.417	529.43	362.939	538.661	666.172	327.978	480.857	562.792	196.39	0.000273841	0.0113821
AT1G73260	82.7643	3.77277	6.18466	55.8513	35.5977	8.52002	962.289	83.4181	15.8791	1.60848	26.5823	55.9757	38.4186	30.4343	25.5313	175.276	12.8638	151.904	0.000274856	0.0114009
AT1G69720	105.938	134.877	203.063	145.934	212.4	275.836	276.586	221.347	281.854	251.727	208.228	135.425	252.122	279.826	156.133	285.977	218.685	117.183	0.000282018	0.0116347
AT3G03630	253.811	291.446	273.156	244.124	290.715	281.161	165.183	224.651	209.075	240.468	233.703	223	273.733	282.362	229.781	264.068	296.94	189.88	0.000281687	0.0116347
AT3G61130	2668.32	1861.86	2260.49	2901.57	2318.6	2264.2	2412.45	2084.63	2463.91	1767.72	2011.39	3375.69	2026.58	2054.31	2720.06	2284.36	1836.31	3309.33	0.000282218	0.0116347
AT5G51010	785.709	230.139	357.679	927.853	799.763	684.797	767.335	950.636	748.964	539.645	340.032	1290.15	467.426	734.649	868.063	1071.26	925.123	1309.63	0.000287462	0.0118268
AT1G67550	576.04	611.189	751.436	557.612	727.381	817.922	762.533	811.881	989.797	770.462	609.177	406.275	743.56	718.587	488.04	566.189	708.582	542.514	0.000289668	0.0118748
AT3G53260	1936.69	1690.2	1890.44	1631.4	1498.67	1482.48	1893.85	1635.32	1468.82	2219.7	2338.13	3228.53	2455.59	1990.91	2878.16	2250.92	2050.71	3015.29	0.0002898	0.0118748
AT2G21140	968.894	439.528	511.265	904.431	696.529	514.396	1937.06	474.079	643.103	749.551	822.943	1291.05	838.806	738.031	1075.26	1067.8	767.541	874.532	0.000290793	0.0118914
AT1G51790	50.7621	29.239	70.0928	20.719	155.443	272.641	69.1465	58.6404	248.772	340.998	135.127	99.3117	173.684	214.731	51.0625	270.987	356.971	48.8263	0.000295465	0.0120411
AT3G14595	1056.07	755.497	633.927	1268.37	691.783	624.091	1146.68	938.247	734.408	530.798	564.873	637.4	566.674	596.004	833.694	614.62	654.983	674.887	0.000295645	0.0120411
AT2G40670	123.595	63.1939	89.6775	105.397	53.3966	89.4602	112.363	40.4701	119.093	15.2806	32.1203	24.3765	22.4109	37.1974	42.2248	42.666	73.9669	33.6359	0.00029645	0.0120497
AT1G08560	461.273	392.368	458.695	270.248	415.307	538.891	185.351	372.491	422.119	261.378	342.247	223.903	344.967	451.441	170.863	321.724	306.588	95.4825	0.000304303	0.0123441
AT2G42960	132.423	160.343	144.309	112.603	138.831	152.295	102.759	150.318	129.679	172.912	151.741	113.757	171.283	159.78	118.819	99.1695	110.414	97.6525	0.000307956	0.0124673
AT4G37990	2.20705	7.54554	0	0.900828	0	0	464.818	23.1258	0	0.80424	0	4.51417	5.60271	5.07238	1.96394	1.15313	0	27.1257	0.000310151	0.0125061
AT5G47500	1643.15	1476.1	1250.33	928.754	1433.4	1471.83	508.995	1283.48	1156.53	773.679	847.31	476.696	1275.82	1052.52	416.356	495.848	871.524	160.584	0.000309948	0.0125061
AT5G12050	617.974	236.741	182.447	1085.5	240.878	207.675	692.426	179.225	178.64	326.521	328.956	391.83	279.335	267.991	304.411	526.982	319.451	441.606	0.000311202	0.0125236
AT1G12880	125.802	250.889	274.186	168.455	217.146	220.456	173.827	412.135	280.531	98.9215	223.734	90.2833	152.874	117.51	76.5938	132.61	147.934	86.8022	0.000313332	0.0125539
AT2G31890	565.004	662.121	657.635	590.943	645.506	664.562	478.264	658.259	606.052	769.657	590.348	463.153	711.545	814.116	533.211	691.88	668.919	493.688	0.000313817	0.0125539
AT3G25140	1952.13	1672.28	1862.61	1925.97	1619.7	1965.99	2112.81	1763.34	1852.56	1692.92	1918.35	2335.63	1839.29	1798.16	2270.32	1714.71	1789.14	2366.45	0.00031266	0.0125539
AT3G62610	6.62115	15.0911	12.3693	10.8099	21.3586	6.39001	28.8111	48.7294	42.3442	12.8678	6.64557	1.80567	40.8198	10.1448	13.7476	2.30627	4.28794	10.8503	0.000315107	0.0125807
AT1G58290	9544.38	3074.81	3867.47	9955.95	9264.91	6345.28	7533.13	9395.68	7209.11	5787.31	2782.28	13791.7	4603.03	7141.06	10750.6	10189.1	7553.2	13926.3	0.000316877	0.0126264
AT1G06550	845.3	1201.63	875.129	703.547	734.5	822.182	717.395	878.78	902.462	753.573	814.082	650.04	793.984	817.498	606.858	644.602	659.271	589.17	0.000320024	0.0127268
AT5G37990	264.846	446.13	198.94	39.6364	79.5016	125.67	126.769	179.225	141.589	82.0325	376.582	74.0323	216.905	178.379	9.81971	69.188	115.774	23.8706	0.000323605	0.0128439
AT5G41040	236.154	105.638	123.693	180.166	85.4346	66.0301	83.5521	100.762	67.4861	46.6459	54.2722	83.0607	38.4186	47.3422	70.7019	106.088	48.2393	95.4825	0.000327382	0.0129684
AT2G36320	1231.53	1007.33	891.621	1409.8	1037.08	984.062	1404.06	1018.36	1004.35	1192.69	1062.18	1223.34	1008.49	1093.94	1534.82	1403.36	1341.05	1379.07	0.000328048	0.0129694
AT4G30350	317.815	379.163	389.633	369.339	427.173	480.316	418.721	399.746	542.536	233.23	224.842	189.595	209.702	273.063	174.791	313.652	304.444	185.54	0.000332062	0.0131025
AT4G05520	205.256	249.003	216.463	153.141	177.989	193.83	117.165	177.573	128.356	156.023	202.69	94.7975	176.886	221.494	106.053	163.745	197.245	101.993	0.00033761	0.0132955
AT1G28010	90.489	67.9099	38.1387	83.777	37.9709	45.7951	97.9576	46.2516	68.8094	158.435	86.3924	278.073	99.2481	134.418	186.575	183.348	211.181	250.641	0.000338764	0.0133045
AT3G62720	387.337	177.32	205.124	401.769	234.945	295.006	290.992	156.925	299.056	314.458	150.633	552.534	190.492	247.701	367.257	360.931	293.724	505.623	0.000339152	0.0133045
AT1G72500	1093.59	971.488	969.96	1005.32	888.757	879.692	1157.24	1062.13	906.431	1454.87	1284.81	1949.22	1186.97	1398.28	1791.12	1254.61	1356.06	2000.79	0.000341175	0.013358
AT4G04840	527.485	169.775	224.709	576.53	371.403	286.486	610.794	170.966	283.177	529.994	293.513	875.748	213.703	369.438	588.201	1622.46	564.936	735.649	0.000344783	0.0134732
AT2G46750	24.2775	5.65915	0	5.40497	7.11955	0	24.9696	11.5629	10.5861	1.60848	2.21519	1.80567	1.60078	3.38158	3.92789	16.1439	2.14397	39.061	0.000346416	0.0135109
AT4G09160	581.557	261.264	237.078	424.29	249.184	309.916	523.401	225.477	383.745	403.728	337.816	739.42	338.564	410.017	546.958	719.556	489.897	611.956	0.000348233	0.0135556
AT1G49660	533.002	432.925	430.864	611.662	440.225	402.571	660.734	495.553	505.484	446.353	480.696	543.506	453.82	460.741	481.166	380.534	467.385	593.51	0.000349916	0.013595
AT1G15380	132.423	5.65915	0	27.9257	5.93296	0	23.0488	11.5629	5.29303	4.82544	0	14.4453	0	1.69079	0	2.30627	12.8638	50.9963	0.00035672	0.0138075
AT3G05600	190.91	298.992	209.248	148.637	175.616	181.05	144.055	211.436	161.437	197.843	259.177	149.87	245.719	248.546	157.115	136.07	218.685	97.6525	0.000356749	0.0138075
AT3G61070	486.654	450.846	477.249	652.199	663.305	570.841	642.487	632.656	569.001	451.179	425.317	436.971	522.653	504.701	509.643	578.873	605.671	478.497	0.000361117	0.0139499
AT4G17170	1516.24	1204.46	1228.68	1599.87	1228.12	1444.14	1511.62	1302.48	1327.23	1520.01	1290.35	2069.29	1336.65	1333.19	1834.32	1928.04	1403.23	2031.17	0.000363629	0.0140201
AT5G01770	476.722	556.484	684.435	405.373	548.205	616.636	485.947	502.16	546.505	465.655	589.241	452.319	530.657	557.116	419.302	457.794	488.825	426.416	0.00036512	0.0140509
AT4G17970	72.8326	145.252	102.047	106.298	157.817	150.165	97.9576	138.755	158.791	147.176	141.772	106.534	207.3	138.645	155.151	215.636	283.004	120.438	0.00036973	0.0142013
AT5G13740	1217.19	3547.35	2347.08	1261.16	1262.53	1701.87	1206.22	1300.83	1200.19	3048.87	5704.11	995.825	3708.2	1993.44	1124.36	995.155	1183.47	910.338	0.000370594	0.0142075
AT3G63300	184.289	189.582	154.616	82.8762	162.563	192.765	76.8295	147.84	124.386	174.52	160.601	102.02	145.671	144.563	122.746	99.1695	109.342	72.6969	0.000372065	0.0142369
AT1G55265	278.088	232.025	176.263	299.075	211.213	171.465	363.98	173.443	205.105	205.081	305.696	325.923	241.717	193.596	279.862	215.636	216.541	399.29	0.000374453	0.0142743
AT2G26250	4710.94	3735.99	4335.44	5719.36	4389.2	4700.92	5694.99	4156.86	4590.38	5096.47	5101.58	7812.22	5061.65	5051.24	5806.4	6946.48	4985.8	7132.97	0.000374102	0.0142743
AT4G27430	2950.82	2069.36	2635.69	3067.32	2504.89	2541.1	2447.98	2214.3	2493.02	2191.55	2333.7	3551.75	2292.31	2371.34	2997.96	2788.28	2627.43	3200.83	0.000375601	0.0142912
AT3G10200	69.522	146.195	82.4621	77.4712	81.8748	72.4202	34.5733	76.8107	88.6583	49.8629	73.1013	25.2793	93.6453	65.0955	41.2428	43.8191	45.0234	17.3604	0.000378245	0.0143594
AT3G28345	503.207	86.7737	52.5696	168.455	65.2625	27.6901	39.3751	56.1627	51.607	61.1222	66.4557	89.3805	36.0174	73.5495	67.756	87.6382	34.3035	128.033	0.000378812	0.0143594
AT3G46280	88.2819	1.88638	0	32.4298	7.11955	2.13	79.7106	3.30369	0	17.6933	19.9367	160.704	1.60078	13.5263	15.7115	32.2878	40.7354	20.6155	0.00038126	0.0144252
AT1G09230	328.85	257.492	243.263	443.207	326.313	251.341	363.019	441.042	350.663	225.991	221.519	507.392	292.942	294.198	379.041	342.481	347.323	531.664	0.000382649	0.0144486
AT5G44380	160.011	45.2732	10.3078	67.5621	46.2771	14.91	54.741	45.4257	10.5861	113.398	59.8101	171.538	96.8469	73.5495	58.9183	186.808	75.0389	145.394	0.000383308	0.0144486
AT2G41090	9800.4	9303.65	14555.6	9014.58	17578.2	22571.7	17049.4	12770.4	21807.3	13142.9	11654.1	5957.8	10324.2	13380.1	9079.31	13242.6	12881	9507.01	0.000384905	0.0144749
AT5G20400	80.5573	81.1146	94.8314	57.653	91.3675	110.76	99.8783	126.366	133.649	284.701	225.949	116.465	189.692	168.234	96.2332	268.68	152.222	138.884	0.000385434	0.0144749
AT3G07720	495.482	556.484	638.05	499.059	510.234	627.286	856.649	912.643	723.822	524.364	705.538	583.23	550.667	577.405	564.634	418.588	518.841	567.47	0.000388757	0.0145726
AT3G24480	2196.01	1478.93	2113.09	2324.14	1883.12	2308.93	1987	1385.07	2127.8	1819.99	1782.12	3303.47	1554.35	2035.71	2447.07	2204.79	1882.41	3196.49	0.000392825	0.0146979
AT1G25422	23.174	18.8638	6.18466	5.40497	11.8659	6.39001	7.68295	17.3443	10.5861	0	0	0	8.00388	10.1448	7.85577	4.61254	4.28794	2.17006	0.000393735	0.0147048
AT1G33700	180.978	121.672	67.0004	78.372	60.5162	61.7701	104.68	73.507	78.0722	74.7943	93.038	189.595	48.0233	98.0659	164.971	129.151	88.9747	156.244	0.000399987	0.0149107
AT5G18280	972.205	711.167	785.451	900.828	834.174	826.442	898.905	683.863	789.985	781.721	690.032	1150.21	754.765	835.251	995.719	834.869	757.893	1057.9	0.000401343	0.0149338
AT3G59250	39.7269	61.3075	64.9389	41.4381	35.5977	36.2101	17.2866	39.6442	15.8791	60.318	42.0886	51.4615	32.0155	37.1974	29.4591	25.3689	19.2957	19.5305	0.000410708	0.0152542
AT1G20160	793.434	543.279	846.267	583.736	505.488	527.176	249.696	520.33	365.219	354.67	548.26	223.903	356.973	455.668	280.844	107.241	330.171	151.904	0.000416154	0.0154282
AT1G07620	22.0705	60.3643	64.9389	45.0414	115.099	145.905	148.857	85.8958	182.61	230.013	162.816	95.7003	183.289	164.007	133.548	228.321	140.43	110.673	0.000417553	0.0154517
AT1G78570	3032.48	2239.14	2904.73	2747.53	2606.94	3130.04	3997.05	2779.23	3387.54	2596.89	3091.3	5077.53	2863.79	3111.9	4703.64	2535.74	2432.33	5841.79	0.000420426	0.0155297
AT3G29590	216.291	1121.46	501.988	84.6778	219.519	347.191	248.735	552.541	381.098	14.4763	194.937	12.6397	176.886	60.8685	1.96394	16.1439	7.50389	1.08503	0.000421864	0.0155544
AT1G28290	2094.49	2198.58	1717.27	789.125	1618.51	1619.87	828.798	1431.32	1063.9	787.351	1693.51	770.117	1261.41	1520.02	1094.9	1148.52	943.347	653.187	0.000425298	0.0156525
AT1G73540	227.326	151.854	181.417	133.323	123.406	130.995	173.827	187.484	112.477	204.277	215.981	262.724	241.717	240.092	635.336	205.258	181.165	258.237	0.000432876	0.0159025
AT1G31770	318.919	372.561	243.263	87.3803	145.951	217.26	117.165	159.403	141.589	212.319	322.31	245.571	284.138	262.918	212.106	184.501	169.374	238.706	0.000435563	0.0159722
AT3G43920	227.326	323.515	262.848	247.728	302.581	276.901	196.876	298.158	255.389	316.87	321.203	241.959	308.149	303.497	206.214	260.608	286.22	228.941	0.000440758	0.0161335
AT4G23800	758.121	688.53	743.189	533.29	853.159	836.027	384.147	676.43	629.871	498.629	526.108	436.971	753.965	732.113	318.159	424.353	591.736	307.063	0.000442638	0.0161731
AT1G10070	57.3833	116.956	65.9697	115.306	79.5016	75.6152	279.467	178.399	138.942	312.849	110.76	120.077	209.702	153.862	108.999	259.455	240.125	218.091	0.000444824	0.0162237
AT1G13260	872.888	253.719	513.326	862.993	455.651	583.621	896.024	485.642	681.478	1407.42	836.234	1085.21	800.388	1347.56	3446.72	1072.41	1074.13	1532.06	0.000446308	0.0162485
AT3G08770	1054.97	1754.34	1153.44	708.051	1140.31	1160.85	1036.24	1321.47	999.059	456.004	1075.47	357.522	1007.69	817.498	491.968	600.783	545.64	243.046	0.000447919	0.0162779
AT3G10310	135.733	142.422	176.263	126.116	176.802	177.855	79.7106	135.451	134.972	141.546	97.4684	69.5182	90.4438	126.809	68.738	107.241	109.342	49.9113	0.000450077	0.016327
AT2G28780	190.91	35.8413	16.4924	30.6281	18.9855	12.78	3.84147	18.1703	5.29303	11.2594	39.8734	52.3643	43.2209	43.9606	52.0445	11.5313	4.28794	68.3568	0.000462191	0.0167364
AT1G29050	514.242	718.713	452.511	687.332	678.73	627.286	875.856	877.129	887.906	862.949	687.817	462.251	866.019	744.794	732.551	799.122	727.878	615.211	0.000482683	0.0174204
AT4G14746	111.456	70.7394	97.9237	127.017	72.3821	108.63	145.976	85.8958	93.9513	128.678	103.006	216.68	122.459	98.9113	145.332	183.348	130.782	230.026	0.000482801	0.0174204
AT4G08040	41.9339	0	12.3693	36.0331	0	6.39001	10.5641	0	10.5861	6.43392	3.32279	32.502	3.20155	14.3717	27.4952	9.22507	6.43191	30.3808	0.000484447	0.0174381
AT4G19380	196.427	95.2624	115.447	127.918	134.085	132.06	159.421	52.859	129.679	258.965	223.734	521.838	158.477	193.596	389.843	386.3	279.788	488.263	0.000485014	0.0174381
AT3G14330	398.372	403.686	469.003	419.786	479.383	402.571	251.617	389.835	312.289	350.649	334.494	248.279	387.388	346.612	257.277	354.012	391.274	264.747	0.000486836	0.0174726
AT2G17230	1062.69	368.788	826.682	1126.03	526.847	1001.1	638.645	371.665	1099.63	484.957	426.424	1133.96	313.752	651.8	800.307	764.528	559.576	1142.53	0.00048801	0.0174837
AT3G07580	39.7269	56.5915	61.8466	37.8348	67.6357	97.9802	32.6525	44.5998	84.6885	77.207	95.2532	34.3077	82.4399	65.9409	38.2969	96.8633	72.895	60.7616	0.000494399	0.0176191
AT5G25390	81.6608	182.979	130.909	148.637	167.309	189.57	276.586	360.102	218.337	86.8579	138.449	35.2105	174.484	97.2205	126.674	46.1254	85.7588	44.4861	0.000494324	0.0176191
AT5G61040	293.537	270.696	239.14	247.728	253.931	227.911	267.943	280.813	238.186	200.256	204.905	220.291	277.734	273.908	323.069	318.265	243.341	297.298	0.000493982	0.0176191
AT3G28200	794.537	375.391	432.926	700.844	503.115	567.646	474.422	365.883	555.768	360.299	354.43	934.432	396.192	419.316	541.066	588.098	392.346	836.556	0.000497081	0.0176835
AT5G15350	996.482	356.527	498.896	931.456	609.908	682.667	508.035	364.231	575.617	632.132	465.19	1784	488.236	794.672	1079.19	1216.56	674.278	1349.77	0.000498153	0.0176906
AT1G24020	2602.11	3569.98	3823.15	2529.52	3214.48	3625.27	4064.28	3771.98	3341.23	3367.35	4800.32	2073.81	4754.3	4188.09	2647.4	2538.05	2936.17	2151.61	0.000502392	0.0178098
AT4G35060	161.115	71.6826	55.6619	93.6861	80.6882	61.7701	148.857	87.5477	76.7489	83.6409	79.7468	156.19	102.45	147.099	141.404	162.592	95.4066	197.475	0.000506315	0.0179175
AT4G08810	1184.08	831.896	979.237	1324.22	971.818	1066.07	976.695	787.103	992.443	958.654	800.791	1328.97	879.626	935.008	1005.54	1156.59	910.115	1435.49	0.000514298	0.0181683
AT2G23540	103.731	49.046	41.231	88.2811	46.2771	21.3	64.3447	56.1627	21.1721	4.82544	22.1519	73.1295	8.00388	5.07238	25.5313	66.8818	6.43191	52.0813	0.000515736	0.0181873
AT1G34580	180.978	326.345	171.109	79.2729	131.712	134.19	117.165	215.565	191.872	79.6197	200.475	39.7247	147.271	109.901	61.8642	36.9003	78.2549	47.7412	0.000519027	0.0182398
AT4G22570	1016.35	776.247	897.806	1049.46	803.322	811.532	893.143	861.436	672.215	667.519	788.608	890.194	726.752	781.146	985.899	689.574	607.815	777.965	0.000518902	0.0182398
AT3G57157	82.7643	8.48873	7.21543	17.1157	7.11955	10.65	1.92074	2.47776	6.61629	0.80424	6.64557	17.1538	0	4.22698	2.94591	8.07194	4.28794	16.2754	0.000523095	0.0182875
AT4G18970	1500.79	749.838	922.544	1910.66	1035.89	1189.61	1240.8	823.444	1024.2	1322.17	1090.98	2188.47	1060.51	1480.29	1970.82	2744.46	1517.93	1966.07	0.000523075	0.0182875
AT5G67190	112.559	79.2282	84.5236	115.306	61.7028	76.6802	97.9576	60.2923	72.7792	201.864	179.43	238.348	164.079	141.181	396.716	168.358	139.358	199.645	0.000522507	0.0182875
AT5G13490	291.33	376.334	364.895	341.414	382.082	368.491	605.993	566.582	460.494	507.475	583.703	384.607	556.269	492.02	452.689	470.479	396.634	454.627	0.00052837	0.0184401
AT1G70710	453.548	431.982	395.818	283.761	371.403	353.581	239.132	370.013	271.268	433.485	382.12	309.672	388.188	442.988	312.267	322.878	346.251	275.597	0.000533393	0.0185834
AT5G67480	759.225	824.35	1329.7	1214.32	765.352	1573.01	1042.96	972.11	1640.84	652.238	660.127	493.85	531.457	674.626	609.804	471.632	696.79	584.83	0.000535249	0.018616
AT3G05370	218.498	394.254	292.74	287.364	320.38	372.751	220.885	250.254	284.5	422.226	294.62	182.372	320.155	343.231	166.935	303.274	414.858	154.074	0.000536504	0.0186276
AT4G21990	1964.27	5588.42	2904.73	1471.95	3168.2	2782.85	2876.3	3019.57	3265.8	4178.83	6481.65	2288.68	6170.19	3800.06	3293.53	3481.31	3652.25	2757.06	0.000544585	0.0188758
AT2G41480	174.357	1.88638	14.4309	28.8265	4.74637	0	24.9696	6.60737	13.2326	3.21696	11.076	14.4453	1.60078	15.2171	11.7837	2.30627	8.57588	6.51017	0.000545835	0.0188868
AT4G18030	3564.38	2344.78	3407.75	3572.68	2939.19	3543.26	3574.49	2794.09	3545.01	2685.36	2943.99	5698.68	2772.54	2980.87	4717.39	3255.3	2640.3	5674.7	0.00054921	0.0189712
AT5G24120	616.87	750.781	530.85	805.34	658.558	554.866	835.521	967.154	587.526	816.303	784.177	1486.97	803.589	703.369	1459.21	774.906	752.533	1432.24	0.000554104	0.0191076
AT1G64860	3266.43	2008.06	2737.74	3855.54	3530.11	2976.68	3237.4	3804.19	2879.41	2470.62	1676.9	4283.04	2037.79	2318.08	3972.07	3201.1	2965.11	4710.11	0.000563474	0.0193026
AT3G18780	6788.88	4612.21	5452.8	5901.32	5510.53	6001.29	6237.59	4638.37	5773.37	7415.09	6303.32	12395.9	5722.77	6600.01	10695.6	9747.44	7066.52	12567.9	0.000563574	0.0193026
AT5G16360	24.2775	22.6366	22.6771	24.3224	17.7989	17.04	17.2866	18.1703	10.5861	1.60848	2.21519	9.02833	36.0174	15.2171	24.5493	11.5313	19.2957	28.2107	0.000562788	0.0193026
AT5G27890	100.421	123.558	113.385	70.2646	88.9944	135.255	52.8203	134.625	141.589	83.6409	125.158	55.0728	116.857	150.48	74.6298	47.2785	115.774	64.0166	0.000561029	0.0193026
AT1G51500	4131.59	3410.58	3554.12	5166.25	3667.75	3415.46	5301.24	4088.31	3535.74	3710.76	3903.17	4770.57	3757.02	3909.96	4713.46	5425.5	3937.4	4766.53	0.000564781	0.0193113
AT1G68530	7528.24	7140.91	6990.72	9164.12	7336.7	7691.45	12337.9	7818.17	8372.25	11732.3	10435.8	11873.2	10805.2	9431.24	11782.7	13153.8	9802.23	13110.4	0.000573154	0.019551
AT3G44050	172.15	160.343	220.586	118.909	177.989	154.425	100.839	123.062	179.963	172.912	168.354	140.842	166.481	184.296	88.3774	115.313	157.582	48.8263	0.000573724	0.019551
AT1G19850	505.414	545.165	520.542	504.464	510.234	512.266	338.05	475.731	529.303	341.802	394.304	262.724	396.992	389.728	282.808	304.427	307.66	208.325	0.00057652	0.0196133
AT3G54140	1164.22	1079.96	1063.76	1403.49	1099.97	1055.42	1517.38	1093.52	1061.25	1173.39	1421.04	1425.57	1186.97	1181.02	1410.11	1382.61	1263.87	1643.82	0.000578513	0.0196152
AT5G24380	592.593	1035.63	907.083	496.356	573.124	788.102	579.102	574.841	486.959	450.374	1076.58	284.392	734.756	608.685	630.426	396.678	355.899	218.091	0.000577598	0.0196152
AT2G24700	37.5198	60.3643	30.9233	21.6199	30.8514	36.2101	3.84147	19.8221	26.4652	12.8678	31.0127	8.1255	28.814	40.579	11.7837	13.8376	21.4397	4.34011	0.000583384	0.0197143
AT3G15640	921.443	819.634	750.405	671.117	715.515	617.701	799.987	795.362	905.108	887.076	818.513	950.683	778.777	768.465	662.831	966.326	1019.46	1024.27	0.000582691	0.0197143
AT3G13960	41.9339	135.82	56.6927	14.4132	52.21	76.6802	16.3263	19.8221	23.8186	19.3018	18.8291	21.668	20.8101	38.0428	23.5673	55.3504	37.5195	20.6155	0.000585103	0.0197394
AT1G65295	515.346	409.346	425.71	520.679	455.651	517.591	519.559	336.976	436.675	537.232	500.633	720.461	424.205	441.297	622.57	653.827	544.568	672.717	0.000592803	0.0199659
AT5G42530	11804.4	12851.9	16209	11542.3	20461.6	28768.9	22522.6	17428.6	26858.2	23526.4	20560.3	5284.28	18725.1	21200	13076.9	22559.9	25497.2	8869.02	0.000598629	0.0201286
AT1G20823	258.225	201.843	272.125	257.637	196.974	187.44	280.428	156.925	224.954	153.61	261.392	587.744	204.899	288.28	416.356	262.915	191.885	595.68	0.000601052	0.0201461
AT3G25400	118.077	132.047	98.9545	107.199	150.697	153.36	111.403	193.266	144.235	110.181	99.6836	49.6558	104.05	100.602	64.8101	68.0349	70.751	45.5712	0.000602133	0.0201461
AT5G47080	421.546	436.698	376.233	397.265	329.872	319.501	464.818	399.746	393.007	525.169	443.038	599.481	475.43	465.813	591.147	418.588	420.218	622.806	0.000601508	0.0201461
AT1G45688	2043.73	1344.05	1718.3	1802.56	1521.21	1752.99	1793.97	1488.31	1709.65	1470.15	1557.28	3394.65	1555.95	1585.96	2193.72	1556.73	1357.13	3213.85	0.000603224	0.0201493
AT1G12200	331.057	778.134	566.927	210.794	392.762	446.236	305.397	431.957	475.049	549.296	746.519	282.587	689.134	467.504	418.32	300.968	382.699	407.97	0.000606954	0.0202072
AT4G23940	1463.27	1417.62	1505.96	1264.76	1502.22	1539.99	917.152	1430.5	1306.06	923.267	993.513	790.882	1030.1	1150.58	790.487	900.598	981.938	801.836	0.000606568	0.0202072
AT2G04160	914.822	1209.17	1170.96	1074.69	1393.06	1181.09	1211.02	2326.62	1392.07	858.124	707.753	748.449	1240.6	1000.95	679.524	786.437	1167.39	781.22	0.000608565	0.0202275
AT4G33050	399.476	675.326	512.296	392.761	793.83	1218.36	1271.53	764.803	1427.79	2497.16	1814.24	771.922	1791.27	1347.56	1075.26	1598.24	1642.28	1061.16	0.000616001	0.0204411
AT1G53140	163.322	120.729	124.724	78.372	135.271	142.71	57.6221	100.762	128.356	82.0325	125.158	48.753	106.452	126.809	51.0625	53.0442	86.8308	21.7006	0.000631071	0.0209069
AT4G37070	75.0396	0	1.03078	21.6199	11.8659	0	15.3659	6.60737	0	1.60848	0	36.1133	3.20155	1.69079	0.981971	11.5313	4.28794	30.3808	0.000634979	0.021002
AT4G39990	739.361	388.595	479.311	600.852	487.689	566.581	579.102	406.353	599.436	506.671	579.272	1036.45	581.081	572.333	733.533	669.971	569.224	910.338	0.000642587	0.021219
AT1G76540	324.436	272.583	294.802	223.405	315.633	346.126	147.897	257.687	185.256	240.468	317.88	130.911	264.928	308.57	182.647	221.402	257.276	112.843	0.000648346	0.0213743
AT1G26820	152.286	148.081	128.847	97.2894	109.166	104.37	69.1465	84.244	67.4861	64.3392	99.6836	78.5465	96.8469	92.9936	92.3053	57.6567	71.823	73.7819	0.000651394	0.0214399
AT5G65480	2413.41	3268.16	3153.14	2613.3	3186	2849.95	3255.65	3529.99	3171.85	3196.05	3466.77	2578.49	4278.07	3217.58	3022.51	3030.44	3233.11	2653.98	0.000658451	0.021637
AT2G41905	13.2423	23.5798	10.3078	25.2232	21.3586	12.78	24.0092	13.2147	14.5558	33.7781	17.7215	51.4615	39.219	30.4343	64.8101	11.5313	10.7198	29.2958	0.000664245	0.021792
AT3G61260	2557.97	1577.96	1796.64	2859.23	2088.4	1957.47	2156.99	2066.46	1933.28	2328.27	1618.2	3529.18	1760.85	2134.62	3080.44	3639.29	2398.03	3210.6	0.000666608	0.0218212
AT5G54190	477.826	138.649	179.355	492.753	340.552	204.48	158.461	236.214	211.721	91.6833	48.7342	401.761	42.4205	125.119	303.429	131.457	164.014	340.699	0.000667291	0.0218212
AT3G21750	835.368	950.738	947.283	1076.49	1069.12	1049.03	1250.4	1432.97	1271.65	781.721	1000.16	772.825	1007.69	935.008	884.756	832.563	921.907	967.845	0.000670347	0.0218857
AT1G22430	1176.36	1456.29	1175.08	1269.27	1279.15	1103.34	1031.44	1144.73	1001.71	1372.84	1247.15	1078.89	1414.28	1263.02	1164.62	1260.38	1177.04	1076.35	0.000689129	0.0224558
AT1G67860	1203.94	2061.82	2019.29	1420.61	1962.62	2095.92	1217.75	2413.34	2130.44	1034.25	1452.06	1136.67	1225.39	1449.85	1088.02	1012.45	1254.22	910.338	0.000690026	0.0224558
AT4G00740	1500.79	1078.07	1154.47	1246.75	1072.68	1211.97	1260.96	964.676	1171.08	1217.62	1189.56	1467.1	1123.74	1182.71	1470.01	1338.79	1151.31	1508.19	0.000695376	0.0225936
AT5G55910	1543.83	1498.73	1545.13	1581.85	1279.15	1473.96	1708.5	1350.38	1545.56	1741.98	1844.15	2619.12	1689.62	1778.71	2483.41	1771.21	1708.74	2672.42	0.000696509	0.0225941
AT3G04140	656.597	485.744	492.711	599.951	593.296	496.291	626.16	566.582	537.243	541.253	584.81	845.955	570.676	606.149	759.064	600.783	582.088	759.519	0.000698364	0.022618
AT5G57580	1290.02	1448.74	1479.16	1400.79	1713.44	1765.77	1594.21	1635.32	1869.76	1647.08	1665.82	937.141	1573.56	1634.15	1386.54	1571.72	1769.85	1157.72	0.000703747	0.022756
AT4G11900	652.183	770.588	833.898	734.175	1092.85	1206.65	808.63	789.581	1018.91	875.817	691.139	250.085	703.541	802.281	462.509	742.618	865.092	303.808	0.000705933	0.0227903
AT1G18060	2260.02	2010.89	2617.14	2025.06	2373.18	2493.17	1720.02	2504.19	2332.9	1775.76	1937.18	1324.46	1812.88	1875.93	1102.75	2039.89	1895.27	1338.92	0.000709979	0.0228844
AT2G23130	1058.28	448.016	574.142	1296.29	568.377	971.282	539.727	429.479	849.531	390.861	240.348	1534.82	301.746	479.34	581.327	803.734	418.074	1306.37	0.00072002	0.0231712
AT5G59300	486.654	515.926	551.465	623.373	517.354	561.256	734.682	798.666	702.65	530.798	436.392	598.578	607.494	524.146	507.679	616.927	624.967	662.952	0.000721838	0.0231928
AT1G52140	180.978	131.104	117.508	109.901	86.6212	93.7202	97.9576	78.4625	107.184	122.244	166.139	184.178	108.853	116.665	100.161	111.854	122.206	124.778	0.000727028	0.0232856
AT4G29020	2226.91	1857.15	1925.49	2806.98	2513.2	2286.56	1783.4	2028.46	1930.63	2029.1	2091.14	2948.65	2229.08	2171.82	2889.94	2209.4	1921	3265.93	0.000726342	0.0232856
AT4G01740	100.421	98.092	128.847	97.2894	134.085	137.385	103.72	122.236	165.407	139.133	141.772	71.3238	100.849	102.293	67.756	123.385	120.062	79.207	0.000737215	0.0235455
AT4G37450	611.352	357.47	566.927	616.166	498.368	506.941	565.657	327.065	543.859	706.927	621.361	1732.54	530.657	718.587	985.899	856.779	494.185	1779.45	0.000737469	0.0235455
AT5G29000	231.74	299.935	282.433	193.678	302.581	235.366	244.894	303.939	325.521	249.314	292.405	128.202	234.514	205.431	150.242	207.564	201.533	166.009	0.000740423	0.0236026
AT3G02480	13.2423	78.285	74.2159	25.2232	16.6123	12.78	11.5244	33.0369	11.9093	11.2594	66.4557	12.6397	14.407	16.9079	1.96394	0	6.43191	2.17006	0.000743298	0.023657
AT2G29180	516.449	599.87	753.497	506.265	605.162	616.636	450.413	592.186	545.182	560.555	657.911	545.311	555.469	592.623	504.733	600.783	600.311	404.715	0.000749501	0.0237796
AT5G45380	231.74	424.437	263.879	312.587	437.852	676.277	762.533	587.23	607.375	1391.33	694.462	406.275	1005.29	913.873	586.237	1051.66	906.899	567.47	0.00074888	0.0237796
AT4G02660	112.559	126.388	197.909	121.612	149.511	185.31	124.848	225.477	205.105	100.53	129.589	72.2267	119.258	112.438	83.4676	106.088	117.918	94.3974	0.00076058	0.0240934
AT1G04680	2578.94	1122.4	1725.52	2014.25	1822.6	2022.44	2145.46	1426.37	1909.46	1374.45	1446.52	3137.35	1381.47	1979.07	2543.31	2301.66	1517.93	3035.91	0.000764189	0.0241699
AT4G31340	2274.36	1710.95	1818.29	2104.33	1937.7	1831.8	2202.13	1874.02	1863.15	2013.82	1927.22	2233.61	2028.98	1950.33	2302.72	2172.5	1860.97	2268.79	0.000768213	0.0242592
AT5G55520	228.43	183.923	192.755	93.6861	129.338	185.31	84.5124	142.058	183.933	109.377	139.557	108.34	113.655	191.905	53.0265	73.8006	128.638	49.9113	0.000778651	0.0245505
AT1G12640	565.004	462.164	529.819	702.646	621.774	565.516	629.041	516.201	580.91	612.026	538.291	660.874	574.678	503.011	644.173	607.702	581.016	739.989	0.000783593	0.0246679
AT3G12220	8.82819	15.0911	14.4309	5.40497	33.2246	102.24	33.6129	32.2109	89.9815	38.6035	17.7215	3.61133	6.4031	38.8882	9.81971	41.5128	35.3755	4.34011	0.000797443	0.0250293
AT4G18760	360.852	183.923	228.832	338.711	231.385	261.991	290.031	168.488	275.238	240.468	180.538	456.834	195.295	268.836	336.816	340.175	237.981	403.63	0.000797759	0.0250293
AT4G23170	574.936	529.131	758.651	583.736	1215.07	1285.46	1019.91	800.318	1286.21	859.732	612.5	213.971	761.169	684.771	383.951	765.681	663.559	300.553	0.000798782	0.0250293
AT3G57420	559.487	331.061	513.326	497.257	425.986	445.171	572.38	436.912	460.494	395.686	481.804	569.688	387.388	443.833	559.724	521.217	479.177	593.51	0.000805737	0.0251693
AT5G10400	609.145	590.438	661.758	448.612	681.104	640.066	368.782	540.979	547.829	538.036	482.911	439.68	571.477	647.573	511.607	541.973	650.695	332.019	0.000805177	0.0251693
AT1G78070	2837.16	3234.21	2237.81	4281.63	3633.34	2340.88	3938.47	4806.04	2780.16	889.489	1341.3	2689.54	1459.91	1170.87	2273.26	1288.05	1002.31	3035.91	0.000807035	0.025171
AT1G27180	199.738	262.208	283.463	196.38	242.065	283.291	224.726	214.74	301.703	185.779	193.829	161.607	178.486	180.915	118.819	178.736	246.556	158.414	0.000808301	0.0251717
AT1G25450	666.529	356.527	479.311	582.836	441.412	551.671	956.527	365.057	543.859	646.609	547.152	998.534	569.076	564.725	829.766	906.363	608.887	891.893	0.000810933	0.0252149
AT2G30770	69.522	883.771	540.127	30.6281	78.315	232.171	121.967	36.3405	121.74	809.065	1454.27	31.5992	1159.76	323.787	82.4856	282.518	221.901	6.51017	0.000812948	0.0252388
AT2G30060	1415.82	831.896	948.314	1027.84	984.871	968.087	1249.44	866.392	959.362	904.77	975.791	1415.64	976.473	941.771	1178.37	1258.07	894.035	1407.28	0.000820055	0.0254205
AT2G13790	680.874	777.191	869.975	649.497	910.116	1324.86	1045.84	816.01	1308.7	1323.78	1084.34	576.91	915.643	1071.96	653.993	1098.94	1118.08	704.183	0.000824389	0.0255157
AT5G22500	644.458	341.436	295.833	727.869	478.196	286.486	485.947	262.643	303.026	157.631	270.253	286.198	251.322	252.773	357.438	310.193	271.212	302.723	0.000826879	0.0255537
AT2G28520	1048.35	909.238	924.606	1046.76	959.953	974.477	1026.63	888.691	848.208	944.982	948.101	1217.02	926.048	961.215	1074.28	966.326	885.459	1296.61	0.000830316	0.0256208
AT5G43760	2222.5	1481.76	1691.5	2426.83	1762.09	1911.68	2241.5	1498.22	1961.07	2298.52	1782.12	3181.58	2001.77	2274.12	2611.06	3226.47	2152.55	3302.82	0.000837236	0.025795
AT1G20930	154.493	145.252	152.555	91.8844	185.108	142.71	63.3843	130.496	153.498	107.768	109.652	68.6153	129.663	175.842	49.0986	115.313	158.654	58.5915	0.000841604	0.0258117
AT1G72510	1092.49	1064.86	934.914	1319.71	1045.39	1115.06	1172.61	1018.36	1057.28	1509.56	1016.77	2350.07	1247	1235.97	2141.68	1294.97	1217.77	2403.34	0.000839633	0.0258117
AT3G48720	755.914	466.88	639.081	1030.55	781.964	940.397	1154.36	582.275	967.301	940.961	762.025	1250.42	688.333	890.202	1320.75	1813.88	1122.37	1364.97	0.000840584	0.0258117
AT3G58650	171.046	149.024	207.186	100.893	144.764	152.295	82.5917	120.585	127.033	113.398	108.544	46.9473	112.855	106.52	78.5577	80.7194	125.422	39.061	0.000843901	0.025843
AT3G18090	367.474	485.744	442.203	349.521	384.456	389.791	318.842	407.179	449.908	420.617	345.57	278.073	370.579	302.652	247.457	327.49	339.819	286.447	0.000845869	0.0258642
AT1G04540	66.2115	5.65915	16.4924	42.3389	43.9039	39.4051	71.0673	61.9441	54.2536	13.6721	19.9367	34.3077	22.4109	62.5593	54.9904	94.557	90.0467	84.6322	0.000850257	0.0259591
AT1G76800	162.218	79.2282	70.0928	115.306	125.779	59.6401	109.482	150.318	133.649	74.7943	101.899	260.016	86.4419	60.8685	211.124	131.457	117.918	307.063	0.000854677	0.0260263
AT3G14280	205.256	81.1146	76.2774	158.546	73.5687	68.1602	205.519	147.014	111.154	73.1858	28.7975	93.8947	104.851	76.0856	87.3955	78.4131	81.4708	95.4825	0.000855029	0.0260263
AT5G25090	167.736	148.081	139.155	99.9919	177.989	179.985	51.8599	159.403	165.407	73.1858	124.051	44.2388	104.851	145.408	61.8642	72.6474	103.983	35.8059	0.000862258	0.0262069
AT5G22300	175.46	307.481	249.448	216.199	202.907	337.606	737.563	417.916	562.384	955.437	771.994	319.603	1025.3	589.241	574.453	785.284	891.891	569.64	0.000864982	0.0262503
AT1G72880	623.491	458.392	486.526	583.736	537.526	505.876	636.724	438.564	543.859	640.979	525	852.275	544.264	643.346	702.11	785.284	644.263	923.359	0.000872146	0.0264281
AT4G33530	1595.7	1088.44	1285.38	1485.47	1261.35	1321.67	1301.3	1148.86	1262.39	1118.7	1089.87	1611.56	1081.32	1181.02	1376.72	1441.42	1253.15	1532.06	0.000883354	0.0267277
AT5G67450	2.20705	5.65915	16.4924	10.8099	13.0525	21.3	24.9696	24.7776	38.3745	37.7993	24.3671	19.8623	25.6124	38.8882	35.351	11.5313	15.0078	15.1904	0.000886198	0.0267738
AT4G39260	5626.87	7165.43	6318.66	6527.4	6863.25	7808.6	6789.81	7464.68	7897.2	9173.16	8692.41	7395.11	9198.05	9673.02	7748.74	7972.77	8952.14	8030.29	0.000891833	0.0269039
AT2G18960	12306.5	10660	11159.2	12524.2	11863.5	12010	13792.8	12412.8	12219	12252.6	11852.4	12297.5	12135.5	11807.6	12960.1	11996.1	12295.7	13135.3	0.000898314	0.0270591
AT4G10030	589.282	396.141	478.28	540.497	555.325	483.511	581.983	540.153	480.342	529.19	363.291	930.821	469.027	437.915	826.82	478.551	479.177	1047.05	0.000903211	0.0271661
AT3G05330	147.872	152.797	170.078	127.918	150.697	191.7	102.759	142.058	174.67	125.461	155.063	66.8097	118.457	180.915	122.746	89.9445	161.87	96.5675	0.000907737	0.0272617
AT5G23870	355.335	182.979	243.263	429.695	225.452	286.486	384.147	153.621	350.663	336.172	252.532	428.846	229.711	366.902	356.456	407.056	418.074	482.837	0.000910801	0.0273132
AT2G37420	192.013	182.979	216.463	135.124	173.242	211.935	122.927	135.451	186.579	181.758	208.228	77.6437	184.089	160.625	105.071	146.448	144.718	67.2717	0.000915837	0.0273831
AT3G02120	153.39	150.911	218.524	66.6613	168.496	191.7	87.3935	144.536	93.9513	86.0537	115.19	69.5182	130.463	160.625	37.3149	89.9445	171.518	49.9113	0.000915221	0.0273831
AT5G19240	398.372	434.812	639.081	314.389	937.407	1099.08	919.073	591.36	1151.23	1440.39	1190.66	557.048	1232.6	1131.99	684.434	1192.34	950.851	660.782	0.00092165	0.0275163
AT5G10610	327.747	388.595	347.371	341.414	372.59	440.911	387.029	422.046	434.028	291.939	320.095	223	304.948	327.168	224.871	354.012	361.259	258.237	0.000924673	0.0275659
AT2G41770	547.348	393.311	547.342	565.72	530.406	590.011	658.813	389.009	481.666	467.263	443.038	771.922	402.595	482.721	663.813	580.026	539.208	711.778	0.000927818	0.027619
AT1G54440	488.861	650.803	551.465	537.794	624.147	666.692	721.237	757.37	692.064	582.27	591.456	420.72	613.097	578.251	504.733	482.01	531.704	457.882	0.000932994	0.0276797
AT3G05490	388.441	246.173	297.894	303.579	257.49	346.126	277.547	147.84	276.561	258.161	250.316	574.202	247.32	331.395	399.662	378.228	274.428	635.826	0.000933558	0.0276797
AT5G63700	464.584	592.325	565.896	492.753	550.578	596.401	438.888	624.397	539.889	529.19	469.62	416.206	584.283	545.28	446.797	539.667	487.753	474.157	0.00093396	0.0276797
AT2G38620	50.7621	92.4329	54.6311	37.8348	55.7698	51.1201	46.0977	66.0737	74.1024	32.1696	59.8101	34.3077	68.8333	62.5593	47.1346	33.4409	27.8716	19.5305	0.000946172	0.0280006
AT1G56120	174.357	389.538	250.479	195.48	505.488	674.147	540.688	385.705	562.384	668.323	364.399	77.6437	351.37	496.247	190.502	456.641	433.082	95.4825	0.000950346	0.0280831
AT1G59970	238.361	130.161	177.293	192.777	159.003	162.945	368.782	179.225	260.682	185.779	228.165	276.267	243.318	184.296	219.962	244.464	212.253	286.447	0.000958171	0.028273
AT1G17060	101.524	57.5347	70.0928	65.7604	35.5977	55.3801	31.6922	29.7332	47.6373	77.207	56.4873	63.1983	36.8178	42.2698	49.0986	62.2692	83.6148	73.7819	0.000965907	0.0284598
AT4G13554	13.2423	25.4662	43.2926	9.90911	14.2391	24.4951	5.76221	7.43329	10.5861	23.323	24.3671	3.61133	14.407	25.3619	22.5853	9.22507	10.7198	6.51017	0.000972934	0.0286252
AT5G44610	22.0705	0	0	16.2149	0	0	9.60369	4.12961	0	1.60848	4.43038	18.0567	0	1.69079	5.89183	4.61254	2.14397	17.3604	0.000976925	0.0287009
AT1G04430	2876.89	1725.1	2799.59	3014.17	2311.48	2905.33	2990.59	2286.98	2810.6	2198.79	2078.96	4570.14	2188.26	2478.7	3483.05	2850.55	2132.18	4526.74	0.000991272	0.0290802
AT1G33990	1110.15	1023.36	1033.87	1266.56	1137.94	1201.32	1386.77	1247.14	1233.28	1260.24	1314.72	1333.48	1270.22	1142.98	1158.73	1318.03	1360.35	1425.73	0.000994084	0.0291205
AT1G65710	72.8326	79.2282	59.785	43.2397	80.6882	80.9402	13.4452	54.5108	39.6977	46.6459	39.8734	30.6963	43.2209	52.4146	26.5132	36.9003	36.4475	10.8503	0.00100324	0.0292263
AT3G03470	705.152	777.191	555.588	1703.47	825.868	643.261	1569.24	1223.19	920.987	1007.71	822.943	869.428	1090.93	906.265	1176.4	1128.92	1123.44	972.185	0.00100255	0.0292263
AT4G38260	264.846	347.095	376.233	342.315	382.082	423.871	436.968	417.916	477.696	402.924	437.5	236.542	348.969	327.168	293.609	359.778	409.498	260.407	0.00100286	0.0292263
AT5G10180	6352.99	4427.35	6008.39	4178.04	4811.63	4916.05	4040.27	4270.01	4230.45	2992.58	3800.16	3083.18	3170.34	4177.95	3218.9	2832.1	2761.43	2629.02	0.00100347	0.0292263
AT5G56190	503.207	542.336	482.403	675.621	468.704	506.941	643.447	541.804	463.14	542.862	515.032	622.052	501.843	503.856	588.201	600.783	598.168	760.605	0.00100605	0.0292594
AT1G65486	38.6233	109.41	90.7083	30.6281	68.8223	122.475	49.9392	34.6887	70.1327	287.918	222.627	167.024	235.314	269.681	163.989	146.448	242.269	108.503	0.00101127	0.0293091
AT4G00290	375.198	394.254	377.264	335.108	505.488	480.316	427.364	469.949	489.605	386.839	412.025	285.295	345.767	399.027	279.862	369.003	401.994	256.067	0.0010096	0.0293091
AT5G45350	1999.59	3798.24	2917.1	2021.46	2720.85	2922.37	2146.42	3465.57	2896.61	2485.91	3331.65	2285.97	2718.12	2553.94	2222.2	1955.72	2444.13	1968.24	0.00101211	0.0293091
AT5G47610	102.628	101.865	46.3849	172.058	123.406	76.6802	145.016	119.759	82.042	169.695	114.082	220.291	120.859	133.573	278.88	206.411	209.037	195.305	0.0010171	0.0293698
AT5G56780	126.905	132.047	104.108	89.182	91.3675	95.8502	61.4636	47.9034	67.4861	120.636	119.62	176.052	112.054	117.51	128.638	142.989	90.0467	167.094	0.00101601	0.0293698
AT1G21080	763.639	780.963	743.189	1071.99	796.203	877.562	997.823	791.233	938.19	769.657	660.127	1061.73	803.589	728.731	937.783	812.96	777.189	1184.85	0.0010256	0.0295544
AT2G32100	472.308	310.31	343.248	672.918	329.872	336.541	372.623	213.914	288.47	658.672	429.747	654.554	473.029	553.734	979.026	663.052	462.025	546.854	0.00102642	0.0295544
AT4G23510	39.7269	1.88638	2.06155	10.8099	0	0	0	0	0	0	0	0	0.800388	0	1.96394	9.22507	4.28794	4.34011	0.00104297	0.0299457
AT5G65140	238.361	233.912	126.785	251.331	194.601	126.735	313.08	260.165	109.83	102.138	224.842	395.441	167.281	131.036	268.078	122.232	133.998	296.213	0.00104265	0.0299457
AT4G18570	1144.35	1017.7	1163.75	1316.11	1028.77	1125.71	1136.12	899.428	1077.13	1306.09	1232.75	1998.87	1118.94	1152.27	1683.1	1391.83	1092.35	1892.29	0.00105074	0.0301262
AT1G08470	397.269	284.844	345.31	385.554	312.074	346.126	572.38	331.194	363.896	310.437	421.994	437.874	352.971	326.323	412.428	327.49	332.315	367.824	0.0010558	0.0302283
AT4G37980	5290.3	4485.82	5651.74	8242.58	6113.32	5775.51	7634.93	7292.06	6300.03	5312	5508.07	5498.25	5918.07	5680.22	6255.16	4803.96	5764.06	6152.11	0.00106304	0.0303928
AT1G52530	8.82819	33.0117	16.4924	9.00828	18.9855	27.6901	7.68295	22.2999	10.5861	14.4763	9.96836	6.31983	28.814	23.6711	13.7476	25.3689	15.0078	10.8503	0.0010754	0.0307028
AT3G15550	161.115	199.014	187.601	130.62	173.242	192.765	64.3447	132.973	172.023	131.895	152.848	145.356	126.461	137.8	66.7741	113.007	155.438	46.6562	0.00108066	0.0307662
AT5G07390	27.5881	4.71596	4.1231	5.40497	2.37318	1.065	3.84147	1.65184	0	0	0	14.4453	1.60078	0	1.96394	2.30627	0	2.17006	0.00107985	0.0307662
AT1G52780	897.165	898.862	985.422	927.853	1232.87	1509.11	1305.14	1112.52	1368.25	1187.86	1106.49	687.959	1070.92	1048.29	693.272	1160.05	1154.53	793.155	0.00108451	0.0307892
AT3G17680	141.251	157.513	135.032	102.694	151.884	165.075	53.7806	144.536	103.214	110.985	86.3924	52.3643	100.849	157.244	51.0625	94.557	92.1907	58.5915	0.0010832	0.0307892
AT3G55420	356.438	217.877	187.601	253.133	185.108	219.39	364.94	189.962	197.165	230.013	233.703	373.773	238.515	260.382	284.772	325.184	222.973	335.274	0.00108886	0.0308693
AT1G25490	1789.92	1582.68	1746.13	1977.32	1675.47	1686.96	1692.17	1466.01	1576	1734.75	1748.89	1953.73	1618.38	1744.05	2031.7	1961.48	1764.49	2059.38	0.00109221	0.0309209
AT2G40600	740.465	624.393	833.898	852.183	995.55	1153.4	1008.39	916.773	1209.46	939.352	815.19	552.534	817.996	877.521	591.147	821.031	847.94	647.762	0.00110421	0.0311736
AT5G43810	1157.6	1610.03	1347.22	1233.23	1337.29	1185.35	992.061	1286.79	1190.93	1151.67	1057.75	817.967	1186.17	1155.66	923.053	904.057	1024.82	907.083	0.00110315	0.0311736
AT4G15390	119.181	35.8413	20.6155	88.2811	21.3586	2.13	7.68295	29.7332	10.5861	28.9526	7.75317	127.299	65.6318	23.6711	15.7115	13.8376	4.28794	112.843	0.00110666	0.0311991
AT5G64740	7404.65	5346.01	7021.65	7558.85	6432.51	6480.54	7149.94	6100.26	7525.37	5869.34	6497.15	12534.9	6014.11	6955.92	9944.42	6846.16	5801.58	12912.9	0.00111602	0.0314194
AT3G23490	1272.36	1209.17	1234.87	1542.22	1305.25	1298.24	1486.65	1371.86	1296.79	1237.73	1118.67	1428.28	1251.81	1163.26	1373.78	1205.03	1313.18	1498.42	0.00112124	0.0315223
AT3G51720	310.09	278.242	322.633	182.868	296.648	291.811	126.769	251.906	217.014	179.345	182.753	169.733	191.293	202.05	106.053	186.808	196.173	101.993	0.00112763	0.0316581
AT2G19830	1835.16	1540.23	1761.6	2029.57	1976.86	1885.05	2147.38	1944.22	1799.63	1824.82	1838.61	2220.07	1945.74	1712.77	2069.01	2126.38	1826.66	2426.12	0.00114206	0.0320189
AT3G22960	5494.45	4179.29	4512.74	5113.1	4926.73	4711.57	4971.83	4886.98	4598.32	4752.25	4483.54	8910.06	4350.91	5168.75	7277.39	5539.66	5032.97	9164.15	0.00117504	0.0328979
AT1G08990	22.0705	4.71596	1.03078	14.4132	2.37318	2.13	3.84147	5.78145	2.64652	0	0	1.80567	0	0	0	0	0	17.3604	0.00118843	0.033152
AT1G76930	1249.19	1081.84	365.925	681.927	677.544	312.046	828.798	853.177	460.494	870.992	987.975	1329.87	830.802	822.57	897.522	1705.49	812.564	967.845	0.00118903	0.033152
AT3G50950	2422.24	2509.84	3007.8	2584.48	3696.23	4240.84	3109.67	3083.99	3993.59	3287.73	2864.24	1581.76	2467.59	2656.23	2398.96	2894.37	2885.78	1908.56	0.00118756	0.033152
AT5G41460	687.496	464.051	538.065	572.026	526.847	502.681	822.076	587.23	537.243	328.13	489.557	459.542	569.876	503.011	553.832	355.165	321.595	477.412	0.00119256	0.0332046
AT1G23790	60.6938	98.092	136.062	72.0662	91.3675	115.02	39.3751	99.9365	92.628	45.0374	67.5633	45.1417	76.8372	78.6218	43.2067	65.7286	78.2549	10.8503	0.0011994	0.0333331
AT5G49555	894.958	1016.76	1036.96	955.778	1016.91	1091.63	997.823	1101.78	1177.7	900.749	915.981	483.919	857.215	930.781	630.426	780.672	824.356	458.967	0.00120046	0.0333331
AT1G04425	69.522	99.9784	77.3082	31.529	86.6212	69.2252	28.8111	75.9848	59.5466	23.323	44.3038	21.668	56.0271	49.033	39.2789	47.2785	27.8716	19.5305	0.0012055	0.033427
AT2G04070	8.82819	1.88638	10.3078	21.6199	29.6648	48.9901	28.8111	16.5184	38.3745	51.4713	33.2279	18.9595	60.8295	55.7961	34.369	20.7564	34.3035	33.6359	0.00122328	0.0337813
AT4G32350	273.674	240.514	235.017	268.447	243.251	214.065	197.836	163.532	175.993	292.743	204.905	387.315	200.097	281.517	256.295	289.437	308.732	442.691	0.00122214	0.0337813
AT5G22460	529.692	230.139	429.834	626.976	283.595	339.736	384.147	322.109	271.268	184.171	345.57	260.919	243.318	279.826	388.861	156.826	328.027	316.828	0.00122054	0.0337813
AT2G40030	357.542	518.756	416.433	380.149	510.234	375.946	332.288	385.705	465.787	369.146	427.532	226.611	367.378	360.984	245.493	394.372	409.498	246.301	0.00123547	0.0340251
AT3G08890	180.978	116.013	91.7391	202.686	144.764	133.125	213.202	192.44	109.83	141.546	138.449	175.15	148.072	175.842	229.781	241.005	213.325	214.836	0.00123482	0.0340251
AT5G51600	270.363	228.253	251.509	154.942	191.041	291.811	123.888	156.925	202.458	127.874	183.861	146.259	147.271	233.329	98.1971	136.07	211.181	60.7616	0.00123863	0.0340658
AT5G45840	125.802	131.104	78.339	126.116	102.047	70.2902	130.61	88.3736	64.8396	119.027	108.544	120.98	120.859	79.4672	114.891	115.313	72.895	121.523	0.0012468	0.0342439
AT1G58602	4181.25	4461.3	5717.71	4352.8	6138.24	8053.55	6859.91	5613.79	8152.59	10728.6	9381.33	7191.07	7618.09	8374.49	7824.35	9185.87	9734.69	8684.56	0.00125142	0.034294
AT1G73830	348.714	85.8305	115.447	223.405	75.9419	76.6802	211.281	47.9034	55.5768	256.552	186.076	195.012	155.275	296.734	348.6	184.501	270.14	249.556	0.0012554	0.034294
AT2G36630	750.396	576.291	552.496	853.084	607.535	545.281	672.258	522.808	651.043	1022.19	909.336	4645.98	938.855	889.357	1802.9	919.048	702.15	4654.77	0.00125377	0.034294
AT5G25100	3143.94	2175.95	2677.96	2970.03	2500.15	2650.79	2837.89	2277.07	2826.48	2460.97	2467.72	3614.94	2486	2704.42	3343.61	3000.45	2409.82	3574.08	0.00125528	0.034294
AT1G05470	282.502	295.219	231.925	210.794	240.878	199.155	157.5	259.339	218.337	267.812	273.576	186.886	227.31	211.349	182.647	215.636	169.374	137.799	0.00127076	0.0345476
AT1G10090	1146.56	973.375	939.037	1414.3	1323.05	1009.62	1595.17	1296.7	1152.56	1068.03	960.285	901.93	990.88	979.814	975.098	1172.74	1000.16	1229.34	0.00126937	0.0345476
AT1G76980	143.458	113.183	86.5852	90.0828	90.181	89.4602	159.421	206.48	111.154	107.768	90.8228	85.7692	100.849	69.3225	68.738	99.1695	62.1751	96.5675	0.00127478	0.0345476
AT2G41240	24.2775	1538.35	333.971	0	0	87.3302	0	0	55.5768	357.082	2977.22	0	1011.69	140.336	7.85577	0	0	0	0.00126676	0.0345476
AT4G28790	28.6916	218.821	79.3697	24.3224	66.4491	124.605	44.177	56.1627	47.6373	73.9901	111.867	6.31983	166.481	82.8488	80.5217	69.188	64.3191	28.2107	0.00127587	0.0345476
AT5G26220	26.4846	606.473	82.4621	41.4381	118.659	64.9651	53.7806	80.9403	157.468	73.1858	108.544	62.2955	177.686	53.2599	33.387	47.2785	91.1187	32.5508	0.00127663	0.0345476
AT5G65890	427.064	404.63	331.91	416.182	511.421	353.581	345.733	382.402	263.328	298.373	315.665	438.777	396.192	325.477	400.644	273.293	239.053	372.165	0.00127319	0.0345476
AT4G24972	271.467	257.492	237.078	320.695	266.983	249.211	300.595	366.709	247.449	320.892	302.373	623.858	388.988	344.922	755.136	350.553	283.004	634.741	0.00128083	0.0346148
AT5G56100	90.489	70.7394	68.0312	156.744	87.8078	51.1201	69.1465	64.4219	37.0512	125.461	37.6582	133.619	92.845	82.8488	206.214	160.286	157.582	148.649	0.00129273	0.03489
AT1G04250	644.458	348.038	417.464	423.389	422.427	380.206	457.135	412.961	407.563	305.611	397.627	765.603	454.62	362.675	604.894	362.084	385.915	667.292	0.00130891	0.0352796
AT2G40300	495.482	113.183	112.355	560.315	473.45	317.371	611.755	735.07	516.07	361.908	93.038	1202.57	178.486	489.484	800.307	870.616	718.23	1570.04	0.00131376	0.0353633
AT1G17430	152.286	109.41	169.047	147.736	275.289	283.291	198.796	192.44	362.573	172.912	122.943	105.631	140.868	242.629	134.53	269.833	225.117	123.693	0.00131867	0.0354483
AT3G53760	180.978	210.332	212.34	119.81	153.07	140.58	176.708	216.391	156.144	171.303	181.646	129.105	190.492	154.707	107.035	114.16	152.222	95.4825	0.00134075	0.0359464
AT5G01040	37.5198	0	6.18466	29.7273	4.74637	0	17.2866	9.08514	13.2326	10.4551	4.43038	46.0445	1.60078	0	9.81971	100.323	8.57588	32.5508	0.00133906	0.0359464
AT5G01740	64.0044	67.9099	53.6003	45.0414	18.9855	25.5601	63.3843	22.2999	43.6675	105.355	199.367	138.133	139.267	120.892	123.728	55.3504	85.7588	68.3568	0.00134693	0.0360643
AT4G38520	1836.26	1474.21	1688.41	1926.87	1381.19	1717.85	1828.54	1300.83	1691.12	1465.32	1737.82	1544.75	1453.5	1656.13	1613.38	1480.62	1633.7	1783.79	0.00135225	0.0361588
AT4G28250	1255.81	1453.46	1154.47	531.488	1287.45	871.172	749.088	1124.08	722.499	751.16	1526.27	496.558	1614.38	1115.92	672.65	525.829	743.957	546.854	0.00136713	0.0365085
AT3G06050	1794.33	1843	2030.63	1767.42	1885.49	1940.43	2019.66	2180.43	2172.79	1939.02	1803.16	1271.19	2087.41	2046.7	1615.34	1871.54	1957.44	1516.87	0.00138015	0.0367591
AT4G10630	47.4515	44.33	70.0928	34.2315	51.0234	57.5101	20.1677	30.5591	31.7582	36.1908	60.9177	40.6275	36.8178	38.0428	29.4591	25.3689	17.1518	24.9556	0.00137856	0.0367591
AT4G27720	1298.85	817.748	1211.16	1238.64	1046.57	1018.14	1254.24	954.765	1119.48	817.912	824.051	2022.35	906.039	1052.52	1433.68	1165.82	865.092	1789.21	0.00138363	0.0368033
AT1G47655	55.1762	18.8638	41.231	23.4215	16.6123	19.17	14.4055	26.4295	21.1721	20.9102	16.6139	12.6397	51.2248	60.0231	51.0625	39.2066	34.3035	36.8909	0.00138642	0.0368292
AT4G35510	261.535	230.139	259.756	300.877	244.438	210.87	327.486	288.247	312.289	227.6	244.779	344.882	249.721	231.639	334.852	243.311	247.628	330.933	0.00138911	0.0368523
AT5G06530	1320.92	2840.9	2844.94	1507.09	1540.2	3001.18	1544.27	1639.45	2765.61	1615.72	1902.85	1272.99	1303.83	1534.39	1275.58	1508.3	1396.8	1203.3	0.00139287	0.0369037
AT1G20970	1528.38	1148.81	1457.52	1682.75	1441.71	1557.03	1566.36	1351.21	1692.45	1290.8	1211.71	1541.14	1087.73	1313.75	1437.61	1518.68	1480.41	1604.76	0.00139938	0.0370114
AT1G76040	285.813	284.844	315.417	153.141	245.624	281.161	285.229	276.684	350.663	348.236	426.424	202.235	351.37	296.734	203.268	207.564	241.197	219.176	0.00140059	0.0370114
AT1G29860	17.6564	10.3751	2.06155	3.60331	0	0	7.68295	6.60737	1.32326	16.0848	0	7.22267	19.2093	10.1448	25.5313	3.4594	4.28794	4.34011	0.00140923	0.0371911
AT1G34355	78.3502	99.9784	92.7698	54.0497	112.726	149.1	42.2562	92.5032	74.1024	69.1646	62.0253	63.1983	92.845	111.592	54.9904	72.6474	108.27	47.7412	0.00142955	0.037467
AT1G65610	26.4846	0	0	14.4132	2.37318	0	36.494	10.737	0	6.43392	0	12.6397	1.60078	1.69079	0	2.30627	0	10.8503	0.00142713	0.037467
AT3G08720	108.145	156.57	99.9853	118.008	137.645	145.905	276.586	175.921	279.207	296.764	293.513	205.846	307.349	205.431	187.557	269.833	362.331	218.091	0.00142292	0.037467
AT3G14620	727.222	1134.66	1088.5	641.389	1211.51	1633.71	1782.44	1414.8	1594.53	2136.87	2380.22	631.08	2155.44	1613.02	981.971	1391.83	1715.18	1098.05	0.0014236	0.037467
AT3G59400	4665.7	3413.41	4105.58	4859.07	4360.72	3851.05	3468.85	3843.01	3310.79	3755	3606.33	8075.84	3079.09	4144.98	6370.05	4455.71	3844.14	7704.78	0.00143079	0.037467
AT4G37760	1533.9	1212	1490.5	1743.1	1599.53	1365.33	1651.83	1656.8	1255.77	1067.23	1246.04	2583.91	1294.23	1090.56	2151.5	1293.82	1133.09	2300.26	0.00142682	0.037467
AT1G10550	17.6564	0	6.18466	18.0166	0	8.52002	7.68295	1.65184	21.1721	3.21696	12.1835	41.5303	3.20155	10.1448	19.6394	35.7472	36.4475	41.2311	0.00143927	0.0375918
AT4G35880	433.685	412.175	475.188	365.736	399.881	450.496	363.019	355.972	396.977	332.955	448.576	323.214	377.783	392.264	331.906	282.518	394.49	271.257	0.00143909	0.0375918
AT1G75410	922.546	806.43	787.513	999.919	931.474	880.757	972.853	748.285	775.429	1003.69	1026.74	1110.48	944.457	833.56	1005.54	928.273	965.858	1025.35	0.00144285	0.0376369
AT3G14980	594.8	751.724	775.143	708.051	684.663	725.267	524.361	656.608	644.426	640.175	532.753	422.526	610.696	566.415	460.545	441.65	537.064	392.78	0.00144821	0.037728
AT3G54750	371.888	331.061	362.833	300.877	351.231	350.386	248.735	308.895	271.268	308.828	346.677	239.251	336.163	371.974	273.97	246.771	307.66	188.795	0.00146265	0.0380552
AT4G21980	619.077	465.937	522.603	712.555	556.511	576.166	830.719	662.389	590.173	569.402	458.544	554.34	507.446	541.053	569.543	674.583	658.199	634.741	0.00147212	0.0382523
AT2G16600	10918.3	11012.7	12060.1	9978.47	11645.2	13178.3	12755.6	12582.9	13685.1	9368.59	10176.6	5206.64	10211.3	10350.2	6672.5	8171.11	10114.2	5541.24	0.00148176	0.0384376
AT5G05270	599.214	1213.89	1123.55	231.513	506.675	574.036	411.038	718.552	480.342	232.425	613.608	278.975	676.327	305.188	468.4	131.457	172.59	270.172	0.00148304	0.0384376
AT4G02330	275.881	66.0235	159.77	225.207	131.712	249.211	288.111	62.77	242.156	153.61	118.513	184.178	103.25	160.625	192.466	133.764	170.446	253.897	0.00148851	0.0385299
AT5G02270	325.54	263.151	294.802	309.885	271.729	264.121	350.535	284.117	296.41	217.949	293.513	514.615	244.118	220.648	298.519	222.555	168.302	355.889	0.00149225	0.0385775
AT1G29440	230.637	108.467	132.97	306.281	179.175	149.1	259.3	106.544	131.002	221.97	131.804	277.17	185.69	196.132	159.079	251.383	222.973	314.658	0.00150017	0.0387327
AT1G48210	344.3	367.845	413.341	336.009	374.963	549.541	416.8	436.087	563.708	462.438	450.791	323.214	381.785	446.369	397.698	377.075	394.49	329.848	0.00152894	0.0394252
AT1G68890	1700.53	1798.67	1796.64	1675.54	1896.17	1600.7	1147.64	1523.83	1523.07	1309.3	1326.9	1228.76	1339.85	1420.27	1251.03	1401.06	1418.24	1102.39	0.00154844	0.0397992
AT2G27080	54.0727	3.77277	22.6771	18.0166	4.74637	23.4301	30.7318	1.65184	17.2023	22.5187	13.2911	85.7692	25.6124	33.8158	43.2067	13.8376	8.57588	95.4825	0.00154934	0.0397992
AT3G61420	911.511	938.476	790.605	1059.37	846.04	812.597	895.064	856.481	829.682	858.124	821.836	941.655	757.967	706.751	817	840.635	844.724	1016.67	0.00154576	0.0397992
AT1G18980	100.421	3.77277	0	88.2811	26.105	8.52002	8.64332	21.474	0	0	2.21519	29.7935	1.60078	1.69079	3.92789	6.9188	0	13.0203	0.00158075	0.0405546
AT5G53850	1856.13	1870.35	2145.04	1989.93	1944.82	2145.98	1769.96	1955.78	2089.42	2156.97	2220.73	1919.42	2041.79	2145.62	1801.92	1949.95	2196.5	1874.93	0.00159235	0.0408005
AT4G23230	64.0044	57.5347	90.7083	59.4546	119.846	192.765	132.531	104.066	157.468	237.251	171.677	50.5587	156.076	145.408	43.2067	138.376	130.782	66.1867	0.00161834	0.041414
AT5G62920	99.3172	10.3751	28.8617	19.8182	26.105	21.3	31.6922	24.7776	22.4954	6.43392	24.3671	306.963	20.8101	16.9079	45.1707	83.0257	51.4553	132.373	0.00162174	0.0414485
AT2G32487	41.9339	105.638	80.4005	35.1323	66.4491	55.3801	24.9696	81.7662	80.7187	66.7519	89.7152	48.753	108.853	59.1777	39.2789	43.8191	83.6148	45.5712	0.00162541	0.04149
AT1G16090	110.352	138.649	121.632	94.5869	130.525	121.41	105.641	111.499	150.851	242.076	150.633	99.3117	239.316	112.438	82.4856	115.313	103.983	72.6969	0.0016358	0.0415979
AT2G32240	1533.9	939.42	824.621	1160.27	1059.63	910.577	1413.66	911.817	1070.52	2337.93	1892.88	2204.72	1575.16	1414.35	1614.36	2167.89	1868.47	2104.95	0.00163427	0.0415979
AT2G43290	484.447	340.492	453.541	520.679	282.409	539.956	508.035	194.092	460.494	334.564	330.063	719.558	385.787	349.149	546.958	355.165	292.652	665.122	0.00163338	0.0415979
AT2G34070	227.326	182.979	152.555	179.265	166.123	170.4	239.132	128.844	117.77	168.89	228.165	337.66	179.287	252.773	290.664	170.664	149.006	392.78	0.00164072	0.0416706
AT1G11330	875.095	1276.14	1274.04	755.795	1387.13	1889.31	1742.11	1227.32	2028.55	1502.32	1294.78	587.744	1261.41	1123.53	905.378	1263.83	1410.73	753.009	0.00165195	0.0419032
AT1G23950	574.936	576.291	478.28	698.142	560.071	582.556	642.487	692.122	621.931	722.207	606.962	854.08	677.928	634.892	872.973	695.34	574.584	858.257	0.0016619	0.0419848
AT2G38360	356.438	265.98	346.341	374.744	326.313	356.776	395.672	251.08	344.047	271.833	307.911	594.967	315.353	323.787	399.662	298.662	307.66	475.242	0.00166554	0.0419848
AT4G25170	856.335	864.907	640.112	1032.35	849.6	796.622	812.472	914.295	741.024	918.442	731.013	992.214	847.61	785.373	793.433	1136.99	1053.76	1003.65	0.00165783	0.0419848
AT5G08200	322.229	291.446	284.494	378.348	323.939	346.126	377.425	279.161	285.824	336.976	310.127	414.4	295.343	282.362	360.384	272.14	263.708	486.092	0.00166392	0.0419848
AT5G24580	214.084	96.2056	114.416	155.843	169.683	137.385	160.382	115.629	148.205	119.832	93.038	383.704	128.062	155.553	317.177	172.97	143.646	275.597	0.00166476	0.0419848
AT4G12000	160.011	167.888	140.186	160.347	188.668	113.955	243.934	246.951	138.942	122.244	139.557	174.247	136.066	98.9113	177.737	115.313	69.679	175.775	0.00167344	0.0421315
AT1G67195	436.996	394.254	292.74	361.232	325.126	266.251	450.413	371.665	293.763	427.051	516.139	518.226	520.252	415.935	504.733	327.49	308.732	522.983	0.00168068	0.042209
AT5G43580	79.4537	32.0685	6.18466	64.8596	33.2246	14.91	147.897	53.6849	15.8791	4.82544	11.076	21.668	9.60465	21.9803	25.5313	41.5128	8.57588	32.5508	0.00168012	0.042209
AT5G63320	1019.66	1316.7	1273.01	1022.44	1167.61	1148.07	1186.06	1245.49	1161.82	1961.54	1494.15	1219.73	1629.59	1350.94	1234.34	1637.45	1579.03	1267.31	0.00168594	0.0422884
AT1G75990	598.11	508.381	554.557	667.513	503.115	667.757	562.776	526.112	506.808	462.438	490.665	634.692	459.422	478.494	618.642	430.119	494.185	578.32	0.00169189	0.0423851
AT5G39120	13.2423	19.807	4.1231	1.80166	9.49273	0	3.84147	1.65184	0	4.82544	0	1.80567	4.00194	0	1.96394	2.30627	0	0	0.00172584	0.0431822
AT3G28070	632.319	720.599	617.435	799.935	754.672	608.116	722.197	683.863	459.17	946.59	953.639	1470.72	871.622	825.106	1630.07	889.066	829.716	1574.38	0.00173743	0.0434185
AT2G39210	164.425	192.411	276.248	154.942	397.508	490.966	384.147	271.728	395.654	905.574	642.405	497.461	647.514	549.507	402.608	679.196	633.543	366.739	0.00174514	0.0435039
AT4G11290	333.264	112.24	86.5852	74.7687	78.315	74.5502	265.062	78.4625	120.416	271.833	299.051	408.081	220.907	290.816	457.599	577.72	389.13	340.699	0.00174372	0.0435039
AT1G71110	75.0396	171.661	155.647	90.0828	116.286	138.45	78.7502	118.933	92.628	161.652	119.62	86.672	158.477	177.533	99.1791	104.935	83.6148	104.163	0.00176731	0.0439573
AT5G23910	204.152	147.138	202.032	126.116	179.175	213	77.7899	138.755	168.054	95.7045	165.032	120.98	137.667	197.823	90.3414	113.007	105.055	45.5712	0.00176784	0.0439573
AT5G55120	747.086	916.783	777.205	663.009	716.701	631.546	648.249	826.747	599.436	1011.73	847.31	667.194	926.048	844.551	576.417	809.5	852.228	614.126	0.00176984	0.0439573
AT1G67865	3881.09	4296.24	4417.91	3773.57	4742.81	4488.99	2731.29	3426.75	3249.92	3063.35	4216.61	4281.24	2524.42	3898.12	3388.78	2684.5	3078.74	2751.63	0.00178789	0.0441386
AT1G70850	909.304	230.139	99.9853	160.347	72.3821	39.4051	140.214	114.803	11.9093	79.6197	64.2405	233.834	110.453	104.829	15.7115	106.088	77.1829	316.828	0.00178805	0.0441386
AT2G14610	0	0	0	1.80166	0	6.39001	235.29	8.25921	10.5861	104.551	39.8734	9.02833	62.4302	164.852	4.90986	64.5755	102.911	17.3604	0.00178357	0.0441386
AT2G25480	503.207	489.517	592.696	424.29	425.986	476.056	401.434	346.887	412.856	403.728	354.43	399.955	380.184	436.224	442.869	419.741	474.889	431.841	0.00178543	0.0441386
AT3G46550	942.41	708.338	838.021	962.985	776.031	837.092	865.292	764.803	722.499	877.426	807.437	1296.47	785.981	861.459	889.666	880.994	735.382	1139.28	0.00178281	0.0441386
AT1G69490	205.256	118.842	51.5388	428.794	129.338	124.605	437.928	244.473	97.9211	496.216	194.937	207.652	326.558	243.474	800.307	379.381	642.119	491.518	0.00179585	0.0442772
AT1G06690	1286.71	1336.5	1603.89	1178.28	1334.92	1464.38	1136.12	1330.56	1329.87	944.982	1220.57	984.991	1102.13	1016.17	870.027	923.66	1055.91	847.407	0.0018043	0.0444314
AT1G56190	4862.13	4101	5879.55	4636.56	4976.56	6018.33	4509.89	4989.39	5465.05	4479.62	5018.51	3551.75	4583.82	4858.49	3343.61	4755.52	4717.81	3451.47	0.00180925	0.0444993
AT5G51710	358.645	175.434	237.078	325.199	299.021	347.191	398.553	351.843	310.966	183.367	188.291	278.975	248.12	266.3	312.267	324.031	245.485	326.593	0.00181658	0.0446252
AT3G48540	23.174	38.6709	37.1079	16.2149	51.0234	59.6401	12.4848	33.8628	27.7884	25.7357	21.0443	11.7368	27.2132	28.7435	23.5673	21.9095	25.7276	11.9353	0.00183543	0.0450337
AT1G27090	2098.9	1640.21	1803.86	2356.57	1969.74	1978.77	1959.15	1862.45	2060.31	2249.46	1998.1	2935.11	1973.76	2079.67	2897.8	2869	2399.1	2966.47	0.00183954	0.0450747
AT5G38970	57.3833	41.5005	41.231	28.8265	47.4637	61.7701	23.0488	14.0407	23.8186	93.2918	117.405	94.7975	86.4419	87.9212	106.053	43.8191	39.6634	82.4621	0.00184156	0.0450747
AT3G08570	97.1101	68.853	55.6619	68.4629	59.3296	46.8601	113.324	83.4181	72.7792	28.9526	46.519	45.1417	79.2384	77.7764	84.4495	66.8818	38.5915	41.2311	0.00185014	0.0452301
AT1G75370	1955.44	1611.92	1945.07	2452.05	2021.95	1912.74	2148.34	2173.83	1970.33	1543.34	1561.71	2066.59	1669.61	1541.16	2153.46	1454.1	1596.19	2426.12	0.0018537	0.0452625
AT5G13700	46.348	19.807	12.3693	23.4215	14.2391	18.105	34.5733	11.5629	14.5558	15.2806	36.5506	47.8502	18.4089	27.8981	43.2067	24.2158	42.8794	47.7412	0.0018783	0.0458078
AT5G52920	2813.99	2366.47	2318.22	2780.86	2593.89	2442.05	2227.09	2394.35	2207.19	2530.14	2284.97	6020.99	2232.28	2529.42	4499.39	3013.14	2614.57	5656.25	0.00188221	0.045848
AT4G39350	5081.73	3969.9	4840.52	5335.6	4955.21	4625.31	5009.28	4421.98	4952.95	4859.22	5282.12	7204.61	4867.16	5167.91	6391.65	4677.11	4731.74	7614.73	0.00192216	0.0467649
AT3G23670	289.123	285.787	295.833	172.058	322.753	315.241	103.72	271.728	226.277	179.345	220.411	192.303	254.523	228.257	99.1791	161.439	222.973	80.2921	0.00192988	0.0468402
AT4G21790	1312.09	1145.98	1070.98	1301.7	1294.57	1094.82	1457.84	1358.64	1058.61	1306.89	1298.1	1565.51	1484.72	1265.56	1490.63	1339.94	1387.15	1606.93	0.00192965	0.0468402
AT1G13470	90.489	79.2282	80.4005	70.2646	213.586	417.481	272.745	161.055	382.421	313.654	172.785	26.1822	247.32	309.415	86.4135	307.887	219.757	75.9519	0.00193316	0.0468634
AT1G63500	787.916	604.586	712.266	871.101	665.678	895.667	744.286	569.06	713.236	706.123	793.038	900.125	666.723	664.481	806.199	900.598	769.685	887.553	0.00194788	0.0471638
AT4G24000	17.6564	71.6826	12.3693	23.4215	4.74637	10.65	124.848	95.8069	25.1419	65.1434	17.7215	10.834	59.2287	21.9803	19.6394	55.3504	36.4475	15.1904	0.00195213	0.0472102
AT1G10760	11899.3	11523	13609.3	18680.5	13847.5	12531.9	15571.4	15358.8	14281.9	11664.7	10246.4	13400.8	11596.8	11827.9	17322	11838.1	13355.9	16910.2	0.00196216	0.0473079
AT1G27200	580.454	683.815	491.68	862.092	567.191	532.501	736.603	857.306	538.566	334.564	328.956	375.579	385.787	377.047	730.587	303.274	328.027	461.137	0.00195999	0.0473079
AT2G25680	87.1784	48.1028	57.7235	72.0662	55.7698	58.5751	51.8599	51.2071	39.6977	32.1696	43.1962	231.125	57.6279	28.7435	68.738	58.8098	42.8794	173.604	0.00196544	0.0473079
AT3G12920	440.306	415.005	353.556	486.447	353.604	433.456	411.038	346.887	317.582	385.231	414.241	614.829	353.771	423.543	481.166	488.929	435.226	546.854	0.00196891	0.0473079
AT3G18773	72.8326	48.1028	87.616	75.6695	62.8894	52.1851	48.0184	39.6442	46.314	130.287	109.652	160.704	136.866	169.079	369.221	137.223	94.3347	141.054	0.00197019	0.0473079
AT4G21650	1356.23	1345.94	1327.64	874.704	1291.01	972.347	712.594	1244.66	864.087	702.101	1704.59	481.21	952.461	1131.14	762.01	471.632	662.487	456.797	0.00196971	0.0473079
AT4G33580	1178.56	946.022	1180.24	1299.89	1058.44	1116.12	1136.12	943.202	1050.67	941.765	915.981	2409.66	1071.72	998.413	1504.38	1267.29	1049.47	2199.35	0.00198428	0.0475899
AT1G08090	2234.64	5.65915	18.554	301.777	8.30614	6.39001	5.76221	146.188	5.29303	16.0848	0	33.4048	11.2054	3.38158	13.7476	78.4131	8.57588	32.5508	0.00198986	0.0476108
AT3G04760	1178.56	1543.06	1690.47	1390.88	1447.64	1655.01	1209.1	1328.08	1480.73	1336.65	1260.44	1263.97	1231	1210.61	931.891	1556.73	1333.55	1112.15	0.00198957	0.0476108
AT1G49320	108.145	74.5122	30.9233	18.0166	28.4782	8.52002	39.3751	31.385	7.93955	12.8678	33.2279	43.336	8.00388	23.6711	52.0445	34.594	19.2957	49.9113	0.0019992	0.0477778
AT5G56120	158.907	154.684	156.678	105.397	161.376	228.976	95.0765	105.718	178.64	114.202	146.203	95.7003	168.081	142.027	62.8462	106.088	121.134	43.4011	0.00200343	0.0478223
AT2G34585	654.39	526.301	701.958	699.943	576.683	798.752	825.917	729.289	766.166	576.64	676.741	784.562	598.69	612.067	758.082	634.224	678.566	758.434	0.00201138	0.0479557
AT1G15910	487.758	545.165	505.08	394.563	552.952	527.176	391.83	477.383	576.94	463.242	578.165	402.664	467.426	574.869	454.653	413.975	564.936	354.804	0.00201978	0.0480429
AT1G21910	64.0044	9.43192	10.3078	54.0497	7.11955	14.91	7.68295	11.5629	18.5256	25.7357	11.076	63.1983	22.4109	42.2698	71.6839	25.3689	25.7276	56.4214	0.00201845	0.0480429
AT2G01970	1842.89	1782.63	1796.64	1934.98	1597.15	1730.63	2067.67	1722.05	1851.24	1643.06	1741.14	2097.28	1827.28	1750.82	2035.63	1691.65	1561.88	1991.03	0.00203307	0.0482998
AT3G25980	169.943	192.411	186.57	105.397	220.706	183.18	90.2747	166.01	175.993	139.133	137.342	128.202	167.281	209.658	66.7741	161.439	154.366	67.2717	0.00203536	0.0482998
AT3G23530	1262.43	1131.83	1392.58	1328.72	1683.77	1963.86	1055.45	1352.86	1913.43	1323.78	1202.85	1159.24	989.279	1399.13	835.658	1554.42	1303.53	937.464	0.00203785	0.0483024
AT3G55360	1663.01	1410.07	1497.72	1760.22	1649.36	1693.35	1912.09	1513.91	1741.41	1386.51	1500.79	2184.86	1531.14	1470.99	1772.46	1614.39	1408.59	2254.69	0.00205106	0.0485585
AT5G03995	52.9692	52.8188	92.7698	36.0331	43.9039	69.2252	22.0885	18.1703	38.3745	61.9265	49.8418	42.4332	54.4264	60.8685	55.9724	34.594	51.4553	60.7616	0.00205858	0.0486796
AT1G74020	257.121	163.172	119.57	262.141	177.989	150.165	448.492	210.61	162.761	168.086	138.449	240.154	156.076	204.586	159.079	295.202	228.333	243.046	0.00206707	0.0488233
AT1G53070	241.672	175.434	213.371	133.323	154.257	176.79	128.689	213.088	198.489	110.181	189.399	75.838	241.717	224.03	117.837	121.079	140.43	92.2274	0.00208085	0.0490917
AT3G18680	1580.25	1668.51	1636.87	1521.5	1471.37	1552.77	1196.62	1428.84	1348.4	1542.53	1510.76	1300.08	1571.16	1708.55	1404.22	1743.54	1696.95	1278.16	0.00209647	0.0494026
AT3G50340	699.634	231.082	194.817	784.621	227.826	247.081	648.249	171.792	242.156	177.737	275.791	232.028	280.136	241.783	237.637	197.186	225.117	338.529	0.00210797	0.0495581
AT5G27150	1587.97	1621.35	1402.89	1783.64	1389.5	1332.32	1491.45	1402.41	1439.7	1215.21	1487.5	2147.84	1273.42	1280.77	2147.57	1447.18	1270.3	2291.58	0.00210718	0.0495581
AT1G17500	745.982	820.577	800.913	773.811	872.145	932.942	1025.67	1019.19	1042.73	811.478	748.734	564.271	794.785	798.054	582.309	756.456	885.459	504.538	0.0021142	0.0496469
AT3G06070	241.672	83.0009	74.2159	326.1	149.511	152.295	172.866	65.2478	115.123	439.115	141.772	668.097	167.281	389.728	772.812	660.746	462.025	447.031	0.00212081	0.0497443
AT2G33570	487.758	275.412	494.772	487.348	421.24	530.371	454.254	333.672	500.191	502.65	469.62	1278.41	407.397	605.304	846.459	653.827	542.424	1257.55	0.00212394	0.0497602
AT5G01790	417.132	400.857	428.803	575.629	428.36	426.001	635.764	476.557	437.998	262.182	394.304	573.299	400.194	316.178	531.247	329.796	242.269	579.405	0.00212648	0.0497621
AT4G31910	121.388	53.762	10.3078	14.4132	11.8659	19.17	6.72258	28.0813	15.8791	57.9053	80.8544	85.7692	67.2326	64.2501	47.1346	14.9907	23.5837	26.0407	0.00213585	0.0499237
AT2G28790	548.452	830.953	628.773	248.628	569.564	584.686	255.458	581.449	411.533	195.43	385.443	205.846	234.514	397.336	266.114	305.581	211.181	158.414	0.00213926	0.0499457

## Sheet: Pathogen infection
	mock-treated									infected
Gene ID	-Fe #1	-Fe #2	-Fe #3	suf #1	suf #2	suf #3	+Fe #1	+Fe #2	+Fe #3	-Fe #1	-Fe #2	-Fe #3	suf #1	suf #2	suf #3	+Fe #1	+Fe #2	+Fe #3	P	adjusted P
AT4G30650	3184.77	3005.95	3884.99	4658.18	4318.01	4058.72	3911.58	4240.28	3751.44	725.424	1042.25	916.376	1114.94	1203.84	960.368	601.936	902.611	1043.8	1.32142e-80	2.67483e-76
AT1G65845	46.348	21.6934	28.8617	43.2397	30.8514	34.0801	32.6525	23.1258	31.7582	269.42	132.911	350.299	140.868	166.543	196.394	258.302	257.276	295.128	1.91861e-53	1.94182e-49
AT3G05650	619.077	662.121	684.435	751.29	1047.76	977.672	915.231	1083.61	1089.04	309.632	425.317	296.129	363.376	374.51	265.132	258.302	411.642	326.593	1.39486e-47	9.41161e-44
AT1G18330	328.85	318.799	292.74	344.116	325.126	289.681	322.684	286.595	291.117	610.418	536.076	649.137	571.477	635.738	691.308	660.746	573.512	601.105	7.39482e-47	3.74215e-43
AT4G39250	0	0	0	0	0	2.13	0	0	0	174.52	36.5506	162.51	62.4302	84.5396	125.692	83.0257	131.854	147.564	8.30849e-43	3.02092e-39
AT5G02240	4187.87	3935.94	4735.38	4185.25	4468.7	4585.9	4126.7	4981.96	4795.49	2754.52	2996.04	2542.38	3255.18	3261.54	2766.21	2331.64	2840.76	2235.16	8.95441e-43	3.02092e-39
AT1G22690	192.013	245.23	129.878	189.174	276.476	174.66	274.665	181.703	272.591	1296.43	675.633	1031.94	656.318	808.199	843.513	1910.74	1484.7	1155.55	2.16518e-42	5.47846e-39
AT1G64890	497.689	424.437	448.388	560.315	477.01	444.106	540.688	549.238	480.342	170.499	221.519	249.182	244.919	231.639	280.844	205.258	173.662	258.237	1.94284e-42	5.47846e-39
AT1G62380	5440.37	2799.4	3167.57	4469.01	3184.81	3455.93	4265	2471.98	3698.5	6772.5	5968.83	11784.7	4894.37	6046.27	9955.23	8481.3	7805.12	10763.5	2.05551e-40	4.62306e-37
AT2G30520	5062.97	3895.38	3798.41	4814.02	3830.32	3646.57	3885.65	2930.37	3485.46	7445.65	6438.45	9243.21	5281.76	6086.85	8529.4	7444.63	5871.26	8072.61	1.72296e-39	3.48761e-36
AT1G68050	115.87	156.57	84.5236	222.504	132.898	141.645	112.363	189.962	132.326	16.0848	17.7215	7.22267	22.4109	25.3619	25.5313	25.3689	25.7276	26.0407	1.07994e-34	1.98729e-31
AT2G21660	15363.3	16975.6	16838.8	19780.4	16968.3	19116.8	17053.3	19496.7	21631.3	8861.92	8695.73	9150.21	8173.56	11357.9	9918.89	7856.3	10284.6	10465.1	1.56921e-34	2.64699e-31
AT1G19350	3154.98	1664.73	2221.32	3312.34	1657.67	1881.86	2937.77	1581.64	1893.58	2178.69	2941.77	3395.56	2024.98	2706.11	4426.73	2106.78	2522.38	4690.58	1.83952e-34	2.8405e-31
AT5G24110	2.20705	7.54554	0	0	4.74637	2.13	5.76221	8.25921	5.29303	157.631	95.2532	45.1417	136.066	60.8685	23.5673	57.6567	69.679	19.5305	1.96458e-34	2.8405e-31
AT4G35770	152.286	41.5005	26.8002	236.918	73.5687	68.1602	134.452	85.0699	47.6373	369.146	175	6665.62	230.512	371.974	3094.19	907.517	784.693	7167.69	9.80787e-34	1.32354e-30
AT3G16670	569.419	454.619	396.849	186.471	569.564	426.001	266.022	263.469	545.182	3541.07	1781.01	3728.7	1837.69	2302.01	2621.86	4172.04	3194.51	4156.74	9.82184e-33	1.24259e-29
AT2G47890	649.976	678.155	750.405	832.365	781.964	813.662	1094.82	1258.7	1123.45	443.94	429.747	378.287	551.467	483.567	456.617	437.038	590.664	505.623	6.70094e-31	7.97885e-28
AT5G13180	1509.62	1291.23	1057.58	1615.18	1194.9	1219.43	1555.8	1085.26	1157.85	1620.54	1728.96	2560.43	1788.87	1628.23	2080.8	1866.92	2004.61	2456.5	8.03183e-30	9.03224e-27
AT4G02520	1840.68	2442.87	1672.95	1436.82	2004.15	3182.23	6208.78	1801.33	4327.05	19088.6	15115.3	14008.4	13923.5	9706.84	13183.9	17413.5	16393.9	19233.2	1.4839e-29	1.5809e-26
AT5G10450	6034.07	5043.25	4957	6476.95	5482.05	5020.42	6262.56	5659.21	5143.5	7042.73	6494.94	8407.18	6534.36	6554.36	7631.88	8573.55	7620.74	8459.96	3.12765e-29	3.1655e-26
AT4G16146	567.211	382.936	522.603	1000.82	517.354	605.986	713.554	618.615	627.224	59.5137	127.373	213.971	163.279	186.833	179.701	108.395	195.101	349.379	6.30444e-29	6.07688e-26
AT1G79460	1053.87	902.635	1003.98	1036.85	1018.1	880.757	856.649	999.365	824.389	369.95	457.437	566.076	495.44	507.238	463.491	413.975	445.946	500.198	7.54367e-29	6.94086e-26
AT3G16770	1509.62	1271.42	748.343	2271.89	1177.1	822.182	1535.63	1148.86	1100.95	2247.85	2271.68	6596.1	1597.57	2566.62	6037.16	4549.11	5367.43	6979.98	1.60968e-28	1.41666e-25
AT2G12400	886.13	626.28	762.774	976.497	588.549	621.961	861.451	744.155	657.659	373.167	431.962	562.465	422.605	391.418	512.589	372.462	303.372	448.117	6.61117e-28	5.57597e-25
AT3G50970	368.577	737.577	406.126	471.133	313.26	293.941	507.075	824.27	308.319	16.0848	87.5	51.4615	32.0155	15.2171	29.4591	29.9815	27.8716	60.7616	2.38293e-27	1.92941e-24
AT2G41190	627.905	751.724	613.312	1175.58	609.908	504.811	697.228	1099.3	423.442	143.959	213.766	156.19	214.504	145.408	180.683	119.926	124.35	154.074	3.64594e-27	2.8385e-24
AT3G02380	364.163	492.346	375.202	352.224	329.872	324.826	232.409	324.587	271.268	929.701	897.152	836.024	771.574	591.777	995.719	720.709	613.175	603.275	8.2285e-27	6.16894e-24
AT1G68440	239.465	188.638	239.14	227.009	188.668	244.951	233.37	157.751	275.238	723.816	558.228	734.003	456.221	586.705	908.324	680.349	507.049	671.632	9.22951e-27	6.67228e-24
AT4G33220	2015.04	1283.68	1411.13	2154.78	1584.1	1669.92	2248.22	1322.3	1599.82	2464.19	2174.21	4462.7	2175.45	2493.92	3670.61	4078.64	2815.03	4295.63	1.82602e-26	1.27456e-23
AT5G55930	102.628	355.584	191.724	117.108	159.003	295.006	386.068	275.032	373.159	2078.96	1175.16	860.4	1068.52	1097.32	1083.11	1178.5	1626.2	1116.49	1.12564e-25	7.59505e-23
AT4G05320	28955.4	31212.1	27556.8	30712.8	30076.5	31531.5	37974.9	33771.1	34308.1	47672.9	43381.2	44378.8	41976.3	43335.8	44902.6	42610.6	45845.6	48274	1.19676e-25	7.81445e-23
AT2G37130	334.368	198.07	134.001	369.339	220.706	193.83	311.159	229.606	158.791	536.428	259.177	913.667	254.523	437.07	772.812	921.354	603.527	1151.21	1.9344e-25	1.22363e-22
AT5G17890	709.566	763.986	750.405	750.39	814.002	780.647	859.53	753.24	770.136	1389.73	1202.85	1143.89	1103.73	1198.77	1036.96	1285.74	1252.08	1297.69	4.7867e-25	2.93614e-22
AT3G16660	292.434	403.686	312.325	125.215	287.155	276.901	230.488	272.554	301.703	1120.31	925.949	1261.26	699.539	1001.79	1049.73	823.338	1011.95	1421.39	2.25835e-24	1.3061e-21
AT3G27250	567.211	870.567	494.772	1062.08	935.034	413.221	809.591	1284.31	501.515	72.3816	127.373	63.1983	272.932	92.9936	147.296	69.188	110.414	145.394	2.20099e-24	1.3061e-21
AT4G30910	288.02	255.605	247.386	244.124	264.61	263.056	259.3	234.562	333.461	583.074	579.272	481.21	505.845	461.586	464.473	638.836	500.617	527.324	2.49775e-24	1.40443e-21
AT5G15960	229.533	117.899	125.755	386.455	195.788	117.15	168.065	378.272	88.6583	4.0212	17.7215	23.4737	15.2074	5.91777	29.4591	10.3782	12.8638	35.8059	9.67339e-24	5.29213e-21
AT3G62150	147.872	246.173	176.263	143.232	182.735	199.155	310.199	135.451	344.047	1992.91	1047.78	520.032	979.674	1070.27	736.479	1823.1	1461.12	590.255	2.62979e-23	1.40085e-20
AT3G57400	973.308	818.691	808.128	1062.08	961.139	894.602	1217.75	686.341	951.422	1583.55	1386.71	1925.74	1411.88	1268.94	2221.22	1526.75	1331.41	2124.48	3.41532e-23	1.77264e-20
AT1G21050	134.63	152.797	92.7698	119.81	110.353	149.1	177.668	148.666	125.709	588.704	378.798	296.129	431.409	346.612	321.105	372.462	382.699	312.488	9.82131e-23	4.84885e-20
AT2G45960	20524.4	15600.4	14083.5	21303.7	16005.9	13782.2	18414.1	15941.1	14236.9	17976.4	18332.9	29052.3	17876.7	17742.3	24377.4	23121.5	18894.8	26338	9.80317e-23	4.84885e-20
AT3G05660	503.207	553.654	672.066	664.811	974.192	947.852	678.981	930.813	1029.49	275.05	173.892	224.805	287.339	280.671	287.718	269.833	316.236	439.436	1.8057e-22	8.70262e-20
AT5G48300	7984	8343.48	10924.2	8303.83	9855.83	11035.6	8891.09	10213.3	11083.6	7555.83	8738.93	6110.38	8580.95	8409.15	6473.16	7008.75	7774.03	6288.82	4.79106e-22	2.25536e-19
AT1G76990	1240.36	1877.9	2370.78	1251.25	1649.36	2504.89	1834.3	1383.42	2762.96	7088.57	4881.17	4071.78	4911.98	4870.33	5504.93	5831.4	5562.53	5077.93	7.93588e-22	3.64429e-19
AT1G78290	240.568	203.73	175.232	182.868	173.242	181.05	247.775	166.836	160.114	345.019	447.468	425.234	357.773	327.168	521.427	359.778	286.22	499.113	8.10162e-22	3.64429e-19
AT3G05880	1733.64	1117.68	1215.28	2316.03	1244.73	1017.08	1448.24	1301.65	891.876	287.114	458.544	1082.5	364.977	433.688	793.433	599.63	412.714	882.128	1.53734e-21	6.76497e-19
AT5G17460	593.696	697.019	573.111	1017.03	586.176	474.991	839.362	1107.56	493.575	59.5137	156.171	193.206	110.453	87.0758	260.222	83.0257	79.3269	254.982	1.77712e-21	7.65374e-19
AT1G01430	1582.45	919.613	1222.5	1762.92	1223.38	1142.75	1435.75	970.458	1077.13	1659.95	1274.84	2489.11	1379.87	1530.17	2407.79	2067.57	1613.34	2721.25	2.49381e-21	1.05166e-18
AT2G47390	3660.39	2906.92	3904.58	3787.98	3916.94	4031.03	3334.4	3873.57	3998.88	2394.22	2555.22	2217.36	2598.06	2629.18	2363.61	2283.21	2692.83	2389.23	3.07754e-21	1.27134e-18
AT2G17840	1985.24	1779.8	1459.58	2839.41	1823.79	1798.79	2742.81	2957.62	1939.9	893.51	1062.18	1501.41	1068.52	999.258	1355.12	1116.23	1019.46	1814.17	3.58881e-21	1.45289e-18
AT4G30440	2980.62	1761.88	1795.61	3229.47	1787.01	2259.94	2704.4	1896.32	2207.19	2227.74	2230.7	4263.18	2028.18	2643.55	3975.02	2903.59	2512.73	4192.55	5.62205e-21	2.2314e-18
AT2G47560	26.4846	8.48873	12.3693	19.8182	18.9855	8.52002	10.5641	3.30369	13.2326	49.0586	43.1962	102.923	40.0194	49.033	107.035	29.9815	37.5195	101.993	7.39966e-21	2.88046e-18
AT1G13930	23028.3	19213.8	21581.4	30348.9	22213	19716.4	24434.7	26148.7	19347.3	10800.1	11190	17202.6	12036.2	12157.6	15869.6	13054.6	13112.5	19559.8	8.25681e-21	3.15348e-18
AT3G53420	18438.8	11363.6	12185.8	17740	13807.2	11724.6	13258.8	11466.3	10406.1	16067.1	14944.8	28512.4	15088.9	15275.5	23059.6	21170.4	14506.1	25742.3	8.42058e-21	3.15647e-18
AT5G25110	217.394	362.186	212.34	300.877	275.289	194.895	356.297	365.883	308.319	53.0798	99.6836	65.004	192.093	150.48	125.692	47.2785	72.895	71.6118	1.09605e-20	4.03385e-18
AT3G10420	2881.3	2718.28	2280.08	3937.52	2964.11	2811.61	4052.76	3747.21	3200.96	3668.94	3574.21	4552.99	3548.12	2981.71	4285.32	3696.95	3593.29	4467.06	1.58056e-20	5.71316e-18
AT2G21650	37.5198	20.7502	12.3693	18.0166	52.21	40.4701	44.177	39.6442	44.9908	734.271	93.038	1330.78	384.186	535.981	640.245	1081.64	980.866	1147.96	1.96313e-20	6.94147e-18
AT5G43745	978.826	1160.13	1027.68	944.068	1066.75	1000.04	956.527	1083.61	1030.82	759.202	822.943	658.165	773.174	670.399	600.967	748.384	809.349	639.081	1.98896e-20	6.94147e-18
AT1G14200	160.011	123.558	148.432	129.719	118.659	106.5	200.717	134.625	165.407	387.644	342.247	344.882	196.895	334.777	270.042	281.365	302.3	318.998	2.24243e-20	7.57486e-18
AT1G20440	6798.81	4614.1	4159.18	9727.14	5043.01	3876.61	8039.25	6949.3	5004.56	2663.64	2852.06	6237.67	2712.51	3023.98	6682.32	3450.18	3558.99	6850.87	2.24529e-20	7.57486e-18
AT5G64120	90.489	102.808	73.1851	72.0662	87.8078	34.0801	151.738	93.3291	51.607	530.798	358.861	1552.87	213.703	666.172	367.257	641.143	830.788	697.673	3.1256e-20	1.03719e-17
AT5G62210	126.905	139.592	213.371	154.942	160.19	182.115	116.205	248.602	199.812	57.9053	100.791	46.9473	80.8391	81.158	60.8822	36.9003	55.7432	45.5712	4.53691e-20	1.48123e-17
AT4G30350	317.815	379.163	389.633	369.339	427.173	480.316	418.721	399.746	542.536	233.23	224.842	189.595	209.702	273.063	174.791	313.652	304.444	185.54	6.47553e-20	2.0806e-17
AT1G71860	675.357	601.757	651.45	627.877	670.424	580.426	659.773	596.315	613.992	919.246	879.43	947.975	820.397	847.932	893.594	921.354	898.323	901.658	8.45752e-20	2.67496e-17
AT5G05440	91.5925	37.7277	27.8309	54.0497	9.49273	43.6651	59.5429	28.0813	44.9908	435.898	183.861	288.907	156.076	278.981	416.356	401.291	315.164	301.638	1.07217e-19	3.33889e-17
AT2G03730	515.346	542.336	526.726	563.918	533.966	502.681	701.069	526.938	610.022	861.341	975.791	1180	723.55	961.215	1219.61	1155.44	1019.46	1066.58	1.21982e-19	3.74114e-17
AT1G29395	5325.61	3418.13	4740.54	10124.4	6383.86	5130.12	8265.89	8744.03	6272.24	2433.63	1897.31	3382.92	3011.86	2740.77	4916.73	3324.49	3825.91	5224.41	1.28061e-19	3.81206e-17
AT3G05640	801.159	377.277	630.835	1363.85	1031.15	469.666	613.676	1113.34	498.868	101.334	134.019	160.704	186.49	185.987	145.332	115.313	206.893	126.948	1.26802e-19	3.81206e-17
AT2G38310	312.297	233.912	279.34	150.438	199.347	478.186	197.836	166.01	492.252	1929.37	959.177	1432.8	889.231	1222.44	1281.47	1735.47	1344.27	1558.1	1.54284e-19	4.52611e-17
AT4G01390	412.718	1235.58	1120.45	298.174	923.168	898.862	452.334	753.24	869.38	2047.59	1387.82	1039.16	1754.45	1744.05	1240.23	1436.81	1620.84	892.978	2.01802e-19	5.83553e-17
AT5G17520	824.333	875.283	930.791	959.382	931.474	954.242	860.49	967.154	993.766	509.888	630.222	334.048	641.911	623.057	483.13	456.641	527.417	465.477	2.1587e-19	6.15443e-17
AT2G15970	9061.04	6182.63	7270.06	12884.5	8340.55	7064.16	9982.07	8583.8	6953.72	3712.37	3937.5	7860.07	3630.56	4768.88	7481.64	4905.43	4276.15	8206.07	2.41411e-19	6.787e-17
AT3G54500	3412.1	5002.69	4062.29	3347.48	3686.74	3894.71	3351.69	3998.29	3894.35	7501.95	7335.6	8562.47	6042.13	5550.87	7517.97	7154.04	6515.52	7763.37	2.76578e-19	7.66915e-17
AT3G22060	211.877	194.298	149.463	117.108	223.079	276.901	165.183	119.759	219.661	1232.1	803.006	503.781	605.093	693.225	444.833	954.795	880.1	299.468	3.26417e-19	8.92883e-17
AT3G18280	738.258	520.642	556.619	543.199	543.459	510.136	481.145	565.756	460.494	271.029	297.943	269.044	338.564	324.632	290.664	275.599	243.341	330.933	3.3391e-19	9.01202e-17
AT1G12110	2101.11	1103.54	1199.82	1544.92	1171.17	1460.12	1458.8	1097.65	1578.65	3315.08	2290.51	3334.16	2233.08	2278.34	2614.01	3447.87	2878.28	3970.12	3.52341e-19	9.38433e-17
AT4G11460	0	0	0	0	0	0	0	0	2.64652	43.4289	11.076	28.8907	19.2093	18.5987	23.5673	83.0257	32.1595	26.0407	3.84465e-19	1.01069e-16
AT1G23090	238.361	187.695	183.478	227.909	189.855	263.056	290.992	171.792	378.452	1072.86	696.677	573.299	625.103	718.587	537.138	1047.05	944.419	569.64	5.37043e-19	1.3937e-16
AT4G14560	419.339	197.127	170.078	585.538	218.333	219.39	499.392	249.428	218.337	171.303	158.386	303.352	304.147	183.451	342.708	146.448	137.214	325.508	5.9295e-19	1.5193e-16
AT2G02930	2.20705	9.43192	4.1231	1.80166	7.11955	2.13	10.5641	9.91106	2.64652	97.313	93.038	16.251	60.8295	50.7238	21.6034	84.1788	51.4553	24.9556	7.30567e-19	1.84852e-16
AT5G67190	112.559	79.2282	84.5236	115.306	61.7028	76.6802	97.9576	60.2923	72.7792	201.864	179.43	238.348	164.079	141.181	396.716	168.358	139.358	199.645	8.01872e-19	2.00389e-16
AT4G36010	332.161	433.869	417.464	318.893	372.59	449.431	355.336	441.042	431.382	85.2494	207.12	64.1012	192.093	154.707	121.764	80.7194	70.751	115.013	9.71726e-19	2.39874e-16
AT4G27300	887.233	1361.97	912.237	659.406	1045.39	1094.82	1766.12	843.266	1480.73	5489.74	4088.13	1832.75	4157.21	3475.42	2909.58	3837.63	4168.95	2958.87	1.09089e-18	2.66047e-16
AT1G76080	4333.54	3336.07	4109.7	5087.88	4326.31	4369.7	4194.89	4404.64	4177.52	6551.34	5698.58	7542.27	5705.16	5829.85	6697.05	7429.64	6508.02	6669.67	1.30897e-18	3.11719e-16
AT5G48540	93.7996	101.865	62.8773	53.1488	92.5541	129.93	137.333	61.9441	116.447	645	460.76	350.299	477.831	286.589	217.016	383.994	395.562	307.063	1.30111e-18	3.11719e-16
AT1G04620	423.753	348.038	434.987	360.331	303.767	405.766	297.714	388.183	386.391	168.086	169.462	214.874	199.296	166.543	172.827	156.826	185.453	210.495	1.78568e-18	4.20299e-16
AT4G37520	257.121	320.685	184.509	195.48	210.027	159.75	354.376	210.61	244.803	736.684	517.247	556.145	509.847	581.632	611.768	663.052	657.127	461.137	1.90724e-18	4.43751e-16
AT4G23200	59.5903	42.4437	59.785	47.7439	60.5162	76.6802	84.5124	35.5146	84.6885	186.584	139.557	258.21	177.686	158.089	163.989	260.608	222.973	286.447	2.17904e-18	5.01228e-16
AT5G11150	528.588	387.652	421.587	562.117	353.604	390.856	553.172	432.783	538.566	173.716	262.5	306.963	267.329	238.402	379.041	177.583	260.492	387.355	3.61839e-18	8.2296e-16
AT1G44575	29276.5	25188	35967.9	27559	30636.6	33893.7	25332.6	32604.1	31782	19144.9	23783.4	16820.7	23550.6	21583.8	15119.4	18502	20173.7	14421.1	4.09174e-18	9.20278e-16
AT4G11600	3107.52	3634.12	3339.71	3583.49	3704.54	3526.22	4189.13	5201.65	4209.28	1871.47	2333.7	2063.88	2502.01	2189.58	2233.99	1994.92	2340.14	2724.5	4.26717e-18	9.49187e-16
AT5G67480	759.225	824.35	1329.7	1214.32	765.352	1573.01	1042.96	972.11	1640.84	652.238	660.127	493.85	531.457	674.626	609.804	471.632	696.79	584.83	4.74185e-18	1.04331e-15
AT1G72500	1093.59	971.488	969.96	1005.32	888.757	879.692	1157.24	1062.13	906.431	1454.87	1284.81	1949.22	1186.97	1398.28	1791.12	1254.61	1356.06	2000.79	5.95346e-18	1.29581e-15
AT3G53260	1936.69	1690.2	1890.44	1631.4	1498.67	1482.48	1893.85	1635.32	1468.82	2219.7	2338.13	3228.53	2455.59	1990.91	2878.16	2250.92	2050.71	3015.29	1.03976e-17	2.23902e-15
AT5G19190	930.271	407.459	522.603	1108.02	472.263	479.251	537.806	310.546	426.089	1022.99	686.709	1652.18	709.944	1063.51	2548.22	1541.74	1040.9	1449.6	1.20912e-17	2.57631e-15
AT3G11420	677.564	627.223	551.465	799.034	719.074	608.116	722.197	972.11	678.831	302.394	347.785	363.842	417.802	421.007	331.906	299.815	350.539	404.715	1.26194e-17	2.66085e-15
AT1G28660	225.119	199.957	197.909	193.678	161.376	276.901	276.586	118.933	215.691	560.555	410.918	752.06	302.546	519.073	817	482.01	450.234	864.767	1.53465e-17	3.20252e-15
AT1G58360	1914.61	2645.65	2591.37	2371.88	2331.65	2231.18	2115.69	3088.95	2417.59	934.527	1388.92	1247.72	1233.4	1120.15	1152.83	752.997	954.066	1234.76	2.10676e-17	4.35154e-15
AT1G68710	407.2	348.038	443.234	413.48	410.561	489.901	509.956	472.427	506.808	275.854	279.114	240.154	296.944	269.681	227.817	281.365	309.804	256.067	2.25157e-17	4.60367e-15
AT1G28010	90.489	67.9099	38.1387	83.777	37.9709	45.7951	97.9576	46.2516	68.8094	158.435	86.3924	278.073	99.2481	134.418	186.575	183.348	211.181	250.641	3.07687e-17	6.22821e-15
AT2G37170	3045.73	972.431	1127.67	2016.95	1396.62	1120.38	1549.07	1105.91	1005.68	1673.62	1524.05	3335.97	1359.86	1424.49	2168.19	2008.76	1505.07	3193.24	3.16709e-17	6.34735e-15
AT3G51910	19.8634	20.7502	16.4924	18.0166	21.3586	8.52002	16.3263	11.5629	11.9093	122.244	55.3798	69.5182	43.2209	56.6415	115.873	116.467	78.2549	77.037	3.47683e-17	6.83282e-15
AT4G37610	25.3811	16.9775	5.15388	9.90911	10.6793	2.13	7.68295	5.78145	10.5861	106.16	36.5506	147.162	38.4186	65.9409	626.498	164.898	71.823	99.8226	3.46458e-17	6.83282e-15
AT1G65310	160.011	14.1479	37.1079	189.174	49.8368	8.52002	57.6221	21.474	30.4349	73.9901	39.8734	594.967	40.0194	108.211	437.959	197.186	109.342	493.688	3.60337e-17	7.0134e-15
AT4G35230	843.093	784.736	763.805	850.382	753.486	758.282	838.402	768.933	809.834	1097.79	1048.89	1171.88	900.436	1079.57	1098.83	1188.88	1134.16	1176.17	3.64133e-17	7.01979e-15
AT3G29670	161.115	171.661	130.909	95.4878	107.98	84.1352	91.235	110.673	105.861	394.882	250.316	332.243	271.331	275.599	413.41	196.033	363.403	273.427	4.9308e-17	9.41596e-15
AT4G18270	1051.66	1155.41	1125.61	1136.84	1206.76	946.787	905.628	1386.72	1003.03	426.247	513.924	592.259	479.432	417.626	537.138	327.49	414.858	644.507	5.0233e-17	9.50295e-15
AT5G10170	273.674	252.776	261.817	138.727	253.931	266.251	159.421	235.388	305.672	712.556	461.867	744.837	550.667	543.59	613.732	678.043	682.854	609.786	5.86745e-17	1.09971e-14
AT4G19430	8.82819	71.6826	63.9081	64.8596	33.2246	41.5351	32.6525	39.6442	82.042	515.518	374.367	250.085	316.953	397.336	500.805	175.276	466.313	381.93	7.57612e-17	1.40693e-14
AT2G02010	24.2775	64.1371	49.4772	18.0166	40.3441	61.7701	166.144	186.658	162.761	246.097	283.544	119.174	155.275	106.52	84.4495	227.167	129.71	80.2921	1.1259e-16	2.07186e-14
AT3G24500	154.493	168.831	127.816	194.579	149.511	120.345	239.132	208.132	170.7	376.384	386.551	384.607	394.591	347.458	319.141	260.608	273.356	479.582	1.21664e-16	2.21866e-14
AT1G28670	665.425	494.233	743.189	767.505	615.841	652.846	686.664	464.168	705.296	1207.97	980.222	1390.36	1049.31	1080.42	1291.29	1335.33	1025.89	1432.24	1.43052e-16	2.58541e-14
AT2G32240	1533.9	939.42	824.621	1160.27	1059.63	910.577	1413.66	911.817	1070.52	2337.93	1892.88	2204.72	1575.16	1414.35	1614.36	2167.89	1868.47	2104.95	1.7238e-16	3.08788e-14
AT1G49720	749.293	898.862	782.359	1070.18	866.212	732.722	990.14	881.258	811.157	509.084	489.557	420.72	480.233	453.132	531.247	478.551	558.504	460.052	1.93067e-16	3.42813e-14
AT1G09350	591.489	496.119	316.448	672.918	557.698	438.781	680.901	837.484	694.71	46.6459	104.114	279.878	140.868	104.829	278.88	169.511	144.718	286.447	1.96771e-16	3.46351e-14
AT1G11545	634.526	178.263	256.663	483.745	321.566	358.906	407.196	212.262	314.935	336.976	315.665	1403	248.921	543.59	1013.39	582.333	484.537	1354.11	2.57103e-16	4.48645e-14
AT4G00360	5132.49	3330.41	4147.84	6616.58	4475.82	4772.28	7410.2	4015.63	4946.34	6473.33	5806.01	9815.6	5268.95	5814.63	8502.89	8489.37	5389.94	10289.3	2.78696e-16	4.82167e-14
AT1G65486	38.6233	109.41	90.7083	30.6281	68.8223	122.475	49.9392	34.6887	70.1327	287.918	222.627	167.024	235.314	269.681	163.989	146.448	242.269	108.503	2.8591e-16	4.86335e-14
AT4G33550	325.54	377.277	652.481	245.926	236.132	373.816	189.193	630.178	292.44	32.1696	127.373	10.834	119.258	63.4047	13.7476	16.1439	60.0311	15.1904	2.83888e-16	4.86335e-14
AT1G09070	1371.68	1546.84	1335.89	1272.87	1103.53	1609.22	2062.87	1633.67	1720.23	3072.2	2430.06	2405.15	2798.15	2605.51	3452.61	2991.23	2663.88	2455.42	3.32852e-16	5.61466e-14
AT3G02870	1663.01	1367.63	1602.86	1625.09	1598.34	1421.78	1385.81	1670.01	1292.82	961.067	970.253	1086.11	1040.5	992.495	998.665	1030.9	890.819	1030.78	3.56602e-16	5.96558e-14
AT1G52750	108.145	49.046	65.9697	72.9671	18.9855	31.9501	43.2166	31.385	31.7582	61.1222	60.9177	231.125	64.031	72.7041	155.151	138.376	88.9747	188.795	3.75671e-16	6.23305e-14
AT4G23940	1463.27	1417.62	1505.96	1264.76	1502.22	1539.99	917.152	1430.5	1306.06	923.267	993.513	790.882	1030.1	1150.58	790.487	900.598	981.938	801.836	3.90285e-16	6.42288e-14
AT4G21380	588.178	617.791	1096.75	626.976	1542.57	1789.2	1068.89	1132.34	1577.32	764.832	770.886	185.984	524.254	670.399	262.186	629.611	607.815	298.383	4.32127e-16	7.05413e-14
AT2G37640	1316.5	777.191	624.65	1255.75	988.431	775.322	940.201	816.01	717.206	981.173	1127.53	1663.02	1137.35	1276.55	1897.17	1104.7	1212.41	1585.23	5.17766e-16	8.3845e-14
AT3G63310	669.839	522.529	496.834	636.885	590.923	646.456	812.472	550.064	824.389	1335.84	1104.27	1065.34	999.684	1028	1116.5	1178.5	1043.04	1230.42	8.0165e-16	1.28786e-13
AT3G16530	151.183	336.72	121.632	160.347	271.729	208.74	1301.3	152.795	490.929	12246.2	7357.75	2239.03	6484.74	3418.78	2445.11	11608.6	7076.17	2700.63	8.68712e-16	1.3846e-13
AT2G04170	329.954	318.799	465.911	277.455	418.867	400.441	205.519	426.175	329.491	199.451	165.032	112.854	126.461	230.793	143.368	149.907	196.173	84.6322	8.88756e-16	1.40548e-13
AT1G16390	143.458	51.8756	121.632	59.4546	110.353	100.11	101.799	62.77	100.568	340.193	272.468	427.943	195.295	298.425	539.102	443.957	323.739	383.015	9.38176e-16	1.47214e-13
AT1G04040	880.612	347.095	541.157	797.233	415.307	685.862	759.652	275.032	602.082	1132.37	732.12	3066.02	727.552	1215.68	2200.6	2632.61	1214.56	2819.99	9.99419e-16	1.55617e-13
AT2G42600	16030.9	12592.6	17117.1	15085.3	16338.2	15704.5	13060.1	14776.6	14901.2	9962.12	10953	9423.77	10345.8	9686.55	9685.18	11236.1	10230	9401.77	1.0165e-15	1.57069e-13
AT1G12845	402.786	358.413	378.295	635.984	614.654	391.921	367.821	602.097	463.14	197.843	222.627	151.676	237.715	242.629	174.791	193.727	241.197	164.924	1.05576e-15	1.61899e-13
AT5G02940	3319.4	5012.12	5570.31	4984.28	5039.45	4446.39	4863.31	5668.3	4426.3	2475.45	3457.91	1419.25	2809.36	2544.64	1455.28	1901.52	2679.96	1336.75	1.27385e-15	1.93874e-13
AT2G31110	228.43	299.935	289.648	230.612	321.566	283.291	318.842	194.917	355.956	815.499	573.734	600.384	677.128	600.231	981.971	694.187	616.391	662.952	1.3272e-15	2.00486e-13
AT3G44860	779.088	1408.19	1225.59	981.902	2159.6	2176.86	2156.99	2182.08	1672.6	574.227	1108.7	399.955	694.736	628.975	336.816	532.748	501.689	592.425	1.42035e-15	2.12968e-13
AT3G51740	614.663	651.746	617.435	399.067	588.549	565.516	361.099	507.942	526.657	413.379	421.994	278.975	391.39	454.823	242.547	360.931	347.323	218.091	1.51686e-15	2.25767e-13
AT5G37600	1525.07	2189.15	1338.98	1641.31	1594.78	2577.31	3605.22	2286.15	3107.01	8091.46	4558.86	3868.64	5810.81	5773.21	4622.14	5487.77	6475.86	4400.87	1.58405e-15	2.34046e-13
AT1G20450	6561.56	4248.14	5010.6	9282.13	6334.03	4645.54	7642.61	8546.63	5169.97	1744.4	2092.25	5064.89	2301.91	2529.42	4729.17	2219.78	2276.9	5996.95	1.70878e-15	2.50646e-13
AT4G19380	196.427	95.2624	115.447	127.918	134.085	132.06	159.421	52.859	129.679	258.965	223.734	521.838	158.477	193.596	389.843	386.3	279.788	488.263	1.73757e-15	2.53035e-13
AT2G36145	1141.04	1325.19	2025.47	1099.01	1340.85	1588.98	1015.11	1656.8	1515.13	858.124	1247.15	769.214	1235.8	962.061	666.759	863.697	824.356	480.667	2.07467e-15	2.99968e-13
AT2G35760	240.568	110.354	205.124	224.306	186.295	191.7	298.675	206.48	169.377	294.352	290.19	593.161	280.936	324.632	559.724	371.309	301.228	469.817	2.09835e-15	3.01239e-13
AT1G55020	826.54	545.165	598.881	677.423	685.85	667.757	857.609	654.13	611.345	407.75	415.348	371.064	346.568	330.55	388.861	385.147	310.876	256.067	2.1464e-15	3.05968e-13
AT3G24100	271.467	352.754	309.233	383.753	323.939	446.236	309.239	279.987	316.259	616.852	675.633	550.728	642.711	574.024	549.904	425.506	568.152	559.874	2.25017e-15	3.17324e-13
AT5G07990	193.117	837.555	420.557	61.2563	177.989	248.146	92.1954	288.247	260.682	68.3604	107.437	63.1983	145.671	65.9409	70.7019	62.2692	52.5273	53.1664	2.25742e-15	3.17324e-13
AT5G18670	188.703	144.308	178.324	196.38	134.085	186.375	177.668	137.103	115.123	534.015	287.975	535.38	309.75	483.567	911.27	375.922	450.234	343.954	2.57622e-15	3.5964e-13
AT2G40330	12.1388	0.943192	0	0	0	0	0	4.95553	7.93955	132.7	21.0443	138.133	35.2171	40.579	95.2512	121.079	77.1829	117.183	2.61235e-15	3.62186e-13
AT3G07560	1261.33	1298.78	1295.69	1671.04	1257.79	1304.63	1579.81	1291.74	1295.47	1961.54	1872.94	2079.22	1635.99	1623.16	1835.3	1700.87	1695.88	1883.61	2.76929e-15	3.81333e-13
AT5G08380	597.007	692.303	611.25	648.596	827.054	924.422	785.582	921.728	894.522	491.391	560.443	321.409	593.087	598.54	424.212	484.316	629.255	365.654	2.87308e-15	3.92952e-13
AT4G14750	278.088	173.547	151.524	239.62	163.75	168.27	211.281	114.803	183.933	230.013	264.715	397.247	249.721	268.836	387.879	273.293	203.677	386.27	3.16323e-15	4.29732e-13
AT1G23030	779.088	305.594	407.156	641.389	323.939	444.106	472.501	220.521	449.908	663.498	571.519	1283.83	459.422	627.284	933.855	953.642	675.35	1176.17	3.27989e-15	4.4261e-13
AT1G59960	407.2	404.63	404.064	256.736	341.738	343.996	386.068	355.146	467.11	729.445	657.911	454.125	693.936	712.669	559.724	575.414	638.903	620.636	3.45031e-15	4.60327e-13
AT3G03341	11.0352	37.7277	82.4621	28.8265	28.4782	53.2501	34.5733	47.9034	68.8094	1.60848	8.86076	0	12.8062	5.07238	5.89183	0	0	2.17006	3.45666e-15	4.60327e-13
AT2G06850	4608.32	1314.81	2211.01	4268.12	2264.02	2411.17	2412.45	1162.07	2195.28	3710.76	2378.01	10683.2	2129.03	4137.37	9094.04	7717.93	4618.11	9146.78	3.76801e-15	4.9851e-13
AT5G49720	7005.17	5125.31	6193.93	7501.19	5766.83	6153.58	7841.41	5527.89	6469.41	7093.39	6871.52	9059.03	6684.84	7109.78	9259.99	7784.81	6786.74	9367.05	4.26908e-15	5.61135e-13
AT1G55520	400.579	395.198	402.003	336.91	361.91	357.841	350.535	394.79	346.693	612.831	569.304	620.246	519.452	610.376	523.391	535.054	474.889	546.854	4.76368e-15	6.22106e-13
AT1G64670	450.238	427.266	423.649	514.373	420.053	474.991	544.529	327.065	480.342	791.372	595.886	943.461	802.789	749.866	925.017	870.616	708.582	817.026	5.3591e-15	6.95377e-13
AT2G43590	654.39	678.155	222.648	290.967	341.738	359.971	350.535	664.041	565.031	2533.36	1313.61	826.995	2191.46	955.297	1169.53	1350.32	1403.23	966.76	6.08829e-15	7.84962e-13
AT1G65484	0	1.88638	0	1.80166	4.74637	4.26001	1.92074	4.95553	0	31.3654	39.8734	10.834	40.0194	21.9803	5.89183	23.0627	27.8716	13.0203	6.34652e-15	8.13078e-13
AT4G38740	5645.63	7961.49	8662.64	4959.06	7948.98	8383.7	5517.32	8600.32	7693.42	4190.89	5999.84	4592.71	5598.71	5584.69	4104.64	4222.78	4651.34	3980.97	8.29201e-15	1.05564e-12
AT5G46830	248.293	386.709	190.694	258.538	304.954	168.27	229.528	318.806	178.64	19.3018	90.8228	25.2793	123.26	62.5593	56.9543	16.1439	30.0156	26.0407	8.62687e-15	1.09141e-12
AT3G29575	371.888	347.095	251.509	479.24	423.613	224.716	380.306	559.975	219.661	57.101	103.006	50.5587	156.076	59.1777	83.4676	41.5128	98.6226	62.9316	9.6549e-15	1.21388e-12
AT1G02920	188.703	305.594	225.74	200.885	218.333	271.576	976.695	395.616	571.647	6537.67	5138.13	990.408	4964	1837.05	850.387	5046.11	3069.09	1342.18	1.29063e-14	1.61265e-12
AT3G16150	0	6.60235	7.21543	12.6116	5.93296	17.04	9.60369	14.8666	31.7582	119.027	39.8734	45.1417	123.26	67.6317	53.0265	65.7286	81.4708	45.5712	1.40041e-14	1.73908e-12
AT1G10990	39.7269	52.8188	24.7386	26.124	23.7318	40.4701	59.5429	14.8666	29.1117	283.897	135.127	120.98	138.467	157.244	127.656	295.202	231.549	156.244	1.46125e-14	1.80358e-12
AT5G08350	15.4493	29.239	24.7386	16.2149	30.8514	19.17	25.93	24.7776	18.5256	114.202	70.8861	228.417	65.6318	60.0231	152.206	73.8006	47.1673	180.115	1.58348e-14	1.94259e-12
AT5G40390	1130.01	703.622	698.866	1117.93	930.288	745.502	1299.38	955.591	648.396	520.343	604.747	1091.53	673.126	589.241	911.27	664.205	531.704	980.865	1.80039e-14	2.19539e-12
AT1G64110	101.524	111.297	107.201	285.562	87.8078	29.8201	108.522	184.18	56.9001	4.82544	6.64557	1.80567	40.0194	3.38158	5.89183	2.30627	4.28794	2.17006	1.82366e-14	2.21046e-12
AT4G33790	151.183	67.9099	126.785	218.901	87.8078	89.4602	151.738	79.2885	105.861	69.1646	101.899	253.696	70.4341	88.7666	308.339	84.1788	121.134	294.043	2.00217e-14	2.41238e-12
AT4G22990	891.648	747.952	769.99	1277.37	1142.69	928.682	1575.97	1942.57	1282.24	531.602	471.836	510.101	777.977	690.689	586.237	633.071	820.068	595.68	2.04616e-14	2.45079e-12
AT4G17870	520.863	548.938	586.511	720.662	509.048	615.571	586.785	548.412	586.203	1360.77	862.817	1384.95	889.231	809.889	1418.95	1500.23	1277.81	1155.55	2.1642e-14	2.57692e-12
AT5G48930	2982.83	2314.59	2302.75	2350.26	2582.02	2259.94	2470.07	2506.67	2158.23	3343.22	3276.27	3930.03	3035.07	3029.05	3015.63	4003.68	3264.19	3847.51	2.21657e-14	2.62385e-12
AT4G32460	468.998	196.184	249.448	442.306	293.088	213	286.19	205.654	269.945	218.753	286.867	1169.17	236.114	278.981	964.296	402.444	400.922	1062.24	2.32966e-14	2.74169e-12
AT1G66180	667.632	395.198	486.526	836.869	339.365	489.901	717.395	296.506	393.007	693.255	573.734	918.181	542.663	841.169	1271.65	979.011	782.549	1115.41	2.38238e-14	2.78752e-12
AT5G14270	1258.02	1314.81	1409.07	1354.85	1293.38	1325.93	1298.42	1416.46	1593.2	977.956	1022.31	917.279	968.469	984.041	833.694	1193.49	1021.6	908.168	2.44388e-14	2.84305e-12
AT4G16380	1797.64	1808.1	2033.72	1987.23	1599.53	2226.92	2175.24	1611.37	2322.32	4076.69	2967.25	3391.04	2901.4	3073.01	3521.35	3273.75	3310.29	3907.19	2.49551e-14	2.88653e-12
AT1G62480	1877.09	1090.33	566.927	1285.48	882.824	715.682	1018.95	565.756	700.003	1211.19	1179.59	5009.82	671.525	1611.32	3620.53	2961.25	1352.84	4098.15	2.62512e-14	3.00213e-12
AT1G78460	845.3	1437.43	909.144	1049.46	1076.24	876.497	1399.26	861.436	972.594	5680.35	4144.62	1412.93	3838.66	3360.45	3208.1	4526.05	5053.34	1805.49	2.61421e-14	3.00213e-12
AT4G21870	8.82819	29.239	30.9233	18.0166	30.8514	6.39001	28.8111	4.95553	21.1721	286.309	99.6836	102.923	102.45	177.533	145.332	367.85	176.877	167.094	2.66159e-14	3.02673e-12
AT1G12940	0	5.65915	2.06155	0	2.37318	6.39001	5.76221	0	13.2326	115.811	68.6709	105.631	55.2267	65.0955	100.161	35.7472	113.63	62.9316	2.76115e-14	3.12242e-12
AT5G57560	381.819	49.9892	57.7235	295.472	66.4491	108.63	184.391	33.0369	117.77	172.912	37.6582	595.87	84.0407	221.494	910.288	314.806	232.621	839.812	2.85394e-14	3.20941e-12
AT5G52810	270.363	256.548	466.941	227.009	407.001	648.586	359.178	439.39	582.233	280.68	334.494	135.425	260.926	295.043	89.3594	229.474	270.14	168.179	2.94074e-14	3.28875e-12
AT1G04990	770.26	682.871	681.343	708.952	647.879	677.342	844.164	747.459	710.589	385.231	478.481	327.728	494.639	414.244	395.734	291.743	454.522	343.954	2.96256e-14	3.29495e-12
AT1G55360	1945.51	2400.42	1999.71	1881.83	1859.39	1839.26	1719.06	1391.68	1898.87	2909.74	3558.7	3046.16	2922.21	2833.77	3445.74	2611.85	2623.15	2996.85	3.25295e-14	3.59816e-12
AT4G15233	70.6256	162.229	186.57	90.9836	182.735	312.046	181.51	150.318	345.37	918.442	461.867	201.332	440.213	396.491	225.853	683.809	588.52	224.601	3.66532e-14	4.03225e-12
AT2G19190	6.62115	9.43192	10.3078	4.50414	3.55977	6.39001	34.5733	0	7.93955	202.668	70.8861	325.923	139.267	128.5	72.6659	86.4851	199.389	120.438	3.80134e-14	4.15929e-12
AT2G36970	94.9031	344.265	191.724	112.603	157.817	290.746	304.437	249.428	436.675	966.696	787.5	368.356	753.165	672.09	610.786	676.89	584.232	486.092	4.3394e-14	4.72248e-12
AT5G57190	84.9714	165.059	143.278	71.1654	145.951	168.27	84.5124	161.055	149.528	119.027	151.741	66.8097	92.0446	97.2205	61.8642	106.088	120.062	41.2311	4.40964e-14	4.77326e-12
AT5G62790	4771.64	4559.39	4872.48	4892.4	4971.82	4935.22	4238.11	5124.84	4979.42	3379.42	3918.67	2702.18	3987.53	3749.33	2753.45	3257.6	3440	2588.88	4.57092e-14	4.92152e-12
AT2G40130	709.566	1325.19	592.696	656.704	978.938	676.277	785.582	972.11	686.771	149.589	315.665	322.311	280.136	240.092	272.006	177.583	133.998	350.464	4.80941e-14	5.1509e-12
AT1G72430	452.445	205.616	210.278	583.736	160.19	317.371	262.181	115.629	305.672	594.333	351.108	1468.01	364.176	497.093	795.397	684.962	477.033	1049.22	4.99722e-14	5.32388e-12
AT1G76180	11973.2	9032.95	7880.28	13246.7	9720.56	8217.56	13747.7	11908.1	8339.17	7123.96	8087.66	8923.6	7413.19	7159.66	10398.1	7598	6862.85	10143.9	5.66672e-14	6.00554e-12
AT5G59050	513.139	540.449	378.295	562.117	424.8	432.391	715.475	431.131	490.929	632.937	459.652	957.003	721.149	616.294	1246.12	592.711	553.144	1091.54	5.93681e-14	6.25901e-12
AT3G27300	1412.51	1471.38	1343.1	1484.56	1332.54	1388.76	1599.01	1609.72	1566.74	953.828	1127.53	955.198	1218.99	1086.33	1122.39	919.048	1056.98	1060.07	6.35816e-14	6.66849e-12
AT4G19820	11.0352	16.0343	12.3693	21.6199	23.7318	22.3651	10.5641	21.474	27.7884	73.1858	46.519	38.8218	63.2306	68.4771	66.7741	57.6567	62.1751	47.7412	6.9474e-14	7.24893e-12
AT2G27360	313.401	239.571	216.463	299.075	268.17	259.861	350.535	259.339	222.307	343.41	270.253	528.157	364.176	369.438	449.743	364.39	351.611	505.623	7.36323e-14	7.64341e-12
AT1G32450	828.747	296.162	256.663	429.695	302.581	232.171	309.239	308.895	248.772	377.993	362.184	1148.4	289.74	426.08	1018.3	473.938	447.018	921.189	7.87937e-14	8.13746e-12
AT2G36950	286.916	586.666	352.525	385.554	346.485	358.906	362.059	355.972	349.34	1012.54	954.747	529.06	906.039	750.712	748.262	720.709	753.605	541.429	8.27389e-14	8.50153e-12
AT5G53560	2076.83	1746.79	1725.52	1982.72	1886.68	1849.91	1878.48	1822.81	1942.54	2386.98	2394.62	2853.86	2283.51	2410.22	2446.09	2384.68	2204	2805.88	8.42137e-14	8.60937e-12
AT1G16850	163.322	163.172	257.694	486.447	246.811	215.13	322.684	403.876	179.963	3.21696	31.0127	83.0607	24.0116	36.352	53.0265	25.3689	17.1518	70.5268	8.52207e-14	8.66853e-12
AT2G26330	3060.07	3113.48	2977.91	3507.82	3462.47	3094.9	2811.96	3147.59	2887.35	2294.5	2417.88	2088.25	2749.33	2548.87	2331.2	2318.95	2355.15	2106.04	9.09105e-14	9.20105e-12
AT3G18773	72.8326	48.1028	87.616	75.6695	62.8894	52.1851	48.0184	39.6442	46.314	130.287	109.652	160.704	136.866	169.079	369.221	137.223	94.3347	141.054	9.68464e-14	9.75306e-12
AT1G13920	261.535	301.822	313.356	399.968	268.17	239.626	284.269	341.106	199.812	83.6409	135.127	128.202	121.659	113.283	137.476	122.232	146.862	117.183	1.02874e-13	1.03088e-11
AT2G18790	2126.49	2341	2375.94	2507.9	2737.47	2263.13	2274.15	2694.16	2571.09	1860.21	1989.24	1605.24	2025.78	1760.11	1366.9	1848.47	1819.16	1514.7	1.11506e-13	1.11187e-11
AT2G21590	649.976	1253.5	1171.99	459.422	569.564	768.932	565.657	1144.73	811.157	337.781	706.646	327.728	616.298	465.813	376.095	226.014	314.092	266.917	1.17068e-13	1.16161e-11
AT2G01670	752.604	618.734	674.127	760.299	625.334	781.712	853.768	611.182	682.801	1346.3	1174.05	1058.12	1202.98	1059.28	1254.96	1300.74	1020.53	1210.89	1.38433e-13	1.36027e-11
AT2G46710	1156.49	1228.98	1106.02	1419.7	1365.77	1086.3	1090.98	989.454	1054.64	1619.74	1364.56	1533.01	1455.1	1473.53	1534.82	1868.08	1580.11	1648.16	1.38007e-13	1.36027e-11
AT1G71970	376.302	402.743	387.572	430.596	318.007	371.686	425.443	327.065	318.905	863.754	613.608	592.259	652.316	643.346	852.351	648.061	749.317	648.847	1.39805e-13	1.36711e-11
AT4G32200	109.249	121.672	98.9545	187.372	104.42	104.37	175.747	117.281	132.326	158.435	182.753	316.894	144.07	166.543	223.889	212.177	207.965	330.933	1.43395e-13	1.39548e-11
AT1G06690	1286.71	1336.5	1603.89	1178.28	1334.92	1464.38	1136.12	1330.56	1329.87	944.982	1220.57	984.991	1102.13	1016.17	870.027	923.66	1055.91	847.407	1.52123e-13	1.47334e-11
AT4G36210	2180.56	2706.02	2534.68	2494.39	3048.35	3044.84	2850.37	3216.14	3193.02	2269.56	2455.54	1551.97	2424.37	2062.77	1888.33	1996.08	2311.2	1804.4	1.55597e-13	1.49981e-11
AT3G10410	1964.27	1884.5	2045.06	2659.24	2026.7	1932.98	2339.46	2420.78	2089.42	1075.27	1381.17	1514.05	1425.49	1243.58	1742.02	1003.23	1137.38	1681.79	1.56978e-13	1.50595e-11
AT5G03380	827.643	502.722	542.188	583.736	482.943	570.841	780.78	417.09	542.536	1411.44	1027.85	1238.69	1007.69	1032.23	1149.89	1549.81	912.259	1293.35	1.65044e-13	1.57586e-11
AT1G21110	13.2423	31.1254	8.24621	14.4132	18.9855	12.78	56.6618	18.1703	60.8698	366.733	299.051	48.753	261.727	131.882	61.8642	172.97	159.726	58.5915	1.81196e-13	1.72196e-11
AT3G15020	963.377	801.714	1100.87	783.72	939.781	958.502	876.817	866.392	905.108	397.294	678.956	484.821	640.31	557.961	429.122	387.453	451.306	489.348	1.93056e-13	1.82609e-11
AT3G04550	2314.09	2019.38	2462.52	2671.86	2516.76	2413.3	2145.46	2709.02	2541.98	1524.03	1273.73	1466.2	1668.01	1748.28	1356.1	1780.44	1796.65	1449.6	2.24125e-13	2.11011e-11
AT1G35720	13417.8	11760.7	15609	10994.6	11826.8	12852.4	13546	14578.3	12080	6223.21	11110.3	4683.9	8744.23	8929.92	6528.15	5674.57	7217.67	4977.02	2.28213e-13	2.13865e-11
AT1G31690	972.205	321.629	532.911	891.82	806.882	711.422	953.646	616.137	617.961	172.107	153.956	584.133	243.318	257	315.213	362.084	348.395	495.858	2.507e-13	2.33856e-11
AT1G08890	946.824	780.963	863.79	1548.52	764.165	842.417	1131.31	1074.52	927.604	528.386	441.93	444.194	512.248	584.169	578.381	563.883	489.897	610.871	2.57462e-13	2.39061e-11
AT3G15530	524.174	509.324	492.711	518.877	429.546	523.981	566.618	487.294	477.696	994.04	682.279	846.858	715.546	726.195	1027.14	734.546	792.197	945.059	2.63644e-13	2.43684e-11
AT4G36410	6.62115	16.9775	47.4157	21.6199	7.11955	36.2101	19.2074	14.8666	44.9908	242.076	117.405	211.263	132.064	91.3028	179.701	147.601	184.381	231.111	2.65507e-13	2.4429e-11
AT1G20030	297.952	348.981	351.495	439.604	354.791	267.316	284.269	450.953	340.077	99.7257	126.266	60.4898	258.525	134.418	96.2332	129.151	165.086	71.6118	2.7956e-13	2.52845e-11
AT2G39570	751.5	910.181	670.004	669.315	735.687	689.057	745.246	788.755	656.336	1882.73	1377.85	1300.98	1117.34	1221.6	2183.9	1875	1715.18	1324.82	2.79801e-13	2.52845e-11
AT2G40670	123.595	63.1939	89.6775	105.397	53.3966	89.4602	112.363	40.4701	119.093	15.2806	32.1203	24.3765	22.4109	37.1974	42.2248	42.666	73.9669	33.6359	2.77523e-13	2.52845e-11
AT4G15910	314.504	645.144	374.172	230.612	390.389	334.411	244.894	396.442	310.966	255.748	287.975	134.522	327.359	295.043	198.358	284.824	250.844	93.3124	2.79667e-13	2.52845e-11
AT5G23280	994.275	1039.4	1000.88	1091.8	1073.87	1208.78	1164.93	856.481	1099.63	1607.68	1368.99	1936.58	1505.53	1340.8	1688.01	1727.39	1523.29	2042.02	3.01764e-13	2.71481e-11
AT4G23400	3335.95	1662.85	1900.75	3642.95	2538.12	2531.51	2936.81	1601.46	2412.3	4783.62	3230.85	7090.85	2693.3	4550.77	6243.37	8077.7	4820.72	6138	3.19375e-13	2.86053e-11
AT1G48100	495.482	376.334	258.725	600.852	700.089	270.511	428.324	668.996	284.5	143.155	184.968	204.04	253.723	158.934	195.412	122.232	141.502	210.495	3.5982e-13	3.20858e-11
AT1G19850	505.414	545.165	520.542	504.464	510.234	512.266	338.05	475.731	529.303	341.802	394.304	262.724	396.992	389.728	282.808	304.427	307.66	208.325	3.95e-13	3.50683e-11
AT3G20820	3335.95	2309.88	2099.69	3863.65	2466.92	2160.89	2601.64	2211.82	1931.96	2121.58	2319.3	3344.09	2315.52	2447.42	3712.83	2839.02	2374.45	3239.89	4.27395e-13	3.77787e-11
AT1G10960	2794.12	2190.09	3024.3	3135.78	2787.3	2779.66	2307.77	2378.65	2728.56	3990.64	3972.94	6875.98	4043.56	4009.71	4827.37	4180.11	3732.65	6315.95	4.40734e-13	3.86206e-11
AT3G23050	3684.67	1729.81	2313.06	3637.54	2662.71	2509.15	3322.88	2139.14	2420.24	3535.44	3638.45	4741.68	3282.39	4037.61	4668.29	4530.66	4084.26	4410.64	4.40657e-13	3.86206e-11
AT4G23570	662.115	657.405	619.496	607.158	678.73	829.637	874.896	675.604	899.815	1591.59	1176.27	1341.61	1062.91	1079.57	1365.92	1166.97	1194.19	1670.94	4.58999e-13	4.00477e-11
AT3G26450	4005.79	3014.44	3445.88	4619.45	3366.36	3230.15	5368.46	3045.17	3200.96	4431.36	4967.56	5857.58	4316.49	4604.03	5338	5137.21	4174.31	6084.84	4.6353e-13	4.0149e-11
AT4G26670	698.531	707.394	746.282	877.406	816.375	771.062	630.002	785.451	879.966	461.634	385.443	465.862	398.593	553.734	369.221	508.532	512.409	412.311	4.64128e-13	4.0149e-11
AT2G37580	184.289	202.786	264.909	280.157	266.983	242.821	330.367	327.065	265.975	91.6833	109.652	147.162	125.661	147.099	133.548	73.8006	135.07	145.394	5.07615e-13	4.3724e-11
AT1G07590	1664.11	2731.49	1776.03	1067.48	1272.03	1198.13	1375.25	1792.25	1523.07	999.67	1280.38	961.517	1237.4	1019.55	1014.38	809.5	971.218	824.621	5.5044e-13	4.72119e-11
AT2G31810	827.643	802.657	912.237	872.001	959.953	1030.92	953.646	761.5	1090.36	1727.51	1233.86	1457.17	1154.96	1364.47	1320.75	1918.82	1942.44	1514.7	6.12919e-13	5.2349e-11
AT3G63160	7075.8	5806.29	7224.71	9346.09	7988.13	7074.81	6050.32	9298.22	7956.75	2436.85	1841.93	4881.62	2559.64	3274.22	3791.39	3558.57	3220.24	4829.46	6.2925e-13	5.35179e-11
AT4G23260	480.033	950.738	880.283	563.918	853.159	858.392	682.822	698.73	800.571	1539.31	1577.22	845.955	1422.29	1099.86	1113.56	1240.77	1179.18	775.795	6.33177e-13	5.36267e-11
AT3G15356	173.253	412.175	237.078	90.9836	170.869	225.781	1053.52	181.703	531.95	5241.23	4373.89	1261.26	1968.15	1668.81	1231.39	6073.56	2960.82	2036.6	7.08358e-13	5.97441e-11
AT5G44575	6.62115	1.88638	6.18466	10.8099	8.30614	4.26001	5.76221	4.95553	0	117.419	53.1646	75.838	112.855	46.4968	19.6394	54.1973	87.9028	26.0407	7.24176e-13	6.08247e-11
AT1G72250	180.978	237.684	269.033	126.116	196.974	263.056	105.641	227.954	213.044	176.933	194.937	103.826	170.483	273.908	87.3955	124.538	166.158	80.2921	8.20696e-13	6.85255e-11
AT5G10180	6352.99	4427.35	6008.39	4178.04	4811.63	4916.05	4040.27	4270.01	4230.45	2992.58	3800.16	3083.18	3170.34	4177.95	3218.9	2832.1	2761.43	2629.02	8.22631e-13	6.85255e-11
AT1G67300	954.548	1234.64	1075.1	1180.08	1038.27	993.647	1105.38	1472.62	935.543	530.798	752.057	487.53	742.76	651.8	589.183	433.578	555.288	551.194	8.6242e-13	7.15455e-11
AT1G22770	2308.57	2093.89	2144.01	3400.63	2915.46	2437.79	2825.4	3162.45	2672.98	1611.7	1313.61	1997.97	1547.95	1778.71	1926.63	2051.43	2005.68	2285.07	8.7594e-13	7.23705e-11
AT4G36250	2901.17	2214.62	2557.36	3316.85	2551.17	2543.23	3733.91	2382.78	2506.25	2728.79	3198.73	4506.94	3259.18	2722.18	3989.75	3336.02	2753.93	4960.75	8.94921e-13	7.36382e-11
AT3G53730	1004.21	989.409	1018.41	942.266	1022.84	1135.29	843.204	1017.54	993.766	690.038	606.962	622.052	705.141	717.741	556.778	796.816	855.444	531.664	9.36796e-13	7.67718e-11
AT2G36830	5426.03	2566.43	2912.97	4069.94	3182.44	3403.75	2759.14	2339.01	2962.77	3934.34	4146.84	10723	3025.46	4437.48	7062.34	5837.16	3884.87	9319.3	9.56451e-13	7.80665e-11
AT1G48330	233.947	183.923	206.155	169.356	303.767	204.48	153.659	193.266	238.186	60.318	77.5317	82.1578	100.849	131.882	88.3774	113.007	114.702	95.4825	9.94853e-13	8.08747e-11
AT5G45280	953.445	376.334	688.558	1042.26	659.745	693.317	1059.29	669.822	747.641	366.733	503.956	763.797	435.411	568.106	697.2	599.63	569.224	847.407	1.00694e-12	8.15299e-11
AT5G10430	505.414	202.786	216.463	483.745	261.05	281.161	875.856	199.047	217.014	230.013	258.07	582.327	199.296	168.234	381.005	398.984	214.397	537.089	1.21805e-12	9.82303e-11
AT2G33620	899.372	750.781	780.297	690.034	729.754	773.192	572.38	801.97	792.631	435.898	520.57	441.485	542.663	575.715	484.112	488.929	516.697	373.25	1.39961e-12	1.12424e-10
AT5G65430	1558.18	1457.23	1682.23	1716.08	1457.13	1777.49	1676.8	1428.84	1697.74	2278.41	1918.35	3034.42	1827.28	2077.14	2711.22	2970.47	2468.78	3359.25	1.45182e-12	1.16157e-10
AT5G12140	2944.2	3971.78	3881.9	2894.36	3744.88	3587.99	2521.93	3959.47	3222.13	2407.89	2675.95	2247.15	2433.18	2562.4	2200.6	1639.76	2346.57	1891.2	1.49285e-12	1.18969e-10
AT1G67860	1203.94	2061.82	2019.29	1420.61	1962.62	2095.92	1217.75	2413.34	2130.44	1034.25	1452.06	1136.67	1225.39	1449.85	1088.02	1012.45	1254.22	910.338	1.50652e-12	1.19588e-10
AT2G16990	446.927	598.927	515.388	565.72	461.584	415.351	505.154	502.16	373.159	108.572	207.12	245.571	225.709	199.513	254.331	93.4039	201.533	232.196	1.65352e-12	1.30745e-10
AT1G54040	1777.78	1420.45	2114.12	2742.12	1847.52	2056.52	3479.42	2488.5	1967.68	937.744	1324.68	909.153	1244.6	1261.33	924.035	1062.04	911.187	825.706	1.70283e-12	1.3412e-10
AT4G01380	57.3833	174.491	146.37	34.2315	117.473	149.1	54.741	131.322	120.416	213.124	149.525	103.826	180.087	220.648	92.3053	139.529	161.87	80.2921	1.74855e-12	1.37186e-10
AT2G29720	83.8678	177.32	98.9545	82.8762	117.473	166.14	146.936	138.755	243.479	486.565	554.905	162.51	308.149	259.537	166.935	262.915	277.644	168.179	1.84261e-12	1.43546e-10
AT4G12730	2996.07	953.568	1839.94	2434.04	1811.93	1994.75	2102.25	995.235	1736.11	2002.56	1734.49	6302.68	1672.81	2328.22	4056.52	3385.6	2217.94	5931.85	1.84379e-12	1.43546e-10
AT3G26510	571.626	424.437	384.479	744.084	393.948	422.806	651.13	409.657	314.935	2020.25	1078.8	1028.33	1171.77	1584.27	3128.56	1451.8	1696.95	864.767	2.18006e-12	1.69076e-10
AT4G17460	530.795	206.559	340.156	584.637	306.141	222.586	293.873	212.262	277.884	574.227	600.317	604.898	598.69	662.79	988.845	712.637	629.255	713.948	2.40029e-12	1.85445e-10
AT1G69160	625.698	483.858	434.987	626.976	389.202	412.156	532.044	387.357	416.826	1221.64	863.924	792.688	936.453	956.988	1226.48	1048.2	806.133	733.479	2.62205e-12	2.01808e-10
AT5G24570	167.736	90.5465	94.8314	246.827	93.7407	191.7	146.936	78.4625	119.093	193.822	112.975	435.166	112.054	157.244	266.114	200.645	190.813	376.505	2.69289e-12	2.06475e-10
AT2G31360	3830.33	3780.32	4264.32	3985.26	3750.82	4219.54	3120.24	3914.87	4432.91	2047.59	2031.33	2948.65	2339.53	2419.52	2070	2430.81	2283.33	2624.68	2.71486e-12	2.07375e-10
AT1G49240	4188.98	2904.09	2850.1	3909.59	3097	2792.44	4119.98	2875.03	3174.49	3976.97	3661.71	4731.75	3371.23	3833.87	4476.81	5139.52	3939.54	5324.23	2.77147e-12	2.10902e-10
AT5G40450	3319.4	2564.54	1985.27	4377.12	2941.56	2423.95	3706.06	1868.23	3202.28	11733.1	5378.48	6446.23	5443.44	6782.61	6633.22	14258.5	10046.6	7000.6	2.88948e-12	2.1906e-10
AT2G44500	334.368	129.217	159.77	264.843	129.338	177.855	321.724	120.585	178.64	320.892	249.209	394.538	157.676	269.681	477.238	364.39	271.212	513.218	2.94119e-12	2.21322e-10
AT4G30270	2517.14	828.123	943.16	1880.93	1372.89	1329.12	2958.9	773.062	1141.97	3783.95	1818.67	4473.54	1698.42	3015.53	4153.74	4398.05	2598.49	5070.34	2.93378e-12	2.21322e-10
AT1G18500	1392.65	1306.32	1262.7	1416.1	1396.62	1447.34	1493.37	1224.84	1459.55	2033.12	1590.51	2269.72	1836.09	1798.16	1910.92	1981.08	1843.81	2181.99	2.998e-12	2.24761e-10
AT1G69260	131.319	301.822	101.016	241.422	143.578	90.5252	141.174	341.106	42.3442	16.0848	37.6582	12.6397	53.626	31.2797	25.5313	9.22507	19.2957	15.1904	3.05114e-12	2.27901e-10
AT1G14210	248.293	207.502	178.324	208.992	223.079	185.31	175.747	159.403	157.468	369.95	301.266	407.178	265.729	327.168	260.222	395.525	316.236	316.828	3.13425e-12	2.33248e-10
AT4G32030	520.863	448.016	372.11	472.034	431.919	470.731	493.63	455.083	427.412	612.026	572.627	679.833	571.477	634.892	799.325	757.609	573.512	774.71	3.29071e-12	2.43995e-10
AT1G75040	203.048	138.649	141.216	149.537	168.496	266.251	559.895	232.91	295.086	696.472	980.222	320.506	853.213	926.554	633.372	563.883	547.784	602.19	3.56235e-12	2.63172e-10
AT1G19380	50.7621	24.523	37.1079	36.0331	42.7173	72.4202	89.3143	19.8221	47.6373	212.319	182.753	126.397	125.661	149.635	154.17	171.817	185.453	205.07	3.57586e-12	2.63209e-10
AT4G30460	323.333	313.14	306.14	270.248	220.706	259.861	163.263	431.131	235.54	88.4664	119.62	110.146	76.0368	94.6844	100.161	50.7379	113.63	104.163	3.87659e-12	2.84312e-10
AT1G49780	260.432	202.786	213.371	218.901	167.309	206.61	231.449	239.517	189.226	337.781	369.937	418.012	297.744	311.106	552.85	306.734	261.564	509.963	4.34973e-12	3.1786e-10
AT1G27630	836.471	785.679	932.852	913.439	857.906	807.272	767.335	923.38	795.278	556.534	596.994	595.87	629.105	652.646	587.219	540.82	592.808	587	4.46453e-12	3.25076e-10
AT1G24070	338.782	2269.32	1497.72	606.257	1065.56	795.557	976.695	1976.43	1059.93	165.673	502.848	101.117	447.417	287.435	169.881	101.476	243.341	120.438	4.60465e-12	3.34076e-10
AT1G27020	22.0705	138.649	44.3234	27.0248	92.5541	87.3302	153.659	14.0407	206.428	2575.18	825.158	1189.93	1132.55	967.978	985.899	2192.11	1544.73	1348.69	4.88794e-12	3.53363e-10
AT2G43200	169.943	227.309	144.309	214.397	169.683	221.521	223.766	246.951	168.054	355.474	268.038	415.303	351.37	415.935	344.672	491.235	348.395	516.473	4.95463e-12	3.5691e-10
AT1G49560	370.784	320.685	349.433	354.025	272.916	296.071	301.556	314.676	367.866	169.695	155.063	180.567	206.5	170.77	101.143	146.448	169.374	158.414	5.09812e-12	3.65944e-10
AT5G52640	161.115	98.092	136.062	103.595	116.286	135.255	250.656	136.277	152.175	447.962	475.158	613.927	345.767	310.26	427.158	189.114	200.461	1066.58	5.58254e-12	3.993e-10
AT2G19450	375.198	300.878	438.08	393.662	361.91	366.361	409.117	341.931	432.705	209.102	262.5	232.931	203.298	239.247	272.006	156.826	214.397	307.063	5.82779e-12	4.15374e-10
AT1G11840	10551.9	13030.2	14538.1	8695.69	11145.7	11568.1	11510	13426.2	11728	7370.86	11554.4	4684.8	10626.7	9331.48	5670.89	6277.66	7533.91	5058.4	6.40436e-12	4.54867e-10
AT1G31190	1160.91	1042.23	1189.52	1211.61	1196.08	1144.88	1169.73	1182.72	1269	723.816	878.323	775.534	781.979	828.488	780.667	869.463	1071.98	722.629	6.95742e-12	4.9242e-10
AT3G28070	632.319	720.599	617.435	799.935	754.672	608.116	722.197	683.863	459.17	946.59	953.639	1470.72	871.622	825.106	1630.07	889.066	829.716	1574.38	7.4627e-12	5.26341e-10
AT3G51660	346.507	478.199	558.681	540.497	533.966	600.661	598.31	602.097	705.296	361.908	275.791	193.206	421.004	267.145	183.629	419.741	299.084	208.325	8.40893e-12	5.9102e-10
AT5G27360	419.339	309.367	300.987	436.001	384.456	305.656	262.181	227.954	277.884	423.03	470.728	711.433	358.574	448.905	488.04	495.848	424.506	547.939	1.01011e-11	7.07499e-10
AT2G46680	826.54	1802.44	948.314	1304.4	805.696	752.957	1054.48	1853.37	734.408	298.373	558.228	168.83	536.26	363.52	309.321	213.33	315.164	235.451	1.05175e-11	7.34121e-10
AT1G64640	808.883	340.492	431.895	601.753	437.852	500.551	497.471	335.324	508.131	485.761	496.203	1251.33	427.407	527.527	915.197	601.936	526.345	1120.83	1.09048e-11	7.58541e-10
AT4G24805	227.326	164.115	185.54	256.736	167.309	178.92	229.528	160.229	157.468	255.748	190.506	356.619	168.882	196.132	288.7	265.221	242.269	339.614	1.12935e-11	7.82888e-10
AT1G06090	37.5198	30.1822	50.508	50.4464	28.4782	42.6001	24.9696	26.4295	34.4047	8.84664	8.86076	10.834	14.407	16.9079	5.89183	2.30627	4.28794	6.51017	1.16299e-11	8.03455e-10
AT3G56240	4873.16	5448.82	5901.19	4242.9	5609.02	6033.24	3573.53	4535.96	4131.21	4510.98	4785.92	3577.03	4735.89	5044.48	4392.36	3589.71	3831.27	3090.16	1.23931e-11	8.5327e-10
AT5G44572	37.5198	66.0235	24.7386	30.6281	40.3441	14.91	19.2074	34.6887	14.5558	101.334	75.3165	95.7003	102.45	99.7567	99.1791	109.548	131.854	57.5065	1.31631e-11	9.03209e-10
AT1G33811	536.313	723.429	746.282	559.414	800.949	636.871	533.965	571.538	779.399	1109.85	976.899	1112.29	1025.3	1053.36	1099.81	1033.21	1298.17	1167.49	1.32623e-11	9.03889e-10
AT4G18440	6085.94	4263.23	5885.73	7319.23	7150.4	5779.77	11270.9	7842.95	4942.37	2785.89	2844.3	1790.32	2988.65	3192.22	1745.95	2661.43	3359.6	1959.56	1.32488e-11	9.03889e-10
AT5G20830	1080.35	1099.76	1626.56	1034.15	1343.22	1531.47	956.527	1594.03	1491.31	439.115	561.551	728.586	376.182	473.422	483.13	358.625	383.771	831.131	1.4245e-11	9.67609e-10
AT5G10790	346.507	344.265	414.372	293.67	383.269	388.726	402.394	398.92	431.382	257.357	208.228	241.959	244.118	271.372	249.421	236.392	278.716	222.431	1.59408e-11	1.07918e-09
AT3G27090	2228.02	2373.07	2117.21	2192.62	2474.04	2215.21	2281.84	2068.11	2298.5	3167.9	3196.52	4406.73	2971.04	2977.48	3890.57	3135.37	2880.42	4625.47	1.63329e-11	1.10203e-09
AT4G33490	919.236	499.892	656.604	1051.27	771.285	703.967	985.338	971.284	920.987	431.073	384.335	589.55	467.426	530.909	551.868	569.648	612.103	639.081	1.65829e-11	1.11519e-09
AT3G19450	1344.09	952.624	1122.51	1152.16	1136.75	1022.4	1018.95	1022.49	967.301	1459.7	1233.86	2117.14	1568.76	1256.26	1799.95	1747	1359.28	1844.55	1.71656e-11	1.15055e-09
AT5G04360	1645.35	1517.6	1667.8	1930.47	1790.57	1841.39	1673.92	1794.73	1823.45	1382.49	1274.84	1154.72	1445.5	1399.13	1249.07	1260.38	1404.3	1253.21	1.82371e-11	1.21833e-09
AT5G03760	3319.4	1882.61	2532.62	3357.39	2366.06	2272.72	3545.68	2167.22	2297.18	1760.48	2862.03	5278.87	2361.94	2418.68	4564.2	2104.47	1791.29	5237.43	1.87959e-11	1.25154e-09
AT1G66430	2114.35	2088.23	2214.11	1806.16	2222.49	2094.86	1578.85	2200.25	1950.48	1405.01	1703.48	1377.72	1660.8	1727.99	1209.79	1247.69	1532.94	1197.87	1.89978e-11	1.26083e-09
AT4G04570	720.601	608.359	853.482	828.762	840.107	1269.48	1154.36	645.871	1206.81	2077.35	1402.22	1932.97	1607.98	1550.46	1636.95	2329.33	1834.17	2096.27	2.01529e-11	1.33312e-09
AT5G03240	7763.29	9262.15	7655.57	9677.59	8622.96	7839.48	10636.1	10836.1	8615.73	6518.36	6375.32	5778.13	7421.99	6539.14	6694.1	6336.47	6800.67	6171.64	2.13314e-11	1.40648e-09
AT1G29390	1682.87	1706.24	2052.27	2058.39	1932.96	1973.45	2139.7	2239.07	2114.57	1412.25	1376.74	1067.15	1627.99	1283.31	1440.55	1371.08	1468.62	1213.06	2.50003e-11	1.64304e-09
AT1G26800	169.943	75.4554	105.139	148.637	145.951	108.63	229.528	94.155	125.709	537.232	242.563	282.587	337.764	415.935	597.039	484.316	539.208	334.189	2.51564e-11	1.64795e-09
AT1G77120	316.711	388.595	298.925	213.496	193.414	220.456	247.775	333.672	238.186	84.4452	201.582	90.2833	112.855	140.336	142.386	84.1788	108.27	98.7375	2.7132e-11	1.77163e-09
AT2G38670	1543.83	1748.68	1868.8	1783.64	1778.7	1662.47	1616.3	1876.49	1763.9	1337.45	1367.88	1291.95	1488.72	1378	1271.65	1274.21	1416.09	1229.34	2.72793e-11	1.77552e-09
AT3G26060	7527.14	5692.17	8645.12	7714.69	8354.79	8480.61	6188.62	7368.05	8134.06	4843.13	4284.18	4627.02	5188.91	5311.62	3634.28	5552.34	5501.43	4135.04	2.75143e-11	1.78508e-09
AT1G04530	1063.8	835.669	840.082	985.506	964.699	1100.15	1042.96	819.314	985.827	1549.77	1131.96	1648.57	1206.18	1241.04	1485.72	1607.47	1473.98	1571.12	2.85482e-11	1.84624e-09
AT1G65930	4693.29	3641.67	3794.29	4442.88	4315.63	4540.11	4613.61	3612.58	4710.8	7295.26	6130.54	6291.84	5639.53	6099.53	5430.3	8491.68	7320.58	6438.56	3.09563e-11	1.98999e-09
AT1G70640	15.4493	39.6141	20.6155	55.8513	24.9184	47.9251	66.2654	72.6811	34.4047	4.82544	4.43038	1.80567	9.60465	1.69079	9.81971	6.9188	2.14397	10.8503	3.09677e-11	1.98999e-09
AT1G06360	1155.39	929.988	1028.71	1399.89	999.11	1055.42	1120.75	1077	922.311	538.841	590.348	881.165	627.504	721.968	783.613	780.672	499.545	763.86	3.2665e-11	2.09242e-09
AT3G06070	241.672	83.0009	74.2159	326.1	149.511	152.295	172.866	65.2478	115.123	439.115	141.772	668.097	167.281	389.728	772.812	660.746	462.025	447.031	3.33507e-11	2.12961e-09
AT2G39200	47.4515	20.7502	6.18466	16.2149	14.2391	2.13	17.2866	11.5629	13.2326	65.9477	54.2722	213.971	46.4225	85.385	72.6659	85.3319	60.0311	71.6118	3.34717e-11	2.13061e-09
AT4G08950	435.892	185.809	249.448	474.736	224.266	264.121	194.955	99.1106	268.621	262.986	180.538	831.509	206.5	262.073	674.614	287.13	289.436	921.189	3.35978e-11	2.13193e-09
AT1G78240	1197.32	1076.18	1010.16	1308	1059.63	1161.92	1397.34	1036.53	1148.59	1645.47	1203.96	1802.06	1371.86	1360.24	1702.74	1915.36	1691.59	1815.25	3.51372e-11	2.22265e-09
AT2G25470	0	1.88638	0	0	0	2.13	1.92074	0	7.93955	32.1696	19.9367	46.9473	30.4147	28.7435	15.7115	13.8376	27.8716	21.7006	4.01255e-11	2.53028e-09
AT3G11900	400.579	281.071	296.863	445.009	390.389	417.481	553.172	450.953	408.887	404.533	416.456	656.36	400.194	421.853	625.516	518.91	496.329	643.422	4.1727e-11	2.6231e-09
AT4G19370	24.2775	22.6366	12.3693	18.0166	21.3586	10.65	30.7318	18.1703	31.7582	137.525	117.405	51.4615	76.0368	74.3948	62.8462	66.8818	57.8872	35.8059	4.27493e-11	2.67904e-09
AT1G73390	1121.18	1071.47	831.836	1377.37	1191.34	882.887	1279.21	1356.99	801.894	604.788	735.443	696.987	839.607	669.554	761.028	631.917	575.656	794.24	4.6022e-11	2.87524e-09
AT1G64150	990.965	794.168	992.637	1063.88	1159.3	1084.17	801.908	1171.16	1096.98	629.72	675.633	585.939	731.554	647.573	501.787	620.386	798.629	502.368	4.71082e-11	2.93016e-09
AT5G20400	80.5573	81.1146	94.8314	57.653	91.3675	110.76	99.8783	126.366	133.649	284.701	225.949	116.465	189.692	168.234	96.2332	268.68	152.222	138.884	4.71907e-11	2.93016e-09
AT1G28140	1759.02	1905.25	2102.78	2297.11	2103.83	2252.48	2210.77	2375.35	2330.26	1696.14	1652.53	1357.86	1816.08	1642.6	1285.4	1526.75	1741.98	1422.47	4.97136e-11	3.07738e-09
AT1G20070	473.412	296.162	188.632	317.091	199.347	158.685	214.162	136.277	145.558	61.9265	109.652	264.53	88.843	99.7567	109.981	88.7913	68.607	109.588	5.1967e-11	3.20706e-09
AT1G76680	1426.86	1937.32	1493.59	1149.46	1461.88	1454.79	2552.66	1821.16	1852.56	4325.2	4018.35	1867.06	3924.3	3075.55	2655.25	3270.29	3643.68	2249.26	5.23669e-11	3.22192e-09
AT3G12580	304.573	344.265	341.187	350.422	204.094	274.771	523.401	405.527	306.996	1158.11	1769.94	2888.16	1098.93	798.899	2011.08	562.729	430.938	4458.38	5.38404e-11	3.30254e-09
AT3G11410	2292.02	3056.89	2442.94	3233.07	2865.62	2266.33	3051.09	4506.23	2238.95	1206.36	1439.87	1417.45	1581.57	1782.94	2149.54	1080.49	1303.53	1682.88	5.5526e-11	3.39564e-09
AT5G14920	2559.07	1245.96	1743.04	2588.08	1604.27	1566.62	1730.58	1162.9	1515.13	1861.01	1645.89	3094.91	1196.58	2290.18	3458.5	2702.95	2508.44	3293.06	5.7761e-11	3.52168e-09
AT5G20490	2328.44	1778.86	1950.23	2332.24	2026.7	1890.38	2229.02	1935.13	1926.66	2423.98	2113.29	2845.73	1871.31	1913.98	2457.87	2238.23	1991.75	2715.82	5.79585e-11	3.52311e-09
AT5G62220	1381.61	983.75	768.959	1686.35	977.751	997.907	1362.76	1052.22	1075.81	666.715	723.26	1509.54	801.988	754.093	1133.2	944.417	636.759	1745.81	6.14015e-11	3.72123e-09
AT1G51820	1.10352	0	0	1.80166	0	0	10.5641	0	0	25.7357	24.3671	55.0728	18.4089	9.29936	21.6034	29.9815	21.4397	17.3604	6.25859e-11	3.78168e-09
AT1G01340	75.0396	50.9324	22.6771	16.2149	26.105	44.7301	63.3843	39.6442	62.1931	241.272	170.57	130.008	105.651	150.48	133.548	151.061	162.942	137.799	6.59297e-11	3.96271e-09
AT5G55910	1543.83	1498.73	1545.13	1581.85	1279.15	1473.96	1708.5	1350.38	1545.56	1741.98	1844.15	2619.12	1689.62	1778.71	2483.41	1771.21	1708.74	2672.42	6.59734e-11	3.96271e-09
AT5G18700	688.599	579.12	704.02	591.844	778.404	635.806	524.361	673.952	649.719	419.813	476.266	412.595	517.851	415.089	395.734	379.381	396.634	377.59	6.83684e-11	4.09442e-09
AT3G56720	990.965	1069.58	1077.16	1266.56	1167.61	978.737	1148.6	1257.05	1152.56	759.202	752.057	548.02	932.451	832.715	701.128	742.618	810.42	657.527	7.65348e-11	4.56996e-09
AT5G15470	589.282	427.266	519.511	710.753	533.966	556.996	729.88	517.853	492.252	435.898	465.19	680.736	419.403	414.244	559.724	473.938	414.858	730.224	7.87233e-11	4.68682e-09
AT5G51570	548.452	456.505	444.264	555.811	516.167	594.271	551.252	536.023	616.638	366.733	430.854	339.465	363.376	413.399	326.015	333.256	347.323	373.25	8.02772e-11	4.76531e-09
AT5G55950	98.2137	99.9784	118.539	82.8762	97.3005	102.24	77.7899	86.7217	71.4559	14.4763	62.0253	55.9757	27.2132	45.6514	30.4411	11.5313	19.2957	19.5305	8.0793e-11	4.78191e-09
AT2G35060	2497.28	3669.02	3259.31	3692.49	3428.06	3148.15	3653.24	4299.75	3620.43	2115.15	2547.47	2019.64	2689.3	2214.94	2304.69	2068.72	2122.53	2362.11	8.41031e-11	4.96331e-09
AT3G16570	1528.38	1234.64	1324.55	1824.18	1124.89	1246.05	1802.61	1158.77	1292.82	1219.23	1400	2194.79	1177.37	1301.06	1977.69	1752.76	1262.8	2298.09	8.514e-11	5.0099e-09
AT3G54030	640.044	473.483	498.896	694.538	487.689	412.156	605.032	592.186	431.382	269.42	385.443	357.522	356.973	312.797	368.239	253.689	296.94	355.889	8.7747e-11	5.14833e-09
AT3G28080	590.385	643.257	588.573	653.1	626.52	496.291	625.2	597.141	592.819	803.436	800.791	957.906	817.196	727.041	1109.63	852.166	726.806	1211.98	8.90735e-11	5.21105e-09
AT4G37180	690.806	954.511	876.16	642.29	617.028	570.841	568.538	873.825	558.415	357.887	466.298	235.639	435.411	439.606	275.934	253.689	489.897	231.111	9.1403e-11	5.33193e-09
AT1G52270	28.6916	30.1822	30.9233	28.8265	34.4112	40.4701	36.494	13.2147	34.4047	211.515	95.2532	59.587	112.054	96.3751	100.161	161.439	156.51	72.6969	9.27239e-11	5.39344e-09
AT3G28007	116.974	309.367	277.279	165.752	264.61	197.025	124.848	374.142	262.005	22.5187	65.3481	90.2833	58.4283	47.3422	58.9183	53.0442	65.3911	50.9963	9.55966e-11	5.5446e-09
AT3G18500	1176.36	1063.92	998.822	1314.31	1047.76	1117.19	1182.21	1168.68	1090.36	850.081	845.095	893.805	781.178	761.702	851.369	932.885	876.884	796.41	9.61724e-11	5.56206e-09
AT1G19000	3970.48	3184.22	3587.1	4360.91	3647.58	3117.26	4088.29	3627.45	2900.58	4720.89	4159.02	5010.72	4350.91	4194.85	5697.4	4554.88	4666.35	4924.94	9.85933e-11	5.68583e-09
AT1G14430	169.943	98.092	86.5852	97.2894	74.7553	104.37	49.9392	79.2885	63.5164	210.711	148.418	191.401	136.066	194.441	225.853	215.636	185.453	238.706	1.01761e-10	5.85182e-09
AT4G11290	333.264	112.24	86.5852	74.7687	78.315	74.5502	265.062	78.4625	120.416	271.833	299.051	408.081	220.907	290.816	457.599	577.72	389.13	340.699	1.06187e-10	6.08904e-09
AT3G18780	6788.88	4612.21	5452.8	5901.32	5510.53	6001.29	6237.59	4638.37	5773.37	7415.09	6303.32	12395.9	5722.77	6600.01	10695.6	9747.44	7066.52	12567.9	1.07904e-10	6.17001e-09
AT1G06460	3646.04	3531.31	4059.2	5360.83	3911.01	4070.44	4591.52	4179.99	4051.81	2965.23	2840.98	2964.9	3127.11	2945.36	3331.83	3145.75	3013.35	3508.98	1.18486e-10	6.75602e-09
AT5G66400	718.394	875.283	723.605	1528.7	649.066	501.616	1031.44	1315.69	598.112	251.727	402.057	195.012	365.777	256.155	277.898	252.536	302.3	317.913	1.20122e-10	6.83009e-09
AT5G03880	4130.49	4135.9	4777.65	4749.16	4587.36	4977.82	4397.53	5156.23	5189.82	4049.35	3947.47	3479.52	4021.95	4118.77	3364.23	3759.22	4126.07	3594.7	1.20681e-10	6.84262e-09
AT1G08510	3153.87	2180.66	2330.58	3746.54	2264.02	2603.93	3512.07	2283.67	2606.82	2771.41	2556.33	3845.17	2499.61	2885.34	3329.87	3228.78	3224.53	3597.95	1.21328e-10	6.8601e-09
AT4G17245	111.456	125.445	61.8466	276.554	103.233	105.435	174.787	100.762	66.1629	583.878	261.392	294.324	253.723	370.283	556.778	780.672	455.594	291.872	1.2515e-10	7.05651e-09
AT1G57770	770.26	915.84	1032.84	715.257	902.996	1065	564.697	884.562	1079.78	936.135	1007.91	708.724	948.459	925.709	595.075	932.885	876.884	511.048	1.31546e-10	7.39656e-09
AT1G68530	7528.24	7140.91	6990.72	9164.12	7336.7	7691.45	12337.9	7818.17	8372.25	11732.3	10435.8	11873.2	10805.2	9431.24	11782.7	13153.8	9802.23	13110.4	1.38017e-10	7.7389e-09
AT1G78070	2837.16	3234.21	2237.81	4281.63	3633.34	2340.88	3938.47	4806.04	2780.16	889.489	1341.3	2689.54	1459.91	1170.87	2273.26	1288.05	1002.31	3035.91	1.39016e-10	7.77338e-09
AT1G78610	1111.25	1032.8	1097.78	1056.67	997.923	1033.05	995.902	1181.07	996.413	565.381	670.095	807.133	662.721	756.629	768.884	528.135	541.352	825.706	1.41679e-10	7.87877e-09
AT4G39260	5626.87	7165.43	6318.66	6527.4	6863.25	7808.6	6789.81	7464.68	7897.2	9173.16	8692.41	7395.11	9198.05	9673.02	7748.74	7972.77	8952.14	8030.29	1.41565e-10	7.87877e-09
AT1G30250	33.1057	36.7845	14.4309	46.8431	27.2916	35.1451	25.93	44.5998	60.8698	4.82544	2.21519	0	0	0	0	18.4501	2.14397	0	1.42948e-10	7.90591e-09
AT3G12610	2248.98	1154.47	1212.19	2051.19	1378.82	1345.1	1519.3	984.498	1566.74	1363.19	1704.59	2758.16	1462.31	1786.32	2659.18	2314.34	1797.72	2675.68	1.42576e-10	7.90591e-09
AT1G22160	386.233	466.88	395.818	509.869	373.776	405.766	565.657	442.694	390.361	699.689	796.361	856.789	757.967	541.053	1150.87	514.298	515.625	1022.1	1.51235e-10	8.34139e-09
AT5G15190	90.489	122.615	61.8466	108.099	56.9564	45.7951	108.522	115.629	55.5768	19.3018	28.7975	19.8623	41.6202	16.9079	54.0084	25.3689	26.7996	23.8706	1.52468e-10	8.38656e-09
AT2G39210	164.425	192.411	276.248	154.942	397.508	490.966	384.147	271.728	395.654	905.574	642.405	497.461	647.514	549.507	402.608	679.196	633.543	366.739	1.55776e-10	8.54533e-09
AT3G48510	22.0705	67.9099	37.1079	45.0414	52.21	17.04	26.8903	87.5477	55.5768	8.0424	15.5063	14.4453	22.4109	13.5263	9.81971	6.9188	4.28794	2.17006	1.58305e-10	8.66056e-09
AT4G30660	674.253	549.881	631.866	967.489	823.495	817.922	813.432	821.792	726.468	395.686	458.544	321.409	577.88	567.261	389.843	424.353	486.681	316.828	1.60921e-10	8.77997e-09
AT2G22770	69.522	46.2164	41.231	41.4381	48.6503	33.0151	48.0184	46.2516	15.8791	106.16	104.114	96.6032	79.2384	73.5495	139.44	121.079	115.774	112.843	1.62909e-10	8.86451e-09
AT5G57490	743.775	777.191	664.85	689.133	703.649	712.487	746.206	554.193	684.124	961.871	827.374	1005.76	864.419	888.511	945.639	1080.49	987.298	1093.71	1.71166e-10	9.28885e-09
AT4G24510	860.749	649.86	737.005	987.307	862.652	964.892	956.527	704.511	747.641	969.913	903.798	1745.18	805.99	918.945	1364.94	1123.15	870.452	1523.38	1.87182e-10	1.01309e-08
AT3G25400	118.077	132.047	98.9545	107.199	150.697	153.36	111.403	193.266	144.235	110.181	99.6836	49.6558	104.05	100.602	64.8101	68.0349	70.751	45.5712	1.88629e-10	1.01819e-08
AT5G43860	134.63	187.695	144.309	201.785	166.123	140.58	188.232	208.132	172.023	61.1222	75.3165	97.506	106.452	70.1679	84.4495	92.2507	100.767	113.928	2.02613e-10	1.09077e-08
AT1G12500	773.57	411.232	575.173	750.39	573.124	613.441	649.209	480.686	505.484	714.165	639.082	1561.9	552.267	667.017	1082.13	1007.84	654.983	1183.77	2.03258e-10	1.09134e-08
AT1G12880	125.802	250.889	274.186	168.455	217.146	220.456	173.827	412.135	280.531	98.9215	223.734	90.2833	152.874	117.51	76.5938	132.61	147.934	86.8022	2.0691e-10	1.10801e-08
AT1G13260	872.888	253.719	513.326	862.993	455.651	583.621	896.024	485.642	681.478	1407.42	836.234	1085.21	800.388	1347.56	3446.72	1072.41	1074.13	1532.06	2.17541e-10	1.16187e-08
AT4G09820	121.388	594.211	232.955	45.9422	128.152	173.595	193.034	262.643	173.347	36.995	158.386	7.22267	115.256	47.3422	7.85577	23.0627	27.8716	8.68022	2.22169e-10	1.18346e-08
AT5G48485	169.943	286.731	197.909	207.19	189.855	155.49	242.973	208.132	234.217	363.516	301.266	396.344	347.368	312.797	467.418	369.003	340.891	372.165	2.30665e-10	1.22549e-08
AT2G22470	207.463	127.331	123.693	165.752	135.271	119.28	211.281	176.747	111.154	61.1222	90.8228	124.591	67.2326	71.0133	78.5577	53.0442	72.895	49.9113	2.38804e-10	1.26541e-08
AT1G43620	932.478	1050.72	996.76	1186.39	913.675	1052.22	1150.52	1145.55	1096.98	757.594	676.741	806.23	761.969	652.646	821.91	727.628	779.333	684.653	2.44156e-10	1.2904e-08
AT1G17620	832.057	420.664	565.896	839.572	562.444	634.741	816.313	456.735	633.84	447.157	557.12	1011.17	497.841	579.096	803.253	680.349	488.825	1164.23	2.5204e-10	1.32859e-08
AT1G13640	436.996	485.744	524.665	444.108	460.398	410.026	430.245	421.22	486.959	738.292	642.405	646.429	697.138	579.942	756.118	627.305	665.703	730.224	2.72158e-10	1.43091e-08
AT2G14900	300.159	182.979	175.232	247.728	164.936	193.83	225.687	161.881	168.054	168.89	276.899	452.319	233.713	238.402	462.509	262.915	184.381	367.824	2.73797e-10	1.4358e-08
AT5G47490	808.883	662.121	720.512	720.662	741.62	781.712	756.771	813.533	758.227	543.666	506.171	584.133	553.068	527.527	556.778	589.252	490.969	583.745	2.75407e-10	1.44051e-08
AT3G47860	1357.33	789.452	877.19	1525.1	1457.13	1329.12	1125.55	1455.27	1536.3	620.069	379.905	822.481	605.093	683.08	762.01	716.096	657.127	874.532	2.94449e-10	1.53614e-08
AT5G23860	1148.77	717.769	1028.71	1122.43	965.886	1001.1	926.756	665.693	903.785	1552.99	1391.14	1802.96	1205.38	1525.09	1723.36	2053.73	1390.36	1550.5	2.96181e-10	1.54121e-08
AT1G55960	864.059	700.792	717.42	992.712	781.964	626.221	758.691	778.018	637.81	973.13	897.152	1475.23	851.612	774.383	1523.04	934.039	881.171	1139.28	3.05e-10	1.58303e-08
AT2G05380	4671.22	8390.64	4441.61	4657.28	6364.88	4446.39	8718.23	8734.12	5680.74	11612.4	14348.9	11094	15386.6	13082.5	11825.9	9301.18	17888.2	12383.4	3.18434e-10	1.64853e-08
AT1G65450	187.599	76.3986	180.386	194.579	132.898	203.415	506.114	198.221	239.51	84.4452	85.2848	95.7003	100.849	72.7041	74.6298	78.4131	68.607	58.5915	3.21864e-10	1.65781e-08
AT4G04955	254.914	409.346	292.74	376.546	344.112	363.166	652.09	356.798	443.291	1729.12	676.741	557.048	918.045	975.587	960.368	1299.58	1368.92	762.775	3.21087e-10	1.65781e-08
AT4G36690	2691.5	3142.72	2601.68	2551.14	2615.25	2687	2691.91	2823	2719.29	3525.79	3483.39	3192.42	3488.89	3391.73	3634.28	3318.72	3518.25	3282.21	3.2824e-10	1.68635e-08
AT4G14200	324.436	364.072	387.572	263.943	355.977	339.736	277.547	367.535	310.966	253.336	314.557	217.583	328.959	273.908	225.853	199.492	227.261	139.969	3.3136e-10	1.69378e-08
AT4G21880	114.767	114.126	117.508	107.199	112.726	120.345	93.1558	90.8514	55.5768	164.065	132.911	150.773	158.477	185.987	202.286	207.564	168.302	187.71	3.30669e-10	1.69378e-08
AT2G45970	929.167	705.508	627.743	944.068	720.261	673.082	731.801	606.226	599.436	710.144	678.956	1319.94	807.591	737.185	943.675	1070.11	737.526	1220.66	3.34739e-10	1.70675e-08
AT1G77690	390.648	172.604	178.324	187.372	161.376	152.295	250.656	169.314	213.044	218.753	208.228	483.919	214.504	247.701	410.464	295.202	284.076	377.59	3.37955e-10	1.71882e-08
AT2G25730	1585.76	1446.86	1578.12	1951.19	1574.61	1591.11	1587.49	1663.41	1816.83	1175.8	1225	1213.41	1099.73	1141.28	1346.28	1124.31	1313.18	1458.28	3.56311e-10	1.80763e-08
AT3G29320	11532.9	9799.77	11904.4	14322.3	12524.5	11792.8	11796.2	13443.5	12514	8819.29	9015.82	7691.24	9693.49	9459.98	8476.38	8625.44	9149.39	7893.58	3.63644e-10	1.83694e-08
AT4G27520	7772.12	6591.97	6343.4	8549.76	7536.04	5838.34	6833.98	8616.01	5626.49	2421.57	3762.5	5630.07	3855.47	3413.71	3110.89	3128.45	2766.79	5090.95	3.63903e-10	1.83694e-08
AT4G30210	2807.37	2157.08	2460.46	2387.19	2390.98	2414.36	3037.65	2125.1	2540.65	3847.48	3706.01	3419.93	3447.27	3379.89	3669.63	3527.44	3043.36	3629.42	3.65067e-10	1.83823e-08
AT5G61440	30.8987	5.65915	44.3234	27.0248	21.3586	29.8201	15.3659	22.2999	18.5256	110.985	64.2405	140.842	68.0329	98.0659	292.627	69.188	86.8308	100.908	3.67006e-10	1.84341e-08
AT5G52070	131.319	115.069	107.201	79.2729	90.181	93.7202	105.641	107.37	71.4559	186.584	125.158	200.429	149.672	147.099	238.619	186.808	147.934	195.305	3.69219e-10	1.84994e-08
AT1G18710	342.093	989.409	576.204	524.282	587.363	430.261	576.221	821.792	505.484	224.383	334.494	175.15	313.752	202.895	357.438	139.529	209.037	183.37	3.90477e-10	1.95161e-08
AT5G21326	769.156	647.03	836.99	941.365	774.844	840.287	815.353	822.618	771.459	1027.82	1048.89	1435.5	1015.69	980.659	1226.48	1078.18	954.066	1485.4	4.63338e-10	2.31007e-08
AT5G01740	64.0044	67.9099	53.6003	45.0414	18.9855	25.5601	63.3843	22.2999	43.6675	105.355	199.367	138.133	139.267	120.892	123.728	55.3504	85.7588	68.3568	4.66057e-10	2.31792e-08
AT5G57050	654.39	799.827	481.372	765.704	569.564	496.291	805.749	969.632	498.868	238.055	448.576	343.979	396.192	273.063	349.582	238.699	216.541	360.229	5.05352e-10	2.50719e-08
AT3G55110	260.432	421.607	409.218	240.521	361.91	381.271	324.605	332.02	346.693	186.584	310.127	116.465	299.345	317.869	109.981	208.717	210.109	108.503	5.28267e-10	2.61447e-08
AT1G15750	2509.41	2827.69	2510.97	2643.03	2555.92	2447.38	2438.38	2327.45	2614.76	3788.77	3604.11	3441.6	3097.5	3058.64	3704	3137.68	3187.01	3684.75	5.7867e-10	2.84998e-08
AT5G48250	115.87	110.354	98.9545	140.529	110.353	110.76	119.086	150.318	161.437	56.2968	44.3038	45.1417	44.8217	59.1777	38.2969	103.782	68.607	46.6562	5.78533e-10	2.84998e-08
AT2G23600	1463.27	1176.16	1948.17	1500.78	1534.26	1796.66	1574.04	1481.7	1945.19	3242.69	2152.06	2692.25	2225.08	2684.98	2708.28	3740.77	3128.05	2759.23	6.00189e-10	2.94165e-08
AT3G03990	747.086	509.324	539.096	726.968	614.654	642.196	754.85	687.167	615.315	1035.86	733.228	993.117	878.826	972.205	1322.72	973.245	1077.34	961.335	5.99527e-10	2.94165e-08
AT1G01490	1068.21	1059.21	1094.68	1305.3	819.935	1069.26	1497.21	1008.45	1189.61	2242.22	1893.99	1519.47	1718.43	1857.34	2127.93	2019.14	1992.82	1821.76	6.44311e-10	3.14288e-08
AT4G30280	34.2093	1.88638	2.06155	39.6364	0	0	36.494	0	2.64652	4.82544	8.86076	52.3643	3.20155	5.07238	17.6755	9.22507	4.28794	60.7616	6.44351e-10	3.14288e-08
AT1G70560	125.802	141.479	145.339	104.496	172.056	191.7	145.016	171.792	121.74	260.574	234.81	238.348	229.711	240.938	277.898	386.3	303.372	248.471	6.49512e-10	3.16044e-08
AT2G47670	48.5551	50.9324	53.6003	93.6861	52.21	31.9501	88.3539	80.1144	67.4861	6.43392	15.5063	9.02833	30.4147	23.6711	13.7476	18.4501	21.4397	13.0203	6.52911e-10	3.16936e-08
AT3G15820	410.511	361.243	346.341	397.265	366.657	355.711	399.513	330.369	330.814	482.544	406.487	776.437	437.812	410.862	624.534	648.061	452.378	629.316	6.67449e-10	3.23218e-08
AT1G18265	94.9031	87.7169	86.5852	93.6861	81.8748	72.4202	72.988	83.4181	91.3048	33.7781	48.7342	21.668	22.4109	33.8158	37.3149	39.2066	30.0156	15.1904	6.72769e-10	3.25017e-08
AT3G03520	363.059	249.946	209.248	298.174	231.385	256.666	406.236	213.914	250.096	314.458	341.139	486.627	368.979	346.612	430.103	408.209	289.436	506.708	7.16951e-10	3.45536e-08
AT3G56590	759.225	764.929	804.005	633.282	736.873	859.457	789.423	606.226	701.327	1113.07	1249.37	1485.16	897.234	1046.6	1298.17	1040.13	947.635	1500.59	7.26111e-10	3.4912e-08
AT5G59220	225.119	249.946	187.601	376.546	315.633	141.645	366.861	902.732	175.993	30.5611	76.4241	23.4737	117.657	91.3028	45.1707	18.4501	73.9669	48.8263	7.30956e-10	3.50617e-08
AT5G45650	1263.54	850.76	1039.02	1452.13	1339.66	1104.41	1318.59	1168.68	1227.98	1631.8	1195.1	1904.98	1285.42	1428.72	2103.38	1606.32	1443.96	2580.2	7.39946e-10	3.5409e-08
AT5G48480	647.769	968.659	735.974	613.464	761.792	716.747	530.124	650	651.043	431.877	544.937	424.332	497.041	564.725	503.751	461.254	496.329	286.447	7.51418e-10	3.58731e-08
AT3G10940	1275.67	1079.96	1780.15	1518.8	1425.1	1457.99	1220.63	1560.99	1523.07	771.266	1157.44	389.121	1115.74	953.607	456.617	634.224	767.541	352.634	7.5489e-10	3.59541e-08
AT1G29700	1320.92	1300.66	1458.55	1487.27	1427.47	1489.94	1521.22	1457.75	1392.07	1064.01	1128.64	998.534	1123.74	1005.18	988.845	1183.12	1059.12	870.192	7.60565e-10	3.61393e-08
AT1G58602	4181.25	4461.3	5717.71	4352.8	6138.24	8053.55	6859.91	5613.79	8152.59	10728.6	9381.33	7191.07	7618.09	8374.49	7824.35	9185.87	9734.69	8684.56	7.71365e-10	3.64812e-08
AT4G20260	5369.75	3596.39	4062.29	7376.88	4172.06	5105.62	5817.91	3574.59	5278.47	6748.38	4500.16	10504.5	4591.02	6408.95	8644.29	9471.84	6707.41	10164.5	7.70333e-10	3.64812e-08
AT5G64570	190.91	156.57	148.432	290.067	213.586	208.74	217.043	169.314	165.407	526.777	276.899	425.234	207.3	413.399	512.589	514.298	538.136	415.566	7.91456e-10	3.73442e-08
AT1G65900	466.791	379.163	474.157	436.001	552.952	395.116	339.971	480.686	336.107	136.721	212.658	202.235	304.948	243.474	131.584	154.52	167.23	192.05	8.0516e-10	3.79024e-08
AT1G26945	414.925	217.877	284.494	481.042	415.307	309.916	428.324	292.376	234.217	199.451	184.968	189.595	190.492	173.306	178.719	235.239	177.949	200.73	8.15035e-10	3.82783e-08
AT3G02140	13.2423	6.60235	2.06155	9.00828	14.2391	4.26001	5.76221	9.08514	5.29303	93.2918	33.2279	37.919	40.0194	49.033	51.0625	28.8284	55.7432	28.2107	8.48286e-10	3.97477e-08
AT5G21940	236.154	179.207	159.77	165.752	122.219	149.1	169.025	185.006	115.123	893.51	489.557	363.842	649.114	1292.61	3876.82	538.514	772.901	329.848	8.57796e-10	4.01005e-08
AT3G59570	220.705	235.798	176.263	181.967	231.385	256.666	255.458	249.428	246.126	125.461	135.127	89.3805	124.86	117.51	79.5397	157.979	183.309	82.4621	8.95931e-10	4.17867e-08
AT5G49440	1990.76	1596.82	1770.87	1651.22	1770.39	1693.35	1605.74	1525.48	1618.34	1980.84	2216.3	2701.28	1730.44	2179.43	2808.44	2338.56	2424.83	2636.62	9.1154e-10	4.2417e-08
AT3G54690	733.844	492.346	526.726	647.695	525.66	523.981	685.703	460.038	497.545	563.772	542.722	1096.04	533.058	572.333	738.443	794.509	653.911	914.678	9.29787e-10	4.31621e-08
AT4G01985	66.2115	35.8413	115.447	83.777	52.21	72.4202	30.7318	195.743	64.8396	6.43392	2.21519	17.1538	8.00388	16.0625	5.89183	8.07194	4.28794	8.68022	9.31817e-10	4.31621e-08
AT3G26932	377.405	406.516	326.756	360.331	341.738	320.566	353.416	323.761	301.703	492.195	430.854	557.048	482.634	381.274	642.209	491.235	396.634	467.647	9.59795e-10	4.43565e-08
AT3G49870	989.861	863.021	776.174	982.803	774.844	771.062	994.942	871.347	809.834	1091.35	1085.44	1222.44	1030.1	1021.24	1039.91	1305.35	1056.98	1238.02	9.7711e-10	4.50539e-08
AT4G16590	6.62115	39.6141	144.309	36.0331	21.3586	36.2101	143.095	92.5032	38.3745	1.60848	8.86076	0	3.20155	0	0	0	1.07198	2.17006	9.9538e-10	4.5792e-08
AT5G22860	880.612	1330.84	1180.24	906.233	900.623	816.857	953.646	1297.52	1028.17	705.318	773.101	540.797	889.231	732.958	612.75	471.632	604.599	624.976	1.00919e-09	4.63222e-08
AT4G00780	2928.75	4478.28	4536.44	2913.28	4179.18	4141.79	2289.52	3663.79	3751.44	3539.46	4052.69	3084.08	3443.27	3716.36	2722.02	2594.55	3430.35	2482.54	1.01709e-09	4.65636e-08
AT5G07110	172.15	97.1488	129.878	174.761	119.846	124.605	223.766	118.933	121.74	104.551	134.019	341.271	105.651	113.283	195.412	174.123	151.15	271.257	1.01905e-09	4.65636e-08
AT5G51670	145.665	98.092	63.9081	105.397	62.8894	70.2902	90.2747	44.5998	66.1629	94.9003	98.576	204.04	78.438	69.3225	155.151	121.079	85.7588	152.989	1.0416e-09	4.74868e-08
AT5G40990	3.31057	0	0	0	0	0	0	4.95553	0	94.0961	88.6076	4.51417	84.8411	18.5987	1.96394	48.4316	21.4397	4.34011	1.06731e-09	4.85494e-08
AT1G17940	476.722	600.814	496.834	651.299	504.301	469.666	498.431	744.155	526.657	317.675	328.956	344.882	379.384	308.57	326.996	330.949	375.195	314.658	1.14099e-09	5.17848e-08
AT5G52300	110.352	32.0685	53.6003	227.909	56.9564	29.8201	53.7806	211.436	23.8186	11.2594	8.86076	5.417	17.6085	6.76317	15.7115	2.30627	8.57588	8.68022	1.16099e-09	5.25745e-08
AT5G24470	342.093	298.992	287.586	463.026	278.849	310.981	296.754	408.005	383.745	116.615	46.519	40.6275	80.0388	133.573	66.7741	117.62	205.821	34.7209	1.20775e-09	5.45698e-08
AT3G48140	3371.27	2881.45	3175.82	3334.86	3517.06	3436.76	3675.33	3456.48	3559.56	4297.05	3834.49	4614.38	3858.67	4017.32	3881.73	4339.24	4297.59	4533.25	1.22021e-09	5.50099e-08
AT3G53480	711.773	32.0685	25.7694	251.331	83.0614	25.5601	171.906	66.8996	27.7884	19.3018	22.1519	110.146	17.6085	27.0527	33.387	64.5755	30.0156	60.7616	1.25957e-09	5.66583e-08
AT3G26200	45.2445	76.3986	39.1695	34.2315	30.8514	78.8102	153.659	24.7776	80.7187	1538.51	561.551	216.68	498.641	973.051	564.634	1221.17	1807.37	201.815	1.27936e-09	5.7421e-08
AT1G75750	693.013	166.002	213.371	487.348	371.403	255.601	222.806	165.184	239.51	493.803	173.892	3758.49	192.093	368.593	1496.52	1405.67	449.162	4570.14	1.34319e-09	6.01523e-08
AT1G29660	4372.16	2374.02	3690.18	4723.04	3403.14	4324.97	5064.02	2123.44	4345.58	5585.45	3957.44	11057.9	5270.55	5895.79	8346.76	9069.4	5213.06	10536.7	1.42091e-09	6.34924e-08
AT5G62530	1719.29	1629.84	1969.81	1658.42	1611.39	1708.26	1624.94	1779.86	1847.27	1138	1593.83	1078.89	1526.34	1387.29	1074.28	1097.78	1316.4	1049.22	1.44354e-09	6.43614e-08
AT3G58490	402.786	624.393	426.741	525.183	492.435	493.096	548.371	508.768	452.554	938.548	808.544	678.028	733.955	818.343	727.641	985.93	901.539	630.401	1.53813e-09	6.84284e-08
AT3G57550	382.923	331.061	373.141	388.257	307.327	340.801	356.297	313.85	383.745	606.397	444.146	593.161	429.808	492.02	558.742	546.586	466.313	619.551	1.5441e-09	6.85429e-08
AT4G24520	2156.29	2125.96	1978.06	2349.36	2103.83	2063.97	2419.17	2167.22	2273.36	2885.61	2593.99	2582.1	2714.11	2564.93	2634.63	2893.21	3064.8	2859.05	1.55745e-09	6.89846e-08
AT3G05890	86.0749	18.8638	16.4924	108.099	62.8894	35.1451	66.2654	26.4295	26.4652	27.3442	24.3671	84.8663	20.8101	25.3619	45.1707	48.4316	17.1518	65.1017	1.59507e-09	7.03431e-08
AT3G08770	1054.97	1754.34	1153.44	708.051	1140.31	1160.85	1036.24	1321.47	999.059	456.004	1075.47	357.522	1007.69	817.498	491.968	600.783	545.64	243.046	1.59479e-09	7.03431e-08
AT4G12470	103.731	77.3418	51.5388	32.4298	74.7553	68.1602	11.5244	47.0775	25.1419	279.071	171.677	1001.24	142.469	306.879	544.994	192.573	396.634	703.098	1.6135e-09	7.10011e-08
AT2G34850	86.0749	94.3192	135.032	93.6861	74.7553	79.8752	133.491	161.055	103.214	23.323	66.4557	46.9473	49.624	39.7336	35.351	16.1439	41.8074	30.3808	1.62398e-09	7.13072e-08
AT3G19620	463.48	416.891	634.958	488.249	561.258	471.796	363.019	650.826	383.745	205.081	290.19	207.652	360.975	307.724	305.393	147.601	277.644	121.523	1.69526e-09	7.4276e-08
AT3G58570	721.705	722.485	844.205	791.828	696.529	730.592	638.645	802.796	812.48	483.348	534.968	455.931	599.49	650.11	549.904	460.1	514.553	573.98	1.70542e-09	7.45596e-08
AT1G67660	485.551	478.199	657.635	653.1	653.812	596.401	520.52	650.826	541.212	303.198	375.475	332.243	466.626	426.08	327.978	304.427	299.084	366.739	1.77436e-09	7.74063e-08
AT1G18060	2260.02	2010.89	2617.14	2025.06	2373.18	2493.17	1720.02	2504.19	2332.9	1775.76	1937.18	1324.46	1812.88	1875.93	1102.75	2039.89	1895.27	1338.92	1.89965e-09	8.25164e-08
AT1G66940	665.425	551.768	876.16	570.224	753.486	1007.49	683.782	509.594	971.271	1838.49	1247.15	854.08	1243	1487.05	1043.84	1727.39	1807.37	942.889	1.89732e-09	8.25164e-08
AT5G61270	806.676	779.077	735.974	907.134	605.162	685.862	945.963	764.803	682.801	890.293	791.93	1180.91	751.564	719.432	1104.72	796.816	853.3	1190.28	1.9708e-09	8.54238e-08
AT3G22750	171.046	134.877	173.17	141.43	123.406	96.9152	127.729	117.281	136.296	164.065	232.595	195.915	149.672	207.122	235.673	288.284	240.125	301.638	2.02297e-09	8.74976e-08
AT5G40800	135.733	393.311	185.54	182.868	256.304	120.345	125.808	307.243	164.084	42.6247	114.082	46.0445	91.2442	76.931	49.0986	17.297	38.5915	47.7412	2.05675e-09	8.87693e-08
AT5G57655	1601.21	1367.63	1054.48	2270.09	1428.66	1295.04	1552.92	1364.42	1290.18	1946.26	1365.66	2423.2	1571.96	1614.71	1646.77	2367.38	2469.85	2576.94	2.06837e-09	8.90806e-08
AT2G02100	1555.97	1283.68	1194.67	1589.96	1267.28	1268.42	981.497	1262.83	1271.65	536.428	645.728	968.74	564.273	871.603	939.747	479.704	845.796	628.231	2.08154e-09	8.94575e-08
AT5G56550	24.2775	37.7277	32.9848	34.2315	16.6123	25.5601	28.8111	24.7776	26.4652	111.789	81.962	58.6842	108.052	191.905	447.779	85.3319	100.767	32.5508	2.11015e-09	9.03035e-08
AT5G67385	2205.94	1786.41	1844.06	1863.81	1579.35	1484.61	1576.93	1245.49	1597.17	1822.41	1823.1	2941.43	1796.87	1738.13	2935.11	2478.09	2027.12	2681.1	2.10991e-09	9.03035e-08
AT2G16750	399.476	194.298	264.909	319.794	240.878	264.121	232.409	226.302	239.51	123.853	186.076	212.166	145.671	176.688	179.701	147.601	160.798	180.115	2.19996e-09	9.39487e-08
AT5G27420	88.2819	76.3986	43.2926	52.248	66.4491	104.37	237.211	112.325	148.205	825.954	581.487	101.117	573.077	330.55	286.736	325.184	386.987	167.094	2.2151e-09	9.43961e-08
AT5G25610	24755.4	21857.5	28671	35249.4	24391.6	26079.8	43839.9	36194.4	28198.6	16381.6	19315.4	17586.3	22467.7	15731.1	18571	18579.3	17375.8	20975.8	2.24637e-09	9.55276e-08
AT1G21120	19.8634	24.523	7.21543	21.6199	16.6123	27.6901	65.3051	18.1703	68.8094	255.748	294.62	43.336	212.903	136.109	54.9904	166.051	184.381	73.7819	2.32379e-09	9.8406e-08
AT4G37800	2832.75	837.555	2164.63	2826.8	1338.48	1928.72	2233.82	869.695	1611.73	2002.56	2626.11	4699.25	1534.34	2964.8	3948.51	4681.72	2417.33	4405.21	2.32199e-09	9.8406e-08
AT1G05675	4.4141	18.8638	14.4309	7.20662	7.11955	12.78	40.3355	8.25921	44.9908	154.414	116.297	36.1133	73.6357	81.158	29.4591	79.5663	118.99	19.5305	2.32982e-09	9.84364e-08
AT4G27640	1180.77	1286.51	1067.88	1099.91	1210.32	1112.93	1177.41	1171.16	1239.89	1595.61	1486.39	2074.71	1341.45	1511.57	1671.32	1756.22	1550.09	1902.05	2.33423e-09	9.84364e-08
AT4G02660	112.559	126.388	197.909	121.612	149.511	185.31	124.848	225.477	205.105	100.53	129.589	72.2267	119.258	112.438	83.4676	106.088	117.918	94.3974	2.37286e-09	9.96502e-08
AT4G32480	103.731	129.217	74.2159	75.6695	68.8223	74.5502	59.5429	97.4587	52.9303	242.88	172.785	211.263	165.68	308.57	812.09	121.079	207.965	199.645	2.36875e-09	9.96502e-08
AT1G57990	334.368	207.502	212.34	364.835	224.266	347.191	381.266	127.192	453.877	1522.43	688.924	716.85	610.696	841.169	1076.24	1466.79	1277.81	687.908	2.40075e-09	1.00405e-07
AT4G01950	911.511	514.04	477.249	1179.18	608.721	679.472	852.807	498.031	774.106	480.935	449.684	1199.87	495.44	600.231	794.415	739.159	556.36	1133.85	2.39919e-09	1.00405e-07
AT4G29590	873.991	765.872	1066.85	1007.13	1080.98	1121.45	916.192	1099.3	960.685	666.715	722.152	641.012	817.996	776.074	588.201	699.952	689.286	656.442	2.4075e-09	1.0048e-07
AT3G16690	77.2467	86.7737	39.1695	72.0662	98.4871	51.1201	65.3051	54.5108	58.2233	141.546	122.943	145.356	139.267	137.8	102.125	182.195	146.862	124.778	2.53403e-09	1.05543e-07
AT1G08650	1457.76	824.35	1189.52	1353.94	1591.22	1397.28	1476.09	1238.06	1362.96	636.958	703.323	981.38	705.942	510.619	421.266	999.767	702.15	981.95	2.56326e-09	1.06105e-07
AT2G19310	527.485	627.223	508.173	640.489	541.086	580.426	773.097	540.153	670.892	1047.12	1167.41	1268.48	921.246	858.922	995.719	697.646	731.094	1550.5	2.56076e-09	1.06105e-07
AT3G15630	111.456	65.0803	51.5388	117.108	87.8078	76.6802	77.7899	39.6442	34.4047	344.215	77.5317	243.765	97.6473	179.224	542.048	394.372	415.93	208.325	2.55899e-09	1.06105e-07
AT3G03640	528.588	479.142	439.111	610.761	506.675	527.176	707.792	553.367	471.08	332.151	366.614	389.121	428.207	377.892	386.897	405.903	316.236	359.144	2.71143e-09	1.1201e-07
AT5G47080	421.546	436.698	376.233	397.265	329.872	319.501	464.818	399.746	393.007	525.169	443.038	599.481	475.43	465.813	591.147	418.588	420.218	622.806	2.79572e-09	1.15257e-07
AT5G59320	1464.38	2138.22	3303.64	2883.55	1237.61	2021.37	3066.46	4046.19	2175.44	55.4925	405.38	12.6397	470.628	177.533	45.1707	96.8633	120.062	17.3604	2.93222e-09	1.20638e-07
AT5G46570	558.383	556.484	571.05	581.034	643.133	631.546	516.678	593.838	604.729	357.887	384.335	489.336	382.585	346.612	385.915	387.453	338.747	458.967	2.95954e-09	1.21515e-07
AT2G36630	750.396	576.291	552.496	853.084	607.535	545.281	672.258	522.808	651.043	1022.19	909.336	4645.98	938.855	889.357	1802.9	919.048	702.15	4654.77	2.96883e-09	1.2165e-07
AT2G40960	436.996	610.246	481.372	563.918	577.87	554.866	329.406	537.675	506.808	372.363	309.019	153.482	373.781	401.563	258.258	294.049	421.29	189.88	3.09783e-09	1.26679e-07
AT2G43920	283.606	476.312	357.679	314.389	454.465	423.871	295.794	414.613	385.068	675.561	692.247	343.077	589.085	452.287	389.843	439.344	552.072	342.869	3.20463e-09	1.30782e-07
AT2G42810	744.879	729.088	792.667	826.059	810.442	790.232	778.859	731.766	662.952	913.616	946.994	1346.12	938.054	975.587	1172.47	947.876	927.267	1357.37	3.34442e-09	1.36213e-07
AT2G28160	92.696	92.4329	65.9697	83.777	121.032	149.1	108.522	123.888	111.154	65.9477	35.443	37.919	72.0349	42.2698	30.4411	39.2066	49.3113	17.3604	3.41806e-09	1.3863e-07
AT3G06080	658.804	541.392	710.205	857.588	709.582	885.017	676.1	516.201	776.752	1195.1	777.532	1416.55	785.18	842.86	1429.75	1479.47	1427.88	1475.64	3.41891e-09	1.3863e-07
AT3G21580	406.097	381.05	488.588	416.182	487.689	526.111	393.751	502.16	520.04	354.67	336.709	328.631	370.579	412.553	334.852	311.346	361.259	290.787	3.42432e-09	1.3863e-07
AT4G27595	548.452	557.427	586.511	665.712	613.468	571.906	626.16	517.853	576.94	380.405	406.487	399.955	356.973	431.152	372.167	476.244	428.794	347.209	3.43848e-09	1.38925e-07
AT2G20560	161.115	122.615	86.5852	113.504	88.9944	110.76	157.5	120.585	140.265	230.013	235.918	270.85	163.279	219.803	273.97	139.529	147.934	385.185	3.52772e-09	1.42247e-07
AT3G10985	584.868	545.165	661.758	753.993	574.31	803.012	945.003	665.693	796.601	1709.81	1149.68	974.157	1118.94	1213.14	967.242	1243.08	1322.83	1265.14	3.63551e-09	1.46302e-07
AT1G27200	580.454	683.815	491.68	862.092	567.191	532.501	736.603	857.306	538.566	334.564	328.956	375.579	385.787	377.047	730.587	303.274	328.027	461.137	3.65138e-09	1.46649e-07
AT1G02205	2749.98	1646.81	2936.68	4411.35	2341.15	2975.62	3124.08	2713.15	2368.63	634.545	1301.42	482.113	1090.13	815.807	502.769	801.428	574.584	235.451	3.70462e-09	1.48493e-07
AT2G16600	10918.3	11012.7	12060.1	9978.47	11645.2	13178.3	12755.6	12582.9	13685.1	9368.59	10176.6	5206.64	10211.3	10350.2	6672.5	8171.11	10114.2	5541.24	3.85002e-09	1.54016e-07
AT2G30930	695.22	350.868	488.588	759.398	347.671	567.646	667.456	242.821	504.161	1192.69	619.146	1357.86	585.083	967.978	1358.07	1481.78	913.331	1312.88	3.87691e-09	1.54786e-07
AT2G23070	1440.1	1293.12	1503.9	1326.92	1273.21	1506.98	1285.93	1250.45	1384.13	1650.3	1718.99	1963.66	1419.89	1537.78	1675.24	1855.39	1725.9	2052.87	3.93105e-09	1.56638e-07
AT2G39850	3125.18	3946.32	4207.63	2349.36	3877.78	3605.03	2108.01	3690.22	3427.24	2875.16	3810.13	2463.83	2793.35	3282.67	2459.84	1559.04	2518.09	1679.62	3.98255e-09	1.58379e-07
AT2G15290	2298.64	1828.85	2544.99	2225.04	2453.87	2538.97	1959.15	2426.56	2449.35	1662.36	1643.67	1629.61	1776.06	1762.65	1284.42	1698.57	1847.03	1341.09	4.03362e-09	1.60074e-07
AT5G03540	1118.97	843.214	994.699	1186.39	1050.13	1172.57	1223.51	955.591	1028.17	1341.47	1207.28	1444.53	1172.57	1217.37	1439.57	1346.86	1316.4	1402.94	4.041e-09	1.60074e-07
AT1G15830	237.258	124.501	154.616	258.538	221.893	172.53	186.312	206.48	182.61	344.215	166.139	547.117	247.32	241.783	406.536	386.3	322.667	444.861	4.09178e-09	1.61769e-07
AT1G03310	2861.44	2677.72	3461.35	3036.69	3177.69	3110.87	2993.47	3433.36	3208.9	2038.75	2342.56	2228.19	2647.68	2197.18	2205.51	2120.61	2076.43	2324.13	4.19207e-09	1.65089e-07
AT2G30695	706.256	753.611	816.375	666.613	886.384	855.197	527.242	733.418	764.843	669.128	706.646	521.838	615.498	630.665	509.643	605.395	803.989	568.555	4.19113e-09	1.65089e-07
AT3G11660	941.306	841.328	821.528	1308	1039.45	1041.57	1507.78	904.384	940.836	1285.98	1129.75	1403	1017.29	1071.96	1568.21	1279.98	1063.41	1486.49	4.33805e-09	1.70506e-07
AT1G01940	145.665	168.831	141.216	136.926	125.779	176.79	128.689	145.362	132.326	232.425	234.81	260.919	206.5	245.165	241.565	205.258	215.469	234.366	4.36364e-09	1.7118e-07
AT1G01120	1614.46	554.597	797.821	1871.92	969.445	1118.25	1442.47	768.933	1241.22	1143.63	882.753	4355.27	1078.92	1133.68	1679.17	2433.11	1023.75	3460.15	4.48791e-09	1.75714e-07
AT3G14440	247.189	207.502	256.663	324.298	316.82	199.155	282.348	400.572	149.528	100.53	76.4241	36.1133	153.674	140.336	158.097	136.07	132.926	104.163	4.54176e-09	1.77479e-07
AT1G58370	112.559	58.4779	73.1851	65.7604	92.5541	118.215	75.8691	75.9848	83.3652	231.621	181.646	219.388	118.457	165.698	202.286	171.817	152.222	169.264	4.55431e-09	1.77627e-07
AT1G72140	143.458	35.8413	30.9233	75.6695	41.5307	27.6901	55.7014	39.6442	18.5256	65.9477	63.1329	144.453	51.2248	59.1777	110.963	99.1695	58.9592	105.248	4.73274e-09	1.8411e-07
AT5G54940	3129.59	4092.51	3757.18	3499.72	3629.78	4090.67	4453.23	3411.06	4368.07	6991.26	5767.25	5194.9	5258.55	4809.46	5477.44	5759.9	6357.94	5313.38	4.73873e-09	1.8411e-07
AT5G39590	1878.2	1394.04	1652.33	2037.67	1756.16	1574.07	1680.65	1794.73	1433.09	956.241	1150.79	971.449	1226.99	1045.75	950.548	1282.29	1089.14	954.825	4.91395e-09	1.90552e-07
AT1G27180	199.738	262.208	283.463	196.38	242.065	283.291	224.726	214.74	301.703	185.779	193.829	161.607	178.486	180.915	118.819	178.736	246.556	158.414	5.11708e-09	1.9805e-07
AT2G40100	898.269	695.133	1286.41	960.283	1082.17	1670.99	1075.61	1342.95	1695.09	744.726	835.127	466.765	1030.1	743.103	403.59	822.185	981.938	537.089	5.14484e-09	1.98744e-07
AT3G27770	1139.94	1067.69	1037.99	1373.76	1034.71	1027.73	996.863	881.258	1237.25	1631.8	1406.65	1714.48	1267.01	1555.53	1596.69	2225.55	1736.62	1810.91	5.17373e-09	1.99479e-07
AT5G57800	1274.57	913.01	1115.3	1282.78	919.608	1084.17	1266.73	818.488	1094.33	1098.59	1179.59	2196.59	1082.12	1153.97	1751.84	1577.49	1069.84	2110.38	5.29743e-09	2.0386e-07
AT1G35140	50.7621	0	16.4924	18.0166	2.37318	9.58502	19.2074	4.95553	2.64652	6.43392	2.21519	75.838	6.4031	11.8355	76.5938	11.5313	6.43191	71.6118	5.30807e-09	2.03882e-07
AT3G27210	278.088	275.412	266.971	354.926	256.304	297.136	387.989	387.357	285.824	160.848	165.032	134.522	207.3	148.79	104.089	142.989	132.926	209.41	5.3996e-09	2.07005e-07
AT4G01750	66.2115	51.8756	22.6771	39.6364	72.3821	91.5902	74.9088	54.5108	87.335	318.479	202.69	95.7003	151.273	223.185	132.566	275.599	227.261	137.799	5.43685e-09	2.08039e-07
AT4G15440	292.434	996.954	550.434	449.513	758.232	563.386	739.484	983.672	502.838	364.321	495.095	189.595	447.417	284.898	216.034	219.095	339.819	215.921	5.50936e-09	2.10416e-07
AT3G23550	13.2423	49.9892	35.0464	8.10745	20.1721	28.7551	325.565	16.5184	83.3652	2922.61	1442.09	92.9918	1120.54	949.38	456.617	2222.09	1549.02	273.427	5.56081e-09	2.11981e-07
AT4G37450	611.352	357.47	566.927	616.166	498.368	506.941	565.657	327.065	543.859	706.927	621.361	1732.54	530.657	718.587	985.899	856.779	494.185	1779.45	5.67845e-09	2.16059e-07
AT3G14225	0	1.88638	0	0	0	1.065	0	0	0	27.3442	22.1519	1.80567	27.2132	7.60856	0	16.1439	5.35992	0	5.6901e-09	2.16096e-07
AT1G01610	1111.25	937.533	1180.24	1425.11	1052.51	1247.12	1630.71	972.11	1351.05	1878.7	1505.22	2069.29	1664.81	1645.14	1905.02	2315.49	1637.99	2206.95	5.70158e-09	2.16126e-07
AT1G64370	6844.06	12072.9	11309.7	6807.56	9955.5	10571.2	6505.54	10901.3	9441.44	11409.7	12853.6	8432.46	10212.9	11379	8473.43	7396.2	10955.7	6564.42	5.86204e-09	2.21793e-07
AT1G56300	1066	946.965	1079.22	1458.44	1154.55	1065	1149.56	1386.72	1270.33	641.783	708.861	582.327	687.533	1029.69	643.191	747.231	762.181	774.71	5.90489e-09	2.22998e-07
AT5G46790	321.126	209.389	276.248	280.157	323.939	384.466	293.873	181.703	362.573	542.862	448.576	710.53	398.593	469.195	464.473	515.451	452.378	766.03	5.95713e-09	2.24552e-07
AT5G13710	1269.05	990.352	1274.04	1147.65	986.058	1337.64	1056.41	892.821	1292.82	1906.05	1450.95	2529.74	1295.03	1599.49	2096.51	2270.52	1666.94	2490.14	6.07227e-09	2.28466e-07
AT2G28790	548.452	830.953	628.773	248.628	569.564	584.686	255.458	581.449	411.533	195.43	385.443	205.846	234.514	397.336	266.114	305.581	211.181	158.414	6.16257e-09	2.31434e-07
AT5G62570	418.236	544.222	452.511	447.711	430.733	407.896	592.547	482.338	502.838	746.335	736.551	637.4	645.913	656.027	681.488	624.999	592.808	668.377	6.20953e-09	2.32765e-07
AT1G19510	6.62115	9.43192	14.4309	12.6116	4.74637	8.52002	7.68295	14.8666	5.29303	57.101	42.0886	44.2388	64.031	45.6514	15.7115	35.7472	53.5992	29.2958	6.22422e-09	2.32885e-07
AT5G27350	1274.57	1067.69	890.59	1365.66	859.092	642.196	1228.31	697.078	747.641	963.479	1367.88	1458.08	1066.12	995.031	1645.78	1089.71	1174.9	1545.08	6.51855e-09	2.43448e-07
AT5G25140	155.597	143.365	136.062	242.323	144.764	132.06	174.787	142.884	103.214	207.494	200.475	276.267	192.093	111.592	246.475	179.889	174.734	300.553	6.62874e-09	2.47107e-07
AT4G14550	591.489	464.994	313.356	793.629	428.36	308.851	661.694	455.083	276.561	187.388	263.608	288.907	341.765	244.319	331.906	310.193	212.253	254.982	6.73382e-09	2.50562e-07
AT3G04720	700.738	1336.5	593.727	363.034	721.448	987.257	4846.98	944.854	1770.52	9157.88	6142.72	3299.86	8855.49	4744.36	4019.21	8548.18	8374.35	4307.56	6.79307e-09	2.52303e-07
AT1G69520	29.7952	31.1254	52.5696	27.9257	21.3586	63.9001	36.494	28.9072	56.9001	147.176	91.9304	55.9757	100.849	116.665	65.7921	102.629	112.558	85.7172	6.82136e-09	2.5289e-07
AT1G57765	308.987	264.094	237.078	298.174	265.797	218.325	296.754	206.48	239.51	321.696	273.576	410.789	236.114	276.444	343.69	329.796	315.164	440.521	6.88158e-09	2.54393e-07
AT1G61740	1434.58	765.872	1076.13	1302.6	1038.27	1105.47	1080.41	965.502	1044.05	1265.07	1138.61	3700.71	986.878	1154.81	1507.33	1594.78	1394.65	2771.16	6.88704e-09	2.54393e-07
AT1G69760	194.22	166.002	183.478	204.488	166.123	193.83	201.677	198.221	226.277	394.077	309.019	315.089	278.535	284.053	299.501	242.158	254.06	359.144	6.90664e-09	2.54652e-07
AT1G45191	721.705	956.397	949.345	494.555	759.419	706.097	767.335	850.699	676.185	345.019	727.69	327.728	505.045	474.267	297.537	313.652	343.035	364.569	6.97583e-09	2.56736e-07
AT5G60920	3947.31	2567.37	3646.89	4298.75	3367.55	3755.2	4097.89	2927.07	3429.88	3257.98	3537.66	5824.18	3183.94	3602.23	4970.74	4037.12	3325.3	6113.05	7.08082e-09	2.60127e-07
AT4G21215	627.905	483.858	855.544	914.34	706.022	662.432	663.615	834.181	723.822	279.875	279.114	535.38	312.151	318.714	473.31	300.968	377.339	579.405	7.24232e-09	2.65578e-07
AT5G12250	6868.33	4101.94	5208.51	6082.39	5122.52	4903.27	5506.75	4591.3	4685.66	4685.5	4934.34	6891.33	4721.49	5370.8	6724.54	5401.28	5179.83	6657.73	7.59568e-09	2.78032e-07
AT5G44730	316.711	347.095	422.618	342.315	370.217	381.271	258.339	374.968	432.705	209.102	251.424	228.417	239.316	306.879	190.502	287.13	247.628	230.026	7.66499e-09	2.80063e-07
AT4G06746	26.4846	7.54554	2.06155	10.8099	26.105	12.78	29.7714	19.8221	15.8791	211.515	95.2532	23.4737	89.6434	84.5396	98.1971	219.095	129.71	70.5268	7.71663e-09	2.81442e-07
AT1G72510	1092.49	1064.86	934.914	1319.71	1045.39	1115.06	1172.61	1018.36	1057.28	1509.56	1016.77	2350.07	1247	1235.97	2141.68	1294.97	1217.77	2403.34	7.92867e-09	2.88655e-07
AT3G48560	6951.1	6078.88	7296.86	6535.51	6648.47	6770.22	5413.6	5993.71	6348.99	8423.61	8072.15	11833.4	7225.9	8506.37	10375.5	8894.12	8763.48	11451.4	7.96735e-09	2.89542e-07
AT5G56870	92.696	43.3869	23.7078	123.413	78.315	47.9251	109.482	36.3405	27.7884	451.983	109.652	161.607	140.868	169.925	120.782	902.904	546.712	214.836	8.06108e-09	2.92424e-07
AT1G55310	816.608	1062.03	875.129	892.72	772.471	843.482	1026.63	934.117	801.894	1349.51	1444.3	1241.4	1274.22	1285.85	1123.38	1201.57	1333.55	1385.58	8.48154e-09	3.07126e-07
AT5G40370	2180.56	2233.48	2365.63	1771.03	2190.45	2402.65	2447.02	2406.74	2396.42	1740.37	2283.86	1557.39	1826.48	2118.56	1502.42	1567.11	1711.96	1548.33	8.54416e-09	3.08841e-07
AT1G34210	610.249	873.396	711.235	645.894	800.949	645.391	711.633	780.496	703.973	1050.34	1090.98	850.469	1046.91	990.804	855.297	848.707	866.164	841.982	8.96938e-09	3.23537e-07
AT2G29120	221.808	194.298	240.171	187.372	327.499	350.386	266.982	313.85	381.098	576.64	430.854	345.785	512.248	393.109	405.554	494.695	468.457	479.582	8.99867e-09	3.23537e-07
AT4G17680	186.496	235.798	179.355	116.207	174.429	190.635	140.214	138.755	144.235	294.352	385.443	349.396	340.965	300.961	371.185	235.239	210.109	346.124	8.98803e-09	3.23537e-07
AT3G10340	269.26	127.331	131.939	173.86	130.525	108.63	232.409	154.447	92.628	81.2282	131.804	272.656	76.8372	100.602	162.025	83.0257	85.7588	199.645	9.02748e-09	3.23997e-07
AT3G28220	1713.77	7662.5	4623.03	2365.57	3455.35	1617.74	3514.95	3985.07	1336.49	564.576	1529.59	250.988	1054.91	633.202	290.664	251.383	498.473	233.281	9.097e-09	3.25914e-07
AT5G65280	193.117	231.082	153.586	149.537	181.549	151.23	154.619	234.562	156.144	54.6883	114.082	61.3927	109.653	92.9936	60.8822	50.7379	62.1751	82.4621	9.18256e-09	3.28398e-07
AT1G22710	5083.94	7069.23	7282.43	5465.32	7087.51	6951.27	4777.83	7628.21	6833.3	6324.54	6307.75	4968.29	6051.73	6118.98	4738.99	4611.38	6765.3	4030.88	9.2695e-09	3.30923e-07
AT3G62950	19.8634	0	0	30.6281	4.74637	8.52002	5.76221	6.60737	0	62.7307	22.1519	168.83	49.624	47.3422	33.387	71.4943	79.3269	95.4825	1.02182e-08	3.64151e-07
AT4G22690	2236.84	1915.62	2164.63	2521.42	2354.2	2886.16	4404.25	2003.69	3425.91	9007.49	5895.73	3300.76	5845.23	5779.97	4753.72	7863.22	7000.06	4430.17	1.05068e-08	3.7312e-07
AT5G08570	2520.45	2153.31	2651.16	2283.6	2612.87	2633.75	2335.62	2658.64	2598.88	1520.01	2003.64	1863.45	1879.31	2001.05	1748.89	1917.66	1792.36	1858.65	1.05048e-08	3.7312e-07
AT5G10410	145.665	175.434	162.863	192.777	147.137	125.67	195.915	231.258	137.619	35.3866	57.5949	99.3117	56.0271	43.9606	106.053	29.9815	53.5992	121.523	1.05309e-08	3.73321e-07
AT3G14920	377.405	460.278	453.541	448.612	328.686	363.166	427.364	359.276	393.007	558.947	574.842	569.688	601.091	508.083	607.84	627.305	535.992	717.203	1.06286e-08	3.76124e-07
AT1G67810	80.5573	114.126	61.8466	76.5704	109.166	120.345	329.406	123.888	227.6	487.369	481.804	142.648	368.979	315.333	259.24	439.344	444.874	271.257	1.10077e-08	3.88861e-07
AT1G74940	487.758	443.3	571.05	663.91	539.899	627.286	690.505	468.297	694.71	1152.48	831.804	847.76	807.591	941.771	1567.23	962.867	1062.34	1038.37	1.11299e-08	3.92493e-07
AT3G06500	1355.13	1909.02	1380.21	1469.25	1663.6	1299.3	2067.67	2125.1	1474.11	1071.25	1068.83	502.878	1003.69	777.764	513.571	980.164	1205.98	480.667	1.11657e-08	3.93073e-07
AT1G36180	440.306	545.165	443.234	563.017	563.631	551.671	379.346	463.342	497.545	335.368	404.272	288.004	368.979	326.323	318.159	292.896	361.259	337.444	1.14985e-08	4.04084e-07
AT3G29590	216.291	1121.46	501.988	84.6778	219.519	347.191	248.735	552.541	381.098	14.4763	194.937	12.6397	176.886	60.8685	1.96394	16.1439	7.50389	1.08503	1.17396e-08	4.1163e-07
AT3G52480	24.2775	38.6709	37.1079	24.3224	42.7173	22.3651	24.9696	26.4295	50.2838	115.811	90.8228	92.089	60.8295	99.7567	199.34	126.845	96.4786	99.8226	1.17539e-08	4.1163e-07
AT1G35350	308.987	299.935	351.495	286.463	333.432	502.681	439.849	187.484	480.342	1172.58	851.741	625.663	702.74	611.221	633.372	806.041	801.845	657.527	1.19947e-08	4.19337e-07
AT1G73530	691.91	625.337	772.051	715.257	834.174	880.757	567.578	801.97	760.873	626.503	654.589	401.761	661.12	656.873	447.779	597.323	557.432	371.08	1.21215e-08	4.23039e-07
AT3G14595	1056.07	755.497	633.927	1268.37	691.783	624.091	1146.68	938.247	734.408	530.798	564.873	637.4	566.674	596.004	833.694	614.62	654.983	674.887	1.24027e-08	4.32108e-07
AT5G43890	5.51762	1.88638	0	2.70248	7.11955	0	0	0	0	12.0636	19.9367	25.2793	16.8081	7.60856	16.6935	19.6033	18.2237	18.4455	1.28003e-08	4.45196e-07
AT4G00050	271.467	342.379	304.079	423.389	329.872	353.581	418.721	338.628	299.056	429.464	511.709	873.943	452.219	545.28	569.543	401.291	483.465	721.544	1.29352e-08	4.49115e-07
AT1G65800	1845.09	1888.27	2202.77	2271.89	3204.98	3228.02	2681.35	2965.06	2989.24	2172.25	1848.58	957.906	1986.56	2091.51	1314.86	2361.62	2231.87	1079.6	1.31912e-08	4.56438e-07
AT5G03120	472.308	145.252	381.387	602.654	230.199	381.271	386.068	147.014	346.693	349.04	224.842	1476.13	204.099	393.109	783.613	804.888	360.187	1282.5	1.31891e-08	4.56438e-07
AT1G07350	599.214	717.769	612.281	580.133	664.491	611.311	670.337	754.066	590.173	1012.54	1190.66	1542.04	995.682	1179.33	1130.25	921.354	782.549	1682.88	1.33216e-08	4.60165e-07
AT5G22630	656.597	496.119	480.342	596.348	493.622	620.896	654.011	631.83	580.91	366.733	465.19	384.607	352.171	419.316	458.581	366.697	362.331	465.477	1.34093e-08	4.62403e-07
AT4G21750	2453.13	2166.51	2541.89	2921.38	2300.8	2433.53	2699.6	2141.61	2454.64	2740.85	2787.82	4002.26	2656.49	2742.46	3682.39	3270.29	2682.11	3608.8	1.34893e-08	4.64372e-07
AT5G25040	900.476	832.839	877.19	1037.75	913.675	824.312	1101.54	1103.43	1091.69	783.33	678.956	645.526	734.756	729.577	785.577	759.915	703.222	798.58	1.3779e-08	4.73539e-07
AT5G25280	1830.75	1328.01	1476.07	2370.08	1493.92	1411.13	1838.15	1174.46	1205.49	4241.56	3032.6	2254.37	2762.94	3066.25	4408.07	3229.93	3494.67	2344.75	1.38962e-08	4.76758e-07
AT3G50480	350.921	209.389	396.849	260.339	427.173	871.172	787.502	363.405	804.541	3206.5	1700.16	934.432	1420.69	1481.98	1067.4	2369.69	1827.73	1557.01	1.39451e-08	4.77626e-07
AT1G12800	5707.43	4989.49	5582.68	5677.02	6127.56	5494.35	4261.16	5556.8	5154.09	4018.79	4144.62	3552.65	3947.51	4557.53	3140.34	4577.94	4638.48	3573	1.4064e-08	4.80883e-07
AT4G12690	100.421	50.9324	79.3697	129.719	70.0089	48.9901	77.7899	55.3367	66.1629	123.049	108.544	167.927	130.463	110.747	167.917	190.267	172.59	152.989	1.42715e-08	4.87157e-07
AT1G65960	11275.8	7515.36	9763.51	10934.2	9932.96	9786.31	10563.1	9356.86	9866.21	10605.5	10857.8	13736.6	10096.1	10780.5	14155.1	11115.1	10487.2	15285.9	1.45108e-08	4.94491e-07
AT3G52180	3429.75	4814.05	5387.87	4405.95	4624.15	5079	5739.16	6382.72	5907.02	2732.81	3491.14	2663.36	4136.4	3145.72	3351.47	2095.24	2920.09	3504.64	1.47003e-08	5.00106e-07
AT3G60390	336.575	362.186	380.356	356.728	364.284	349.321	326.525	354.32	362.573	574.227	498.418	334.951	600.291	583.323	589.183	507.379	559.576	416.651	1.49767e-08	5.08654e-07
AT1G75900	817.711	581.007	795.759	1024.24	824.681	1012.82	1001.66	967.154	1021.55	374.776	448.576	731.295	536.26	498.784	708.001	529.289	520.985	974.355	1.52157e-08	5.15906e-07
AT5G63320	1019.66	1316.7	1273.01	1022.44	1167.61	1148.07	1186.06	1245.49	1161.82	1961.54	1494.15	1219.73	1629.59	1350.94	1234.34	1637.45	1579.03	1267.31	1.57128e-08	5.31869e-07
AT1G12080	496.586	69.7962	171.109	325.199	125.779	148.035	419.681	116.455	152.175	176.129	137.342	573.299	100.849	199.513	402.608	586.945	173.662	667.292	1.58355e-08	5.34236e-07
AT1G76490	5603.7	4659.37	4860.11	6537.31	4549.39	4632.76	5339.65	4317.09	4664.48	5050.63	5206.8	6811.88	4559.01	5368.26	6301.31	6667.42	5864.83	6690.28	1.58237e-08	5.34236e-07
AT3G55960	587.075	600.814	559.711	617.067	562.444	652.846	721.237	517.853	640.457	1266.68	1021.2	732.198	1040.5	927.399	936.801	1060.88	1083.78	850.662	1.61723e-08	5.44691e-07
AT3G28040	1510.72	1579.85	1766.75	1753.91	1514.09	1700.81	1443.43	1225.67	1576	2303.34	1762.18	2972.13	1748.85	1935.96	2396.01	2386.99	2281.18	2758.14	1.63254e-08	5.48936e-07
ATCG00190	632.319	588.552	767.928	658.505	709.582	658.171	413.919	669.822	613.992	338.585	297.943	475.793	397.793	339.849	301.465	363.237	393.418	372.165	1.6832e-08	5.65031e-07
AT1G79560	1624.39	1791.12	1775	1403.49	1873.63	1713.59	1251.36	1790.6	1639.52	1629.39	1629.27	1115	1693.62	1810.84	1302.09	1437.96	1662.65	1104.56	1.7008e-08	5.69993e-07
AT5G49555	894.958	1016.76	1036.96	955.778	1016.91	1091.63	997.823	1101.78	1177.7	900.749	915.981	483.919	857.215	930.781	630.426	780.672	824.356	458.967	1.72124e-08	5.75891e-07
AT3G11020	55.1762	50.9324	49.4772	70.2646	73.5687	39.4051	48.9788	52.859	66.1629	23.323	19.9367	3.61133	33.6163	13.5263	11.7837	13.8376	12.8638	6.51017	1.89206e-08	6.31998e-07
AT2G39920	354.231	167.888	473.126	447.711	418.867	273.706	425.443	439.39	342.724	110.181	47.6266	135.425	135.265	130.191	113.909	222.555	232.621	141.054	1.90765e-08	6.36157e-07
AT5G22300	175.46	307.481	249.448	216.199	202.907	337.606	737.563	417.916	562.384	955.437	771.994	319.603	1025.3	589.241	574.453	785.284	891.891	569.64	1.98484e-08	6.60807e-07
AT4G23600	6456.72	9386.65	14483.4	13212.4	11263.1	12476.5	20026.6	16567.2	12911	5453.55	9324.84	3885.79	7466.82	5768.98	4603.48	3639.29	5736.19	6575.27	1.9889e-08	6.61071e-07
AT1G26420	11.0352	5.65915	2.06155	3.60331	11.8659	0	32.6525	13.2147	5.29303	283.092	254.747	74.9352	236.114	99.7567	33.387	199.492	160.798	32.5508	2.02414e-08	6.71684e-07
AT3G23000	2604.32	2585.29	1825.5	2438.54	2436.07	1692.29	2741.85	2557.05	1914.75	3117.23	4170.1	4047.4	3294.4	3011.3	4146.87	2752.53	2454.85	5177.75	2.16444e-08	7.17062e-07
AT4G24760	311.194	232.025	239.14	310.786	270.543	253.471	266.982	214.74	211.721	328.934	410.918	425.234	353.771	249.392	424.212	337.868	273.356	442.691	2.16946e-08	7.17552e-07
AT1G19940	140.148	45.2732	87.616	149.537	92.5541	89.4602	148.857	67.7256	116.447	40.212	43.1962	142.648	33.6163	37.1974	90.3414	89.9445	55.7432	133.458	2.19742e-08	7.25613e-07
AT1G62570	429.271	625.337	323.664	494.555	360.724	354.646	633.843	1162.07	431.382	131.895	251.424	265.433	308.95	175.842	220.944	119.926	198.317	227.856	2.21068e-08	7.28805e-07
AT3G30775	337.678	120.729	140.186	76.5704	168.496	137.385	84.5124	116.455	127.033	1096.98	278.006	984.088	215.304	473.422	1512.24	1160.05	779.333	992.8	2.22748e-08	7.33148e-07
AT5G44130	721.705	294.276	567.958	584.637	433.106	635.806	875.856	360.928	681.478	587.095	444.146	2653.43	426.607	726.195	1513.22	1449.49	778.261	2121.23	2.28044e-08	7.49361e-07
AT4G22880	1074.83	3436.05	2539.83	192.777	773.658	1278	909.469	1644.41	1114.18	56.2968	829.589	9.02833	734.756	257	27.4952	18.4501	23.5837	8.68022	2.33483e-08	7.65991e-07
AT2G38995	282.502	415.948	376.233	181.066	391.575	406.831	387.029	403.05	346.693	257.357	347.785	117.368	313.752	300.116	174.791	187.961	248.7	82.4621	2.34709e-08	7.67525e-07
AT3G02350	1337.47	1018.65	1274.04	1460.24	1092.85	1214.1	1610.54	1040.66	1302.09	1145.24	1352.37	2099.99	1223.79	1181.86	1699.79	1319.19	1127.73	2095.19	2.34422e-08	7.67525e-07
AT3G55940	156.7	162.229	183.478	218.901	145.951	152.295	251.617	203.177	125.709	55.4925	88.6076	87.5748	99.2481	60.0231	87.3955	73.8006	99.6946	61.8466	2.38724e-08	7.78141e-07
AT5G37360	4046.62	3012.56	4650.86	4878.88	4707.21	4461.3	3901.98	4526.88	4022.7	2851.03	2775.63	2332.92	3293.59	3034.13	2278.17	2940.49	3200.95	2658.32	2.38723e-08	7.78141e-07
AT4G21120	15.4493	11.3183	4.1231	10.8099	4.74637	8.52002	18.247	9.91106	1.32326	96.5088	24.3671	34.3077	67.2326	64.2501	43.2067	48.4316	98.6226	60.7616	2.39509e-08	7.79445e-07
AT1G73540	227.326	151.854	181.417	133.323	123.406	130.995	173.827	187.484	112.477	204.277	215.981	262.724	241.717	240.092	635.336	205.258	181.165	258.237	2.41192e-08	7.83661e-07
AT5G23575	1495.28	1461.01	1684.29	1784.54	1625.63	1530.41	1767.08	1457.75	1802.28	1174.19	1143.04	1408.42	1052.51	1203	1316.82	1211.94	1179.18	1515.78	2.46289e-08	7.9894e-07
AT4G19840	2268.85	4195.32	4108.67	2080.01	3130.23	3718.99	1938.02	3674.52	3313.44	3446.17	3720.41	2288.68	3333.61	3380.74	2804.51	2006.45	2703.55	1980.18	2.50033e-08	8.09788e-07
AT2G41150	23.174	25.4662	35.0464	21.6199	23.7318	41.5351	27.8507	17.3443	43.6675	74.7943	80.8544	111.048	55.2267	65.0955	62.8462	57.6567	56.8152	121.523	2.53022e-08	8.18158e-07
AT3G43720	1691.7	1054.49	1077.16	1745.8	1390.69	1393.02	1708.5	1165.38	1188.29	1232.1	1157.44	2433.14	1192.58	1372.92	1783.26	2223.24	1494.35	2230.82	2.60682e-08	8.41583e-07
AT1G23020	789.02	2875.79	2202.77	609.86	795.016	1183.22	590.627	358.45	849.531	3442.15	4826.9	1225.14	2971.84	1828.59	1402.26	1635.14	1730.18	1167.49	2.61476e-08	8.42802e-07
AT2G37690	216.291	243.344	179.355	141.43	176.802	174.66	162.302	189.962	173.347	298.373	303.481	520.032	272.132	272.218	397.698	272.14	258.348	500.198	2.65667e-08	8.54949e-07
AT5G13580	64.0044	16.9775	14.4309	58.5538	11.8659	6.39001	22.0885	39.6442	10.5861	3.21696	8.86076	54.17	0	0	3.92789	6.9188	0	10.8503	2.69561e-08	8.66102e-07
AT5G52040	1457.76	1531.74	1417.32	1507.09	1406.11	1412.19	1381.97	1448.67	1198.87	1680.06	1726.74	2172.22	1586.37	1702.63	2052.32	1699.72	1753.77	2208.03	2.70641e-08	8.67602e-07
AT5G54710	203.048	192.411	225.74	187.372	242.065	419.611	315.001	166.01	486.959	809.869	559.336	422.526	551.467	547.817	491.968	673.43	592.808	492.603	2.70885e-08	8.67602e-07
AT5G07920	616.87	564.029	438.08	602.654	632.453	538.891	713.554	633.482	561.061	373.972	406.487	414.4	489.037	360.984	564.634	320.571	393.418	453.542	2.72562e-08	8.71596e-07
AT5G10740	119.181	132.99	80.4005	135.124	177.989	175.725	178.629	130.496	156.144	366.733	250.316	191.401	296.944	313.642	214.07	246.771	248.7	249.556	2.74657e-08	8.76908e-07
AT1G76450	1439	1434.6	1713.15	1760.22	1884.31	1700.81	1406.94	1300	1541.6	1268.29	1270.41	1291.95	1250.21	1229.21	1152.83	1402.21	1371.07	1350.86	2.80541e-08	8.94284e-07
AT3G11700	2113.25	1159.18	1842	2324.14	1587.66	2112.96	2065.75	1191.8	2093.39	2278.41	1721.2	3687.17	1628.79	2275.81	3127.58	2692.57	2240.45	3800.85	2.82395e-08	8.9878e-07
AT4G35320	615.767	340.492	505.08	749.489	440.225	437.716	593.508	401.398	428.735	226.796	291.298	861.303	305.748	313.642	501.787	383.994	291.58	844.152	2.84381e-08	9.0368e-07
AT1G64970	1077.04	1131.83	895.744	1283.68	1159.3	1021.34	1470.32	1520.52	1045.37	891.098	950.317	1071.66	1064.52	872.449	1330.57	721.862	772.901	978.695	2.85391e-08	9.05469e-07
AT4G24972	271.467	257.492	237.078	320.695	266.983	249.211	300.595	366.709	247.449	320.892	302.373	623.858	388.988	344.922	755.136	350.553	283.004	634.741	2.89526e-08	9.17149e-07
AT4G33050	399.476	675.326	512.296	392.761	793.83	1218.36	1271.53	764.803	1427.79	2497.16	1814.24	771.922	1791.27	1347.56	1075.26	1598.24	1642.28	1061.16	2.9423e-08	9.30593e-07
AT3G18217	77.2467	71.6826	62.8773	60.3555	53.3966	66.0301	62.424	43.7738	63.5164	130.287	139.557	132.716	90.4438	76.931	120.782	126.845	93.2627	119.353	3.03929e-08	9.59771e-07
AT5G56630	1164.22	1148.81	1149.32	1112.52	1014.54	1141.68	1135.16	1358.64	1152.56	780.917	918.196	845.052	938.054	859.768	822.892	726.474	728.95	917.934	3.2453e-08	1.02323e-06
AT5G62720	1911.3	1079.96	1520.39	2231.35	2012.46	1579.4	1387.73	1675.79	1570.71	776.896	675.633	1009.37	744.36	1141.28	807.181	1231.55	885.459	940.719	3.32706e-08	1.04738e-06
AT4G37120	1201.74	1369.52	1532.76	1435.92	1413.23	1405.8	1328.19	1167.85	1431.76	2015.42	1840.82	1653.09	1675.21	1677.27	1620.25	1842.71	1895.27	1652.5	3.36016e-08	1.05615e-06
AT1G18370	353.128	352.754	427.772	238.719	352.418	355.711	135.412	280.813	304.349	221.97	284.652	193.206	246.519	282.362	117.837	156.826	259.42	81.3771	3.50902e-08	1.10123e-06
AT1G26920	1112.35	897.919	827.713	1420.61	1160.49	900.992	1038.16	978.717	799.248	977.956	806.329	1321.75	984.477	1088.87	1319.77	1044.74	999.09	1341.09	3.52523e-08	1.10461e-06
AT3G25530	2638.53	2290.07	2989.25	2870.04	2894.1	2961.77	2559.38	2885.77	3141.41	2264.74	2322.63	1975.4	2534.03	2499.84	2010.1	2103.32	2399.1	1834.78	3.58742e-08	1.12236e-06
AT5G45510	3686.87	3046.51	3610.81	3693.39	4649.07	5196.15	3663.81	3601.02	4694.92	3367.35	2815.51	1963.66	2697.31	2984.25	2121.06	3425.96	3363.89	2144.02	3.60053e-08	1.12472e-06
AT4G17340	3713.36	842.271	1551.32	2770.95	1552.06	1486.74	2179.08	1360.29	1230.63	1612.5	1565.03	3277.28	1428.69	1733.06	2411.72	3061.57	1947.8	3316.93	3.62419e-08	1.13037e-06
AT1G25560	629.009	388.595	355.618	798.134	319.193	527.176	889.301	442.694	516.07	1773.35	1172.94	577.813	1269.41	1491.28	2819.24	922.507	1037.68	1133.85	3.69736e-08	1.15142e-06
AT3G56580	531.899	628.166	626.712	619.77	645.506	641.131	593.508	624.397	590.173	484.957	518.354	403.566	506.645	500.474	444.833	492.388	532.776	468.732	3.72024e-08	1.15676e-06
AT1G31173	687.496	378.22	562.804	862.092	402.255	408.961	467.7	460.864	394.331	238.859	143.987	276.267	195.295	219.803	229.781	336.715	275.5	166.009	3.74037e-08	1.16123e-06
AT4G16515	211.877	86.7737	123.693	167.554	138.831	82.0052	131.571	61.1182	80.7187	83.6409	112.975	197.72	88.843	100.602	184.611	126.845	99.6946	189.88	3.77541e-08	1.16908e-06
AT5G16570	77.2467	116.956	45.3541	84.6778	97.3005	89.4602	187.272	35.5146	50.2838	579.857	176.108	251.89	210.502	360.139	318.159	454.335	460.953	308.148	3.77718e-08	1.16908e-06
AT2G46250	340.989	369.731	275.217	322.496	236.132	225.781	255.458	236.214	236.863	560.555	429.747	396.344	428.207	426.925	437.959	652.674	470.601	354.804	3.91865e-08	1.21101e-06
AT5G65990	939.099	830.009	987.483	1162.97	1003.86	872.237	1024.71	1072.87	838.945	583.074	671.203	724.975	801.988	761.702	763.974	601.936	671.062	695.503	3.97278e-08	1.22587e-06
AT5G12130	928.064	803.6	951.406	1072.89	1006.23	1011.75	858.57	932.465	913.048	731.858	779.747	635.595	761.969	668.708	644.173	740.312	775.045	639.081	4.01154e-08	1.23595e-06
AT1G55260	1459.96	1195.97	1354.44	1664.73	1325.42	1285.46	2017.73	1308.26	1316.64	1427.53	1468.67	2115.34	1688.02	1556.37	2067.05	1713.56	1233.85	2000.79	4.03856e-08	1.24064e-06
AT1G79450	70.6256	20.7502	45.3541	57.653	40.3441	56.4451	48.9788	34.6887	50.2838	8.0424	6.64557	25.2793	6.4031	20.2895	8.83774	16.1439	27.8716	15.1904	4.03902e-08	1.24064e-06
AT1G21250	2415.61	3176.67	4841.55	2212.43	5766.83	8724.5	5936.04	5254.51	8573.39	5201.82	5034.02	923.598	4156.41	4319.97	1991.44	4039.43	4210.76	1922.67	4.13644e-08	1.26863e-06
AT2G36350	450.238	588.552	457.665	388.257	469.89	454.756	300.595	407.179	497.545	250.119	352.215	259.113	265.729	296.734	326.996	167.204	222.973	241.961	4.16171e-08	1.27445e-06
AT5G16720	180.978	149.968	123.693	127.918	112.726	112.89	138.293	90.8514	111.154	240.468	279.114	216.68	196.895	185.142	196.394	254.843	233.693	184.455	4.2046e-08	1.28564e-06
AT1G67510	452.445	377.277	345.31	517.976	435.479	454.756	441.77	427.827	441.968	217.145	320.095	210.36	291.341	294.198	227.817	307.887	289.436	249.556	4.22929e-08	1.2893e-06
AT5G66040	4998.96	3776.54	3785.01	4071.74	3657.08	3510.25	5114.92	3642.31	3416.65	4705.61	5822.63	5779.04	3806.64	5752.92	6146.16	5191.41	5082.28	5926.42	4.22545e-08	1.2893e-06
AT3G53990	2578.94	1477.98	1664.7	3043	2325.72	1809.44	2521.93	2549.62	2256.15	1269.09	1032.28	1862.54	1255.01	1520.02	1908.95	1885.37	1773.06	1904.22	4.28316e-08	1.30376e-06
AT2G41080	206.359	180.15	225.74	240.521	249.184	290.746	177.668	248.602	295.086	176.129	182.753	133.619	180.087	163.161	108.017	144.142	196.173	136.714	4.42157e-08	1.34387e-06
AT1G03290	848.61	1117.68	1056.55	1133.24	1244.73	1352.55	1362.76	1343.77	1422.5	1028.62	925.949	501.975	1091.73	779.455	691.308	845.247	968.002	581.575	4.55736e-08	1.38099e-06
AT1G04420	2332.85	1842.05	2565.6	2529.52	2748.15	2371.76	1839.11	2559.53	2301.14	1618.13	1489.72	1448.14	1823.28	1732.22	1241.21	1831.18	1823.45	1392.09	4.55249e-08	1.38099e-06
AT2G32870	1770.05	2354.21	2353.26	1990.83	2199.94	2215.21	927.716	1279.35	1307.38	2323.45	2535.29	1771.36	1832.89	2262.28	1636.95	1266.14	1501.85	954.825	4.64237e-08	1.40465e-06
AT1G03870	686.392	216.934	433.957	638.687	281.222	487.771	259.3	185.832	522.687	1171.78	474.051	3229.43	473.029	1042.37	2030.72	2020.29	1109.5	2508.58	4.87291e-08	1.4722e-06
AT1G61890	827.643	647.973	794.728	1073.79	665.678	858.392	1246.56	641.741	951.422	498.629	707.753	1040.06	612.296	578.251	710.947	638.836	630.327	1039.46	4.93844e-08	1.48881e-06
ATCG00180	237.258	232.969	319.541	236.017	307.327	261.991	122.927	220.521	219.661	119.832	74.2089	144.453	67.2326	108.211	120.782	109.548	83.6148	120.438	4.94261e-08	1.48881e-06
AT1G52342	108.145	94.3192	114.416	118.909	99.6737	66.0301	90.2747	80.9403	71.4559	158.435	143.987	250.988	168.882	131.882	342.708	170.664	135.07	133.458	4.95808e-08	1.49126e-06
AT2G03710	164.425	158.456	190.694	217.1	202.907	197.025	139.253	182.529	105.861	91.6833	118.513	97.506	97.6473	84.5396	114.891	104.935	78.2549	81.3771	5.00706e-08	1.50375e-06
AT1G65390	0	1.88638	10.3078	1.80166	2.37318	17.04	1.92074	1.65184	5.29303	91.6833	38.7658	25.2793	29.6143	11.8355	38.2969	58.8098	65.3911	36.8909	5.01539e-08	1.50402e-06
AT4G32980	1046.14	1395.92	1633.78	1012.53	1262.53	1088.43	926.756	1209.97	1012.29	925.68	1095.41	723.169	1167.77	965.442	933.855	757.609	884.387	665.122	5.05159e-08	1.51264e-06
AT1G69830	6073.8	5026.27	6523.78	7017.45	6750.52	5835.15	6008.07	6469.44	6290.77	4525.46	4314.08	4507.85	4674.26	5157.76	4635.89	4882.37	4883.96	4646.09	5.08561e-08	1.51816e-06
AT2G37660	7577.9	6486.33	7389.63	6738.19	8086.62	7504.01	5089.95	6906.35	7412.89	5384.39	4778.17	4227.97	5669.14	6115.59	3660.79	5734.54	5760.85	3589.27	5.08986e-08	1.51816e-06
AT2G46530	478.93	409.346	425.71	895.423	715.515	496.291	984.378	701.207	603.405	622.482	383.228	931.724	645.913	692.379	1080.17	774.906	790.053	1063.33	5.09253e-08	1.51816e-06
AT1G52870	3139.53	2800.34	3238.7	3941.12	3247.7	3327.07	4013.38	3862.83	3668.07	4313.14	4256.49	4376.94	4202.03	3718.05	5310.5	4519.13	4691.01	4680.81	5.10513e-08	1.51968e-06
AT5G03350	3019.24	2641.88	4624.06	1626.9	7078.02	6557.22	3940.39	3722.43	4686.98	1490.26	1565.03	217.583	910.041	1497.2	865.117	1478.32	1232.78	223.516	5.28079e-08	1.56966e-06
AT1G79520	579.35	813.975	751.436	861.191	690.596	530.371	582.944	1012.58	558.415	310.437	474.051	321.409	438.612	282.362	355.474	315.959	393.418	339.614	5.31424e-08	1.57511e-06
AT2G39010	8513.69	4881.96	5689.88	10093.8	7354.49	6159.97	7476.47	6988.95	6509.1	5242.03	5304.27	10043.1	5246.54	6578.87	8684.56	7460.78	6193.93	10166.7	5.31469e-08	1.57511e-06
AT3G26600	422.65	499.892	496.834	450.414	671.611	804.077	727.959	616.963	787.338	501.041	497.31	303.352	391.39	388.882	343.69	541.973	483.465	376.505	5.32966e-08	1.57724e-06
AT1G06160	19.8634	76.3986	28.8617	20.719	29.6648	48.9901	176.708	25.6036	103.214	732.662	373.26	113.757	437.012	291.662	326.996	367.85	358.043	246.301	5.3677e-08	1.58386e-06
AT3G15110	1003.1	952.624	1132.82	1108.92	1177.1	1209.84	969.012	1073.7	1038.76	846.864	826.266	839.635	889.231	896.12	820.928	923.66	926.195	746.499	5.3628e-08	1.58386e-06
AT4G14500	1402.58	1171.45	1217.35	1294.49	1226.94	1257.77	1371.41	1379.29	1196.22	1072.05	898.26	908.25	895.634	853.005	976.08	1053.96	1022.67	873.447	5.42294e-08	1.59783e-06
AT2G38760	93.7996	69.7962	57.7235	102.694	85.4346	78.8102	126.769	102.414	60.8698	102.943	128.481	196.818	106.452	78.6218	143.368	124.538	71.823	155.159	5.44087e-08	1.60079e-06
AT5G03190	995.379	1362.91	965.837	981.002	1158.11	849.872	1054.48	1542.82	938.19	447.962	614.715	740.323	824.399	656.873	704.074	472.785	452.378	766.03	5.49497e-08	1.61436e-06
AT3G43600	947.927	1010.16	966.868	848.58	884.011	865.847	1019.91	825.096	943.483	1287.59	1231.65	1228.76	1123.74	1071.12	1273.62	1097.78	1138.45	1227.17	5.7595e-08	1.68962e-06
AT4G19960	465.687	504.608	545.28	615.265	558.885	489.901	598.31	582.275	517.394	418.205	393.196	342.174	371.38	382.964	395.734	405.903	407.354	390.61	5.82796e-08	1.70723e-06
AT1G15125	119.181	760.213	182.447	233.314	500.742	651.781	1638.39	209.784	1008.32	13794.3	3717.09	954.295	5682.75	5172.13	4686.95	10494.7	12306.4	2035.51	5.87577e-08	1.71875e-06
AT1G68840	1156.49	616.848	630.835	1147.65	659.745	750.827	1328.19	673.126	764.843	3918.26	1905.06	1349.74	2156.24	3191.37	6521.27	2149.44	3360.67	2151.61	5.94471e-08	1.7364e-06
AT3G26500	11.0352	13.2047	4.1231	18.9174	9.49273	8.52002	40.3355	11.5629	10.5861	178.541	88.6076	36.1133	132.864	134.418	27.4952	140.682	207.965	36.8909	5.98999e-08	1.74711e-06
AT1G06400	551.762	627.223	499.926	654.001	684.663	582.556	784.621	663.215	611.345	911.204	708.861	804.424	785.981	837.787	880.828	804.888	796.485	888.638	6.02322e-08	1.75427e-06
AT5G21090	3510.31	3211.57	3290.24	3431.25	3342.63	3364.34	4209.3	3238.44	3489.43	4810.16	4617.56	4229.77	4362.11	4128.91	4347.19	4584.86	4289.01	4380.26	6.10211e-08	1.7747e-06
AT2G43530	1095.8	2559.82	2364.6	1389.98	2072.98	1812.63	2232.86	2534.75	1781.1	1320.56	1618.2	549.825	1412.68	1382.22	834.676	690.727	1486.84	696.588	6.1702e-08	1.78977e-06
AT5G48880	2186.08	2440.98	2811.96	2023.26	2415.9	2145.98	2423.01	2742.06	2305.11	1342.28	1858.54	1690.1	1992.96	1622.31	1468.05	1402.21	1319.61	1647.07	6.17164e-08	1.78977e-06
AT1G04240	855.231	642.314	560.742	972.894	669.238	549.541	743.325	607.878	616.638	501.041	578.165	1486.06	564.273	561.343	1005.54	883.301	492.041	1435.49	6.26203e-08	1.81339e-06
AT4G23280	2.20705	0	3.09233	0	8.30614	0	1.92074	0	5.29303	69.1646	34.3354	16.251	60.8295	16.9079	11.7837	41.5128	40.7354	6.51017	6.29057e-08	1.81905e-06
AT3G11580	55.1762	150.911	122.662	82.8762	74.7553	133.125	90.2747	123.062	133.649	54.6883	71.9937	43.336	77.6376	74.3948	62.8462	41.5128	55.7432	42.3161	6.3125e-08	1.82279e-06
AT1G62780	2007.31	1730.76	2008.98	1714.28	2076.54	2021.37	1411.74	1859.98	1975.62	1251.4	1240.51	1378.63	1492.72	1427.03	1068.38	1496.77	1394.65	1214.15	6.33923e-08	1.8279e-06
AT5G10610	327.747	388.595	347.371	341.414	372.59	440.911	387.029	422.046	434.028	291.939	320.095	223	304.948	327.168	224.871	354.012	361.259	258.237	6.51493e-08	1.87589e-06
AT1G45249	806.676	835.669	592.696	922.448	776.031	568.711	919.073	1102.61	760.873	500.237	572.627	702.404	565.074	545.28	709.965	498.154	478.105	709.608	6.6984e-08	1.92598e-06
AT2G30010	669.839	451.789	596.819	601.753	568.377	681.602	734.682	312.198	815.127	1943.85	1081.01	1237.78	1016.49	1267.25	1528.93	2157.51	1407.52	1171.83	6.74204e-08	1.93578e-06
AT5G41600	1058.28	812.089	745.251	1030.55	843.667	790.232	1084.26	1053.88	770.136	640.175	633.544	921.793	739.558	754.093	890.648	686.115	735.382	986.29	6.77885e-08	1.94359e-06
AT2G26250	4710.94	3735.99	4335.44	5719.36	4389.2	4700.92	5694.99	4156.86	4590.38	5096.47	5101.58	7812.22	5061.65	5051.24	5806.4	6946.48	4985.8	7132.97	6.92168e-08	1.98173e-06
AT5G61190	571.626	598.927	622.589	492.753	704.835	896.732	631.923	617.789	782.045	606.397	697.785	390.024	463.424	558.807	382.969	568.495	613.175	454.627	6.95043e-08	1.98716e-06
AT5G25390	81.6608	182.979	130.909	148.637	167.309	189.57	276.586	360.102	218.337	86.8579	138.449	35.2105	174.484	97.2205	126.674	46.1254	85.7588	44.4861	7.03093e-08	2.00734e-06
AT2G32100	472.308	310.31	343.248	672.918	329.872	336.541	372.623	213.914	288.47	658.672	429.747	654.554	473.029	553.734	979.026	663.052	462.025	546.854	7.08535e-08	2.02002e-06
AT5G20960	346.507	316.913	165.955	238.719	149.511	138.45	404.315	214.74	220.984	928.093	779.747	370.162	833.203	392.264	369.221	842.941	525.273	495.858	7.12556e-08	2.02863e-06
AT5G57940	936.892	1054.49	961.714	1022.44	939.781	1017.08	1033.36	929.162	907.755	1491.06	1222.78	1312.72	1123.74	1410.97	1471.98	1298.43	1272.45	1434.41	7.27429e-08	2.06806e-06
AT3G12600	403.89	374.447	316.448	334.207	348.858	324.826	332.288	335.324	321.552	527.581	399.842	463.153	572.277	449.751	464.473	485.469	479.177	399.29	7.30009e-08	2.07249e-06
AT1G56010	440.306	458.392	264.909	408.976	310.887	348.256	490.748	282.465	346.693	559.751	547.152	659.971	376.182	554.58	701.128	574.261	559.576	726.969	7.32442e-08	2.07648e-06
AT4G12520	8.82819	0	0	19.8182	0	0	3.84147	3.30369	2.64652	3.21696	0	70.421	4.00194	1.69079	60.8822	2.30627	3.21595	17.3604	7.39779e-08	2.09435e-06
AT4G26850	6029.66	7209.76	6437.2	6757.11	5962.62	5354.83	6868.56	7016.2	5619.87	7667.62	10917.6	25041.9	8664.2	6813.89	18007.4	6398.74	6002.04	20277	7.62856e-08	2.15578e-06
AT5G20480	98.2137	200.9	240.171	113.504	218.333	293.941	199.757	197.395	326.845	280.68	299.051	139.036	248.921	205.431	145.332	294.049	296.94	101.993	7.63606e-08	2.15578e-06
AT5G46050	8.82819	26.4094	9.27698	18.0166	11.8659	19.17	24.0092	20.648	27.7884	107.768	69.7785	37.919	96.8469	50.7238	24.5493	55.3504	36.4475	10.8503	7.73398e-08	2.18038e-06
AT1G04660	104.835	18.8638	12.3693	41.4381	30.8514	23.4301	35.5336	14.8666	35.728	72.3816	100.791	113.757	49.624	94.6844	130.602	137.223	95.4066	144.309	7.79087e-08	2.19336e-06
AT5G28910	87.1784	128.274	170.078	111.703	132.898	138.45	90.2747	231.258	100.568	55.4925	44.3038	58.6842	94.4457	65.9409	45.1707	81.8725	75.0389	54.2514	7.80961e-08	2.19559e-06
AT3G14980	594.8	751.724	775.143	708.051	684.663	725.267	524.361	656.608	644.426	640.175	532.753	422.526	610.696	566.415	460.545	441.65	537.064	392.78	7.84353e-08	2.20206e-06
AT2G27580	320.022	317.856	312.325	254.033	300.208	367.426	349.574	322.109	308.319	436.702	490.665	619.344	429.808	492.866	454.653	493.541	423.434	579.405	8.25363e-08	2.31399e-06
AT4G14020	380.716	1034.68	973.052	408.075	562.444	992.582	469.62	758.196	981.857	649.826	755.38	361.133	836.405	684.771	525.355	424.353	642.119	437.266	8.299e-08	2.32349e-06
AT4G04745	66.2115	5.65915	6.18466	52.248	7.11955	4.26001	5.76221	1.65184	5.29303	25.7357	6.64557	39.7247	14.407	8.45396	25.5313	27.6752	10.7198	56.4214	8.31858e-08	2.32576e-06
AT3G17330	513.139	404.63	531.88	516.174	462.771	439.846	491.709	480.686	476.373	764.832	480.696	891.999	618.7	639.119	918.143	764.528	673.206	831.131	8.37444e-08	2.33814e-06
AT5G57110	1050.56	961.113	956.56	939.563	955.206	1051.16	954.606	1110.04	965.978	424.639	503.956	826.995	476.231	530.909	811.108	462.407	458.809	879.958	8.46692e-08	2.36071e-06
AT2G38610	561.694	427.266	508.173	626.976	463.957	485.641	607.913	459.212	420.796	458.417	499.525	837.829	457.822	484.412	710.947	676.89	497.401	800.751	8.47997e-08	2.36109e-06
AT5G47610	102.628	101.865	46.3849	172.058	123.406	76.6802	145.016	119.759	82.042	169.695	114.082	220.291	120.859	133.573	278.88	206.411	209.037	195.305	8.51484e-08	2.36755e-06
AT4G01630	68.4185	7.54554	4.1231	7.20662	9.49273	0	13.4452	6.60737	0	1.60848	0	4.51417	0	0	0	0	0	4.34011	8.71834e-08	2.4208e-06
AT1G68890	1700.53	1798.67	1796.64	1675.54	1896.17	1600.7	1147.64	1523.83	1523.07	1309.3	1326.9	1228.76	1339.85	1420.27	1251.03	1401.06	1418.24	1102.39	8.76724e-08	2.43105e-06
AT2G16850	264.846	292.39	339.125	266.645	344.112	325.891	166.144	279.161	296.41	234.034	224.842	162.51	273.733	253.619	163.989	129.151	230.477	125.863	8.86982e-08	2.45277e-06
AT2G22800	56.2797	60.3643	43.2926	68.4629	59.3296	51.1201	78.7502	59.4663	58.2233	162.456	97.4684	99.3117	117.657	98.0659	191.484	141.835	120.062	90.0573	8.86415e-08	2.45277e-06
AT1G07430	167.736	738.52	249.448	409.877	450.905	157.62	398.553	854.829	153.498	14.4763	98.576	16.251	129.663	54.1053	35.351	20.7564	45.0234	17.3604	8.90366e-08	2.45877e-06
AT3G14230	1778.88	1965.61	1817.26	1632.3	1581.73	1672.05	1883.28	1676.62	1869.76	2326.67	2020.25	2055.75	2026.58	2216.63	2235.95	2309.73	2478.43	2261.2	9.14302e-08	2.52143e-06
AT3G05730	1735.84	2080.68	1838.9	973.795	2293.68	2048	759.652	1379.29	1755.96	4040.5	2137.66	3839.75	2924.62	2582.68	3360.31	3846.86	3656.54	4014.6	9.19122e-08	2.53127e-06
AT4G12910	1081.45	1075.24	1234.87	1262.96	1332.54	1151.27	1314.74	1217.41	1169.76	924.072	1000.16	869.428	958.864	870.758	886.72	674.583	730.022	946.144	9.29023e-08	2.55507e-06
AT1G70985	66.2115	48.1028	63.9081	63.058	41.5307	89.4602	58.5825	28.0813	55.5768	113.398	108.544	164.316	112.855	91.3028	124.71	92.2507	82.5428	130.203	9.48203e-08	2.60428e-06
AT4G38400	240.568	85.8305	130.909	178.364	169.683	152.295	80.671	57.8145	93.9513	105.355	88.6076	340.368	71.2345	108.211	248.439	136.07	126.494	342.869	9.50865e-08	2.60805e-06
AT2G37550	691.91	501.778	624.65	560.315	530.406	531.436	573.34	469.949	514.747	671.54	667.88	742.129	585.083	612.912	808.163	631.917	652.839	777.965	9.55815e-08	2.61808e-06
AT1G72880	623.491	458.392	486.526	583.736	537.526	505.876	636.724	438.564	543.859	640.979	525	852.275	544.264	643.346	702.11	785.284	644.263	923.359	9.69498e-08	2.65197e-06
AT3G06960	346.507	377.277	383.449	400.868	369.03	397.246	429.285	392.313	422.119	476.11	450.791	535.38	465.826	511.465	510.625	550.045	516.697	596.765	9.80309e-08	2.67792e-06
AT1G62430	1226.02	1266.71	1410.1	1598.97	1288.64	1306.76	1283.05	1138.12	1265.03	940.156	858.386	1109.58	905.238	916.409	1143.01	1083.95	972.29	1111.07	9.86282e-08	2.69061e-06
AT1G07420	722.808	665.894	667.943	908.935	625.334	617.701	601.191	652.478	649.719	433.485	366.614	613.024	417.802	459.05	427.158	469.326	466.313	531.664	9.90832e-08	2.69938e-06
AT5G46780	176.564	185.809	165.955	169.356	117.473	235.366	238.171	134.625	243.479	533.211	352.215	256.405	394.591	450.596	469.382	402.444	411.642	276.682	1.01332e-07	2.75693e-06
AT2G27920	577.143	427.266	557.65	646.794	566.004	600.661	657.853	492.249	582.233	399.707	419.779	264.53	392.19	410.862	401.626	318.265	371.979	329.848	1.03076e-07	2.80063e-06
AT1G53160	94.9031	190.525	216.463	103.595	142.391	194.895	92.1954	223.825	209.075	99.7257	159.494	88.4777	93.6453	138.645	100.161	69.188	141.502	73.7819	1.03661e-07	2.80898e-06
AT3G15480	1163.11	909.238	999.853	1136.84	993.177	1051.16	1076.57	874.651	915.694	963.479	871.677	1266.67	940.455	1000.95	1225.5	1067.8	1036.61	1354.11	1.03531e-07	2.80898e-06
AT2G33530	695.22	637.598	1020.47	793.629	1008.6	1258.83	962.289	1143.9	1242.54	588.704	657.911	709.627	685.932	688.152	693.272	595.017	675.35	691.163	1.03806e-07	2.80913e-06
AT1G32080	7392.51	5545.03	9164.63	7266.08	8528.03	8760.71	6352.84	7845.43	8458.26	5333.72	6007.6	3326.04	5995.7	5861.98	3123.65	6023.97	5849.82	2507.5	1.08523e-07	2.93287e-06
AT2G26150	13.2423	23.5798	10.3078	3.60331	9.49273	15.975	17.2866	23.1258	14.5558	31.3654	115.19	242.862	24.812	38.0428	92.3053	32.2878	42.8794	338.529	1.09582e-07	2.95755e-06
AT2G39800	18572.3	25205.9	13539.2	28436.4	26097.9	9215.47	17452.8	40115.8	10519.9	3246.72	6519.3	1893.24	8596.96	4992.91	3093.21	2460.79	5590.4	2195.01	1.13259e-07	3.0527e-06
AT5G41040	236.154	105.638	123.693	180.166	85.4346	66.0301	83.5521	100.762	67.4861	46.6459	54.2722	83.0607	38.4186	47.3422	70.7019	106.088	48.2393	95.4825	1.14e-07	3.06859e-06
AT2G43910	3884.41	4018	4476.66	3790.68	3984.57	3931.99	4272.68	3986.72	4006.82	5632.9	5337.5	5001.7	4643.05	4728.3	5424.41	5002.3	4964.36	4867.43	1.15088e-07	3.09378e-06
AT3G19960	1719.29	1461.95	1494.63	1656.62	1511.72	1389.83	1561.56	1509.78	1501.9	1129.96	1221.68	1473.42	1160.56	1147.2	1456.26	1143.91	1103.07	1621.03	1.16054e-07	3.11559e-06
AT1G16500	190.91	229.196	232.955	165.752	233.759	253.471	218.964	247.776	272.591	190.605	199.367	115.563	198.496	170.77	104.089	200.645	230.477	100.908	1.17563e-07	3.15193e-06
AT4G24480	400.579	685.701	510.234	481.943	456.838	455.821	451.373	633.482	598.112	364.321	460.76	228.417	435.411	388.882	326.996	310.193	373.051	272.342	1.19466e-07	3.19872e-06
AT4G23000	231.74	316.913	278.309	220.703	253.931	254.536	242.013	396.442	365.219	175.324	183.861	180.567	276.934	180.069	209.16	194.88	210.109	118.268	1.2024e-07	3.21518e-06
AT2G39770	2967.38	2425.89	2602.71	2624.11	2781.37	2687	3415.07	2714.8	2695.48	3225.81	3496.68	3923.71	3163.93	2955.5	3582.23	2923.19	2822.54	3803.02	1.20763e-07	3.22067e-06
AT5G66230	231.74	216.934	248.417	186.471	212.4	289.681	117.165	210.61	185.256	123.049	152.848	73.1295	160.078	242.629	93.2873	127.998	192.957	56.4214	1.20654e-07	3.22067e-06
AT2G31570	1403.68	1115.8	1231.78	1550.32	1122.52	1209.84	1500.1	1062.13	1257.09	1236.92	1159.65	1751.5	1177.37	1230.05	1553.48	1484.08	1363.56	1612.35	1.2171e-07	3.24164e-06
AT5G54720	59.5903	33.0117	56.6927	49.5455	85.4346	94.7852	60.5032	47.9034	93.9513	201.864	138.449	90.2833	156.076	125.119	95.2512	175.276	151.15	132.373	1.21984e-07	3.24467e-06
AT5G52250	11.0352	21.6934	8.24621	16.2149	16.6123	10.65	41.2959	18.1703	23.8186	72.3816	34.3354	36.1133	29.6143	57.4869	92.3053	94.557	102.911	84.6322	1.23775e-07	3.288e-06
AT5G44580	1393.75	1750.57	2090.41	1791.75	1489.17	1948.95	1803.57	1382.59	1988.86	2518.07	2798.89	2616.41	2189.06	2269.89	2884.05	1976.47	2567.4	2971.89	1.24032e-07	3.29049e-06
AT2G45590	1145.46	1225.21	1196.73	1188.19	1274.4	1375.98	1182.21	1205.02	1189.61	1059.99	930.38	816.161	1120.54	982.35	747.28	1097.78	888.675	823.536	1.25992e-07	3.33813e-06
AT4G02420	548.452	756.44	762.774	633.282	980.125	1154.46	1001.66	710.292	1001.71	587.095	509.494	418.915	553.068	557.116	433.049	731.087	573.512	476.327	1.27584e-07	3.37588e-06
AT5G20250	285.813	49.046	30.9233	287.364	85.4346	110.76	101.799	54.5108	47.6373	1315.74	192.722	664.485	243.318	633.202	829.766	3594.32	2047.49	651.017	1.28174e-07	3.38706e-06
AT4G18240	2832.75	2143.88	2865.56	3902.39	2896.47	2811.61	2789.87	3047.65	3109.66	2020.25	1819.78	2026.86	2012.17	2046.7	1950.2	2338.56	2241.52	2047.45	1.36193e-07	3.5943e-06
AT3G16990	322.229	282.015	290.679	381.05	447.345	372.751	421.602	464.994	337.431	291.939	238.133	146.259	223.308	223.185	170.863	245.618	260.492	133.458	1.41576e-07	3.73148e-06
AT3G60910	270.363	319.742	248.417	315.29	302.581	320.566	304.437	346.887	305.672	431.877	386.551	554.34	404.996	388.037	525.355	385.147	438.442	480.667	1.51328e-07	3.98233e-06
AT5G45380	231.74	424.437	263.879	312.587	437.852	676.277	762.533	587.23	607.375	1391.33	694.462	406.275	1005.29	913.873	586.237	1051.66	906.899	567.47	1.51487e-07	3.98233e-06
AT5G64850	395.062	325.401	450.449	487.348	336.992	432.391	364.94	277.51	385.068	738.292	461.867	757.477	606.694	616.294	613.732	682.655	582.088	618.466	1.51911e-07	3.98829e-06
AT1G02890	1873.78	1840.17	1735.83	2020.56	1969.74	1817.96	2036.94	1826.11	1857.85	2654.8	2238.45	2313.06	1989.76	2045.86	2612.04	2480.39	2377.66	2622.51	1.53941e-07	4.03636e-06
AT5G45670	755.914	507.438	587.542	963.886	556.511	661.367	614.636	416.264	600.759	570.206	749.842	1189.03	745.961	924.863	969.206	755.303	622.823	845.237	1.56424e-07	4.09616e-06
AT5G21100	1891.44	1444.03	1673.98	2037.67	1563.93	1549.58	1533.71	1583.29	1676.57	1807.93	2250.63	3963.44	2186.66	1918.2	2989.12	1697.41	1655.14	3906.1	1.59944e-07	4.18294e-06
AT4G18570	1144.35	1017.7	1163.75	1316.11	1028.77	1125.71	1136.12	899.428	1077.13	1306.09	1232.75	1998.87	1118.94	1152.27	1683.1	1391.83	1092.35	1892.29	1.60778e-07	4.19932e-06
AT5G60930	391.751	357.47	478.28	240.521	425.986	427.066	190.153	314.676	358.603	246.902	273.576	204.943	301.746	401.563	162.025	250.23	349.467	109.588	1.61928e-07	4.22389e-06
AT4G20000	8.82819	0	0	1.80166	0	0	0	0	0	38.6035	22.1519	21.668	59.2287	28.7435	7.85577	39.2066	34.3035	15.1904	1.64529e-07	4.28623e-06
AT1G51610	800.055	634.769	808.128	874.704	779.591	907.382	734.682	887.866	868.057	474.501	469.62	641.914	551.467	503.856	601.949	585.792	614.247	707.438	1.66069e-07	4.31525e-06
AT3G27020	1261.33	1089.39	1043.15	1550.32	1234.06	977.672	1583.65	1216.58	1175.05	1320.56	1206.17	1622.39	1363.86	1192.85	1441.53	1491	1515.79	1662.26	1.66043e-07	4.31525e-06
AT1G13110	2475.2	2374.96	2508.91	2709.69	2707.8	3152.41	4113.26	2285.32	3698.5	7288.02	5055.06	3463.27	5349.79	4781.56	5213.29	7135.59	6129.61	4132.87	1.68304e-07	4.36771e-06
AT1G18870	553.969	775.304	486.526	707.15	549.392	370.621	817.274	679.733	412.856	194.626	388.766	144.453	315.353	238.402	128.638	184.501	250.844	123.693	1.68925e-07	4.37821e-06
AT1G70270	6.62115	0	2.06155	9.00828	2.37318	6.39001	3.84147	1.65184	0	12.8678	6.64557	39.7247	1.60078	5.07238	27.4952	20.7564	4.28794	36.8909	1.71128e-07	4.42963e-06
AT1G27090	2098.9	1640.21	1803.86	2356.57	1969.74	1978.77	1959.15	1862.45	2060.31	2249.46	1998.1	2935.11	1973.76	2079.67	2897.8	2869	2399.1	2966.47	1.71524e-07	4.43422e-06
AT5G44060	225.119	232.969	226.771	198.182	229.012	220.456	243.934	161.055	183.933	368.342	421.994	297.935	280.136	295.043	263.168	379.381	350.539	311.403	1.73249e-07	4.47308e-06
AT2G33570	487.758	275.412	494.772	487.348	421.24	530.371	454.254	333.672	500.191	502.65	469.62	1278.41	407.397	605.304	846.459	653.827	542.424	1257.55	1.75321e-07	4.52081e-06
AT3G28760	400.579	434.812	475.188	392.761	520.914	423.871	386.068	468.297	492.252	333.76	424.209	306.06	349.769	387.191	271.024	356.318	369.835	296.213	1.75923e-07	4.52481e-06
AT5G25130	231.74	153.74	206.155	198.182	109.166	149.1	117.165	161.055	128.356	67.5561	57.5949	95.7003	76.0368	59.1777	85.4315	133.764	106.126	83.5471	1.757e-07	4.52481e-06
AT1G07050	12.1388	13.2047	28.8617	16.2149	28.4782	23.4301	24.0092	33.0369	47.6373	1.60848	2.21519	5.417	0	10.1448	1.96394	2.30627	8.57588	4.34011	1.76582e-07	4.53026e-06
AT1G44800	567.211	385.766	269.033	187.372	282.409	272.641	143.095	232.084	197.165	491.391	657.911	573.299	685.132	678.853	472.328	344.787	541.352	372.165	1.76428e-07	4.53026e-06
AT3G50560	36.4163	9.43192	32.9848	41.4381	15.4257	23.4301	9.60369	9.91106	31.7582	58.7095	15.5063	353.008	20.8101	64.2501	167.917	167.204	60.0311	227.856	1.7741e-07	4.54574e-06
AT5G65840	1826.33	1675.11	2227.51	2169.19	2119.25	2017.11	1920.74	2424.08	2006.06	1372.03	1633.7	1010.27	1840.89	1614.71	1135.16	1399.9	1551.16	1036.2	1.78774e-07	4.5749e-06
AT3G54640	1085.87	928.101	1150.35	989.109	1058.44	1167.24	1590.37	1012.58	1140.65	4268.1	2757.91	1309.11	3207.15	2312.16	1201.93	3511.29	2496.65	1471.3	1.80142e-07	4.6041e-06
AT1G66260	1861.65	1845.83	1822.41	1841.29	1827.35	1891.44	2019.66	1829.42	1913.43	2296.91	2061.23	2477.37	2096.21	2073.76	2412.7	2188.65	2141.83	2579.11	1.81641e-07	4.63654e-06
AT5G23210	704.048	776.247	1013.25	900.828	870.958	907.382	786.542	673.952	821.743	1754.05	1397.78	830.607	1374.27	1454.93	1171.49	1398.75	1585.47	884.298	1.86413e-07	4.75237e-06
AT1G07820	1109.04	1089.39	1117.36	1035.95	1194.9	1031.99	823.996	1110.04	1020.23	822.737	848.418	726.781	1044.51	941.771	737.461	864.851	866.164	743.244	1.88244e-07	4.78699e-06
AT3G19680	1314.3	523.472	402.003	2011.55	443.785	643.261	835.521	399.746	738.378	1090.55	511.709	1676.56	618.7	894.429	1092.93	1323.8	1026.96	1874.93	1.88206e-07	4.78699e-06
AT4G19230	225.119	109.41	117.508	199.083	49.8368	124.605	130.61	127.192	101.891	45.0374	64.2405	75.838	40.0194	54.1053	54.9904	73.8006	51.4553	56.4214	1.89574e-07	4.80871e-06
AT5G24120	616.87	750.781	530.85	805.34	658.558	554.866	835.521	967.154	587.526	816.303	784.177	1486.97	803.589	703.369	1459.21	774.906	752.533	1432.24	1.89376e-07	4.80871e-06
AT1G79590	513.139	371.618	353.556	381.951	312.074	398.311	444.651	399.746	403.594	523.56	456.329	622.052	443.415	492.02	539.102	620.386	530.632	633.656	1.9195e-07	4.86289e-06
AT5G57220	44.141	35.8413	24.7386	52.248	26.105	29.8201	186.312	38.8183	124.386	928.897	546.044	140.842	443.415	308.57	192.466	597.323	540.28	99.8226	1.937e-07	4.90109e-06
AT2G26695	40.8304	144.308	59.785	43.2397	58.143	40.4701	81.6313	97.4587	46.314	173.716	272.468	134.522	161.678	158.089	188.539	136.07	162.942	119.353	1.97696e-07	4.99595e-06
AT2G33380	1285.61	1761.88	1279.19	2389.9	1584.1	1214.1	2464.31	2794.09	1122.12	247.706	581.487	588.647	715.546	354.221	710.947	133.764	305.516	804.006	2.00082e-07	5.04994e-06
AT1G01470	2538.11	2312.71	2717.13	3116.86	2393.36	2269.52	2474.87	3230.18	2044.43	890.293	1335.76	2095.48	1138.95	1148.05	2099.45	851.013	1205.98	2312.19	2.01424e-07	5.07118e-06
AT3G12320	708.463	1010.16	815.344	722.464	670.424	693.317	718.356	807.751	721.175	1298.85	1227.22	930.821	1029.3	1079.57	1062.49	898.291	974.434	894.063	2.01303e-07	5.07118e-06
AT3G03560	876.198	936.59	957.591	879.208	990.804	1145.94	998.783	980.369	1070.52	838.018	727.69	668.999	847.61	730.422	724.695	799.122	846.868	693.333	2.0572e-07	5.1729e-06
AT3G44160	534.106	474.426	549.404	496.356	560.071	472.861	346.693	459.212	403.594	349.844	373.26	292.518	408.198	320.405	272.006	440.497	377.339	289.702	2.08058e-07	5.2252e-06
AT5G01410	3714.46	3504.9	4174.64	3367.29	3443.49	3392.03	3696.46	3428.4	3850.68	4539.93	5684.18	9449.05	4491.77	4311.52	7985.39	4318.49	3967.42	8977.52	2.08495e-07	5.22967e-06
AT5G02840	922.546	1206.34	829.775	1020.64	955.206	794.492	926.756	963.85	685.447	1265.87	1177.37	1339.8	1150.16	1013.63	1371.81	1491	1254.22	1131.68	2.11493e-07	5.29832e-06
AT4G21570	1324.23	1432.71	1517.3	1791.75	1416.79	1177.89	1665.28	1654.32	1226.66	882.251	1097.63	795.396	1034.9	987.423	920.107	921.354	956.21	937.464	2.14359e-07	5.36347e-06
AT4G17030	569.419	1343.11	1258.58	428.794	869.772	847.742	322.684	1027.45	793.955	604.788	715.506	534.477	781.178	650.955	554.814	255.996	453.45	311.403	2.15083e-07	5.36832e-06
AT5G13770	1560.38	1511.94	1427.62	1789.95	1547.32	1349.36	1146.68	1485.01	1213.43	1878.7	1853.01	1906.78	1649.6	1799	2026.79	2109.08	2019.62	1935.69	2.14952e-07	5.36832e-06
AT4G33520	1359.54	1500.62	1504.93	1244.94	1406.11	1482.48	1146.68	1513.91	1409.27	1384.9	1473.1	1160.14	1374.27	1329.81	1056.6	1331.87	1281.02	1089.37	2.18769e-07	5.45361e-06
AT1G51800	58.4868	9.43192	18.554	16.2149	14.2391	40.4701	93.1558	9.91106	42.3442	542.862	255.854	309.672	291.341	274.754	121.764	336.715	381.627	134.543	2.22297e-07	5.53473e-06
AT1G02390	118.077	127.331	124.724	230.612	125.779	124.605	204.559	189.962	154.821	59.5137	89.7152	46.0445	62.4302	84.5396	62.8462	94.557	72.895	80.2921	2.25141e-07	5.59865e-06
AT4G36040	2832.75	3338.9	2647.03	3555.57	3549.1	3176.9	4240.99	3762.07	3019.67	9347.68	6432.91	3167.14	7650.9	7732.84	9458.35	6941.87	8813.86	3674.99	2.33571e-07	5.80115e-06
AT4G12390	272.57	183.923	311.294	172.959	194.601	244.951	139.253	175.921	206.428	354.67	352.215	519.129	301.746	263.764	375.113	398.984	332.315	473.072	2.35144e-07	5.83306e-06
AT5G38520	3046.83	2143.88	3154.17	3031.29	2933.25	2648.66	2178.12	3110.42	2727.23	1688.9	1812.03	1745.18	1934.54	1892	1669.35	2103.32	2014.26	1464.79	2.36746e-07	5.86562e-06
AT5G23750	635.63	501.778	570.019	771.109	494.809	575.101	910.43	628.526	538.566	406.141	513.924	673.514	446.616	358.448	644.173	502.766	334.459	709.608	2.41181e-07	5.96819e-06
AT4G25260	293.537	202.786	177.293	336.91	205.28	226.846	184.391	185.006	205.105	275.854	241.456	473.987	248.921	349.149	435.995	334.409	381.627	353.719	2.44395e-07	6.04036e-06
AT1G17650	987.654	716.826	1104.99	953.977	1130.82	1027.73	613.676	895.299	971.271	571.814	649.051	588.647	691.535	749.021	445.815	637.683	558.504	505.623	2.46839e-07	6.09332e-06
AT1G56600	3044.62	3059.72	1377.12	4089.76	2737.47	1694.42	5072.67	3074.91	2033.85	1214.4	1797.63	832.412	1829.69	1182.71	1030.09	1239.62	975.506	907.083	2.48945e-07	6.13781e-06
AT5G47370	708.463	430.096	349.433	937.762	463.957	400.441	933.478	434.435	424.766	473.697	455.222	438.777	582.682	482.721	802.271	404.75	354.827	633.656	2.49994e-07	6.15618e-06
AT5G03630	1888.13	2263.66	1884.26	1866.52	1923.46	2151.3	3545.68	2580.18	2498.31	5557.3	5180.22	2357.3	4474.97	3423.01	2534.47	4513.37	4131.43	3189.98	2.50874e-07	6.17033e-06
AT1G76020	840.885	617.791	830.805	850.382	743.993	677.342	920.994	860.61	662.952	453.591	591.456	536.283	553.868	498.784	538.12	541.973	538.136	514.303	2.52495e-07	6.20269e-06
AT1G11220	52.9692	82.0577	81.4313	34.2315	83.0614	89.4602	39.3751	86.7217	80.7187	50.6671	46.519	23.4737	73.6357	50.7238	29.4591	36.9003	81.4708	15.1904	2.53226e-07	6.21125e-06
AT2G25790	203.048	238.628	300.987	242.323	230.199	251.341	257.379	255.21	272.591	192.213	181.646	182.372	236.915	184.296	142.386	89.9445	155.438	107.418	2.53458e-07	6.21125e-06
AT5G22500	644.458	341.436	295.833	727.869	478.196	286.486	485.947	262.643	303.026	157.631	270.253	286.198	251.322	252.773	357.438	310.193	271.212	302.723	2.56762e-07	6.2846e-06
AT4G39860	387.337	398.97	397.88	346.819	378.523	385.531	302.516	337.802	324.198	271.029	297.943	258.21	282.537	340.695	262.186	281.365	271.212	240.876	2.58549e-07	6.32071e-06
AT1G14510	561.694	722.485	693.712	587.34	696.529	668.822	585.825	640.089	678.831	924.876	846.203	788.173	781.979	813.271	716.839	744.925	805.061	777.965	2.60713e-07	6.36592e-06
AT4G33260	185.392	223.537	171.109	113.504	186.295	227.911	56.6618	186.658	166.73	119.027	103.006	53.2672	144.07	180.069	95.2512	79.5663	140.43	45.5712	2.62606e-07	6.40441e-06
AT3G19130	513.139	541.392	509.203	454.918	506.675	607.051	507.075	429.479	572.971	727.837	705.538	736.712	673.126	640.81	627.48	789.897	708.582	732.394	2.66652e-07	6.49528e-06
AT5G10600	261.535	231.082	263.879	209.893	283.595	275.836	185.351	241.995	223.631	194.626	187.184	128.202	156.876	169.925	117.837	196.033	168.302	79.207	2.67113e-07	6.49867e-06
AT3G10120	101.524	182.979	137.093	77.4712	92.5541	125.67	111.403	128.018	166.73	295.156	292.405	111.048	318.554	213.885	215.052	147.601	314.092	162.754	2.72093e-07	6.61188e-06
AT1G79440	1611.15	1394.04	1539.98	1879.13	1679.03	1480.35	1504.9	1765.82	1757.29	1013.34	937.025	1452.66	988.479	977.278	1336.46	1118.54	1067.7	1613.44	2.76848e-07	6.71937e-06
AT1G30230	3838.06	4762.18	3562.36	3781.68	3803.03	3561.37	3360.33	3724.91	3285.65	4551.19	4288.61	5697.78	4808.73	4728.3	4609.37	4975.77	4622.4	5137.61	2.79496e-07	6.77552e-06
AT5G40060	476.722	614.018	624.65	541.398	609.908	620.896	598.31	589.708	569.001	575.031	477.373	404.469	537.06	473.422	419.302	427.813	433.082	366.739	2.82712e-07	6.84527e-06
AT3G02600	913.718	802.657	821.528	941.365	697.716	817.922	1055.45	815.184	903.785	1020.58	989.082	1076.18	904.438	997.567	1129.27	1003.23	972.29	1087.2	2.84489e-07	6.87273e-06
AT4G33740	663.218	631.939	638.05	870.2	653.812	574.036	677.06	594.663	647.073	856.515	725.475	929.015	740.358	835.251	1035.98	1007.84	821.14	970.015	2.8481e-07	6.87273e-06
AT5G43810	1157.6	1610.03	1347.22	1233.23	1337.29	1185.35	992.061	1286.79	1190.93	1151.67	1057.75	817.967	1186.17	1155.66	923.053	904.057	1024.82	907.083	2.84864e-07	6.87273e-06
AT3G57540	174.357	125.445	132.97	192.777	132.898	97.9802	290.031	234.562	124.386	94.9003	88.6076	129.105	106.452	81.158	175.773	78.4131	120.062	147.564	2.87088e-07	6.91814e-06
AT1G78440	76.1432	43.3869	23.7078	55.8513	47.4637	21.3	32.6525	37.1665	15.8791	1.60848	13.2911	17.1538	3.20155	10.1448	11.7837	4.61254	2.14397	0	2.8851e-07	6.94414e-06
AT3G03130	100.421	130.161	183.478	80.1737	137.645	143.775	48.0184	113.151	128.356	86.0537	71.9937	54.17	67.2326	138.645	70.7019	66.8818	85.7588	55.3364	2.90416e-07	6.9795e-06
AT4G08570	61.7974	557.427	210.278	59.4546	96.1139	110.76	174.787	441.042	72.7792	8.0424	53.1646	16.251	112.855	28.7435	23.5673	2.30627	6.43191	10.8503	2.90669e-07	6.9795e-06
AT2G23690	44.141	22.6366	31.9541	82.8762	23.7318	36.2101	22.0885	18.9962	38.3745	61.1222	68.6709	101.117	43.2209	91.3028	85.4315	59.963	50.3833	91.1423	2.99366e-07	7.17981e-06
AT3G08870	183.185	193.354	237.078	252.232	358.351	337.606	306.358	263.469	363.896	201.864	137.342	91.1862	172.884	197.823	109.981	257.149	179.021	99.8226	3.07731e-07	7.3717e-06
AT1G30720	19.8634	0	2.06155	18.9174	18.9855	0	13.4452	4.95553	0	65.1434	39.8734	101.117	26.4128	43.9606	37.3149	101.476	53.5992	91.1423	3.13449e-07	7.4998e-06
AT2G20950	978.826	1159.18	949.345	1064.78	1107.09	1080.98	1999.49	1683.23	1594.53	1883.53	1776.58	1227.85	2067.4	1468.45	1587.85	1854.24	1812.73	1526.63	3.1641e-07	7.5528e-06
AT4G06534	141.251	142.422	131.939	175.661	136.458	129.93	160.382	218.869	76.7489	46.6459	96.3608	61.3927	81.6395	39.7336	96.2332	43.8191	31.0876	56.4214	3.16242e-07	7.5528e-06
AT3G18440	644.458	732.861	719.482	708.051	704.835	623.026	765.414	748.285	828.359	529.994	611.392	481.21	660.32	544.435	422.248	510.838	473.817	467.647	3.19077e-07	7.60749e-06
AT5G02500	24837	28683.4	23062.6	23039.6	24170.9	23654.8	26866.3	25895.1	26256.1	32607.1	30985	59780.2	29726.4	29932.1	43218.5	35309	31114.4	67524.5	3.20748e-07	7.63834e-06
AT1G77460	719.498	648.916	785.451	638.687	574.31	618.766	679.941	674.778	860.117	1047.12	971.361	849.566	900.436	893.584	829.766	943.264	943.347	1108.9	3.27055e-07	7.77937e-06
AT5G19000	647.769	630.053	621.558	620.67	587.363	637.936	722.197	716.074	677.508	783.33	852.848	915.473	739.558	765.929	751.208	900.598	770.757	1000.4	3.29853e-07	7.83671e-06
AT4G25960	1919.03	1449.69	1657.49	2613.3	1702.76	1773.23	2532.49	1662.58	1669.95	1915.7	1934.97	2883.65	1738.44	1927.5	2363.61	2758.3	1940.29	2584.54	3.34574e-07	7.93956e-06
AT2G20750	654.39	249.003	306.14	681.026	784.337	405.766	570.459	540.153	493.575	227.6	136.234	317.797	295.343	316.178	264.15	275.599	262.636	328.763	3.34996e-07	7.94027e-06
AT5G56610	123.595	116.956	157.709	101.794	142.391	186.375	118.125	156.099	198.489	101.334	103.006	68.6153	128.862	157.244	72.6659	106.088	111.486	91.1423	3.37116e-07	7.98118e-06
AT5G43760	2222.5	1481.76	1691.5	2426.83	1762.09	1911.68	2241.5	1498.22	1961.07	2298.52	1782.12	3181.58	2001.77	2274.12	2611.06	3226.47	2152.55	3302.82	3.44533e-07	8.14725e-06
AT2G31730	44.141	74.5122	107.201	62.1571	49.8368	102.24	36.494	42.9479	100.568	186.584	135.127	271.753	137.667	181.76	142.386	223.708	142.574	214.836	3.47492e-07	8.20762e-06
AT1G04425	69.522	99.9784	77.3082	31.529	86.6212	69.2252	28.8111	75.9848	59.5466	23.323	44.3038	21.668	56.0271	49.033	39.2789	47.2785	27.8716	19.5305	3.49779e-07	8.23281e-06
AT1G46554	236.154	251.832	238.109	272.951	230.199	189.57	257.379	312.198	195.842	123.853	170.57	75.838	168.081	106.52	136.494	106.088	130.782	88.9723	3.49645e-07	8.23281e-06
AT4G21820	73.9361	107.524	113.385	81.0745	128.152	132.06	41.2959	79.2885	101.891	82.0325	96.3608	64.1012	71.2345	106.52	47.1346	50.7379	83.6148	45.5712	3.49054e-07	8.23281e-06
AT1G02640	196.427	75.4554	128.847	142.331	125.779	144.84	128.689	71.8552	103.214	326.521	253.639	271.753	172.884	333.086	282.808	423.2	376.267	184.455	3.52073e-07	8.27719e-06
AT1G76670	2450.93	1875.07	2157.41	2447.55	2014.83	2034.15	2437.42	2022.68	2437.44	2171.45	2229.59	3927.32	2064.2	2361.19	3760.95	2449.26	2031.41	4137.21	3.61436e-07	8.48746e-06
AT5G37770	381.819	194.298	248.417	373.844	177.989	306.721	288.111	147.014	330.814	264.595	219.304	531.769	219.306	261.227	487.058	279.058	230.477	571.81	3.64859e-07	8.5579e-06
AT1G22400	79.4537	24.523	52.5696	77.4712	51.0234	72.4202	155.58	57.8145	79.3955	190.605	134.019	211.263	106.452	128.5	121.764	437.038	215.469	200.73	3.65672e-07	8.56706e-06
AT1G54220	710.67	658.348	783.39	662.108	682.29	726.332	568.538	650	647.073	548.492	582.595	390.927	635.508	594.313	408.5	448.569	527.417	403.63	3.80088e-07	8.87399e-06
AT2G04160	914.822	1209.17	1170.96	1074.69	1393.06	1181.09	1211.02	2326.62	1392.07	858.124	707.753	748.449	1240.6	1000.95	679.524	786.437	1167.39	781.22	3.80067e-07	8.87399e-06
AT3G58270	96.0066	120.729	125.755	111.703	102.047	151.23	113.324	119.759	146.882	75.5985	104.114	68.6153	83.2403	114.974	76.5938	78.4131	94.3347	41.2311	3.79895e-07	8.87399e-06
AT1G19690	264.846	341.436	361.802	273.852	350.045	319.501	278.507	346.061	353.31	260.574	260.285	244.668	282.537	276.444	179.701	229.474	265.852	213.75	3.8356e-07	8.94473e-06
AT1G02100	518.656	645.144	528.788	530.588	624.147	546.346	545.489	588.882	549.152	761.615	693.355	627.469	762.769	692.379	709.965	694.187	761.109	632.571	3.85536e-07	8.97765e-06
AT5G59730	131.319	132.99	132.97	172.058	170.869	178.92	168.065	126.366	153.498	211.515	186.076	224.805	221.707	246.856	215.052	234.086	224.045	215.921	3.85859e-07	8.97765e-06
AT1G19450	1137.73	444.244	795.759	1128.74	726.194	674.147	517.639	483.99	697.357	538.036	677.848	2564.05	529.857	617.139	1255.94	1037.82	690.358	1874.93	3.87375e-07	9.00257e-06
AT5G15500	343.196	844.157	482.403	762.1	539.899	444.106	761.572	1209.15	543.859	288.722	409.81	139.036	533.058	246.01	356.456	192.573	244.413	214.836	3.89532e-07	9.04233e-06
AT3G19150	116.974	97.1488	85.5544	109.901	99.6737	94.7852	178.629	82.5921	156.144	163.261	192.722	208.554	187.291	154.707	202.286	202.952	149.006	238.706	3.9017e-07	9.04675e-06
AT3G20470	369.681	232.025	214.401	386.455	344.112	230.041	277.547	260.165	280.531	521.952	553.798	429.749	557.87	656.027	504.733	488.929	513.481	403.63	3.91651e-07	9.07072e-06
AT1G06830	28.6916	39.6141	39.1695	23.4215	26.105	44.7301	13.4452	13.2147	34.4047	82.0325	66.4557	167.024	60.8295	59.1777	91.3233	159.133	79.3269	80.2921	3.93493e-07	9.10294e-06
AT4G26780	208.566	244.287	262.848	212.595	208.84	214.065	212.241	216.391	220.984	284.701	326.741	476.696	288.14	359.293	401.626	377.075	284.076	490.433	3.94991e-07	9.12717e-06
AT5G06280	374.095	284.844	283.463	399.067	280.036	308.851	357.257	293.202	273.914	466.459	384.335	428.846	409.798	342.385	449.743	425.506	395.562	447.031	3.95706e-07	9.13327e-06
AT5G48570	151.183	125.445	162.863	168.455	198.161	195.96	207.44	201.525	187.903	236.446	307.911	499.267	294.543	248.546	432.067	215.636	202.605	591.34	3.99111e-07	9.20138e-06
AT5G47200	1147.67	830.009	1009.13	1116.13	918.422	1109.73	1181.25	945.68	1138	1137.2	1075.47	1441.82	1059.71	1095.63	1284.42	1081.64	1140.59	1434.41	4.04493e-07	9.31484e-06
AT1G21100	65.1079	45.2732	35.0464	77.4712	45.0905	40.4701	175.747	67.7256	75.4257	1063.2	531.646	119.174	602.692	431.152	148.278	812.96	731.094	150.819	4.0497e-07	9.31522e-06
AT5G65380	976.619	1153.52	1153.44	1221.52	1111.84	1054.35	1429.03	1261.18	1000.38	1405.81	1575	2027.76	1503.13	1209.76	2227.11	1409.13	1415.02	2195.01	4.07166e-07	9.35511e-06
AT1G49650	293.537	254.662	325.725	377.447	316.82	313.111	265.062	331.194	295.086	197.843	147.31	235.639	192.093	185.142	183.629	197.186	229.405	237.621	4.08184e-07	9.36786e-06
AT5G06980	683.082	649.86	596.819	627.877	555.325	656.041	524.361	536.849	693.387	953.828	727.69	1056.31	759.568	892.738	1052.67	1035.51	896.179	921.189	4.09286e-07	9.38253e-06
AT4G27280	124.698	111.297	57.7235	165.752	75.9419	80.9402	188.232	77.6366	131.002	338.585	264.715	168.83	225.709	191.905	825.838	186.808	266.924	246.301	4.11786e-07	9.42915e-06
AT3G01510	663.218	607.416	768.959	690.935	700.089	758.282	578.142	716.074	681.478	506.671	489.557	455.931	437.812	592.623	496.878	482.01	584.232	578.32	4.13631e-07	9.4607e-06
AT1G72700	950.134	977.147	894.713	919.745	900.623	921.227	1314.74	1103.43	907.755	665.911	755.38	655.457	702.74	710.978	789.505	694.187	674.278	890.808	4.24297e-07	9.6937e-06
AT5G53300	5172.22	6413.71	4813.72	5791.42	5356.27	5278.15	5627.76	5247.9	5299.65	7606.5	6861.55	6941.88	6760.87	6464.74	7264.62	6487.53	7086.89	7719.97	4.25431e-07	9.70865e-06
AT2G43160	2974	2777.7	2838.76	3182.62	2757.64	3044.84	3259.49	2567.79	3046.14	3965.71	3381.49	3763.01	3127.91	3409.48	3752.11	4174.35	3659.76	4055.83	4.26098e-07	9.71293e-06
AT3G07390	2659.49	1833.57	2328.52	2768.24	2497.78	2511.28	2876.3	2578.53	2593.58	1986.47	1670.25	2449.39	1801.67	2002.74	2045.45	1955.72	1943.51	2316.53	4.28563e-07	9.75813e-06
AT5G06530	1320.92	2840.9	2844.94	1507.09	1540.2	3001.18	1544.27	1639.45	2765.61	1615.72	1902.85	1272.99	1303.83	1534.39	1275.58	1508.3	1396.8	1203.3	4.33734e-07	9.86476e-06
AT3G10310	135.733	142.422	176.263	126.116	176.802	177.855	79.7106	135.451	134.972	141.546	97.4684	69.5182	90.4438	126.809	68.738	107.241	109.342	49.9113	4.40925e-07	1.00171e-05
AT5G19230	81.6608	33.9549	30.9233	28.8265	35.5977	38.3401	86.4332	37.1665	26.4652	234.034	206.013	104.729	188.891	108.211	87.3955	200.645	153.294	90.0573	4.47881e-07	1.01637e-05
AT3G03170	49.6586	49.046	32.9848	33.3306	52.21	31.9501	29.7714	61.9441	21.1721	12.8678	17.7215	12.6397	16.0078	12.6809	17.6755	23.0627	8.57588	4.34011	4.56787e-07	1.03542e-05
AT4G25500	1498.59	1566.64	1327.64	1555.73	1410.86	1276.94	1545.23	1694.79	1463.52	1073.66	986.867	872.137	1134.95	1064.35	1058.57	1018.22	1360.35	1044.88	4.65552e-07	1.05411e-05
AT1G23750	203.048	198.07	233.986	207.19	312.074	204.48	145.976	223.825	217.014	118.223	161.709	120.077	148.872	136.954	107.035	104.935	169.374	98.7375	4.68368e-07	1.0593e-05
AT5G66950	770.26	884.715	923.575	912.539	795.016	791.297	754.85	864.74	911.724	647.413	650.158	590.453	736.357	608.685	604.894	649.214	675.35	593.51	4.69137e-07	1.05985e-05
AT3G57450	179.874	133.933	152.555	138.727	129.338	134.19	156.54	118.933	169.377	169.695	214.873	263.627	188.891	201.204	228.799	124.538	192.957	199.645	4.80779e-07	1.08494e-05
AT5G14430	1153.18	1073.35	1060.67	1126.03	1053.69	1223.69	1174.53	1054.7	1224.01	1647.08	1443.2	1300.98	1376.67	1596.11	1569.19	1725.09	1536.15	1446.34	4.82715e-07	1.08689e-05
AT5G16730	1649.77	1327.07	1470.92	1986.33	1209.14	1396.22	1743.07	1502.35	1609.08	1354.34	1575	2127.98	1589.57	1519.18	2045.45	1747	1541.51	2168.97	4.82222e-07	1.08689e-05
AT5G60900	491.068	358.413	562.804	491.852	995.55	1281.2	961.329	812.707	1143.29	533.211	336.709	103.826	368.178	393.955	280.844	544.279	393.418	183.37	4.91223e-07	1.10481e-05
AT2G33370	846.403	978.091	692.681	638.687	869.772	760.412	623.279	639.263	762.196	1032.64	1031.17	1609.75	986.077	1203	1327.63	1131.22	1208.13	1406.2	5.00928e-07	1.12539e-05
AT1G33440	92.696	30.1822	46.3849	50.4464	59.3296	61.7701	44.177	41.2961	47.6373	6.43392	16.6139	18.0567	11.2054	18.5987	29.4591	35.7472	28.9436	27.1257	5.03432e-07	1.12976e-05
AT5G58600	304.573	273.526	295.833	348.62	318.007	293.941	231.449	327.065	300.379	216.341	168.354	181.469	164.88	220.648	222.908	169.511	189.741	179.03	5.09807e-07	1.1428e-05
AT4G18970	1500.79	749.838	922.544	1910.66	1035.89	1189.61	1240.8	823.444	1024.2	1322.17	1090.98	2188.47	1060.51	1480.29	1970.82	2744.46	1517.93	1966.07	5.15848e-07	1.15507e-05
AT2G41110	292.434	232.025	265.94	283.761	245.624	339.736	339.01	216.391	321.552	433.485	330.063	545.311	295.343	377.892	466.436	485.469	382.699	566.385	5.33491e-07	1.19325e-05
AT4G04695	110.352	167.888	210.278	99.9919	220.706	302.461	196.876	151.144	317.582	154.414	103.006	54.17	95.2461	138.645	81.5036	169.511	121.134	53.1664	5.40989e-07	1.20869e-05
AT1G75680	3566.59	2251.4	2902.66	3304.24	2862.06	2831.84	3655.16	2621.47	2751.05	2198.79	2456.65	3749.47	2426.78	2598.75	3056.88	2714.48	2320.85	3623.99	5.48304e-07	1.22368e-05
AT2G15580	1026.28	895.09	921.514	1187.29	1063.19	911.642	1149.56	932.465	879.966	1426.72	1108.7	1293.76	1273.42	1328.12	1381.63	1381.45	1279.95	1239.1	5.48936e-07	1.22374e-05
AT5G52882	407.2	144.308	349.433	281.959	246.811	454.756	224.726	147.84	418.149	833.192	344.462	1242.3	373.781	630.665	836.64	1245.38	677.494	1169.66	5.53318e-07	1.23215e-05
AT4G36920	507.621	625.337	613.312	575.629	474.637	651.781	725.078	550.064	723.822	808.261	933.703	1063.54	765.971	821.725	894.576	703.412	750.389	1138.19	5.5725e-07	1.23954e-05
AT4G01430	92.696	14.1479	4.1231	14.4132	7.11955	2.13	69.1465	18.1703	5.29303	6.43392	6.64557	29.7935	11.2054	8.45396	12.7656	13.8376	8.57588	28.2107	5.58938e-07	1.24193e-05
AT2G03480	452.445	321.629	438.08	469.331	386.829	471.796	391.83	395.616	396.977	309.632	344.462	375.579	310.55	344.076	309.321	260.608	281.932	309.233	5.61574e-07	1.24642e-05
AT4G27900	294.641	415.948	570.019	392.761	316.82	462.211	593.508	415.438	604.729	753.573	800.791	516.421	778.777	734.649	739.425	498.154	758.965	673.802	5.89656e-07	1.30732e-05
AT3G16240	6362.92	2273.09	2823.3	5488.74	3757.94	3582.67	2811.96	2356.35	3378.28	4655.74	3731.49	16962.4	3024.66	5760.53	10264.5	14062.5	6735.28	12062.3	5.90584e-07	1.30794e-05
AT5G39850	182.081	316.913	270.063	145.033	174.429	159.75	200.717	166.01	181.286	288.722	313.449	511.004	302.546	362.675	497.86	258.302	284.076	551.194	5.93839e-07	1.31371e-05
AT2G44670	1114.56	1235.58	1276.1	974.696	994.364	1321.67	1086.18	875.477	1587.91	2161.8	2196.36	2438.55	1957.75	1684.87	2574.73	1637.45	1455.76	3161.77	6.17871e-07	1.36539e-05
AT5G61590	1013.04	761.156	826.682	1395.38	692.969	1115.06	1178.37	702.859	960.685	3442.95	1721.2	1178.2	2000.17	2673.14	3318.08	2697.18	2957.61	1460.45	6.19392e-07	1.36726e-05
AT3G13224	404.993	380.107	350.464	404.472	354.791	404.701	411.998	355.146	369.189	460.829	476.266	588.647	401.795	496.247	568.561	372.462	465.241	620.636	6.27116e-07	1.3828e-05
AT3G52560	1514.04	1116.74	1226.62	1293.59	1210.32	1184.28	1331.07	1114.17	1124.77	1440.39	1356.8	1627.81	1371.86	1324.74	1475.9	1500.23	1324.97	1576.55	6.29811e-07	1.38723e-05
AT4G39730	4034.48	2867.31	4422.03	4772.59	4026.11	3891.52	4981.43	4825.86	3881.11	2338.73	3131.17	2612.8	3239.97	3012.15	2557.05	2460.79	2539.53	3083.65	6.31119e-07	1.3886e-05
AT2G35390	658.804	758.327	934.914	721.563	759.419	889.277	841.283	861.436	1014.94	1462.11	1077.69	1349.74	1046.91	1058.44	1325.66	1444.88	1292.81	1144.7	6.37859e-07	1.4019e-05
AT1G01250	156.7	215.991	203.063	343.215	242.065	137.385	314.041	280.813	215.691	45.0374	150.633	95.7003	102.45	84.5396	117.837	70.3412	55.7432	122.608	6.47437e-07	1.42141e-05
AT2G29500	77.2467	84.8873	63.9081	57.653	90.181	63.9001	78.7502	130.496	88.6583	36.995	53.1646	26.1822	68.0329	45.6514	19.6394	20.7564	30.0156	32.5508	6.53466e-07	1.43309e-05
AT4G01410	222.912	226.366	218.524	198.182	271.729	204.48	161.342	169.314	174.67	304.807	278.006	447.805	271.331	307.724	344.672	283.671	262.636	415.566	6.57769e-07	1.44087e-05
AT4G08870	3470.58	5409.21	5452.8	4248.3	4125.78	4966.11	9557.59	5750.89	4673.75	2307.36	4493.51	2203.82	3689.79	2365.42	1721.4	1743.54	2362.65	2195.01	6.58435e-07	1.44087e-05
AT1G65295	515.346	409.346	425.71	520.679	455.651	517.591	519.559	336.976	436.675	537.232	500.633	720.461	424.205	441.297	622.57	653.827	544.568	672.717	6.5953e-07	1.44171e-05
AT4G15450	688.599	834.725	728.759	799.935	808.069	628.351	786.542	1062.96	594.143	386.839	478.481	633.789	541.862	439.606	563.652	347.093	424.506	507.793	6.60773e-07	1.44286e-05
AT2G26650	308.987	278.242	116.478	127.918	166.123	157.62	274.665	199.873	251.419	731.858	610.285	280.781	512.248	361.829	302.447	559.27	559.576	324.423	6.69319e-07	1.45995e-05
AT4G14746	111.456	70.7394	97.9237	127.017	72.3821	108.63	145.976	85.8958	93.9513	128.678	103.006	216.68	122.459	98.9113	145.332	183.348	130.782	230.026	6.9336e-07	1.51076e-05
AT5G07030	2749.98	2142.93	2256.37	1443.13	2294.87	2061.84	1274.41	2065.63	1822.13	1024.6	1823.1	1246.81	1698.42	1607.94	1220.59	871.769	1156.67	820.281	6.9597e-07	1.51482e-05
AT3G63120	442.513	392.368	409.218	592.745	433.106	392.986	500.352	441.042	477.696	419.813	465.19	878.457	457.021	490.33	754.154	449.722	452.378	1018.84	7.14043e-07	1.55249e-05
AT2G34190	161.115	147.138	198.94	86.4795	150.697	187.44	72.988	152.795	178.64	49.8629	98.576	83.9635	100.849	110.747	53.0265	87.6382	108.27	62.9316	7.16233e-07	1.55558e-05
AT3G24590	972.205	891.317	1115.3	1062.08	1160.49	1018.14	895.064	967.98	914.371	787.351	697.785	789.979	846.81	725.35	676.578	833.716	794.341	761.69	7.18118e-07	1.558e-05
AT2G30870	4683.36	5047.97	5473.42	4218.58	5207.95	5793.61	7593.64	5300.76	6462.79	13968	11618.7	5012.53	11042.9	9425.32	5722.93	11526.7	9800.08	6847.61	7.23296e-07	1.56755e-05
AT4G05190	260.432	249.946	283.463	187.372	240.878	314.176	124.848	220.521	259.358	206.69	259.177	117.368	200.097	249.392	119.801	199.492	226.189	72.6969	7.33018e-07	1.58692e-05
AT1G74710	487.758	490.46	386.541	410.778	395.135	394.051	458.096	497.205	415.503	717.382	570.411	462.251	672.326	578.251	512.589	701.106	539.208	550.109	7.4707e-07	1.61562e-05
AT1G19960	2525.97	3070.09	2858.34	2631.32	5464.25	5005.51	4933.41	4739.14	4529.51	1732.33	1487.5	275.364	1418.29	2052.62	1255.94	2119.46	1702.31	473.072	7.5676e-07	1.63308e-05
AT4G22305	211.877	174.491	313.356	126.116	313.26	406.831	253.537	246.951	361.249	191.409	199.367	102.923	150.473	201.204	123.728	223.708	198.317	124.778	7.56603e-07	1.63308e-05
AT1G26830	1050.56	1079.01	1057.58	1130.54	1217.44	1169.37	1063.13	1081.13	1077.13	1309.3	1259.34	1299.18	1238.2	1170.87	1329.59	1358.39	1285.31	1380.16	7.69396e-07	1.65682e-05
AT5G45030	570.522	576.291	647.327	563.017	622.961	740.177	641.526	640.089	734.408	442.332	482.911	428.846	553.068	433.688	429.122	462.407	466.313	503.453	7.6861e-07	1.65682e-05
AT5G58590	478.93	581.95	483.434	446.811	481.756	497.356	484.026	472.427	463.14	624.09	703.323	1159.24	676.327	670.399	919.125	706.871	552.072	1088.28	7.80987e-07	1.67999e-05
AT5G55730	1367.27	887.544	1087.47	1418.8	1156.93	1161.92	1206.22	897.777	987.15	872.6	1004.59	2322.09	1069.32	1179.33	1669.35	1216.56	928.339	1930.26	7.83497e-07	1.6836e-05
AT3G15010	744.879	774.361	825.652	774.712	798.576	804.077	702.03	761.5	809.834	1071.25	1036.71	1440.02	882.027	1022.93	1170.51	945.57	992.658	1413.79	8.11407e-07	1.74173e-05
AT3G16850	2796.33	1660.96	1781.18	2902.47	1931.77	1979.84	2293.36	1712.14	1967.68	2144.91	1925	3129.22	1769.66	2443.19	2986.18	2913.97	2594.2	2803.71	8.1407e-07	1.74559e-05
AT2G39900	902.683	618.734	877.19	797.233	856.719	808.337	581.023	741.677	729.115	478.523	480.696	543.506	609.895	631.511	523.391	476.244	538.136	505.623	8.1543e-07	1.74666e-05
AT3G63380	49.6586	39.6141	26.8002	38.7356	33.2246	47.9251	108.522	60.2923	27.7884	505.867	322.31	92.9918	194.494	140.336	42.2248	230.627	140.43	67.2717	8.1764e-07	1.74954e-05
AT1G02940	11.0352	95.2624	39.1695	12.6116	30.8514	17.04	7.68295	59.4663	37.0512	4.0212	11.076	7.22267	30.4147	6.76317	0	2.30627	6.43191	2.17006	8.26517e-07	1.76308e-05
AT1G25422	23.174	18.8638	6.18466	5.40497	11.8659	6.39001	7.68295	17.3443	10.5861	0	0	0	8.00388	10.1448	7.85577	4.61254	4.28794	2.17006	8.2658e-07	1.76308e-05
AT3G22550	396.165	606.473	735.974	416.182	552.952	620.896	492.669	649.174	600.759	249.314	416.456	355.716	365.777	338.158	338.78	247.924	160.798	305.978	8.25001e-07	1.76308e-05
AT1G09970	1479.83	2303.28	1600.8	1373.76	1478.49	2033.09	2778.35	1688.18	2551.24	5349.8	5721.84	1816.5	5377.8	3029.9	2423.51	3512.45	4083.19	2576.94	8.2915e-07	1.7667e-05
AT5G09890	846.403	679.099	804.005	723.365	645.506	741.242	714.514	578.145	742.347	858.928	839.557	935.335	770.773	805.662	935.819	788.744	846.868	941.804	8.52661e-07	1.81489e-05
AT2G45400	155.597	150.911	155.647	163.951	135.271	106.5	96.0369	109.022	109.83	173.716	166.139	317.797	147.271	213.04	282.808	279.058	145.79	339.614	8.57842e-07	1.824e-05
AT1G27730	46.348	50.9324	24.7386	45.0414	21.3586	51.1201	136.372	46.2516	66.1629	400.511	372.152	39.7247	264.128	162.316	564.634	146.448	171.518	96.5675	8.73294e-07	1.8549e-05
AT5G43260	478.93	462.164	475.188	506.265	491.249	558.061	612.715	601.271	580.91	360.299	353.323	364.745	448.217	327.168	345.654	352.859	455.594	379.76	8.85493e-07	1.87884e-05
AT5G50400	1064.9	1340.28	933.883	2067.4	2184.52	1841.39	4857.54	6107.69	4159	973.934	953.639	564.271	2931.82	1941.87	1348.25	1624.77	2821.46	1527.72	8.97437e-07	1.90219e-05
AT1G51200	3588.66	4780.1	3525.25	3951.93	3546.72	3601.84	4153.59	3926.43	3784.52	5252.49	5186.87	4949.33	4596.63	4785.79	5332.11	5084.17	5072.63	5528.22	9.03759e-07	1.91159e-05
AT3G59940	2937.58	1839.23	2276.98	3803.3	2267.58	2061.84	2838.85	2475.29	1812.86	5228.36	4108.07	3268.26	3809.84	4851.73	8314.35	4584.86	5186.26	3548.04	9.03588e-07	1.91159e-05
AT4G13590	1540.52	1608.14	1631.72	1499.88	1483.24	1665.66	1467.44	1634.5	1495.28	1283.57	1262.66	1338	1289.42	1162.42	1209.79	1279.98	1210.27	1355.2	9.20293e-07	1.94453e-05
AT2G22125	4610.52	3304	3940.66	4663.59	3826.76	4127.95	4223.7	3345.81	4370.72	4354.96	3879.91	6059.82	3437.66	3969.98	5337.01	4443.03	4051.03	6366.94	9.32604e-07	1.96848e-05
AT5G07220	1578.04	1259.16	1522.46	1785.44	1255.41	1451.6	1914.98	1173.63	1509.84	1409.83	1476.42	1815.6	1435.9	1391.52	1853.96	1604.01	1433.24	2095.19	9.41787e-07	1.9858e-05
AT1G14300	184.289	207.502	249.448	118.008	145.951	143.775	152.699	213.088	172.023	225.187	242.563	295.226	296.143	240.092	329.942	259.455	246.556	337.444	9.46973e-07	1.99465e-05
AT4G22270	179.874	150.911	106.17	127.017	93.7407	95.8502	179.589	142.058	95.2745	59.5137	83.0696	76.7408	82.4399	75.2402	65.7921	65.7286	72.895	84.6322	9.63002e-07	2.02631e-05
AT5G58900	452.445	504.608	536.003	609.86	537.526	468.601	547.41	525.286	522.687	682.8	590.348	921.793	593.888	611.221	786.559	724.168	620.679	979.78	9.70265e-07	2.03947e-05
AT3G16420	3414.3	3231.38	2049.18	2103.43	2337.59	1676.31	4568.47	2294.41	1961.07	6109.01	7964.72	4047.4	5684.35	6016.68	4074.2	7404.27	5342.77	3954.93	9.73321e-07	2.04377e-05
AT1G26260	199.738	292.39	248.417	202.686	263.423	218.325	190.153	245.299	279.207	189.801	196.044	97.506	178.486	218.112	108.999	147.601	225.117	141.054	1.00094e-06	2.09959e-05
AT4G32150	1607.83	1809.04	1533.79	1949.39	1408.48	1494.2	2144.5	1773.25	1643.49	2475.45	2104.43	2003.39	2109.82	2084.75	2431.36	2549.58	2472	2565.01	1.00871e-06	2.11369e-05
AT4G36910	308.987	442.357	469.003	271.149	302.581	362.101	274.665	408.005	424.766	324.913	423.101	213.069	415.401	355.912	281.826	247.924	300.156	251.726	1.01341e-06	2.12135e-05
AT1G32920	150.079	105.638	70.0928	132.422	92.5541	100.11	163.263	84.244	148.205	370.755	374.367	104.729	340.965	476.803	493.932	227.167	302.3	166.009	1.01767e-06	2.12807e-05
AT2G18196	16.5529	51.8756	32.9848	12.6116	9.49273	21.3	19.2074	11.5629	18.5256	98.1173	88.6076	103.826	42.4205	59.1777	121.764	18.4501	61.1031	72.6969	1.02605e-06	2.14117e-05
AT2G22450	454.652	384.823	411.28	599.051	461.584	439.846	597.349	558.323	490.929	298.373	240.348	453.222	274.533	361.829	403.59	371.309	361.259	592.425	1.02568e-06	2.14117e-05
AT4G32770	845.3	619.677	1193.64	1115.22	1120.14	969.152	978.616	1233.1	1094.33	521.952	721.044	777.339	661.12	590.086	666.759	536.207	602.455	655.357	1.0331e-06	2.15366e-05
AT5G58490	1201.74	1302.55	1314.24	1267.46	1245.92	1297.17	1240.8	1356.99	1307.38	1038.27	1094.3	939.849	1227.79	1188.63	1092.93	1092.02	1160.96	1086.11	1.05924e-06	2.20587e-05
AT2G28500	52.9692	88.6601	56.6927	93.6861	67.6357	47.9251	96.9972	97.4587	68.8094	20.106	39.8734	17.1538	32.0155	21.9803	10.8017	23.0627	39.6634	15.1904	1.06703e-06	2.21982e-05
AT1G68570	1062.69	2163.68	1893.54	1398.08	1470.19	1371.72	1237.92	2136.66	1312.67	713.361	1071.04	866.72	1186.17	811.58	1009.47	464.713	635.687	817.026	1.07391e-06	2.23183e-05
AT3G30300	1401.48	1375.17	1222.5	1511.59	1433.4	1282.26	1372.37	1529.61	1335.17	1102.61	1174.05	1091.53	1241.4	1148.05	1075.26	1140.45	1058.05	1009.08	1.07651e-06	2.23494e-05
AT2G34860	2531.48	2173.12	2771.76	2497.09	2750.52	2791.37	1881.36	2665.25	2377.89	2035.53	2127.69	1623.29	2197.86	2144.77	1726.31	2165.59	2141.83	1614.52	1.08116e-06	2.24231e-05
AT5G61600	111.456	105.638	52.5696	90.0828	58.143	83.0702	143.095	66.0737	92.628	460.829	251.424	104.729	213.703	298.425	753.172	246.771	281.932	159.499	1.09221e-06	2.26291e-05
AT1G10930	459.066	507.438	476.218	411.678	475.823	479.251	360.138	501.334	468.433	402.924	400.949	292.518	405.796	449.751	271.024	345.94	437.37	283.192	1.09394e-06	2.26416e-05
AT3G01990	30.8987	33.9549	30.9233	45.0414	51.0234	20.235	28.8111	49.5553	29.1117	119.832	37.6582	136.328	55.2267	64.2501	137.476	78.4131	139.358	139.969	1.09957e-06	2.27349e-05
AT1G10970	376.302	752.668	398.91	1208.91	1479.68	1326.99	4191.05	6204.32	3743.5	576.64	517.247	166.121	2819.77	1593.57	649.083	1277.67	2583.48	722.629	1.10318e-06	2.27546e-05
AT1G23190	3138.42	2424	3135.62	2649.33	2872.74	2948.99	2937.77	2946.89	2802.66	1960.74	2430.06	2174.02	2462.79	2440.66	2256.57	1916.51	2163.27	2308.94	1.10462e-06	2.27546e-05
AT2G36390	3306.16	4308.5	4143.72	4728.45	3939.48	4089.61	4524.3	4954.7	4340.28	2472.23	2579.59	2833.09	3081.49	2829.54	3716.76	2214.02	2470.92	3834.49	1.10502e-06	2.27546e-05
AT4G13010	2168.43	2018.43	2089.38	2703.38	2211.81	2039.48	2716.88	2424.08	2207.19	2334.71	2494.3	2902.61	2413.17	2128.71	2782.91	2249.76	2391.6	3079.31	1.10435e-06	2.27546e-05
AT1G60190	161.115	473.483	231.925	228.81	287.155	90.5252	260.26	469.123	119.093	51.4713	193.829	20.7652	110.453	45.6514	66.7741	25.3689	34.3035	36.8909	1.10752e-06	2.2783e-05
AT1G09640	2996.07	2849.38	2820.2	2563.76	2835.95	2750.9	2672.71	2647.08	2657.1	3155.03	3153.32	4562.92	3396.04	3309.73	3897.44	3489.38	3225.6	4544.1	1.11583e-06	2.29306e-05
AT3G10300	673.15	614.961	689.589	857.588	650.252	700.772	971.893	768.933	778.075	596.746	567.089	548.02	453.019	545.28	608.822	618.08	559.576	603.275	1.12665e-06	2.31295e-05
AT1G07650	1457.76	1627.95	1583.27	1417	1486.8	1830.74	1691.21	1418.93	1861.82	2543.01	1896.2	2659.75	1907.32	2108.42	2455.91	2392.75	2290.83	2686.53	1.12888e-06	2.31517e-05
AT1G30360	4899.65	3392.66	3843.76	6281.47	4237.32	4072.57	4429.22	3890.92	4004.18	3381.83	2587.34	4949.33	2505.21	3207.43	4376.65	4507.6	3665.12	4709.02	1.14485e-06	2.34377e-05
AT2G36270	39.7269	104.694	43.2926	55.8513	56.9564	52.1851	61.4636	66.0737	43.6675	14.4763	42.0886	14.4453	38.4186	15.2171	29.4591	11.5313	10.7198	4.34011	1.14581e-06	2.34377e-05
AT3G26700	278.088	194.298	372.11	288.265	211.213	314.176	287.15	170.14	313.612	320.892	322.31	607.607	261.727	375.356	514.553	417.435	380.555	503.453	1.1463e-06	2.34377e-05
AT5G11670	7533.76	7768.13	7165.95	7888.55	9356.27	10467.9	12927.5	8651.53	12515.4	23479	17331.6	8201.34	17368.4	15432.7	11032.4	19534.1	19658.1	11832.2	1.15024e-06	2.34946e-05
AT5G38970	57.3833	41.5005	41.231	28.8265	47.4637	61.7701	23.0488	14.0407	23.8186	93.2918	117.405	94.7975	86.4419	87.9212	106.053	43.8191	39.6634	82.4621	1.1546e-06	2.356e-05
AT3G50760	313.401	430.096	411.28	499.959	389.202	268.381	611.755	438.564	349.34	145.567	282.437	220.291	296.143	175.842	185.593	171.817	154.366	219.176	1.16407e-06	2.37292e-05
AT5G66530	1980.83	1199.74	1746.13	1780.94	1991.1	1799.85	1396.38	1649.37	1662.01	1094.57	973.576	1121.32	1081.32	1218.22	870.027	1353.78	1165.25	991.715	1.18076e-06	2.40452e-05
AT5G43750	2157.39	1773.2	2558.39	2189.91	2605.76	2479.33	1958.19	2224.21	2215.13	1764.5	1744.46	1235.98	1732.84	1675.57	971.17	1926.89	1927.43	950.484	1.19529e-06	2.43166e-05
AT5G19120	269.26	191.468	138.124	265.744	140.018	235.366	166.144	147.014	123.063	840.431	438.608	407.178	402.595	814.962	1821.56	904.057	990.514	278.852	1.19886e-06	2.43649e-05
AT3G06160	57.3833	42.4437	32.9848	70.2646	30.8514	40.4701	36.494	47.0775	34.4047	17.6933	11.076	32.502	14.407	21.1349	21.6034	16.1439	10.7198	13.0203	1.20036e-06	2.43707e-05
AT3G05320	46.348	24.523	37.1079	38.7356	11.8659	30.8851	47.0581	23.1258	44.9908	84.4452	38.7658	138.133	71.2345	65.0955	72.6659	127.998	93.2627	105.248	1.21736e-06	2.46912e-05
AT3G51720	310.09	278.242	322.633	182.868	296.648	291.811	126.769	251.906	217.014	179.345	182.753	169.733	191.293	202.05	106.053	186.808	196.173	101.993	1.2415e-06	2.51556e-05
AT5G29000	231.74	299.935	282.433	193.678	302.581	235.366	244.894	303.939	325.521	249.314	292.405	128.202	234.514	205.431	150.242	207.564	201.533	166.009	1.2437e-06	2.51749e-05
AT1G07720	1077.04	971.488	848.329	1386.37	1200.83	1085.24	1762.28	1272.74	1136.68	1027.01	1116.46	1353.35	1179.77	974.742	1142.03	1194.65	1054.83	1464.79	1.24816e-06	2.51898e-05
AT1G34580	180.978	326.345	171.109	79.2729	131.712	134.19	117.165	215.565	191.872	79.6197	200.475	39.7247	147.271	109.901	61.8642	36.9003	78.2549	47.7412	1.24793e-06	2.51898e-05
AT5G11500	1753.5	2014.66	1780.15	1781.84	1904.48	1757.25	1784.37	1939.26	1819.48	2340.34	2231.8	2516.2	2113.02	2351.89	2505.99	2170.2	2313.34	2719.08	1.24752e-06	2.51898e-05
AT2G16650	145.665	162.229	157.709	142.331	118.659	125.67	104.68	94.155	127.033	261.378	150.633	237.445	189.692	180.915	195.412	232.933	204.749	207.24	1.25131e-06	2.5228e-05
AT4G15990	11.0352	7.54554	9.27698	7.20662	2.37318	1.065	9.60369	4.12961	0	50.6671	11.076	34.3077	18.4089	19.4441	15.7115	48.4316	40.7354	28.2107	1.29237e-06	2.603e-05
AT3G07700	1272.36	1160.13	1269.92	1710.67	1346.78	1308.89	1856.39	1747.65	1615.7	1632.61	1510.76	1705.45	1570.36	1432.95	1893.24	1401.06	1445.04	1884.69	1.29702e-06	2.60978e-05
AT4G11980	361.956	356.527	420.557	346.819	395.135	351.451	425.443	431.131	414.18	331.347	336.709	278.975	305.748	311.106	263.168	277.905	325.883	259.322	1.31309e-06	2.63949e-05
AT3G13790	180.978	58.4779	39.1695	98.1902	83.0614	85.2002	127.729	78.4625	70.1327	405.337	162.816	292.518	246.519	199.513	107.035	385.147	265.852	245.216	1.33779e-06	2.68418e-05
AT5G40380	576.04	359.356	419.526	644.092	486.503	516.526	599.27	386.531	424.766	379.601	408.703	1414.74	415.401	489.484	862.171	683.809	291.58	1240.19	1.33798e-06	2.68418e-05
AT5G41460	687.496	464.051	538.065	572.026	526.847	502.681	822.076	587.23	537.243	328.13	489.557	459.542	569.876	503.011	553.832	355.165	321.595	477.412	1.37102e-06	2.74775e-05
AT3G50060	221.808	109.41	77.3082	187.372	107.98	105.435	117.165	80.9403	137.619	241.272	126.266	218.486	174.484	203.74	397.698	148.754	199.389	290.787	1.40912e-06	2.8213e-05
AT2G39270	399.476	295.219	371.079	608.96	440.225	477.121	650.17	542.63	571.647	354.67	381.013	496.558	425.006	490.33	562.67	498.154	466.313	662.952	1.41654e-06	2.83335e-05
AT1G16650	98.2137	120.729	131.939	118.909	96.1139	142.71	145.016	134.625	101.891	249.314	175	222.097	167.281	169.079	230.763	264.068	201.533	212.665	1.41829e-06	2.83407e-05
AT3G19050	450.238	466.88	549.404	290.967	449.718	446.236	218.964	428.653	423.442	362.712	304.589	272.656	364.977	431.152	161.043	268.68	396.634	169.264	1.42391e-06	2.84249e-05
AT5G25090	167.736	148.081	139.155	99.9919	177.989	179.985	51.8599	159.403	165.407	73.1858	124.051	44.2388	104.851	145.408	61.8642	72.6474	103.983	35.8059	1.42551e-06	2.84288e-05
AT5G06760	17.6564	41.5005	32.9848	54.0497	14.2391	18.105	34.5733	67.7256	26.4652	1.60848	6.64557	5.417	9.60465	3.38158	12.7656	0	2.14397	8.68022	1.44603e-06	2.88096e-05
AT3G08850	2222.5	2302.33	2387.28	2591.68	2323.35	2135.33	2562.26	2221.73	2291.88	2970.86	2656.01	2959.49	2470	2456.72	2721.04	2790.58	2798.95	3104.26	1.45361e-06	2.89321e-05
AT5G09440	268.156	318.799	155.647	178.364	275.289	273.706	304.437	242.821	288.47	510.692	559.336	428.846	343.366	442.988	593.111	562.729	465.241	473.072	1.48402e-06	2.95084e-05
AT2G01570	2300.85	2008.06	1820.35	2276.39	2050.43	1816.89	2198.28	1825.29	1914.75	2358.03	2124.37	2404.24	2249.89	2247.91	2554.11	2706.41	2269.39	2478.2	1.49301e-06	2.9658e-05
AT3G26960	231.74	111.297	145.339	171.157	132.898	153.36	155.58	114.803	116.447	55.4925	93.038	234.737	75.2364	91.3028	143.368	66.8818	95.4066	214.836	1.5062e-06	2.98908e-05
AT3G60880	283.606	264.094	290.679	284.662	320.38	309.916	268.903	281.639	281.854	420.617	356.646	650.04	360.975	534.29	503.751	385.147	373.051	522.983	1.51063e-06	2.99492e-05
AT5G15350	996.482	356.527	498.896	931.456	609.908	682.667	508.035	364.231	575.617	632.132	465.19	1784	488.236	794.672	1079.19	1216.56	674.278	1349.77	1.52138e-06	3.01328e-05
AT2G31200	725.015	649.86	817.405	663.91	760.605	772.127	764.453	856.481	820.42	599.963	705.538	523.643	664.322	726.195	465.454	471.632	631.399	515.388	1.53346e-06	3.03424e-05
AT1G55850	741.568	1436.48	851.421	884.613	956.393	899.927	1598.05	1262.01	1041.4	2638.71	2871.99	869.428	2699.71	1903.83	1678.19	2241.69	2491.29	1215.23	1.54789e-06	3.05874e-05
AT4G14400	6893.72	7445.56	11351.9	4989.69	15711.7	18692.9	10657.2	10751.8	15959.8	12348.3	9672.63	2676	8068.71	10676.5	5026.71	12667.2	10028.4	4651.51	1.54886e-06	3.05874e-05
AT5G47500	1643.15	1476.1	1250.33	928.754	1433.4	1471.83	508.995	1283.48	1156.53	773.679	847.31	476.696	1275.82	1052.52	416.356	495.848	871.524	160.584	1.5585e-06	3.07476e-05
AT5G16510	608.042	677.212	688.558	631.48	654.999	721.007	649.209	805.273	731.761	575.031	629.114	492.044	619.5	596.85	497.86	582.333	663.559	527.324	1.56964e-06	3.09373e-05
AT3G12710	320.022	200.9	165.955	227.009	205.28	148.035	199.757	145.362	206.428	254.944	279.114	362.036	189.692	294.198	471.346	290.59	378.411	345.039	1.57584e-06	3.09992e-05
AT3G62630	794.537	755.497	812.251	899.927	792.643	775.322	788.463	706.989	869.38	944.982	892.722	1156.53	875.624	978.969	1209.79	1034.36	910.115	1303.12	1.57465e-06	3.09992e-05
AT4G15630	848.61	663.064	612.281	903.53	702.462	634.741	998.783	589.708	707.943	914.421	848.418	1007.56	887.63	812.426	1123.38	1269.6	805.061	1092.62	1.58357e-06	3.11209e-05
AT5G28770	217.394	98.092	95.8622	135.124	103.233	160.815	110.442	67.7256	89.9815	572.619	229.272	219.388	221.707	384.655	276.916	809.5	592.808	164.924	1.6075e-06	3.15606e-05
AT4G28290	59.5903	22.6366	20.6155	57.653	23.7318	36.2101	53.7806	37.9924	18.5256	70.7731	70.8861	64.1012	102.45	70.1679	114.891	102.629	53.5992	84.6322	1.62221e-06	3.18186e-05
AT4G20010	436.996	462.164	491.68	583.736	437.852	459.016	514.758	534.371	500.191	641.783	714.399	679.833	638.709	543.59	700.146	704.565	700.006	668.377	1.62575e-06	3.18264e-05
AT5G06340	928.064	719.656	924.606	1139.55	951.646	1009.62	862.411	913.469	984.504	1101	1074.37	1456.27	978.874	1188.63	1148.91	1149.67	1145.95	1375.82	1.62487e-06	3.18264e-05
AT1G20380	190.91	221.65	259.756	331.505	417.68	392.986	1637.43	3602.67	1622.31	205.081	259.177	201.332	1008.49	367.747	300.483	337.868	929.411	336.359	1.64782e-06	3.2223e-05
AT3G07090	438.099	383.879	497.865	373.844	458.024	467.536	583.904	451.779	479.019	624.09	739.874	1387.65	695.537	590.932	860.207	601.936	502.761	1529.89	1.64919e-06	3.2223e-05
AT1G12990	742.672	442.357	576.204	666.613	912.489	837.092	730.841	806.099	678.831	412.575	359.968	420.72	412.2	497.093	426.176	585.792	407.354	432.926	1.65343e-06	3.22746e-05
AT3G06180	113.663	95.2624	70.0928	117.108	92.5541	90.5252	128.689	138.755	107.184	134.308	126.266	181.469	153.674	125.964	161.043	121.079	124.35	181.2	1.65537e-06	3.22814e-05
AT5G16110	827.643	1296.89	920.483	979.2	1064.37	957.437	886.42	928.336	890.552	1765.31	1476.42	990.408	1523.14	1457.46	1784.24	1397.6	1561.88	1141.45	1.68682e-06	3.2863e-05
AT1G29465	144.562	115.069	131.939	322.496	187.481	173.595	268.903	136.277	131.002	197.843	233.703	257.307	207.3	242.629	318.159	223.708	285.148	252.811	1.68911e-06	3.2876e-05
AT3G06483	2111.04	1829.79	1982.18	2467.37	1979.23	1898.9	1916.9	2163.91	2070.9	1465.32	1282.6	1282.93	1494.32	1381.38	1233.36	1723.94	1778.42	1182.68	1.70769e-06	3.32057e-05
AT5G54630	737.154	453.676	507.142	637.786	503.115	556.996	514.758	441.042	369.189	784.938	591.456	964.226	597.889	692.379	916.179	1082.79	771.829	698.758	1.71265e-06	3.327e-05
AT5G15410	3185.87	2374.02	3345.9	4575.3	3095.82	2944.73	3488.06	3207.05	3325.35	3170.31	2930.7	5368.25	2726.12	3163.47	4178.29	4116.69	3850.57	5577.04	1.72045e-06	3.33895e-05
AT2G38210	72.8326	57.5347	50.508	35.1323	43.9039	43.6651	35.5336	65.2478	41.021	82.8367	104.114	272.656	93.6453	73.5495	249.421	88.7913	33.2315	164.924	1.74351e-06	3.37078e-05
AT3G07320	894.958	487.631	641.143	567.522	704.835	657.106	532.044	588.882	518.717	285.505	440.823	473.085	398.593	382.119	392.789	352.859	353.755	378.675	1.74209e-06	3.37078e-05
AT3G09910	102.628	194.298	85.5544	117.108	109.166	63.9001	116.205	117.281	80.7187	54.6883	39.8734	39.7247	72.0349	32.125	63.8281	18.4501	53.5992	41.2311	1.74061e-06	3.37078e-05
AT5G67380	836.471	798.884	801.944	862.092	814.002	788.102	771.176	868.043	804.541	1022.19	1024.53	873.943	1019.69	1096.48	988.845	1045.89	1047.33	1003.65	1.73905e-06	3.37078e-05
AT3G18830	1101.32	1568.53	1319.39	1117.93	1238.8	1574.07	1803.57	1233.93	1790.37	3512.92	2822.15	1254.04	3138.32	2233.54	2075.89	2428.5	2440.91	1525.55	1.75799e-06	3.39554e-05
AT5G47230	70.6256	39.6141	28.8617	41.4381	21.3586	40.4701	71.0673	46.2516	52.9303	223.579	175	52.3643	179.287	113.283	150.242	99.1695	116.846	104.163	1.76072e-06	3.39756e-05
AT3G18485	26.4846	41.5005	36.0772	41.4381	54.5832	40.4701	99.8783	80.9403	67.4861	21.7145	17.7215	12.6397	36.8178	17.7533	8.83774	25.3689	32.1595	17.3604	1.79719e-06	3.46464e-05
AT2G42530	3926.34	3205.91	3343.84	5917.54	6180.96	2889.35	3780.97	6601.59	3722.32	797.806	784.177	2663.36	1435.09	1114.23	3055.9	714.943	1168.46	3497.04	1.80868e-06	3.48271e-05
AT3G23170	183.185	33.0117	49.4772	263.943	116.286	108.63	222.806	200.699	156.144	59.5137	42.0886	190.498	57.6279	125.964	214.07	152.214	123.278	258.237	1.81173e-06	3.48271e-05
AT3G62700	5718.46	5861.94	5481.67	6999.43	6393.36	5094.97	6860.87	7733.1	5783.96	4539.13	4971.99	5146.15	4776.71	3997.03	4861.74	3882.6	4495.9	5687.72	1.81148e-06	3.48271e-05
AT2G21250	2881.3	2755.07	3152.11	2988.95	2915.46	2855.27	2946.41	3398.67	3067.31	2386.18	2500.95	1857.13	2588.45	2894.64	2049.37	2373.15	2545.96	2109.29	1.82066e-06	3.49656e-05
AT1G62960	583.764	834.725	876.16	599.951	627.707	772.127	589.666	629.352	640.457	970.717	1175.16	1516.76	862.818	929.09	1178.37	1111.62	905.827	1394.26	1.85675e-06	3.5625e-05
AT3G54250	248.293	273.526	268.002	290.067	236.132	227.911	250.656	227.954	269.945	208.298	202.69	167.927	167.281	181.76	151.224	168.358	182.237	142.139	1.86429e-06	3.57358e-05
AT2G34300	920.339	583.836	774.113	882.811	825.868	731.657	923.875	577.319	763.52	709.339	721.044	1508.63	611.496	686.462	1183.28	891.373	686.07	1251.04	1.87293e-06	3.58673e-05
AT5G44380	160.011	45.2732	10.3078	67.5621	46.2771	14.91	54.741	45.4257	10.5861	113.398	59.8101	171.538	96.8469	73.5495	58.9183	186.808	75.0389	145.394	1.94468e-06	3.72062e-05
AT4G26270	441.41	556.484	517.45	399.968	516.167	721.007	735.642	609.53	643.103	473.697	394.304	187.789	483.434	395.645	268.078	282.518	359.115	282.107	1.94899e-06	3.72534e-05
AT1G67900	2425.55	1529.86	1658.52	2899.76	1661.23	1581.53	2234.78	1513.09	1701.71	1848.14	1752.22	2271.53	1780.86	1497.2	2319.42	1916.51	1588.68	1936.77	1.9762e-06	3.77379e-05
AT1G18570	194.22	222.593	121.632	182.868	212.4	251.341	361.099	194.092	264.652	1180.62	677.848	205.846	735.556	512.31	351.546	823.338	762.181	198.56	1.99305e-06	3.79881e-05
AT3G20500	621.284	599.87	521.573	708.051	488.876	569.776	731.801	689.644	557.091	422.226	407.595	595.87	481.833	451.441	662.831	493.541	505.977	697.673	1.99184e-06	3.79881e-05
AT3G51450	521.967	431.039	556.619	380.149	677.544	702.902	899.865	650	590.173	371.559	564.873	157.996	360.975	333.086	141.404	305.581	318.379	171.434	2.00662e-06	3.82108e-05
AT2G46240	377.405	356.527	457.665	454.918	398.695	385.531	363.98	401.398	459.17	303.198	307.911	176.955	334.562	327.168	210.142	282.518	276.572	199.645	2.01973e-06	3.84243e-05
AT1G15950	1899.17	1433.65	1594.61	1583.66	1624.44	1567.68	1756.51	1694.79	1650.1	1755.66	1932.75	3527.37	1792.07	1709.39	3141.33	1708.94	1575.82	3441.71	2.02379e-06	3.84652e-05
AT4G17170	1516.24	1204.46	1228.68	1599.87	1228.12	1444.14	1511.62	1302.48	1327.23	1520.01	1290.35	2069.29	1336.65	1333.19	1834.32	1928.04	1403.23	2031.17	2.03635e-06	3.86678e-05
AT4G00290	375.198	394.254	377.264	335.108	505.488	480.316	427.364	469.949	489.605	386.839	412.025	285.295	345.767	399.027	279.862	369.003	401.994	256.067	2.05385e-06	3.89635e-05
AT4G08460	717.291	728.145	715.358	755.795	666.864	689.057	633.843	746.633	647.073	841.235	894.937	1016.59	829.201	803.126	865.117	900.598	829.716	976.525	2.06006e-06	3.90447e-05
AT3G06720	1220.5	1280.86	1109.11	1256.65	1120.14	1204.52	1308.02	1215.76	1376.19	1589.18	1456.49	1844.49	1363.86	1484.52	1605.52	1552.12	1350.7	1893.37	2.09145e-06	3.96025e-05
AT1G08180	66.2115	105.638	82.4621	74.7687	64.0759	61.7701	101.799	114.803	79.3955	149.589	151.741	106.534	140.868	105.675	126.674	152.214	168.302	144.309	2.12224e-06	4.01481e-05
AT2G20770	198.634	166.002	144.309	129.719	192.228	148.035	153.659	218.043	174.67	102.943	108.544	67.7125	122.459	127.655	65.7921	119.926	103.983	94.3974	2.13609e-06	4.03723e-05
AT1G53035	83.8678	60.3643	90.7083	102.694	97.3005	85.2002	86.4332	66.0737	96.5978	36.995	31.0127	48.753	35.2171	30.4343	60.8822	68.0349	47.1673	70.5268	2.14622e-06	4.05214e-05
AT2G26690	2466.38	1876.95	1620.38	1920.57	1785.82	1292.91	1751.71	1504	1524.39	1399.38	2132.12	3601.4	1829.69	2008.66	2966.54	1491	1537.23	3181.3	2.14908e-06	4.05214e-05
AT5G58250	3619.56	3392.66	3535.56	3323.15	3603.68	3329.2	2503.68	3124.46	3154.65	2543.81	2500.95	2313.96	2822.97	2921.69	1970.82	3015.45	2986.55	2011.64	2.14998e-06	4.05214e-05
AT1G21460	196.427	232.025	157.709	231.513	134.085	202.35	271.784	282.465	227.6	379.601	193.829	382.801	347.368	263.764	383.951	343.634	285.148	388.44	2.15806e-06	4.06357e-05
AT5G48530	87.1784	62.2507	99.9853	80.1737	74.7553	92.6552	56.6618	79.2885	83.3652	143.959	129.589	138.133	136.866	149.635	110.963	114.16	143.646	95.4825	2.16232e-06	4.06782e-05
AT3G06330	489.965	484.801	465.911	573.827	558.885	502.681	539.727	481.512	371.835	627.307	649.051	602.19	580.281	587.55	715.857	676.89	698.934	685.738	2.1786e-06	4.09464e-05
AT5G07000	345.403	255.605	206.155	326.1	256.304	247.081	534.925	156.925	284.5	527.581	631.329	515.518	502.643	464.968	549.904	675.737	511.337	546.854	2.19429e-06	4.12031e-05
AT4G24010	347.61	418.777	317.479	246.827	351.231	301.396	517.639	564.93	460.494	182.562	342.247	171.538	437.012	254.464	257.277	181.042	190.813	219.176	2.21517e-06	4.15564e-05
AT1G07610	804.469	105.638	61.8466	267.546	116.286	48.9901	79.7106	138.755	42.3442	16.0848	33.2279	81.255	17.6085	43.1152	11.7837	61.1161	17.1518	71.6118	2.21846e-06	4.15796e-05
AT3G03050	719.498	592.325	678.251	811.646	609.908	615.571	774.057	578.145	692.064	698.08	670.095	954.295	649.114	678.853	802.271	779.519	661.415	974.355	2.22643e-06	4.16906e-05
AT5G15970	10421.7	8844.32	10522.2	17452.6	13269.7	9179.26	12054.5	15111.9	9294.56	1523.23	2489.87	8168.83	2645.28	2743.31	9753.92	1831.18	2817.18	10780.8	2.25818e-06	4.22459e-05
AT1G76160	1872.68	885.658	1488.44	1632.3	1446.46	1569.81	1636.47	1051.4	1618.34	1844.93	1233.86	3765.72	1253.41	1859.03	2591.42	2779.05	1971.38	3379.86	2.27162e-06	4.24582e-05
AT4G38460	2325.13	2194.81	2610.96	2525.02	2428.95	2608.19	2902.23	3202.1	2625.34	1804.71	2152.06	1204.38	2306.72	2000.21	1561.33	1795.43	2169.7	1272.74	2.33968e-06	4.36898e-05
AT1G01740	141.251	214.105	157.709	156.744	168.496	172.53	153.659	194.092	191.872	261.378	239.241	260.919	269.731	195.286	215.052	260.608	270.14	238.706	2.35644e-06	4.39623e-05
AT4G24220	3134.01	2851.27	3109.85	3952.83	3150.4	3134.3	3893.33	3626.62	3600.58	2854.25	2865.35	3222.21	2890.2	2834.61	3307.28	2963.55	3009.06	3617.48	2.37523e-06	4.4272e-05
AT2G25510	8897.72	8528.35	12395.1	7986.74	17733.6	25424.8	15721.2	14048.9	21296.5	13708.3	12690.8	3465.98	9679.09	14684.5	7427.63	12497.7	14174.9	5685.55	2.39094e-06	4.447e-05
AT3G59880	14.3458	13.2047	17.5232	7.20662	23.7318	10.65	42.2562	18.9962	43.6675	65.1434	43.1962	70.421	57.6279	49.8784	41.2428	35.7472	47.1673	34.7209	2.39245e-06	4.447e-05
AT5G14450	363.059	436.698	521.573	378.348	418.867	464.341	418.721	417.09	464.463	309.632	373.26	224.805	434.61	360.984	284.772	265.221	418.074	259.322	2.39157e-06	4.447e-05
AT3G44110	3546.73	3670.91	3333.53	3536.65	3527.74	3709.4	3912.54	3468.04	3964.48	4482.83	5139.24	8081.26	4417.34	4435.79	6790.33	4165.12	3589.01	8880.95	2.42109e-06	4.49443e-05
AT5G61160	2.20705	1.88638	4.1231	7.20662	16.6123	0	270.824	1.65184	37.0512	1229.68	732.12	126.397	527.455	326.323	88.3774	1214.25	554.216	315.743	2.4224e-06	4.49443e-05
AT1G69610	210.773	367.845	321.602	273.852	245.624	274.771	367.821	346.887	292.44	158.435	250.316	153.482	233.713	153.017	136.494	161.439	135.07	161.669	2.43407e-06	4.51195e-05
AT4G01720	61.7974	77.3418	58.7542	62.1571	90.181	59.6401	103.72	60.2923	82.042	218.753	140.665	122.785	194.494	161.471	96.2332	152.214	243.341	94.3974	2.49116e-06	4.61355e-05
AT1G02650	3.31057	6.60235	6.18466	1.80166	9.49273	2.13	0	3.30369	2.64652	22.5187	15.5063	34.3077	11.2054	5.07238	17.6755	31.1346	12.8638	31.4658	2.51123e-06	4.64222e-05
AT2G23290	134.63	66.9667	83.4928	199.984	56.9564	111.825	74.9088	77.6366	124.386	254.14	135.127	326.826	117.657	174.997	247.457	321.724	222.973	244.131	2.51066e-06	4.64222e-05
AT4G04330	886.13	469.71	920.483	1413.4	1033.52	830.702	848.966	986.15	827.036	458.417	246.994	288.907	352.971	460.741	218.98	644.602	598.168	207.24	2.52431e-06	4.66214e-05
AT2G46450	1013.04	1723.21	1819.32	948.572	1469	1928.72	1518.34	1335.51	2109.27	2785.89	2514.24	1743.37	2353.14	2207.33	2070.98	2057.19	1987.46	1895.54	2.53596e-06	4.67939e-05
AT3G55980	310.09	295.219	264.909	337.81	179.175	372.751	506.114	325.413	420.796	1033.45	826.266	399.052	764.37	556.271	820.928	635.377	825.428	476.327	2.54318e-06	4.68844e-05
AT2G26580	401.683	374.447	360.772	457.621	412.934	389.791	495.55	436.087	328.168	549.296	454.114	511.906	439.413	431.152	551.868	521.217	433.082	682.483	2.5476e-06	4.69232e-05
AT3G04520	573.833	576.291	500.957	563.017	568.377	632.611	858.57	687.993	603.405	459.221	485.127	436.068	544.264	469.195	542.048	422.047	450.234	403.63	2.55744e-06	4.70187e-05
AT4G32070	420.443	296.162	355.618	541.398	399.881	367.426	465.779	391.487	407.563	393.273	416.456	566.979	390.589	397.336	440.905	465.866	396.634	585.915	2.55641e-06	4.70187e-05
AT2G21620	2043.73	2045.78	1986.31	2449.35	2046.87	1907.42	2622.77	2555.4	2233.66	1539.31	1941.61	1585.38	1644.8	1664.58	1481.79	1591.33	1688.38	1848.89	2.6318e-06	4.83182e-05
AT4G23450	49.6586	69.7962	31.9541	76.5704	42.7173	36.2101	53.7806	83.4181	37.0512	46.6459	18.8291	30.6963	28.814	21.9803	16.6935	31.1346	20.3677	19.5305	2.63289e-06	4.83182e-05
AT4G31080	885.026	738.52	845.236	815.249	792.643	760.412	987.259	763.151	766.166	911.204	1011.23	1001.24	1016.49	956.988	1066.42	1122	987.298	1118.66	2.63975e-06	4.84003e-05
AT5G55990	796.745	761.156	816.375	813.448	873.331	931.877	863.371	887.866	926.28	628.111	570.411	682.542	497.041	634.892	659.885	699.952	553.144	703.098	2.64392e-06	4.84328e-05
AT5G55040	835.368	906.408	988.514	906.233	887.57	1038.38	918.112	907.688	991.12	1296.43	1184.02	1133.96	1046.11	1085.49	1162.65	1184.27	1152.38	1169.66	2.68875e-06	4.92095e-05
AT3G62780	37.5198	28.2958	40.2003	18.9174	65.2625	100.11	51.8599	34.6887	70.1327	30.5611	24.3671	10.834	16.0078	21.1349	5.89183	25.3689	16.0798	6.51017	2.69657e-06	4.9308e-05
AT5G12110	313.401	276.355	375.202	342.315	346.485	335.476	263.141	361.754	340.077	402.924	568.196	710.53	604.293	542.744	643.191	378.228	429.866	713.948	2.73021e-06	4.9878e-05
AT3G23820	6072.69	4926.29	5791.93	6853.5	5718.18	5650.9	7292.08	5095.94	5741.61	4729.73	6024.21	13037.8	5305.77	5173.82	9049.85	6311.1	4508.77	13244.9	2.78435e-06	5.07794e-05
AT4G33650	815.504	662.121	628.773	825.158	732.127	757.217	749.088	671.474	703.973	886.272	806.329	926.307	746.762	761.702	817	922.507	828.644	925.529	2.78456e-06	5.07794e-05
AT4G32350	273.674	240.514	235.017	268.447	243.251	214.065	197.836	163.532	175.993	292.743	204.905	387.315	200.097	281.517	256.295	289.437	308.732	442.691	2.80703e-06	5.1143e-05
AT5G04310	22.0705	33.9549	14.4309	23.4215	23.7318	17.04	20.1677	28.0813	21.1721	45.0374	26.5823	46.0445	47.2229	64.2501	57.9363	78.4131	50.3833	45.5712	2.84922e-06	5.1865e-05
AT2G26930	817.711	893.203	886.467	853.985	936.221	931.877	712.594	826.747	948.776	747.943	799.684	626.566	753.165	743.103	546.958	845.247	665.703	636.911	2.87285e-06	5.22482e-05
AT1G79430	357.542	608.359	482.403	328.802	429.546	490.966	270.824	503.812	493.575	333.76	378.798	271.753	361.775	294.198	296.555	243.311	296.94	276.682	2.93483e-06	5.33267e-05
AT5G52920	2813.99	2366.47	2318.22	2780.86	2593.89	2442.05	2227.09	2394.35	2207.19	2530.14	2284.97	6020.99	2232.28	2529.42	4499.39	3013.14	2614.57	5656.25	2.93742e-06	5.33267e-05
AT5G66580	228.43	84.8873	77.3082	239.62	143.578	73.4852	157.5	80.1144	47.6373	182.562	159.494	194.109	177.686	164.007	200.322	181.042	129.71	214.836	2.94553e-06	5.34261e-05
AT4G36570	20.967	143.365	53.6003	36.9339	59.3296	74.5502	26.8903	28.0813	97.9211	219.557	161.709	530.866	232.913	152.171	306.375	212.177	215.469	402.545	2.94974e-06	5.34544e-05
AT5G03940	4052.14	3405.87	3475.78	4550.98	4627.71	3903.23	3313.27	4656.54	4370.72	2968.45	2495.41	2626.34	3115.11	3190.52	2400.92	2849.39	3414.27	2694.12	3.03737e-06	5.49933e-05
AT2G43620	12.1388	15.0911	87.616	136.926	18.9855	23.4301	28.8111	77.6366	19.8489	371.559	374.367	469.473	473.829	472.576	257.277	285.977	456.666	343.954	3.05608e-06	5.52825e-05
AT3G18090	367.474	485.744	442.203	349.521	384.456	389.791	318.842	407.179	449.908	420.617	345.57	278.073	370.579	302.652	247.457	327.49	339.819	286.447	3.08825e-06	5.58146e-05
AT1G30410	812.194	1071.47	1127.67	797.233	874.518	1184.28	1010.31	1246.32	1152.56	1136.39	1138.61	795.396	1017.29	946.844	735.497	966.326	1030.18	835.471	3.10721e-06	5.60571e-05
AT3G55440	10912.8	8566.07	11306.6	9362.3	10272.3	10477.5	9855.3	11311.8	11025.4	7584.79	8723.42	8453.23	8669	8446.35	7733.03	7957.78	8410.79	7861.03	3.10566e-06	5.60571e-05
AT4G39990	739.361	388.595	479.311	600.852	487.689	566.581	579.102	406.353	599.436	506.671	579.272	1036.45	581.081	572.333	733.533	669.971	569.224	910.338	3.13806e-06	5.65633e-05
AT2G01100	579.35	713.997	586.511	540.497	583.803	514.396	588.706	647.522	703.973	788.959	838.449	1007.56	717.948	860.613	886.72	811.806	747.173	922.274	3.14777e-06	5.66879e-05
AT1G11475	263.742	305.594	298.925	261.24	288.342	241.756	242.973	270.076	255.389	358.691	354.43	427.04	360.975	342.385	467.418	345.94	321.595	417.736	3.15808e-06	5.68229e-05
AT5G10960	2045.93	2289.13	2356.35	2209.73	2284.19	2181.12	2244.38	2215.95	2336.87	2810.82	2870.89	3118.39	2833.37	2633.41	3504.66	2570.34	2595.28	3245.32	3.16657e-06	5.69251e-05
AT3G12300	270.363	289.56	258.725	256.736	261.05	240.691	276.586	282.465	215.691	410.967	374.367	343.979	379.384	308.57	288.7	339.021	314.092	332.019	3.20179e-06	5.75072e-05
AT4G37470	1678.46	1426.11	1388.46	2180.9	1686.15	1298.24	2232.86	1777.38	1478.08	1549.77	1509.65	1789.42	1519.14	1522.56	1949.21	1706.64	1572.6	1903.14	3.2271e-06	5.79103e-05
AT5G17670	1042.83	905.465	1248.27	926.051	1048.95	1007.49	855.688	1065.44	958.038	739.901	884.968	663.582	754.765	802.281	617.66	886.76	725.734	504.538	3.23161e-06	5.794e-05
AT5G14060	5795.71	4732.94	5656.9	6667.93	6902.4	5377.2	6272.17	7784.31	5847.48	4252.82	3992.88	3375.69	4584.62	5027.57	3646.06	4648.28	5046.9	4046.07	3.25328e-06	5.82769e-05
AT1G58110	349.817	404.63	399.941	295.472	577.87	482.446	387.989	394.79	381.098	645	604.747	549.825	509.046	583.323	468.4	627.305	553.144	598.935	3.26504e-06	5.84359e-05
AT3G20440	199.738	320.685	240.171	194.579	287.155	230.041	158.461	241.169	248.772	219.557	250.316	159.801	238.515	249.392	158.097	242.158	295.868	179.03	3.2764e-06	5.85874e-05
AT5G62090	1141.04	1165.79	1131.79	1048.56	1016.91	1041.57	1169.73	1130.69	1176.38	933.722	889.399	973.254	902.037	874.985	1068.38	883.301	890.819	990.63	3.31673e-06	5.92562e-05
AT1G48420	1845.09	1869.41	2224.41	1923.27	2053.99	2226.92	2156.03	2267.98	2282.62	1936.61	1963.77	1539.33	2130.63	1859.03	1666.41	1691.65	1875.97	1497.34	3.32777e-06	5.94009e-05
AT4G36870	1009.72	1070.52	981.299	1610.68	1247.11	1080.98	1254.24	991.106	936.866	949.807	1072.15	1214.31	950.06	842.014	1084.1	994.002	1004.45	1256.46	3.33667e-06	5.95074e-05
AT2G34150	272.57	240.514	264.909	345.918	306.141	321.631	410.077	285.769	265.975	180.954	186.076	160.704	188.891	185.142	186.575	220.249	222.973	136.714	3.34316e-06	5.95706e-05
AT3G50740	1740.26	2142.93	1500.81	1663.83	2052.8	2148.11	3123.12	1953.3	2393.77	5778.46	4525.63	1626	5549.09	3817.81	2808.44	4517.98	4887.18	2432.63	3.35767e-06	5.97766e-05
AT5G42650	6585.83	10080.8	9661.46	7900.26	8666.86	7100.37	10247.1	9478.27	7169.41	5561.32	8071.05	4011.29	6035.72	5139.16	4609.37	5104.92	5155.17	4756.76	3.38633e-06	6.02338e-05
AT5G42800	1419.13	5500.7	3297.45	269.348	1043.01	1853.1	1809.33	3007.18	1852.56	72.3816	1304.75	23.4737	1165.36	295.043	11.7837	29.9815	32.1595	21.7006	3.40088e-06	6.04395e-05
AT2G40000	273.674	203.73	197.909	359.43	271.729	237.496	388.949	291.55	285.824	1324.58	560.443	421.623	790.783	937.544	3225.78	1101.24	1143.81	441.606	3.41029e-06	6.05305e-05
AT4G23130	215.187	166.945	307.171	236.017	535.153	681.602	362.059	327.065	664.275	980.368	580.38	286.198	531.457	653.491	384.933	782.978	618.535	451.372	3.41198e-06	6.05305e-05
AT1G77660	162.218	170.718	135.032	75.6695	154.257	121.41	184.391	105.718	166.73	447.962	266.93	172.441	276.134	218.112	326.015	363.237	302.3	250.641	3.4368e-06	6.09174e-05
AT1G13245	768.053	638.541	580.327	936.861	633.64	591.076	843.204	559.149	603.405	2037.14	1515.19	625.663	1625.59	1645.99	2269.34	1207.33	1262.8	951.569	3.47043e-06	6.14597e-05
AT1G73670	828.747	780.02	947.283	1035.05	1015.72	1040.51	1051.6	939.899	1009.65	825.15	774.209	842.343	734.756	743.948	808.163	836.022	802.917	832.216	3.49945e-06	6.19098e-05
AT4G20970	17.6564	39.6141	42.2618	29.7273	18.9855	23.4301	28.8111	23.1258	37.0512	10.4551	8.86076	5.417	9.60465	5.07238	0	9.22507	11.7918	10.8503	3.50196e-06	6.19098e-05
AT3G50570	11.0352	7.54554	16.4924	39.6364	26.105	19.17	15.3659	19.8221	10.5861	12.8678	25.4747	110.146	17.6085	23.6711	51.0625	34.594	36.4475	88.9723	3.58078e-06	6.32479e-05
AT5G07580	911.511	1068.64	1160.65	1053.97	932.661	1434.56	1454.96	769.759	1606.43	2784.28	1930.54	1378.63	1834.49	2290.18	2379.32	2322.41	2015.33	1859.74	3.61692e-06	6.38307e-05
AT2G38290	269.26	339.549	329.848	279.257	320.38	419.611	617.517	379.098	504.161	912.008	688.924	384.607	637.909	598.54	691.308	702.259	690.358	645.592	3.71525e-06	6.55088e-05
AT1G15960	331.057	501.778	566.927	304.48	497.182	453.691	182.47	331.194	406.24	474.501	408.703	282.587	356.973	325.477	299.501	284.824	339.819	249.556	3.71977e-06	6.55314e-05
AT2G45600	344.3	364.072	386.541	577.431	481.756	389.791	611.755	585.578	381.098	207.494	281.329	120.98	276.934	255.31	203.268	254.843	328.027	156.244	3.73719e-06	6.57811e-05
AT1G23950	574.936	576.291	478.28	698.142	560.071	582.556	642.487	692.122	621.931	722.207	606.962	854.08	677.928	634.892	872.973	695.34	574.584	858.257	3.77072e-06	6.62832e-05
AT5G24314	1591.28	1305.38	1797.67	1568.34	1771.58	1652.88	1171.65	1575.86	1523.07	1299.65	1233.86	980.477	1271.02	1235.12	930.909	1403.36	1374.28	864.767	3.77227e-06	6.62832e-05
AT4G09160	581.557	261.264	237.078	424.29	249.184	309.916	523.401	225.477	383.745	403.728	337.816	739.42	338.564	410.017	546.958	719.556	489.897	611.956	3.79615e-06	6.6645e-05
AT3G16290	2245.67	1925.06	2190.4	2343.05	2209.43	2261	1683.53	2224.21	2121.18	1745.2	1774.37	1365.99	1823.28	1776.18	1352.17	1658.21	1780.57	1382.33	3.85472e-06	6.76146e-05
AT2G04350	1871.58	1608.14	1847.15	2112.44	1866.51	1707.2	2245.34	2150.7	1843.3	1428.33	1658.07	1516.76	1656.8	1565.67	1632.04	1326.1	1490.06	1587.4	3.87773e-06	6.79593e-05
AT5G15330	64.0044	94.3192	98.9545	95.4878	80.6882	90.5252	92.1954	84.244	58.2233	229.208	143.987	121.882	139.267	178.379	221.926	145.295	191.885	147.564	3.8826e-06	6.79858e-05
AT2G18730	816.608	745.122	799.882	735.076	734.5	988.322	1008.39	730.94	968.625	1139.61	1157.44	1259.45	1049.31	1157.35	1366.9	1005.53	924.051	1553.76	3.89688e-06	6.80592e-05
AT2G35880	1526.17	1043.17	1152.41	1225.13	1132.01	1254.57	1103.46	1058.01	1202.84	1295.63	1329.11	1635.93	1104.53	1354.32	1488.67	1433.35	1413.95	1782.7	3.89107e-06	6.80592e-05
AT3G19930	851.921	662.121	910.175	802.638	702.462	905.252	929.637	640.915	906.431	1638.24	1189.56	1092.43	1348.65	1166.65	1079.19	1275.37	1416.09	1153.38	3.89591e-06	6.80592e-05
AT3G45290	93.7996	187.695	101.016	99.9919	109.166	130.995	174.787	151.97	154.821	238.859	198.26	156.19	272.132	211.349	186.575	200.645	188.669	181.2	3.91031e-06	6.82349e-05
AT5G65870	119.181	157.513	129.878	88.2811	124.592	74.5502	215.123	260.165	193.196	96.5088	131.804	99.3117	112.054	109.901	106.053	68.0349	116.846	71.6118	3.92108e-06	6.83638e-05
AT1G80850	244.982	218.821	284.494	121.612	159.003	235.366	204.559	275.858	213.044	170.499	148.418	116.465	223.308	173.306	115.873	146.448	127.566	111.758	3.93374e-06	6.85257e-05
AT1G54440	488.861	650.803	551.465	537.794	624.147	666.692	721.237	757.37	692.064	582.27	591.456	420.72	613.097	578.251	504.733	482.01	531.704	457.882	3.9608e-06	6.89376e-05
AT2G37870	256.018	203.73	596.819	313.488	262.237	315.241	140.214	730.115	303.026	6.43392	80.8544	3.61133	76.8372	40.579	5.89183	2.30627	49.3113	0	3.96952e-06	6.903e-05
AT4G31500	4883.09	4040.64	4494.18	4232.99	5584.1	6154.65	7782.83	4059.4	5589.44	14803.6	10424.7	6958.14	10333	9625.68	4706.59	12337.4	11631	7431.36	4.02683e-06	6.99666e-05
AT2G46430	665.425	871.51	1039.02	590.042	1563.93	1777.49	1436.71	1205.02	1808.89	1587.57	1322.47	365.647	1321.44	1419.42	608.822	1237.31	1320.69	543.599	4.10756e-06	7.13081e-05
AT5G09420	103.731	100.922	87.616	66.6613	74.7553	103.305	71.0673	77.6366	103.214	142.35	127.373	173.344	136.866	153.862	149.26	169.511	124.35	173.604	4.11388e-06	7.13567e-05
AT1G15400	536.313	629.109	436.018	536.893	484.129	483.511	675.139	580.623	502.838	746.335	685.601	630.178	701.139	714.36	752.19	736.853	671.062	820.281	4.12268e-06	7.1448e-05
AT5G15210	480.033	488.574	383.449	417.083	456.838	431.326	305.397	408.005	292.44	617.656	446.361	484.821	505.045	474.267	572.489	603.089	546.712	461.137	4.14256e-06	7.17311e-05
AT1G20823	258.225	201.843	272.125	257.637	196.974	187.44	280.428	156.925	224.954	153.61	261.392	587.744	204.899	288.28	416.356	262.915	191.885	595.68	4.15048e-06	7.17454e-05
AT5G59790	94.9031	170.718	144.309	82.8762	118.659	115.02	134.452	143.71	153.498	164.065	172.785	108.34	212.103	157.244	142.386	193.727	152.222	117.183	4.14958e-06	7.17454e-05
AT5G47060	321.126	478.199	355.618	231.513	329.872	358.906	284.269	453.431	428.735	197.039	291.298	229.32	286.539	210.504	199.34	140.682	160.798	220.261	4.15405e-06	7.17459e-05
AT4G06536	66.2115	89.6033	78.339	63.058	42.7173	43.6651	80.671	119.759	39.6977	24.9314	33.2279	41.5303	31.2151	22.8257	39.2789	29.9815	26.7996	27.1257	4.1676e-06	7.19186e-05
AT1G19020	28.6916	7.54554	6.18466	21.6199	9.49273	10.65	103.72	14.8666	42.3442	232.425	258.07	46.9473	156.876	71.8587	59.9003	144.142	139.358	45.5712	4.22114e-06	7.27406e-05
AT5G56160	115.87	152.797	142.247	136.926	106.793	117.15	145.016	136.277	121.74	76.4028	105.222	73.1295	100.849	102.293	56.9543	34.594	56.8152	62.9316	4.22242e-06	7.27406e-05
AT3G15940	963.377	879.999	1030.78	1093.61	1015.72	1004.3	1029.52	1074.52	1048.02	797.002	824.051	712.335	870.021	861.459	717.821	650.368	879.028	737.819	4.27597e-06	7.36005e-05
AT5G11650	246.086	265.98	190.694	294.571	179.175	169.335	318.842	232.084	224.954	323.304	255.854	361.133	314.552	273.063	312.267	336.715	203.677	414.481	4.29914e-06	7.39364e-05
AT1G76360	763.639	759.27	727.728	868.398	781.964	800.882	988.219	835.832	832.329	980.368	1094.3	968.74	904.438	932.472	1142.03	1019.37	933.699	1214.15	4.3342e-06	7.44761e-05
AT1G74730	4555.35	3472.83	4379.77	4873.48	4765.35	4451.71	3835.71	4839.9	4415.71	3174.33	2753.48	3105.75	3285.59	3575.18	2690.6	3709.63	3490.38	3053.27	4.39505e-06	7.54576e-05
AT2G45560	1759.02	1475.15	1803.86	2103.43	2076.54	1665.66	1571.16	2003.69	1631.58	1154.08	1077.69	1451.76	1298.23	1386.45	1324.68	1407.98	1254.22	1304.2	4.41719e-06	7.57735e-05
AT4G37670	143.458	150.911	154.616	134.223	156.63	133.125	171.906	126.366	138.942	226.796	254.747	200.429	199.296	180.915	161.043	232.933	230.477	259.322	4.44807e-06	7.62387e-05
AT4G25420	162.218	56.5915	65.9697	140.529	78.315	99.0452	181.51	72.6811	97.9211	62.7307	106.329	198.623	108.853	83.6942	115.873	106.088	106.126	173.604	4.45551e-06	7.63016e-05
AT5G18860	569.419	274.469	325.725	504.464	353.604	363.166	450.413	363.405	281.854	254.14	242.563	302.449	233.713	263.764	244.511	247.924	269.068	234.366	4.46151e-06	7.63398e-05
AT3G15450	582.661	221.65	278.309	812.547	323.939	276.901	335.169	295.68	252.742	1794.26	519.462	1116.8	436.211	1207.23	4441.46	2438.88	2314.42	1055.73	4.46681e-06	7.63659e-05
AT4G30470	363.059	310.31	310.264	414.381	353.604	338.671	496.511	361.754	334.784	276.658	325.633	647.331	316.953	385.501	564.634	396.678	309.804	749.754	4.48129e-06	7.65488e-05
AT1G05010	3676.94	3337.01	3883.96	4581.61	3569.27	4346.27	7102.89	3250.83	4835.18	10550.8	10451.3	5426.03	9220.46	7885.01	5398.88	9140.89	7645.4	6191.17	4.48957e-06	7.66255e-05
AT3G09440	3739.84	3114.42	3432.48	2743.02	3347.37	3706.21	4440.74	3340.85	4487.17	6026.97	8045.57	21997.5	5625.12	5044.48	10766.3	4816.64	3675.84	26955.3	4.54097e-06	7.74375e-05
AT4G09020	3289.61	5427.13	4906.49	4361.81	4052.21	4848.96	5690.18	5674.08	5851.44	2356.42	3496.68	2500.85	3599.34	2675.68	3773.72	1619	2353.01	3525.26	4.54833e-06	7.74978e-05
AT3G24503	2767.64	2228.76	2334.71	2766.44	2510.83	2818	3393.94	1897.14	2733.85	5784.9	4929.91	3494.87	5289.76	3672.4	3531.17	5628.45	3890.23	3905.02	4.57341e-06	7.78594e-05
AT1G07620	22.0705	60.3643	64.9389	45.0414	115.099	145.905	148.857	85.8958	182.61	230.013	162.816	95.7003	183.289	164.007	133.548	228.321	140.43	110.673	4.58674e-06	7.80209e-05
AT4G02075	61.7974	49.9892	74.2159	90.9836	45.0905	53.2501	92.1954	53.6849	37.0512	96.5088	116.297	167.024	71.2345	99.7567	227.817	126.845	97.5506	96.5675	4.59238e-06	7.80512e-05
AT1G29670	4597.28	2380.62	3727.29	5398.66	3831.5	3995.89	4493.57	2835.39	3469.58	3047.26	3163.29	5077.53	3019.06	3893.05	4249.97	4407.28	3176.29	5274.32	4.68909e-06	7.96281e-05
AT1G69790	52.9692	74.5122	70.0928	76.5704	49.8368	36.2101	53.7806	52.859	46.314	30.5611	35.443	23.4737	48.0233	11.8355	36.3329	9.22507	10.7198	13.0203	4.74651e-06	8.04819e-05
AT1G75410	922.546	806.43	787.513	999.919	931.474	880.757	972.853	748.285	775.429	1003.69	1026.74	1110.48	944.457	833.56	1005.54	928.273	965.858	1025.35	4.75528e-06	8.04819e-05
AT2G35490	3062.28	2593.78	3171.7	3345.67	3308.22	3487.88	3143.29	3662.14	3244.63	2738.44	2570.73	1987.14	2803.76	2708.65	2173.1	2601.47	2702.47	1985.6	4.74963e-06	8.04819e-05
AT3G58650	171.046	149.024	207.186	100.893	144.764	152.295	82.5917	120.585	127.033	113.398	108.544	46.9473	112.855	106.52	78.5577	80.7194	125.422	39.061	4.75503e-06	8.04819e-05
AT3G24530	397.269	309.367	305.11	345.017	339.365	282.226	358.218	325.413	288.47	335.368	302.373	481.21	307.349	301.806	430.103	330.949	356.971	527.324	4.77329e-06	8.07193e-05
AT1G75100	934.685	1077.13	1204.98	1262.06	1039.45	1063.94	1095.78	918.425	1091.69	1712.23	1344.62	1580.86	1302.23	1295.15	1386.54	1616.69	1469.69	1407.28	4.78934e-06	8.0923e-05
AT1G78300	2564.59	1647.76	2017.23	2294.41	2116.88	2070.36	2186.76	1870.71	2060.31	2644.34	2226.27	3228.53	2223.48	2729.78	2852.63	3288.74	2602.78	3040.25	4.80171e-06	8.09969e-05
AT3G15540	302.366	45.2732	67.0004	240.521	115.099	102.24	149.818	57.8145	100.568	155.218	97.4684	268.141	118.457	156.398	168.899	202.952	130.782	301.638	4.79861e-06	8.09969e-05
AT4G24450	595.903	2254.23	1361.65	749.489	1123.7	1409	1032.4	1575.86	1696.42	2286.45	2068.99	888.388	2018.58	1901.3	1517.15	952.489	1793.43	910.338	4.82573e-06	8.13342e-05
AT2G19170	527.485	574.404	646.297	550.406	601.602	530.371	461.937	424.524	554.445	391.665	368.829	434.263	362.576	453.132	363.329	411.669	349.467	368.909	4.90757e-06	8.26447e-05
AT1G79720	178.771	156.57	228.832	191.876	163.75	270.511	174.787	144.536	267.298	299.981	296.835	340.368	243.318	263.764	258.258	304.427	290.508	296.213	4.91346e-06	8.26751e-05
AT1G09795	2096.7	1706.24	2239.88	2134.96	1969.74	2116.16	1807.41	2177.13	2224.4	1638.24	1642.56	1381.33	1589.57	1577.51	1614.36	1597.09	1650.86	1636.22	4.98266e-06	8.37699e-05
AT1G48120	295.744	277.299	300.987	316.191	287.155	252.406	307.318	315.502	300.379	442.332	307.911	940.752	368.178	274.754	645.155	298.662	267.996	914.678	4.99179e-06	8.38537e-05
AT4G40030	4435.06	5083.81	4277.72	4225.78	4525.66	4474.08	4508.93	4573.95	4222.51	3648.03	3784.65	3878.57	3761.02	3778.92	3929.85	3859.54	3651.18	3875.72	5.06453e-06	8.50051e-05
AT1G80780	1027.38	1289.34	1197.76	1020.64	1139.13	1103.34	1031.44	1106.73	999.059	1426.72	1387.82	1459.88	1414.28	1270.63	1624.18	1410.28	1290.67	1317.22	5.07065e-06	8.50373e-05
AT1G79820	416.029	450.846	438.08	375.645	390.389	429.196	411.998	460.038	488.282	316.066	317.88	340.368	360.174	347.458	333.87	216.789	345.179	296.213	5.11738e-06	8.57501e-05
AT1G17550	1672.94	2277.81	1573.99	1974.61	1983.98	1656.08	2202.13	2180.43	1705.68	1202.34	1587.18	1430.09	1484.72	1263.87	1678.19	1181.96	1181.33	1412.71	5.12288e-06	8.57712e-05
AT4G21790	1312.09	1145.98	1070.98	1301.7	1294.57	1094.82	1457.84	1358.64	1058.61	1306.89	1298.1	1565.51	1484.72	1265.56	1490.63	1339.94	1387.15	1606.93	5.14063e-06	8.59847e-05
AT5G57070	397.269	245.23	253.571	299.075	201.721	230.041	302.516	264.295	227.6	223.579	300.158	379.19	273.733	235.02	315.213	347.093	262.636	509.963	5.14413e-06	8.59847e-05
AT3G04140	656.597	485.744	492.711	599.951	593.296	496.291	626.16	566.582	537.243	541.253	584.81	845.955	570.676	606.149	759.064	600.783	582.088	759.519	5.17367e-06	8.64071e-05
AT1G63610	1120.08	948.852	1056.55	1046.76	1057.25	1058.61	993.021	1039.84	1197.55	801.827	779.747	704.21	934.052	867.376	692.29	876.382	916.547	679.227	5.23113e-06	8.72948e-05
AT4G35300	2401.27	2663.58	2350.17	2518.71	2265.2	2170.47	2720.72	3245.87	2279.97	1261.85	1560.6	2149.65	1808.08	1486.21	2278.17	1190.03	1547.95	2216.71	5.26359e-06	8.7764e-05
AT1G18670	403.89	407.459	467.972	485.546	351.231	441.976	411.038	393.139	370.512	275.05	353.323	261.822	270.531	302.652	246.475	330.949	352.683	243.046	5.29744e-06	8.82557e-05
AT5G23350	13.2423	19.807	9.27698	34.2315	16.6123	9.58502	7.68295	11.5629	13.2326	17.6933	31.0127	83.0607	27.2132	16.9079	39.2789	53.0442	37.5195	61.8466	5.37305e-06	8.94418e-05
AT4G00335	247.189	214.105	199.971	192.777	217.146	181.05	238.171	208.132	209.075	316.066	327.848	248.279	314.552	278.981	348.6	274.446	289.436	312.488	5.44062e-06	9.04922e-05
AT2G26760	154.493	167.888	140.186	100.893	173.242	146.97	96.9972	111.499	132.326	102.138	88.6076	69.5182	107.252	120.892	59.9003	80.7194	107.198	44.4861	5.46359e-06	9.07997e-05
AT3G45970	151.183	16.9775	68.0312	190.075	18.9855	59.6401	23.0488	9.08514	51.607	48.2544	18.8291	333.145	16.0078	57.4869	162.025	168.358	28.9436	322.253	5.50637e-06	9.13754e-05
AT3G51280	198.634	177.32	160.801	121.612	212.4	238.561	67.2258	161.055	158.791	118.223	95.2532	74.0323	113.655	157.244	63.8281	129.151	132.926	73.7819	5.50726e-06	9.13754e-05
AT4G39980	1831.85	1749.62	2050.21	1957.5	1962.62	2101.25	2476.79	2108.58	2118.54	3735.69	2845.41	2541.48	2953.43	2444.89	1921.72	3361.39	2813.96	2716.91	5.51437e-06	9.14184e-05
AT4G18250	46.348	61.3075	68.0312	16.2149	49.8368	135.255	145.976	52.859	214.368	695.667	297.943	65.004	468.227	306.879	103.107	435.885	443.802	110.673	5.52671e-06	9.15481e-05
AT4G15236	22.0705	24.523	12.3693	16.2149	16.6123	6.39001	13.4452	8.25921	15.8791	306.415	219.304	20.7652	149.672	23.6711	3.92789	133.764	84.6868	10.8503	5.53898e-06	9.16762e-05
AT5G63160	308.987	227.309	250.479	327.901	291.902	241.756	333.248	300.635	226.277	139.938	142.88	309.672	120.058	185.987	273.97	182.195	162.942	217.006	5.59219e-06	9.24814e-05
AT3G16340	637.837	421.607	417.464	294.571	389.202	322.696	365.9	382.402	284.5	254.14	312.342	316.894	200.097	231.639	248.439	254.843	216.541	284.277	5.61486e-06	9.27804e-05
AT1G06550	845.3	1201.63	875.129	703.547	734.5	822.182	717.395	878.78	902.462	753.573	814.082	650.04	793.984	817.498	606.858	644.602	659.271	589.17	5.63264e-06	9.29982e-05
AT5G62360	84.9714	33.0117	39.1695	81.0745	35.5977	44.7301	72.988	41.2961	87.335	222.774	39.8734	212.166	102.45	161.471	149.26	373.615	295.868	182.285	5.67844e-06	9.36781e-05
AT5G05460	155.597	256.548	286.556	181.066	300.208	452.626	308.278	275.858	411.533	434.289	409.81	101.117	333.762	366.902	183.629	315.959	332.315	144.309	5.71991e-06	9.42087e-05
AT5G10290	376.302	463.107	526.726	319.794	393.948	634.741	460.977	488.945	534.596	708.535	717.722	603.995	642.711	608.685	508.661	584.639	690.358	658.612	5.71582e-06	9.42087e-05
AT5G03260	307.883	197.127	250.479	236.017	272.916	281.161	214.162	218.043	264.652	119.832	235.918	209.457	132.064	202.05	180.683	118.773	167.23	162.754	5.73121e-06	9.4318e-05
AT2G21280	1544.93	1232.75	1596.67	1322.42	1455.95	1562.36	1284.01	1424.71	1409.27	1113.07	1131.96	877.554	1229.4	1140.44	823.874	1283.44	1172.75	877.788	5.74421e-06	9.44551e-05
AT3G47790	64.0044	11.3183	8.24621	9.00828	9.49273	0	9.60369	8.25921	5.29303	1.60848	0	3.61133	0	0	1.96394	0	2.14397	1.08503	5.75633e-06	9.45776e-05
AT2G04795	39.7269	39.6141	45.3541	43.2397	36.7843	39.4051	23.0488	44.5998	31.7582	88.4664	64.2405	98.4088	77.6376	52.4146	87.3955	62.2692	75.0389	75.9519	5.77272e-06	9.477e-05
AT1G76010	2438.79	2301.39	2384.18	2371.88	2322.16	2128.94	2201.17	2358.83	2035.17	2434.43	2451.11	3708.84	2505.21	2733.17	3143.29	2939.34	2719.63	3484.02	5.81855e-06	9.5445e-05
AT4G16990	5128.08	4989.49	6070.24	6177.88	6578.46	7694.64	5863.05	5278.46	7266.01	9790.01	7262.5	7256.07	6865.72	8282.34	7011.28	9311.56	8575.88	7283.79	5.82477e-06	9.54697e-05
AT1G64380	59.5903	60.3643	94.8314	61.2563	110.353	105.435	57.6221	54.5108	60.8698	28.9526	9.96836	40.6275	17.6085	35.5066	15.7115	32.2878	31.0876	10.8503	5.84383e-06	9.57045e-05
AT5G54585	134.63	99.0352	39.1695	218.901	168.496	59.6401	193.034	194.917	34.4047	135.112	110.76	241.959	145.671	108.211	212.106	337.868	185.453	185.54	5.84949e-06	9.57198e-05
AT2G38400	372.991	303.708	204.094	514.373	289.528	239.626	443.69	340.28	271.268	512.301	250.316	548.02	337.764	343.231	368.239	412.822	466.313	608.701	5.85909e-06	9.57994e-05
AT1G20696	2449.82	3139.89	2803.71	2955.62	2749.33	2428.21	2766.82	2845.3	2392.45	2130.43	1932.75	2002.48	2189.06	2046.7	2401.9	1928.04	2210.43	2247.09	5.87165e-06	9.59273e-05
AT3G13175	83.8678	166.002	87.616	68.4629	109.166	130.995	54.741	90.8514	88.6583	53.8841	50.9494	45.1417	76.0368	90.4574	72.6659	56.5036	36.4475	42.3161	5.89191e-06	9.61288e-05
AT5G24300	4213.26	3707.69	5006.48	4355.5	4153.07	4232.32	3769.45	4429.42	4189.43	3155.84	3445.73	3391.04	3199.95	3532.91	3487.96	3416.74	3518.25	3530.68	5.89348e-06	9.61288e-05
AT5G12930	41.9339	96.2056	61.8466	62.1571	84.248	107.565	49.9392	79.2885	64.8396	105.355	111.867	25.2793	100.849	90.4574	28.4772	124.538	98.6226	39.061	5.89871e-06	9.61367e-05
AT4G21850	55.1762	9.43192	14.4309	16.2149	14.2391	17.04	56.6618	16.5184	26.4652	139.133	62.0253	81.255	39.219	85.385	68.738	163.745	76.1109	93.3124	5.92953e-06	9.65611e-05
AT2G23000	856.335	975.261	959.652	695.439	751.112	566.581	681.862	915.121	576.94	216.341	572.627	510.101	565.874	356.757	415.374	287.13	266.924	404.715	6.01225e-06	9.78295e-05
AT3G28050	1680.67	1768.49	1565.75	2038.57	1878.37	1768.97	2278.95	2015.25	1832.71	1841.71	1866.3	2500.85	2113.82	1945.26	3101.07	1855.39	2048.56	2895.94	6.07875e-06	9.88321e-05
AT5G44750	1071.52	1375.17	1026.65	952.175	1029.96	1023.47	966.131	1119.12	878.643	1620.54	1591.61	1315.43	1434.29	1286.69	1566.24	1211.94	1375.36	1515.78	6.11398e-06	9.93252e-05
AT2G27150	670.943	660.235	681.343	817.051	647.879	650.716	896.024	819.314	762.196	600.767	572.627	689.765	610.696	464.968	575.435	604.242	594.952	697.673	6.17005e-06	0.000100156
AT3G46290	1340.78	1092.22	1280.22	1507.99	1331.36	1333.38	1336.83	1229.8	1384.13	883.055	892.722	1250.42	917.244	971.36	986.881	1206.18	942.275	1290.1	6.21453e-06	0.000100797
AT1G44110	208.566	169.775	255.632	146.835	174.429	195.96	86.4332	156.099	177.317	112.594	178.323	95.7003	162.479	215.576	85.4315	117.62	192.957	64.0166	6.28251e-06	0.000101818
AT2G27680	3996.96	3342.67	4636.43	4525.76	4538.71	4590.16	3609.07	4565.69	4423.65	3352.07	3291.77	2250.76	3666.58	3904.88	2193.72	3512.45	3740.15	2314.36	6.34116e-06	0.000102686
AT1G02930	1041.73	4163.25	4110.73	336.009	1306.44	3291.92	2380.75	2869.25	3354.46	7386.14	7485.13	1159.24	6636.81	2725.56	931.891	5249.07	3777.67	1667.69	6.38115e-06	0.000103249
AT2G21960	2162.91	1778.86	2390.37	2198.92	2379.12	2265.26	1881.36	2272.94	2117.21	1756.46	1782.12	1555.58	1779.26	1801.54	1388.51	1885.37	1782.71	1404.03	6.3861e-06	0.000103249
AT4G17860	4.4141	0.943192	0	5.40497	4.74637	0	5.76221	0	2.64652	6.43392	6.64557	54.17	3.20155	3.38158	19.6394	57.6567	7.50389	17.3604	6.41309e-06	0.000103602
AT1G33480	182.081	142.422	196.878	163.951	150.697	139.515	180.549	153.621	150.851	91.6833	90.8228	111.951	107.252	69.3225	90.3414	73.8006	124.35	72.6969	6.45052e-06	0.000104124
AT2G27402	275.881	256.548	272.125	175.661	364.284	271.576	97.9576	239.517	353.31	484.957	414.241	808.036	353.771	644.192	666.759	719.556	691.43	670.547	6.50703e-06	0.000104952
AT4G10470	326.643	333.89	320.571	286.463	294.275	307.786	242.973	333.672	316.259	211.515	260.285	204.04	290.541	277.29	222.908	234.086	219.757	200.73	6.57616e-06	0.000105983
AT2G16940	1730.33	2119.35	2020.32	1630.5	1830.91	1723.17	1657.6	1926.87	1802.28	2431.22	2118.83	2314.86	2043.39	2117.72	2183.9	2262.45	2171.84	2224.31	6.58919e-06	0.000106108
AT3G55620	742.672	862.078	816.375	761.2	827.054	900.992	789.423	801.144	866.734	1111.46	976.899	1531.21	945.258	1010.25	1190.15	1233.85	1060.19	1501.68	6.62824e-06	0.000106652
AT1G34315	79.4537	149.024	92.7698	75.6695	77.1285	126.735	60.5032	108.196	145.558	188.996	191.614	92.9918	125.661	209.658	122.746	193.727	165.086	100.908	6.67084e-06	0.000107253
AT4G26990	109.249	49.046	65.9697	114.405	55.7698	61.7701	100.839	52.859	91.3048	137.525	90.8228	167.927	93.6453	89.612	139.44	113.007	62.1751	156.244	6.68303e-06	0.000107363
AT2G38230	1655.29	1555.32	1823.44	1659.32	1536.64	1511.24	1487.61	1725.35	1319.29	1741.18	1970.41	4337.21	1808.08	1752.51	3409.4	1786.2	1791.29	3634.84	6.69409e-06	0.000107456
AT1G78820	1640.94	924.329	1147.25	1868.32	1306.44	1358.94	1560.6	1382.59	1196.22	777.7	725.475	1106.87	639.51	935.853	1275.58	1259.22	1247.79	1042.71	6.72125e-06	0.000107806
AT1G31850	1583.56	1300.66	1221.47	1418.8	1448.83	1317.41	1284.97	1300.83	1382.8	772.07	986.867	1272.99	918.845	946.844	1368.87	871.769	829.716	1303.12	6.73207e-06	0.000107894
AT2G39510	123.595	79.2282	36.0772	23.4215	9.49273	23.4301	16.3263	33.0369	9.2628	8.0424	5.53798	16.251	8.00388	8.45396	3.92789	16.1439	15.0078	32.5508	6.83986e-06	0.000109535
AT2G40070	824.333	817.748	846.267	1050.37	875.705	873.302	779.819	896.951	767.489	682.8	712.184	635.595	747.562	662.79	630.426	680.349	646.407	563.129	6.97594e-06	0.000111626
AT1G73830	348.714	85.8305	115.447	223.405	75.9419	76.6802	211.281	47.9034	55.5768	256.552	186.076	195.012	155.275	296.734	348.6	184.501	270.14	249.556	7.01428e-06	0.000112151
AT1G67195	436.996	394.254	292.74	361.232	325.126	266.251	450.413	371.665	293.763	427.051	516.139	518.226	520.252	415.935	504.733	327.49	308.732	522.983	7.09117e-06	0.000113291
AT1G50450	1013.04	948.852	1060.67	1040.46	1000.3	1009.62	772.136	1076.18	1093.01	753.573	878.323	731.295	801.988	826.797	633.372	866.004	767.541	659.697	7.13095e-06	0.000113682
AT2G48100	572.729	709.281	597.85	572.927	571.937	574.036	557.014	664.867	570.324	775.287	807.437	839.635	804.389	742.258	771.83	712.637	700.006	866.937	7.13701e-06	0.000113682
AT3G01960	72.8326	121.672	110.293	77.4712	141.204	113.955	72.988	141.233	154.821	158.435	193.829	134.522	164.079	137.8	94.2693	80.7194	138.286	78.122	7.14122e-06	0.000113682
AT3G22960	5494.45	4179.29	4512.74	5113.1	4926.73	4711.57	4971.83	4886.98	4598.32	4752.25	4483.54	8910.06	4350.91	5168.75	7277.39	5539.66	5032.97	9164.15	7.14372e-06	0.000113682
AT5G05740	2104.42	1767.54	2005.89	1801.66	2118.07	1856.3	1508.74	1971.47	1791.69	1455.67	1320.25	1419.25	1514.33	1565.67	1216.66	1557.88	1629.42	1220.66	7.14083e-06	0.000113682
AT3G24515	97.1101	116.956	140.186	90.0828	98.4871	89.4602	71.0673	99.1106	78.0722	69.1646	53.1646	38.8218	70.4341	67.6317	68.738	80.7194	87.9028	77.037	7.17698e-06	0.000114121
AT3G55560	263.742	423.493	340.156	300.877	299.021	272.641	343.812	308.895	332.138	760.007	530.538	325.02	507.446	442.142	525.355	605.395	569.224	381.93	7.20627e-06	0.000114497
AT5G56100	90.489	70.7394	68.0312	156.744	87.8078	51.1201	69.1465	64.4219	37.0512	125.461	37.6582	133.619	92.845	82.8488	206.214	160.286	157.582	148.649	7.32178e-06	0.000116241
AT4G01130	285.813	281.071	242.232	456.72	342.925	328.021	247.775	416.264	333.461	193.018	108.544	156.19	179.287	237.556	140.422	179.889	244.413	162.754	7.33422e-06	0.000116347
AT3G26680	116.974	130.161	93.8006	106.298	87.8078	80.9402	81.6313	80.9403	107.184	245.293	330.063	129.105	182.488	191.059	111.945	219.095	167.23	120.438	7.34592e-06	0.000116442
AT5G57930	2603.21	2509.84	2705.79	2692.57	2544.05	2684.87	2393.24	2866.77	2414.95	2173.86	2076.74	2146.94	2021.78	2175.2	2010.1	2343.17	2197.57	2289.41	7.39016e-06	0.000117051
AT1G67800	340.989	384.823	257.694	242.323	306.141	353.581	431.206	407.179	408.887	550.904	515.032	412.595	540.262	415.935	456.617	523.523	487.753	434.011	7.42341e-06	0.000117486
AT5G18480	646.665	687.587	640.112	724.266	687.037	734.852	843.204	611.182	858.794	1130.76	1016.77	913.667	965.267	820.034	993.755	1037.82	977.65	939.634	7.56969e-06	0.000119708
AT1G53430	937.996	1040.34	1253.42	917.944	1033.52	1548.51	1045.84	801.144	1548.21	2253.48	1633.7	1211.6	1607.18	1607.1	1201.93	2192.11	1843.81	1395.35	7.58244e-06	0.000119816
AT5G54145	196.427	188.638	206.155	315.29	238.505	223.651	293.873	208.132	191.872	338.585	233.703	304.255	284.138	323.787	488.04	318.265	250.844	358.059	7.61656e-06	0.000120261
AT4G25450	1232.64	1213.89	1214.25	1231.43	1266.09	1220.49	1257.12	1456.93	1352.37	937.744	987.975	1118.61	1042.9	974.742	1008.48	1051.66	1043.04	1145.79	7.64664e-06	0.000120642
AT2G34070	227.326	182.979	152.555	179.265	166.123	170.4	239.132	128.844	117.77	168.89	228.165	337.66	179.287	252.773	290.664	170.664	149.006	392.78	7.65817e-06	0.000120729
AT2G38940	64.0044	103.751	41.231	50.4464	52.21	59.6401	207.44	93.3291	63.5164	181.758	106.329	211.263	155.275	91.3028	155.151	243.311	230.477	158.414	7.67886e-06	0.000120962
AT1G07890	10082.9	5341.3	6485.64	9131.69	9539.01	9262.33	14107.8	16550.6	11511	10151.9	8427.69	18008.8	9335.72	10059.4	14169.8	13419	12492.9	21949	7.68761e-06	0.000121005
AT3G49900	169.943	164.115	122.662	163.951	169.683	178.92	155.58	174.269	149.528	123.049	110.76	90.2833	116.857	96.3751	78.5577	137.223	98.6226	125.863	7.74154e-06	0.000121759
AT5G01090	683.082	618.734	670.004	774.712	636.013	663.497	710.673	664.041	558.415	769.657	764.241	878.457	753.165	731.268	864.135	815.266	762.181	814.856	7.79193e-06	0.000122457
AT3G14280	205.256	81.1146	76.2774	158.546	73.5687	68.1602	205.519	147.014	111.154	73.1858	28.7975	93.8947	104.851	76.0856	87.3955	78.4131	81.4708	95.4825	7.81328e-06	0.000122697
AT3G48850	0	0	4.1231	1.80166	4.74637	0	38.4147	4.95553	10.5861	75.5985	151.741	9.02833	73.6357	21.9803	7.85577	46.1254	49.3113	16.2754	7.83333e-06	0.000122916
AT2G43520	19.8634	33.9549	20.6155	14.4132	26.105	26.6251	24.9696	16.5184	23.8186	61.9265	37.6582	148.967	40.8198	59.1777	82.4856	26.5221	65.3911	158.414	7.85451e-06	0.000123153
AT5G07020	4404.17	3416.24	4692.09	4584.31	4439.04	4770.15	3724.31	4777.96	4403.8	3180.77	3259.65	2799.69	3615.35	3599.7	2479.48	3672.73	3712.28	2538.97	7.89235e-06	0.000123651
AT2G18150	206.359	92.4329	53.6003	72.0662	75.9419	53.2501	91.235	73.507	15.8791	20.9102	24.3671	25.2793	24.0116	23.6711	9.81971	66.8818	15.0078	29.2958	7.95279e-06	0.000124501
AT1G01600	206.359	99.9784	152.555	201.785	132.898	162.945	493.63	135.451	195.842	221.97	305.696	418.915	291.341	216.421	281.826	260.608	180.093	295.128	8.00012e-06	0.000125146
AT3G53980	1086.97	896.033	1024.59	505.364	474.637	527.176	308.278	960.547	464.463	152.806	321.203	137.231	234.514	312.797	117.837	20.7564	248.7	86.8022	8.04663e-06	0.000125672
AT5G59080	300.159	196.184	135.032	357.629	262.237	206.61	353.416	195.743	195.842	620.069	246.994	460.445	429.008	493.711	648.101	667.665	664.631	327.678	8.05237e-06	0.000125672
AT5G65310	4388.72	3872.75	3231.48	4667.19	3231.09	3311.09	3817.47	3075.73	3284.33	2298.52	2904.11	2161.38	2763.74	2665.53	2237.91	2435.42	2563.12	2218.88	8.04593e-06	0.000125672
AT4G35090	8213.53	6629.7	8789.43	8758.75	8156.63	8068.46	7213.33	8915	7539.92	7766.54	10562	28622.5	7460.41	7825.83	21401.1	10004.6	7543.56	24033.4	8.06244e-06	0.000125732
AT3G15210	627.905	1232.75	851.421	682.828	1025.22	841.352	1349.32	1321.47	983.18	1996.12	1846.36	771.922	1778.46	1354.32	1373.78	1233.85	1282.09	1085.03	8.0859e-06	0.000126001
AT1G30260	165.529	140.536	191.724	210.794	224.266	170.4	254.498	280.813	181.286	128.678	139.557	90.2833	137.667	142.027	103.107	139.529	120.062	75.9519	8.12752e-06	0.000126552
AT5G61010	529.692	921.499	839.052	688.233	875.705	1201.32	1114.03	905.21	1275.62	1493.47	1458.7	878.457	1539.15	1182.71	1009.47	1269.6	1149.17	1017.76	8.15937e-06	0.00012695
AT2G24230	324.436	273.526	343.248	288.265	355.977	382.336	240.092	289.898	386.391	238.055	217.089	217.583	260.926	228.257	195.412	253.689	209.037	177.945	8.19232e-06	0.000127365
AT5G18650	793.434	586.666	662.789	985.506	615.841	575.101	951.725	582.275	612.668	1092.16	904.905	939.849	902.037	995.876	1304.06	1124.31	1208.13	968.93	8.20942e-06	0.000127533
AT2G37220	16155.6	12853.8	15883.2	15857.3	15959.7	14944.1	12421.4	17349.3	14655.1	9473.14	9658.23	12377.8	10694.8	11521.1	10827.2	11824.2	11636.4	10993.5	8.22184e-06	0.000127567
AT5G41080	52.9692	17.9207	12.3693	14.4132	21.3586	14.91	61.4636	13.2147	21.1721	32.9738	35.443	65.9068	22.4109	32.125	104.089	65.7286	47.1673	68.3568	8.22423e-06	0.000127567
AT2G16530	154.493	150.911	169.047	126.116	170.869	201.285	184.391	209.784	228.924	147.98	101.899	107.437	134.465	130.191	100.161	138.376	126.494	110.673	8.28209e-06	0.000128366
AT5G05730	1006.41	735.69	896.775	875.605	911.302	1017.08	1455.92	859.784	1032.14	3091.5	2236.23	1239.59	2369.15	1731.37	931.891	2700.64	2431.26	1177.26	8.30218e-06	0.000128579
AT3G24520	16.5529	12.2615	6.18466	6.3058	7.11955	7.45502	10.5641	14.8666	3.96977	0	0	0	3.20155	4.22698	5.89183	3.4594	2.14397	1.08503	8.35197e-06	0.000129251
AT4G18070	832.057	750.781	833.898	912.539	860.279	816.857	886.42	722.681	807.187	875.013	834.019	1195.35	794.785	915.564	1150.87	1071.26	869.38	1461.53	8.36259e-06	0.000129317
AT3G50280	75.0396	78.285	59.785	19.8182	42.7173	75.6152	126.769	71.0292	66.1629	25.7357	19.9367	4.51417	48.0233	16.9079	11.7837	16.1439	12.8638	17.3604	8.38317e-06	0.000129536
AT4G37530	163.322	72.6258	55.6619	78.372	96.1139	93.7202	132.531	57.8145	112.477	208.298	152.848	223.903	142.469	201.204	217.998	236.392	142.574	223.516	8.3951e-06	0.000129621
AT1G74600	84.9714	122.615	89.6775	94.5869	109.166	137.385	75.8691	127.192	131.002	82.8367	56.4873	38.8218	68.8333	87.0758	45.1707	89.9445	64.3191	70.5268	8.44981e-06	0.000130367
AT1G17710	0	1.88638	0	0	2.37318	0	17.2866	0	5.29303	28.9526	6.64557	37.919	14.407	16.9079	21.6034	23.0627	6.43191	19.5305	8.53853e-06	0.000131612
AT1G79920	3023.66	2602.27	2978.94	2860.13	2913.08	3163.06	3059.73	2858.51	3075.25	3508.9	3535.44	7063.77	3541.71	3598.01	5425.39	3309.49	2952.25	8196.3	8.54351e-06	0.000131612
AT3G13330	2159.6	2021.26	2196.58	2029.57	2128.75	2410.1	2494.08	2267.15	2634.61	2011.4	2062.34	1397.59	1851.3	1790.55	1565.26	1839.25	1903.84	1670.94	8.6545e-06	0.00013322
AT2G47930	389.544	260.321	318.51	382.852	319.193	377.011	244.894	227.954	330.814	350.649	332.279	545.311	396.192	490.33	559.724	503.92	366.619	555.534	8.73144e-06	0.000134302
AT1G75090	55.1762	73.569	49.4772	56.7522	70.0089	55.3801	29.7714	64.4219	58.2233	25.7357	42.0886	28.8907	37.6182	30.4343	30.4411	26.5221	15.0078	18.4455	8.78042e-06	0.000134889
AT2G14910	2797.43	3265.33	3033.57	3778.07	3131.42	2939.41	3300.79	3106.29	2792.07	4568.08	4100.32	3649.25	3885.08	3827.11	3731.49	4348.47	4368.34	3823.64	8.78288e-06	0.000134889
AT3G60530	773.57	626.28	612.281	851.282	723.821	541.021	791.344	559.975	620.608	607.201	688.924	760.186	685.132	921.482	1278.53	615.774	702.15	852.832	8.88292e-06	0.000136322
AT1G56190	4862.13	4101	5879.55	4636.56	4976.56	6018.33	4509.89	4989.39	5465.05	4479.62	5018.51	3551.75	4583.82	4858.49	3343.61	4755.52	4717.81	3451.47	8.90097e-06	0.000136495
AT3G27870	633.423	930.931	657.635	751.29	672.797	654.976	767.335	699.555	625.901	474.501	584.81	202.235	515.45	491.175	288.7	362.084	450.234	248.471	9.06207e-06	0.00013886
AT1G53730	902.683	558.37	834.928	856.687	658.558	908.447	656.892	516.201	721.175	862.145	785.285	1502.31	617.899	911.337	1146.94	1328.41	866.164	1388.84	9.15047e-06	0.000140109
AT5G23130	123.595	92.4329	98.9545	109	75.9419	70.2902	84.5124	62.77	64.8396	112.594	93.038	151.676	74.436	104.829	149.26	125.692	126.494	132.373	9.16349e-06	0.000140202
AT1G54410	23314.2	24713.5	25270.5	28318.4	25769.2	23635.6	26401.5	27404.9	24312.2	21117.7	20343.2	20071.8	20248.2	20628.5	20779.5	17943.9	22606	18615.8	9.34736e-06	0.000142907
AT4G21800	445.824	470.653	477.249	459.422	475.823	551.671	591.587	495.553	559.738	634.545	676.741	746.643	645.112	628.129	664.795	555.811	534.92	721.544	9.41007e-06	0.000143757
AT4G35860	783.502	716.826	682.374	808.943	759.419	742.307	843.204	774.714	754.257	645	605.855	644.623	629.105	590.086	683.452	725.321	581.016	651.017	9.63776e-06	0.000147125
AT3G23890	737.154	662.121	739.066	526.083	670.424	789.167	258.339	638.437	648.396	458.417	529.43	362.939	538.661	666.172	327.978	480.857	562.792	196.39	9.69175e-06	0.000147838
AT2G44060	4532.17	3890.67	4316.89	4260.02	4302.58	3966.07	4463.79	4782.91	4114.01	3127.69	3617.41	3330.55	3735.41	3685.93	3429.04	3604.7	3429.28	3525.26	9.78827e-06	0.000149197
AT3G48740	1288.92	2605.1	2317.18	1863.81	2170.28	2556.01	1730.58	2342.31	2388.48	4009.94	3287.34	3772.04	3464.08	2943.67	3631.33	2694.87	3307.07	3586.02	9.82332e-06	0.000149619
AT4G32140	313.401	232.025	222.648	338.711	246.811	260.926	324.605	226.302	264.652	288.722	297.943	340.368	300.145	245.165	317.177	322.878	278.716	448.117	9.83638e-06	0.000149705
AT1G12240	2894.54	1546.84	1924.46	3287.12	2114.51	2069.3	2703.44	2142.44	1877.7	2218.9	2010.29	2935.11	2108.22	2099.12	2968.5	2852.85	2629.58	2665.91	9.84401e-06	0.000149709
AT3G04420	11.0352	15.0911	6.18466	14.4132	7.11955	2.13	13.4452	13.2147	2.64652	36.995	15.5063	37.0162	40.0194	23.6711	19.6394	50.7379	36.4475	19.5305	9.88177e-06	0.00015017
AT3G51270	647.769	556.484	628.773	566.621	600.415	554.866	522.441	602.923	625.901	735.879	798.576	1147.5	702.74	683.08	943.675	751.843	690.358	1170.75	9.96771e-06	0.000151358
AT5G25930	112.559	111.297	131.939	112.603	109.166	280.096	241.053	141.233	202.458	707.731	583.703	142.648	462.624	277.29	148.278	503.92	401.994	138.884	9.97489e-06	0.000151358
AT1G03780	222.912	199.014	230.894	149.537	252.744	249.211	95.0765	167.662	174.67	172.107	139.557	91.1862	189.692	219.803	76.5938	114.16	169.374	52.0813	1.00451e-05	0.000152309
AT2G42490	1771.16	1895.82	1835.81	1847.6	1618.51	1787.07	2030.22	1754.26	1864.47	2334.71	2670.41	2109.92	2193.86	2336.67	2323.34	2218.63	2306.91	1941.11	1.00568e-05	0.000152372
AT2G26900	6270.22	5641.23	6500.07	6331.92	6501.34	5945.91	5879.38	6321.6	5991.71	4712.85	5361.87	4760.64	5786	5420.68	4901.02	4885.83	4966.51	4869.6	1.00707e-05	0.000152469
AT4G20860	148.976	101.865	83.4928	71.1654	64.0759	54.3151	232.409	75.9848	47.6373	238.055	239.241	221.194	266.529	113.283	180.683	285.977	143.646	162.754	1.00851e-05	0.000152573
AT1G72800	146.769	183.923	193.786	124.314	173.242	223.651	149.818	171.792	181.286	88.4664	131.804	117.368	124.86	128.5	99.1791	110.701	116.846	117.183	1.01991e-05	0.000154182
AT4G28400	398.372	451.789	447.357	478.34	439.039	466.471	464.818	376.62	469.756	712.556	723.26	528.157	711.545	542.744	639.263	615.774	556.36	604.361	1.02807e-05	0.0001553
AT4G34250	562.797	372.561	328.818	832.365	425.986	419.611	687.624	459.212	391.684	418.205	279.114	452.319	415.401	426.08	508.661	477.398	412.714	496.943	1.03103e-05	0.000155632
AT2G05440	1307.68	340.492	299.956	381.05	480.57	273.706	247.775	467.472	84.6885	27.3442	47.6266	149.87	32.8159	77.7764	16.6935	152.214	63.2471	86.8022	1.03437e-05	0.000155919
AT3G50210	286.916	299.935	332.941	321.596	354.791	346.126	432.166	367.535	329.491	615.243	492.88	387.315	467.426	464.122	472.328	533.901	516.697	402.545	1.03448e-05	0.000155919
AT3G12490	2326.23	2361.75	2079.08	2533.13	2158.41	2241.83	2410.53	2656.99	2332.9	1724.29	1982.6	1717.19	2031.38	2034.87	1863.78	1704.33	1952.08	1726.28	1.0443e-05	0.000157282
AT1G23790	60.6938	98.092	136.062	72.0662	91.3675	115.02	39.3751	99.9365	92.628	45.0374	67.5633	45.1417	76.8372	78.6218	43.2067	65.7286	78.2549	10.8503	1.04669e-05	0.000157525
AT5G53870	126.905	49.046	72.1543	106.298	49.8368	59.6401	115.244	50.3812	29.1117	43.4289	59.8101	77.6437	59.2287	69.3225	83.4676	55.3504	43.9514	125.863	1.06121e-05	0.000159591
AT3G49720	1760.12	1220.49	1635.84	1954.8	1664.79	1682.7	2103.21	1256.23	1614.37	1500.71	1375.63	2857.47	1495.92	1646.83	2194.71	2223.24	1570.46	2827.58	1.06217e-05	0.000159618
AT2G02810	158.907	159.4	202.032	156.744	130.525	123.54	201.677	132.147	148.205	188.996	196.044	197.72	223.308	269.681	251.385	166.051	185.453	212.665	1.06309e-05	0.000159637
AT4G25433	7.72467	13.2047	24.7386	7.20662	7.11955	11.715	11.5244	26.4295	5.29303	3.21696	0	3.61133	0	0	0	0	0	2.17006	1.07629e-05	0.000161499
AT5G26570	3815.99	4531.1	4757.03	5963.48	4412.93	4327.1	4544.46	5143.01	4856.36	3446.17	2971.68	3208.67	3597.74	3568.42	4128.21	2586.48	3372.46	3576.25	1.07952e-05	0.000161864
AT5G61380	525.278	573.461	461.788	529.687	563.631	580.426	381.266	526.112	531.95	477.718	439.715	298.838	388.188	474.267	306.375	343.634	425.578	303.808	1.08238e-05	0.000162173
AT3G02580	502.104	350.868	542.188	457.621	404.628	503.746	432.166	328.717	509.454	500.237	618.038	607.607	534.659	620.521	533.211	514.298	526.345	530.579	1.0853e-05	0.000162491
AT1G63710	81.6608	97.1488	123.693	99.0911	119.846	150.165	292.912	122.236	187.903	65.9477	99.6836	83.9635	80.8391	71.8587	94.2693	69.188	82.5428	59.6765	1.08726e-05	0.000162544
AT4G39350	5081.73	3969.9	4840.52	5335.6	4955.21	4625.31	5009.28	4421.98	4952.95	4859.22	5282.12	7204.61	4867.16	5167.91	6391.65	4677.11	4731.74	7614.73	1.08693e-05	0.000162544
AT1G01790	4984.62	4317.94	5270.36	4963.56	5099.97	4909.66	4369.68	4747.4	5203.05	4045.33	4594.3	3711.55	3895.49	3632.67	3422.17	4558.34	4521.63	3536.11	1.0888e-05	0.000162654
AT5G42220	1200.63	1022.42	1141.07	1262.96	1142.69	1198.13	1313.78	1180.24	1168.44	1341.47	1366.77	1410.23	1152.56	1287.54	1423.86	1191.19	1332.48	1635.14	1.09309e-05	0.000163174
AT1G56710	46.348	113.183	68.0312	29.7273	88.9944	90.5252	56.6618	113.151	92.628	111.789	172.785	69.5182	192.093	145.408	70.7019	39.2066	124.35	48.8263	1.10347e-05	0.000164602
AT1G54090	687.496	480.085	458.695	670.216	568.377	515.461	681.862	474.079	586.203	583.878	550.475	642.817	550.667	621.366	694.254	642.296	712.87	837.641	1.10622e-05	0.000164769
AT2G16700	340.989	394.254	314.387	313.488	391.575	288.616	345.733	457.56	381.098	154.414	253.639	229.32	275.333	242.629	153.188	208.717	237.981	215.921	1.10602e-05	0.000164769
AT5G03210	33.1057	287.674	72.1543	112.603	131.712	102.24	259.3	354.32	111.154	16.0848	59.8101	18.0567	51.2248	16.9079	29.4591	9.22507	12.8638	58.5915	1.11097e-05	0.000165355
AT2G25430	1616.66	1560.04	1649.24	1717.88	1320.68	1640.1	1714.26	1441.23	1628.93	1855.38	1864.08	2617.31	1776.06	1900.45	2338.07	1760.84	1540.44	3059.78	1.11392e-05	0.000165447
AT3G07770	1002	1303.49	1100.87	862.092	1057.25	1046.9	878.737	974.587	1160.5	1479.8	1531.8	2344.66	1399.08	1476.91	2092.58	1422.97	1349.63	2568.26	1.11305e-05	0.000165447
AT3G26840	175.46	237.684	158.739	154.042	131.712	146.97	363.98	188.31	252.742	337.781	316.772	302.449	293.742	259.537	344.672	226.014	261.564	452.457	1.11404e-05	0.000165447
AT2G46830	943.513	1760.94	1242.08	1010.73	738.06	943.592	872.015	1020.01	795.278	1557.01	2378.01	3359.44	1737.64	1220.75	2949.84	1023.98	1154.53	2846.03	1.12328e-05	0.000166697
AT3G22370	760.328	786.623	754.528	1272.87	1091.66	946.787	1251.36	1429.67	1188.29	1088.14	910.443	1180	988.479	924.863	1170.51	938.651	1003.38	1236.93	1.12844e-05	0.000167339
AT5G42980	11417.1	14015.8	16093.5	11918.9	14820.5	15733.3	12409.9	17100.7	14889.3	12094.2	13507.1	12716.4	12971.1	13362.3	10236.1	11184.2	13344.1	10956.6	1.13007e-05	0.000167459
AT5G03770	59.5903	85.8305	72.1543	61.2563	66.4491	52.1851	65.3051	66.8996	92.628	123.853	110.76	83.9635	98.4477	122.582	74.6298	139.529	126.494	91.1423	1.14376e-05	0.000169363
AT5G48430	33.1057	1.88638	0	2.70248	7.11955	0	5.76221	4.95553	0	30.5611	13.2911	161.607	0.800388	10.1448	39.2789	39.2066	23.5837	56.4214	1.15243e-05	0.000170522
AT1G77270	123.595	178.263	204.094	139.628	202.907	174.66	105.641	173.443	148.205	190.605	260.285	128.202	191.293	197.823	144.35	156.826	195.101	98.7375	1.15367e-05	0.000170582
AT4G14360	1640.94	1042.23	1434.84	1565.64	1389.5	1246.05	1409.82	1189.33	1332.52	1120.31	1250.47	2019.64	1247.8	1163.26	1718.45	1324.95	1377.5	2032.26	1.15489e-05	0.000170637
AT1G56230	675.357	760.213	754.528	701.745	749.926	637.936	750.048	922.554	664.275	681.995	755.38	538.991	737.157	622.211	596.057	518.91	520.985	458.967	1.15829e-05	0.000171015
AT1G14830	1639.84	1228.98	1475.04	1637.71	1518.84	1613.48	1741.15	1411.5	1529.69	1499.91	1546.2	2267.01	1422.29	1563.14	1872.62	1499.07	1377.5	2047.45	1.16176e-05	0.000171402
AT3G06030	180.978	178.263	236.048	154.042	220.706	194.895	84.5124	158.577	156.144	93.2918	196.044	103.826	137.667	152.171	107.035	92.2507	117.918	60.7616	1.174e-05	0.000173082
AT1G22360	722.808	760.213	854.513	996.316	695.343	827.507	1076.57	662.389	969.948	1712.23	1324.68	1175.49	1303.83	1226.67	1415.02	1722.78	1554.38	1037.29	1.17678e-05	0.000173365
AT5G02860	608.042	651.746	576.204	770.208	620.587	648.586	601.191	697.078	578.264	469.676	499.525	460.445	434.61	473.422	458.581	462.407	572.44	437.266	1.17776e-05	0.000173384
AT4G03200	1272.36	1480.81	1416.29	1518.8	1515.28	1524.02	1601.89	1864.93	1680.54	1474.17	1388.92	1057.22	1384.67	1355.17	1305.04	1330.72	1386.08	1152.3	1.18519e-05	0.000174351
AT3G08720	108.145	156.57	99.9853	118.008	137.645	145.905	276.586	175.921	279.207	296.764	293.513	205.846	307.349	205.431	187.557	269.833	362.331	218.091	1.18835e-05	0.000174581
AT5G16590	931.374	478.199	664.85	880.109	599.229	734.852	629.041	498.031	817.773	833.997	725.475	1126.74	644.312	808.199	1089.01	1043.59	905.827	1128.43	1.18848e-05	0.000174581
AT5G32450	903.786	646.087	772.051	902.63	816.375	893.537	948.844	661.563	870.703	1196.71	879.43	1410.23	782.779	1133.68	1304.06	1587.87	1211.34	1302.03	1.19179e-05	0.00017494
AT1G02730	1107.94	857.362	911.206	504.464	978.938	1025.6	399.513	692.122	897.169	525.169	540.506	511.906	616.298	769.31	322.087	490.082	663.559	316.828	1.19526e-05	0.000175322
AT2G26440	269.26	445.187	565.896	185.571	606.348	1494.2	825.917	498.031	1474.11	1451.65	996.836	411.692	902.037	1093.1	490.986	1102.4	1100.93	547.939	1.20369e-05	0.000176431
AT1G26380	19.8634	13.2047	6.18466	12.6116	2.37318	0	120.046	15.6925	15.8791	730.25	492.88	97.506	418.603	131.882	37.3149	350.553	283.004	54.2514	1.20588e-05	0.000176625
AT2G17560	911.511	985.636	986.453	823.357	880.451	937.202	802.868	907.688	828.359	762.419	707.753	737.615	767.572	814.962	659.885	769.14	768.613	767.115	1.20769e-05	0.000176762
AT3G54810	1359.54	711.167	645.266	1576.45	777.217	930.812	1031.44	774.714	1090.36	792.176	656.804	1230.56	650.715	737.185	651.047	747.231	816.852	1398.6	1.21378e-05	0.000177524
AT1G01550	2683.77	2657.92	2485.2	2870.94	2708.99	2897.87	2991.55	2429.03	2751.05	3726.85	3503.32	3010.05	3384.04	3058.64	3405.48	3866.46	3461.44	3481.85	1.21806e-05	0.000178022
AT1G17500	745.982	820.577	800.913	773.811	872.145	932.942	1025.67	1019.19	1042.73	811.478	748.734	564.271	794.785	798.054	582.309	756.456	885.459	504.538	1.21964e-05	0.000178123
AT3G62370	441.41	466.88	536.003	554.91	501.928	733.787	485.947	575.667	681.478	533.211	521.677	342.174	481.033	497.093	321.105	618.08	633.543	384.1	1.22617e-05	0.000178948
AT3G10200	69.522	146.195	82.4621	77.4712	81.8748	72.4202	34.5733	76.8107	88.6583	49.8629	73.1013	25.2793	93.6453	65.0955	41.2428	43.8191	45.0234	17.3604	1.24344e-05	0.000181337
AT2G40030	357.542	518.756	416.433	380.149	510.234	375.946	332.288	385.705	465.787	369.146	427.532	226.611	367.378	360.984	245.493	394.372	409.498	246.301	1.25575e-05	0.000183001
AT3G09220	59.5903	0.943192	0	36.0331	7.11955	2.13	30.7318	11.5629	1.32326	0	0	18.0567	0	2.53619	0	9.22507	1.07198	65.1017	1.25895e-05	0.000183336
AT3G56290	399.476	390.482	432.926	353.125	401.068	373.816	315.961	436.087	349.34	460.025	579.272	1963.66	477.031	391.418	1080.17	471.632	328.027	1612.35	1.26391e-05	0.000183926
AT1G80560	589.282	595.154	617.435	575.629	653.812	724.202	671.298	578.145	754.257	878.23	736.551	867.623	725.951	769.31	663.813	955.948	912.259	941.804	1.26796e-05	0.000184383
AT1G78370	18928.8	8970.7	17319.1	9323.57	15328.4	14392.4	14705.2	15800.7	14910.5	7043.53	14890.5	4144.91	10852.5	13829	5470.56	6949.94	7203.74	4314.07	1.2749e-05	0.000185126
AT2G28890	822.126	747.952	723.605	715.257	957.579	976.607	1012.23	908.514	917.017	707.731	696.677	415.303	698.738	590.932	376.095	676.89	693.574	490.433	1.27454e-05	0.000185126
AT2G21540	460.17	117.899	181.417	377.447	247.998	307.786	445.611	222.999	280.531	293.548	238.133	591.356	231.312	384.655	451.707	584.639	420.218	547.939	1.28011e-05	0.000185749
AT1G04570	133.526	228.253	126.785	138.727	202.907	130.995	153.659	345.235	133.649	19.3018	68.6709	99.3117	73.6357	38.8882	72.6659	36.9003	15.0078	93.3124	1.2811e-05	0.000185759
AT3G54140	1164.22	1079.96	1063.76	1403.49	1099.97	1055.42	1517.38	1093.52	1061.25	1173.39	1421.04	1425.57	1186.97	1181.02	1410.11	1382.61	1263.87	1643.82	1.29819e-05	0.000188103
AT1G56510	563.901	780.963	787.513	669.315	682.29	752.957	676.1	769.759	722.499	1143.63	952.532	753.866	932.451	801.435	809.144	864.851	871.524	682.483	1.30638e-05	0.000189154
AT1G66920	103.731	193.354	135.032	148.637	129.338	172.53	223.766	133.799	165.407	440.723	332.279	154.384	349.769	380.428	248.439	325.184	394.49	159.499	1.31434e-05	0.00019017
AT3G62030	15147	9666.78	16043	14049.3	15593	15696	10311.5	13567.4	14869.4	9252.78	8290.35	8916.38	10170.5	10933.5	6741.23	11443.7	10869.9	7295.73	1.31587e-05	0.000190257
AT2G42130	1350.71	1286.51	1465.76	1501.68	1477.31	1600.7	1250.4	1579.99	1376.19	1278.74	1162.97	871.234	1324.64	1255.41	859.225	1307.65	1163.1	830.046	1.32395e-05	0.000191166
AT5G55140	314.504	270.696	350.464	290.967	233.759	310.981	287.15	277.51	173.347	371.559	390.981	507.392	329.76	388.037	512.589	356.318	335.531	445.946	1.32406e-05	0.000191166
AT5G17920	40125.2	24848.4	36241.1	33755.8	34598.6	33950.1	32834	27424.7	33129.1	31720	33910.1	72555.3	31292	36890.5	55852.6	39221.5	31267.7	69993	1.34255e-05	0.000193699
AT2G15790	250.5	154.684	189.663	254.934	218.333	241.756	245.854	179.225	201.135	197.039	181.646	249.182	214.504	232.484	297.537	200.645	240.125	362.399	1.34459e-05	0.000193855
[truncated: 3,158 more rows]
