# Supplementary material for: Transcriptome-derived networks reconstruct distinct immune strategies under different iron availability between Arabidopsis and rice
Source: Research Square preprint supplement (doi:10.21203/rs.3.rs-3214423/v1), 2024-07-15
Supplement: Supplementary file 6 [file 8b3e5b4318bf2f5b13c30b7b.xlsx]

## Sheet: Ath GRNs
	-Fe				suf				+Fe
	AthTF	target	weight		AthTF	target	weight		AthTF	target	weight
	AT2G31730	AT5G06630	0.140949		AT3G05690	AT1G60750	0.159717		AT3G58120	AT5G45830	0.196333
	AT2G38300	AT5G06630	0.130193		AT1G74930	AT1G19940	0.155542		AT3G58120	AT5G25460	0.167746
	AT2G23290	AT5G06630	0.122665		AT3G27650	AT5G36740	0.148975		AT5G24110	AT5G40990	0.166999
	AT3G13960	AT5G03870	0.13934		AT2G46830	AT3G19970	0.146382		AT4G37730	AT5G59490	0.156241
	AT3G24520	AT2G24720	0.137914		AT3G09600	AT3G19970	0.126805		AT1G01250	AT2G36255	0.154576
	AT1G49560	AT2G24720	0.122389		AT4G36570	AT2G24720	0.141529		AT2G26150	AT2G36255	0.1363
	AT4G31620	AT2G24720	0.119066		AT2G40750	AT3G62780	0.131976		AT5G24110	AT1G65484	0.144228
	AT1G06160	AT3G14225	0.137438		AT2G40750	AT2G34940	0.130988		AT3G58120	AT1G22330	0.138776
	AT2G43000	AT4G16260	0.135763		AT1G62975	AT2G21188	0.128342		AT1G49560	AT2G24720	0.133564
	AT3G24520	AT4G01630	0.132947		AT2G43000	AT4G16260	0.126266		AT4G37730	AT2G24720	0.125669
	AT3G24520	AT1G08090	0.131725		AT5G04150	AT1G23020	0.124017		AT1G04990	AT2G39030	0.132994
	AT1G49560	AT1G08090	0.122546		AT2G43000	AT2G30750	0.123523		AT3G58120	AT2G36050	0.129022
	AT5G48250	AT1G30250	0.129927		AT1G19510	AT5G52390	0.120602		AT2G40750	AT3G62780	0.126009
	AT1G06160	AT4G15236	0.128637		AT3G51910	AT3G30775	0.12034		AT5G24110	AT2G02930	0.125131
	AT5G48250	AT5G38970	0.128549		AT1G19510	AT3G49340	0.119142		AT1G56650	AT1G73325	0.125111
	AT1G06160	AT3G26830	0.127027		AT3G09600	AT5G18600	0.117716		AT5G25390	AT3G48100	0.124244
	AT3G02380	AT1G19960	0.126236		AT1G06160	AT5G40990	0.117183		AT4G37180	AT3G53980	0.121396
	AT1G18570	AT1G21100	0.125136		AT2G37430	AT5G40990	0.105601		AT2G23290	AT5G56100	0.120735
	AT1G06160	AT5G40990	0.12509		AT4G01720	AT5G44575	0.115897		AT4G09820	AT5G56100	0.107708
	AT2G38300	AT1G07610	0.123567		AT4G01720	AT3G26500	0.115299		AT4G37730	AT1G60750	0.120459
	AT1G18570	AT5G05730	0.12356		AT4G17500	AT1G76600	0.114714		AT1G73830	AT1G60750	0.119761
	AT3G24520	AT1G25422	0.123081		AT1G80840	AT4G37290	0.114224		AT1G49560	AT1G60750	0.118503
	AT3G24520	AT1G19530	0.121618		AT2G43000	AT4G37290	0.0977219		AT5G24110	AT1G51090	0.119848
	AT2G23290	AT4G17860	0.118677		AT4G36570	AT2G24980	0.112729		AT1G19510	AT5G44575	0.119691
	AT5G67450	AT1G70260	0.117511		AT5G46830	AT4G15990	0.112647		AT5G24110	AT5G44575	0.114066
	AT4G31620	AT1G70260	0.108418		AT1G06160	AT3G16530	0.110634		AT5G24110	AT3G26500	0.118977
	AT2G46680	AT4G06536	0.117178		AT5G46830	AT1G48100	0.109785		AT4G36570	AT5G23010	0.117152
	AT3G02380	AT4G31877	0.116498		AT3G06160	AT1G68850	0.109409		AT5G61590	AT2G25200	0.116813
	AT2G43000	AT3G08720	0.116004		AT4G23810	AT1G66920	0.107659		AT4G09820	AT4G14090	0.116783
	AT2G43000	AT2G18660	0.115969		AT4G01720	AT1G66920	0.0953342		AT4G21440	AT4G25000	0.116778
	AT1G18570	AT1G78410	0.11553		AT1G01250	AT3G26200	0.107341		AT4G09820	AT1G19570	0.116656
	AT2G38300	AT2G18980	0.115026		AT2G46680	AT1G69260	0.107195		AT1G56650	AT1G19570	0.116316
	AT1G06160	AT2G18980	0.09973		AT5G46830	AT1G69260	0.0984168		AT5G24110	AT3G22060	0.116237
	AT3G54390	AT5G56870	0.114309		AT4G23810	AT4G18250	0.106269		AT2G46270	AT3G25760	0.116017
	AT4G06746	AT5G56870	0.0997692		AT3G05690	AT1G77760	0.106212		AT5G24110	AT4G23280	0.114997
	AT1G06160	AT1G26380	0.113955		AT5G48250	AT4G17680	0.10591		AT5G24110	AT1G02920	0.114446
	AT1G18570	AT1G26380	0.0996058		AT4G25480	AT1G52750	0.105783		AT5G25390	AT2G44790	0.114292
	AT4G31620	AT2G39510	0.113874		AT3G16770	AT1G52750	0.0951414		AT3G11580	AT5G44380	0.113886
	AT2G38300	AT5G06640	0.113835		AT5G46830	AT5G49120	0.105489		AT5G24110	AT5G15970	0.113314
	AT2G31730	AT5G06640	0.100247		AT5G46830	AT1G78440	0.105456		AT2G31730	AT4G16740	0.113145
	AT1G18570	AT1G07620	0.113752		AT5G24110	AT1G21120	0.105392		AT1G75250	AT2G36690	0.112913
	AT1G18570	AT2G24600	0.113481		AT4G23810	AT1G21120	0.0931469		AT5G03720	ATMG00120	0.112125
	AT1G18570	AT4G23280	0.113291		AT1G06160	AT2G26650	0.105375		AT4G09820	AT1G45191	0.111945
	AT5G48250	AT4G12400	0.113121		AT2G40750	AT4G21380	0.105237		AT5G25390	AT4G37140	0.111657
	AT2G37260	AT2G29710	0.11257		AT1G06160	AT3G26830	0.104745		AT2G46680	AT4G06536	0.110813
	AT3G24520	AT2G29710	0.100054		AT2G46680	AT1G18870	0.104462		AT5G24110	AT1G51800	0.110636
	AT1G80840	AT1G59950	0.112412		AT5G46830	AT1G18870	0.090591		AT3G58120	AT2G05540	0.1102
	AT3G16770	AT1G27921	0.112403		AT4G23810	AT3G15518	0.104392		AT5G61590	AT2G37950	0.110083
	AT3G54390	AT1G27921	0.0979161		AT5G46830	AT2G39800	0.103558		AT4G09820	AT2G01850	0.108844
	AT4G37180	AT3G53980	0.112367		AT1G64380	AT3G48250	0.103163		AT2G23290	AT2G01850	0.100354
	AT5G67450	AT4G13280	0.112203		AT5G46830	AT2G40330	0.102793		AT2G40750	AT3G23120	0.108605
	AT4G31620	AT4G13280	0.111107		AT4G25480	AT2G40330	0.100678		AT2G31730	AT5G06630	0.108523
	AT1G25560	AT1G72920	0.112125		AT2G46680	AT2G40330	0.0988072		AT4G24150	AT5G06630	0.10804
	AT5G67450	AT1G11080	0.111604		AT2G28500	AT5G59220	0.102718		AT2G23290	AT5G06630	0.107082
	AT4G31620	AT1G11080	0.110234		AT3G05690	AT5G02160	0.102542		AT4G36570	AT5G06630	0.102895
	AT2G31730	AT4G16740	0.111536		AT2G46830	AT5G02160	0.0916581		AT5G05790	AT5G38970	0.108351
	AT3G24520	AT3G02885	0.111496		AT2G43000	AT1G19020	0.102367		AT5G61590	AT4G19420	0.108351
	AT4G31620	AT3G02885	0.105227		AT1G06160	AT1G19020	0.0877763		AT4G37730	AT1G05260	0.107445
	AT1G06160	AT5G25930	0.111378		AT3G11020	AT4G36230	0.102264		AT3G54390	AT2G30600	0.106844
	AT1G18570	AT5G25930	0.106385		AT4G17490	AT4G02850	0.102173		AT5G28770	AT2G30600	0.105999
	AT5G59820	AT1G75060	0.11124		AT2G40750	AT5G39240	0.10205		AT4G06746	AT1G78460	0.105941
	AT2G31730	AT1G48100	0.110516		AT4G01720	AT1G36622	0.101845		AT5G61590	AT1G78460	0.100259
	AT5G46830	AT1G48100	0.100352		AT5G24110	AT1G36622	0.101063		AT5G28770	AT1G78460	0.0946155
	AT5G67450	AT1G60470	0.11045		AT1G19510	AT1G36622	0.0976997		AT5G25390	AT4G39795	0.105686
	AT3G54390	AT5G20250	0.11017		AT1G06160	AT1G02920	0.101745		AT5G67411	AT1G04360	0.105446
	AT1G18570	AT1G19020	0.109505		AT3G02380	AT5G60900	0.101631		AT5G03720	AT3G48360	0.105127
	AT1G06160	AT1G19020	0.0958579		AT2G40750	AT5G60900	0.0977424		AT5G43290	AT3G48360	0.0897971
	AT4G37180	AT2G36630	0.109018		AT2G28160	AT5G60900	0.0970061		AT3G06160	AT5G52300	0.105108
	AT3G11020	AT2G36630	0.102879		AT4G01720	AT1G51800	0.101279		AT4G36570	AT5G52300	0.101175
	AT4G25480	AT2G36630	0.0937208		AT1G19510	AT1G51800	0.09595		AT2G47890	AT4G33020	0.105107
	AT5G67450	AT1G77760	0.108916		AT3G05690	AT5G02580	0.101201		AT5G25390	AT4G33020	0.100315
	AT4G06746	AT1G15125	0.10834		AT5G04150	AT5G02580	0.0901307		AT2G31730	AT1G56600	0.104791
	AT1G18570	AT1G51920	0.108111		AT4G36570	AT4G35770	0.101008		AT4G09820	AT2G38995	0.104676
	AT1G06160	AT5G20960	0.107117		AT3G16770	AT4G35770	0.0994441		AT3G62610	AT1G10970	0.104018
	AT4G31620	AT3G47790	0.107091		AT3G11020	AT4G35770	0.0902501		AT5G56780	AT1G10970	0.0995382
	AT1G49560	AT3G47790	0.104216		AT1G06160	AT1G26380	0.100996		AT3G06160	AT1G69520	0.103852
	AT3G24520	AT3G47790	0.0930039		AT4G17460	AT3G44860	0.100871		AT5G25390	AT1G12080	0.103591
	AT1G18570	AT5G20230	0.107089		AT2G28160	AT3G44860	0.0886497		AT4G06746	AT1G15670	0.103517
	AT5G47230	AT3G01830	0.107022		AT1G06160	AT5G57220	0.100622		AT4G39250	AT3G01990	0.103296
	AT1G80840	AT3G01830	0.102465		AT1G06160	AT1G26420	0.100293		AT5G56780	AT5G50400	0.103274
	AT5G24110	AT3G01830	0.100296		AT5G24110	AT1G26420	0.0986178		AT2G47890	AT5G50400	0.10293
	AT5G46830	AT3G14360	0.106873		AT2G46680	AT4G23450	0.0995958		AT1G04990	AT1G17170	0.102428
	AT1G18570	AT4G33050	0.106716		AT5G24110	AT1G65484	0.0993291		AT1G68840	AT5G21940	0.1023
	AT2G24700	AT5G66230	0.10656		AT5G67190	AT5G08350	0.0992173		AT2G31730	AT1G48100	0.102269
	AT1G18570	AT1G26420	0.106496		AT5G46830	AT3G29575	0.0990793		AT3G02990	AT1G48100	0.101368
	AT5G24110	AT1G26420	0.0988241		AT4G36570	AT2G47880	0.0985412		AT2G28500	AT1G80110	0.102042
	AT1G06160	AT1G26420	0.091088		AT2G40750	AT2G47880	0.092992		AT1G01250	AT3G26200	0.102033
	AT3G54390	AT2G28630	0.106474		AT1G16640	AT1G64170	0.0984328		AT5G28770	AT3G26200	0.0978369
	AT2G46680	AT5G06760	0.106316		AT4G23810	AT1G05675	0.0979148		AT4G06746	AT3G26200	0.0883668
	AT4G31620	AT2G30660	0.105969		AT4G01720	AT1G05675	0.0923517		AT4G09820	AT5G13170	0.101785
	AT1G49560	AT2G30660	0.101577		AT5G24110	AT1G05675	0.0856772		AT4G37180	AT5G13170	0.0929489
	AT3G24520	AT2G30660	0.0998061		AT1G06160	AT5G20960	0.0978526		AT1G56650	AT4G21910	0.101704
	AT4G23810	AT4G31500	0.105961		AT2G37430	AT5G20960	0.0908317		AT2G46680	AT1G69260	0.101672
	AT4G01720	AT4G31500	0.0925818		AT3G51910	AT5G52250	0.0978343		AT3G11580	AT1G14520	0.101292
	AT1G18570	AT1G33030	0.105913		AT2G22770	AT5G52250	0.0895811		AT3G58120	AT3G19680	0.101228
	AT1G06160	AT1G33030	0.101651		AT5G05790	AT4G19970	0.0976634		AT5G24110	AT1G23020	0.101113
	AT1G18570	AT5G26920	0.105861		AT4G36570	AT2G05440	0.0971273		AT4G09820	AT1G78370	0.10098
	AT4G23810	AT5G26920	0.0909303		AT3G06160	AT4G19230	0.0966392		AT2G23290	AT1G78370	0.0975394
	AT5G24110	AT1G53035	0.105696		AT1G26945	AT5G50950	0.096638		AT4G09820	AT4G22880	0.100727
	AT1G19510	AT5G44575	0.105685		AT4G36570	AT5G50950	0.0837783		AT3G06160	AT5G20960	0.10063
	AT4G01720	AT5G44575	0.0983261		AT5G56840	AT3G44550	0.096561		AT1G56650	AT1G52410	0.100443
	AT4G09820	AT5G42800	0.105468		AT3G06160	AT3G44550	0.0945172		AT4G09820	AT1G52410	0.0877971
	AT2G46680	AT1G69260	0.105392		AT4G39780	AT3G46490	0.0965564		AT4G24150	AT1G23010	0.100422
	AT2G28500	AT1G11210	0.104858		AT5G24110	AT1G53035	0.0965155		AT1G04990	AT1G23010	0.100407
	AT4G01720	AT3G26500	0.104724		AT3G02380	AT4G31877	0.0961772		AT5G28770	AT3G13750	0.100289
	AT4G23810	AT2G32030	0.104699		AT2G28500	AT2G47670	0.0958992		AT4G06746	AT1G80180	0.0999182
	AT1G80840	AT2G32030	0.103945		AT3G05690	AT2G18150	0.0956466		AT5G61590	AT1G80180	0.0860688
	AT1G18570	AT5G61160	0.104455		AT1G06160	AT2G18150	0.0869324		AT1G56650	AT3G59140	0.0997185
	AT1G18570	AT5G03630	0.10425		AT4G17500	AT2G43050	0.0955753		AT2G23290	AT5G61290	0.0986075
	AT4G23810	AT5G03630	0.100066		AT3G09600	AT5G38010	0.0953911		AT4G09820	AT5G61290	0.0858442
	AT1G18570	AT3G01290	0.104227		AT2G46830	AT5G38010	0.0929383		AT1G56650	AT1G73010	0.0985623
	AT4G23810	AT1G05010	0.103823		AT5G61590	AT4G17245	0.0953128		AT2G37260	AT1G73010	0.0840887
	AT1G18570	AT2G26560	0.103619		AT2G22800	AT4G17245	0.0873033		AT3G11580	AT1G23760	0.0985176
	AT1G18570	AT1G02920	0.103518		AT4G06746	AT1G15125	0.0952955		AT4G37180	AT3G28270	0.0985049
	AT1G06160	AT1G02920	0.103268		AT1G01250	AT1G15125	0.0873121		AT2G40750	AT4G04695	0.0975577
	AT1G06160	AT3G16530	0.103349		AT5G48250	AT1G30250	0.0947147		AT5G61590	AT5G19120	0.0974626
	AT1G18570	AT3G16530	0.0967916		AT5G05790	AT1G30250	0.08991		AT1G01250	AT1G11210	0.0972761
	AT1G18570	AT5G11670	0.103121		AT5G56840	AT5G52300	0.0945962		AT2G28500	AT1G11210	0.0868178
	AT1G80840	AT5G67080	0.103082		AT3G06160	AT5G52300	0.092135		AT3G16770	AT3G62860	0.0971821
	AT1G18570	AT4G03450	0.103046		AT1G06160	AT5G52300	0.0836005		AT2G40750	AT4G21380	0.096545
	AT1G06160	AT1G21110	0.103021		AT5G46830	AT1G07430	0.0935077		AT4G09820	AT1G52040	0.0961041
	AT1G18570	AT1G21110	0.0937679		AT1G01250	AT1G07430	0.0807823		AT4G09820	AT1G52400	0.0960092
	AT1G18570	AT1G52200	0.10286		AT5G24110	AT3G50740	0.0931889		AT5G05790	AT4G19430	0.0958441
	AT4G06746	AT1G52200	0.0931887		AT4G01720	AT3G50740	0.0862119		AT2G23290	AT4G17860	0.0954132
	AT1G18570	AT1G26410	0.102851		AT4G23810	AT3G50740	0.0828449		AT4G24150	AT4G17860	0.0834495
	AT5G46830	AT2G39800	0.102823		AT5G24110	AT5G57123	0.0929011		AT5G28770	AT2G45170	0.095036
	AT2G28500	AT2G21820	0.102605		AT4G36570	AT2G17740	0.0926835		AT5G24110	AT3G16530	0.0949603
	AT2G23290	AT2G24980	0.102581		AT5G24110	AT5G46050	0.0926474		AT4G06746	AT3G16530	0.0829795
	AT4G36260	AT2G24980	0.0967686		AT1G06160	AT4G23280	0.0925157		AT4G36570	AT3G02020	0.0949491
	AT2G31730	AT2G24980	0.0953961		AT2G28500	AT5G66400	0.0924362		AT1G56650	AT5G24770	0.0948229
	AT2G38300	AT2G24980	0.0875775		AT4G38000	AT3G28300	0.0923818		AT4G09820	AT5G24770	0.0826877
	AT4G23810	AT1G66920	0.102568		AT2G46680	AT2G21650	0.0922896		AT5G24110	AT2G43590	0.0947576
	AT1G18570	AT1G66920	0.0878445		AT3G51910	AT2G21650	0.0829763		AT1G56650	AT4G27450	0.0947371
	AT2G46680	AT5G15190	0.102156		AT4G23810	AT1G21100	0.0921316		AT4G09820	AT5G54060	0.0947279
	AT3G54390	AT1G02640	0.102138		AT5G24110	AT1G21100	0.0913078		AT5G28770	AT5G64410	0.0947015
	AT4G01720	AT1G05675	0.10195		AT4G01720	AT1G21100	0.0824487		AT1G01250	AT5G64410	0.088476
	AT2G24700	AT5G25090	0.101827		AT3G05690	AT3G62040	0.0910793		AT2G43140	AT5G64410	0.0825943
	AT4G23810	AT3G54640	0.101612		AT4G23810	AT4G15760	0.0907007		AT3G16770	AT5G52810	0.0945222
	AT5G24110	AT3G54640	0.0970695		AT1G27730	AT4G15760	0.0836999		AT4G09820	AT1G03940	0.0937128
	AT4G01720	AT3G54640	0.0909925		AT3G55980	AT4G15760	0.0776904		AT2G37260	AT1G14250	0.0936979
	AT1G18710	AT3G13790	0.101603		AT4G20970	AT5G42880	0.090668		AT1G56650	AT5G19875	0.0936004
	AT1G18570	AT3G23550	0.101142		AT5G46830	AT3G16670	0.0904446		AT5G61590	AT1G17147	0.0935829
	AT1G18570	AT3G50740	0.100922		AT3G09600	AT5G57625	0.0903276		AT2G46270	AT3G23730	0.0927302
	AT4G23810	AT3G50740	0.0902255		AT1G16640	AT5G05500	0.0903225		AT5G24110	AT4G20000	0.0927162
	AT5G24110	AT3G50740	0.0865052		AT5G56840	AT5G05500	0.0775411		AT1G19510	AT4G20000	0.0914416
	AT2G43000	AT1G10070	0.100723		AT1G27730	AT2G17710	0.0898451		AT5G43290	AT1G17060	0.0923958
	AT1G18570	AT3G09020	0.100136		AT4G17500	AT2G17710	0.0846485		AT2G37260	AT5G52250	0.0921827
	AT2G26150	AT3G09440	0.100092		AT4G23810	AT2G17710	0.0785037		AT4G06746	AT1G52270	0.0920325
	AT2G23290	AT3G08770	0.0999788		AT3G02380	AT3G47860	0.0892303		AT5G28770	AT1G52270	0.0807182
	AT1G18570	AT5G37490	0.0990304		AT2G29660	AT3G47860	0.0871799		AT5G67190	AT3G18217	0.0920098
	AT1G18570	AT5G41761	0.0988038		AT2G03710	AT4G26890	0.0888653		AT2G37260	AT5G19100	0.0918274
	AT3G54390	AT5G41761	0.0930572		AT4G01720	AT4G20000	0.0887647		AT2G36270	ATCG00090	0.0916815
	AT4G06746	AT5G41761	0.0915872		AT1G19510	AT4G20000	0.0832604		AT4G37730	ATCG00090	0.0852968
	AT4G31620	AT1G22065	0.0986694		AT4G23810	AT1G76680	0.0885909		AT4G09820	AT1G34580	0.0914011
	AT2G24700	AT3G53210	0.0985577		AT5G46830	AT3G27250	0.0884064		AT2G23290	AT1G34580	0.0812686
	AT5G24110	AT2G02930	0.0984623		AT1G01250	AT3G27250	0.0776888		AT2G26150	AT3G12580	0.0913224
	AT1G18570	AT2G02930	0.0925365		AT2G46830	AT2G38210	0.0882178		AT5G24110	AT1G65486	0.0911811
	AT2G43000	AT4G24350	0.0981159		AT2G28500	AT2G38210	0.0780749		AT1G66230	AT5G22920	0.0910531
	AT1G18570	AT4G24350	0.095491		AT5G24110	AT5G15970	0.0881843		AT1G56650	AT5G22920	0.0838546
	AT4G23810	AT4G24350	0.0848155		AT4G23810	AT5G15970	0.0878384		AT3G51910	AT5G22920	0.0833248
	AT3G54390	AT3G24660	0.0980527		AT2G40750	AT5G03350	0.0880776		AT5G03720	AT1G69790	0.0905926
	AT3G54390	AT1G58190	0.0978827		AT3G04420	AT5G03350	0.0781099		AT4G06746	AT4G04955	0.0905148
	AT5G46830	AT1G58190	0.0901999		AT1G06160	AT1G09970	0.0877002		AT5G61590	AT4G04955	0.0862052
	AT4G37180	AT3G55646	0.0977536		AT1G80840	AT1G09970	0.0781708		AT5G25390	AT4G00200	0.0904691
	AT2G31730	AT3G55646	0.0944832		AT4G23810	AT1G09970	0.076849		AT3G11580	AT4G00200	0.0777898
	AT1G18710	AT3G55646	0.0876605		AT2G46830	AT5G39850	0.0876563		AT4G09820	AT1G21440	0.090401
	AT3G24520	AT4G37970	0.0976143		AT5G61590	AT2G24550	0.087605		AT1G04990	AT2G45570	0.0901659
	AT4G37180	AT4G37970	0.084895		AT4G20970	AT5G42900	0.0874665		AT2G31730	AT2G45570	0.0805373
	AT1G06160	AT5G20400	0.0975731		AT4G20970	AT1G73540	0.0873508		AT5G05790	AT2G45570	0.0784778
	AT1G06160	AT1G79680	0.0974708		AT5G48250	AT1G73540	0.0765821		AT3G26790	AT1G75090	0.0898749
	AT1G18570	AT1G79680	0.0890597		AT2G28500	AT1G73540	0.0764701		AT5G24110	AT2G42540	0.0898512
	AT2G43000	AT1G79680	0.0841022		AT5G24110	AT1G26410	0.0873047		AT1G19510	AT2G42540	0.0822031
	AT4G23810	AT1G21120	0.0973004		AT1G19510	AT1G26410	0.0829154		AT2G28500	AT2G18050	0.0897971
	AT1G18570	AT1G21120	0.0919009		AT4G23810	AT1G26410	0.0816017		AT1G18710	AT3G28220	0.0896553
	AT5G59820	AT1G21550	0.0971671		AT4G01720	AT1G26410	0.0807696		AT5G28770	AT1G49200	0.0896104
	AT5G59820	AT4G33260	0.0969547		AT1G06160	AT1G26410	0.0762884		AT5G61590	AT1G49200	0.0891301
	AT4G09820	AT5G47610	0.0966901		AT2G46680	AT1G13920	0.0871527		AT1G68840	AT1G49200	0.0868221
	AT2G23290	AT5G47610	0.0875367		AT2G03710	AT1G13920	0.0753426		AT4G06746	AT1G49200	0.0764894
	AT1G80840	AT3G15518	0.0966839		AT4G25480	AT2G47560	0.0867745		AT3G51910	AT2G19910	0.0895088
	AT4G23810	AT3G15518	0.0924921		AT2G28500	AT2G47560	0.0813926		AT1G67970	AT2G19910	0.0796748
	AT5G24110	AT3G15518	0.0883519		AT2G46680	AT1G28010	0.0866427		AT1G75250	AT5G06760	0.0893634
	AT2G43000	AT2G14610	0.0965658		AT3G51910	AT1G28010	0.082132		AT1G56650	AT3G28300	0.0893037
	AT4G23810	AT1G76680	0.0965496		AT4G25480	AT1G28010	0.0756775		AT4G09820	AT3G28300	0.0819042
	AT4G39250	AT3G01990	0.0964378		AT5G46830	AT1G28010	0.074063		AT4G36570	AT5G57810	0.0891775
	AT5G24110	AT5G46050	0.0962439		AT1G19510	AT3G18250	0.0865704		AT5G05790	AT1G12940	0.0889527
	AT5G24110	AT1G09970	0.0962319		AT4G01720	AT3G18250	0.0751554		AT1G68840	AT5G15330	0.0889099
	AT4G23810	AT1G09970	0.0906214		AT3G06160	AT3G28550	0.0863388		AT5G61590	AT3G15770	0.0885085
	AT1G80840	AT1G09970	0.0845689		AT3G06160	AT5G13580	0.0862502		AT5G28770	AT3G15770	0.0860273
	AT1G18570	AT1G09970	0.082797		AT2G43000	AT1G60730	0.0861859		AT1G56650	AT3G15770	0.080314
	AT2G43000	AT1G64710	0.0956865		AT4G17490	AT1G32920	0.0861257		AT5G24110	AT1G20450	0.0882633
	AT1G18570	AT1G64710	0.093103		AT5G47230	AT1G32920	0.0810291		AT2G46270	AT1G04040	0.0881759
	AT4G23810	AT1G64710	0.0872745		AT1G06160	AT5G19230	0.0860161		AT4G09820	AT1G04040	0.0835918
	AT1G13260	AT4G30270	0.0955823		AT3G11020	AT1G14200	0.0857867		AT5G67411	AT3G54870	0.0878732
	AT4G01720	AT1G51800	0.0954673		AT5G46830	AT1G14200	0.0791761		AT5G28770	AT5G56870	0.0878653
	AT1G19510	AT1G51800	0.0923779		AT3G51910	AT1G14200	0.0740537		AT2G43140	AT5G56870	0.0820414
	AT5G24110	AT1G51800	0.0898366		AT2G40750	AT1G07050	0.0855541		AT3G54390	AT5G56870	0.0795549
	AT3G16770	AT3G50570	0.0954672		AT5G24110	AT2G02930	0.0853994		AT2G22770	AT5G67480	0.0878392
	AT2G26150	AT3G50570	0.0877321		AT4G23810	AT2G02930	0.0831745		AT3G51910	AT5G67480	0.0819268
	AT3G24520	AT4G33070	0.0952299		AT1G06160	AT2G02930	0.0769677		AT3G62610	AT1G16705	0.0878223
	AT4G31620	AT4G33070	0.0826942		AT1G80840	AT5G44420	0.0849648		AT5G25390	AT1G16705	0.086959
	AT2G28500	AT5G66400	0.0952014		AT2G43000	AT5G44420	0.0786575		AT3G16770	AT5G05860	0.0877527
	AT4G36570	AT4G35770	0.0947799		AT5G46830	AT4G11460	0.0848645		AT1G04990	AT1G65450	0.0876928
	AT3G16770	AT4G35770	0.0888035		AT3G04420	AT4G11460	0.075809		AT3G02380	AT1G65450	0.0749941
	AT4G25480	AT4G35770	0.0844727		AT4G36570	AT4G16740	0.084662		AT4G25480	AT4G32460	0.0876445
	AT3G11020	AT4G35770	0.0806521		AT1G26945	AT4G16740	0.0789609		AT3G11020	AT4G32460	0.0761276
	AT1G18570	AT5G19240	0.0947042		AT5G48250	AT1G09350	0.0846374		AT3G11020	AT4G12470	0.0875723
	AT2G43000	AT1G60730	0.0945983		AT2G28160	AT1G09350	0.0740314		AT4G09820	AT5G17220	0.0874906
	AT4G23810	AT1G60730	0.0810236		AT3G11020	AT4G12470	0.0846272		AT1G56650	AT5G17220	0.0829288
	AT3G11020	AT4G12470	0.0945514		AT2G28500	AT4G12470	0.0773502		AT3G06160	AT5G54720	0.087272
	AT5G46830	AT1G78440	0.0945469		AT3G16770	AT4G12470	0.0766774		AT1G56650	AT2G42870	0.0871217
	AT2G31730	AT1G78440	0.0824427		AT4G38000	AT5G23190	0.0843398		AT2G46680	AT4G23450	0.0870397
	AT5G46830	AT3G29575	0.0945333		AT2G29660	AT1G29395	0.0838654		AT4G06746	AT5G52310	0.0869663
	AT2G31730	AT3G29575	0.0820508		AT1G01250	AT1G29395	0.0717351		AT5G61590	AT5G52310	0.08533
	AT3G24520	AT3G60670	0.0945		AT4G23810	AT5G65600	0.0838633		AT5G28770	AT5G52310	0.0797618
	AT2G43000	AT4G23190	0.0944842		AT5G24110	AT5G65600	0.0800316		AT5G24110	AT5G52310	0.0775177
	AT4G23810	AT4G23190	0.0853631		AT2G03710	AT3G59880	0.0836652		AT5G56780	AT5G67140	0.0869392
	AT5G24110	AT4G23190	0.0841425		AT1G06160	AT3G59880	0.0799849		AT3G02380	AT5G67140	0.0807773
	AT1G18570	AT4G23190	0.0836367		AT3G55980	AT5G22300	0.0835145		AT5G25390	AT5G67140	0.0797151
	AT5G48250	AT2G19310	0.0942982		AT1G27730	AT5G22300	0.0813909		AT3G62610	AT5G67140	0.0766373
	AT5G67190	AT2G19310	0.0829647		AT2G43000	AT5G22300	0.073712		AT5G46830	AT2G39800	0.086831
	AT1G18570	AT2G23770	0.0941336		AT5G61590	AT4G36040	0.083367		AT2G31730	AT2G39800	0.0756816
	AT4G06746	AT2G23770	0.0826009		AT5G67190	AT1G52342	0.0830447		AT1G56650	AT3G15630	0.0868145
	AT2G31730	AT1G19970	0.094109		AT1G06160	AT1G21110	0.0830404		AT3G02380	AT3G60420	0.0867086
	AT4G25480	AT1G04040	0.0940204		AT5G24110	AT1G21110	0.0726986		AT1G67970	AT3G60420	0.0841902
	AT4G09820	AT1G04040	0.0864325		AT1G06160	AT4G21390	0.0829185		AT2G28500	AT5G49525	0.0866618
	AT4G37180	AT1G04040	0.0843306		AT4G23810	AT4G21390	0.080234		AT2G46680	AT1G13920	0.0865094
	AT5G48250	AT3G24500	0.0940099		AT4G39780	AT1G13670	0.08282		AT4G37180	AT1G13920	0.0735935
	AT1G06160	AT1G21240	0.0939776		AT4G23810	AT3G13950	0.0826182		AT3G62610	AT1G20380	0.0864125
	AT5G24110	AT1G21240	0.0812937		AT1G06160	AT3G13950	0.0809456		AT2G47890	AT1G20380	0.0853723
	AT4G23810	AT5G15970	0.0939273		AT2G43000	AT3G13950	0.0762823		AT5G25390	AT1G20380	0.0847321
	AT1G18570	AT5G15970	0.0893976		AT5G61590	AT4G04955	0.0825929		AT5G61590	AT3G61060	0.0864072
	AT4G36570	AT2G39920	0.0937053		AT5G61590	AT5G19120	0.0825629		AT1G56650	AT3G61060	0.084682
	AT4G23810	AT4G18250	0.0934264		AT2G40750	AT1G02450	0.0825574		AT1G66230	AT3G61060	0.078195
	AT1G18570	AT4G18250	0.0855303		AT3G04420	AT1G02450	0.0748112		AT5G05790	AT3G29670	0.0864013
	AT5G24110	AT4G18250	0.0830056		AT4G38000	AT3G28290	0.0822907		AT4G09820	AT2G21590	0.0863961
	AT4G01720	AT4G18250	0.0825917		AT2G46680	AT5G05440	0.0822817		AT4G25480	AT5G11460	0.0862435
	AT1G80840	AT3G49620	0.0933663		AT5G46830	AT5G05440	0.0775294		AT5G25390	AT5G65870	0.0862175
	AT1G49560	AT3G62730	0.0933369		AT3G51910	AT5G05440	0.0724997		AT2G47890	AT5G65870	0.0749843
	AT2G43000	AT2G02010	0.0929297		AT4G23810	AT1G66090	0.082175		AT4G36570	AT2G43100	0.086179
	AT1G06160	AT2G26650	0.0929228		AT3G06160	AT1G69520	0.0821641		AT3G58120	AT4G18970	0.0861507
	AT1G18570	AT2G26650	0.0922884		AT3G02380	AT1G65450	0.082111		AT4G09820	AT3G08770	0.0859271
	AT5G46830	AT1G18870	0.0929054		AT2G43000	AT1G68620	0.0818359		AT2G23290	AT3G08770	0.0822465
	AT2G46680	AT1G18870	0.0906636		AT4G17490	AT5G46600	0.0818336		AT4G09820	AT3G29590	0.085816
	AT5G59820	AT3G09520	0.0924663		AT5G56840	AT5G46600	0.0704857		AT5G05790	AT1G30250	0.0855226
	AT1G18570	AT5G45380	0.0923738		AT5G46830	AT4G21850	0.0813291		AT2G31730	AT1G30250	0.0764243
	AT2G43000	AT5G45380	0.0791876		AT3G51910	AT4G21850	0.0732943		AT4G09820	AT5G42800	0.085397
	AT1G06160	AT3G63380	0.092348		AT3G51910	AT2G39570	0.0812094		AT4G06746	AT3G62150	0.0853718
	AT1G18570	AT3G45440	0.0921001		AT3G16770	AT5G19190	0.0810796		AT5G28770	AT3G62150	0.0853402
	AT1G06160	AT3G45440	0.0869402		AT4G25480	AT5G19190	0.0787321		AT5G24110	AT3G62150	0.0815062
	AT2G43000	AT3G50770	0.0920405		AT2G22770	AT5G59320	0.0809193		AT1G68840	AT3G02480	0.0853694
	AT5G24110	AT5G60100	0.092025		AT4G23810	AT3G16420	0.0807532		AT1G56650	AT3G02480	0.076672
	AT4G23810	AT5G60100	0.0918939		AT4G01720	AT3G16420	0.0799015		AT3G06160	AT5G13580	0.0853275
	AT1G18570	AT5G60100	0.0897403		AT1G19510	AT2G37720	0.0805989		AT3G02990	AT5G13580	0.0749466
	AT4G01720	AT5G60100	0.0786573		AT5G24110	AT3G23550	0.0805067		AT5G25390	AT3G55150	0.0853172
	AT2G43000	AT5G57123	0.0919893		AT1G06160	AT3G23550	0.0797584		AT4G09820	AT4G25433	0.0851858
	AT3G55980	AT4G39670	0.0917735		AT4G23810	AT3G23550	0.0778312		AT4G09820	AT5G35525	0.0851491
	AT1G80840	AT4G39670	0.0849127		AT4G06746	AT3G23550	0.0690701		AT3G54390	AT1G11260	0.0850904
	AT5G24110	AT1G79450	0.0915564		AT5G46830	AT3G55580	0.080317		AT5G28770	AT1G11260	0.0738363
	AT2G26150	AT1G79450	0.0861322		AT3G05690	AT5G41040	0.0800394		AT5G28770	AT3G50140	0.0850219
	AT1G18570	AT5G19230	0.0914901		AT1G06160	AT5G41040	0.077085		AT2G43140	AT3G50140	0.0811698
	AT1G06160	AT5G19230	0.0791699		AT3G06160	AT5G41040	0.0727842		AT2G46270	AT2G45400	0.0849641
	AT3G16770	AT3G12580	0.0913463		AT4G17490	AT5G46730	0.0799079		AT4G37180	AT2G45400	0.0782192
	AT3G51910	AT3G30775	0.0913219		AT5G56840	AT5G46730	0.0747944		AT5G61590	AT3G26510	0.0849612
	AT2G23290	AT3G30775	0.0783436		AT4G17490	AT4G39230	0.0796196		AT5G43290	AT5G60900	0.0849017
	AT4G25480	AT1G70640	0.0911635		AT1G47655	AT5G49320	0.0795488		AT3G02380	AT5G60900	0.0840065
	AT1G18570	AT4G15233	0.0910345		AT2G29660	AT5G49320	0.0719949		AT2G28160	AT5G60900	0.0796673
	AT3G24520	AT3G13784	0.0908539		AT2G43000	AT2G02010	0.0794107		AT2G40750	AT5G60900	0.0778958
	AT2G38300	AT3G13784	0.0784232		AT2G37430	AT2G02010	0.0764785		AT2G28500	AT5G61820	0.0848627
	AT2G31730	AT5G44430	0.0905394		AT2G37430	AT3G15356	0.0792558		AT4G09820	AT3G55110	0.0846321
	AT3G02380	AT5G44430	0.0903863		AT4G06746	AT3G15356	0.0678731		AT1G67970	AT1G68740	0.0845576
	AT2G24700	AT5G44430	0.0848496		AT3G27650	AT3G49110	0.0791693		AT5G24110	AT2G42530	0.0845231
	AT3G11020	AT5G02490	0.090297		AT5G56840	AT3G49110	0.0713532		AT4G21440	AT1G70640	0.084364
	AT3G16770	AT3G50280	0.0901894		AT5G48250	AT3G24500	0.0791575		AT3G58120	AT1G47400	0.0843464
	AT3G54390	AT3G50280	0.0894538		AT5G05790	AT3G24500	0.0761033		AT1G01250	AT1G66940	0.0840246
	AT2G37260	AT3G50280	0.0824757		AT2G28500	AT1G02390	0.0791386		AT5G28770	AT1G66940	0.082277
	AT3G24520	AT5G16360	0.0901745		AT4G23810	AT1G55850	0.078917		AT2G46270	AT4G12730	0.0840064
	AT4G23810	AT2G15390	0.0899582		AT5G24110	AT1G55850	0.0694342		AT2G22770	AT2G44260	0.0838801
	AT1G18570	AT2G15390	0.0843897		AT1G62975	AT2G36800	0.0787913		AT5G61590	AT5G25280	0.0835008
	AT1G27730	AT1G32920	0.089879		AT4G17490	AT2G36800	0.0712714		AT4G06746	AT5G25280	0.0831146
	AT5G47230	AT1G32920	0.0880201		AT4G23810	AT2G15390	0.078789		AT5G28770	AT5G25280	0.076489
	AT5G51190	AT1G32920	0.0831131		AT1G27730	AT2G15390	0.0715748		AT3G06160	AT4G17280	0.0831649
	AT2G38300	AT2G17740	0.0898483		AT3G55980	AT2G15390	0.0700891		AT4G25490	AT4G06534	0.0831475
	AT2G31730	AT2G17740	0.0846355		AT4G01720	AT3G22060	0.0787853		AT2G46680	AT4G06534	0.0749522
	AT1G18570	AT5G60950	0.0897753		AT5G24110	AT3G22060	0.0746939		AT4G37180	AT4G06534	0.0731053
	AT2G46680	AT4G08570	0.089669		AT3G04420	AT5G04310	0.0786626		AT3G58120	AT3G26520	0.0830586
	AT5G46830	AT4G08570	0.0784715		AT3G11020	AT1G20030	0.078662		AT1G18710	AT3G09260	0.0827785
	AT1G18570	AT2G41100	0.0894403		AT5G46830	AT1G20030	0.0703057		AT2G46270	AT5G65730	0.0826592
	AT4G23810	AT2G41100	0.0766266		AT2G28160	AT1G20030	0.0680891		AT2G46270	AT4G08950	0.0826179
	AT2G23290	AT2G23690	0.0890255		AT4G23810	AT1G67810	0.0786363		AT3G11020	AT4G08950	0.0765551
	AT3G54390	AT2G23690	0.0881332		AT1G06160	AT5G61160	0.0785668		AT3G16770	AT2G23690	0.0825092
	AT3G16770	AT2G23690	0.0827321		AT4G23810	AT5G38900	0.078566		AT2G23290	AT2G23690	0.0804292
	AT5G48250	AT1G12940	0.0889483		AT5G24110	AT5G38900	0.0737548		AT1G56650	AT5G16980	0.0825011
	AT4G09820	AT3G23870	0.0886145		AT2G43000	AT5G38900	0.071466		AT2G47890	AT1G07050	0.0824566
	AT4G09820	AT1G03940	0.0885789		AT5G46830	AT1G22690	0.0784748		AT2G40750	AT1G07050	0.0747933
	AT2G28500	AT5G59220	0.0884999		AT2G03710	AT2G19190	0.0784696		AT4G36570	AT1G10560	0.0823737
	AT2G46680	AT5G59220	0.0835392		AT4G36570	AT4G36410	0.078428		AT2G46270	AT4G14130	0.0823149
	AT4G23810	AT1G55850	0.0883456		AT2G22770	AT4G36410	0.0669797		AT2G47890	AT4G22990	0.0822557
	AT1G18570	AT1G55850	0.0817296		AT4G25480	AT2G39200	0.0777996		AT5G56780	AT4G22990	0.0771367
	AT5G24110	AT1G55850	0.0768764		AT4G01720	AT3G21080	0.0776307		AT3G51910	AT1G33790	0.082197
	AT1G06160	AT1G55850	0.0766109		AT4G23810	AT3G21080	0.071946		AT1G68840	AT2G04170	0.0821603
	AT2G24700	AT3G10200	0.0883247		AT5G04150	AT3G61990	0.0772463		AT4G17460	AT1G78750	0.0820414
	AT4G09820	AT2G21590	0.0883093		AT4G36570	AT1G51820	0.0771562		AT1G01250	AT5G59080	0.0818546
	AT4G36570	AT2G18370	0.0882977		AT3G02380	AT1G51820	0.0740918		AT1G68840	AT5G17450	0.0816845
	AT2G38300	AT2G18370	0.0864362		AT4G36570	AT5G66150	0.0771382		AT1G73830	AT5G17450	0.0808646
	AT4G36260	AT5G59680	0.0881878		AT4G39780	AT4G37030	0.0771306		AT5G67190	AT5G17450	0.0795864
	AT1G18570	AT5G65600	0.08818		AT3G51910	AT2G11810	0.0768665		AT3G16770	AT5G17450	0.0739489
	AT4G23810	AT5G65600	0.0877207		AT4G25480	AT2G11810	0.0756663		AT5G05790	AT4G15210	0.0816785
	AT5G24110	AT5G65600	0.0812885		AT2G46680	AT2G11810	0.0672067		AT3G58120	AT4G15210	0.0768457
	AT5G48250	AT3G29670	0.087983		AT1G68840	AT1G26800	0.076825		AT2G46270	AT1G52750	0.081572
	AT5G46830	AT3G09910	0.0878671		AT5G61590	AT3G59940	0.0765876		AT4G17460	AT3G44860	0.0815709
	AT1G06160	AT5G52300	0.0876209		AT4G01720	AT5G25130	0.0764003		AT3G06160	AT1G48930	0.081543
	AT4G36570	AT5G52300	0.0797811		AT1G06160	AT2G43590	0.0761351		AT4G36570	AT1G48930	0.0741695
	AT1G06160	AT3G48850	0.0876167		AT1G46480	AT1G24575	0.0761122		AT5G46830	AT4G13800	0.081521
	AT4G23810	AT3G48850	0.0841689		AT5G24110	AT2G40670	0.0761117		AT4G36570	AT3G05640	0.0813998
	AT2G43000	AT3G48850	0.0831156		AT4G06746	AT1G15670	0.0758751		AT2G28500	AT4G37610	0.0812782
	AT1G80840	AT3G48850	0.0776649		AT5G61600	AT1G15670	0.0751051		AT1G18710	AT3G13790	0.0812426
	AT1G18570	AT3G48850	0.0746256		AT5G48250	AT1G12940	0.075697		AT2G37260	AT3G50280	0.081213
	AT2G31730	AT5G64510	0.0874912		AT5G05790	AT1G12940	0.0678578		AT5G03720	AT1G75580	0.0811425
	AT3G26790	AT5G64510	0.0785544		AT5G67190	AT3G59570	0.0756451		AT5G28770	AT4G01750	0.0811246
	AT2G26150	AT1G02205	0.0872404		AT5G48250	AT3G59570	0.0688172		AT4G06746	AT4G01750	0.0779463
	AT4G36570	AT1G02205	0.084802		AT4G39250	AT2G36690	0.0754371		AT5G24110	AT4G01750	0.0752641
	AT2G46680	AT2G29090	0.0870414		AT4G36570	AT2G36690	0.0676449		AT1G68840	AT4G27300	0.081088
	AT2G43000	AT5G22300	0.0869939		AT2G46830	AT2G36690	0.0651982		AT3G06160	AT4G27300	0.0784033
	AT3G55980	AT5G22300	0.0771217		AT1G25560	AT1G72920	0.0754236		AT4G06746	AT4G27300	0.0744163
	AT1G18710	AT1G07430	0.0868878		AT1G62975	AT1G72920	0.0704327		AT5G61590	AT4G27300	0.070249
	AT5G46830	AT1G07430	0.076922		AT1G06160	AT1G20070	0.0753941		AT3G02990	AT1G78440	0.0810637
	AT4G36260	AT1G07430	0.0757559		AT3G06160	AT1G20070	0.0720276		AT5G46830	AT1G78440	0.0733249
	AT4G01720	AT5G25130	0.0867715		AT5G67190	AT1G78290	0.0749124		AT5G24110	AT1G78070	0.0810633
	AT2G31730	AT1G09350	0.08677		AT3G02380	AT2G20750	0.074719		AT4G21440	AT1G10550	0.0808698
	AT2G24700	AT2G26180	0.0867495		AT2G46830	AT2G20750	0.066926		AT2G36270	AT1G10550	0.0730093
	AT2G38300	AT2G05440	0.0867358		AT1G26945	AT2G20750	0.0660362		AT3G02380	AT1G63710	0.080773
	AT3G24520	AT2G05440	0.0752181		AT2G46680	AT1G64110	0.0744338		AT5G46830	AT4G15990	0.0807493
	AT4G23810	AT3G55950	0.0867345		AT5G46830	AT1G64110	0.0661233		AT2G36270	AT4G15990	0.079115
	AT1G18570	AT3G55950	0.0747661		AT4G25480	AT5G02940	0.0742141		AT2G31730	AT5G15960	0.0807241
	AT1G18570	AT1G51790	0.0867187		AT2G22770	AT5G02940	0.0720525		AT3G02380	AT1G19960	0.0806415
	AT1G80840	AT5G27420	0.0866824		AT4G20970	AT5G02940	0.0652267		AT5G43290	AT1G19960	0.0746224
	AT1G06160	AT5G27420	0.0746466		AT5G56840	AT4G21215	0.0740422		AT2G28160	AT1G19960	0.0730776
	AT1G18570	AT1G08930	0.0866648		AT5G56840	AT1G12040	0.0738451		AT3G11580	AT5G13930	0.0805727
	AT4G23810	AT1G08930	0.0863938		AT4G20970	AT3G18773	0.0737316		AT4G09820	AT5G13930	0.0757067
	AT4G01720	AT1G08930	0.0743464		AT2G43000	AT3G48850	0.0737282		AT1G56650	AT4G32950	0.080473
	AT2G28500	AT5G08350	0.0864671		AT1G80840	AT3G48850	0.0732171		AT1G67970	AT4G23600	0.0804052
	AT4G09820	AT2G47560	0.0864637		AT1G06160	AT3G48850	0.0712971		AT3G58120	AT1G13609	0.0802818
	AT4G25480	AT2G47560	0.0823757		AT4G23810	AT3G48850	0.0692617		AT3G02380	AT5G25020	0.0802511
	AT3G54390	AT3G55660	0.0864295		AT5G24110	AT1G65500	0.0737132		AT5G67190	AT5G08350	0.0801674
	AT1G27730	AT2G38290	0.0863817		AT1G06160	AT1G65500	0.072433		AT2G28500	AT5G08350	0.0737933
	AT3G55980	AT2G38290	0.0755643		AT4G23810	AT1G65500	0.0714841		AT5G24110	AT5G19230	0.0801673
	AT2G38300	AT5G41040	0.0861412		AT5G05790	AT2G43375	0.0736869		AT4G37180	AT1G29660	0.0800678
	AT1G06160	AT5G41040	0.0781802		AT1G06160	AT2G47750	0.0735879		AT2G46270	AT1G29660	0.0729898
	AT4G01720	AT1G65484	0.0861307		AT4G36570	AT3G05640	0.0735867		AT4G09820	AT5G19190	0.0799879
	AT4G23810	AT1G65484	0.0822976		AT5G56840	AT3G05640	0.0719039		AT2G46270	AT2G06850	0.0798708
	AT1G18570	AT1G65484	0.0817021		AT1G26945	AT5G01740	0.0735468		AT4G09820	AT2G06850	0.0781082
	AT5G24110	AT1G65484	0.0802433		AT5G48250	AT5G01740	0.0687564		AT5G28770	AT5G62865	0.0797739
	AT5G61600	AT4G36040	0.0859955		AT5G61600	AT1G78460	0.0730984		AT1G01250	AT5G62865	0.0758999
	AT5G61590	AT4G36040	0.0755149		AT3G55980	AT1G78460	0.0635131		AT3G54390	AT2G28630	0.0797703
	AT3G55980	AT1G35210	0.0858441		AT1G80840	AT5G27420	0.0729267		AT2G43140	AT2G28630	0.0786559
	AT5G51190	AT1G35210	0.0824169		AT1G06160	AT5G27420	0.0656566		AT1G01250	AT2G28630	0.0767241
	AT1G27730	AT1G35210	0.0793707		AT5G24110	AT5G27420	0.0642633		AT5G28770	AT2G28630	0.07605
	AT4G25480	AT1G70270	0.0858012		AT5G47230	AT5G27420	0.063451		AT1G01250	AT2G33380	0.0796877
	AT4G37180	AT1G70270	0.0827057		AT4G01720	AT1G49000	0.0728584		AT3G54390	AT5G20250	0.079658
	AT4G09820	AT1G70270	0.0770922		AT1G19510	AT1G49000	0.0682318		AT5G28770	AT5G20250	0.0781369
	AT4G09820	AT3G29590	0.0857844		AT1G25560	AT3G28007	0.0728546		AT1G56650	AT5G20250	0.0751787
	AT4G09820	AT1G09500	0.0857433		AT1G68840	AT3G28007	0.0721254		AT3G58120	AT2G23010	0.0796493
	AT2G37260	AT1G09500	0.0814345		AT1G13260	AT3G28007	0.0646463		AT3G58120	AT4G04745	0.0796307
	AT2G28500	AT1G09500	0.0794669		AT1G16640	AT5G24510	0.0727865		AT2G36270	AT5G03210	0.0794354
	AT5G24110	AT5G02890	0.0857135		AT2G28500	AT1G17710	0.0726443		AT1G56650	AT5G03210	0.0705075
	AT2G26150	AT5G02890	0.0844405		AT2G46680	AT1G17710	0.0656632		AT2G47890	AT3G18485	0.0790839
	AT1G19510	AT5G02890	0.0734397		AT1G46480	AT1G17710	0.0626974		AT4G37180	AT3G03170	0.0790272
	AT5G59820	AT1G59540	0.0856402		AT5G51190	AT5G58650	0.0726217		AT2G28500	AT3G18773	0.079006
	AT5G67450	AT1G20070	0.0856218		AT1G46480	AT5G58650	0.0651301		AT5G67190	AT3G18773	0.0689623
	AT1G06160	AT1G20070	0.0793939		AT5G24110	AT1G65486	0.0726051		AT2G40750	AT5G39240	0.0787777
	AT4G09820	AT5G17220	0.0854427		AT3G11020	AT4G01670	0.072567		AT1G04990	AT1G27940	0.0787191
	AT2G23290	AT5G17220	0.079632		AT1G01250	AT2G45600	0.0724626		AT5G61590	AT1G01180	0.0786574
	AT2G24700	AT5G47500	0.0852876		AT2G28500	AT2G45600	0.0667698		AT3G54390	AT1G01180	0.0739699
	AT4G25480	AT1G03870	0.0851979		AT2G28500	AT4G37530	0.072246		AT4G17460	AT3G22750	0.0785969
	AT4G09820	AT1G03870	0.0845553		AT4G25480	AT4G37530	0.0699571		AT2G28160	AT3G22750	0.0780921
	AT4G37180	AT1G03870	0.0835974		AT2G29660	AT1G21890	0.0721736		AT2G36270	AT4G15440	0.0785487
	AT2G28500	AT2G47670	0.0850866		AT4G25480	AT3G05320	0.0720634		AT4G25480	AT3G50560	0.0783813
	AT4G01720	AT3G21080	0.0850383		AT2G46680	AT3G05320	0.0713248		AT4G37180	AT3G50560	0.0771266
	AT4G09820	AT4G22880	0.0850064		AT5G46830	AT3G05320	0.0684574		AT1G56650	AT5G19470	0.0783628
	AT3G24520	AT2G01610	0.0850057		AT5G56840	AT1G31690	0.0719996		AT4G09820	AT5G19470	0.0757005
	AT4G31620	AT2G01610	0.0732401		AT1G19510	AT5G48540	0.0719515		AT3G54390	AT1G02640	0.0783388
	AT5G24110	AT2G40670	0.0847241		AT5G24110	AT5G48540	0.0623787		AT5G28770	AT1G02640	0.070036
	AT4G09820	AT1G72430	0.0847142		AT5G51190	AT1G75040	0.0717926		AT5G61590	AT1G57990	0.0781879
	AT3G16770	AT1G72430	0.073056		AT1G06160	AT1G75040	0.0702556		AT5G03720	AT4G23990	0.0781475
	AT4G36570	AT5G43980	0.0847138		AT4G06746	AT1G75040	0.062821		AT2G43140	AT1G44800	0.0780713
	AT1G49560	AT5G43980	0.0731244		AT5G05790	AT1G14300	0.0717825		AT5G28770	AT1G44800	0.074663
	AT5G48250	AT2G48075	0.0846582		AT2G28160	AT1G14300	0.0650174		AT4G06746	AT3G15356	0.0780659
	AT3G02380	AT4G04330	0.0845595		AT5G48250	AT1G14300	0.0636309		AT1G68840	AT4G30460	0.0779706
	AT4G36570	AT4G04330	0.0819282		AT3G06160	AT1G54540	0.0717143		AT4G37180	AT4G30460	0.0684831
	AT2G26150	AT4G04330	0.0755445		AT1G06160	AT1G54540	0.0695064		AT3G26790	AT4G30460	0.068118
	AT2G31730	AT5G15960	0.0843722		AT3G05690	AT1G54540	0.0694326		AT3G62610	AT4G24010	0.0779644
	AT4G09820	AT2G37130	0.0842718		AT4G36570	AT1G54540	0.061949		AT2G23290	AT4G24010	0.0697681
	AT4G25480	AT2G37130	0.0729481		AT1G06160	AT3G05880	0.0716846		AT5G56780	AT5G48430	0.0779299
	AT1G18570	AT1G22890	0.0841566		AT4G01720	AT3G62150	0.0716588		AT4G36570	AT5G48430	0.0734638
	AT1G18570	AT3G57240	0.0840882		AT5G24110	AT3G62150	0.0658812		AT1G75250	AT5G48430	0.0705838
	AT4G01720	AT3G57240	0.0779896		AT4G06746	AT3G62150	0.0613199		AT3G16770	AT1G66180	0.0778864
	AT3G54390	AT2G30370	0.0838985		AT5G67190	AT3G54420	0.0716428		AT1G68840	AT1G80440	0.0777555
	AT2G23290	AT2G30370	0.0765454		AT3G09600	AT4G04330	0.0716006		AT5G61590	AT1G80440	0.07562
	AT4G31620	AT4G02290	0.083815		AT1G26945	AT4G04330	0.0687146		AT2G46270	AT3G16240	0.0776789
	AT5G61600	AT5G46780	0.0836136		AT3G51910	AT2G30010	0.0715923		AT4G09820	AT3G16240	0.0702767
	AT1G06160	AT5G57220	0.083599		AT2G43000	AT3G02840	0.0715662		AT4G37180	AT3G16240	0.0667828
	AT1G18570	AT5G57220	0.081678		AT4G23810	AT3G02840	0.0697968		AT5G61590	AT1G61930	0.0775208
	AT4G23810	AT5G57220	0.0803612		AT1G80840	AT3G02840	0.0662846		AT5G28770	AT1G61930	0.0763685
	AT5G24110	AT5G57220	0.0767277		AT5G04150	AT4G36850	0.0714166		AT4G09820	AT1G36940	0.077402
	AT4G01720	AT5G57220	0.0726139		AT5G61590	AT1G25400	0.0713725		AT2G36270	AT1G36940	0.0759715
	AT3G01600	AT2G37870	0.083523		AT4G23810	AT4G22690	0.0713012		AT4G36570	AT3G14440	0.0773611
	AT2G43000	AT1G68620	0.0834395		AT4G06746	AT4G22690	0.0685879		AT4G25490	AT3G14440	0.068419
	AT1G18570	AT3G21520	0.0830519		AT3G09600	AT3G12580	0.0711835		AT5G28770	AT3G25795	0.0773534
	AT4G23810	AT3G21520	0.0773077		AT3G11020	AT3G12580	0.0706065		AT4G09820	AT3G25795	0.0707676
	AT2G43000	AT3G21520	0.0719049		AT2G46830	AT3G12580	0.0638106		AT2G22770	AT2G04795	0.0772376
	AT4G09820	AT1G34580	0.0829708		AT1G68840	AT4G21120	0.0710032		AT3G02380	AT2G04795	0.0765616
	AT2G23290	AT1G34580	0.0726049		AT1G01250	AT4G21120	0.0643939		AT4G36570	AT2G04795	0.0736717
	AT4G23810	AT4G22690	0.0828565		AT2G46680	AT3G55940	0.070977		AT4G09820	AT3G12145	0.0770008
	AT2G37260	AT5G52250	0.0828037		AT2G03710	AT3G55940	0.0618708		AT4G36570	AT3G12145	0.0668991
	AT3G51910	AT5G52250	0.0788455		AT3G11020	AT1G12845	0.0709636		AT3G26790	AT2G20800	0.0769236
	AT2G22770	AT5G52250	0.0773925		AT1G06160	AT3G04720	0.0708917		AT5G43290	AT1G21250	0.0769206
	AT3G24520	AT2G18150	0.0826101		AT4G23810	AT3G04720	0.0628313		AT3G04420	AT3G28840	0.0768636
	AT2G38300	AT2G18150	0.0809371		AT5G05790	AT5G52640	0.0708751		AT2G31730	AT5G02550	0.0767759
	AT4G31620	AT2G18150	0.0808112		AT3G16770	AT5G52640	0.0678184		AT2G46270	AT4G37800	0.0767659
	AT5G24110	AT1G65486	0.0825909		AT5G67190	AT5G52640	0.0604461		AT4G37180	AT4G37800	0.0663042
	AT1G18570	AT2G40095	0.0825704		AT3G05690	AT2G15620	0.0708243		AT5G28770	AT2G16380	0.0766991
	AT4G23810	AT2G40095	0.0743045		AT2G29660	AT2G15620	0.0609839		AT3G54390	AT2G16380	0.0692967
	AT4G01720	AT5G14690	0.0822398		AT4G25480	AT3G51660	0.0708041		AT4G06746	AT2G16380	0.0653524
	AT5G24110	AT5G14690	0.0719689		AT4G20970	AT3G51660	0.0609598		AT3G16770	AT4G12690	0.0766275
	AT4G23810	AT5G14690	0.0703337		AT5G48250	AT5G54470	0.07074		AT4G09820	AT4G12690	0.0736224
	AT1G68840	AT5G25970	0.0820184		AT5G05790	AT5G54470	0.0680088		AT1G18330	AT3G23870	0.0764538
	AT1G13260	AT5G25970	0.0733623		AT3G11020	AT5G54470	0.0649147		AT3G11580	AT3G23870	0.0760015
	AT5G46830	AT3G27250	0.0817269		AT2G40750	AT5G54470	0.0629412		AT2G40750	AT5G03350	0.0764099
	AT4G01720	AT2G39210	0.081654		AT1G46480	AT1G12100	0.0702498		AT2G31730	AT1G09350	0.0763307
	AT1G18570	AT2G39210	0.0785287		AT4G23810	AT4G01750	0.0702215		AT3G02990	AT3G29575	0.0762967
	AT5G24110	AT2G39210	0.0700136		AT4G01720	AT4G01750	0.0610313		AT5G46830	AT3G29575	0.0691128
	AT2G22800	AT5G59080	0.0815085		AT5G51190	ATCG00170	0.0696803		AT1G56650	AT5G24780	0.0762287
	AT3G54390	AT5G59080	0.0741824		AT5G61590	AT3G26510	0.0696272		AT2G31730	AT5G24780	0.0694289
	AT5G61590	AT5G59080	0.071379		AT5G61600	AT1G72940	0.0696238		AT1G04990	AT5G24780	0.0672427
	AT1G80840	AT5G22250	0.08149		AT1G46480	AT2G38940	0.06947		AT1G68840	AT3G28007	0.076222
	AT5G59820	AT2G40955	0.0813212		AT1G26945	AT3G24420	0.0694384		AT5G67190	AT3G28007	0.0704591
	AT4G25480	AT5G48570	0.0813195		AT2G29660	AT3G24420	0.0647962		AT3G16770	AT3G28007	0.0684013
	AT4G36570	AT5G48570	0.0801287		AT5G46830	AT1G65845	0.0693505		AT4G36570	AT5G43890	0.0761815
	AT2G28500	AT5G48570	0.0736445		AT4G25480	AT1G65845	0.06905		AT2G22770	AT5G43890	0.0680723
	AT3G16770	AT5G48570	0.0713398		AT2G46680	AT1G65845	0.0621865		AT3G02380	AT5G43890	0.0672072
	AT1G19510	AT5G48540	0.0811155		AT4G39250	AT1G65845	0.062038		AT1G56650	AT4G03460	0.0761214
	AT1G19510	AT2G42540	0.0811148		AT3G11020	AT1G16390	0.0693419		AT5G25390	AT4G03460	0.0733478
	AT5G24110	AT2G42540	0.0799915		AT5G46830	AT1G16390	0.0677311		AT1G75250	AT4G03460	0.0707989
	AT4G01720	AT2G42540	0.0772793		AT3G51910	AT1G16390	0.0673277		AT4G36570	AT4G18440	0.076087
	AT3G24520	AT1G53860	0.0808581		AT2G28160	AT1G16390	0.0617064		AT2G46270	AT5G15350	0.0760777
	AT1G19510	AT1G53860	0.0705925		AT3G51910	AT4G16590	0.0693251		AT2G46680	AT1G55760	0.0760683
	AT4G09820	AT2G40330	0.0808132		AT2G46680	AT4G16590	0.0630261		AT2G28500	AT1G55760	0.074655
	AT5G46830	AT2G40330	0.079609		AT3G16770	AT3G21351	0.0692254		AT2G36270	AT1G55760	0.0697576
	AT2G46680	AT2G40330	0.0775196		AT4G25480	AT3G21351	0.0663399		AT1G66230	AT1G60190	0.0760114
	AT3G51910	AT2G40330	0.0752525		AT2G46680	AT3G21351	0.0643462		AT1G18710	AT1G60190	0.0702668
	AT4G25480	AT2G40330	0.070497		AT1G13260	AT3G21351	0.0616186		AT4G36570	AT4G36410	0.0759149
	AT4G01720	AT4G00970	0.0806815		AT4G17460	AT3G21351	0.0601715		AT4G36570	AT1G16410	0.0759063
	AT4G25480	AT4G19380	0.080651		AT4G36570	AT2G39920	0.069223		AT2G46680	AT1G18870	0.075827
	AT4G37180	AT4G19380	0.0693916		AT3G02380	AT2G39920	0.0615222		AT2G46680	AT2G41190	0.0758079
	AT5G46830	AT5G54710	0.080304		AT2G29660	AT5G18065	0.069119		AT4G25480	AT5G44130	0.0754578
	AT2G38300	AT5G54710	0.0745171		AT2G46830	AT5G18065	0.066988		AT2G46270	AT5G44130	0.068522
	AT1G68840	AT3G28007	0.0802033		AT2G22800	AT5G44585	0.0688847		AT4G37180	AT5G44130	0.0656214
	AT3G01600	AT3G28007	0.071972		AT1G01250	AT5G44585	0.0597575		AT5G67190	AT5G61440	0.0753166
	AT1G25560	AT3G28007	0.0699752		AT3G51910	AT5G44585	0.0593575		AT1G18330	AT5G61440	0.0712513
	AT5G61590	AT3G26200	0.0801313		AT1G13260	AT5G64190	0.0687511		AT5G43290	AT3G57640	0.0751637
	AT4G06746	AT3G26200	0.0687626		AT2G29660	AT1G24470	0.0687033		AT5G25390	AT3G57640	0.074617
	AT4G09820	AT4G17870	0.0798234		AT4G36570	AT1G24470	0.0588033		AT3G11580	AT3G57640	0.0734821
	AT2G23290	AT4G17870	0.07285		AT5G05790	AT3G29670	0.0686526		AT5G25390	AT1G72140	0.0749957
	AT3G51910	AT4G17870	0.0702118		AT2G22800	AT2G04170	0.0685968		AT2G46270	AT1G72140	0.0711603
	AT2G31730	AT5G64120	0.0797844		AT4G23810	AT2G26020	0.0685052		AT3G54390	AT1G12672	0.0749201
	AT1G06160	AT3G04720	0.0796846		AT2G28500	AT1G28660	0.0681802		AT3G16770	AT1G12672	0.0649167
	AT1G18570	AT3G04720	0.0788042		AT3G11020	AT1G28660	0.0677208		AT3G11580	AT3G42800	0.0748584
	AT5G47230	AT4G27480	0.0796135		AT4G25480	AT1G28660	0.0600772		AT1G75250	AT3G42800	0.0720715
	AT1G27730	AT4G27480	0.0688756		AT4G36570	AT5G15960	0.0680845		AT1G56650	AT3G28290	0.0747373
	AT5G51190	AT4G27480	0.0680744		AT5G56840	AT5G15960	0.0652095		AT4G09820	AT3G28290	0.0713299
	AT2G46680	AT1G64110	0.079494		AT2G22770	AT1G44800	0.0679747		AT4G37180	AT3G28290	0.0656027
	AT2G28500	AT1G64110	0.0713892		AT2G40750	AT3G05660	0.0679497		AT4G37180	AT4G33220	0.0747183
	AT2G24700	AT3G01710	0.0793686		AT3G09600	AT3G54580	0.0678451		AT4G09820	AT4G33220	0.0641586
	AT3G54390	AT1G01180	0.0792504		AT1G16640	AT3G54580	0.066898		AT3G11580	AT1G58190	0.0746971
	AT5G61590	AT1G01180	0.0717601		AT5G47230	AT1G19200	0.0677617		AT3G54390	AT1G58190	0.0724942
	AT5G67190	AT4G37690	0.0791362		AT1G25560	AT1G19200	0.0595201		AT4G09820	AT4G10950	0.0744862
	AT1G80840	AT2G29720	0.0789521		AT5G56840	AT4G01390	0.0676837		AT3G51910	AT4G10950	0.073301
	AT5G24110	AT2G29720	0.0742665		AT4G17490	AT4G01390	0.0575784		AT4G09820	AT1G22530	0.0744514
	AT3G55980	AT2G29720	0.0739364		AT2G46680	AT3G28220	0.0675735		AT2G46270	AT1G22530	0.0736621
	AT5G67450	AT3G21770	0.0789397		AT4G06746	AT1G52270	0.0675504		AT5G28770	AT5G37940	0.0743706
	AT4G31620	AT3G21770	0.0772924		AT5G61590	AT1G52270	0.0591463		AT1G75250	AT5G37940	0.0674777
	AT2G38300	AT3G21770	0.0752272		AT4G39780	AT4G19460	0.067491		AT5G28770	AT1G57590	0.074346
	AT1G06160	AT1G78460	0.07893		AT2G40750	AT1G02205	0.0674789		AT1G66230	AT3G50800	0.0742844
	AT5G61600	AT1G78460	0.0712533		AT4G36570	AT1G02205	0.0586651		AT3G51910	AT3G50800	0.0713162
	AT1G18710	AT3G28220	0.078709		AT3G04420	AT1G02205	0.0585092		AT1G56650	AT1G76690	0.0742732
	AT2G23290	AT3G28220	0.077479		AT5G24110	AT2G42530	0.0673753		AT4G09820	AT2G38620	0.0742659
	AT4G25480	AT2G21650	0.0785452		AT1G80840	AT2G42530	0.0649813		AT2G23290	AT2G38620	0.0713847
	AT2G46680	AT2G21650	0.068668		AT4G01720	AT2G42530	0.0625843		AT3G16770	AT1G11545	0.0742354
	AT5G61590	AT4G17245	0.0785439		AT4G23810	AT2G42530	0.0576215		AT2G46270	AT1G11545	0.0717558
	AT2G22800	AT4G17245	0.0714547		AT1G06160	AT5G46780	0.067335		AT2G46680	AT4G13195	0.0741383
	AT4G23810	AT1G67810	0.0782404		AT3G55980	AT5G46780	0.0669108		AT1G56650	AT4G13195	0.0660933
	AT1G06160	AT1G67810	0.0757163		AT5G61590	AT5G46780	0.0655443		AT4G09820	AT4G13195	0.0638016
	AT2G43000	AT1G67810	0.069098		AT5G61600	AT5G46780	0.064859		AT1G68840	AT1G26800	0.0739315
	AT1G27730	AT1G67810	0.0675037		AT4G01720	AT4G33550	0.0673304		AT2G46270	AT3G25770	0.0738453
	AT3G54390	AT5G28630	0.0782259		AT4G36570	AT5G48485	0.0673101		AT1G68840	AT4G21120	0.0738251
	AT5G67450	AT5G38020	0.0778474		AT1G80840	AT2G29720	0.0672721		AT5G67190	AT3G22550	0.0735712
	AT3G24520	AT5G38020	0.0668048		AT5G24110	AT2G29720	0.0640326		AT4G17460	AT4G34790	0.0735671
	AT3G01600	AT4G01985	0.0777774		AT2G37430	AT2G29720	0.0619313		AT1G19510	AT5G01550	0.0735451
	AT3G01600	AT2G38940	0.0774653		AT3G55980	AT2G29720	0.0594472		AT4G25490	AT5G01550	0.0698702
	AT4G37180	AT5G11320	0.077453		AT4G01720	AT3G16150	0.0672079		AT1G18710	AT5G01550	0.0698409
	AT5G46830	AT1G30720	0.0772679		AT4G39780	AT4G11290	0.0671463		AT5G24110	AT5G01550	0.0659576
	AT2G31730	AT1G30720	0.0750638		AT1G68840	AT4G11290	0.0589469		AT4G09820	AT1G65310	0.0733412
	AT5G61600	AT2G36950	0.0771795		AT2G22770	AT4G11290	0.0574166		AT4G25480	AT1G65310	0.0713729
	AT4G06746	AT2G36950	0.0678513		AT5G46830	AT4G21870	0.0671406		AT4G36570	AT1G65310	0.0691536
	AT4G01720	AT5G45920	0.0771692		AT3G51910	AT4G21870	0.0639539		AT2G46270	AT1G65310	0.0663644
	AT5G48250	AT5G01740	0.0771216		AT2G22800	AT1G57990	0.0669485		AT3G11020	AT1G65310	0.0626821
	AT3G16770	AT2G34190	0.0771084		AT5G61590	AT1G57990	0.0656138		AT2G46270	AT1G62480	0.0732858
	AT5G61590	AT2G34190	0.0710135		AT3G51910	AT1G57990	0.0616282		AT4G37180	AT1G62480	0.0715722
	AT2G22800	AT2G34190	0.0704651		AT4G06746	AT1G57990	0.0592241		AT4G09820	AT1G62480	0.064347
	AT3G54390	AT2G34190	0.0668118		AT1G06160	AT2G25735	0.0668582		AT1G75250	AT1G51850	0.0731544
	AT3G16770	AT5G03350	0.0770644		AT5G61590	AT2G25735	0.0600346		AT1G75250	AT1G04660	0.0731259
	AT1G18570	AT3G15356	0.0769229		AT4G06746	AT2G25735	0.0596253		AT3G11580	AT1G04660	0.0721408
	AT1G06160	AT3G15356	0.0729303		AT2G22800	AT5G44572	0.0667607		AT1G18710	AT5G48540	0.0730531
	AT4G06746	AT3G15356	0.0683809		AT3G04420	AT5G44572	0.0630289		AT1G19510	AT5G48540	0.073035
	AT2G22770	AT5G43890	0.0769004		AT2G40750	AT1G31350	0.0666822		AT4G25490	AT5G48540	0.069673
	AT3G02380	AT5G43890	0.0726428		AT1G29860	AT1G31350	0.066647		AT5G24110	AT5G48540	0.0642737
	AT4G36570	AT5G43890	0.0726126		AT3G04420	AT1G31350	0.0592288		AT2G46270	AT1G76960	0.0727276
	AT1G19510	AT4G30700	0.0767569		AT5G51190	AT1G31350	0.0567175		AT2G28500	AT5G15500	0.0725833
	AT5G24110	AT4G30700	0.0711176		AT1G68840	AT5G55950	0.0666798		AT2G46680	AT5G15500	0.068629
	AT1G06160	AT4G27300	0.0767372		AT4G20970	AT3G03341	0.0666694		AT2G28500	AT2G47670	0.0725513
	AT2G46680	AT2G41190	0.0766939		AT2G22770	AT3G03341	0.0607675		AT1G01250	AT2G47670	0.0689794
	AT2G46680	AT3G55940	0.0766893		AT5G67190	AT1G36940	0.0666522		AT5G05790	AT2G25470	0.0725428
	AT4G36570	AT3G14440	0.0765718		AT4G25480	AT1G36940	0.0637506		AT4G37180	AT1G70270	0.0724836
	AT5G46830	AT3G14440	0.0747168		AT1G13260	AT1G36940	0.0573052		AT2G46270	AT1G70270	0.0679292
	AT2G46680	AT3G14440	0.0709561		AT1G16640	AT1G71400	0.0665064		AT4G09820	AT1G70270	0.0672101
	AT3G51910	AT5G59320	0.0763748		AT1G01250	AT1G71400	0.0659358		AT4G25480	AT1G70270	0.0632287
	AT2G22770	AT5G59320	0.0762271		AT4G01720	AT1G71400	0.0587475		AT4G06746	AT2G44480	0.0724339
	AT1G13260	AT3G60900	0.0763385		AT1G46480	AT4G37610	0.0663034		AT5G61590	AT2G44480	0.0709068
	AT2G22800	AT5G44572	0.0763068		AT2G28500	AT4G37610	0.0619461		AT1G19510	AT2G44480	0.0619202
	AT5G24110	AT5G44572	0.0676332		AT5G47230	AT2G26010	0.0660051		AT2G46680	AT2G40330	0.072425
	AT3G02380	AT5G44572	0.0659432		AT4G36570	AT4G18440	0.0659763		AT4G09820	AT5G05270	0.0723602
	AT2G22800	AT2G04170	0.076215		AT1G26945	AT4G18440	0.0583852		AT1G68840	AT5G05270	0.0718077
	AT4G23810	AT1G66960	0.0761152		AT1G06160	AT2G36950	0.0657123		AT4G06746	AT5G05270	0.0664024
	AT1G06160	AT1G66960	0.0683724		AT1G06160	AT4G27300	0.0655903		AT4G37180	AT5G05270	0.064195
	AT5G47230	AT1G66960	0.0677656		AT5G47230	AT4G27300	0.0607853		AT4G06746	AT1G22890	0.0722832
	AT5G24110	AT2G26695	0.076078		AT5G46830	AT3G52480	0.0655733		AT5G05790	AT5G49320	0.072217
	AT3G02380	AT2G26695	0.0736564		AT3G11020	AT3G52480	0.0614861		AT5G67190	AT4G28290	0.0721649
	AT4G36570	AT2G26695	0.0718691		AT2G28160	AT3G52480	0.0585559		AT3G62610	AT3G09780	0.072136
	AT2G26150	AT2G26695	0.0697329		AT4G36570	AT4G12500	0.0655427		AT3G11580	AT3G09780	0.0684572
	AT4G36570	AT4G18440	0.0756984		AT3G09600	AT4G12500	0.0598295		AT2G36270	AT3G09330	0.0720691
	AT4G09820	AT1G76790	0.0756468		AT4G20970	AT2G40000	0.0655164		AT5G46830	AT3G09330	0.0679432
	AT2G23290	AT1G76790	0.0701979		AT2G28500	AT2G40000	0.0611366		AT2G46680	AT5G15190	0.0720334
	AT2G37260	AT1G76790	0.0647481		AT1G46480	AT2G40000	0.0580378		AT2G28500	AT5G15190	0.0643526
	AT2G28500	AT4G30610	0.0756063		AT3G04420	AT3G51450	0.0653503		AT1G56650	AT3G15450	0.0719374
	AT2G46680	AT4G30610	0.068259		AT1G01250	AT1G78070	0.0652587		AT1G66230	AT3G15450	0.070856
	AT4G37180	AT4G30610	0.0665501		AT3G06160	AT2G48140	0.065151		AT2G46270	AT2G36830	0.0718462
	AT3G54390	AT2G28790	0.0754536		AT3G05690	AT2G48140	0.0630373		AT3G16770	AT2G36830	0.0627353
	AT2G22800	AT2G28790	0.0669844		AT1G06160	AT2G48140	0.0620475		AT4G25480	AT2G36830	0.0621584
	AT2G37260	AT4G37610	0.075215		AT3G02380	AT1G79450	0.0650364		AT4G09820	AT3G06070	0.0718196
	AT4G20970	AT4G37610	0.0681371		AT4G36570	AT1G79450	0.0584286		AT2G23290	AT3G06070	0.0660419
	AT1G25560	AT1G13245	0.0750552		AT2G46680	AT2G41190	0.0649252		AT4G21440	AT5G06540	0.0717758
	AT1G27730	AT1G13245	0.0747609		AT5G46830	AT2G41190	0.0552525		AT4G24150	AT5G06540	0.0656429
	AT5G61600	AT1G13245	0.0664963		AT5G05790	AT4G19430	0.0647876		AT2G46680	AT5G50360	0.0717698
	AT5G61590	AT1G13245	0.0642617		AT1G26945	AT4G19430	0.0634461		AT3G06160	AT3G50480	0.0712004
	AT1G06160	AT1G13245	0.0638316		AT5G48250	AT4G19430	0.0618735		AT2G28500	AT5G66400	0.0711811
	AT4G01720	AT3G16420	0.0748153		AT3G05690	AT3G62960	0.0647578		AT2G46680	AT5G66400	0.0665697
	AT1G18570	AT3G16420	0.0692913		AT2G28160	AT3G62960	0.0628334		AT1G01250	AT5G66400	0.0645208
	AT4G23810	AT3G16420	0.0692377		AT4G23810	AT1G20450	0.0647019		AT4G36570	AT2G22470	0.071083
	AT2G43000	AT3G16420	0.0691622		AT5G56840	AT1G20450	0.060385		AT2G31730	AT2G22470	0.0672467
	AT5G61590	AT4G04955	0.0747844		AT5G24110	AT1G20450	0.0598805		AT3G02990	AT2G22470	0.066849
	AT4G06746	AT4G04955	0.0704065		AT4G01720	AT1G20450	0.0569913		AT3G06160	AT2G22470	0.0656753
	AT5G67190	AT4G28290	0.0747095		AT5G48250	AT4G32480	0.0646622		AT4G06746	AT2G22470	0.064612
	AT3G02380	AT4G16146	0.0746847		AT5G67190	AT4G28290	0.0646078		AT3G04420	AT5G44572	0.0710641
	AT2G26150	AT4G16146	0.0704275		AT5G48250	AT3G17890	0.0644636		AT5G24110	AT5G44572	0.0687479
	AT4G36570	AT4G16146	0.0701022		AT2G40750	AT3G17890	0.0598284		AT5G28770	AT5G44572	0.0615201
	AT2G31730	AT1G06830	0.0746472		AT5G05790	AT3G17890	0.0549757		AT4G17460	AT4G34770	0.0710546
	AT2G38300	AT1G06830	0.0678803		AT5G61600	AT5G21940	0.0643797		AT1G73830	AT4G34770	0.0704833
	AT2G23290	AT1G06830	0.067195		AT3G51910	AT4G23600	0.0643321		AT1G18330	AT4G34770	0.0681876
	AT2G46680	AT1G06830	0.0645042		AT2G40750	AT4G23600	0.0577616		AT1G67970	AT1G57750	0.0708035
	AT2G26150	AT2G43375	0.0745126		AT4G17500	AT4G25433	0.0641648		AT1G04990	AT1G57750	0.0663088
	AT3G02380	AT2G43375	0.0674463		AT4G17490	AT3G10120	0.0639955		AT3G51910	AT1G57750	0.065594
	AT4G36570	AT2G43375	0.0636544		AT1G27730	AT3G10120	0.0622436		AT1G04990	AT1G02650	0.0707849
	AT4G25480	AT2G30930	0.0742656		AT5G47230	AT3G10120	0.0599869		AT2G46680	AT1G02650	0.0641817
	AT2G46680	AT2G30930	0.065269		AT2G46680	AT3G50970	0.0638663		AT2G31730	AT5G64120	0.0706496
	AT5G61600	AT2G36970	0.0740119		AT2G28500	AT3G50970	0.0573421		AT5G67411	AT1G61795	0.070643
	AT1G06160	AT2G36970	0.0661993		AT5G51190	ATCG00180	0.0635955		AT2G46270	AT5G57560	0.0706403
	AT4G09820	AT3G06070	0.0739547		AT1G06160	ATCG00180	0.0595503		AT3G16770	AT5G57560	0.0664804
	AT2G23290	AT3G06070	0.0685018		AT1G68840	ATCG00180	0.0558306		AT2G47890	AT3G47750	0.0705269
	AT5G24110	AT3G22060	0.073863		AT1G64380	AT1G77660	0.0635293		AT4G37180	AT3G47750	0.0655428
	AT1G18570	AT3G22060	0.069459		AT4G06746	AT1G77660	0.0594157		AT5G46830	AT5G40800	0.0704648
	AT4G23810	AT3G22060	0.0689008		AT3G05690	AT2G18196	0.0632624		AT1G18710	AT5G40800	0.0620374
	AT4G01720	AT3G22060	0.0685775		AT5G67190	AT2G18196	0.0606522		AT4G25480	AT5G40800	0.0617649
	AT5G67190	AT2G20560	0.0737441		AT2G29660	AT2G18196	0.0597626		AT1G66230	AT4G17245	0.0704335
	AT1G06160	AT4G19230	0.0737331		AT3G02380	AT2G18196	0.0587899		AT5G28770	AT4G17245	0.0678056
	AT1G49560	AT4G19230	0.0674038		AT2G46830	AT2G18196	0.054427		AT5G61590	AT4G17245	0.067146
	AT2G26150	AT5G52640	0.0736723		AT4G20970	AT5G56550	0.0631761		AT1G56650	AT4G17245	0.0666838
	AT1G80840	AT3G05640	0.0733778		AT1G46480	AT5G56550	0.0581118		AT3G51910	AT4G17245	0.0663994
	AT4G36570	AT3G05640	0.0710495		AT5G61600	AT2G39705	0.0630434		AT4G09820	AT3G51450	0.0703979
	AT5G67190	AT1G07050	0.0730495		AT3G02380	AT4G15430	0.0630018		AT2G23290	AT1G76790	0.0703021
	AT2G22800	AT3G24420	0.0727581		AT2G29660	AT4G15430	0.0611937		AT4G09820	AT1G76790	0.0642922
	AT4G25480	AT5G52882	0.0727553		AT2G40750	AT4G15430	0.0588091		AT4G36570	AT1G51820	0.0702666
	AT2G46680	AT5G52882	0.0668434		AT1G80840	AT1G04980	0.0629733		AT2G22770	AT1G51820	0.0635631
	AT3G54390	AT1G04425	0.07269		AT1G62975	AT1G04980	0.056179		AT5G03720	AT3G50760	0.0702255
	AT2G22800	AT1G04425	0.0664106		AT4G23810	AT1G04980	0.0547543		AT1G01250	AT3G50760	0.0607718
	AT5G61590	AT1G04425	0.0642555		AT5G48250	AT2G05380	0.0624026		AT3G26790	AT4G23210	0.0699751
	AT3G16770	AT1G04425	0.0620098		AT1G68840	AT5G15330	0.0622772		AT3G54390	AT1G33770	0.0696976
	AT1G18710	AT3G62950	0.0726838		AT5G61600	AT5G15330	0.0589889		AT4G06746	AT1G33770	0.0669021
	AT4G09820	AT4G23400	0.0725623		AT2G29660	AT1G70640	0.0621293		AT2G36270	AT4G14380	0.069639
	AT4G09820	AT1G24070	0.0725258		AT4G25480	AT1G70640	0.061909		AT5G28770	AT5G04190	0.0695401
	AT5G67190	AT1G24070	0.0660952		AT2G28500	AT1G70640	0.0572866		AT5G61590	AT5G04190	0.0632964
	AT1G18710	AT1G24070	0.0652392		AT5G05790	AT1G70640	0.0548455		AT4G06746	AT5G04190	0.0603544
	AT4G37180	AT3G24515	0.0724054		AT2G22770	AT1G70640	0.0543611		AT2G28500	AT1G02390	0.0695049
	AT1G18710	AT4G23990	0.0719647		AT1G06160	AT2G34960	0.0621014		AT2G47890	AT1G02390	0.0682566
	AT1G13260	AT4G23990	0.0635611		AT2G40750	AT1G08650	0.0620441		AT4G17460	AT4G08570	0.0694568
	AT1G06160	AT2G35930	0.0718924		AT3G02380	AT1G08650	0.0614651		AT1G56650	AT4G08570	0.0686305
	AT1G06160	AT2G43590	0.0718411		AT2G29660	AT1G08650	0.0566405		AT4G09820	AT4G08570	0.0639021
	AT5G24110	AT2G43590	0.0628644		AT4G25480	AT1G78430	0.0617754		AT1G18710	AT4G08570	0.0614754
	AT2G28500	AT1G65490	0.0717316		AT2G03710	AT1G78430	0.0552016		AT3G58120	AT4G08570	0.0613443
	AT3G55980	AT2G25735	0.0716355		AT1G25560	AT1G13245	0.0617487		AT2G40750	AT3G05660	0.0692783
	AT4G23810	AT2G25735	0.0714787		AT1G62975	AT1G13245	0.0584599		AT2G47890	AT3G05660	0.062319
	AT1G06160	AT2G25735	0.067914		AT1G27730	AT1G13245	0.0537548		AT2G46680	AT1G64110	0.0692045
	AT4G01720	AT3G16150	0.0714698		AT4G17490	AT1G13245	0.0535207		AT5G46830	AT1G64110	0.0685699
	AT5G46830	AT4G11460	0.0713239		AT4G25480	AT3G09260	0.0614027		AT1G01250	AT1G64110	0.0609966
	AT5G61590	AT3G15630	0.0712347		AT2G22770	AT3G09260	0.0549842		AT2G40750	AT1G02205	0.0691838
	AT3G51910	AT3G15630	0.0671438		AT5G46830	AT2G40130	0.0610729		AT2G26150	AT1G02205	0.069146
	AT4G06746	AT3G15630	0.0628907		AT5G67190	AT2G20560	0.0609551		AT2G46680	AT5G59220	0.0691149
	AT1G25560	AT4G26950	0.0711916		AT2G28500	AT2G20560	0.0518493		AT2G28500	AT5G59220	0.0662052
	AT5G47230	AT4G26950	0.0638665		AT2G28500	AT1G16850	0.0608921		AT3G51910	AT3G06080	0.0690594
	AT2G46680	AT5G64570	0.0711865		AT3G02380	AT4G16146	0.0608215		AT5G46830	AT3G06080	0.0652693
	AT2G37260	AT5G64570	0.0703137		AT1G46480	AT4G01985	0.0606345		AT2G46680	AT3G06080	0.0605213
	AT4G25480	AT5G64570	0.0696781		AT5G51190	AT4G01985	0.0522458		AT1G67970	AT2G47560	0.0689949
	AT1G13260	AT5G64570	0.0691973		AT1G19510	AT2G25470	0.0604135		AT4G25480	AT2G47560	0.0683519
	AT3G51910	AT5G64570	0.066879		AT1G25560	AT4G26950	0.0599299		AT4G09820	AT2G47560	0.0628437
	AT3G51910	AT1G17190	0.0710986		AT1G06160	AT4G26950	0.0523805		AT2G46270	AT2G47560	0.060565
	AT1G68840	AT4G19820	0.0710041		AT4G06746	AT4G26950	0.0512782		AT1G75250	AT3G52360	0.0689487
	AT4G36570	AT1G33440	0.0709775		AT4G01720	AT4G30460	0.0598464		AT3G16770	AT5G47060	0.0688698
	AT5G24110	AT1G33440	0.065603		AT1G06160	AT4G30460	0.0571938		AT3G54390	AT5G47060	0.0654739
	AT2G26150	AT1G33440	0.0619494		AT1G68840	AT4G30460	0.0521617		AT2G40750	AT5G52320	0.0688353
	AT3G02380	AT1G33440	0.0605378		AT1G06160	AT3G26840	0.0596336		AT5G43290	AT5G52320	0.0684613
	AT4G09820	AT5G05270	0.0707339		AT2G03710	AT3G26840	0.0561963		AT3G02380	AT5G52320	0.0677948
	AT1G68840	AT5G05270	0.0645277		AT1G25560	AT3G19030	0.0595071		AT1G56650	AT4G16590	0.068725
	AT4G06746	AT1G57990	0.0707289		AT1G62975	AT3G19030	0.0553033		AT4G09820	AT4G16590	0.0623181
	AT4G37180	AT5G23480	0.070463		AT5G48250	AT3G19030	0.0512278		AT5G24110	AT4G00970	0.0686594
	AT2G26150	AT5G23480	0.0668466		AT1G46480	AT3G19030	0.0507439		AT1G19510	AT4G00970	0.0603539
	AT3G11020	AT5G23480	0.0661197		AT1G06160	AT1G31173	0.0588864		AT2G36270	AT1G73210	0.0685697
	AT4G25480	AT5G23480	0.0625425		AT5G56840	AT1G31173	0.0555998		AT2G28500	AT1G73210	0.0653167
	AT3G02380	AT1G31690	0.070431		AT4G36570	AT1G31173	0.0534274		AT1G75250	AT1G73210	0.0589158
	AT2G26150	AT1G31690	0.0632614		AT3G51910	AT5G16570	0.0586988		AT1G18330	AT4G37690	0.0685238
	AT4G36570	AT1G31690	0.0600668		AT2G46680	AT5G16570	0.0572076		AT4G17460	AT4G37690	0.0651654
	AT1G49560	AT3G52480	0.0703789		AT1G01250	AT5G16570	0.0558963		AT2G46680	AT1G15310	0.0684727
	AT4G25480	AT1G62380	0.0703643		AT4G39250	AT5G16570	0.053906		AT1G75250	AT1G15310	0.0602199
	AT3G16770	AT1G62380	0.0634101		AT4G36570	AT5G64120	0.0586603		AT1G56650	AT1G20490	0.0684465
	AT2G23290	AT1G62380	0.0599679		AT2G46680	AT5G64120	0.0559458		AT2G31730	AT1G63720	0.0684199
	AT3G54390	AT5G40450	0.0701609		AT4G39250	AT5G64120	0.0554183		AT3G02380	AT1G63720	0.0649525
	AT4G06746	AT5G40450	0.0618997		AT5G46830	AT5G64120	0.0550299		AT4G37180	AT1G75750	0.0684104
	AT1G18570	AT5G40450	0.0612652		AT4G25480	AT5G64120	0.0507819		AT3G16770	AT1G75750	0.0674637
	AT5G46830	AT3G03170	0.070154		AT3G11020	AT5G64120	0.0506027		AT2G26150	AT1G75750	0.0651789
	AT3G24520	AT3G03170	0.0670696		AT2G28500	AT3G06500	0.0584072		AT5G56780	AT1G75750	0.0603338
	AT4G37180	AT3G03170	0.0637592		AT2G40750	AT5G62720	0.0582604		AT4G09820	AT2G43530	0.0682457
	AT2G24700	AT1G20160	0.0701433		AT1G26945	AT5G62720	0.0578661		AT1G56650	AT2G36750	0.068072
	AT4G37180	AT1G20160	0.0606771		AT3G02380	AT3G05650	0.0582603		AT5G25390	AT2G36750	0.0641122
	AT4G09820	AT2G35760	0.0700772		AT3G51910	AT3G16660	0.0582232		AT2G36270	AT2G36750	0.0616473
	AT3G16770	AT2G35760	0.0642016		AT5G46830	AT2G38310	0.0581135		AT1G19510	AT2G19190	0.0680106
	AT5G46830	AT5G09440	0.069966		AT4G25480	AT2G38310	0.0567774		AT2G46680	AT3G58850	0.0679998
	AT1G49560	AT5G09440	0.0677095		AT4G39250	AT2G38310	0.056372		AT2G23290	AT3G58850	0.0624771
	AT2G26150	AT5G09440	0.0626504		AT1G46480	AT2G37870	0.058107		AT1G04990	AT3G58850	0.0602978
	AT1G68840	AT4G21120	0.0698476		AT4G17500	AT2G37870	0.0565022		AT4G37180	AT3G58850	0.0594359
	AT5G61590	AT5G14730	0.0698083		AT2G46680	AT1G53100	0.0579898		AT2G46270	AT3G45970	0.0679631
	AT1G06160	AT5G14730	0.0681272		AT5G61600	AT4G27520	0.057712		AT4G25480	AT3G30775	0.0677709
	AT4G06746	AT5G14730	0.0615378		AT1G06160	AT4G27520	0.0513275		AT5G46830	AT3G30775	0.0673962
	AT4G36570	AT1G31173	0.0694593		AT3G06160	AT1G59960	0.0576687		AT3G51910	AT3G30775	0.0663427
	AT1G06160	AT1G31173	0.0613644		AT1G06160	AT1G59960	0.0571452		AT1G56650	AT3G30775	0.0592429
	AT1G49560	AT1G14200	0.0692334		AT1G25560	AT1G59960	0.0568283		AT2G36270	AT3G45140	0.0676454
	AT3G51910	AT1G14200	0.0690225		AT1G64380	AT1G59960	0.0536059		AT1G75250	AT3G45140	0.0595072
	AT3G11020	AT1G14200	0.0682665		AT5G47230	AT1G59960	0.0520114		AT4G17460	AT4G26270	0.0675795
	AT5G46830	AT1G14200	0.0636216		AT5G67190	AT5G24470	0.0573093		AT2G47890	AT2G37580	0.067516
	AT3G01600	AT1G01600	0.0690925		AT4G39780	AT4G31910	0.0572812		AT2G40750	AT2G37580	0.0611504
	AT2G24700	AT1G01600	0.0627957		AT5G46830	AT1G68440	0.0566822		AT1G67970	AT2G37580	0.0575748
	AT4G06746	AT1G75040	0.069071		AT4G25480	AT1G68440	0.0506132		AT4G37180	AT1G20160	0.0675132
	AT3G55980	AT1G75040	0.0675314		AT3G02380	AT2G26695	0.0565702		AT4G09820	AT1G23030	0.0674237
	AT1G06160	AT1G75040	0.0642357		AT4G36570	AT2G26695	0.0493661		AT2G46270	AT1G23030	0.0673563
	AT4G23810	AT1G75040	0.0625018		AT3G04420	AT2G26695	0.0493562		AT3G11020	AT4G37450	0.0671536
	AT5G61600	AT1G75040	0.0598221		AT5G61590	AT1G80440	0.056064		AT4G37180	AT4G37450	0.0671365
	AT5G46830	AT5G05440	0.0687944		AT4G36570	AT1G22900	0.0558536		AT2G46270	AT4G37450	0.0655954
	AT3G51910	AT5G05440	0.0643845		AT5G04150	AT2G23540	0.0554882		AT4G25490	AT4G37450	0.0622522
	AT5G24110	AT5G10410	0.068773		AT3G05690	AT2G23540	0.0517251		AT4G25480	AT4G37450	0.0593245
	AT5G67450	AT5G05960	0.0687153		AT5G47230	AT2G23540	0.0476013		AT5G05790	AT5G52640	0.0671474
	AT4G36570	AT5G05960	0.0682016		AT1G46480	AT3G23880	0.0549754		AT2G46270	AT4G35770	0.0670225
	AT2G38300	AT5G05960	0.0661242		AT2G22800	AT3G23880	0.0549189		AT3G11020	AT4G35770	0.0666861
	AT2G46680	AT2G23000	0.0684563		AT1G74930	AT3G23880	0.0508865		AT3G16770	AT4G35770	0.0627574
	AT1G18570	AT4G23130	0.0682101		AT5G61600	AT3G23880	0.0470586		AT4G25480	AT4G35770	0.0603196
	AT4G36570	AT1G51820	0.0681865		AT2G28500	AT3G29810	0.0548817		AT5G46830	AT3G09910	0.0669918
	AT3G02380	AT1G51820	0.0614575		AT1G13260	AT3G29810	0.0525694		AT3G02990	AT3G09910	0.0623887
	AT5G48250	AT4G19430	0.0681618		AT1G19510	AT2G43620	0.0542308		AT5G03720	AT3G09910	0.0606663
	AT5G61590	AT3G26510	0.0681001		AT2G46680	AT2G43620	0.0504811		AT1G66230	AT1G05810	0.0669868
	AT5G61600	AT3G26510	0.0656231		AT5G67190	AT5G61440	0.054119		AT1G56650	AT1G05810	0.062195
	AT2G22800	AT3G26510	0.0605683		AT3G02380	AT5G61440	0.0466052		AT3G54390	AT1G05810	0.0590053
	AT2G28500	AT2G33380	0.0680986		AT4G36570	AT1G33440	0.0538977		AT5G03720	AT1G14210	0.0668601
	AT2G46680	AT2G33380	0.0637163		AT3G05690	AT1G33440	0.0514209		AT4G25490	AT1G14210	0.0614022
	AT2G31730	AT2G33380	0.0631211		AT1G26945	AT1G33440	0.0478545		AT1G18710	AT1G14210	0.0595881
	AT1G19510	AT2G19190	0.0680743		AT3G02380	AT1G33440	0.0475264		AT4G09820	AT2G37130	0.0667903
	AT4G09820	AT4G16590	0.067946		AT2G29660	AT1G33440	0.0474596		AT3G16770	AT2G37130	0.0599694
	AT3G51910	AT4G16590	0.0603445		AT5G24110	AT1G33440	0.0471538		AT3G11580	AT1G10682	0.0667755
	AT4G06746	AT1G52270	0.0674232		AT1G68840	AT5G20830	0.0535826		AT5G28770	AT1G62710	0.0667542
	AT1G06160	AT1G52270	0.0631226		AT1G01250	AT1G10990	0.0534973		AT1G01250	AT1G62710	0.0590683
	AT1G18570	AT1G52270	0.060408		AT4G06746	AT1G10990	0.0492679		AT1G56650	AT4G17870	0.0667382
	AT1G18570	AT3G62150	0.0673852		AT3G51910	AT1G10990	0.0457279		AT2G46680	AT4G17870	0.0662378
	AT5G24110	AT3G62150	0.0668226		AT4G36570	AT2G26040	0.0533889		AT4G25480	AT4G17870	0.0617356
	AT4G23810	AT3G62150	0.0661746		AT5G24110	AT2G26040	0.048392		AT4G06746	AT4G19820	0.0666521
	AT4G06746	AT3G62150	0.0611543		AT1G64380	AT4G19820	0.053282		AT1G68840	AT4G19820	0.0660646
	AT4G01720	AT3G62150	0.0576904		AT1G68840	AT4G19820	0.0475736		AT3G06160	AT4G19820	0.0578344
	AT3G02380	AT3G05660	0.0672842		AT1G46480	AT5G18670	0.0532588		AT5G46830	AT4G11460	0.0665235
	AT4G25480	AT3G05660	0.0648579		AT2G28500	AT5G18670	0.0469726		AT4G09820	AT1G62910	0.0665216
	AT2G28500	AT2G40000	0.0669723		AT4G39250	AT5G18670	0.0468453		AT4G06746	AT5G49360	0.0664578
	AT4G20970	AT2G40000	0.0632636		AT4G39780	AT4G20860	0.0529701		AT5G28770	AT5G49360	0.0621298
	AT1G49560	AT2G40000	0.0619641		AT3G02380	AT4G20860	0.0524584		AT3G58120	AT5G49360	0.0613152
	AT4G06746	AT1G13110	0.0668451		AT1G06160	AT2G36970	0.0529044		AT2G43140	AT5G49360	0.060185
	AT1G06160	AT1G13110	0.0662731		AT4G06746	AT2G36970	0.0510775		AT1G56650	AT5G49360	0.0578224
	AT3G55980	AT1G13110	0.0650394		AT5G61600	AT2G36970	0.0505969		AT5G24110	AT5G10410	0.0664157
	AT5G61600	AT1G13110	0.0572049		AT5G61590	AT2G36970	0.0468247		AT1G19510	AT5G10410	0.0588733
	AT2G28500	AT4G37530	0.0667648		AT1G25560	AT2G27830	0.0527058		AT5G28770	AT2G42900	0.0663919
	AT4G25480	AT4G37530	0.0631531		AT5G51190	AT2G27830	0.0506717		AT2G43140	AT2G42900	0.0625436
	AT5G46830	AT5G40800	0.0666284		AT2G22770	AT2G27830	0.0448263		AT3G02380	AT2G42900	0.0591877
	AT4G25480	AT5G40800	0.0650121		AT1G06160	AT5G52310	0.0525946		AT5G24110	AT2G42900	0.0580072
	AT1G18710	AT5G40800	0.0567529		AT4G06746	AT5G52310	0.0515527		AT3G06160	AT1G63440	0.0662416
	AT1G13260	AT5G40800	0.0566743		AT3G55980	AT5G52310	0.0504449		AT1G49560	AT1G63440	0.0629013
	AT1G69490	AT2G01210	0.0666091		AT4G17490	AT5G52310	0.0478266		AT1G04990	AT1G63440	0.0589338
	AT3G54390	AT2G01210	0.0639261		AT1G27730	AT5G52310	0.0462553		AT2G31730	AT5G57050	0.0660146
	AT2G24700	AT2G01210	0.0568151		AT5G61600	AT5G52310	0.0454044		AT3G02990	AT5G57050	0.0623414
	AT2G28500	AT1G17710	0.0665782		AT2G28500	AT5G17460	0.0524836		AT2G46680	AT5G57050	0.0588127
	AT4G37180	AT1G17710	0.0649979		AT2G46680	AT5G17460	0.0473864		AT5G46830	AT5G57050	0.0567063
	AT1G49560	AT3G59480	0.0664216		AT1G01250	AT5G17460	0.046415		AT2G36270	AT5G63350	0.0657959
	AT3G26790	AT3G59480	0.0617321		AT3G11020	AT4G23210	0.0524135		AT1G56650	AT5G63350	0.0642315
	AT2G46680	AT1G13920	0.0663471		AT4G17460	AT4G23210	0.0473828		AT4G37180	AT3G19620	0.0657779
	AT3G24520	AT1G13920	0.064545		AT3G16770	AT4G23210	0.0456415		AT1G68840	AT3G19620	0.0584205
	AT4G37180	AT1G13920	0.0598174		AT5G48250	AT4G27280	0.0523471		AT1G68840	AT4G11290	0.0657402
	AT4G37180	AT3G59880	0.0660903		AT1G68840	AT4G27280	0.0492563		AT1G01250	AT1G07430	0.0657021
	AT4G23810	AT3G59880	0.0659287		AT5G46830	AT1G27020	0.0522154		AT1G18710	AT1G07430	0.0626697
	AT4G01720	AT3G59880	0.0630535		AT3G51910	AT1G27020	0.0451838		AT2G36270	AT1G07430	0.0622278
	AT1G06160	AT3G59880	0.0621585		AT5G24110	AT5G10410	0.0520141		AT5G03720	AT1G07430	0.0608187
	AT5G46830	AT1G22400	0.0659717		AT4G01720	AT5G10410	0.0473271		AT5G46830	AT1G07430	0.0581994
	AT4G06746	AT1G22400	0.0650552		AT1G19510	AT5G10410	0.0469733		AT2G46270	AT5G03120	0.0656922
	AT3G54390	AT1G22400	0.0571997		AT2G28500	AT5G10410	0.0444147		AT4G09820	AT5G03120	0.0570807
	AT5G24110	AT4G19370	0.0659651		AT5G48250	AT4G01130	0.0512064		AT1G04990	AT2G23910	0.0656448
	AT1G06160	AT4G19370	0.0614381		AT5G05790	AT4G01130	0.0507613		AT4G24150	AT2G23910	0.060448
	AT3G55980	AT4G19370	0.0569462		AT3G02380	AT4G01130	0.0468386		AT2G37260	AT2G23910	0.055957
	AT5G67190	AT5G61440	0.0659238		AT3G51910	AT1G65900	0.0506926		AT5G46830	AT2G23000	0.0654062
	AT4G36570	AT4G36410	0.0659097		AT5G46830	AT1G65900	0.0464447		AT2G46680	AT2G23000	0.0623367
	AT2G28500	AT5G25110	0.065852		AT1G06160	AT5G37600	0.050692		AT4G37180	AT2G23000	0.0589655
	AT5G46830	AT5G25110	0.0613923		AT1G68840	AT5G37600	0.0491212		AT5G28770	AT2G46250	0.0654049
	AT2G28500	AT1G53100	0.0657246		AT4G23810	AT5G37600	0.0444046		AT1G18710	AT3G11410	0.0652867
	AT4G25480	AT2G39200	0.0657067		AT2G22770	AT4G02520	0.0499856		AT1G01250	AT3G11410	0.061473
	AT1G68840	AT1G26800	0.0656154		AT3G51910	AT4G02520	0.0485373		AT4G09820	AT1G12880	0.0651308
	AT5G61590	AT1G26800	0.0605351		AT4G36570	AT4G02520	0.0468401		AT1G73830	AT1G12880	0.0607118
	AT4G09820	AT1G67820	0.0655573		AT3G51910	AT4G30650	0.0494784		AT1G56650	AT2G41990	0.0649864
	AT2G23290	AT1G67820	0.062456		AT3G02380	AT4G30650	0.0438468		AT3G54390	AT2G41990	0.0645052
	AT3G54390	AT1G67820	0.0623819		AT2G28500	AT4G30650	0.0427102		AT5G46830	AT2G41990	0.0637403
	AT3G16770	AT1G67820	0.0606518		AT3G11020	AT4G30650	0.0421492		AT1G04990	AT2G41990	0.0603838
	AT2G37260	AT1G67820	0.0576873		AT5G24110	AT1G76990	0.0487883		AT1G18710	AT2G41990	0.0559468
	AT1G18570	AT5G44990	0.065544		AT5G46830	AT1G76990	0.0482354		AT3G54390	AT5G07990	0.0649158
	AT1G06160	AT5G44990	0.0641411		AT3G55980	AT4G19370	0.0484904		AT1G68840	AT5G07990	0.0602418
	AT5G24110	AT5G44990	0.0640691		AT5G24110	AT4G19370	0.047079		AT4G37180	AT5G07990	0.0585942
	AT3G55980	AT5G44990	0.0625436		AT1G06160	AT4G19370	0.0416617		AT4G09820	AT5G07990	0.0581577
	AT4G23810	AT5G44990	0.0584976		AT4G39250	AT1G18265	0.0481525		AT1G56650	AT1G09500	0.0648825
	AT5G46830	AT5G62360	0.0654753		AT2G28500	AT1G18265	0.0461766		AT2G36270	AT1G09500	0.0643954
	AT2G31730	AT5G62360	0.0604937		AT2G46680	AT1G18265	0.0422669		AT2G37260	AT1G09500	0.0564647
	AT3G26790	AT5G62360	0.0574206		AT5G67190	AT1G18265	0.0418864		AT4G25480	AT1G03870	0.064815
	AT3G51910	AT5G62360	0.0566505		AT4G20970	AT1G18265	0.0415638		AT2G46270	AT1G03870	0.0644896
	AT2G46680	AT3G50970	0.0652486		AT5G05790	AT3G14780	0.0480035		AT4G37180	AT1G03870	0.0591568
	AT5G61590	AT5G25280	0.0652324		AT4G25480	AT3G14780	0.0450922		AT3G02380	AT1G12570	0.0647157
	AT5G61600	AT5G25280	0.0632892		AT4G36570	AT3G14780	0.044831		AT2G40750	AT1G12570	0.0632638
	AT3G55980	AT5G25280	0.05804		AT2G03710	AT3G14780	0.044258		AT1G67970	AT1G12570	0.0613388
	AT4G06746	AT5G25280	0.0567257		AT3G09600	AT3G14780	0.0415689		AT3G04420	AT1G12570	0.0560426
	AT4G09820	AT2G11810	0.0651272		AT3G51910	AT4G36010	0.0477566		AT3G54390	AT5G47500	0.0644896
	AT3G51910	AT2G11810	0.0637685		AT2G22770	AT4G36010	0.046281		AT3G16770	AT5G47500	0.0637382
	AT2G46680	AT2G11810	0.0632446		AT5G46830	AT4G36010	0.0438337		AT2G46680	AT3G55940	0.0643937
	AT4G20970	AT5G25450	0.0648585		AT4G25480	AT4G36010	0.041185		AT4G25490	AT3G55940	0.0628428
	AT4G23810	ATCG00180	0.0645798		AT5G48250	AT1G68050	0.0475395		AT4G37180	AT3G55940	0.0578729
	AT4G01720	ATCG00180	0.0569857		AT5G05790	AT1G68050	0.043285		AT2G37260	AT2G35910	0.0643673
	AT1G06160	ATCG00180	0.0567609		AT2G28160	AT1G68050	0.0425692		AT2G28500	AT4G32480	0.0643442
	AT3G11020	AT1G70985	0.0644704		AT4G39250	AT1G68050	0.041436		AT1G68840	AT4G32480	0.0627792
	AT5G67190	AT1G70985	0.0575252		AT2G46680	AT5G10170	0.0471703		AT2G37260	AT4G32480	0.0624158
	AT2G28500	AT1G70985	0.0569965		AT2G28500	AT5G10170	0.0415311		AT1G49560	AT4G32480	0.0555547
	AT5G46830	AT1G70985	0.0561791		AT1G64380	AT5G10170	0.0402696		AT2G31730	AT1G30720	0.0640531
	AT4G39250	AT1G70985	0.0552594		AT5G46830	AT5G10170	0.0401672		AT5G46830	AT1G30720	0.0595391
	AT4G23810	AT4G01750	0.0643931		AT2G46680	AT2G16990	0.0470458		AT1G04990	AT1G30720	0.0575327
	AT5G24110	AT4G01750	0.0637848		AT5G46830	AT2G16990	0.0440972		AT4G25480	AT4G19380	0.064002
	AT4G01720	AT4G01750	0.059339		AT1G19510	AT2G16990	0.0429278		AT4G37180	AT4G19380	0.0573171
	AT1G18570	AT4G01750	0.0582031		AT1G64380	AT2G16990	0.0417301		AT1G01250	AT3G27250	0.0639495
	AT4G06746	AT4G01750	0.055202		AT5G24110	AT2G16990	0.0407316		AT2G36270	AT3G27250	0.0559381
	AT2G31730	AT5G20790	0.0640718		AT3G51910	AT1G19380	0.0464739		AT3G02990	AT3G27250	0.0545364
	AT4G36570	AT5G20790	0.0616072		AT1G64380	AT1G19380	0.0454562		AT2G31730	AT3G21460	0.0639394
	AT3G51910	AT1G16390	0.0640048		AT3G11020	AT1G19380	0.041709		AT5G56780	AT3G21460	0.0635822
	AT3G11020	AT1G16390	0.0635056		AT5G67190	AT1G19380	0.040367		AT4G24150	AT3G21460	0.0613087
	AT2G26150	AT1G16390	0.0580157		AT5G46830	AT1G19380	0.0401037		AT4G21440	AT3G21460	0.0607872
	AT1G06160	AT3G57010	0.0640048		AT1G64380	AT1G06090	0.0463925		AT5G25390	AT3G21460	0.0604002
	AT3G24520	AT4G02280	0.0639353		AT3G51910	AT1G06090	0.0429214		AT3G11580	AT3G21460	0.0586046
	AT2G46680	AT4G02280	0.0607721		AT2G22770	AT1G06090	0.0427374		AT2G46680	AT3G21460	0.0544655
	AT5G67450	AT4G02280	0.0583477		AT5G24110	AT1G06090	0.0405056		AT1G04990	AT5G52882	0.0639157
	AT5G46830	AT5G46790	0.0638827		AT5G46830	AT4G18270	0.0457109		AT2G46680	AT5G52882	0.0602752
	AT2G46680	AT5G46790	0.0583974		AT2G46680	AT4G18270	0.0451832		AT4G25480	AT5G52882	0.0564418
	AT3G11020	AT5G46790	0.0556922		AT2G22770	AT4G18270	0.0401503		AT2G28500	AT2G41380	0.0638172
	AT4G20970	AT3G03341	0.0635282		AT5G67190	AT4G18270	0.0399015		AT1G04990	AT2G41380	0.058397
	AT2G22770	AT3G03341	0.0622662		AT2G22800	AT1G69160	0.0456623		AT1G56650	AT1G69610	0.0638029
	AT1G18710	AT3G03341	0.0550808		AT1G68840	AT3G02140	0.0454339		AT1G75250	AT1G69610	0.0619761
	AT5G67450	AT3G47510	0.0634704		AT2G22800	AT1G48330	0.0452321		AT1G56650	AT2G37760	0.0637343
	AT4G09820	AT4G30830	0.0634435		AT1G46480	AT1G48330	0.0394854		AT5G28770	AT3G50390	0.0637097
	AT4G20970	AT4G30830	0.0605929		AT3G51910	AT1G01340	0.0451152		AT4G37180	AT3G50390	0.0618693
	AT3G24520	AT4G30830	0.0548779		AT5G67190	AT1G01340	0.0437831		AT3G06160	AT1G30190	0.0634656
	AT5G67190	AT5G37670	0.063352		AT3G11020	AT1G01340	0.0420987		AT2G31730	AT1G30190	0.0557924
	AT5G14750	AT5G37670	0.0579848		AT4G39250	AT1G01340	0.0413141		AT4G06746	AT5G46730	0.0634554
	AT2G26150	AT5G37670	0.0567665		AT3G02380	AT2G31110	0.0450436		AT1G73830	AT3G25400	0.0632805
	AT3G01600	AT5G28910	0.0632006		AT1G64380	AT2G31110	0.0401366		AT4G17460	AT3G25400	0.057173
	AT1G68840	AT5G28910	0.0578985		AT4G39250	AT4G23200	0.0449286		AT5G67190	AT3G25400	0.0567653
	AT1G13260	AT5G28910	0.056082		AT4G36570	AT4G23200	0.0438375		AT3G16770	AT3G25400	0.0559353
	AT2G26150	AT1G20030	0.0631945		AT5G46830	AT4G23200	0.043792		AT5G56780	AT3G49410	0.0631198
	AT1G49560	AT1G20030	0.061477		AT4G25480	AT4G23200	0.0416433		AT5G25390	AT3G49410	0.0617401
	AT5G46830	AT1G20030	0.0568767		AT3G04420	AT4G23200	0.040454		AT2G40750	AT3G49410	0.0597931
	AT3G11020	AT1G20030	0.0546703		AT2G46680	AT4G23200	0.0383711		AT2G47890	AT3G49410	0.057186
	AT3G13960	AT3G13175	0.0631627		AT4G23810	AT5G02780	0.0441972		AT2G46680	AT1G64660	0.0629691
	AT3G01600	AT3G13175	0.0586241		AT1G06160	AT5G02780	0.0397736		AT4G09820	AT1G64660	0.0607815
	AT1G13260	AT3G13175	0.0551965		AT2G22770	AT5G02780	0.0389212		AT3G02380	AT3G05650	0.0629337
	AT1G27730	AT2G04070	0.0631568		AT4G25480	AT5G02780	0.0383618		AT1G18710	AT3G16690	0.0629181
	AT4G37180	AT2G04070	0.0594892		AT3G02380	AT4G37520	0.042891		AT1G19510	AT3G16690	0.0568405
	AT4G23810	AT5G53486	0.0631132		AT3G51910	AT4G37520	0.04262		AT2G37260	AT1G24530	0.0628758
	AT2G43000	AT5G53486	0.0625452		AT1G64380	AT4G37520	0.0425157		AT1G49560	AT3G52480	0.0625534
	AT1G18570	AT5G53486	0.0552182		AT4G20970	AT4G37520	0.0371755		AT3G11020	AT1G58370	0.0622438
	AT4G01720	AT5G53486	0.0539165		AT2G22800	AT4G37520	0.0370189		AT3G51910	AT5G56160	0.0621816
	AT4G37180	AT5G53486	0.0539078		AT4G39780	AT5G62210	0.0428115		AT1G56650	AT5G56160	0.0607063
	AT5G61600	AT5G52310	0.062819		AT5G61600	AT5G62210	0.0419044		AT2G46680	AT5G56160	0.0596653
	AT1G06160	AT5G52310	0.0613626		AT4G25480	AT5G62210	0.0411102		AT4G25480	AT5G56160	0.0534135
	AT2G46680	AT1G28010	0.0628042		AT5G24110	AT1G23090	0.0416036		AT4G36570	AT3G05730	0.0621607
	AT4G09820	AT1G28010	0.0613429		AT1G01250	AT1G23090	0.0389769		AT2G46680	AT3G05730	0.0576286
	AT3G16770	AT1G28010	0.0552578		AT5G46830	AT1G23090	0.0372304		AT3G26790	AT4G26830	0.0621484
	AT3G51910	AT1G28010	0.0552337		AT4G36570	AT5G55930	0.040648		AT5G03720	AT4G26830	0.0601161
	AT4G25480	AT1G28010	0.054515		AT1G64380	AT5G55930	0.0370871		AT5G46830	AT4G26830	0.0582338
	AT5G46830	AT1G65845	0.0627606		AT5G24110	AT5G55930	0.0370548		AT2G31730	AT4G26830	0.0575151
	AT2G46680	AT1G65845	0.0558327		AT2G46680	AT5G55930	0.0367659		AT4G17460	AT1G51380	0.0617893
	AT3G54390	AT5G07990	0.0627604		AT3G02380	AT5G55930	0.0348054		AT2G28500	AT1G51380	0.0599068
	AT1G68840	AT5G07990	0.0578128		AT1G68840	AT1G21050	0.0397572		AT1G67970	AT1G51380	0.0579992
	AT4G09820	AT5G07990	0.0565704		AT1G64380	AT1G21050	0.039005		AT5G25390	AT1G08440	0.0617187
	AT2G28500	AT5G43860	0.0626763		AT2G28500	AT1G21050	0.0377286		AT3G62610	AT1G08440	0.0609829
	AT1G19510	AT3G16690	0.0626314		AT4G25480	AT1G21050	0.0361055		AT3G02380	AT1G08440	0.0589002
	AT1G18710	AT3G16690	0.0594351		AT3G02380	AT3G63160	0.0393895		AT5G56780	AT1G08440	0.0586045
	AT3G51910	AT4G21870	0.0625128		AT3G51910	AT3G63160	0.0378616		AT2G47890	AT1G08440	0.0584081
	AT5G46830	AT4G21870	0.0551464		AT4G20970	AT3G63160	0.0339697		AT4G06746	AT1G22400	0.0617113
	AT3G11020	AT5G36925	0.0624545		AT1G64380	AT1G09070	0.0389596		AT1G18330	AT3G03341	0.0616733
	AT2G22770	AT1G65390	0.0624201		AT2G28500	AT1G09070	0.0352141		AT2G22770	AT3G03341	0.0575095
	AT4G06746	AT1G65390	0.0610204		AT5G51190	AT1G09070	0.0343709		AT2G47890	AT2G39200	0.0616169
	AT1G49560	AT1G65390	0.0580486		AT1G68840	AT1G09070	0.0339319		AT2G22770	AT1G65390	0.0614462
	AT5G48250	AT2G05380	0.0623624		AT3G02380	AT1G09070	0.0334008		AT4G06746	AT1G65390	0.0595569
	AT3G54390	AT3G58650	0.0623174		AT3G51910	AT1G09070	0.0332444		AT2G28500	AT4G37530	0.0614122
	AT2G24700	AT3G58650	0.0538884						AT3G11020	AT4G38400	0.0609
	AT4G37180	AT3G58650	0.0533219						AT4G25480	AT4G38400	0.0599295
	AT3G01600	AT1G01640	0.0620325						AT2G46270	AT4G38400	0.0562236
	AT3G54390	AT3G28455	0.0619469						AT4G36570	AT4G38400	0.0545684
	AT5G61590	AT3G28455	0.0579781						AT4G09820	AT4G38400	0.0522803
	AT3G55980	AT3G28455	0.054399						AT4G25490	AT1G53100	0.060884
	AT5G67450	AT3G28455	0.0531613						AT2G46680	AT1G53100	0.0535149
	AT3G51910	AT2G30010	0.0616224						AT2G40750	AT1G54040	0.0608617
	AT4G37180	AT3G26320	0.0615688						AT1G67970	AT1G54040	0.0582903
	AT3G55980	AT3G26320	0.0572898						AT3G04420	AT1G54040	0.054599
	AT1G06160	AT3G26320	0.0551521						AT3G51910	AT2G39570	0.0606744
	AT4G23810	AT3G26320	0.053404						AT5G28770	AT5G40450	0.060674
	AT3G54390	AT1G25530	0.0609692						AT4G06746	AT5G40450	0.0557269
	AT2G22800	AT1G25530	0.0569675						AT5G56780	AT1G76090	0.0606522
	AT5G61590	AT1G25530	0.0565889						AT4G37180	AT1G76090	0.0592119
	AT3G16770	AT1G25530	0.0552433						AT5G25390	AT1G76090	0.0535029
	AT3G01600	AT4G30460	0.0607451						AT2G46270	AT1G76090	0.0522382
	AT2G22800	AT4G30460	0.0576249						AT2G46680	AT4G37400	0.060649
	AT3G01600	AT4G33550	0.0607132						AT4G36570	AT4G37400	0.0592882
	AT4G01720	AT4G33550	0.0547506						AT1G67970	AT5G67090	0.0604586
	AT1G68840	AT5G07000	0.0604309						AT5G28770	AT1G24070	0.0604342
	AT4G01720	AT5G07000	0.059471						AT4G09820	AT1G24070	0.0527748
	AT2G22800	AT5G07000	0.0560089						AT1G67970	AT1G30260	0.0602426
	AT3G01600	AT5G07000	0.0552391						AT4G36570	AT1G30260	0.0596986
	AT1G06160	AT5G07000	0.0535645						AT2G40750	AT1G30260	0.0538038
	AT1G80840	AT2G42530	0.0602272						AT1G01250	AT1G30260	0.0533897
	AT4G23810	AT2G42530	0.0587149						AT5G25390	AT2G29950	0.0602251
	AT5G24110	AT2G42530	0.0550703						AT3G11580	AT2G29950	0.0587172
	AT1G18570	AT2G42530	0.0550423						AT1G75250	AT2G29950	0.0529298
	AT4G01720	AT2G42530	0.0529281						AT2G26150	AT3G19230	0.0601517
	AT3G11020	AT1G58370	0.0601577						AT1G49560	AT3G19230	0.0547191
	AT2G26150	AT1G58370	0.0552257						AT1G75250	AT3G52180	0.0599798
	AT2G37260	AT1G58370	0.0551131						AT3G11580	AT3G52180	0.0526878
	AT5G46830	AT1G58370	0.055051						AT1G04990	AT4G30270	0.0599387
	AT1G49560	AT1G58370	0.0534822						AT2G46680	AT4G30270	0.0574541
	AT3G51910	AT1G58370	0.0527674						AT1G66230	AT2G27660	0.0599236
	AT3G54390	AT1G58370	0.0512523						AT1G56650	AT1G28010	0.0597913
	AT3G51910	AT1G12110	0.0599875						AT2G46680	AT1G28010	0.0513956
	AT5G46830	AT1G12110	0.059929						AT4G25480	AT2G35070	0.0597355
	AT4G25480	AT1G12110	0.0568055						AT5G46830	AT2G35070	0.0570086
	AT2G46680	AT1G12110	0.0518993						AT2G36270	AT2G35070	0.0521561
	AT5G46830	AT1G22690	0.0597628						AT2G46270	AT2G35070	0.0516342
	AT3G26790	AT1G22690	0.0538269						AT5G03720	AT1G54570	0.0596034
	AT3G11020	AT1G28660	0.059653						AT4G21440	AT1G54570	0.0562429
	AT2G28500	AT1G28660	0.0563945						AT2G36270	AT1G54570	0.0554808
	AT4G25480	AT1G28660	0.052272						AT2G46680	AT5G44020	0.0595321
	AT2G31730	AT3G16670	0.0594598						AT5G28770	AT3G48510	0.0594515
	AT5G46830	AT3G16670	0.0583794						AT5G03720	AT3G48510	0.053379
	AT3G51910	AT3G16670	0.0546776						AT1G75250	AT3G48510	0.052816
	AT2G46680	AT3G16670	0.0523538						AT1G18710	AT3G48510	0.0520156
	AT1G06160	AT3G05880	0.0592907						AT1G18330	AT5G40790	0.0594268
	AT2G38300	AT3G05880	0.0510084						AT1G66230	AT5G40790	0.0508645
	AT1G06160	AT3G10985	0.0592872						AT2G47890	AT2G45600	0.0593722
	AT5G46830	AT4G21850	0.0591432						AT1G01250	AT2G45600	0.0558385
	AT3G51910	AT4G21850	0.052814						AT2G28500	AT2G45600	0.0542825
	AT2G26150	AT2G41150	0.0590645						AT4G25490	AT2G45600	0.0536484
	AT4G37180	AT2G41150	0.0510024						AT3G02990	AT2G45600	0.0514755
	AT5G46830	AT3G05320	0.0589535						AT2G31730	AT5G17760	0.0592692
	AT2G46680	AT3G05320	0.0566133						AT2G46680	AT2G21650	0.0590229
	AT4G25480	AT3G05320	0.0562566						AT3G26790	AT2G21650	0.0529296
	AT2G31730	AT3G05320	0.0553382						AT4G25480	AT5G02940	0.0589552
	AT2G38300	AT3G05320	0.0517613						AT1G66230	AT4G20320	0.0589355
	AT4G23810	AT2G26020	0.0586923						AT2G37260	AT4G20320	0.0553426
	AT2G22800	AT2G26020	0.0572129						AT5G03720	AT4G20320	0.0503724
	AT5G51190	AT2G26020	0.0571694						AT2G40750	AT3G25190	0.0588809
	AT1G06160	AT2G26020	0.0538496						AT4G21440	AT1G78530	0.0587823
	AT4G01720	AT2G26020	0.0514128						AT4G39250	AT1G78530	0.0560711
	AT2G46680	AT4G04570	0.0586153						AT2G36270	AT1G78530	0.0509083
	AT2G28500	AT2G34850	0.0583077						AT3G06160	AT2G12400	0.0585351
	AT2G46680	AT2G34850	0.0531712						AT4G36570	AT2G12400	0.0564642
	AT4G06746	AT3G50480	0.0581809						AT4G09820	AT1G62380	0.0585137
	AT1G06160	AT3G50480	0.051335						AT3G16770	AT1G62380	0.0572203
	AT5G59820	AT4G37490	0.0580037						AT1G68840	AT5G55950	0.0584416
	AT3G54390	AT4G37490	0.056794						AT4G25480	AT3G27870	0.0583801
	AT3G55980	AT4G37490	0.050882						AT1G75250	AT1G14430	0.0583426
	AT4G39250	AT2G38310	0.0578225						AT2G36270	AT1G14430	0.0513082
	AT2G31730	AT2G38310	0.0521092						AT2G26150	AT4G16146	0.0578314
	AT5G48250	AT1G68050	0.0574711						AT1G67970	AT4G16146	0.0539296
	AT2G31730	AT1G68050	0.0532737						AT4G36570	AT4G16146	0.0520641
	AT5G46830	AT4G39030	0.0567279						AT3G04420	AT4G16146	0.0518586
	AT3G26790	AT4G39030	0.0548403						AT3G02380	AT4G16146	0.0508177
	AT4G37180	AT4G39030	0.0527689						AT4G36570	AT1G11340	0.0577497
	AT4G23810	AT4G39030	0.0504239						AT3G51910	AT1G11340	0.0564655
	AT5G24110	AT5G52740	0.0564718						AT5G61590	AT1G04570	0.0576997
	AT3G55980	AT5G52740	0.0534722						AT1G68840	AT3G02140	0.0576622
	AT1G18570	AT5G52740	0.050875						AT5G24110	AT3G02140	0.0491292
	AT3G11020	AT1G12845	0.0562952						AT2G46680	AT3G05320	0.0576316
	AT2G37260	AT5G16570	0.0557832						AT5G46830	AT3G05320	0.0500993
	AT3G51910	AT5G16570	0.0518822						AT2G36270	AT4G33905	0.0575838
	AT2G28500	AT1G16850	0.0555853						AT1G56650	AT4G33905	0.0575262
	AT3G51910	AT1G16850	0.0475056						AT4G25480	AT2G30930	0.0574382
	AT1G06160	AT2G34960	0.0551668						AT1G18330	AT2G30930	0.0567739
	AT3G55980	AT2G34960	0.0513315						AT5G46830	AT1G46554	0.0573476
	AT3G02380	AT2G34960	0.0478924						AT2G46680	AT1G46554	0.0509094
	AT5G46830	AT1G27020	0.0550563						AT2G36270	AT5G62360	0.057344
	AT5G67190	AT5G24470	0.0550498						AT5G46830	AT5G62360	0.0534304
	AT4G37180	AT5G24470	0.0518869						AT1G56650	AT5G62360	0.0525306
	AT2G28500	AT5G17460	0.0548464						AT4G25480	AT2G43520	0.057307
	AT2G46680	AT5G17460	0.0486173						AT5G56780	AT2G43520	0.0557968
	AT2G24700	AT1G13130	0.0548312						AT3G16770	AT2G43520	0.0548776
	AT5G67190	AT1G13130	0.0506376						AT2G46270	AT2G43520	0.0513882
	AT4G25480	AT1G13130	0.048053						AT3G11020	AT2G43520	0.0504508
	AT4G23810	AT1G69520	0.0545398						AT2G40750	AT2G43520	0.0489756
	AT5G24110	AT1G69520	0.0528223						AT1G56650	AT4G08870	0.057206
	AT4G01720	AT1G69520	0.0502497						AT1G04990	AT4G08870	0.0519493
	AT1G18570	AT1G69520	0.0474822						AT4G09820	AT4G08870	0.0499092
	AT1G06160	AT5G54720	0.0544467						AT1G04990	AT1G16445	0.0570834
	AT5G24110	AT5G54720	0.0495567						AT2G46680	AT1G16445	0.0546649
	AT1G18570	AT5G54720	0.0487599						AT2G31730	AT1G16445	0.0529571
	AT2G46680	AT1G77120	0.0542559						AT4G37180	AT1G68570	0.0570313
	AT3G51910	AT1G77120	0.0514142						AT1G18710	AT1G68570	0.0548016
	AT4G37180	AT1G77120	0.0502113						AT5G24110	AT3G16150	0.0568996
	AT4G25480	AT1G77120	0.0477051						AT1G68840	AT3G16150	0.0531184
	AT3G26790	AT1G77120	0.0476085						AT1G19510	AT3G16150	0.0525793
	AT1G06160	AT5G10740	0.0541222						AT1G75250	AT3G51660	0.0567953
	AT5G47230	AT5G10740	0.0504385						AT1G67970	AT3G51660	0.0511405
	AT1G25560	AT5G10740	0.049347						AT4G25480	AT3G51660	0.0490512
	AT4G06746	AT5G10740	0.0492593						AT4G37180	AT5G24470	0.0567209
	AT1G68840	AT5G10740	0.0488234						AT2G47890	AT5G24470	0.0529998
	AT5G61600	AT5G10740	0.0485668						AT4G09820	AT5G24570	0.0566301
	AT1G19510	AT2G25470	0.0540438						AT4G25480	AT5G24570	0.0565358
	AT5G48250	AT2G25470	0.0491789						AT3G16770	AT5G24570	0.0508823
	AT2G37260	AT5G18670	0.0533538						AT2G46270	AT5G24570	0.0506922
	AT1G13260	AT5G18670	0.0522113						AT3G11020	AT1G12845	0.0565407
	AT2G28500	AT5G18670	0.0494307						AT4G37180	AT4G33550	0.0563817
	AT3G51910	AT1G10990	0.0532399						AT1G68840	AT5G62210	0.0563493
	AT4G06746	AT1G10990	0.0516585						AT3G26790	AT5G62210	0.0527435
	AT3G54390	AT1G10990	0.0498088						AT5G56780	AT1G72430	0.0563204
	AT5G46830	AT1G10990	0.0489834						AT4G09820	AT1G72430	0.0537354
	AT1G18570	AT1G10990	0.0463062						AT3G16770	AT1G72430	0.0503022
	AT3G26790	AT4G23200	0.0532185						AT4G36570	AT1G72430	0.0491685
	AT4G06746	AT2G29120	0.0531745						AT2G23290	AT1G72430	0.048013
	AT2G46680	AT2G29120	0.0494489						AT5G67190	AT1G70985	0.0562907
	AT5G47230	AT2G29120	0.0452963						AT2G28500	AT1G70985	0.0550587
	AT5G46830	AT2G16990	0.0523941						AT3G11020	AT1G70985	0.0503121
	AT2G28500	AT2G16990	0.0511075						AT4G39250	AT1G70985	0.0489562
	AT2G46680	AT2G16990	0.0446848						AT2G22770	AT2G13680	0.0562906
	AT5G51190	AT4G27280	0.0522551						AT3G51910	AT2G13680	0.051573
	AT1G68840	AT4G27280	0.0514717						AT3G26790	AT2G37870	0.056142
	AT5G61600	AT4G27280	0.0488352						AT1G01250	AT2G39050	0.0560171
	AT2G28500	AT4G27280	0.0485714						AT3G16770	AT4G13330	0.0559806
	AT2G22800	AT4G27280	0.0478868						AT1G04990	AT4G13330	0.0539804
	AT4G20970	AT4G27280	0.0470849						AT4G17460	AT4G13330	0.0527013
	AT1G68840	AT3G02140	0.05138						AT3G11020	AT4G13330	0.0514463
	AT3G26790	AT5G28640	0.0508771						AT4G25480	AT1G12110	0.0559213
	AT3G54390	AT5G28640	0.0475475						AT5G46830	AT1G12110	0.0483614
	AT3G55980	AT5G28640	0.0459299						AT2G46680	AT1G12110	0.0478741
	AT4G37180	AT3G19620	0.0508324						AT4G37180	AT1G79520	0.0557527
	AT4G23810	AT3G19620	0.0472658						AT2G46680	AT1G79520	0.0516858
	AT1G06160	AT3G19620	0.0468404						AT5G46830	AT1G79520	0.0487551
	AT3G26790	AT3G03000	0.0507179						AT5G46830	AT4G21850	0.055737
	AT5G46830	AT3G03000	0.0494981						AT2G23290	AT1G52000	0.0554018
	AT3G01600	AT3G03000	0.0442951						AT4G09820	AT1G52000	0.054189
	AT3G54390	AT3G03000	0.0435575						AT1G18710	AT1G52000	0.053734
	AT2G22800	AT3G03000	0.043112						AT1G56650	AT1G52000	0.0534361
	AT2G26150	AT1G65900	0.050506						AT5G03720	AT1G52000	0.0529708
	AT5G46830	AT1G65900	0.0480302						AT2G46680	AT3G50970	0.0551347
	AT3G51910	AT1G65900	0.0471899						AT4G25480	AT3G16670	0.0550649
	AT3G26790	AT2G25540	0.0504566						AT2G28500	AT5G25110	0.0549669
	AT4G01720	AT2G25540	0.0490418						AT5G46830	AT5G25110	0.0497898
	AT2G22800	AT2G25540	0.0452227						AT1G01250	AT5G25110	0.048108
	AT5G46830	AT5G59310	0.0503815						AT2G47890	AT1G16850	0.0544298
	AT4G09820	AT5G59310	0.0497848						AT4G25490	AT1G16850	0.0490927
	AT3G51910	AT5G59310	0.0496414						AT3G54390	AT3G13130	0.0544104
	AT1G49560	AT5G59310	0.0495712						AT4G17460	AT3G13130	0.0505301
	AT2G37260	AT5G59310	0.0493718						AT1G66230	AT5G05440	0.0543999
	AT2G26150	AT5G59310	0.0437374						AT2G46680	AT5G05440	0.0508116
	AT1G06160	AT5G37600	0.0501442						AT4G39250	AT5G05440	0.0498151
	AT1G68840	AT5G37600	0.0453564						AT4G25480	AT1G35720	0.0542789
	AT5G61600	AT5G37600	0.0443149						AT2G46680	AT1G35720	0.0520998
	AT4G06746	AT5G37600	0.0428067						AT3G26790	AT1G35720	0.052016
	AT1G68840	AT5G62210	0.0498963						AT4G39250	AT1G35720	0.0490982
	AT3G01600	AT5G62210	0.0467734						AT5G67190	AT2G30520	0.0542345
	AT2G22800	AT1G48330	0.0496514						AT1G04990	AT2G30520	0.046724
	AT5G67190	AT5G06940	0.0496429						AT1G18330	AT5G04310	0.0541834
	AT2G31730	AT5G15430	0.0494546						AT2G31730	AT5G04310	0.0539446
	AT4G37180	AT5G15430	0.0443533						AT2G28500	AT5G04310	0.0526525
	AT5G46830	AT5G15430	0.0439514						AT3G04420	AT5G04310	0.0481155
	AT5G67190	AT5G15430	0.0430197						AT2G46680	AT5G64570	0.0539671
	AT1G68840	AT5G55950	0.0491595						AT4G25480	AT5G64570	0.0493944
	AT2G38300	AT5G55950	0.0482152						AT1G66230	AT5G64570	0.0482847
	AT2G28500	AT5G55950	0.0472082						AT4G06746	AT3G54830	0.0537986
	AT2G46680	AT5G55950	0.0460626						AT3G06160	AT3G54830	0.0485319
	AT2G31730	AT5G55950	0.0458782						AT3G51910	AT3G54830	0.0464803
	AT3G26790	AT5G55950	0.0437428						AT1G18710	AT2G21220	0.0536929
	AT4G25480	AT5G55950	0.0426755						AT2G47890	AT2G21220	0.0516833
	AT4G39250	AT5G55950	0.0421607						AT2G28500	AT4G25850	0.0536449
	AT1G49560	AT2G43620	0.0490424						AT2G47890	AT4G25850	0.0499935
	AT2G46680	AT2G43620	0.0449402						AT1G75250	AT4G25850	0.0475146
	AT3G26790	AT2G43620	0.0448402						AT5G28770	AT4G25850	0.0467504
	AT5G24110	AT2G43620	0.0447794						AT3G16770	AT5G37300	0.0535136
	AT1G19510	AT2G43620	0.0418266						AT1G68840	AT5G37300	0.0473427
	AT5G24110	AT1G06090	0.0480455						AT4G37180	AT1G77120	0.0532678
	AT2G26150	AT1G06090	0.0440012						AT2G46680	AT1G77120	0.0488616
	AT1G49560	AT1G04620	0.0478688						AT1G66230	AT1G77120	0.0458615
	AT2G31730	AT1G04620	0.0436471						AT2G28500	AT3G06500	0.053207
	AT2G22770	AT1G04620	0.040722						AT5G28770	AT1G02940	0.0529549
	AT1G49560	AT1G19380	0.0476379						AT3G58120	AT1G02940	0.0510713
	AT5G46830	AT1G19380	0.0435042						AT1G73830	AT1G02940	0.0503924
	AT2G22770	AT1G19380	0.0432043						AT3G11580	AT4G04840	0.0527892
	AT2G22800	AT1G19380	0.0408866						AT1G56650	AT4G04840	0.049722
	AT3G11020	AT1G19380	0.040882						AT1G18710	AT4G04840	0.0477814
	AT2G28500	AT1G21050	0.0475041						AT3G58120	AT4G04840	0.0467666
	AT5G24110	AT1G21050	0.0424143						AT3G11020	AT1G20030	0.0525427
	AT3G51910	AT1G21050	0.0406224						AT3G51910	AT1G20030	0.0503227
	AT1G49560	AT1G01340	0.0469766						AT5G46830	AT1G20030	0.0460067
	AT3G11020	AT1G01340	0.0428438						AT1G49560	AT1G20030	0.0450472
	AT5G48250	AT3G21620	0.0468837						AT5G46830	AT5G03190	0.0522535
	AT1G49560	AT3G21620	0.0456511						AT5G03720	AT5G03190	0.0486797
	AT2G38300	AT3G21620	0.0442169						AT3G11020	AT1G28660	0.0522339
	AT4G39250	AT3G21620	0.0433495						AT2G28500	AT1G28660	0.0496509
	AT2G46680	AT3G21620	0.0400885						AT2G31730	AT1G06830	0.0522089
	AT4G36570	AT4G02520	0.0466981						AT2G23290	AT1G06830	0.0509773
	AT5G24110	AT4G02520	0.0433843						AT4G24150	AT1G06830	0.0508572
	AT4G37180	AT4G02520	0.0413629						AT1G04990	AT1G06830	0.0450903
	AT2G22800	AT4G02520	0.0398511						AT2G46680	AT4G21880	0.052187
	AT5G67190	AT4G02520	0.0397657						AT1G18330	AT4G21880	0.0447569
	AT1G49560	AT1G18265	0.0465827						AT5G46830	AT2G45180	0.0520831
	AT2G31730	AT1G18265	0.0462175						AT2G46680	AT2G45180	0.0504861
	AT4G37180	AT1G18265	0.0426385						AT1G04990	AT2G45180	0.0443461
	AT3G51910	AT1G18265	0.0404174						AT3G02380	AT4G02520	0.0518807
	AT3G26790	AT1G18265	0.0398787						AT2G37260	AT5G16570	0.051696
	AT5G46830	AT5G65280	0.0463169						AT1G75250	AT5G59310	0.0516109
	AT2G46680	AT5G65280	0.0452301						AT1G49560	AT5G59310	0.0442003
	AT2G22800	AT5G65280	0.0406368						AT3G54390	AT1G16390	0.0515899
	AT5G46830	AT2G40130	0.0463081						AT1G49560	AT1G16390	0.0499874
	AT4G25480	AT2G40130	0.0456478						AT3G11020	AT1G16390	0.0467781
	AT4G25480	AT5G10170	0.046277						AT2G47890	AT1G76250	0.051391
	AT3G51910	AT5G10170	0.0432407						AT3G02380	AT1G76250	0.0483492
	AT2G46680	AT5G10170	0.0424717						AT3G26790	AT2G43200	0.0513308
	AT2G22800	AT5G10170	0.0423643						AT4G25480	AT2G43200	0.0495342
	AT2G31730	AT5G10170	0.0421073						AT1G01250	AT2G43200	0.0465885
	AT2G22770	AT5G10170	0.0417006						AT3G04420	AT2G43200	0.0441574
	AT4G37180	AT5G10170	0.0406949						AT1G49560	AT2G25790	0.051037
	AT3G26790	AT5G10170	0.0404508						AT3G11580	AT2G25790	0.050048
	AT2G22800	AT5G20830	0.0462014						AT2G22770	AT2G25790	0.0489867
	AT1G68840	AT5G20830	0.0403533						AT2G31730	AT3G62950	0.0509675
	AT5G46830	AT4G30910	0.0461377						AT2G36270	AT3G62950	0.0469652
	AT2G26150	AT4G30910	0.0425756						AT3G11580	AT5G59320	0.0507562
	AT2G31730	AT4G30910	0.0415823						AT1G04990	AT5G59320	0.0468545
	AT2G46680	AT4G30910	0.0408075						AT2G22770	AT5G59320	0.0468533
	AT3G11020	AT4G30910	0.0402796						AT3G51910	AT5G59320	0.0450657
	AT4G39250	AT4G30910	0.040233						AT5G05790	AT2G41150	0.0505662
	AT4G20970	AT4G30910	0.0400025						AT4G25490	AT2G41150	0.0495147
	AT3G26790	AT4G30910	0.03975						AT2G26150	AT2G41150	0.0439743
	AT3G51910	AT3G16660	0.0456677						AT4G25480	AT1G23480	0.0504668
	AT2G26150	AT3G16660	0.0454279						AT1G56650	AT1G23480	0.0497944
	AT4G39250	AT3G16660	0.0396652						AT1G04990	AT1G23480	0.0494258
	AT4G36570	AT1G64890	0.0450772						AT3G02380	AT2G25810	0.0504397
	AT4G39250	AT1G64890	0.0423225						AT5G56780	AT2G25810	0.0482416
	AT3G11020	AT1G64890	0.0420453						AT5G43290	AT2G25810	0.047069
	AT2G22800	AT1G64890	0.0413922						AT2G22770	AT2G25810	0.0446592
	AT5G46830	AT1G64890	0.0400702						AT5G67411	AT2G25810	0.0430681
	AT4G37180	AT1G68440	0.0446802						AT5G67190	AT5G03380	0.0501228
	AT2G46680	AT1G68440	0.042658						AT3G51910	AT4G21870	0.050096
	AT1G49560	AT1G68440	0.0422506						AT5G46830	AT4G21870	0.0493832
	AT2G28500	AT1G68440	0.0418272						AT2G46270	AT1G21400	0.0496433
	AT2G26150	AT1G68440	0.040044						AT2G28500	AT1G21400	0.0484777
	AT5G46830	AT1G68440	0.0384434						AT1G01250	AT1G21400	0.0469629
	AT5G67190	AT4G36010	0.0445911						AT1G75250	AT1G21400	0.0459996
	AT4G25480	AT4G36010	0.0444845						AT2G36270	AT1G21400	0.0437688
	AT3G02380	AT4G36010	0.0414212						AT4G25480	AT1G21400	0.0434849
	AT3G51910	AT4G36010	0.0389107						AT2G37260	AT2G27402	0.0491325
	AT2G22770	AT4G30650	0.0444356						AT3G11020	AT2G27402	0.0457058
	AT3G51910	AT4G30650	0.044043						AT2G46680	AT2G27402	0.0438484
	AT4G25480	AT4G30650	0.0429996						AT3G16770	AT2G27402	0.0424543
	AT2G46680	AT4G30650	0.0425578						AT2G31730	AT2G27402	0.0422085
	AT5G67190	AT4G30650	0.0398185						AT1G04990	AT5G23940	0.049011
	AT4G36570	AT4G30650	0.0388848						AT2G46680	AT5G23940	0.0461911
	AT3G02380	AT4G30650	0.0388568						AT5G46830	AT5G23940	0.0452357
	AT2G31730	AT1G76990	0.0443286						AT2G31730	AT5G23940	0.0429501
	AT5G46830	AT1G76990	0.0442219						AT4G37730	AT5G23940	0.0423911
	AT4G20970	AT1G76990	0.0434776						AT1G18710	AT4G09020	0.0487926
	AT2G22770	AT1G76990	0.0422143						AT3G11580	AT4G09020	0.0469382
	AT5G67190	AT1G76990	0.0395016						AT2G22770	AT4G09020	0.0447668
	AT2G22800	AT1G76990	0.0389595						AT4G25490	AT3G27210	0.0482241
	AT1G68840	AT1G76990	0.0387687						AT2G28500	AT3G27210	0.0415879
	AT3G51910	AT1G76990	0.0383978						AT1G66230	AT2G30010	0.0482092
	AT5G24110	AT1G23090	0.043827						AT3G51910	AT2G30010	0.0481935
	AT5G46830	AT1G23090	0.04015						AT2G31730	AT1G68050	0.0481843
	AT3G51910	AT1G23090	0.0378556						AT5G05790	AT1G68050	0.0476925
	AT2G22800	AT4G37520	0.0435828						AT2G28160	AT1G68050	0.0475133
	AT3G02380	AT4G37520	0.0413249						AT4G25480	AT1G68050	0.0411317
	AT2G31730	AT4G37520	0.0380263						AT2G46680	AT4G04570	0.0479978
	AT2G46680	AT4G37520	0.0375736						AT4G39250	AT4G04570	0.0408313
	AT4G37180	AT4G37520	0.0374237						AT1G66230	AT5G18670	0.0476819
	AT4G39250	AT4G37520	0.0370674						AT1G49560	AT5G18670	0.0426792
	AT2G28500	AT1G79460	0.0435678						AT2G31730	AT1G76990	0.0476721
	AT2G26150	AT1G79460	0.0392921						AT5G46830	AT1G76990	0.0415424
	AT4G36570	AT1G79460	0.0385577						AT4G25490	AT5G17460	0.0476365
	AT4G37180	AT1G79460	0.0384807						AT2G46680	AT5G17460	0.0451576
	AT3G51910	AT1G79460	0.038336						AT1G01250	AT5G17460	0.0416493
	AT5G46830	AT1G58360	0.0435454						AT2G28500	AT5G17460	0.0415355
	AT2G22770	AT1G58360	0.0434921						AT2G36270	AT3G56250	0.047591
	AT3G26790	AT1G58360	0.0427113						AT5G46830	AT3G56250	0.041362
	AT4G20970	AT1G58360	0.0386321						AT1G04990	AT1G45145	0.0475891
	AT3G11020	AT1G58360	0.0374019						AT2G31730	AT1G45145	0.0473884
	AT2G22800	AT1G58360	0.0372216						AT3G02380	AT1G45145	0.0440812
	AT5G24110	AT3G63310	0.0433375						AT4G09820	AT1G45145	0.0429575
	AT3G51910	AT3G63310	0.0399035						AT5G05790	AT1G45145	0.0429403
	AT1G68840	AT3G63310	0.0396146						AT1G01250	AT1G10990	0.0473269
	AT3G26790	AT3G63310	0.0384269						AT4G06746	AT1G10990	0.0468153
	AT3G02380	AT3G63310	0.0380907						AT5G24110	AT1G10990	0.0424021
	AT2G31730	AT3G63310	0.0374451						AT5G28770	AT1G10990	0.0416144
	AT3G55980	AT1G35350	0.0420818						AT3G51910	AT3G10940	0.0472185
	AT4G39250	AT1G35350	0.0378522						AT5G46830	AT3G10940	0.0454409
	AT4G36570	AT3G18280	0.041981						AT1G56650	AT3G10940	0.0450179
	AT2G31730	AT3G18280	0.0414993						AT4G25480	AT3G10940	0.0443682
	AT1G49560	AT3G18280	0.0410055						AT1G04990	AT3G10940	0.042352
	AT2G26150	AT3G18280	0.0400291						AT4G25480	AT4G23400	0.0469528
	AT2G22800	AT3G18280	0.0391233						AT4G09820	AT4G23400	0.0453256
	AT3G26790	AT3G18280	0.0378498						AT1G18330	AT4G23400	0.0447599
	AT3G51910	AT3G18280	0.0370735						AT1G56650	AT4G23400	0.0445519
	AT3G11020	AT3G18280	0.0369217						AT5G46830	AT4G23400	0.0410706
	AT5G67190	AT3G18280	0.0359192						AT2G23290	AT4G23400	0.0399715
	AT4G25480	AT3G18280	0.0358996						AT4G25480	AT1G65845	0.0469165
	AT5G46830	AT3G18280	0.0357481						AT5G46830	AT1G65845	0.0438099
	AT1G49560	AT4G18270	0.0409847						AT2G31730	AT1G65845	0.0427236
	AT3G51910	AT4G18270	0.0386372						AT2G46680	AT1G65845	0.0414034
	AT2G46680	AT4G18270	0.0384028						AT2G23290	AT2G29500	0.0468784
	AT5G46830	AT4G18270	0.0368179						AT3G54390	AT2G29500	0.0425048
	AT4G39250	AT4G18270	0.0366295						AT3G16770	AT2G29500	0.0418035
	AT5G67190	AT4G18270	0.0365991						AT3G54390	AT5G23860	0.0468746
	AT4G20970	AT4G18270	0.0351291						AT2G37260	AT5G23860	0.0447351
	AT5G46830	AT5G55930	0.039903						AT1G04990	AT5G23860	0.0443721
	AT3G51910	AT5G55930	0.039577						AT4G37180	AT1G65900	0.0468545
	AT4G37180	AT5G55930	0.0371502						AT2G26150	AT1G65900	0.0414775
	AT1G49560	AT5G55930	0.0362381						AT5G46830	AT1G65900	0.0401582
	AT1G68840	AT5G55930	0.0356129						AT5G24110	AT1G21050	0.0464848
	AT5G24110	AT5G55930	0.0354943						AT2G28500	AT1G62570	0.0461707
	AT5G24110	AT3G63160	0.0396038						AT2G46680	AT1G62570	0.0433496
	AT4G36570	AT3G63160	0.0394544						AT2G31730	AT1G62570	0.0405129
	AT3G11020	AT3G63160	0.0387709						AT2G26150	AT4G01985	0.0460769
	AT4G25480	AT3G63160	0.0386737						AT4G25490	AT4G01985	0.0429984
	AT2G46680	AT3G63160	0.038558						AT1G68840	AT4G01985	0.0422453
	AT4G39250	AT2G31110	0.038954						AT1G19510	AT2G43620	0.0456382
	AT3G51910	AT2G31110	0.0387006						AT2G36270	AT1G22690	0.0456208
	AT2G22800	AT2G31110	0.0385593						AT5G46830	AT1G22690	0.0419638
	AT2G26150	AT2G31110	0.0371218						AT2G46680	AT1G22690	0.0418329
	AT4G37180	AT2G31110	0.0358379						AT4G09820	AT5G23350	0.0456199
	AT1G68840	AT2G31110	0.0354223						AT4G21440	AT5G23350	0.0446226
	AT5G67190	AT2G31110	0.0345717						AT5G25390	AT5G23350	0.0440807
	AT5G24110	AT2G31110	0.0341588						AT3G16770	AT5G23350	0.0436799
	AT3G02380	AT2G31110	0.0341581						AT4G37180	AT5G23350	0.0425989
	AT2G46680	AT2G31110	0.0341005						AT5G24110	AT1G06090	0.0454984
	AT2G31730	AT2G31110	0.033479						AT2G26150	AT1G06090	0.0406801
	AT3G26790	AT4G23570	0.0375887						AT5G46830	AT5G46790	0.0454084
	AT2G28500	AT4G23570	0.0375494						AT4G37180	AT5G46790	0.0434406
	AT1G49560	AT4G23570	0.0371869						AT2G46680	AT5G46790	0.0389374
	AT4G39250	AT4G23570	0.0371774						AT4G25490	AT5G46790	0.0388991
	AT4G37180	AT4G23570	0.0366336						AT2G46680	AT4G23200	0.044662
	AT2G22770	AT4G23570	0.0361403						AT5G46830	AT1G35350	0.0444342
	AT4G20970	AT4G23570	0.0357451						AT3G51910	AT1G01340	0.0440606
	AT5G67190	AT4G23570	0.0344974						AT1G49560	AT1G01340	0.0413817
	AT2G22800	AT4G23570	0.0340767						AT3G11020	AT1G01340	0.0402699
	AT4G25480	AT4G23570	0.0329653						AT4G25480	AT4G12390	0.0439321
	AT1G68840	AT4G23570	0.0327917						AT2G22770	AT4G12390	0.0438448
	AT5G46830	AT4G23570	0.0324781						AT3G02380	AT4G12390	0.0436116
									AT5G05790	AT4G12390	0.0388593
									AT2G28160	AT4G12390	0.0387954
									AT3G11020	AT1G19380	0.043732
									AT2G31730	AT1G19380	0.0383272
									AT2G28500	AT1G19380	0.0373948
									AT4G37180	AT5G55930	0.0432891
									AT1G68840	AT5G55930	0.0373329
									AT1G18330	AT5G55930	0.0370043
									AT5G67190	AT5G20830	0.0431336
									AT1G68840	AT5G20830	0.0410154
									AT3G16770	AT5G20830	0.0383252
									AT4G36570	AT1G18265	0.0431202
									AT2G31730	AT1G18265	0.0416761
									AT3G26790	AT1G18265	0.0388242
									AT1G19510	AT1G23090	0.043031
									AT5G24110	AT1G23090	0.0417056
									AT4G06746	AT1G23090	0.0396612
									AT5G28770	AT1G23090	0.039399
									AT4G25480	AT4G36010	0.043021
									AT1G18330	AT4G36010	0.0403893
									AT4G39250	AT4G36010	0.039581
									AT2G31730	AT3G11420	0.0426159
									AT1G18330	AT3G11420	0.0378643
									AT2G47890	AT4G30910	0.0423998
									AT4G37180	AT4G30910	0.0388548
									AT3G11020	AT4G30910	0.0384884
									AT4G25490	AT4G30910	0.0371789
									AT3G51910	AT2G38310	0.0420049
									AT4G25480	AT2G38310	0.0365628
									AT5G46830	AT2G38310	0.0361474
									AT4G36570	AT1G55020	0.0419099
									AT3G02380	AT1G55020	0.0406639
									AT1G18330	AT1G55020	0.0387446
									AT2G31730	AT5G15430	0.0416082
									AT4G36570	AT5G15430	0.0408025
									AT1G04990	AT5G15430	0.0361836
									AT5G67190	AT5G15430	0.0361799
									AT4G37180	AT1G28670	0.0414861
									AT2G46680	AT1G28670	0.041404
									AT4G25480	AT1G28670	0.04089
									AT1G04990	AT1G28670	0.0406574
									AT4G39250	AT1G28670	0.0358543
									AT2G46680	AT1G67300	0.041315
									AT2G28500	AT1G67300	0.0392783
									AT5G46830	AT1G67300	0.0351931
									AT2G22770	AT2G21660	0.0411548
									AT3G51910	AT2G21660	0.0385807
									AT4G37180	AT2G21660	0.035953
									AT2G46680	AT4G18270	0.0408363
									AT4G37180	AT4G18270	0.0402771
									AT1G04990	AT1G68440	0.0399824
									AT5G67190	AT1G68440	0.0392635
									AT2G28500	AT1G68440	0.0363342
									AT3G51910	AT1G68440	0.0361309
									AT5G46830	AT2G40130	0.0398331
									AT4G25480	AT2G40130	0.0342589
									AT3G11020	AT2G31110	0.039617
									AT5G67190	AT2G31110	0.037809
									AT4G36570	AT2G31110	0.0357589
									AT4G39250	AT2G31110	0.0353319
									AT1G68840	AT2G31110	0.0352197
									AT1G49560	AT2G31110	0.0338795
									AT5G46830	AT1G27020	0.039555
									AT3G51910	AT1G27020	0.0346593
									AT1G49560	AT2G34850	0.0388672
									AT2G46680	AT2G34850	0.0373486
									AT1G04990	AT2G34850	0.0370139
									AT3G51910	AT2G34850	0.0355019
									AT5G46830	AT1G64890	0.0388389
									AT1G04990	AT1G64890	0.0367814
									AT2G46680	AT1G64890	0.0363723
									AT4G39250	AT1G64890	0.0363262
									AT2G47890	AT1G64890	0.0353923
									AT2G28500	AT1G64890	0.0338417
									AT3G02380	AT1G64890	0.0335188
									AT1G68840	AT1G58360	0.0386681
									AT2G31730	AT1G58360	0.0374598
									AT4G39250	AT1G58360	0.037447
									AT5G24110	AT1G58360	0.0341477
									AT2G46680	AT2G16990	0.03845
									AT1G19510	AT2G16990	0.0374984
									AT1G04990	AT2G16990	0.0371389
									AT5G24110	AT2G16990	0.0369614
									AT3G51910	AT2G16990	0.0355977
									AT2G26150	AT2G16990	0.035516
									AT4G39250	AT2G16990	0.0332301
									AT5G67190	AT2G16990	0.0329979
									AT5G46830	AT2G16990	0.0329265
									AT3G04420	AT2G16990	0.0328834
									AT2G31730	AT5G65280	0.0378033
									AT2G46680	AT5G65280	0.0363725
									AT3G26790	AT5G65280	0.0340929
									AT2G26150	AT3G16660	0.0377804
									AT3G11020	AT3G16660	0.0365665
									AT2G46680	AT3G16660	0.0358403
									AT1G49560	AT3G16660	0.0352905
									AT2G31730	AT3G16660	0.0342092
									AT4G25490	AT3G16660	0.033566
									AT2G47890	AT3G16660	0.0330936
									AT4G39250	AT3G16660	0.0327746
									AT3G26790	AT3G16660	0.0325116
									AT1G49560	AT4G30650	0.0377489
									AT4G25490	AT4G30650	0.0372023
									AT2G28500	AT4G30650	0.0369801
									AT3G02380	AT4G30650	0.0359949
									AT4G39250	AT4G30650	0.0356423
									AT2G22770	AT4G30650	0.0336242
									AT1G19510	AT4G30650	0.03342
									AT3G51910	AT4G37520	0.0361578
									AT2G47890	AT4G37520	0.0353773
									AT3G02380	AT4G37520	0.0351877
									AT5G24110	AT4G37520	0.0351652
									AT3G04420	AT4G37520	0.0328956
									AT4G37180	AT4G37520	0.0325489
									AT1G18330	AT4G37520	0.0321302
									AT1G68840	AT4G37520	0.032108
									AT3G02380	AT3G63160	0.0361489
									AT3G51910	AT3G63160	0.0350385
									AT3G11020	AT3G63160	0.0342316
									AT1G68840	AT3G63160	0.0338416
									AT5G46830	AT3G63160	0.0335444
									AT1G04990	AT3G63160	0.0326343
									AT2G46680	AT3G63160	0.0323706
									AT2G47890	AT3G63160	0.0313793
									AT2G28500	AT3G63160	0.0312286
									AT5G24110	AT3G63160	0.030917
									AT1G04990	AT1G70560	0.0361164
									AT1G49560	AT1G70560	0.0346006
									AT1G18330	AT1G70560	0.0340068
									AT3G51910	AT1G70560	0.0315099
									AT3G51910	AT2G39710	0.0357759
									AT2G47890	AT2G39710	0.0333912
									AT2G22770	AT2G39710	0.0332786
									AT2G31730	AT2G39710	0.0320852
									AT3G02380	AT2G39710	0.0318827
									AT4G25480	AT2G39710	0.0318241
									AT1G18330	AT2G39710	0.0312978
									AT2G46680	AT2G39710	0.0310697
									AT3G51910	AT5G10170	0.0351838
									AT2G28500	AT5G10170	0.0344315
									AT3G11020	AT5G10170	0.0340845
									AT4G37180	AT5G10170	0.0336351
									AT2G22770	AT5G10170	0.0336289
									AT4G39250	AT5G10170	0.0328135
									AT2G46680	AT5G10170	0.0320493
									AT2G31730	AT5G10170	0.0316257
									AT1G19510	AT5G10170	0.0314296
									AT5G46830	AT5G10170	0.031351
									AT4G25490	AT5G10170	0.0302536

## Sheet: Os GRNs
	-Fe				suf				+Fe
	OsTF	target	weight		OsTF	target	weight		OsTF	target	weight
	Os03g0659700	Os12g0590500	0.131605		Os09g0474000	Os06g0163701	0.137577		Os02g0139000	Os08g0112300	0.130255
	Os03g0659700	Os01g0273100	0.129374		Os02g0139000	Os08g0412800	0.132991		Os02g0139000	Os08g0412700	0.128335
	Os03g0659700	Os03g0587200	0.128218		Os09g0379600	Os01g0348900	0.13226		Os01g0218100	Os08g0412700	0.122863
	Os03g0327800	Os05g0247800	0.12183		Os02g0139000	Os01g0348900	0.116685		Os01g0218100	Os10g0389300	0.124358
	Os03g0659700	Os01g0176500	0.120323		Os02g0139000	Os04g0511200	0.13009		Os02g0139000	Os10g0389300	0.107555
	Os03g0659700	Os06g0122200	0.117924		Os09g0379600	Os04g0511200	0.11659		Os01g0218100	Os09g0442400	0.121248
	Os03g0659700	Os03g0162200	0.116891		Os09g0379600	Os12g0464400	0.123019		Os01g0695900	Os10g0527400	0.118334
	Os03g0659700	Os02g0489800	0.115625		Os02g0139000	Os12g0464400	0.11005		Os01g0695900	Os08g0156000	0.117387
	Os03g0659700	Os05g0210500	0.114584		Os02g0139000	Os11g0454300	0.119411		Os01g0695900	Os08g0529100	0.117148
	Os03g0659700	Os01g0685900	0.11201		Os08g0546800	Os11g0454300	0.103295		Os01g0218100	Os12g0608500	0.114399
	Os03g0659700	Os01g0544450	0.10852		Os09g0379600	Os11g0454300	0.101575		Os01g0695900	Os12g0608500	0.101811
	Os03g0659700	Os11g0128400	0.108016		Os02g0139000	Os10g0389300	0.119152		Os02g0139000	Os06g0697200	0.111301
	Os03g0659700	Os10g0104900	0.106289		Os01g0218100	Os10g0389300	0.110702		Os02g0149900	Os01g0661750	0.110387
	Os03g0659700	Os08g0101100	0.101935		Os02g0603600	Os05g0148500	0.114851		Os03g0164300	Os06g0142300	0.107258
	Os03g0659700	Os09g0521100	0.101548		Os02g0139000	Os05g0542500	0.113481		Os06g0728700	Os06g0142300	0.104225
	Os03g0659700	Os02g0113200	0.0989692		Os08g0546800	Os05g0542500	0.105115		Os09g0434500	Os09g0319800	0.105791
	Os02g0579000	Os04g0438600	0.0965634		Os02g0139000	Os08g0412700	0.111669		Os04g0557800	Os09g0319800	0.0914263
	Os05g0500600	Os01g0620301	0.095607		Os09g0379600	Os08g0412700	0.109972		Os01g0218100	Os03g0718800	0.104635
	Os06g0663500	Os04g0524300	0.0913882		Os01g0218100	Os08g0412700	0.105083		Os03g0657400	Os12g0218600	0.103634
	Os12g0592300	Os06g0142350	0.0912373		Os01g0192300	Os03g0718800	0.106281		Os01g0140700	Os12g0218600	0.0944565
	Os03g0820300	Os03g0264075	0.0907775		Os01g0192300	Os03g0305600	0.104864		Os02g0139000	Os07g0638400	0.103174
	Os03g0327800	Os11g0658900	0.0901772		Os09g0481700	Os06g0289900	0.104185		Os01g0218100	Os07g0638400	0.102035
	Os03g0659700	Os09g0383300	0.0884394		Os09g0379600	Os11g0303800	0.103757		Os04g0557800	Os09g0498700	0.103012
	Os10g0560700	Os07g0127500	0.0883856		Os01g0975300	Os08g0374000	0.103402		Os01g0695900	Os04g0627900	0.102263
	Os03g0135700	Os11g0614400	0.0864886		Os11g0175700	Os07g0142802	0.103231		Os08g0159500	Os12g0178633	0.100139
	Os06g0226500	Os03g0742900	0.0860164		Os10g0536100	Os01g0594800	0.102964		Os03g0183200	Os03g0361600	0.0985905
	Os02g0579000	Os10g0160600	0.0835418		Os12g0515500	Os06g0652100	0.101939		Os01g0218100	Os10g0492900	0.0978007
	Os02g0233200	Os12g0240900	0.0834439		Os05g0195700	Os06g0652100	0.0962426		Os02g0139000	Os10g0492900	0.0938321
	Os06g0562300	Os11g0546600	0.0821096		Os01g0196300	Os02g0124501	0.100733		Os01g0218100	Os03g0151500	0.0967042
	Os06g0226500	Os06g0679500	0.0809064		Os12g0105600	Os02g0124501	0.100653		Os01g0196300	Os11g0514500	0.0965038
	Os06g0226500	Os06g0131500	0.0801925		Os03g0764900	Os01g0555100	0.100338		Os02g0139000	Os01g0606900	0.0963973
	Os03g0659700	Os06g0131500	0.0740367		Os01g0218100	Os05g0381400	0.0961623		Os01g0305900	Os10g0196000	0.0960628
	Os02g0285900	Os12g0258700	0.0786777		Os11g0175700	Os05g0381400	0.0844072		Os01g0305900	Os02g0671100	0.0954564
	Os08g0174500	Os12g0258700	0.0699698		Os05g0343400	Os06g0161400	0.0954882		Os01g0695900	Os01g0949800	0.0949052
	Os08g0174500	Os09g0431750	0.0779269		Os09g0287000	Os09g0319800	0.0941669		Os09g0309700	Os01g0627800	0.0946509
	Os03g0609500	Os09g0351700	0.0776631		Os09g0434500	Os09g0319800	0.0824755		Os01g0196300	Os04g0653700	0.0933811
	Os02g0656600	Os09g0351700	0.0764261		Os07g0680400	Os11g0474900	0.0940939		Os01g0218100	Os11g0184800	0.0924584
	Os03g0659700	Os03g0570100	0.0774245		Os12g0156100	Os11g0227100	0.093867		Os08g0386200	Os04g0385600	0.0922015
	Os03g0659700	Os01g0708700	0.0770131		Os03g0183200	Os03g0114100	0.0927838		Os03g0183200	Os04g0387000	0.0920228
	Os04g0550200	Os02g0769100	0.0769313		Os01g0975300	Os01g0638600	0.0925678		Os04g0557800	Os01g0594800	0.0916757
	Os06g0284500	Os01g0904500	0.076879		Os09g0379600	Os10g0492900	0.0922421		Os01g0695900	Os10g0528300	0.0906563
	Os03g0113500	Os11g0645800	0.0763281		Os01g0218100	Os10g0492900	0.0823452		Os02g0139000	Os03g0233900	0.0904185
	Os08g0536800	Os11g0645800	0.0711555		Os08g0442400	Os04g0282400	0.0917548		Os01g0140700	Os02g0245800	0.0902816
	Os05g0579600	Os04g0153200	0.0761832		Os03g0657400	Os04g0282400	0.0841444		Os01g0218100	Os09g0483400	0.089713
	Os03g0164300	Os04g0153200	0.0706862		Os01g0218100	Os01g0962100	0.0909484		Os01g0695900	Os09g0483400	0.0844035
	Os06g0226500	Os05g0269200	0.0760684		Os01g0192300	Os01g0962100	0.0844073		Os08g0416000	Os04g0598900	0.0892586
	Os08g0174500	Os07g0218200	0.075681		Os01g0192300	Os08g0423600	0.0906888		Os02g0139000	Os03g0776900	0.0892109
	Os06g0519400	Os04g0354600	0.0756234		Os10g0536100	Os08g0423600	0.0796778		Os01g0695900	Os03g0776900	0.0784297
	Os02g0656600	Os05g0462000	0.0748199		Os09g0379600	Os05g0438800	0.0897058		Os02g0149900	Os02g0527500	0.0891894
	Os06g0284500	Os02g0712800	0.0747901		Os11g0175700	Os05g0438800	0.0844958		Os03g0183200	Os03g0114100	0.0890516
	Os07g0158500	Os11g0645400	0.074338		Os09g0434500	Os03g0808200	0.0892923		Os01g0975300	Os04g0359100	0.0888803
	Os01g0192300	Os08g0423600	0.0742848		Os03g0183200	Os04g0387000	0.0891297		Os08g0485700	Os04g0359100	0.0794779
	Os04g0489600	Os11g0118400	0.0742719		Os03g0764900	Os05g0409500	0.0883067		Os08g0159500	Os04g0359100	0.0772947
	Os03g0609500	Os03g0234500	0.0741897		Os01g0713600	Os08g0239900	0.0882274		Os01g0935000	Os07g0586100	0.0886774
	Os09g0481700	Os08g0455900	0.0741322		Os09g0474000	Os08g0239900	0.0794049		Os04g0541700	Os07g0586100	0.0803986
	Os01g0292900	Os08g0455900	0.0643001		Os05g0572000	Os03g0319400	0.0874805		Os01g0140700	Os11g0427700	0.0886671
	Os02g0579000	Os05g0519300	0.0736494		Os08g0386200	Os04g0667600	0.0873216		Os04g0590400	Os11g0427700	0.0883445
	Os01g0192300	Os08g0425800	0.0736287		Os09g0522200	Os04g0667600	0.0789525		Os03g0657400	Os11g0427700	0.0797581
	Os03g0609500	Os03g0139500	0.0733655		Os04g0610400	Os04g0667600	0.0776177		Os01g0218100	Os05g0438800	0.0879904
	Os01g0192300	Os08g0423500	0.072582		Os07g0680400	Os10g0570200	0.0872952		Os04g0541700	Os05g0438800	0.0864657
	Os02g0695200	Os09g0442400	0.0725812		Os03g0657400	Os10g0570200	0.0772321		Os02g0139000	Os05g0438800	0.0853443
	Os03g0820300	Os09g0442400	0.0657525		Os04g0541700	Os09g0557500	0.0872855		Os09g0481700	Os08g0455900	0.0878696
	Os03g0327800	Os12g0448900	0.0723861		Os09g0509700	Os09g0557500	0.0787108		Os04g0590400	Os10g0162838	0.0873673
	Os08g0174500	Os12g0448900	0.0668703		Os11g0175700	Os03g0307200	0.0868511		Os03g0657400	Os04g0338950	0.0871476
	Os03g0327800	Os12g0437800	0.07238		Os06g0662200	Os11g0136400	0.086765		Os04g0569100	Os01g0949900	0.0870355
	Os03g0720800	Os02g0744650	0.0722316		Os09g0334500	Os06g0160700	0.0865466		Os01g0695900	Os01g0949900	0.0849882
	Os03g0135700	Os08g0501700	0.0717841		Os07g0683200	Os06g0160700	0.0843298		Os05g0579700	Os11g0210201	0.086572
	Os03g0188400	Os04g0291900	0.0716278		Os03g0657400	Os04g0154800	0.0864493		Os03g0164300	Os12g0493900	0.0861793
	Os07g0680400	Os12g0628600	0.0714192		Os10g0376900	Os01g0706900	0.0864116		Os09g0309700	Os04g0364800	0.0860415
	Os03g0113500	Os12g0601300	0.0711597		Os12g0105600	Os01g0111700	0.086274		Os04g0541700	Os11g0181800	0.085981
	Os03g0327800	Os03g0650900	0.0710686		Os01g0196300	Os12g0222300	0.0861561		Os01g0218100	Os02g0740500	0.0855349
	Os03g0164300	Os06g0142200	0.070703		Os11g0705200	Os11g0427700	0.0847692		Os02g0139000	Os02g0740500	0.0750906
	Os10g0376900	Os10g0511200	0.0703733		Os04g0590400	Os11g0427700	0.0753935		Os01g0218100	Os03g0724500	0.0851921
	Os08g0159500	Os04g0359100	0.0703213		Os07g0680400	Os12g0628600	0.0846924		Os04g0569100	Os03g0723400	0.0848177
	Os05g0488600	Os01g0524400	0.0699403		Os01g0140700	Os09g0325700	0.0844137		Os01g0575200	Os03g0723400	0.0833594
	Os05g0500600	Os08g0414700	0.0699265		Os01g0192300	Os03g0820500	0.0841846		Os01g0584900	Os07g0130100	0.0838123
	Os02g0285900	Os10g0504900	0.0697706		Os01g0218100	Os03g0820500	0.0806308		Os05g0183100	Os07g0130100	0.0770823
	Os03g0659700	Os10g0504900	0.0607657		Os04g0541700	Os03g0820500	0.0768496		Os01g0196300	Os07g0130100	0.0758611
	Os06g0562300	Os10g0554800	0.0693371		Os08g0546800	Os03g0820500	0.0744838		Os09g0309700	Os08g0423600	0.0832769
	Os09g0286600	Os01g0825800	0.0688593		Os01g0218100	Os05g0201700	0.0840075		Os01g0975300	Os08g0375400	0.0832608
	Os04g0489600	Os01g0825800	0.0617359		Os07g0680400	Os07g0129300	0.0839257		Os09g0481700	Os08g0375400	0.0789457
	Os02g0174300	Os12g0556300	0.0687688		Os01g0826400	Os12g0566000	0.0836899		Os08g0485700	Os08g0375400	0.0725233
	Os03g0164300	Os05g0214300	0.0686121		Os09g0481700	Os12g0566000	0.0726824		Os01g0218100	Os03g0604566	0.083125
	Os10g0376900	Os01g0215750	0.0685926		Os09g0522200	Os07g0114000	0.0836146		Os04g0541700	Os03g0604566	0.0768706
	Os01g0192300	Os11g0229100	0.0684827		Os08g0386200	Os07g0114000	0.0820307		Os01g0695900	Os08g0155900	0.0828941
	Os08g0174500	Os01g0933300	0.0680819		Os07g0683200	Os07g0490100	0.0835074		Os01g0218100	Os08g0155900	0.0774241
	Os09g0481700	Os01g0933300	0.0588381		Os09g0334500	Os07g0490100	0.0829661		Os04g0541700	Os10g0173000	0.0828219
	Os03g0820300	Os08g0523200	0.0680744		Os04g0541700	Os10g0173000	0.0827965		Os01g0305900	Os05g0130100	0.0826471
	Os03g0109000	Os05g0202800	0.0679328		Os01g0192300	Os10g0173000	0.0726468		Os09g0309700	Os10g0551800	0.0825703
	Os03g0659700	Os08g0189600	0.0677633		Os05g0572000	Os03g0764000	0.0827117		Os07g0680400	Os11g0474800	0.0824437
	Os04g0590400	Os08g0351200	0.0677183		Os02g0132500	Os03g0764000	0.0762219		Os04g0569100	Os06g0473800	0.082408
	Os07g0688200	Os12g0152100	0.0676737		Os04g0569100	Os06g0493600	0.0819162		Os01g0935000	Os06g0473800	0.0753897
	Os03g0820300	Os03g0406900	0.0673225		Os10g0376900	Os10g0511200	0.0819155		Os04g0541700	Os06g0473800	0.0710962
	Os03g0231950	Os03g0746000	0.0672547		Os09g0509700	Os10g0511200	0.0715349		Os04g0541700	Os02g0834800	0.0822253
	Os09g0431900	Os09g0472700	0.0671378		Os07g0680400	Os01g0186600	0.081796		Os04g0569100	Os02g0834800	0.0807553
	Os04g0489600	Os04g0688500	0.0671147		Os01g0975300	Os01g0186600	0.0770191		Os06g0728700	Os04g0562100	0.0822253
	Os06g0663500	Os01g0179600	0.0670125		Os05g0183100	Os01g0186600	0.0705074		Os01g0935000	Os03g0648500	0.0820764
	Os03g0327800	Os07g0217600	0.0667755		Os05g0553400	Os01g0186600	0.069903		Os04g0569100	Os03g0648500	0.080884
	Os05g0488600	Os02g0557800	0.0666588		Os03g0764900	Os02g0803600	0.0809199		Os01g0218100	Os02g0503900	0.0817439
	Os01g0935000	Os07g0543300	0.0664414		Os05g0195700	Os02g0803600	0.0718793		Os04g0541700	Os02g0503900	0.0769992
	Os01g0140700	Os03g0665700	0.0663764		Os03g0657400	Os07g0417200	0.0808753		Os01g0575200	Os02g0503900	0.0728637
	Os01g0292900	Os08g0531000	0.0661777		Os05g0488600	Os05g0398000	0.0807172		Os09g0309700	Os01g0178500	0.0817412
	Os03g0113500	Os03g0170701	0.0661559		Os12g0105600	Os01g0297200	0.0806105		Os03g0764900	Os08g0543000	0.0812677
	Os05g0488600	Os05g0398000	0.0658134		Os09g0379600	Os01g0595600	0.0803505		Os03g0657400	Os01g0382000	0.0812465
	Os04g0493000	Os05g0398000	0.0561005		Os01g0218100	Os01g0595600	0.0747934		Os08g0485700	Os08g0531000	0.080875
	Os06g0226500	Os04g0654600	0.0655643		Os02g0139000	Os01g0595600	0.0684885		Os01g0975300	Os08g0531000	0.0700371
	Os03g0135700	Os04g0654600	0.0651286		Os12g0105600	Os08g0331000	0.0803065		Os05g0361700	Os07g0440900	0.0807933
	Os04g0541700	Os01g0767600	0.0655411		Os01g0826400	Os05g0111300	0.0793826		Os01g0695900	Os03g0826800	0.0807315
	Os01g0192300	Os01g0767600	0.0637906		Os01g0975300	Os05g0111300	0.076365		Os02g0139000	Os03g0826800	0.0701668
	Os06g0519400	Os01g0767600	0.0630811		Os09g0481700	Os05g0111300	0.0747902		Os04g0541700	Os04g0565200	0.0804264
	Os03g0657400	Os01g0562600	0.0654674		Os01g0192300	Os08g0423500	0.0793417		Os07g0158500	Os12g0106000	0.0803086
	Os03g0188400	Os04g0340300	0.0651016		Os08g0442400	Os08g0423500	0.0698135		Os09g0334500	Os12g0106000	0.0734727
	Os08g0536800	Os03g0672300	0.0649652		Os03g0657400	Os10g0491400	0.0792594		Os06g0166400	Os12g0106000	0.0721588
	Os06g0226500	Os03g0672300	0.0607696		Os02g0603600	Os10g0491400	0.0682625		Os06g0166400	Os10g0498000	0.0800678
	Os03g0659700	Os03g0672300	0.0598211		Os01g0192300	Os02g0503900	0.0792153		Os04g0541700	Os02g0226200	0.0800198
	Os03g0327800	Os06g0304300	0.0649493		Os11g0175700	Os02g0503900	0.0735681		Os02g0132500	Os01g0259933	0.079985
	Os08g0159500	Os10g0530500	0.0648043		Os01g0575200	Os02g0503900	0.0685159		Os10g0376900	Os01g0259933	0.071789
	Os05g0525900	Os12g0637000	0.0646886		Os01g0218100	Os02g0503900	0.0678186		Os04g0541700	Os01g0259933	0.0693676
	Os02g0649300	Os05g0438800	0.0646823		Os08g0386200	Os01g0864500	0.0791005		Os02g0132500	Os03g0764000	0.0799501
	Os06g0519400	Os05g0438800	0.061041		Os04g0610400	Os01g0864500	0.0732067		Os01g0975300	Os06g0289900	0.0794209
	Os11g0175700	Os05g0438800	0.0557808		Os01g0192300	Os03g0287100	0.0790863		Os09g0481700	Os06g0289900	0.07053
	Os01g0975300	Os10g0368100	0.0645516		Os11g0175700	Os03g0287100	0.0685048		Os01g0695900	Os04g0462600	0.0793672
	Os01g0975300	Os08g0375400	0.0644984		Os07g0680400	Os11g0474800	0.0788053		Os02g0132500	Os04g0462600	0.0763555
	Os09g0481700	Os08g0375400	0.0555102		Os01g0975300	Os11g0474800	0.0730205		Os10g0376900	Os02g0617800	0.0792368
	Os08g0174500	Os08g0375400	0.0552228		Os05g0553400	Os11g0474800	0.0709164		Os08g0159500	Os02g0617800	0.0703022
	Os12g0592300	Os05g0428100	0.0644796		Os01g0975300	Os02g0690600	0.0787594		Os08g0386200	Os07g0114000	0.0792054
	Os05g0572000	Os01g0946700	0.0644721		Os11g0175700	Os10g0465700	0.0787562		Os06g0726300	Os07g0114000	0.0708733
	Os08g0174500	Os01g0946700	0.0592783		Os01g0218100	Os10g0465700	0.0704408		Os08g0159500	Os10g0530500	0.078298
	Os06g0562300	Os02g0809300	0.0644471		Os10g0376900	Os10g0483500	0.0785974		Os08g0562300	Os05g0111300	0.0781513
	Os03g0820300	Os02g0809300	0.0548051		Os09g0434500	Os11g0161700	0.0781885		Os04g0541700	Os03g0820500	0.0781191
	Os04g0489600	Os05g0517600	0.0642288		Os06g0662200	Os11g0161700	0.07627		Os01g0935000	Os03g0820500	0.0770499
	Os03g0109000	Os05g0517600	0.0606519		Os04g0569100	Os02g0186800	0.0780564		Os04g0569100	Os03g0820500	0.0714471
	Os09g0287000	Os09g0319800	0.0641483		Os09g0522200	Os03g0255900	0.0778162		Os01g0218100	Os03g0820500	0.0708299
	Os02g0656600	Os09g0319800	0.0610473		Os09g0334500	Os03g0255900	0.0705326		Os07g0680400	Os07g0129300	0.0780254
	Os01g0511000	Os06g0315300	0.0638921		Os04g0590400	Os04g0569000	0.0778053		Os08g0485700	Os06g0215950	0.0777667
	Os07g0617000	Os06g0315300	0.0566365		Os05g0488600	Os12g0538600	0.0777678		Os01g0975300	Os06g0215950	0.0718262
	Os06g0663500	Os11g0562100	0.0637728		Os03g0764900	Os12g0628100	0.0775739		Os04g0557800	Os11g0245800	0.0777484
	Os08g0536800	Os03g0201500	0.0637612		Os05g0195700	Os12g0628100	0.0669388		Os01g0867300	Os12g0130200	0.0777254
	Os06g0562300	Os03g0201500	0.0557294		Os01g0975300	Os05g0202800	0.077505		Os11g0684000	Os12g0130200	0.0738932
	Os02g0649300	Os11g0107000	0.0637225		Os05g0195700	Os01g0232000	0.0769503		Os07g0683200	Os12g0130200	0.0681487
	Os06g0519400	Os11g0107000	0.0590149		Os01g0975300	Os12g0555200	0.0768987		Os01g0975300	Os12g0115500	0.0775771
	Os02g0695200	Os11g0107000	0.0546642		Os03g0657400	Os12g0555200	0.0725442		Os08g0386200	Os02g0205500	0.0773643
	Os09g0287000	Os06g0294000	0.0636864		Os05g0553400	Os12g0555200	0.0682888		Os01g0218100	Os02g0484200	0.0772963
	Os03g0659700	Os04g0641101	0.0636723		Os09g0522200	Os02g0736900	0.0768029		Os01g0575200	Os02g0484200	0.0705632
	Os07g0680400	Os04g0178300	0.0636024		Os04g0610400	Os02g0736900	0.0661742		Os08g0159500	Os09g0518000	0.0772154
	Os03g0109000	Os01g0893400	0.0635954		Os02g0638650	Os01g0656200	0.0766684		Os06g0726300	Os01g0864200	0.0769413
	Os02g0603600	Os11g0229500	0.063472		Os05g0195700	Os10g0140300	0.0764586		Os06g0726300	Os01g0956200	0.0769171
	Os01g0975300	Os05g0113400	0.0634437		Os08g0546800	Os03g0604566	0.0764442		Os05g0442700	Os05g0202800	0.0766095
	Os01g0192300	Os03g0718800	0.0634244		Os01g0192300	Os03g0604566	0.0744855		Os08g0159500	Os05g0202800	0.0752728
	Os11g0490900	Os11g0587600	0.0634179		Os01g0218100	Os03g0604566	0.0707611		Os04g0557800	Os12g0260500	0.0764628
	Os03g0657400	Os10g0570200	0.0633844		Os04g0541700	Os03g0604566	0.066154		Os09g0309700	Os03g0574900	0.0764426
	Os07g0680400	Os10g0570200	0.0614412		Os01g0625300	Os11g0454200	0.0761391		Os11g0684000	Os11g0133001	0.076389
	Os01g0975300	Os03g0439500	0.0633322		Os02g0139000	Os11g0454200	0.0705551		Os01g0867300	Os11g0133001	0.071147
	Os01g0292900	Os03g0439500	0.0616038		Os01g0713600	Os11g0454200	0.0662756		Os01g0196300	Os12g0222300	0.0763765
	Os09g0481700	Os03g0439500	0.0615985		Os07g0225300	Os12g0280801	0.0757521		Os05g0183100	Os12g0222300	0.068538
	Os06g0562300	Os06g0481200	0.0632375		Os03g0815100	Os12g0280801	0.0735031		Os06g0726300	Os09g0434900	0.0763676
	Os06g0703900	Os07g0412100	0.0630053		Os01g0218100	Os08g0151900	0.075521		Os07g0158500	Os07g0689600	0.0763273
	Os06g0226500	Os07g0691700	0.0629674		Os05g0572000	Os12g0629700	0.0754699		Os01g0867300	Os06g0547400	0.0761905
	Os03g0113500	Os07g0691700	0.0589361		Os05g0572000	Os07g0127500	0.0754229		Os09g0434500	Os04g0538400	0.0761434
	Os08g0174500	Os01g0601700	0.0628687		Os01g0575200	Os03g0723400	0.0754222		Os07g0680400	Os04g0127100	0.0760642
	Os03g0764900	Os09g0424200	0.0628193		Os01g0140700	Os03g0723400	0.0746374		Os05g0442700	Os03g0197100	0.0755168
	Os03g0609500	Os02g0102300	0.0627501		Os10g0536100	Os03g0723400	0.0686388		Os02g0806300	Os07g0448100	0.0754705
	Os02g0656600	Os02g0102300	0.0624131		Os09g0434500	Os03g0723400	0.0648242		Os10g0376900	Os10g0511200	0.0754484
	Os10g0536100	Os02g0102300	0.053895		Os08g0442400	Os05g0535566	0.0753336		Os02g0132500	Os10g0511200	0.0724061
	Os10g0376900	Os01g0332100	0.0627196		Os09g0434500	Os01g0341750	0.0753193		Os10g0376900	Os10g0483500	0.0754319
	Os08g0159500	Os04g0459500	0.0625227		Os05g0195700	Os12g0427600	0.0752673		Os08g0159500	Os10g0483500	0.0662023
	Os02g0579000	Os03g0751100	0.0622552		Os12g0515500	Os12g0427600	0.0664613		Os09g0434500	Os06g0702000	0.0753068
	Os10g0490400	Os03g0751100	0.0566338		Os02g0603600	Os07g0639900	0.0752656		Os02g0132500	Os06g0702000	0.0657979
	Os01g0524500	Os03g0751100	0.0552141		Os08g0386200	Os10g0550900	0.0752398		Os02g0564700	Os06g0702000	0.064503
	Os06g0226500	Os02g0794500	0.0620918		Os09g0334500	Os10g0550900	0.0653498		Os09g0481700	Os01g0822800	0.0752471
	Os03g0659700	Os02g0794500	0.0607273		Os01g0975300	Os07g0178700	0.0751391		Os01g0575200	Os09g0325700	0.0752219
	Os03g0109000	Os01g0570601	0.0620287		Os01g0192300	Os09g0351700	0.0750534		Os03g0657400	Os09g0325700	0.0667687
	Os04g0550200	Os01g0570601	0.0556981		Os10g0536100	Os09g0351700	0.0748735		Os08g0485700	Os09g0325700	0.0653434
	Os01g0292900	Os09g0482900	0.0619591		Os01g0218100	Os09g0351700	0.0639236		Os09g0434500	Os09g0325700	0.0641658
	Os03g0609500	Os01g0350000	0.0617038		Os05g0488600	Os03g0733200	0.0749571		Os04g0489600	Os09g0325700	0.064101
	Os02g0656600	Os01g0350000	0.0593171		Os01g0192300	Os06g0110200	0.074948		Os05g0183100	Os03g0356526	0.0750637
	Os08g0159500	Os12g0291100	0.0616456		Os11g0175700	Os06g0110200	0.0638684		Os08g0159500	Os05g0500500	0.0750562
	Os10g0376900	Os12g0291100	0.0536578		Os07g0680400	Os04g0127100	0.0746636		Os08g0485700	Os05g0500500	0.0693181
	Os08g0537900	Os12g0291100	0.0535023		Os01g0192300	Os01g0194600	0.0746334		Os01g0975300	Os05g0500500	0.0648202
	Os04g0493000	Os12g0291100	0.0525447		Os04g0541700	Os01g0194600	0.0666588		Os04g0541700	Os11g0454000	0.074948
	Os01g0192300	Os02g0622500	0.0614254		Os01g0218100	Os01g0194600	0.0651054		Os01g0218100	Os01g0128200	0.0749421
	Os11g0490900	Os06g0254600	0.0612808		Os09g0410700	Os10g0578200	0.0745589		Os04g0541700	Os01g0128200	0.071861
	Os07g0683200	Os06g0254600	0.05804		Os10g0376900	Os04g0179700	0.0745582		Os04g0569100	Os01g0128200	0.0679577
	Os02g0638650	Os09g0555500	0.0612539		Os12g0105600	Os05g0576600	0.0745581		Os08g0159500	Os11g0127800	0.07488
	Os03g0109000	Os09g0555500	0.0550109		Os09g0334500	Os05g0576600	0.0660268		Os05g0579700	Os06g0724700	0.0747369
	Os03g0188400	Os02g0320800	0.0611564		Os03g0657400	Os02g0569900	0.0744202		Os08g0386200	Os08g0504700	0.0747236
	Os10g0560700	Os07g0162700	0.0610971		Os07g0680400	Os02g0569900	0.0735622		Os04g0557800	Os07g0181100	0.0742236
	Os07g0158500	Os07g0599600	0.0608426		Os01g0975300	Os02g0569900	0.0720758		Os04g0489600	Os09g0538000	0.074163
	Os11g0490900	Os04g0209200	0.060826		Os03g0815100	Os10g0109600	0.0743699		Os09g0286600	Os09g0538000	0.0692087
	Os02g0695200	Os10g0492900	0.0607702		Os11g0175700	Os02g0823100	0.074338		Os09g0572000	Os09g0538000	0.0670843
	Os01g0192300	Os10g0492900	0.0532191		Os10g0376900	Os09g0491820	0.0741049		Os10g0376900	Os01g0706900	0.0741199
	Os11g0175700	Os10g0492900	0.0520614		Os12g0515500	Os07g0273301	0.0739137		Os08g0159500	Os01g0706900	0.0724998
	Os08g0536800	Os05g0398800	0.0607092		Os09g0522200	Os07g0273301	0.0631833		Os02g0139000	Os03g0803100	0.0741031
	Os03g0113500	Os05g0398800	0.0523566		Os04g0569100	Os05g0468800	0.0739075		Os08g0159500	Os01g0974200	0.0740435
	Os05g0537100	Os05g0576600	0.060621		Os08g0546800	Os05g0468800	0.0737062		Os04g0569100	Os01g0606000	0.074002
	Os08g0386200	Os05g0576600	0.0558298		Os04g0541700	Os05g0468800	0.0644979		Os02g0564700	Os01g0606000	0.0659394
	Os02g0638650	Os01g0656200	0.0605815		Os07g0680400	Os01g0337500	0.0737196		Os05g0195700	Os12g0427600	0.0738197
	Os01g0928000	Os01g0656200	0.0538701		Os09g0434500	Os06g0702000	0.0736663		Os09g0334500	Os08g0478700	0.0737523
	Os08g0442400	Os11g0173366	0.0605624		Os01g0192300	Os01g0216000	0.0736368		Os06g0726300	Os08g0478700	0.0661455
	Os07g0680400	Os07g0129300	0.0605456		Os01g0192300	Os03g0298300	0.0735856		Os08g0386200	Os08g0478700	0.0642681
	Os10g0560700	Os08g0256300	0.0605305		Os10g0376900	Os11g0298000	0.0735628		Os07g0680400	Os11g0474900	0.0736166
	Os11g0175700	Os07g0484500	0.0605085		Os05g0572000	Os11g0298000	0.0663039		Os07g0158500	Os11g0474900	0.0641896
	Os03g0820300	Os07g0484500	0.0603277		Os03g0764900	Os11g0298000	0.0652597		Os01g0305900	Os02g0629000	0.0734724
	Os06g0562300	Os07g0484500	0.0517707		Os10g0376900	Os07g0678300	0.0734477		Os07g0680400	Os12g0628600	0.0734246
	Os06g0226500	Os06g0546500	0.060389		Os03g0764900	Os07g0678300	0.0662557		Os05g0442700	Os01g0175700	0.0731599
	Os03g0188400	Os06g0546500	0.053519		Os04g0540200	Os04g0387300	0.0733966		Os01g0975300	Os06g0604300	0.0730528
	Os06g0519400	Os08g0189850	0.0603862		Os04g0541700	Os08g0335500	0.0731561		Os08g0485700	Os06g0604300	0.0702324
	Os08g0174500	Os08g0189850	0.0541484		Os11g0175700	Os08g0335500	0.0691117		Os06g0726300	Os03g0255900	0.0730312
	Os05g0579600	Os03g0261100	0.0600864		Os08g0386200	Os06g0192800	0.0727881		Os09g0334500	Os03g0255900	0.0661253
	Os05g0500600	Os03g0792800	0.0600122		Os04g0610400	Os06g0192800	0.072009		Os01g0695900	Os10g0389500	0.0729269
	Os03g0445700	Os03g0792800	0.0526828		Os04g0590400	Os01g0229600	0.0726185		Os01g0584900	Os01g0297200	0.0727087
	Os10g0376900	Os01g0388000	0.0599738		Os01g0140700	Os01g0229600	0.0710952		Os05g0183100	Os01g0297200	0.0622011
	Os02g0132500	Os01g0388000	0.0587606		Os03g0657400	Os01g0229600	0.0618407		Os01g0218100	Os10g0465700	0.072673
	Os04g0550200	Os01g0388000	0.052968		Os09g0334500	Os03g0787000	0.0723542		Os03g0657400	Os10g0465700	0.0674244
	Os02g0638650	Os04g0598900	0.0599672		Os04g0610400	Os03g0787000	0.0618515		Os06g0562300	Os10g0465700	0.0646445
	Os12g0515500	Os04g0598900	0.0562824		Os09g0334500	Os10g0535600	0.0723219		Os06g0726300	Os02g0681700	0.072661
	Os10g0536100	Os02g0213100	0.0599053		Os10g0376900	Os03g0261100	0.072084		Os02g0181300	Os02g0681700	0.0651767
	Os04g0557800	Os02g0213100	0.0565588		Os12g0105600	Os01g0850550	0.0719081		Os09g0334500	Os02g0681700	0.0621977
	Os08g0174500	Os04g0664500	0.0597392		Os05g0183100	Os01g0850550	0.0619856		Os10g0376900	Os01g0388000	0.0725669
	Os09g0287000	Os02g0512000	0.0597106		Os08g0546800	Os11g0454000	0.0714658		Os02g0132500	Os01g0388000	0.0704186
	Os04g0489600	Os02g0512000	0.0577627		Os04g0541700	Os11g0454000	0.0667345		Os02g0564700	Os05g0560200	0.0725386
	Os04g0541700	Os02g0512000	0.0559413		Os10g0376900	Os01g0388000	0.071008		Os04g0569100	Os05g0560200	0.0681646
	Os09g0286600	Os02g0512000	0.0539161		Os08g0546800	Os08g0425800	0.0710068		Os04g0541700	Os05g0560200	0.0667395
	Os03g0113500	Os01g0140400	0.0596311		Os01g0192300	Os08g0425800	0.0700924		Os01g0935000	Os05g0560200	0.0652907
	Os03g0659700	Os05g0141000	0.059614		Os04g0541700	Os08g0425800	0.0624748		Os04g0557800	Os04g0525100	0.0725095
	Os07g0158500	Os07g0490100	0.0595906		Os05g0361700	Os03g0725400	0.0709369		Os09g0481700	Os11g0457300	0.0723134
	Os11g0490900	Os07g0490100	0.0515372		Os09g0522200	Os08g0478700	0.0708992		Os01g0975300	Os11g0457300	0.0641914
	Os06g0703900	Os10g0144700	0.0594579		Os08g0386200	Os08g0478700	0.068332		Os08g0485700	Os11g0457300	0.0623192
	Os03g0113500	Os07g0440100	0.0593216		Os09g0334500	Os08g0478700	0.0637878		Os12g0515500	Os12g0148700	0.0723059
	Os08g0536800	Os07g0440100	0.0557201		Os07g0680400	Os04g0468000	0.0707488		Os03g0164300	Os12g0148700	0.0661854
	Os08g0249000	Os04g0562100	0.0592692		Os03g0657400	Os04g0468000	0.0624501		Os04g0541700	Os03g0701100	0.072253
	Os12g0592300	Os04g0562100	0.0577367		Os09g0286600	Os01g0825800	0.0706387		Os08g0416000	Os04g0634400	0.0721704
	Os03g0657400	Os02g0609900	0.059196		Os03g0657400	Os02g0570400	0.0705722		Os06g0703900	Os04g0634400	0.0715674
	Os01g0975300	Os02g0609900	0.0504665		Os07g0680400	Os02g0570400	0.063109		Os05g0426200	Os11g0567600	0.0721075
	Os02g0579000	Os05g0592300	0.0590963		Os08g0416000	Os01g0613500	0.0703391		Os01g0975300	Os01g0186600	0.0720852
	Os08g0536800	Os08g0535200	0.0590884		Os03g0815100	Os01g0613500	0.0640068		Os05g0553400	Os01g0186600	0.062816
	Os03g0609500	Os02g0582900	0.0590742		Os09g0481700	Os02g0468200	0.0702867		Os07g0680400	Os01g0186600	0.0622624
	Os01g0246700	Os02g0526400	0.0590218		Os09g0334500	Os03g0664800	0.070228		Os01g0305900	Os01g0899700	0.0719643
	Os11g0175700	Os07g0142802	0.0589843		Os10g0536100	Os06g0282000	0.0702141		Os06g0562300	Os03g0679800	0.0719315
	Os01g0192300	Os07g0142802	0.058778		Os03g0657400	Os08g0444440	0.0698764		Os01g0246700	Os07g0539700	0.0718179
	Os06g0284500	Os02g0815300	0.0588417		Os01g0575200	Os08g0444440	0.0606607		Os11g0684000	Os07g0539700	0.0632263
	Os08g0249000	Os10g0169200	0.0588322		Os11g0175700	Os08g0444440	0.0602459		Os04g0590400	Os01g0627967	0.0717875
	Os02g0132500	Os01g0973100	0.0586992		Os09g0286600	Os09g0519150	0.0698661		Os09g0434500	Os01g0627967	0.0638888
	Os07g0683200	Os01g0973100	0.0578114		Os12g0515500	Os09g0519150	0.0623101		Os08g0159500	Os10g0368100	0.0717741
	Os06g0703900	Os01g0973100	0.0546299		Os11g0175700	Os09g0519150	0.0611359		Os01g0975300	Os10g0368100	0.066606
	Os03g0327800	Os01g0973100	0.0531802		Os01g0192300	Os09g0519150	0.0607769		Os08g0485700	Os10g0368100	0.0660307
	Os01g0975300	Os12g0115500	0.0586672		Os09g0509700	Os01g0388101	0.0698054		Os02g0187700	Os06g0301400	0.0717178
	Os08g0159500	Os12g0115500	0.0504575		Os10g0376900	Os01g0388101	0.0622126		Os08g0159500	Os03g0371400	0.071679
	Os05g0195700	Os03g0371000	0.0586583		Os10g0536100	Os05g0239151	0.0697791		Os01g0935000	Os03g0371400	0.0665585
	Os11g0490900	Os06g0602500	0.058606		Os01g0511000	Os06g0574200	0.0697175		Os08g0159500	Os05g0582400	0.0715299
	Os01g0246700	Os06g0602500	0.0526114		Os05g0525900	Os06g0574200	0.0690865		Os08g0485700	Os05g0582400	0.0659911
	Os03g0135700	Os03g0801300	0.0585724		Os12g0515500	Os06g0574200	0.06796		Os01g0935000	Os12g0534100	0.0714981
	Os03g0113500	Os03g0323500	0.0585418		Os05g0572000	Os03g0103300	0.0696886		Os04g0541700	Os12g0534100	0.0694929
	Os06g0226500	Os03g0323500	0.0567055		Os07g0680400	Os04g0178300	0.0696654		Os08g0159500	Os12g0534100	0.0673631
	Os03g0135700	Os03g0323500	0.0500028		Os03g0657400	Os04g0178300	0.065808		Os03g0764900	Os11g0298000	0.0714907
	Os02g0579000	Os03g0439700	0.0585265		Os10g0536100	Os12g0620100	0.0696305		Os10g0376900	Os11g0298000	0.0674555
	Os01g0292900	Os08g0507100	0.0584578		Os01g0192300	Os12g0620100	0.0670443		Os02g0132500	Os11g0298000	0.0643308
	Os01g0975300	Os08g0507100	0.0515132		Os08g0442400	Os12g0620100	0.0592161		Os04g0557800	Os07g0475900	0.0714417
	Os05g0553400	Os08g0507100	0.0503325		Os05g0322900	Os07g0585900	0.0694152		Os05g0183100	Os03g0830400	0.0714336
	Os01g0246700	Os06g0160700	0.0583774		Os09g0417600	Os07g0585900	0.0604197		Os01g0196300	Os07g0129200	0.0714167
	Os07g0683200	Os06g0160700	0.0577732		Os07g0683200	Os05g0548900	0.0691682		Os07g0688200	Os12g0152100	0.0713352
	Os11g0490900	Os06g0160700	0.05421		Os04g0541700	Os05g0460000	0.0691144		Os05g0361700	Os01g0646000	0.0713312
	Os06g0703900	Os06g0160700	0.0510054		Os01g0192300	Os05g0460000	0.0659459		Os06g0726300	Os05g0427100	0.0712793
	Os04g0541700	Os11g0454000	0.0582515		Os12g0105600	Os06g0207950	0.0690711		Os08g0485700	Os01g0947000	0.0712739
	Os11g0684000	Os11g0133001	0.0582488		Os01g0196300	Os12g0555000	0.0689608		Os04g0541700	Os02g0453000	0.0712446
	Os01g0246700	Os06g0716000	0.0582431		Os01g0975300	Os12g0555000	0.061569		Os10g0376900	Os10g0504650	0.0710631
	Os03g0720800	Os05g0473401	0.0582074		Os01g0218100	Os08g0480200	0.0688551		Os09g0434500	Os10g0504650	0.0644984
	Os01g0192300	Os02g0503900	0.0582		Os05g0183100	Os01g0934100	0.0685973		Os01g0935000	Os08g0434100	0.0710513
	Os02g0695200	Os02g0503900	0.0566706		Os02g0181300	Os01g0934100	0.059461		Os02g0564700	Os08g0434100	0.0664558
	Os05g0426200	Os11g0567600	0.0581583		Os03g0198600	Os01g0699600	0.0685132		Os08g0159500	Os08g0434100	0.0660573
	Os04g0557800	Os11g0567600	0.0541083		Os03g0764900	Os05g0140334	0.0684809		Os04g0541700	Os02g0258800	0.0710288
	Os11g0490900	Os07g0539700	0.0581176		Os05g0195700	Os05g0140334	0.0620569		Os01g0624700	Os01g0865700	0.0710112
	Os01g0246700	Os07g0539700	0.057879		Os01g0196300	Os10g0347800	0.0684722		Os07g0680400	Os02g0609900	0.0709653
	Os03g0764900	Os05g0409500	0.0580816		Os08g0386200	Os01g0864200	0.0684527		Os08g0562300	Os02g0609900	0.0612443
	Os06g0284500	Os05g0223200	0.0580808		Os04g0610400	Os01g0864200	0.0662653		Os02g0823900	Os02g0513100	0.0708576
	Os03g0609500	Os03g0204900	0.0580479		Os09g0334500	Os01g0864200	0.0595985		Os01g0975300	Os08g0374000	0.0708569
	Os01g0192300	Os03g0204900	0.0508553		Os09g0286600	Os02g0512000	0.0684513		Os08g0485700	Os08g0374000	0.0656344
	Os02g0695200	Os12g0601400	0.058014		Os01g0196300	Os06g0351500	0.0683416		Os08g0159500	Os08g0374000	0.0644513
	Os03g0659700	Os12g0601400	0.0570038		Os05g0572000	Os03g0560050	0.068284		Os03g0815100	Os10g0109600	0.0708564
	Os10g0560700	Os10g0191300	0.0578609		Os01g0185900	Os03g0225900	0.0681595		Os07g0225300	Os10g0109600	0.0602335
	Os12g0592300	Os08g0187900	0.0578321		Os01g0575200	Os05g0500200	0.0680088		Os03g0183200	Os11g0138400	0.0706884
	Os08g0174500	Os08g0425100	0.0577678		Os09g0410700	Os05g0382200	0.0677953		Os08g0159500	Os06g0234400	0.0706688
	Os03g0109000	Os08g0192100	0.0577082		Os01g0575200	Os06g0651200	0.0676897		Os08g0442400	Os11g0173366	0.0706116
	Os05g0572000	Os08g0192100	0.0500731		Os03g0183000	Os11g0609500	0.0676255		Os02g0132500	Os01g0388101	0.0705962
	Os03g0231950	Os02g0744682	0.057678		Os09g0434500	Os01g0731100	0.0675542		Os04g0569100	Os06g0493600	0.0703968
	Os04g0557800	Os02g0216300	0.0576383		Os01g0192300	Os01g0944100	0.0674746		Os01g0218100	Os08g0174300	0.0702299
	Os10g0536100	Os02g0216300	0.0556343		Os09g0334500	Os04g0142400	0.0673235		Os05g0426200	Os01g0892500	0.0701981
	Os01g0292900	Os06g0289900	0.0576214		Os12g0105600	Os04g0142400	0.0586415		Os06g0703900	Os11g0635500	0.0700864
	Os08g0174500	Os06g0289900	0.0507745		Os07g0680400	Os09g0471500	0.0672572		Os05g0444200	Os11g0635500	0.0614437
	Os09g0481700	Os06g0289900	0.0505145		Os02g0603600	Os04g0688500	0.0669822		Os06g0703900	Os04g0121100	0.0698791
	Os07g0680400	Os04g0178400	0.0576154		Os04g0489600	Os04g0688500	0.064144		Os02g0564700	Os07g0589600	0.0697591
	Os02g0174300	Os04g0178400	0.0494431		Os09g0286600	Os04g0688500	0.0628385		Os04g0590400	Os01g0959750	0.0696612
	Os01g0826400	Os05g0111300	0.0575732		Os09g0434500	Os04g0688500	0.0609398		Os09g0434500	Os01g0959750	0.0675314
	Os02g0579000	Os03g0322900	0.0574546		Os03g0764900	Os11g0289700	0.0669431		Os04g0541700	Os11g0644800	0.0696556
	Os08g0357300	Os02g0479300	0.0573654		Os04g0540200	Os11g0289700	0.0614995		Os04g0590400	Os01g0946700	0.0695384
	Os02g0132500	Os02g0479300	0.0500106		Os03g0764900	Os11g0608300	0.0668648		Os09g0481700	Os09g0333500	0.0694966
	Os03g0198600	Os01g0699600	0.057324		Os02g0132500	Os04g0429600	0.066798		Os04g0569100	Os02g0186800	0.0694928
	Os04g0557800	Os08g0526633	0.0571863		Os12g0515500	Os11g0525700	0.0666377		Os01g0935000	Os02g0186800	0.066476
	Os09g0455300	Os03g0140650	0.0570615		Os02g0638650	Os11g0525700	0.0612269		Os04g0557800	Os07g0570500	0.0694321
	Os02g0695200	Os03g0140650	0.0500976		Os09g0287000	Os10g0114300	0.0666209		Os01g0305900	Os04g0556100	0.0694188
	Os02g0132500	Os01g0648600	0.057024		Os02g0603600	Os09g0471100	0.0664152		Os03g0657400	Os12g0555200	0.0694027
	Os07g0683200	Os12g0130200	0.0570232		Os01g0141000	Os09g0471100	0.0580468		Os08g0485700	Os03g0439500	0.0693947
	Os04g0541700	Os01g0224700	0.0569683		Os08g0442400	Os10g0162842	0.0663726		Os09g0481700	Os03g0439500	0.0654801
	Os10g0536100	Os01g0224700	0.048763		Os01g0141000	Os08g0508800	0.0663446		Os01g0975300	Os03g0439500	0.0598506
	Os08g0159500	Os02g0617800	0.0569638		Os02g0603600	Os08g0508800	0.0608838		Os03g0764900	Os05g0409500	0.069347
	Os02g0695200	Os08g0320200	0.0569546		Os03g0657400	Os08g0508800	0.0584457		Os01g0196300	Os02g0303000	0.0692849
	Os07g0683200	Os06g0249350	0.0569462		Os10g0562900	Os08g0508800	0.0570625		Os06g0726300	Os06g0651000	0.0692123
	Os08g0174500	Os06g0249350	0.0521371		Os09g0334500	Os03g0830400	0.0662267		Os08g0159500	Os03g0851700	0.06921
	Os10g0536100	Os02g0768300	0.05693		Os05g0183100	Os03g0830400	0.0589691		Os02g0564700	Os03g0851700	0.0629877
	Os01g0141000	Os01g0137700	0.0569241		Os02g0603600	Os01g0326100	0.0661064		Os04g0541700	Os03g0851700	0.0599482
	Os06g0663500	Os08g0536200	0.0568703		Os09g0286600	Os09g0538000	0.0660612		Os03g0657400	Os08g0507100	0.0692009
	Os01g0975300	Os11g0684700	0.0568316		Os09g0410700	Os09g0538000	0.0575053		Os01g0975300	Os08g0507100	0.0611878
	Os01g0292900	Os11g0684700	0.0525261		Os07g0680400	Os04g0127200	0.0660374		Os05g0553400	Os08g0507100	0.0604152
	Os07g0178600	Os08g0170100	0.0566864		Os01g0218100	Os08g0174300	0.0660345		Os04g0590400	Os01g0229600	0.0691796
	Os04g0557800	Os08g0170100	0.0495118		Os01g0192300	Os08g0174300	0.0646392		Os03g0657400	Os01g0229600	0.0683444
	Os03g0659700	Os06g0110200	0.0566459		Os07g0680400	Os07g0654500	0.0660249		Os01g0140700	Os01g0229600	0.0643619
	Os01g0975300	Os01g0638600	0.0565269		Os09g0417600	Os07g0654500	0.0561963		Os07g0680400	Os01g0940700	0.0689164
	Os11g0490900	Os01g0638600	0.0495506		Os05g0195700	Os08g0192300	0.0658664		Os04g0489600	Os11g0118300	0.0688725
	Os04g0489600	Os01g0537250	0.0565253		Os08g0546800	Os04g0565200	0.0657638		Os01g0218100	Os05g0449100	0.0688703
	Os02g0603600	Os01g0537250	0.0512661		Os04g0541700	Os04g0565200	0.0634617		Os04g0489600	Os05g0449100	0.0637012
	Os08g0442400	Os01g0537250	0.0493578		Os01g0192300	Os04g0565200	0.0585093		Os09g0287000	Os05g0449100	0.0617452
	Os06g0703900	Os06g0293500	0.0564456		Os09g0379600	Os04g0565200	0.0568112		Os09g0434500	Os12g0188566	0.0687531
	Os04g0541700	Os03g0305600	0.0563828		Os04g0546800	Os09g0115900	0.0652432		Os04g0590400	Os03g0654700	0.0687465
	Os01g0935000	Os03g0305600	0.051793		Os07g0680400	Os01g0564300	0.0652205		Os09g0434500	Os03g0654700	0.0655868
	Os08g0159500	Os09g0305300	0.0563644		Os05g0183100	Os03g0804500	0.0650352		Os01g0575200	Os03g0654700	0.061934
	Os06g0519400	Os05g0151300	0.056331		Os09g0434500	Os01g0827800	0.065008		Os01g0140700	Os03g0654700	0.0618365
	Os01g0292900	Os12g0566000	0.056304		Os02g0603600	Os01g0827800	0.0582409		Os03g0657400	Os03g0654700	0.0609353
	Os09g0481700	Os12g0566000	0.0501052		Os09g0286600	Os02g0240300	0.0648433		Os04g0489600	Os03g0654700	0.0585965
	Os05g0572000	Os11g0298000	0.0562017		Os09g0287000	Os02g0240300	0.0604616		Os09g0309700	Os06g0715300	0.0685974
	Os10g0376900	Os11g0298000	0.053154		Os01g0192300	Os02g0240300	0.0603967		Os01g0218100	Os06g0715300	0.0657803
	Os01g0928000	Os11g0298000	0.0531155		Os08g0442400	Os02g0240300	0.0556486		Os01g0218100	Os07g0639400	0.0685883
	Os02g0132500	Os11g0298000	0.0525242		Os09g0417600	Os08g0138200	0.0648251		Os01g0695900	Os03g0841600	0.0685318
	Os03g0135700	Os10g0457200	0.0561335		Os12g0105600	Os08g0138200	0.0632008		Os05g0579700	Os03g0841600	0.0626116
	Os06g0226500	Os10g0457200	0.0519648		Os09g0572000	Os08g0138200	0.0575415		Os10g0376900	Os02g0174900	0.0684973
	Os08g0536800	Os10g0457200	0.0486417		Os09g0522200	Os02g0703600	0.0648036		Os08g0159500	Os02g0174900	0.0634253
	Os09g0417600	Os04g0581000	0.0560948		Os04g0610400	Os02g0703600	0.0613088		Os02g0149900	Os02g0174900	0.0603691
	Os03g0182800	Os04g0581000	0.0495942		Os09g0286600	Os10g0409400	0.0645976		Os09g0286600	Os11g0118400	0.0684512
	Os08g0386200	Os04g0581000	0.0494019		Os04g0489600	Os10g0409400	0.0570967		Os09g0287000	Os11g0118400	0.0592249
	Os07g0683200	Os01g0717400	0.0560436		Os09g0509700	Os08g0528700	0.0645657		Os08g0159500	Os11g0498600	0.0684486
	Os04g0557800	Os01g0717400	0.0559301		Os05g0572000	Os08g0528700	0.0609708		Os08g0562300	Os01g0570601	0.068432
	Os05g0537100	Os01g0717400	0.0478896		Os09g0522200	Os03g0797400	0.0645286		Os01g0975300	Os01g0933300	0.0684199
	Os11g0490900	Os01g0717400	0.0476921		Os03g0657400	Os04g0316200	0.0644105		Os08g0485700	Os01g0933300	0.0634861
	Os02g0638650	Os11g0525700	0.0560375		Os03g0815100	Os10g0531400	0.0640939		Os09g0481700	Os01g0933300	0.0615974
	Os01g0511000	Os11g0525700	0.0533572		Os07g0225300	Os10g0531400	0.0571616		Os07g0158500	Os02g0569900	0.0683978
	Os01g0298400	Os11g0525700	0.0525373		Os06g0662200	Os01g0846300	0.0640894		Os01g0975300	Os02g0569900	0.0680004
	Os12g0515500	Os11g0525700	0.0486846		Os09g0286600	Os01g0846300	0.0599023		Os07g0680400	Os02g0569900	0.0664164
	Os04g0590400	Os05g0375466	0.0560044		Os11g0175700	Os04g0630400	0.0639811		Os03g0657400	Os02g0569900	0.0594014
	Os04g0541700	Os05g0375466	0.053389		Os01g0192300	Os04g0630400	0.0570296		Os01g0246700	Os02g0575900	0.0682733
	Os10g0376900	Os05g0375466	0.0507965		Os09g0334500	Os01g0213400	0.0639739		Os08g0416000	Os01g0613500	0.0680816
	Os05g0426200	Os09g0468150	0.0559251		Os09g0287000	Os01g0546400	0.0638964		Os04g0541700	Os05g0460000	0.0678272
	Os02g0221100	Os03g0679800	0.0559232		Os05g0572000	Os08g0189600	0.063868		Os01g0218100	Os05g0460000	0.0594172
	Os06g0562300	Os03g0679800	0.0532783		Os05g0572000	Os01g0314800	0.0638578		Os06g0726300	Os03g0787000	0.0677268
	Os05g0474800	Os03g0679800	0.0505342		Os04g0541700	Os01g0314800	0.0605242		Os04g0489600	Os08g0423500	0.0677011
	Os06g0226500	Os07g0681700	0.0559096		Os01g0192300	Os01g0314800	0.0581648		Os04g0557800	Os08g0423500	0.0642057
	Os08g0536800	Os07g0681700	0.0524638		Os04g0569100	Os01g0314800	0.0577034		Os08g0442400	Os08g0423500	0.0634498
	Os03g0135700	Os07g0681700	0.0479231		Os09g0410700	Os01g0314800	0.0549402		Os04g0541700	Os04g0412500	0.0676916
	Os03g0113500	Os01g0118600	0.0558951		Os03g0764900	Os06g0109300	0.0637777		Os04g0590400	Os04g0603900	0.0676746
	Os10g0560700	Os06g0727400	0.055799		Os04g0569100	Os06g0109300	0.0565068		Os02g0564700	Os05g0541000	0.0676301
	Os07g0680400	Os11g0474900	0.0557409		Os11g0175700	Os07g0283125	0.0637772		Os01g0935000	Os05g0541000	0.0649813
	Os09g0287000	Os02g0207100	0.0557282		Os04g0541700	Os07g0283125	0.055605		Os04g0541700	Os05g0541000	0.0615196
	Os12g0515500	Os02g0207100	0.0498549		Os09g0509700	Os07g0283125	0.0549526		Os08g0159500	Os08g0207500	0.0675463
	Os03g0764100	Os02g0207100	0.0477555		Os07g0680400	Os11g0475000	0.0637488		Os05g0426200	Os08g0207500	0.0612317
	Os01g0246700	Os07g0462800	0.055677		Os05g0195700	Os04g0423600	0.0636549		Os07g0225300	Os10g0344000	0.0675229
	Os06g0703900	Os07g0462800	0.0487454		Os05g0488600	Os04g0423600	0.0556647		Os04g0557800	Os02g0216300	0.0675146
	Os05g0488600	Os07g0691200	0.0555677		Os09g0481700	Os01g0221600	0.0634859		Os09g0434500	Os02g0216300	0.0636134
	Os03g0182800	Os07g0691200	0.052732		Os11g0175700	Os11g0559600	0.0634183		Os08g0386200	Os05g0576600	0.0674527
	Os01g0928000	Os03g0764000	0.0555285		Os10g0536100	Os11g0173100	0.0634057		Os02g0181300	Os05g0576600	0.0612381
	Os05g0572000	Os03g0764000	0.0554601		Os11g0705200	Os08g0320100	0.0632992		Os09g0334500	Os05g0576600	0.0604735
	Os02g0132500	Os03g0764000	0.0530682		Os03g0657400	Os08g0320100	0.0547881		Os05g0183100	Os05g0576600	0.0590858
	Os04g0550200	Os03g0764000	0.0509621		Os07g0680400	Os01g0660200	0.0632903		Os05g0537100	Os05g0576600	0.05896
	Os05g0500600	Os11g0242800	0.0555226		Os01g0975300	Os01g0660200	0.0615368		Os06g0649000	Os01g0301900	0.067348
	Os07g0683200	Os04g0655400	0.0554955		Os01g0975300	Os09g0246300	0.063247		Os04g0590400	Os03g0775650	0.06733
	Os01g0185900	Os01g0916000	0.0554188		Os03g0437200	Os09g0246300	0.0572699		Os04g0541700	Os03g0775650	0.0579793
	Os04g0517100	Os01g0916000	0.0501613		Os05g0553400	Os09g0246300	0.0539747		Os01g0218100	Os03g0775650	0.0577038
	Os03g0182800	Os01g0916000	0.0496951		Os02g0706600	Os07g0541800	0.063232		Os05g0442700	Os07g0541200	0.0673068
	Os02g0285900	Os10g0389100	0.055332		Os04g0546800	Os02g0631100	0.0632263		Os09g0434500	Os01g0224700	0.0672413
	Os05g0426200	Os11g0676500	0.0553176		Os09g0481700	Os02g0631100	0.0546408		Os10g0376900	Os01g0224700	0.0603664
	Os04g0541700	Os06g0134400	0.055259		Os01g0975300	Os09g0541000	0.0631562		Os07g0680400	Os01g0678000	0.0671988
	Os02g0649300	Os06g0153200	0.0552133		Os10g0376900	Os09g0541000	0.0579229		Os03g0198600	Os05g0491200	0.0671608
	Os06g0226500	Os06g0153200	0.0523535		Os10g0376900	Os05g0217700	0.0630676		Os01g0584900	Os03g0586400	0.0671201
	Os11g0175700	Os06g0153200	0.049911		Os03g0657400	Os03g0126700	0.0630362		Os09g0309700	Os03g0291500	0.0671156
	Os08g0159500	Os11g0171300	0.0552101		Os04g0546800	Os02g0175950	0.0630181		Os08g0386200	Os04g0405300	0.0670867
	Os07g0683200	Os01g0699100	0.0551979		Os01g0625300	Os07g0509800	0.0626675		Os04g0517100	Os04g0405300	0.0640989
	Os03g0659700	Os10g0489000	0.055168		Os02g0603600	Os07g0509800	0.0564031		Os09g0287000	Os08g0458200	0.0670622
	Os08g0537900	Os11g0136400	0.0550993		Os03g0437200	Os07g0509800	0.0537067		Os09g0286600	Os08g0458200	0.0573656
	Os03g0711100	Os11g0136400	0.0522012		Os01g0192300	Os04g0366000	0.0626017		Os02g0638650	Os11g0707100	0.0668442
	Os05g0572000	Os01g0810800	0.0549441		Os04g0489600	Os04g0684100	0.0625424		Os04g0557800	Os06g0673700	0.0668137
	Os08g0159500	Os11g0121500	0.0549133		Os01g0218100	Os04g0684100	0.0617392		Os05g0426200	Os06g0673700	0.0664045
	Os09g0286600	Os09g0538000	0.0547781		Os09g0434500	Os04g0684100	0.0550908		Os05g0442700	Os02g0690600	0.0668073
	Os06g0226500	Os03g0591300	0.0547746		Os03g0860100	Os04g0556500	0.0624804		Os01g0584900	Os02g0690600	0.0586668
	Os12g0515500	Os03g0591300	0.0540297		Os01g0298400	Os04g0556500	0.05426		Os08g0159500	Os10g0479100	0.0667807
	Os02g0149900	Os10g0483500	0.0546309		Os09g0481700	Os11g0547800	0.0624676		Os06g0562300	Os06g0714400	0.0667058
	Os10g0376900	Os10g0483500	0.0537088		Os01g0975300	Os11g0547800	0.057795		Os04g0517100	Os01g0201100	0.0666689
	Os11g0707300	Os10g0483500	0.0465642		Os05g0183100	Os05g0439400	0.0623718		Os04g0590400	Os08g0103000	0.0666224
	Os02g0132500	Os07g0687900	0.054557		Os09g0334500	Os05g0439400	0.0584633		Os10g0376900	Os08g0103000	0.0646546
	Os11g0175700	Os11g0559600	0.0545216		Os02g0181300	Os05g0439400	0.0538717		Os02g0149900	Os01g0221100	0.0665637
	Os01g0292900	Os06g0214800	0.0544447		Os02g0603600	Os11g0229500	0.0623649		Os02g0132500	Os03g0233000	0.0665549
	Os02g0178100	Os04g0534600	0.054422		Os09g0434500	Os11g0229500	0.0544976		Os01g0584900	Os09g0129500	0.0664332
	Os03g0659700	Os01g0606900	0.0544025		Os08g0416000	Os08g0185900	0.0622118		Os12g0515500	Os04g0223500	0.0663077
	Os02g0695200	Os01g0606900	0.0475216		Os12g0105600	Os08g0185900	0.0529908		Os04g0541700	Os04g0223500	0.0586489
	Os05g0537100	Os03g0664800	0.0543988		Os10g0376900	Os03g0197100	0.0621862		Os08g0442400	Os04g0223500	0.0572055
	Os02g0181300	Os03g0664800	0.0514282		Os01g0975300	Os03g0197100	0.0592403		Os04g0541700	Os08g0335500	0.0663021
	Os08g0159500	Os04g0531750	0.0542728		Os07g0558100	Os12g0261300	0.0620905		Os04g0590400	Os05g0375466	0.0663006
	Os08g0537900	Os04g0531750	0.0471111		Os10g0536100	Os04g0525100	0.0619748		Os08g0442400	Os01g0340801	0.0662965
	Os05g0537100	Os03g0743500	0.0542597		Os12g0515500	Os05g0140300	0.0619677		Os09g0286600	Os01g0340801	0.0660403
	Os08g0386200	Os03g0743500	0.0531797		Os09g0287000	Os05g0140300	0.0612101		Os09g0287000	Os01g0340801	0.0585205
	Os02g0181300	Os03g0743500	0.0487774		Os07g0683200	Os03g0843800	0.0619186		Os08g0485700	Os05g0143700	0.0662898
	Os06g0284500	Os08g0170200	0.0541598		Os02g0181300	Os03g0843800	0.0540704		Os05g0442700	Os05g0143700	0.0622806
	Os12g0515500	Os12g0495525	0.0539782		Os10g0376900	Os01g0974200	0.0618723		Os01g0975300	Os05g0143700	0.0599446
	Os08g0159500	Os10g0479100	0.053851		Os12g0105600	Os12g0211900	0.0618244		Os04g0540200	Os08g0185701	0.0662629
	Os02g0178100	Os02g0206100	0.0538333		Os09g0417600	Os12g0211900	0.0601444		Os04g0541700	Os05g0560900	0.0660915
	Os06g0663500	Os12g0117900	0.053706		Os09g0410700	Os04g0365100	0.0617254		Os01g0218100	Os05g0560900	0.0622047
	Os08g0504000	Os12g0117900	0.0481892		Os01g0185900	Os04g0365100	0.0556655		Os01g0695900	Os05g0560900	0.0609678
	Os04g0590400	Os12g0117900	0.0472127		Os03g0437200	Os03g0849900	0.0617207		Os03g0657400	Os07g0142802	0.0660617
	Os06g0728700	Os03g0100100	0.0536843		Os10g0562900	Os02g0275200	0.0616947		Os04g0541700	Os07g0142802	0.0617619
	Os12g0515500	Os03g0100100	0.0493328		Os02g0706600	Os05g0537400	0.0615228		Os09g0286600	Os07g0142802	0.0612922
	Os07g0225300	Os01g0975900	0.0536212		Os09g0287000	Os08g0458200	0.0614702		Os07g0158500	Os11g0106700	0.0658484
	Os05g0536250	Os06g0232300	0.0534109		Os09g0286600	Os08g0458200	0.0566277		Os06g0166400	Os11g0106700	0.0586275
	Os09g0417600	Os03g0667100	0.0534003		Os11g0603000	Os06g0699301	0.061459		Os01g0246700	Os06g0602500	0.0657008
	Os03g0182800	Os12g0127200	0.053341		Os02g0603600	Os06g0699301	0.0596419		Os11g0684000	Os06g0602500	0.0618325
	Os05g0322900	Os12g0127200	0.0523729		Os04g0489600	Os06g0699301	0.0571323		Os05g0442700	Os05g0113400	0.0656657
	Os08g0386200	Os12g0127200	0.0513947		Os03g0657400	Os06g0699301	0.0568886		Os01g0975300	Os05g0113400	0.0624641
	Os04g0517100	Os12g0127200	0.0489805		Os07g0617000	Os06g0699301	0.0562585		Os08g0485700	Os05g0113400	0.0593923
	Os08g0159500	Os05g0582400	0.0533246		Os01g0141000	Os06g0699301	0.0523233		Os10g0376900	Os09g0491820	0.0656575
	Os03g0109000	Os05g0582400	0.0477979		Os12g0156100	Os07g0690900	0.0614514		Os06g0166400	Os03g0160000	0.0656407
	Os10g0551200	Os05g0582400	0.0470767		Os09g0410700	Os07g0690900	0.052779		Os05g0361700	Os03g0855700	0.0656247
	Os01g0192300	Os03g0298300	0.0532207		Os09g0287000	Os04g0683700	0.0614223		Os12g0515500	Os03g0855700	0.0572684
	Os01g0511000	Os01g0110100	0.0531643		Os03g0860100	Os04g0683700	0.0555826		Os03g0657400	Os10g0570200	0.0656215
	Os05g0565900	Os01g0947000	0.0531586		Os02g0654700	Os04g0683700	0.0528533		Os01g0975300	Os10g0570200	0.0608302
	Os01g0975300	Os01g0651400	0.0531274		Os01g0196300	Os06g0640599	0.0612927		Os01g0695900	Os03g0267000	0.0656009
	Os01g0292900	Os01g0651400	0.0507224		Os04g0546800	Os06g0640599	0.0594743		Os04g0541700	Os03g0267000	0.0634161
	Os09g0481700	Os01g0651400	0.0457347		Os02g0181300	Os07g0673400	0.0612378		Os02g0564700	Os03g0267000	0.0598275
	Os01g0140700	Os09g0403300	0.0531122		Os09g0287000	Os07g0673400	0.0610326		Os04g0569100	Os03g0267000	0.0593934
	Os03g0182800	Os07g0585900	0.0530073		Os09g0334500	Os07g0673400	0.0534869		Os01g0935000	Os03g0267000	0.0580683
	Os05g0322900	Os07g0585900	0.0526667		Os02g0654700	Os07g0673400	0.0533918		Os01g0218100	Os03g0267000	0.0560739
	Os01g0975300	Os04g0154800	0.0529855		Os01g0196300	Os04g0509400	0.0611746		Os09g0286600	Os03g0400800	0.0655876
	Os03g0609500	Os07g0639400	0.052982		Os05g0183100	Os04g0509400	0.0568116		Os03g0764900	Os03g0400800	0.0621887
	Os10g0376900	Os05g0380200	0.0529551		Os05g0183100	Os02g0717600	0.0611669		Os01g0218100	Os01g0194600	0.065493
	Os07g0683200	Os02g0227100	0.0529106		Os09g0334500	Os02g0717600	0.0565252		Os01g0935000	Os01g0194600	0.065041
	Os07g0680400	Os01g0186600	0.0529071		Os10g0376900	Os09g0570800	0.0610207		Os04g0569100	Os01g0194600	0.0635384
	Os05g0553400	Os01g0186600	0.0522478		Os04g0590400	Os09g0570800	0.0579141		Os08g0159500	Os01g0194600	0.06082
	Os11g0490900	Os01g0186600	0.0506432		Os10g0536100	Os09g0570800	0.0523346		Os04g0541700	Os01g0194600	0.0607472
	Os03g0657400	Os01g0186600	0.0502208		Os09g0287000	Os08g0539700	0.060754		Os04g0590400	Os04g0649600	0.0654758
	Os01g0292900	Os01g0186600	0.0466644		Os10g0376900	Os10g0190500	0.0607215		Os07g0688200	Os07g0656600	0.065258
	Os12g0515500	Os12g0473900	0.0528825		Os09g0410700	Os01g0217500	0.0605975		Os01g0140700	Os06g0651200	0.0651918
	Os01g0292900	Os07g0522500	0.0528207		Os03g0437200	Os01g0916100	0.0603638		Os01g0575200	Os06g0651200	0.0647794
	Os02g0221100	Os07g0522500	0.0453071		Os09g0509700	Os03g0701100	0.060236		Os03g0657400	Os06g0651200	0.0645372
	Os08g0159500	Os09g0439500	0.0528		Os04g0541700	Os03g0701100	0.0596559		Os04g0590400	Os06g0651200	0.0630668
	Os08g0537900	Os02g0726600	0.0527783		Os01g0218100	Os03g0701100	0.0561638		Os04g0489600	Os06g0651200	0.0562413
	Os10g0376900	Os02g0726600	0.0450742		Os01g0192300	Os03g0701100	0.0545501		Os02g0806300	Os08g0138900	0.0650582
	Os04g0493000	Os07g0614300	0.052711		Os10g0376900	Os10g0148400	0.0602096		Os03g0657400	Os07g0687900	0.0650489
	Os09g0572000	Os07g0614300	0.0501339		Os09g0572000	Os10g0148400	0.0583453		Os08g0159500	Os03g0826900	0.0650479
	Os08g0442400	Os04g0366000	0.0526493		Os01g0826400	Os10g0148400	0.0544708		Os04g0541700	Os03g0826900	0.0637831
	Os01g0192300	Os04g0366000	0.0487816		Os01g0298400	Os07g0210000	0.0601635		Os01g0584900	Os03g0826900	0.0596611
	Os10g0562100	Os01g0232000	0.0526194		Os02g0638650	Os07g0210000	0.0562998		Os01g0218100	Os03g0826900	0.0567937
	Os12g0612700	Os10g0208500	0.052561		Os12g0515500	Os07g0210000	0.0528005		Os04g0557800	Os02g0213100	0.065004
	Os07g0683200	Os10g0208500	0.0481204		Os03g0657400	Os04g0400700	0.0601289		Os02g0132500	Os02g0213100	0.0562412
	Os04g0541700	Os02g0258800	0.0525337		Os08g0442400	Os04g0400700	0.0564693		Os04g0569100	Os02g0617700	0.0649312
	Os01g0298400	Os11g0136450	0.0525108		Os03g0437200	Os03g0244700	0.0600761		Os04g0541700	Os02g0617700	0.0554044
	Os01g0511000	Os11g0136450	0.0482066		Os01g0140700	Os03g0244700	0.0580801		Os09g0309700	Os01g0944100	0.0648776
	Os02g0638650	Os11g0136450	0.047835		Os03g0657400	Os07g0539100	0.0600202		Os08g0159500	Os12g0105300	0.0648539
	Os12g0515500	Os11g0136450	0.0467307		Os09g0287000	Os08g0106000	0.0599847		Os01g0867300	Os04g0659300	0.0648446
	Os10g0376900	Os01g0706900	0.052472		Os09g0334500	Os04g0121800	0.0599729		Os07g0158500	Os04g0659300	0.0580814
	Os04g0493000	Os01g0706900	0.0484498		Os02g0181300	Os04g0121800	0.0586405		Os01g0196300	Os05g0464400	0.0648367
	Os03g0327800	Os02g0230875	0.0524451		Os08g0386200	Os04g0121800	0.0558973		Os10g0376900	Os04g0179700	0.0648346
	Os01g0975300	Os12g0534200	0.0524337		Os12g0105600	Os04g0121800	0.052532		Os02g0603600	Os04g0179700	0.0551588
	Os08g0159500	Os12g0534200	0.0450603		Os03g0183200	Os01g0605700	0.0598755		Os05g0537100	Os11g0108932	0.0647842
	Os05g0488600	Os12g0538600	0.0523635		Os03g0764900	Os09g0424200	0.0597902		Os04g0541700	Os03g0287100	0.0646924
	Os12g0515500	Os12g0538600	0.0511915		Os05g0572000	Os09g0424200	0.0551128		Os01g0218100	Os03g0287100	0.0570802
	Os03g0182800	Os12g0538600	0.046808		Os09g0509700	Os09g0424200	0.0513395		Os03g0657400	Os03g0287100	0.0565966
	Os03g0657400	Os04g0692800	0.052297		Os04g0590400	Os08g0526633	0.0597807		Os01g0218100	Os03g0139500	0.0646335
	Os07g0680400	Os06g0316800	0.0522931		Os10g0536100	Os08g0526633	0.0516917		Os09g0434500	Os05g0554000	0.0644234
	Os01g0975300	Os06g0316800	0.0512973		Os03g0657400	Os03g0650200	0.059749		Os04g0541700	Os05g0554000	0.0580666
	Os07g0158500	Os06g0316800	0.0498577		Os04g0489600	Os03g0650200	0.0563497		Os04g0590400	Os05g0554000	0.0571058
	Os03g0231950	Os05g0500200	0.0522737		Os09g0434500	Os03g0650200	0.051968		Os04g0489600	Os04g0688500	0.0643153
	Os06g0519400	Os05g0500200	0.0467756		Os07g0680400	Os04g0288100	0.0597108		Os09g0434500	Os04g0688500	0.0626945
	Os05g0488600	Os03g0733200	0.0521926		Os09g0434500	Os01g0701700	0.0595774		Os02g0603600	Os04g0688500	0.0573036
	Os02g0221100	Os12g0571400	0.0520822		Os05g0183100	Os12g0221400	0.0595076		Os05g0537100	Os05g0439400	0.0641807
	Os04g0590400	Os09g0570800	0.0520732		Os09g0417600	Os12g0221400	0.0516392		Os02g0181300	Os05g0439400	0.0615061
	Os10g0536100	Os09g0570800	0.0472131		Os06g0662200	Os07g0448100	0.0593419		Os06g0726300	Os05g0439400	0.0593008
	Os01g0298400	Os11g0568800	0.0520031		Os01g0192300	Os07g0448100	0.0521119		Os05g0183100	Os05g0439400	0.0549851
	Os01g0975300	Os11g0568800	0.0442785		Os04g0517100	Os03g0122300	0.0593362		Os01g0625300	Os02g0596300	0.0641738
	Os01g0192300	Os01g0216000	0.0519954		Os05g0322900	Os03g0122300	0.0558361		Os06g0166400	Os02g0596300	0.0566858
	Os10g0376900	Os08g0103000	0.0519478		Os03g0198600	Os12g0432600	0.0592721		Os01g0935000	Os07g0115500	0.0641034
	Os10g0536100	Os08g0103000	0.0504119		Os04g0610400	Os12g0432600	0.0533248		Os04g0541700	Os07g0115500	0.0589636
	Os02g0579000	Os01g0800900	0.0519267		Os03g0437200	Os09g0561500	0.0591955		Os06g0703900	Os07g0552800	0.0640967
	Os03g0135700	Os06g0536850	0.0518687		Os04g0517100	Os09g0561500	0.0576031		Os07g0683200	Os07g0552800	0.0612313
	Os11g0175700	Os01g0974100	0.0518433		Os05g0322900	Os01g0597800	0.0591328		Os01g0246700	Os07g0552800	0.0595445
	Os01g0192300	Os01g0974100	0.0444037		Os11g0705200	Os01g0597800	0.0550139		Os05g0579700	Os07g0552800	0.0579419
	Os06g0519400	Os02g0722600	0.051785		Os01g0816100	Os01g0597800	0.0544407		Os06g0562300	Os11g0670900	0.0640657
	Os02g0638650	Os02g0448000	0.0517753		Os10g0536100	Os02g0261400	0.0591204		Os08g0386200	Os02g0736900	0.0640412
	Os01g0141000	Os03g0756500	0.0517072		Os09g0509700	Os02g0261400	0.0554083		Os06g0726300	Os02g0736900	0.0605354
	Os09g0455300	Os02g0537800	0.0516738		Os10g0376900	Os02g0261400	0.0533357		Os09g0334500	Os01g0733001	0.0639746
	Os08g0536800	Os02g0537800	0.0502051		Os03g0764900	Os02g0261400	0.0528624		Os05g0537100	Os01g0934100	0.0639743
	Os08g0504000	Os02g0537800	0.0488226		Os06g0662200	Os10g0389100	0.0590042		Os02g0603600	Os11g0229500	0.0639594
	Os02g0178100	Os06g0635200	0.0516531		Os08g0442400	Os10g0109300	0.0589541		Os09g0434500	Os11g0229500	0.0548136
	Os10g0490400	Os06g0635200	0.0490179		Os07g0680400	Os12g0431100	0.0589441		Os09g0287000	Os02g0512000	0.0639069
	Os04g0493000	Os06g0635200	0.0456148		Os01g0975300	Os12g0431100	0.0541467		Os04g0489600	Os02g0512000	0.0592084
	Os08g0159500	Os04g0448600	0.0516473		Os05g0553400	Os12g0431100	0.0538964		Os09g0286600	Os02g0512000	0.0584152
	Os08g0537900	Os04g0448600	0.0461853		Os10g0376900	Os08g0462900	0.0589053		Os02g0139000	Os02g0512000	0.0552191
	Os11g0707300	Os02g0174900	0.051631		Os04g0489600	Os08g0462900	0.0513593		Os04g0541700	Os02g0512000	0.0551731
	Os08g0159500	Os02g0174900	0.0494629		Os01g0975300	Os06g0110000	0.0589023		Os12g0515500	Os11g0614500	0.063901
	Os10g0376900	Os02g0174900	0.0494389		Os04g0489600	Os02g0625300	0.0588274		Os04g0541700	Os11g0614500	0.0565533
	Os05g0474800	Os09g0306232	0.0516032		Os10g0376900	Os02g0625300	0.0553652		Os01g0584900	Os03g0322200	0.063894
	Os03g0820300	Os09g0306232	0.0490963		Os04g0541700	Os02g0258800	0.0588262		Os02g0603600	Os12g0548800	0.0638884
	Os07g0680400	Os09g0551400	0.0515839		Os08g0546800	Os03g0400700	0.058754		Os09g0481700	Os12g0548800	0.0548995
	Os07g0680400	Os07g0614000	0.05154		Os03g0198600	Os11g0656000	0.0587272		Os04g0541700	Os01g0314800	0.0638384
	Os08g0159500	Os08g0374000	0.051486		Os01g0196300	Os11g0656000	0.050063		Os04g0569100	Os01g0314800	0.0623415
	Os01g0975300	Os08g0374000	0.0508881		Os04g0590400	Os08g0351200	0.0587026		Os01g0935000	Os01g0314800	0.0577211
	Os07g0680400	Os06g0297400	0.0513776		Os09g0434500	Os08g0351200	0.0556567		Os08g0159500	Os01g0314800	0.0561932
	Os09g0481700	Os01g0221600	0.0513683		Os10g0376900	Os08g0351200	0.0510281		Os02g0564700	Os01g0314800	0.0560755
	Os03g0109000	Os01g0221600	0.0464014		Os03g0657400	Os11g0558900	0.0586656		Os05g0426200	Os09g0468150	0.0637969
	Os04g0541700	Os08g0335500	0.0513594		Os12g0105600	Os04g0179200	0.0586256		Os04g0557800	Os09g0468150	0.0591655
	Os11g0175700	Os08g0335500	0.0500042		Os05g0553400	Os04g0179200	0.0514614		Os01g0246700	Os02g0526400	0.0637921
	Os01g0192300	Os08g0335500	0.0473223		Os04g0489600	Os05g0395000	0.0586197		Os01g0935000	Os03g0196600	0.0637703
	Os09g0417600	Os01g0678000	0.051314		Os10g0376900	Os01g0745000	0.0586132		Os04g0541700	Os03g0196600	0.057328
	Os10g0536100	Os12g0188566	0.0512839		Os04g0541700	Os01g0745000	0.0515041		Os04g0569100	Os01g0149800	0.063766
	Os03g0657400	Os02g0569900	0.0512676		Os05g0553400	Os02g0667500	0.0586076		Os06g0562300	Os04g0147600	0.06375
	Os07g0680400	Os02g0569900	0.0487364		Os09g0474000	Os02g0595300	0.0585791		Os08g0436700	Os04g0147600	0.0573586
	Os01g0975300	Os02g0569900	0.0459479		Os01g0185900	Os02g0595300	0.0507252		Os08g0159500	Os01g0945300	0.0637242
	Os07g0158500	Os02g0569900	0.0459271		Os11g0603000	Os08g0528200	0.0585094		Os04g0541700	Os08g0351200	0.063722
	Os01g0192300	Os03g0102700	0.0512616		Os03g0815100	Os08g0528200	0.0579468		Os10g0376900	Os08g0351200	0.0608258
	Os01g0575200	Os02g0156300	0.051223		Os07g0225300	Os08g0528200	0.0517609		Os04g0590400	Os08g0351200	0.0589525
	Os06g0663500	Os02g0156300	0.0452212		Os04g0590400	Os10g0559200	0.0585026		Os09g0434500	Os08g0351200	0.0543556
	Os01g0935000	Os07g0249800	0.0512076		Os11g0705200	Os02g0218600	0.0584844		Os07g0683200	Os02g0227100	0.0636561
	Os01g0524500	Os04g0481300	0.0512075		Os05g0183100	Os03g0810700	0.0584138		Os05g0569300	Os02g0227100	0.0630776
	Os08g0159500	Os04g0481300	0.0464413		Os01g0816100	Os08g0137800	0.0583699		Os12g0515500	Os06g0335975	0.0636197
	Os03g0113500	Os10g0419600	0.0511807		Os11g0705200	Os08g0137800	0.0582765		Os01g0584900	Os06g0721800	0.0634964
	Os03g0609500	Os02g0775900	0.0511753		Os02g0132500	Os01g0892500	0.0583537		Os09g0434500	Os07g0620600	0.0634622
	Os01g0192300	Os12g0438300	0.0511192		Os02g0603600	Os01g0892500	0.0524653		Os03g0657400	Os05g0500200	0.063429
	Os08g0442400	Os12g0438300	0.0473154		Os02g0603600	Os08g0378000	0.0583224		Os06g0562300	Os05g0500200	0.0578822
	Os04g0493000	Os03g0595300	0.0511138		Os06g0662200	Os08g0480000	0.0582986		Os01g0575200	Os05g0500200	0.056301
	Os08g0537900	Os03g0595300	0.0460278		Os01g0575200	Os08g0480000	0.0571804		Os01g0218100	Os05g0500200	0.0559961
	Os05g0572000	Os08g0293300	0.0510726		Os04g0489600	Os06g0223700	0.0582844		Os02g0806300	Os12g0131400	0.0634238
	Os04g0541700	Os05g0460000	0.0510719		Os09g0286600	Os06g0223700	0.0508803		Os09g0481700	Os01g0221600	0.0634081
	Os01g0192300	Os05g0460000	0.05065		Os01g0298400	Os01g0392600	0.0581915		Os01g0218100	Os07g0639500	0.0633781
	Os01g0524500	Os07g0682800	0.0510567		Os05g0343400	Os01g0392600	0.0513123		Os03g0657400	Os12g0226900	0.063345
	Os03g0659700	Os08g0421100	0.0510347		Os03g0764100	Os01g0392600	0.0502134		Os01g0935000	Os12g0226900	0.058977
	Os02g0285900	Os08g0421100	0.0487318		Os09g0410700	Os05g0366300	0.0581858		Os01g0218100	Os12g0226900	0.056352
	Os09g0431900	Os08g0421100	0.0467804		Os03g0666300	Os05g0366300	0.0572282		Os09g0481700	Os12g0566000	0.0633405
	Os01g0524500	Os06g0716700	0.0509674		Os04g0590400	Os09g0346600	0.0581594		Os08g0562300	Os12g0566000	0.05984
	Os05g0343400	Os02g0575900	0.0509667		Os10g0376900	Os09g0346600	0.0534338		Os05g0442700	Os12g0566000	0.0550326
	Os03g0657400	Os02g0570400	0.0509026		Os02g0603600	Os09g0346600	0.0519551		Os05g0569300	Os12g0566000	0.0545226
	Os01g0975300	Os02g0570400	0.0453137		Os09g0434500	Os09g0346600	0.0514821		Os08g0442400	Os10g0109300	0.0632964
	Os09g0286600	Os03g0727600	0.0508483		Os11g0603000	Os09g0346600	0.0495763		Os03g0437200	Os01g0957800	0.0632498
	Os04g0489600	Os03g0727600	0.0465816		Os06g0649000	Os11g0625900	0.0581069		Os01g0975300	Os01g0638600	0.0632306
	Os03g0182800	Os06g0493100	0.0508467		Os07g0558100	Os06g0335975	0.0579698		Os05g0442700	Os01g0638600	0.0615759
	Os05g0322900	Os06g0493100	0.0476471		Os12g0515500	Os06g0335975	0.0540138		Os03g0764900	Os07g0678300	0.0631823
	Os08g0386200	Os06g0493100	0.046084		Os01g0575200	Os01g0826000	0.0579485		Os10g0376900	Os07g0678300	0.0576642
	Os09g0417600	Os06g0493100	0.0442674		Os01g0140700	Os01g0826000	0.056094		Os10g0376900	Os10g0190500	0.0631435
	Os04g0557800	Os01g0737500	0.0508391		Os11g0705200	Os01g0826000	0.0522253		Os08g0562300	Os07g0462800	0.0631193
	Os12g0586300	Os01g0737500	0.0485358		Os12g0156100	Os05g0557400	0.0579367		Os10g0376900	Os03g0261100	0.0631053
	Os07g0680400	Os12g0431100	0.0508102		Os03g0657400	Os04g0674700	0.0579196		Os05g0579600	Os03g0261100	0.0558257
	Os03g0231950	Os01g0962100	0.0507971		Os01g0192300	Os01g0898800	0.0578559		Os09g0334500	Os03g0207400	0.0630039
	Os02g0649300	Os01g0962100	0.0499886		Os11g0175700	Os01g0898800	0.0541619		Os02g0181300	Os03g0207400	0.058168
	Os04g0557800	Os06g0282000	0.0507436		Os03g0657400	Os01g0898800	0.051145		Os05g0537100	Os03g0207400	0.0547436
	Os01g0192300	Os06g0282000	0.0478538		Os06g0662200	Os01g0898800	0.049328		Os04g0541700	Os04g0630400	0.0628673
	Os10g0536100	Os06g0282000	0.0477995		Os01g0141000	Os02g0827900	0.057841		Os05g0444200	Os03g0388432	0.0628494
	Os02g0603600	Os06g0282000	0.0431899		Os10g0562900	Os02g0827900	0.0574067		Os06g0728700	Os01g0823600	0.0628079
	Os02g0579000	Os10g0475100	0.0507368		Os02g0603600	Os02g0827900	0.0526495		Os04g0557800	Os01g0651350	0.0627287
	Os09g0286600	Os10g0475100	0.0487958		Os03g0657400	Os02g0827900	0.0517346		Os08g0159500	Os08g0269600	0.0626257
	Os01g0192300	Os10g0173000	0.050717		Os04g0590400	Os09g0497000	0.0578373		Os06g0726300	Os06g0674000	0.0625708
	Os04g0541700	Os10g0173000	0.0444008		Os10g0536100	Os09g0497000	0.0520548		Os10g0562900	Os01g0137700	0.0625664
	Os04g0557800	Os06g0673700	0.0506764		Os02g0654700	Os02g0251900	0.0578032		Os01g0141000	Os01g0137700	0.0587975
	Os09g0481700	Os09g0333500	0.0506546		Os04g0517100	Os02g0251900	0.0502132		Os04g0541700	Os07g0283125	0.0625512
	Os02g0603600	Os09g0333500	0.0469555		Os01g0141000	Os05g0495600	0.0575548		Os03g0657400	Os04g0154800	0.0624149
	Os10g0536100	Os09g0333500	0.0463158		Os02g0603600	Os05g0495600	0.0511827		Os07g0680400	Os04g0154800	0.059048
	Os11g0705200	Os02g0759700	0.0506323		Os04g0489600	Os05g0495600	0.0507246		Os12g0515500	Os03g0218500	0.0623924
	Os10g0536100	Os02g0759700	0.0464744		Os04g0610400	Os06g0683400	0.0574614		Os04g0541700	Os03g0218500	0.0617897
	Os08g0537900	Os02g0759700	0.0458125		Os08g0386200	Os06g0683400	0.0514232		Os03g0764900	Os03g0218500	0.0545079
	Os01g0140700	Os02g0245800	0.0506121		Os09g0522200	Os06g0683400	0.0506763		Os07g0680400	Os12g0431100	0.0623597
	Os02g0178100	Os02g0556800	0.0505621		Os09g0509700	Os07g0115500	0.0573452		Os08g0562300	Os12g0431100	0.0586825
	Os06g0284500	Os02g0556800	0.0453198		Os01g0192300	Os07g0115500	0.0559925		Os08g0485700	Os10g0509600	0.0623394
	Os01g0192300	Os11g0699532	0.0505564		Os01g0218100	Os07g0115500	0.0518983		Os09g0434500	Os10g0509600	0.0618966
	Os11g0175700	Os11g0699532	0.044733		Os05g0572000	Os07g0115500	0.0515569		Os03g0657400	Os10g0509600	0.0592148
	Os03g0657400	Os11g0699532	0.0440672		Os07g0680400	Os08g0351300	0.0573116		Os04g0590400	Os10g0509600	0.0564544
	Os09g0286600	Os03g0317300	0.0505122		Os08g0416000	Os04g0506800	0.057301		Os01g0575200	Os10g0509600	0.0545127
	Os03g0657400	Os03g0317300	0.0501349		Os07g0680400	Os01g0713200	0.0572879		Os04g0557800	Os10g0122600	0.0623189
	Os03g0711100	Os07g0448100	0.0504754		Os05g0553400	Os01g0713200	0.0532795		Os07g0683200	Os01g0609900	0.0623112
	Os01g0141000	Os06g0699301	0.0504738		Os12g0105600	Os01g0713200	0.0510665		Os01g0935000	Os02g0537000	0.062158
	Os07g0617000	Os06g0699301	0.0458965		Os07g0683200	Os01g0609900	0.0572097		Os04g0569100	Os02g0537000	0.0559139
	Os02g0603600	Os06g0699301	0.0456721		Os01g0975300	Os10g0456000	0.0571261		Os01g0584900	Os01g0955100	0.0621327
	Os12g0515500	Os04g0662400	0.050448		Os11g0705200	Os10g0456000	0.0533841		Os09g0434500	Os04g0684100	0.0620454
	Os08g0537900	Os04g0662400	0.0497229		Os03g0657400	Os04g0228400	0.0570683		Os04g0489600	Os04g0684100	0.0547687
	Os07g0680400	Os03g0236200	0.0504356		Os11g0175700	Os04g0228400	0.0512143		Os04g0541700	Os10g0114300	0.0618318
	Os01g0975300	Os03g0236200	0.0454981		Os05g0572000	Os03g0371400	0.0570458		Os09g0287000	Os10g0114300	0.0597325
	Os03g0764100	Os02g0632900	0.0504238		Os03g0666300	Os03g0371400	0.0554973		Os02g0132500	Os10g0114300	0.0545798
	Os06g0703900	Os01g0944700	0.0503752		Os01g0218100	Os03g0371400	0.0552401		Os04g0569100	Os04g0115700	0.0617836
	Os01g0246700	Os03g0843800	0.050322		Os01g0192300	Os03g0371400	0.0544879		Os12g0515500	Os04g0115700	0.0591027
	Os11g0490900	Os03g0843800	0.0501		Os09g0410700	Os03g0371400	0.0496907		Os06g0166400	Os12g0570400	0.0617565
	Os03g0657400	Os07g0190000	0.0502548		Os04g0541700	Os03g0371400	0.0492067		Os04g0569100	Os02g0791300	0.0617035
	Os02g0221100	Os07g0190000	0.0456787		Os08g0546800	Os02g0768300	0.0570373		Os02g0603600	Os10g0491400	0.0616897
	Os06g0663500	Os05g0586050	0.0502377		Os09g0434500	Os02g0768300	0.0568383		Os02g0181300	Os07g0673400	0.0616895
	Os03g0135700	Os05g0586050	0.0476989		Os10g0536100	Os02g0768300	0.0544419		Os04g0557800	Os11g0625801	0.0616801
	Os03g0657400	Os05g0586050	0.0439804		Os04g0590400	Os02g0768300	0.0517763		Os05g0426200	Os11g0625801	0.0599422
	Os01g0192300	Os11g0644800	0.0502002		Os04g0541700	Os02g0768300	0.0509799		Os01g0975300	Os07g0178700	0.0616121
	Os04g0541700	Os11g0644800	0.0460617		Os02g0132500	Os11g0565000	0.0570086		Os08g0485700	Os07g0178700	0.0541954
	Os11g0175700	Os11g0644800	0.0436389		Os04g0489600	Os11g0565000	0.0554675		Os10g0376900	Os05g0432200	0.0615905
	Os05g0500600	Os03g0782200	0.0501924		Os04g0590400	Os11g0565000	0.0538371		Os06g0728700	Os05g0432200	0.0586589
	Os10g0490400	Os03g0782200	0.0431759		Os09g0434500	Os11g0565000	0.0503048		Os08g0159500	Os05g0432200	0.0541873
	Os02g0178100	Os04g0507100	0.0501836		Os11g0603000	Os11g0565000	0.0486912		Os03g0815100	Os10g0531400	0.0615777
	Os02g0233200	Os04g0497200	0.050159		Os10g0536100	Os06g0725200	0.0568791		Os07g0225300	Os10g0531400	0.0587015
	Os08g0537900	Os04g0497200	0.0452392		Os09g0434500	Os06g0725200	0.0527557		Os04g0546800	Os10g0531400	0.0581588
	Os06g0519400	Os04g0127500	0.0501554		Os04g0489600	Os04g0525200	0.0568646		Os01g0196300	Os04g0509400	0.0615774
	Os06g0728700	Os07g0568700	0.0501544		Os09g0434500	Os05g0207400	0.0568392		Os05g0183100	Os04g0509400	0.0605349
	Os08g0537900	Os07g0568700	0.0484257		Os03g0764900	Os11g0614500	0.0567915		Os08g0159500	Os04g0531750	0.0615607
	Os10g0562900	Os08g0508800	0.0500893		Os12g0515500	Os11g0614500	0.0542634		Os05g0525900	Os05g0517200	0.0615342
	Os03g0657400	Os08g0508800	0.0498499		Os05g0553400	Os04g0524500	0.0567034		Os06g0728700	Os05g0517200	0.0589466
	Os02g0603600	Os08g0508800	0.0463431		Os04g0569100	Os02g0537000	0.0567031		Os05g0195700	Os05g0140334	0.0615071
	Os02g0656600	Os12g0237900	0.0500506		Os09g0509700	Os02g0537000	0.0527489		Os02g0132500	Os01g0731100	0.061442
	Os10g0536100	Os12g0237900	0.0429754		Os05g0572000	Os02g0537000	0.0483039		Os05g0579700	Os02g0758800	0.0613797
	Os08g0357300	Os10g0524600	0.0500502		Os01g0625300	Os01g0233900	0.0566936		Os01g0246700	Os02g0758800	0.052888
	Os02g0579000	Os03g0257500	0.0500187		Os01g0713600	Os01g0233900	0.0564779		Os07g0225300	Os01g0638000	0.0613398
	Os03g0327800	Os10g0416800	0.0499791		Os04g0569100	Os01g0233900	0.0527196		Os08g0386200	Os01g0638000	0.0547013
	Os06g0728700	Os01g0823600	0.049955		Os02g0139000	Os01g0233900	0.0517129		Os01g0575200	Os01g0638000	0.0535259
	Os08g0249000	Os01g0823600	0.0488887		Os09g0379600	Os01g0233900	0.0484411		Os03g0657400	Os04g0178300	0.061305
	Os01g0292900	Os12g0182500	0.0499186		Os04g0489600	Os10g0181100	0.0565792		Os07g0680400	Os04g0178300	0.0601105
	Os08g0174500	Os12g0182500	0.0425407		Os09g0434500	Os10g0181100	0.0489653		Os01g0975300	Os04g0178300	0.0579151
	Os12g0592300	Os02g0816400	0.0498709		Os11g0603000	Os10g0181100	0.0482252		Os06g0703900	Os07g0690900	0.0612361
	Os02g0285900	Os02g0816400	0.0440773		Os03g0183200	Os04g0691900	0.0565756		Os07g0688200	Os07g0690900	0.0562147
	Os03g0711100	Os02g0816400	0.0435977		Os02g0181300	Os04g0691900	0.0552338		Os02g0654700	Os07g0690900	0.0548141
	Os07g0617000	Os05g0495600	0.0498639		Os07g0680400	Os09g0537700	0.0564355		Os08g0436700	Os01g0223500	0.0612277
	Os01g0935000	Os05g0495600	0.0447865		Os05g0525900	Os09g0537700	0.0508209		Os06g0726300	Os01g0223500	0.0535389
	Os08g0442400	Os01g0326100	0.0498544		Os09g0522200	Os09g0537700	0.0490541		Os08g0485700	Os12g0115300	0.0611993
	Os02g0603600	Os01g0326100	0.0441251		Os02g0603600	Os01g0580500	0.0564042		Os03g0657400	Os12g0115300	0.057552
	Os07g0683200	Os01g0609900	0.0498393		Os04g0489600	Os01g0580500	0.0501616		Os04g0590400	Os12g0115300	0.0568018
	Os10g0490400	Os12g0131400	0.0498363		Os10g0536100	Os08g0189300	0.0562441		Os05g0343400	Os08g0457300	0.0611857
	Os05g0572000	Os07g0677500	0.0498222		Os08g0546800	Os09g0432300	0.0561654		Os07g0225300	Os08g0457300	0.0550984
	Os10g0560700	Os07g0677500	0.0460734		Os08g0416000	Os09g0432300	0.0478938		Os01g0584900	Os06g0254600	0.0611852
	Os09g0410700	Os07g0677500	0.0454062		Os09g0434500	Os01g0365000	0.0561439		Os03g0657400	Os02g0570400	0.0611768
	Os02g0132500	Os11g0565000	0.0497724		Os03g0183200	Os03g0113900	0.0561177		Os05g0553400	Os02g0570400	0.0530216
	Os04g0590400	Os11g0565000	0.0454379		Os03g0183200	Os07g0412100	0.05609		Os01g0975300	Os01g0332200	0.0611665
	Os01g0292900	Os03g0816500	0.0497708		Os09g0509700	Os09g0350900	0.0560619		Os04g0590400	Os09g0570800	0.0610456
	Os09g0481700	Os03g0816500	0.0469563		Os01g0192300	Os09g0350900	0.0506487		Os10g0376900	Os09g0570800	0.0526244
	Os07g0688200	Os08g0201700	0.0497647		Os08g0546800	Os09g0350900	0.0500266		Os04g0489600	Os08g0477500	0.0610252
	Os03g0231950	Os02g0745100	0.0497311		Os08g0442400	Os09g0350900	0.0499806		Os06g0703900	Os06g0671600	0.0609784
	Os01g0575200	Os02g0745100	0.0467949		Os04g0541700	Os09g0350900	0.0494072		Os08g0562300	Os06g0671600	0.0575587
	Os01g0192300	Os02g0745100	0.0463908		Os10g0536100	Os09g0350900	0.049047		Os01g0935000	Os06g0232600	0.0609752
	Os06g0562300	Os02g0745100	0.0451722		Os09g0286600	Os09g0350900	0.0479074		Os01g0575200	Os06g0232600	0.0570281
	Os02g0695200	Os02g0745100	0.0430049		Os09g0434500	Os05g0135400	0.0560283		Os04g0590400	Os06g0232600	0.0558424
	Os12g0586300	Os06g0317200	0.0497152		Os02g0132500	Os05g0135400	0.0515671		Os01g0140700	Os06g0232600	0.0547629
	Os03g0188400	Os06g0317200	0.0473279		Os04g0590400	Os05g0135400	0.0478627		Os03g0657400	Os04g0316200	0.060877
	Os02g0132500	Os03g0233000	0.0496993		Os10g0376900	Os02g0437300	0.0560241		Os09g0481700	Os03g0618900	0.0608699
	Os10g0376900	Os03g0233000	0.0429315		Os02g0603600	Os02g0437300	0.0524471		Os04g0569100	Os03g0618900	0.0555827
	Os11g0175700	Os03g0233000	0.0426174		Os04g0590400	Os02g0437300	0.048765		Os08g0442400	Os09g0498200	0.0607877
	Os08g0174500	Os02g0565150	0.0496975		Os04g0489600	Os02g0437300	0.0483061		Os09g0309700	Os09g0498200	0.0594278
	Os07g0178600	Os02g0633200	0.0496736		Os09g0434500	Os02g0437300	0.0482913		Os04g0557800	Os09g0498200	0.0550204
	Os03g0135700	Os09g0567800	0.0496613		Os06g0662200	Os03g0228200	0.0560135		Os07g0158500	Os01g0124100	0.0607466
	Os06g0663500	Os09g0567800	0.0478424		Os07g0683200	Os12g0443000	0.0560075		Os04g0590400	Os05g0380200	0.0607448
	Os06g0519400	Os09g0567800	0.0456056		Os09g0434500	Os01g0947700	0.0559739		Os07g0680400	Os11g0475000	0.0606762
	Os06g0519400	Os05g0424300	0.0496497		Os02g0132500	Os01g0947700	0.0552897		Os08g0159500	Os02g0774100	0.0606758
	Os10g0536100	Os05g0424300	0.0460276		Os10g0536100	Os01g0947700	0.0479301		Os06g0728700	Os02g0774100	0.0540329
	Os06g0663500	Os05g0424300	0.0441608		Os03g0183000	Os02g0240100	0.0559289		Os08g0442400	Os09g0350900	0.0606509
	Os03g0711100	Os03g0326500	0.0496105		Os09g0417600	Os09g0268800	0.0558989		Os04g0557800	Os09g0350900	0.0590249
	Os04g0493000	Os03g0326500	0.0495015		Os05g0322900	Os09g0268800	0.048357		Os09g0434500	Os09g0350900	0.0578724
	Os02g0285900	Os03g0326500	0.0448624		Os01g0192300	Os03g0218500	0.055874		Os09g0286600	Os09g0350900	0.0528536
	Os01g0292900	Os04g0666800	0.0495482		Os04g0541700	Os03g0218500	0.0556001		Os03g0183200	Os01g0214600	0.0605575
	Os01g0975300	Os04g0666800	0.0475047		Os08g0546800	Os03g0218500	0.0533177		Os06g0703900	Os01g0214600	0.0563724
	Os06g0663500	Os10g0576900	0.0495408		Os04g0489600	Os04g0565400	0.0558699		Os02g0149900	Os04g0491200	0.0604887
	Os07g0680400	Os04g0127100	0.0495258		Os11g0603000	Os04g0565400	0.0511183		Os05g0537100	Os04g0121800	0.0604812
	Os06g0284500	Os02g0199600	0.0495177		Os12g0156100	Os03g0310600	0.0558068		Os06g0726300	Os04g0121800	0.0601599
	Os01g0246700	Os05g0548900	0.0495095		Os02g0654700	Os03g0310600	0.0490769		Os05g0183100	Os04g0121800	0.0576205
	Os05g0537100	Os05g0548900	0.0421841		Os07g0680400	Os08g0140300	0.055716		Os09g0334500	Os04g0121800	0.051944
	Os01g0292900	Os06g0187500	0.0494744		Os01g0816100	Os08g0140300	0.0507184		Os03g0764900	Os02g0803600	0.0603833
	Os09g0481700	Os06g0187500	0.0478839		Os09g0481700	Os07g0543300	0.0556711		Os05g0195700	Os02g0803600	0.0567566
	Os01g0975300	Os06g0187500	0.0440933		Os03g0764900	Os07g0543300	0.0545306		Os08g0159500	Os02g0803600	0.0532265
	Os02g0174300	Os09g0471500	0.0494373		Os01g0975300	Os07g0543300	0.0501804		Os02g0221100	Os02g0803600	0.052963
	Os07g0680400	Os09g0471500	0.0429579		Os10g0376900	Os03g0834050	0.0556707		Os02g0139000	Os01g0731201	0.0603767
	Os03g0711100	Os07g0645300	0.0493919		Os04g0489600	Os03g0834050	0.0491613		Os04g0489600	Os01g0731201	0.0586918
	Os04g0493000	Os07g0645300	0.0433344		Os09g0334500	Os01g0858900	0.0554641		Os09g0434500	Os01g0731201	0.0564579
	Os02g0132500	Os04g0429600	0.0493748		Os02g0654700	Os01g0858900	0.0514122		Os09g0286600	Os01g0731201	0.0543967
	Os08g0536800	Os07g0648100	0.0493623		Os06g0662200	Os08g0138900	0.0554286		Os01g0218100	Os01g0731201	0.0530909
	Os06g0284500	Os07g0648100	0.0451191		Os03g0183200	Os04g0364800	0.0554264		Os08g0159500	Os09g0305300	0.0602248
	Os04g0546800	Os06g0231600	0.0493471		Os09g0417600	Os06g0125800	0.055419		Os01g0975300	Os09g0305300	0.0575899
	Os01g0928000	Os06g0231600	0.0442662		Os05g0322900	Os06g0125800	0.0517836		Os02g0149900	Os09g0305300	0.0535561
	Os03g0183000	Os06g0231600	0.0438876		Os04g0517100	Os06g0125800	0.0481364		Os05g0426200	Os05g0384300	0.0602113
	Os08g0249000	Os02g0791300	0.0492793		Os09g0434500	Os03g0727600	0.0554026		Os04g0557800	Os05g0384300	0.0567121
	Os08g0537900	Os02g0791300	0.0441942		Os09g0286600	Os03g0727600	0.0553075		Os07g0680400	Os04g0127200	0.060137
	Os05g0426200	Os12g0260500	0.0492548		Os12g0515500	Os12g0139400	0.0554023		Os05g0426200	Os11g0214400	0.0601273
	Os04g0557800	Os12g0260500	0.0466831		Os05g0488600	Os12g0139400	0.0529373		Os01g0575200	Os10g0529500	0.0601022
	Os09g0286600	Os03g0786500	0.0492546		Os01g0298400	Os12g0139400	0.0518548		Os01g0695900	Os10g0529500	0.0565562
	Os02g0174300	Os10g0520100	0.0492233		Os08g0416000	Os12g0139400	0.0492665		Os04g0590400	Os10g0529500	0.0556463
	Os08g0174500	Os10g0520100	0.0490247		Os02g0638650	Os12g0139400	0.0478217		Os01g0218100	Os10g0529500	0.0532267
	Os02g0132500	Os03g0834050	0.049216		Os05g0195700	Os04g0175600	0.0553288		Os04g0489600	Os10g0529500	0.0523072
	Os01g0935000	Os03g0834050	0.0448254		Os01g0575200	Os05g0494600	0.0553188		Os09g0286600	Os12g0582666	0.0600815
	Os02g0579000	Os04g0499100	0.0492154		Os09g0410700	Os05g0494600	0.0527308		Os04g0569100	Os12g0582666	0.051096
	Os03g0113500	Os04g0499100	0.0435097		Os10g0536100	Os05g0494600	0.0514433		Os01g0935000	Os04g0634800	0.0600629
	Os01g0140700	Os08g0135300	0.0492112		Os01g0140700	Os05g0494600	0.0502462		Os01g0218100	Os04g0634800	0.0531204
	Os10g0536100	Os08g0135300	0.0451483		Os01g0192300	Os07g0181100	0.0552955		Os04g0541700	Os04g0634800	0.0513261
	Os01g0192300	Os08g0135300	0.0431897		Os10g0536100	Os07g0181100	0.0549545		Os08g0485700	Os03g0261800	0.0600421
	Os01g0935000	Os08g0135300	0.0428924		Os07g0680400	Os08g0124500	0.0552832		Os05g0442700	Os03g0261800	0.0595359
	Os03g0188400	Os08g0135300	0.0421206		Os05g0343400	Os02g0526400	0.0552009		Os01g0975300	Os03g0261800	0.0526896
	Os01g0140700	Os03g0381500	0.0491758		Os02g0132500	Os03g0233000	0.0551984		Os06g0726300	Os01g0213400	0.0600371
	Os01g0575200	Os03g0381500	0.0471312		Os09g0509700	Os03g0233000	0.0526612		Os08g0386200	Os01g0213400	0.051226
	Os06g0663500	Os03g0381500	0.0434617		Os05g0553400	Os02g0562600	0.05517		Os08g0159500	Os09g0369400	0.0599683
	Os08g0504000	Os03g0381500	0.0432689		Os01g0975300	Os02g0562600	0.0489868		Os05g0426200	Os11g0609500	0.0599545
	Os03g0720800	Os03g0381500	0.0426393		Os02g0181300	Os04g0380300	0.0551395		Os10g0376900	Os08g0331800	0.0599212
	Os01g0140700	Os05g0361500	0.0491749		Os05g0343400	Os06g0239100	0.0550913		Os03g0657400	Os08g0331800	0.053153
	Os03g0182800	Os11g0264000	0.0491733		Os03g0437200	Os01g0597600	0.0550756		Os03g0183000	Os08g0331800	0.051232
	Os01g0192300	Os03g0287100	0.0491674		Os01g0826400	Os01g0597600	0.0542089		Os03g0764900	Os01g0933200	0.0599161
	Os06g0519400	Os03g0287100	0.0438335		Os01g0575200	Os01g0597600	0.0471796		Os01g0246700	Os08g0247600	0.059899
	Os11g0175700	Os03g0287100	0.0430231		Os01g0298400	Os09g0342000	0.0550684		Os08g0485700	Os08g0425500	0.0598961
	Os06g0663500	Os09g0282300	0.0491453		Os09g0334500	Os08g0247600	0.0550539		Os01g0975300	Os08g0425500	0.05255
	Os10g0376900	Os07g0663900	0.0490878		Os07g0683200	Os08g0247600	0.0517254		Os08g0386200	Os01g0915000	0.0598565
	Os04g0590400	Os07g0663900	0.0434819		Os07g0225300	Os08g0247600	0.0472322		Os01g0141000	Os09g0471100	0.0598031
	Os04g0541700	Os02g0453000	0.0490139		Os09g0417600	Os04g0468600	0.0550537		Os01g0935000	Os10g0553800	0.0597567
	Os04g0590400	Os02g0453000	0.0463323		Os05g0322900	Os04g0468600	0.0476752		Os04g0590400	Os11g0565000	0.0596967
	Os05g0474800	Os01g0373800	0.0489774		Os03g0657400	Os10g0419400	0.0549999		Os12g0515500	Os04g0662400	0.0596767
	Os03g0182800	Os06g0107100	0.0489749		Os07g0680400	Os10g0419400	0.0545502		Os08g0442400	Os04g0662400	0.0572489
	Os07g0680400	Os06g0107100	0.0433351		Os05g0183100	Os10g0419400	0.0519395		Os06g0728700	Os12g0503000	0.0596478
	Os04g0541700	Os01g0745000	0.0489698		Os03g0764100	Os01g0198000	0.0549813		Os07g0680400	Os04g0468000	0.0596448
	Os01g0192300	Os03g0400800	0.0489617		Os05g0361700	Os01g0198000	0.0471072		Os03g0657400	Os04g0468000	0.0507357
	Os12g0515500	Os03g0400800	0.0434826		Os09g0434500	Os04g0538400	0.0549731		Os08g0436700	Os06g0483200	0.0595975
	Os08g0442400	Os03g0400800	0.0433839		Os02g0132500	Os04g0538400	0.0540532		Os09g0434500	Os01g0827800	0.0595783
	Os09g0287000	Os01g0827800	0.0489499		Os08g0546800	Os04g0538400	0.0503223		Os09g0286600	Os01g0827800	0.0591292
	Os02g0603600	Os01g0827800	0.0476822		Os10g0536100	Os04g0538400	0.0502149		Os02g0603600	Os01g0827800	0.0550996
	Os04g0489600	Os01g0827800	0.0453708		Os02g0181300	Os09g0511200	0.0548965		Os05g0569300	Os05g0361500	0.0595646
	Os02g0656600	Os01g0827800	0.0435272		Os07g0683200	Os09g0511200	0.0545612		Os02g0603600	Os08g0508800	0.0595204
	Os08g0442400	Os01g0827800	0.0428214		Os03g0183000	Os09g0511200	0.0502833		Os01g0141000	Os08g0508800	0.0577309
	Os03g0720800	Os10g0161800	0.0489342		Os05g0343400	Os09g0511200	0.0484387		Os10g0562900	Os08g0508800	0.0516384
	Os06g0663500	Os10g0161800	0.048162		Os01g0185900	Os05g0104200	0.0548561		Os05g0322900	Os01g0597800	0.0594889
	Os10g0536100	Os06g0553001	0.0489145		Os10g0536100	Os05g0384300	0.0548112		Os07g0688200	Os01g0597800	0.0554498
	Os01g0575200	Os06g0553001	0.0479246		Os01g0192300	Os08g0485800	0.0547727		Os02g0806300	Os09g0272200	0.0593317
	Os01g0935000	Os06g0553001	0.0467943		Os03g0183000	Os05g0161500	0.0547513		Os01g0584900	Os01g0893400	0.0593201
	Os01g0140700	Os06g0553001	0.0461197		Os03g0657400	Os07g0687900	0.054745		Os02g0654700	Os04g0683700	0.0593055
	Os04g0541700	Os06g0553001	0.0432102		Os02g0132500	Os07g0687900	0.0522011		Os03g0764900	Os02g0261400	0.0592592
	Os01g0935000	Os02g0186800	0.0489054		Os04g0590400	Os02g0608000	0.0547343		Os04g0590400	Os02g0261400	0.0563127
	Os04g0541700	Os02g0186800	0.0421015		Os09g0481700	Os04g0585900	0.0546338		Os08g0442400	Os04g0366000	0.0592367
	Os05g0426200	Os11g0146950	0.0488958		Os01g0975300	Os04g0585900	0.0539005		Os07g0683200	Os07g0111700	0.0591678
	Os08g0159500	Os05g0500500	0.0488601		Os09g0417600	Os06g0671600	0.054632		Os07g0158500	Os07g0111700	0.0553398
	Os01g0192300	Os04g0630400	0.0488593		Os03g0657400	Os06g0671600	0.0546213		Os05g0569300	Os07g0111700	0.0552984
	Os04g0541700	Os04g0643800	0.0488532		Os12g0105600	Os06g0671600	0.0535443		Os08g0386200	Os03g0768900	0.0591211
	Os05g0572000	Os04g0643800	0.0483521		Os05g0183100	Os06g0671600	0.05228		Os08g0159500	Os02g0156600	0.0590976
	Os04g0590400	Os04g0643800	0.043574		Os05g0553400	Os06g0671600	0.0492013		Os05g0442700	Os01g0187200	0.0590894
	Os10g0376900	Os04g0643800	0.0430169		Os01g0816100	Os01g0690800	0.0545747		Os03g0198600	Os01g0187200	0.0518468
	Os05g0195700	Os12g0427600	0.0488316		Os05g0195700	Os09g0412700	0.0545186		Os02g0149900	Os06g0120200	0.0590879
	Os12g0515500	Os12g0427600	0.0426677		Os03g0764900	Os09g0412700	0.0472718		Os10g0376900	Os06g0120200	0.0533226
	Os03g0657400	Os07g0417200	0.0488287		Os04g0489600	Os12g0123200	0.0545055		Os04g0541700	Os02g0194600	0.0590669
	Os05g0579600	Os07g0417200	0.0432926		Os02g0603600	Os12g0123200	0.051241		Os01g0140700	Os02g0194600	0.0525637
	Os04g0590400	Os09g0497000	0.0488033		Os09g0287000	Os01g0891700	0.0544543		Os02g0806300	Os10g0471000	0.0590309
	Os03g0113500	Os01g0833500	0.0487799		Os02g0181300	Os01g0891700	0.0527274		Os07g0683200	Os10g0208500	0.0589913
	Os12g0592300	Os01g0833500	0.0446681		Os09g0334500	Os01g0891700	0.048689		Os05g0442700	Os10g0208500	0.0570977
	Os05g0488600	Os06g0304600	0.0487661		Os10g0536100	Os01g0192900	0.0544325		Os05g0569300	Os10g0208500	0.0511469
	Os04g0493000	Os11g0621400	0.0487371		Os09g0434500	Os01g0192900	0.0531549		Os05g0361700	Os01g0201200	0.0589831
	Os08g0537900	Os02g0714100	0.0487296		Os02g0132500	Os01g0192900	0.0496129		Os09g0549450	Os01g0201200	0.0525401
	Os01g0185900	Os03g0225900	0.0487283		Os09g0410700	Os07g0178800	0.0544309		Os08g0436700	Os01g0201200	0.0515045
	Os03g0182800	Os03g0225900	0.044964		Os01g0218100	Os07g0178800	0.0535847		Os05g0525900	Os08g0484100	0.0589824
	Os08g0174500	Os04g0196300	0.0487146		Os09g0481700	Os01g0796400	0.0543728		Os04g0557800	Os08g0485800	0.0589787
	Os04g0550200	Os04g0196300	0.0423482		Os01g0826400	Os01g0796400	0.0489789		Os02g0823900	Os03g0182000	0.0589509
	Os03g0711100	Os03g0655400	0.0486929		Os05g0361700	Os02g0207100	0.054361		Os01g0695900	Os03g0182000	0.05691
	Os08g0537900	Os03g0655400	0.0472256		Os03g0764100	Os02g0207100	0.0470265		Os03g0657400	Os01g0179600	0.0588848
	Os07g0680400	Os04g0633300	0.0486911		Os09g0287000	Os02g0207100	0.0468649		Os01g0305900	Os03g0165266	0.0587469
	Os05g0500600	Os03g0576600	0.0486745		Os01g0975300	Os07g0251900	0.054351		Os01g0624700	Os02g0248200	0.0587243
	Os08g0159500	Os03g0576600	0.0463107		Os07g0680400	Os07g0251900	0.0537292		Os04g0590400	Os07g0686300	0.0587187
	Os03g0109000	Os03g0576600	0.0434434		Os05g0553400	Os07g0251900	0.0521047		Os09g0434500	Os07g0686300	0.058427
	Os08g0174500	Os03g0576600	0.0432812		Os10g0536100	Os07g0686300	0.0543262		Os09g0286600	Os04g0496700	0.0586845
	Os02g0285900	Os12g0144200	0.0486733		Os10g0376900	Os07g0686300	0.0540985		Os02g0139000	Os04g0496700	0.0565463
	Os10g0490400	Os04g0228400	0.0486585		Os09g0434500	Os07g0686300	0.0512389		Os01g0218100	Os04g0496700	0.0506474
	Os02g0178100	Os04g0228400	0.0414329		Os04g0541700	Os07g0686300	0.0508248		Os01g0975300	Os07g0522500	0.0586823
	Os10g0536100	Os04g0538400	0.0486491		Os09g0481700	Os08g0201600	0.0543178		Os05g0553400	Os07g0522500	0.0540371
	Os04g0541700	Os04g0538400	0.0472244		Os01g0975300	Os02g0575900	0.0543021		Os03g0764100	Os04g0556500	0.0586505
	Os10g0376900	Os04g0538400	0.0447317		Os05g0343400	Os02g0575900	0.0538549		Os05g0343400	Os04g0556500	0.0502982
	Os07g0680400	Os01g0337500	0.0486352		Os07g0680400	Os01g0940700	0.0542621		Os04g0541700	Os01g0627500	0.0586207
	Os03g0135700	Os01g0743200	0.0486237		Os09g0434500	Os12g0576700	0.0542569		Os03g0657400	Os01g0627500	0.0541846
	Os03g0657400	Os10g0491400	0.0486226		Os10g0536100	Os12g0576700	0.0468476		Os01g0218100	Os01g0627500	0.051202
	Os10g0562900	Os10g0491400	0.0465455		Os03g0437200	Os08g0482600	0.0542304		Os01g0935000	Os03g0423300	0.0585878
	Os02g0603600	Os10g0491400	0.045717		Os01g0826400	Os08g0482600	0.0539749		Os01g0935000	Os07g0664400	0.0585789
	Os03g0711100	Os08g0451200	0.0485977		Os12g0156100	Os08g0482600	0.0481351		Os01g0575200	Os01g0276900	0.0585507
	Os02g0178100	Os08g0451200	0.0428724		Os02g0181300	Os08g0482600	0.047626		Os09g0286600	Os01g0276900	0.0563527
	Os05g0195700	Os05g0534100	0.048589		Os02g0654700	Os08g0482600	0.0469939		Os05g0569300	Os01g0547600	0.0584935
	Os08g0159500	Os05g0534100	0.0476524		Os05g0553400	Os08g0384500	0.0541799		Os05g0343400	Os01g0547600	0.0524759
	Os08g0537900	Os05g0534100	0.0459605		Os07g0680400	Os03g0277600	0.0541499		Os07g0158500	Os01g0547600	0.0506947
	Os04g0590400	Os04g0139100	0.0485172		Os09g0572000	Os03g0277600	0.0506368		Os08g0485700	Os04g0578300	0.0583707
	Os04g0541700	Os04g0139100	0.0455614		Os07g0680400	Os12g0527700	0.0541456		Os01g0975300	Os04g0578300	0.0536107
	Os08g0249000	Os04g0139100	0.0445515		Os01g0140700	Os12g0527700	0.0516112		Os01g0625300	Os07g0593400	0.058322
	Os09g0287000	Os07g0105000	0.0485106		Os08g0416000	Os11g0489250	0.0541359		Os09g0334500	Os02g0717600	0.0583151
	Os08g0442400	Os07g0105000	0.0483559		Os05g0195700	Os11g0489250	0.0515246		Os01g0218100	Os05g0421900	0.0582827
	Os04g0541700	Os07g0105000	0.044822		Os05g0488600	Os11g0489250	0.0478152		Os04g0541700	Os05g0421900	0.0568968
	Os01g0192300	Os07g0105000	0.0425656		Os03g0815100	Os02g0251800	0.0540847		Os09g0287000	Os05g0421900	0.054357
	Os04g0493000	Os05g0432200	0.0485041		Os08g0386200	Os02g0251800	0.0461425		Os04g0489600	Os06g0223700	0.0582803
	Os08g0537900	Os05g0432200	0.0460116		Os04g0541700	Os11g0644800	0.0539928		Os09g0572000	Os06g0223700	0.0501983
	Os03g0135700	Os01g0159000	0.0485022		Os11g0175700	Os11g0644800	0.0499932		Os08g0442400	Os01g0326300	0.0581944
	Os06g0663500	Os02g0217900	0.0484945		Os09g0379600	Os11g0644800	0.0495618		Os04g0541700	Os01g0326300	0.0539327
	Os09g0455300	Os02g0217900	0.0481052		Os09g0286600	Os04g0496150	0.0539444		Os09g0286600	Os01g0326300	0.0505373
	Os09g0287000	Os04g0684100	0.0484293		Os09g0334500	Os07g0162600	0.0539332		Os12g0515500	Os01g0326300	0.0496253
	Os04g0489600	Os04g0684100	0.0466411		Os05g0183100	Os07g0162600	0.0538726		Os01g0218100	Os08g0523200	0.0581388
	Os09g0286600	Os04g0684100	0.0448945		Os04g0546800	Os07g0162600	0.0490094		Os08g0485700	Os01g0651400	0.0581005
	Os04g0541700	Os04g0684100	0.0431329		Os01g0826400	Os03g0676400	0.0538916		Os05g0426200	Os01g0651400	0.0548425
	Os01g0935000	Os04g0684100	0.0425643		Os04g0489600	Os07g0538700	0.0538651		Os09g0481700	Os01g0651400	0.0520399
	Os09g0481700	Os11g0605100	0.0484217		Os01g0196300	Os09g0255400	0.0537436		Os01g0975300	Os01g0651400	0.0514767
	Os01g0292900	Os11g0605100	0.0459077		Os05g0553400	Os09g0255400	0.0527003		Os07g0680400	Os09g0471500	0.0580026
	Os05g0488600	Os12g0139400	0.0483902		Os05g0183100	Os09g0255400	0.0471336		Os03g0657400	Os09g0471500	0.0537889
	Os12g0515500	Os12g0139400	0.0472851		Os07g0683200	Os09g0255400	0.0459801		Os08g0386200	Os03g0342900	0.0579956
	Os03g0764900	Os12g0139400	0.0443335		Os09g0572000	Os02g0712600	0.0536707		Os02g0187700	Os12g0637000	0.0579776
	Os01g0298400	Os12g0139400	0.0419182		Os05g0322900	Os02g0712600	0.0487087		Os05g0525900	Os12g0637000	0.0567409
	Os04g0489600	Os06g0698785	0.0483397		Os06g0649000	Os01g0389200	0.053575		Os03g0164300	Os05g0582350	0.0579299
	Os04g0550200	Os10g0554300	0.0483315		Os01g0826400	Os03g0285800	0.0535459		Os05g0579600	Os05g0582350	0.054598
	Os03g0657400	Os01g0207400	0.0483156		Os04g0517100	Os03g0285800	0.0491502		Os08g0442400	Os01g0326100	0.0578701
	Os06g0663500	Os01g0207400	0.0474044		Os02g0654700	Os03g0285800	0.0490275		Os02g0603600	Os01g0326100	0.0558835
	Os08g0504000	Os01g0207400	0.0420517		Os01g0826400	Os06g0128800	0.0535252		Os04g0590400	Os09g0482860	0.0578528
	Os02g0174300	Os09g0544000	0.0483113		Os10g0562900	Os06g0128800	0.0530428		Os09g0481700	Os09g0482860	0.0554028
	Os07g0158500	Os09g0544000	0.0456075		Os01g0511000	Os06g0128800	0.0507021		Os04g0541700	Os02g0534400	0.0578243
	Os12g0586300	Os09g0544000	0.0451317		Os09g0410700	Os06g0128800	0.0471431		Os01g0140700	Os02g0534400	0.054157
	Os06g0284500	Os09g0544000	0.0434226		Os01g0575200	Os06g0128800	0.0459406		Os03g0657400	Os02g0534400	0.0516378
	Os05g0500600	Os09g0544000	0.0412223		Os02g0603600	Os07g0124100	0.053498		Os04g0590400	Os02g0534400	0.0500738
	Os08g0159500	Os09g0491820	0.0483093		Os03g0657400	Os07g0124100	0.0462946		Os08g0485700	Os02g0534400	0.0498851
	Os10g0376900	Os09g0491820	0.0461893		Os03g0198600	Os12g0240900	0.0534852		Os03g0657400	Os07g0417200	0.0578236
	Os09g0410700	Os01g0578500	0.0482249		Os05g0488600	Os12g0240900	0.0493494		Os05g0579600	Os07g0417200	0.0535413
	Os01g0246700	Os08g0247600	0.048223		Os05g0553400	Os02g0282000	0.0534539		Os06g0703900	Os10g0144700	0.0578212
	Os03g0659700	Os06g0253100	0.0482088		Os07g0680400	Os02g0282000	0.0512544		Os03g0183200	Os10g0144700	0.0577028
	Os09g0410700	Os06g0253100	0.0471171		Os07g0680400	Os07g0539900	0.0534095		Os08g0442400	Os07g0162100	0.0578113
	Os08g0504000	Os05g0154800	0.0481756		Os10g0562900	Os09g0447300	0.0534003		Os09g0434500	Os01g0826000	0.0577976
	Os11g0705200	Os05g0154800	0.0443574		Os02g0132500	Os05g0473000	0.0533809		Os01g0140700	Os01g0826000	0.0565179
	Os03g0821200	Os05g0154800	0.0439732		Os09g0434500	Os05g0473000	0.0498901		Os01g0575200	Os01g0826000	0.0542966
	Os03g0720800	Os05g0154800	0.0425635		Os02g0603600	Os05g0473000	0.0484005		Os04g0590400	Os01g0826000	0.051651
	Os01g0192300	Os02g0484200	0.0481568		Os10g0376900	Os05g0473000	0.0470308		Os04g0489600	Os01g0826000	0.0496539
	Os06g0519400	Os02g0484200	0.0437257		Os10g0536100	Os01g0972200	0.0533444		Os05g0442700	Os09g0482900	0.0577652
	Os01g0292900	Os10g0445600	0.0481492		Os01g0140700	Os01g0972200	0.0462821		Os08g0562300	Os09g0482900	0.0564158
	Os06g0703900	Os09g0449650	0.0481086		Os03g0657400	Os03g0649000	0.0533236		Os09g0481700	Os09g0482900	0.0563782
	Os07g0688200	Os09g0449650	0.0459319		Os02g0132500	Os03g0649000	0.0486415		Os04g0557800	Os09g0482900	0.055415
	Os09g0481700	Os09g0449650	0.0440726		Os05g0572000	Os09g0380501	0.0532623		Os05g0569300	Os09g0482900	0.0503895
	Os04g0590400	Os09g0482860	0.0480994		Os04g0541700	Os03g0625300	0.0531898		Os05g0195700	Os03g0655400	0.0577578
	Os04g0590400	Os01g0192900	0.0480968		Os02g0706600	Os09g0425200	0.0531745		Os06g0728700	Os03g0655400	0.0556966
	Os10g0376900	Os01g0192900	0.0442448		Os01g0192300	Os09g0425200	0.0462491		Os09g0287000	Os02g0207100	0.0577251
	Os04g0541700	Os01g0192900	0.0413921		Os09g0410700	Os09g0425200	0.0459765		Os03g0764100	Os02g0207100	0.0541157
	Os04g0489600	Os12g0486800	0.0480022		Os09g0572000	Os10g0180800	0.0531436		Os05g0361700	Os02g0207100	0.0511933
	Os04g0557800	Os11g0173100	0.0479997		Os01g0975300	Os02g0600400	0.0531074		Os09g0286600	Os03g0572250	0.0577101
	Os01g0192300	Os11g0173100	0.0478414		Os10g0562900	Os02g0600400	0.0530621		Os03g0657400	Os03g0572250	0.0528917
	Os10g0536100	Os11g0173100	0.0444235		Os01g0141000	Os02g0600400	0.0512732		Os08g0442400	Os03g0572250	0.0497077
	Os05g0195700	Os05g0140334	0.0479404		Os02g0603600	Os02g0600400	0.0474901		Os06g0562300	Os03g0572250	0.0493213
	Os12g0586300	Os05g0140334	0.0428734		Os04g0590400	Os07g0529600	0.0530122		Os05g0426200	Os01g0972200	0.0577085
	Os07g0680400	Os11g0474800	0.0479235		Os01g0575200	Os07g0529600	0.0462676		Os04g0557800	Os01g0972200	0.0539714
	Os01g0292900	Os11g0474800	0.0466565		Os09g0434500	Os07g0529600	0.045186		Os09g0309700	Os06g0129900	0.0576654
	Os05g0553400	Os11g0474800	0.0450603		Os02g0132500	Os01g0648600	0.053009		Os04g0557800	Os06g0713800	0.0576265
	Os03g0657400	Os11g0474800	0.044771		Os09g0287000	Os01g0648600	0.0491285		Os03g0657400	Os12g0555000	0.0576145
	Os02g0221100	Os11g0474800	0.0443133		Os09g0434500	Os01g0648600	0.0468359		Os01g0196300	Os12g0555000	0.0542411
	Os01g0975300	Os11g0474800	0.0440929		Os10g0536100	Os01g0648600	0.0453718		Os01g0816100	Os07g0526600	0.0576141
	Os10g0560700	Os02g0261400	0.0479079		Os04g0517100	Os01g0905200	0.0529814		Os02g0603600	Os07g0503900	0.0576106
	Os03g0720800	Os02g0261400	0.0420541		Os01g0826400	Os01g0905200	0.0525145		Os05g0426200	Os07g0503900	0.0570979
	Os04g0493000	Os09g0503100	0.0478243		Os01g0575200	Os01g0905200	0.0510879		Os01g0141000	Os07g0503900	0.0497925
	Os08g0159500	Os09g0503100	0.0455055		Os03g0437200	Os01g0905200	0.0500848		Os07g0158500	Os11g0700900	0.0576102
	Os08g0537900	Os09g0503100	0.0454127		Os03g0815100	Os01g0905200	0.0453095		Os07g0680400	Os01g0337500	0.0575967
	Os01g0292900	Os01g0332200	0.0478085		Os05g0183100	Os02g0228300	0.0529691		Os07g0683200	Os03g0340500	0.057557
	Os04g0541700	Os09g0344700	0.0477996		Os05g0322900	Os02g0228300	0.0465185		Os01g0867300	Os03g0340500	0.0564071
	Os08g0537900	Os08g0359000	0.0477978		Os08g0442400	Os01g0326300	0.0529364		Os06g0703900	Os06g0531751	0.057556
	Os04g0590400	Os05g0380300	0.0477947		Os07g0617000	Os08g0203150	0.0527823		Os04g0557800	Os08g0526633	0.0574038
	Os01g0975300	Os10g0148400	0.0477878		Os02g0603600	Os09g0339000	0.0526899		Os04g0590400	Os08g0526633	0.0569212
	Os04g0590400	Os01g0275300	0.0477641		Os10g0376900	Os09g0339000	0.048495		Os08g0485700	Os07g0413800	0.0573555
	Os08g0159500	Os11g0127800	0.0477611		Os07g0617000	Os09g0339000	0.0471402		Os10g0562900	Os09g0541100	0.0573154
	Os08g0537900	Os11g0127800	0.0454088		Os10g0536100	Os09g0339000	0.0469991		Os03g0657400	Os09g0541100	0.0534932
	Os03g0198600	Os08g0518900	0.0477515		Os09g0434500	Os05g0421900	0.0526357		Os05g0195700	Os12g0628100	0.0572354
	Os01g0298400	Os08g0518900	0.0456387		Os02g0139000	Os05g0421900	0.0521598		Os03g0764900	Os12g0628100	0.0554961
	Os03g0135700	Os02g0673000	0.0476824		Os09g0286600	Os05g0421900	0.0515953		Os08g0159500	Os12g0628100	0.0490508
	Os10g0536100	Os02g0673000	0.0440638		Os09g0287000	Os05g0421900	0.0481211		Os01g0246700	Os03g0346200	0.0572239
	Os01g0185900	Os10g0578200	0.047677		Os01g0816100	Os12g0547600	0.0525915		Os03g0815100	Os03g0346200	0.0531092
	Os09g0410700	Os10g0578200	0.0438174		Os02g0654700	Os12g0547600	0.0449575		Os04g0569100	Os07g0513200	0.0572126
	Os09g0287000	Os06g0683100	0.0476686		Os05g0195700	Os01g0975900	0.0525701		Os04g0541700	Os07g0513200	0.0503444
	Os03g0198600	Os06g0683100	0.0444184		Os07g0225300	Os01g0975900	0.044897		Os08g0159500	Os02g0570500	0.0572062
	Os03g0445700	Os10g0556500	0.0476534		Os08g0442400	Os01g0962700	0.0525647		Os02g0603600	Os05g0495600	0.0571894
	Os01g0575200	Os10g0556500	0.0435711		Os04g0546800	Os03g0850400	0.0525504		Os01g0935000	Os05g0495600	0.0508977
	Os03g0231950	Os10g0556500	0.0426194		Os03g0183000	Os03g0850400	0.0512161		Os04g0489600	Os05g0495600	0.0508183
	Os03g0188400	Os10g0556500	0.0422685		Os03g0183200	Os03g0850400	0.0460124		Os01g0575200	Os04g0244800	0.0571704
	Os10g0562900	Os02g0827900	0.0476518		Os05g0343400	Os03g0850400	0.0454534		Os04g0541700	Os04g0244800	0.0567664
	Os01g0141000	Os02g0827900	0.0461818		Os07g0683200	Os03g0850400	0.044945		Os01g0935000	Os04g0244800	0.0542373
	Os05g0565900	Os07g0471200	0.0476458		Os02g0603600	Os03g0739700	0.0525126		Os01g0935000	Os11g0428500	0.057167
	Os01g0975300	Os06g0313440	0.0476435		Os01g0141000	Os03g0739700	0.0524883		Os09g0434500	Os11g0428500	0.0522297
	Os09g0286600	Os10g0409400	0.0476394		Os03g0657400	Os03g0739700	0.0470529		Os03g0657400	Os11g0428500	0.0497536
	Os02g0603600	Os10g0409400	0.0434435		Os02g0181300	Os06g0530600	0.0524089		Os07g0680400	Os04g0179200	0.0571406
	Os02g0221100	Os02g0779300	0.0476063		Os04g0590400	Os08g0202200	0.0523429		Os05g0537100	Os03g0804500	0.0570654
	Os12g0586300	Os02g0779300	0.0410883		Os02g0603600	Os08g0202200	0.0503193		Os09g0334500	Os03g0804500	0.0531738
	Os08g0442400	Os01g0962700	0.0475899		Os10g0376900	Os08g0202200	0.0502903		Os06g0726300	Os03g0804500	0.0529602
	Os01g0192300	Os01g0962700	0.0458413		Os09g0434500	Os08g0202200	0.0489359		Os02g0181300	Os03g0804500	0.052912
	Os05g0343400	Os04g0556500	0.0475501		Os07g0680400	Os08g0509100	0.0522263		Os05g0183100	Os03g0804500	0.0498002
	Os03g0764100	Os04g0556500	0.0469733		Os05g0553400	Os08g0509100	0.0508559		Os07g0680400	Os07g0654500	0.057011
	Os05g0474800	Os04g0556500	0.0426727		Os02g0603600	Os03g0223400	0.0521724		Os05g0444200	Os06g0115300	0.0570003
	Os03g0815100	Os04g0556500	0.0412246		Os01g0625300	Os03g0223400	0.0469221		Os06g0703900	Os06g0115300	0.0495899
	Os04g0515900	Os02g0251900	0.0475439		Os10g0376900	Os05g0380200	0.0521588		Os01g0584900	Os06g0323100	0.0568145
	Os08g0159500	Os02g0251900	0.0406603		Os04g0590400	Os05g0380200	0.0469576		Os04g0489600	Os09g0346600	0.0568036
	Os04g0489600	Os02g0503100	0.0475398		Os10g0536100	Os05g0380200	0.0461969		Os02g0603600	Os09g0346600	0.0531638
	Os08g0386200	Os02g0584800	0.047511		Os08g0416000	Os05g0580000	0.0521503		Os04g0557800	Os09g0346600	0.0516958
	Os03g0815100	Os02g0584800	0.0423216		Os04g0540200	Os05g0580000	0.0503595		Os02g0132500	Os09g0346600	0.0499102
	Os04g0517100	Os02g0584800	0.0406408		Os06g0649000	Os01g0699100	0.0520969		Os05g0569300	Os06g0354700	0.0567793
	Os10g0490400	Os03g0798400	0.0475051		Os02g0181300	Os01g0699100	0.0507216		Os07g0683200	Os10g0416800	0.0567778
	Os09g0431900	Os03g0798400	0.0418015		Os07g0683200	Os01g0699100	0.0466624		Os11g0684000	Os10g0416800	0.0506623
	Os01g0935000	Os02g0600400	0.0474927		Os03g0860100	Os01g0925100	0.05209		Os05g0488600	Os07g0691200	0.0567628
	Os08g0386200	Os02g0584700	0.0474887		Os09g0334500	Os03g0743500	0.0520512		Os01g0935000	Os07g0543300	0.0567138
	Os02g0181300	Os02g0584700	0.0415806		Os08g0386200	Os03g0743500	0.0507658		Os09g0309700	Os07g0543300	0.0495074
	Os10g0536100	Os06g0548500	0.047475		Os05g0183100	Os03g0743500	0.0495752		Os02g0806300	Os08g0480000	0.0567052
	Os10g0536100	Os11g0302800	0.0474457		Os04g0610400	Os03g0743500	0.0489738		Os01g0575200	Os08g0480000	0.0566367
	Os06g0663500	Os11g0302800	0.0455772		Os12g0105600	Os03g0743500	0.0477833		Os08g0386200	Os03g0743500	0.0566882
	Os04g0590400	Os11g0302800	0.0425778		Os11g0705200	Os04g0244800	0.0520143		Os02g0181300	Os03g0743500	0.0520999
	Os01g0140700	Os11g0302800	0.0425616		Os09g0434500	Os04g0244800	0.0517351		Os05g0537100	Os03g0743500	0.0487962
	Os03g0711100	Os03g0170500	0.047398		Os03g0657400	Os04g0244800	0.0501879		Os05g0569300	Os04g0655400	0.0566791
	Os10g0551200	Os03g0170500	0.0408492		Os04g0590400	Os04g0244800	0.0491297		Os07g0683200	Os04g0655400	0.0556859
	Os06g0519400	Os07g0633200	0.0473921		Os01g0140700	Os04g0244800	0.0460792		Os01g0867300	Os04g0655400	0.0502581
	Os12g0586300	Os11g0625801	0.0473882		Os01g0218100	Os04g0244800	0.0456096		Os06g0728700	Os04g0165700	0.056664
	Os05g0565900	Os11g0625801	0.0473527		Os03g0666300	Os04g0244800	0.045595		Os05g0569300	Os03g0816500	0.0566591
	Os04g0557800	Os11g0625801	0.043546		Os03g0183200	Os09g0478300	0.0518261		Os05g0442700	Os03g0816500	0.0503591
	Os05g0426200	Os11g0625801	0.0424246		Os05g0488600	Os09g0478300	0.0478706		Os05g0322900	Os02g0699000	0.0566559
	Os06g0519400	Os04g0311100	0.047388		Os07g0680400	Os05g0278500	0.051824		Os01g0625300	Os02g0699000	0.0505813
	Os10g0536100	Os04g0311100	0.0454998		Os05g0553400	Os05g0278500	0.0514568		Os05g0183100	Os07g0162600	0.0566536
	Os01g0140700	Os04g0311100	0.0413276		Os02g0603600	Os01g0178900	0.0517828		Os07g0683200	Os08g0530801	0.0566413
	Os01g0292900	Os04g0311100	0.0409462		Os03g0657400	Os01g0178900	0.0450538		Os08g0436700	Os08g0530801	0.055024
	Os08g0159500	Os09g0565200	0.0473874		Os02g0603600	Os08g0203600	0.0517589		Os05g0444200	Os08g0530801	0.0504459
	Os09g0286600	Os01g0840900	0.0473869		Os04g0489600	Os08g0203600	0.0517236		Os09g0334500	Os08g0530801	0.0504451
	Os04g0541700	Os01g0840900	0.0457903		Os09g0434500	Os08g0203600	0.0498082		Os05g0569300	Os08g0530801	0.0496763
	Os10g0376900	Os01g0840900	0.0409987		Os04g0590400	Os08g0203600	0.0450213		Os08g0386200	Os12g0158700	0.0566206
	Os11g0175700	Os10g0551800	0.0473638		Os10g0536100	Os08g0203600	0.0449242		Os01g0575200	Os01g0191200	0.0565906
	Os01g0192300	Os10g0551800	0.0463088		Os06g0662200	Os05g0394900	0.0517386		Os04g0489600	Os01g0191200	0.0488584
	Os08g0537900	Os10g0551800	0.0459785		Os09g0286600	Os05g0394900	0.0462764		Os02g0654700	Os01g0858900	0.0565832
	Os09g0431900	Os10g0551800	0.0457909		Os04g0489600	Os09g0343400	0.0516832		Os06g0728700	Os11g0214900	0.0565815
	Os02g0603600	Os03g0739700	0.0473207		Os11g0603000	Os09g0343400	0.0480263		Os05g0195700	Os11g0214900	0.0498237
	Os04g0557800	Os03g0739700	0.0428617		Os07g0617000	Os09g0343400	0.0440136		Os01g0575200	Os09g0460400	0.0565617
	Os05g0426200	Os03g0739700	0.0420998		Os09g0417600	Os09g0547500	0.0516602		Os03g0657400	Os09g0460400	0.0538129
	Os12g0515500	Os04g0115700	0.0473057		Os01g0625300	Os10g0132300	0.0516021		Os01g0140700	Os09g0460400	0.0531993
	Os01g0246700	Os05g0186100	0.0473015		Os09g0417600	Os10g0132300	0.047974		Os09g0309700	Os01g0216000	0.056517
	Os04g0557800	Os04g0525100	0.0472933		Os08g0386200	Os10g0132300	0.0464477		Os10g0376900	Os01g0216000	0.054847
	Os12g0586300	Os06g0220100	0.0472708		Os05g0183100	Os10g0132300	0.0461485		Os04g0590400	Os01g0216000	0.0516915
	Os04g0557800	Os06g0220100	0.0425681		Os02g0603600	Os10g0165300	0.051488		Os04g0541700	Os01g0216000	0.0480651
	Os04g0541700	Os11g0614500	0.0471941		Os04g0515900	Os10g0165300	0.0455779		Os02g0823900	Os03g0283000	0.0564992
	Os03g0764900	Os11g0614500	0.0455436		Os01g0185900	Os10g0165300	0.0442153		Os03g0183200	Os03g0283000	0.0531005
	Os01g0192300	Os11g0614500	0.0451047		Os04g0541700	Os11g0209000	0.0514821		Os01g0695900	Os03g0283000	0.0498234
	Os03g0820300	Os08g0245200	0.0471524		Os04g0541700	Os03g0269900	0.0514434		Os04g0489600	Os02g0503100	0.056459
	Os03g0720800	Os08g0245200	0.0451388		Os08g0546800	Os03g0269900	0.0487962		Os01g0298400	Os09g0342000	0.0564089
	Os06g0663500	Os08g0245200	0.0424199		Os09g0509700	Os03g0269900	0.0457725		Os09g0287000	Os08g0334300	0.0563672
	Os02g0695200	Os08g0245200	0.0416709		Os01g0192300	Os03g0269900	0.0444782		Os08g0442400	Os08g0334300	0.0493973
	Os09g0455300	Os08g0245200	0.0408902		Os07g0680400	Os01g0613800	0.0513798		Os09g0434500	Os03g0727600	0.056361
	Os08g0249000	Os10g0130800	0.0471445		Os05g0183100	Os01g0613800	0.0457245		Os04g0489600	Os03g0727600	0.0501684
	Os01g0935000	Os04g0565400	0.0471388		Os04g0569100	Os09g0344400	0.0512484		Os09g0334500	Os11g0226966	0.0562985
	Os02g0132500	Os04g0565400	0.0420708		Os04g0541700	Os09g0344400	0.0484363		Os08g0485700	Os05g0574400	0.0562837
	Os04g0590400	Os05g0155100	0.0471288		Os10g0536100	Os09g0344400	0.0450152		Os10g0376900	Os01g0818600	0.0562587
	Os03g0720800	Os05g0155100	0.0430782		Os02g0654700	Os01g0175100	0.0512256		Os08g0159500	Os01g0818600	0.0551757
	Os11g0705200	Os05g0155100	0.0429045		Os09g0334500	Os01g0175100	0.0505368		Os08g0159500	Os11g0209000	0.0561656
	Os06g0284500	Os08g0200300	0.0470986		Os02g0181300	Os01g0175100	0.045387		Os01g0935000	Os11g0209000	0.0480253
	Os02g0178100	Os08g0200300	0.0445081		Os07g0617000	Os03g0856500	0.0512011		Os06g0166400	Os05g0423701	0.0561169
	Os05g0500600	Os08g0200300	0.0416418		Os02g0132500	Os03g0856500	0.0441222		Os01g0246700	Os05g0423701	0.0489126
	Os05g0426200	Os01g0892500	0.0470867		Os10g0536100	Os03g0856500	0.0437292		Os05g0426200	Os02g0608000	0.0560648
	Os12g0586300	Os01g0892500	0.0405143		Os01g0192300	Os02g0651900	0.05115		Os08g0485700	Os02g0608000	0.0512543
	Os11g0175700	Os01g0226600	0.0470764		Os01g0575200	Os02g0651900	0.0475678		Os05g0426200	Os03g0691800	0.0560237
	Os06g0226500	Os01g0226600	0.0455768		Os11g0175700	Os02g0651900	0.0464207		Os04g0557800	Os03g0691800	0.0522836
	Os03g0711100	Os11g0620100	0.0470723		Os04g0541700	Os02g0651900	0.0440387		Os09g0481700	Os09g0442600	0.0560151
	Os03g0231950	Os11g0620100	0.0408066		Os01g0140700	Os02g0651900	0.0438768		Os02g0181300	Os04g0450400	0.0559948
	Os05g0537100	Os10g0395000	0.0470656		Os02g0706600	Os07g0142900	0.0510985		Os05g0537100	Os04g0450400	0.048904
	Os03g0182800	Os10g0395000	0.0464594		Os01g0141000	Os07g0142900	0.0444734		Os02g0654700	Os04g0450400	0.0486412
	Os06g0649000	Os10g0395000	0.0443204		Os08g0442400	Os11g0278300	0.0510673		Os09g0334500	Os04g0450400	0.0479519
	Os01g0975300	Os08g0331900	0.0470453		Os10g0536100	Os11g0278300	0.04849		Os03g0657400	Os03g0126700	0.0559512
	Os05g0553400	Os08g0331900	0.0463125		Os09g0434500	Os11g0278300	0.0471727		Os01g0575200	Os03g0126700	0.0543097
	Os07g0680400	Os08g0331900	0.0452125		Os01g0192300	Os11g0278300	0.0437596		Os01g0218100	Os03g0126700	0.0542386
	Os03g0657400	Os08g0331900	0.0423296		Os10g0562900	Os02g0242900	0.051026		Os01g0196300	Os11g0180800	0.0559471
	Os03g0182800	Os02g0472700	0.0470321		Os03g0183000	Os02g0242900	0.0504497		Os04g0557800	Os01g0737500	0.0559374
	Os03g0327800	Os02g0472700	0.0460167		Os09g0572000	Os02g0242900	0.0460429		Os05g0426200	Os01g0737500	0.054043
	Os11g0684000	Os02g0472700	0.0406583		Os06g0649000	Os02g0242900	0.0453374		Os01g0196300	Os08g0331000	0.0559292
	Os08g0537900	Os10g0105900	0.0469816		Os01g0511000	Os06g0683100	0.0509332		Os05g0183100	Os08g0331000	0.0511807
	Os01g0975300	Os10g0105900	0.0443231		Os03g0657400	Os06g0683100	0.0477559		Os01g0584900	Os08g0331000	0.0504185
	Os02g0233200	Os10g0105900	0.0431402		Os02g0706600	Os06g0683100	0.0436742		Os04g0590400	Os05g0531000	0.055915
	Os08g0159500	Os10g0105900	0.0417776		Os03g0764900	Os02g0669100	0.0509179		Os03g0657400	Os05g0531000	0.0513763
	Os04g0493000	Os09g0272200	0.0469782		Os06g0662200	Os12g0242500	0.0508972		Os01g0575200	Os05g0531000	0.0511395
	Os03g0711100	Os09g0272200	0.041798		Os09g0286600	Os12g0242500	0.0471391		Os08g0485700	Os05g0531000	0.0477461
	Os02g0638650	Os12g0109200	0.0469541		Os01g0575200	Os12g0242500	0.0458998		Os08g0485700	Os11g0547800	0.0559076
	Os03g0109000	Os12g0109200	0.0419631		Os11g0705200	Os01g0837000	0.0508758		Os01g0584900	Os04g0509600	0.0558784
	Os03g0711100	Os01g0756300	0.0469416		Os01g0298400	Os01g0837000	0.044914		Os09g0434500	Os08g0203600	0.0558059
	Os02g0285900	Os01g0756300	0.046167		Os06g0649000	Os02g0669366	0.0508398		Os04g0489600	Os08g0203600	0.0540495
	Os01g0975300	Os01g0585200	0.0468982		Os12g0156100	Os02g0669366	0.0480454		Os05g0426200	Os11g0676500	0.0558028
	Os07g0680400	Os01g0585200	0.0399233		Os03g0183200	Os07g0575500	0.0508342		Os02g0603600	Os03g0856500	0.0557299
	Os03g0231950	Os12g0405300	0.0468796		Os07g0683200	Os07g0575500	0.0490281		Os05g0426200	Os09g0471200	0.0556944
	Os03g0198600	Os05g0181700	0.0468769		Os09g0334500	Os07g0575500	0.0448579		Os10g0562900	Os09g0471200	0.0520337
	Os01g0575200	Os01g0276900	0.0468657		Os03g0183000	Os07g0575500	0.0432904		Os03g0183000	Os09g0471200	0.0476296
	Os08g0249000	Os01g0276900	0.041702		Os03g0657400	Os11g0482200	0.0508277		Os01g0218100	Os07g0178800	0.0556721
	Os02g0732600	Os12g0434801	0.0468476		Os01g0185900	Os11g0625801	0.0507666		Os06g0562300	Os07g0178800	0.0510061
	Os02g0624300	Os05g0577500	0.0468198		Os10g0536100	Os11g0625801	0.0483272		Os01g0935000	Os07g0178800	0.0478622
	Os06g0728700	Os08g0221300	0.0468125		Os03g0183200	Os10g0552700	0.0505819		Os07g0680400	Os03g0363100	0.0556497
	Os05g0195700	Os08g0221300	0.0433377		Os04g0515900	Os11g0541600	0.0505557		Os09g0434500	Os11g0173100	0.055591
	Os05g0579600	Os08g0221300	0.0419837		Os07g0680400	Os11g0541600	0.0490561		Os04g0557800	Os11g0173100	0.0522665
	Os02g0132500	Os07g0614100	0.0468051		Os09g0572000	Os11g0541600	0.0439555		Os04g0590400	Os11g0173100	0.0518061
	Os04g0541700	Os09g0455400	0.0467927		Os09g0410700	Os02g0504000	0.0505206		Os04g0541700	Os11g0173100	0.0478236
	Os01g0975300	Os04g0578300	0.0467875		Os01g0575200	Os02g0504000	0.0457604		Os05g0322900	Os03g0122300	0.0555735
	Os01g0185900	Os04g0365100	0.0467826		Os06g0662200	Os02g0504000	0.0454023		Os08g0386200	Os02g0582600	0.0555708
	Os07g0680400	Os12g0636400	0.0467211		Os09g0572000	Os11g0228201	0.0505188		Os04g0517100	Os02g0582600	0.0514633
	Os11g0490900	Os12g0636400	0.0447349		Os07g0617000	Os11g0228201	0.0445158		Os05g0183100	Os02g0582600	0.0481098
	Os01g0292900	Os12g0636400	0.0413248		Os02g0603600	Os10g0524700	0.050493		Os05g0322900	Os03g0225900	0.0555335
	Os01g0141000	Os05g0537400	0.0467178		Os04g0489600	Os10g0524700	0.0496127		Os07g0683200	Os03g0225900	0.051599
	Os05g0525900	Os05g0537400	0.0457065		Os09g0434500	Os10g0524700	0.0454451		Os03g0437200	Os03g0225900	0.0514383
	Os07g0680400	Os05g0537400	0.0399366		Os02g0132500	Os10g0524700	0.0450121		Os04g0517100	Os03g0225900	0.0495635
	Os06g0663500	Os10g0569100	0.0466885		Os04g0590400	Os10g0524700	0.0436034		Os03g0183200	Os12g0120100	0.0554468
	Os06g0519400	Os10g0569100	0.0408118		Os09g0334500	Os04g0450400	0.0504885		Os01g0624700	Os12g0120100	0.0526581
	Os02g0233200	Os03g0807100	0.0466732		Os02g0654700	Os04g0450400	0.0499567		Os09g0549450	Os11g0267000	0.0553947
	Os11g0175700	Os03g0807100	0.0464121		Os02g0181300	Os04g0450400	0.0454778		Os01g0624700	Os11g0267000	0.0521177
	Os04g0493000	Os03g0807100	0.0447976		Os04g0610400	Os04g0450400	0.043223		Os04g0541700	Os01g0645900	0.0553889
	Os10g0536100	Os09g0346600	0.0466602		Os04g0541700	Os11g0670900	0.0504826		Os01g0140700	Os01g0645900	0.050603
	Os04g0590400	Os09g0346600	0.0432581		Os06g0662200	Os11g0670900	0.0451662		Os04g0569100	Os01g0645900	0.0505636
	Os07g0617000	Os09g0346600	0.0416933		Os11g0175700	Os11g0670900	0.0451392		Os01g0575200	Os02g0651900	0.0553753
	Os10g0376900	Os09g0346600	0.0409813		Os09g0410700	Os11g0670900	0.0430132		Os03g0657400	Os02g0651900	0.0492248
	Os11g0707300	Os01g0661650	0.046633		Os09g0572000	Os12g0471100	0.0503977		Os04g0557800	Os01g0848900	0.055311
	Os03g0821200	Os01g0661650	0.0445575		Os03g0764100	Os12g0471100	0.0452451		Os07g0683200	Os01g0848900	0.0493164
	Os01g0575200	Os01g0661650	0.0438319		Os01g0298400	Os12g0471100	0.0452076		Os05g0569300	Os01g0848900	0.0491037
	Os08g0504000	Os01g0661650	0.0432201		Os02g0603600	Os03g0691800	0.0503947		Os09g0334500	Os01g0848900	0.048867
	Os10g0536100	Os01g0661650	0.0419824		Os01g0141000	Os03g0691800	0.0463993		Os01g0246700	Os04g0573900	0.0552857
	Os10g0376900	Os02g0437300	0.0466237		Os01g0185900	Os06g0640100	0.0501765		Os07g0683200	Os04g0573900	0.0547516
	Os02g0603600	Os02g0437300	0.043679		Os11g0705200	Os06g0640100	0.0485101		Os05g0444200	Os04g0573900	0.0502839
	Os10g0536100	Os02g0437300	0.0419643		Os10g0376900	Os06g0554600	0.0501609		Os08g0436700	Os04g0462500	0.0552538
	Os01g0975300	Os01g0660200	0.0465767		Os06g0649000	Os01g0940800	0.0501315		Os03g0198600	Os04g0462500	0.0515958
	Os07g0680400	Os01g0660200	0.0451861		Os09g0572000	Os01g0940800	0.0492347		Os09g0481700	Os01g0136100	0.0552509
	Os07g0683200	Os09g0513200	0.0465744		Os01g0140700	Os01g0940800	0.0450209		Os01g0575200	Os06g0253100	0.0551576
	Os11g0684000	Os09g0513200	0.0423112		Os04g0515900	Os01g0940800	0.0449231		Os08g0159500	Os06g0253100	0.0518839
	Os02g0603600	Os08g0202200	0.0465741		Os08g0386200	Os04g0464100	0.0500553		Os06g0703900	Os06g0160700	0.0551154
	Os04g0590400	Os08g0202200	0.04111		Os03g0437200	Os04g0464100	0.0487712		Os05g0444200	Os06g0160700	0.0525013
	Os03g0720800	Os03g0559700	0.0465397		Os05g0343400	Os04g0464100	0.0480664		Os01g0246700	Os06g0160700	0.0473315
	Os08g0537900	Os03g0559700	0.0443846		Os01g0826400	Os04g0464100	0.0434063		Os05g0343400	Os01g0392600	0.0551042
	Os03g0821200	Os03g0559700	0.0401023		Os10g0376900	Os11g0569500	0.0500312		Os07g0225300	Os01g0392600	0.0532641
	Os11g0707300	Os03g0559700	0.0398272		Os01g0575200	Os04g0616700	0.050018		Os10g0376900	Os05g0267900	0.0550777
	Os03g0657400	Os01g0206600	0.0465382		Os01g0826400	Os04g0684900	0.0499949		Os01g0935000	Os05g0267900	0.051112
	Os03g0135700	Os01g0206600	0.0462343		Os04g0515900	Os04g0684900	0.043599		Os07g0617000	Os05g0267900	0.047631
	Os06g0519400	Os01g0206600	0.04072		Os05g0183100	Os03g0411800	0.0499915		Os09g0434500	Os10g0409400	0.0550199
	Os01g0140700	Os01g0206600	0.0404954		Os01g0975300	Os03g0411800	0.046805		Os02g0603600	Os10g0409400	0.0471707
	Os03g0437200	Os06g0125800	0.0465256		Os06g0649000	Os09g0571200	0.0499474		Os02g0603600	Os05g0135400	0.0550191
	Os06g0284500	Os12g0417450	0.0465214		Os05g0322900	Os09g0571200	0.0452427		Os09g0572000	Os01g0810300	0.0549682
	Os02g0649300	Os12g0417450	0.0422688		Os09g0334500	Os03g0270000	0.0499306		Os04g0489600	Os01g0810300	0.0520276
	Os08g0159500	Os07g0630800	0.0464909		Os12g0156100	Os02g0633066	0.049881		Os08g0159500	Os01g0810300	0.0485145
	Os08g0249000	Os07g0630800	0.0396284		Os01g0826400	Os02g0633066	0.0463563		Os05g0183100	Os07g0471300	0.0548778
	Os03g0609500	Os01g0765400	0.0464471		Os03g0860100	Os02g0633066	0.0445176		Os05g0553400	Os07g0471300	0.052359
	Os10g0551200	Os03g0197100	0.0464438		Os04g0541700	Os04g0634800	0.0498608		Os05g0444200	Os05g0454500	0.0548679
	Os08g0159500	Os03g0197100	0.0435471		Os01g0192300	Os04g0634800	0.0462629		Os05g0579700	Os01g0734466	0.0548484
	Os03g0109000	Os03g0197100	0.0423242		Os01g0218100	Os04g0634800	0.044296		Os01g0584900	Os01g0734466	0.0517784
	Os07g0680400	Os01g0940700	0.0464316		Os04g0569100	Os04g0634800	0.0433307		Os06g0166400	Os02g0644000	0.0548054
	Os04g0557800	Os01g0365000	0.0464092		Os04g0590400	Os12g0594000	0.0497943		Os01g0246700	Os02g0644000	0.0483205
	Os09g0287000	Os01g0365000	0.0430655		Os08g0442400	Os12g0594000	0.0480973		Os12g0515500	Os12g0438300	0.0547785
	Os04g0550200	Os01g0365000	0.0418467		Os05g0343400	Os01g0741900	0.049785		Os09g0286600	Os12g0438300	0.0530813
	Os03g0657400	Os09g0403967	0.0464		Os01g0826400	Os01g0741900	0.0451435		Os08g0442400	Os12g0438300	0.050202
	Os01g0575200	Os09g0403967	0.0440439		Os01g0575200	Os05g0457200	0.0496867		Os04g0569100	Os12g0438300	0.0477583
	Os03g0135700	Os09g0403967	0.0434554		Os09g0410700	Os05g0457200	0.046352		Os09g0572000	Os12g0170800	0.0547574
	Os03g0821200	Os09g0403967	0.0434097		Os04g0517100	Os05g0324700	0.0495712		Os05g0488600	Os02g0557800	0.0546874
	Os01g0140700	Os09g0403967	0.0425999		Os03g0764100	Os05g0324700	0.0449294		Os11g0603000	Os08g0260800	0.0546728
	Os05g0572000	Os04g0607566	0.0463776		Os05g0343400	Os05g0324700	0.0428885		Os07g0683200	Os08g0391000	0.0546701
	Os02g0132500	Os04g0607566	0.0395824		Os06g0649000	Os05g0324700	0.0426517		Os01g0196300	Os08g0391000	0.0474523
	Os09g0286600	Os11g0484000	0.0463701		Os04g0515900	Os03g0314500	0.0495622		Os07g0680400	Os08g0391000	0.0468551
	Os03g0764900	Os11g0484000	0.0395011		Os01g0140700	Os03g0314500	0.0425437		Os07g0158500	Os02g0731500	0.0545824
	Os05g0322900	Os03g0122300	0.0463451		Os01g0185900	Os09g0472900	0.0494911		Os05g0444200	Os02g0731500	0.0538251
	Os04g0517100	Os03g0122300	0.042289		Os02g0638650	Os09g0472900	0.046428		Os07g0683200	Os02g0731500	0.0512707
	Os01g0975300	Os02g0642200	0.0463439		Os09g0410700	Os09g0472900	0.043249		Os04g0546800	Os02g0175950	0.0545798
	Os07g0683200	Os02g0642200	0.0457661		Os09g0434500	Os06g0618700	0.0494505		Os09g0334500	Os02g0175950	0.0498196
	Os01g0292900	Os05g0317700	0.0463276		Os10g0536100	Os06g0618700	0.0488197		Os02g0132500	Os06g0642500	0.0545722
	Os01g0975300	Os05g0317700	0.0442975		Os10g0376900	Os06g0618700	0.0434296		Os05g0426200	Os03g0739700	0.0545439
	Os02g0178100	Os02g0588600	0.0463263		Os02g0603600	Os06g0618700	0.0433127		Os01g0575200	Os12g0144200	0.0544236
	Os01g0928000	Os07g0660000	0.0462441		Os09g0572000	Os06g0288100	0.0494304		Os06g0728700	Os12g0144200	0.0465442
	Os01g0140700	Os02g0702100	0.046234		Os06g0649000	Os06g0288100	0.0483581		Os05g0426200	Os01g0564300	0.0543809
	Os10g0536100	Os02g0702100	0.042364		Os09g0410700	Os06g0288100	0.0461726		Os01g0935000	Os06g0699301	0.0543514
	Os02g0233200	Os01g0727100	0.046233		Os03g0657400	Os04g0532400	0.0493937		Os04g0489600	Os06g0699301	0.0512615
	Os04g0517100	Os10g0132300	0.0462302		Os04g0489600	Os04g0532400	0.045859		Os01g0141000	Os06g0699301	0.0496134
	Os05g0537100	Os10g0132300	0.0461861		Os11g0705200	Os04g0532400	0.0445457		Os02g0603600	Os06g0699301	0.0473139
	Os03g0182800	Os10g0132300	0.0403792		Os04g0590400	Os04g0532400	0.0445457		Os04g0590400	Os03g0138000	0.0543373
	Os06g0649000	Os10g0132300	0.0393759		Os01g0575200	Os04g0532400	0.0426048		Os09g0481700	Os03g0138000	0.0476749
	Os07g0178600	Os03g0838400	0.0462119		Os01g0140700	Os04g0532400	0.0421295		Os08g0485700	Os07g0572300	0.0542046
	Os07g0683200	Os03g0838400	0.0405577		Os10g0536100	Os10g0191300	0.049364		Os01g0975300	Os07g0572300	0.0480909
	Os03g0198600	Os04g0684900	0.0462098		Os05g0572000	Os10g0191300	0.04841		Os10g0376900	Os02g0437300	0.054182
	Os08g0159500	Os04g0684900	0.0417344		Os05g0322900	Os10g0191300	0.0474729		Os09g0434500	Os02g0437300	0.0534499
	Os02g0181300	Os12g0189300	0.0462084		Os01g0185900	Os10g0191300	0.0468704		Os04g0489600	Os02g0437300	0.0526201
	Os05g0537100	Os12g0189300	0.04204		Os04g0517100	Os10g0191300	0.0461344		Os01g0826400	Os07g0674100	0.0541613
	Os07g0683200	Os12g0189300	0.0395157		Os03g0764900	Os08g0495500	0.0493632		Os01g0218100	Os11g0123250	0.0541533
	Os10g0562100	Os01g0870400	0.0461946		Os09g0522200	Os02g0584700	0.0493593		Os02g0564700	Os11g0123250	0.0510904
	Os01g0141000	Os01g0870400	0.0425191		Os08g0386200	Os02g0584700	0.048381		Os09g0434500	Os11g0123250	0.0476557
	Os01g0575200	Os11g0558400	0.0461896		Os02g0181300	Os02g0584700	0.0446516		Os01g0935000	Os08g0174100	0.0541457
	Os01g0141000	Os11g0558400	0.0435153		Os03g0437200	Os02g0584700	0.0443174		Os03g0183200	Os06g0119900	0.054094
	Os10g0562100	Os11g0558400	0.0427267		Os03g0198600	Os02g0584700	0.0430857		Os06g0703900	Os06g0119900	0.0511814
	Os08g0249000	Os11g0558400	0.0397353		Os03g0198600	Os07g0614000	0.0493498		Os08g0159500	Os09g0246300	0.054083
	Os01g0575200	Os08g0137800	0.0461858		Os05g0525900	Os07g0614000	0.0484509		Os05g0442700	Os09g0246300	0.0494575
	Os10g0562100	Os08g0137800	0.0396956		Os07g0680400	Os07g0614000	0.0462649		Os01g0511000	Os11g0259700	0.0540663
	Os09g0481700	Os02g0306550	0.046174		Os02g0706600	Os07g0614000	0.0438106		Os05g0537100	Os03g0664800	0.0540099
	Os03g0231950	Os10g0565500	0.046103		Os01g0141000	Os07g0614000	0.0432909		Os09g0334500	Os03g0664800	0.0528921
	Os02g0132500	Os03g0649000	0.0460892		Os05g0195700	Os07g0542600	0.0493357		Os06g0726300	Os03g0664800	0.0490249
	Os03g0657400	Os03g0649000	0.0416713		Os01g0196300	Os06g0721800	0.0492413		Os02g0181300	Os03g0664800	0.0477709
	Os01g0140700	Os06g0729800	0.0460815		Os12g0105600	Os06g0721800	0.0472862		Os08g0386200	Os03g0664800	0.0459649
	Os04g0590400	Os06g0729800	0.0447065		Os11g0705200	Os04g0556400	0.0492303		Os08g0436700	Os10g0456800	0.0539714
	Os06g0663500	Os06g0729800	0.0410345		Os10g0562900	Os01g0136700	0.0491818		Os05g0361700	Os10g0456800	0.0472397
	Os03g0659700	Os09g0294300	0.0460571		Os03g0183000	Os01g0136700	0.0458812		Os01g0935000	Os08g0435800	0.0539386
	Os09g0410700	Os09g0294300	0.0459471		Os02g0181300	Os01g0949300	0.0491362		Os04g0557800	Os03g0184100	0.0539191
	Os02g0579000	Os09g0294300	0.0396302		Os04g0489600	Os04g0423100	0.0491057		Os02g0139000	Os03g0184100	0.0536059
	Os08g0504000	Os02g0532800	0.0460555		Os09g0572000	Os04g0423100	0.0478761		Os04g0569100	Os03g0184100	0.0463042
	Os01g0140700	Os02g0532800	0.0415624		Os01g0975300	Os04g0423100	0.0475622		Os04g0489600	Os05g0395000	0.0538947
	Os07g0178600	Os11g0261900	0.0460408		Os01g0826400	Os04g0423100	0.0460466		Os02g0132500	Os01g0192900	0.0538732
	Os05g0195700	Os04g0423600	0.0460253		Os09g0481700	Os04g0423100	0.042666		Os04g0590400	Os01g0192900	0.0506535
	Os06g0703900	Os04g0423600	0.0440325		Os10g0536100	Os01g0856000	0.0490124		Os04g0541700	Os01g0192900	0.0483984
	Os07g0225300	Os04g0423600	0.0436356		Os08g0442400	Os01g0856000	0.0480764		Os09g0434500	Os01g0192900	0.0463415
	Os08g0249000	Os03g0278900	0.045987		Os03g0666300	Os01g0856000	0.0471567		Os10g0376900	Os01g0192900	0.0461664
	Os06g0284500	Os03g0278900	0.0450182		Os09g0509700	Os01g0856000	0.0439445		Os08g0436700	Os01g0150900	0.0538404
	Os07g0683200	Os09g0561600	0.0459862		Os02g0132500	Os01g0856000	0.0439197		Os02g0603600	Os01g0150900	0.0528682
	Os04g0517100	Os09g0561600	0.0395037		Os03g0198600	Os01g0841700	0.0489728		Os01g0584900	Os01g0150900	0.0467385
	Os01g0192300	Os06g0682900	0.0459682		Os03g0437200	Os01g0841700	0.0485361		Os07g0688200	Os04g0391500	0.0537876
	Os02g0221100	Os11g0641500	0.045966		Os04g0515900	Os01g0841700	0.0461866		Os08g0562300	Os04g0391500	0.0476956
	Os05g0536250	Os11g0641500	0.042927		Os04g0517100	Os01g0841700	0.0437751		Os01g0867300	Os02g0826300	0.0537494
	Os05g0500600	Os03g0355900	0.0459472		Os09g0334500	Os01g0841700	0.0429481		Os03g0164300	Os02g0826300	0.051478
	Os03g0711100	Os03g0355900	0.039213		Os02g0654700	Os01g0841700	0.0424167		Os09g0549450	Os02g0826300	0.0474251
	Os01g0192300	Os07g0181100	0.0459375		Os01g0575200	Os01g0841700	0.041922		Os01g0935000	Os12g0123200	0.0537433
	Os03g0183000	Os02g0240100	0.0459077		Os02g0181300	Os02g0176000	0.0489722		Os04g0489600	Os12g0123200	0.0515941
	Os10g0536100	Os05g0267900	0.0458735		Os09g0334500	Os02g0176000	0.0468677		Os02g0603600	Os12g0123200	0.0499849
	Os02g0132500	Os05g0267900	0.0438433		Os09g0287000	Os02g0176000	0.0431223		Os05g0426200	Os06g0220100	0.0536597
	Os11g0603000	Os05g0267900	0.0430457		Os02g0654700	Os02g0176000	0.0427718		Os04g0557800	Os06g0220100	0.0486573
	Os04g0557800	Os05g0267900	0.0427878		Os04g0569100	Os03g0400800	0.0489676		Os01g0975300	Os05g0217800	0.0536057
	Os10g0376900	Os05g0267900	0.040395		Os03g0764900	Os03g0400800	0.0486501		Os05g0442700	Os05g0217800	0.0464168
	Os03g0183000	Os09g0471200	0.0458728		Os09g0509700	Os03g0400800	0.0477333		Os01g0575200	Os12g0242500	0.0535672
	Os10g0562900	Os09g0471200	0.045286		Os08g0546800	Os03g0400800	0.0475346		Os09g0286600	Os12g0242500	0.0531594
	Os01g0292900	Os09g0471200	0.0414544		Os08g0442400	Os03g0400800	0.0433427		Os01g0141000	Os12g0242500	0.0488468
	Os01g0292900	Os05g0303000	0.0458622		Os04g0541700	Os03g0400800	0.0429025		Os02g0638650	Os09g0472700	0.0535577
	Os10g0376900	Os10g0524700	0.0458289		Os09g0286600	Os03g0400800	0.0421747		Os04g0541700	Os02g0684400	0.0535334
	Os01g0935000	Os10g0524700	0.0408782		Os03g0183000	Os02g0199200	0.0489516		Os02g0221100	Os12g0617400	0.0535327
	Os10g0536100	Os10g0524700	0.0398413		Os03g0657400	Os02g0199200	0.0437997		Os03g0657400	Os12g0617400	0.048237
	Os02g0603600	Os10g0524700	0.0394003		Os01g0816100	Os02g0199200	0.0436252		Os01g0575200	Os05g0457200	0.0535192
	Os10g0490400	Os01g0954100	0.0457902		Os03g0860100	Os08g0260800	0.048918		Os01g0935000	Os05g0457200	0.0464358
	Os09g0286600	Os01g0954100	0.0420526		Os11g0603000	Os08g0260800	0.0458546		Os04g0489600	Os05g0457200	0.0456064
	Os08g0174500	Os03g0565900	0.0457818		Os04g0541700	Os10g0552600	0.0489173		Os04g0541700	Os03g0625300	0.05338
	Os07g0683200	Os03g0565900	0.042828		Os08g0442400	Os10g0552600	0.0449042		Os02g0221100	Os03g0625300	0.0513672
	Os10g0551200	Os05g0192700	0.0457483		Os04g0489600	Os10g0552600	0.0417829		Os05g0569300	Os10g0127900	0.0533487
	Os08g0249000	Os05g0192700	0.0406457		Os09g0434500	Os08g0355400	0.0489096		Os12g0515500	Os10g0127900	0.0467794
	Os05g0426200	Os07g0273600	0.0456893		Os10g0536100	Os08g0355400	0.0422794		Os10g0376900	Os09g0343200	0.0533039
	Os02g0695200	Os04g0403600	0.0456285		Os07g0680400	Os07g0650600	0.0488346		Os04g0590400	Os09g0343200	0.0475431
	Os11g0705200	Os04g0403600	0.0399232		Os01g0511000	Os07g0650600	0.0423965		Os09g0434500	Os09g0343200	0.0463514
	Os03g0188400	Os04g0223901	0.045604		Os05g0195700	Os06g0524400	0.0488006		Os05g0195700	Os06g0666100	0.0532675
	Os05g0572000	Os04g0223901	0.0412147		Os08g0416000	Os06g0524400	0.0463553		Os03g0764900	Os06g0666100	0.0502088
	Os08g0159500	Os02g0160500	0.0455802		Os05g0488600	Os06g0524400	0.0449297		Os08g0159500	Os06g0666100	0.0463113
	Os08g0174500	Os02g0160500	0.0393962		Os07g0225300	Os06g0524400	0.0442258		Os02g0221100	Os06g0666100	0.0463086
	Os09g0287000	Os08g0539700	0.0455457		Os03g0183200	Os05g0542732	0.048637		Os09g0334500	Os09g0538600	0.0532651
	Os09g0286600	Os08g0539700	0.0393824		Os02g0181300	Os02g0584800	0.0485629		Os01g0246700	Os09g0538600	0.0512955
	Os04g0590400	Os01g0959750	0.0455457		Os04g0517100	Os02g0584800	0.0483339		Os08g0562300	Os09g0538600	0.0474379
	Os08g0537900	Os01g0959750	0.0414532		Os01g0575200	Os02g0584800	0.0478266		Os05g0537100	Os09g0538600	0.0466855
	Os05g0426200	Os11g0681400	0.045543		Os03g0437200	Os02g0584800	0.0442063		Os06g0166400	Os09g0538600	0.0458555
	Os11g0707300	Os05g0530300	0.0455419		Os09g0522200	Os02g0584800	0.0436724		Os04g0557800	Os07g0273600	0.0532162
	Os01g0185900	Os09g0561500	0.0455395		Os08g0386200	Os02g0584800	0.0426786		Os05g0426200	Os07g0273600	0.0515989
	Os04g0590400	Os08g0203600	0.0455195		Os09g0334500	Os02g0584800	0.0422194		Os04g0541700	Os03g0320100	0.0531887
	Os10g0536100	Os08g0203600	0.0388828		Os01g0826400	Os02g0584800	0.0414886		Os05g0322900	Os07g0686800	0.0531659
	Os05g0553400	Os12g0527700	0.045516		Os12g0515500	Os10g0127900	0.0485376		Os08g0485700	Os09g0322500	0.0531434
	Os10g0536100	Os01g0505700	0.0454928		Os07g0683200	Os10g0127900	0.0473875		Os01g0826400	Os09g0322500	0.0457114
	Os11g0705200	Os01g0505700	0.0445835		Os06g0662200	Os10g0127900	0.0471747		Os09g0481700	Os01g0215500	0.0531238
	Os01g0292900	Os01g0505700	0.0425776		Os03g0437200	Os10g0127900	0.0458423		Os04g0590400	Os01g0215500	0.0462403
	Os03g0720800	Os01g0505700	0.0422276		Os01g0975300	Os10g0127900	0.0448216		Os05g0442700	Os02g0730000	0.0530972
	Os06g0663500	Os01g0505700	0.0404649		Os05g0553400	Os07g0493800	0.0485016		Os01g0141000	Os03g0388100	0.0530546
	Os08g0504000	Os01g0505700	0.0389276		Os03g0183000	Os07g0493800	0.0484476		Os09g0286600	Os03g0388100	0.0525081
	Os12g0586300	Os01g0972200	0.0454907		Os01g0826400	Os07g0493800	0.0430212		Os01g0575200	Os03g0388100	0.0474764
	Os06g0703900	Os01g0695700	0.0454714		Os01g0816100	Os07g0493800	0.0417133		Os09g0572000	Os03g0388100	0.0464288
	Os05g0488600	Os01g0695700	0.0437644		Os05g0183100	Os10g0537800	0.0483559		Os07g0680400	Os08g0140300	0.0530537
	Os01g0816100	Os10g0134500	0.0454701		Os03g0657400	Os02g0822900	0.0483152		Os05g0183100	Os08g0140300	0.0518911
	Os01g0292900	Os10g0134500	0.0399511		Os10g0562900	Os02g0822900	0.0467916		Os07g0683200	Os08g0140300	0.0506296
	Os03g0657400	Os08g0119800	0.0454699		Os01g0141000	Os02g0822900	0.0426534		Os05g0442700	Os08g0414700	0.0530514
	Os04g0590400	Os08g0119800	0.0442395		Os08g0442400	Os12g0438300	0.0483136		Os08g0159500	Os01g0351800	0.0530298
	Os11g0705200	Os08g0119800	0.0419473		Os04g0569100	Os12g0438300	0.0471314		Os02g0221100	Os07g0611400	0.0530153
	Os08g0537900	Os08g0119800	0.0415641		Os01g0192300	Os12g0438300	0.0459544		Os03g0657400	Os07g0611400	0.0526949
	Os06g0663500	Os08g0119800	0.0390224		Os09g0509700	Os12g0438300	0.0452908		Os01g0975300	Os07g0611400	0.0510336
	Os03g0821200	Os08g0119800	0.0389507		Os03g0764900	Os12g0438300	0.0431656		Os08g0562300	Os07g0611400	0.0503015
	Os03g0657400	Os04g0282400	0.0454477		Os03g0183200	Os01g0720400	0.0482049		Os08g0159500	Os04g0657300	0.0529909
	Os08g0442400	Os04g0282400	0.0430663		Os01g0826400	Os12g0170800	0.0481849		Os01g0975300	Os01g0660200	0.0529638
	Os02g0579000	Os04g0282400	0.0424177		Os06g0649000	Os12g0170800	0.0478448		Os07g0680400	Os01g0660200	0.0504302
	Os01g0524500	Os04g0282400	0.0416451		Os09g0572000	Os12g0170800	0.0436615		Os05g0553400	Os01g0660200	0.0488614
	Os10g0490400	Os04g0282400	0.0395101		Os07g0680400	Os12g0170800	0.0415327		Os05g0426200	Os04g0444300	0.0529617
	Os03g0657400	Os11g0549300	0.0454221		Os05g0572000	Os04g0423400	0.0481245		Os01g0867300	Os02g0590400	0.0529122
	Os01g0935000	Os11g0549300	0.0446938		Os09g0509700	Os04g0423400	0.0446087		Os07g0683200	Os02g0590400	0.0497075
	Os01g0975300	Os11g0549300	0.0435637		Os02g0706600	Os01g0870400	0.0480971		Os05g0444200	Os02g0590400	0.0462636
	Os06g0663500	Os12g0553800	0.0453837		Os01g0141000	Os01g0870400	0.0467275		Os05g0442700	Os02g0590400	0.0461065
	Os10g0536100	Os12g0553800	0.0431965		Os05g0525900	Os01g0870400	0.0451576		Os01g0196300	Os03g0661600	0.0529006
	Os11g0705200	Os12g0553800	0.04246		Os09g0410700	Os01g0870400	0.0439459		Os08g0386200	Os03g0661600	0.0456724
	Os04g0590400	Os12g0553800	0.0388559		Os06g0649000	Os01g0921100	0.0480305		Os12g0515500	Os06g0294000	0.0528376
	Os05g0579600	Os04g0668800	0.0453783		Os02g0181300	Os01g0921100	0.0460093		Os05g0488600	Os06g0294000	0.048939
	Os10g0376900	Os04g0668800	0.0408987		Os05g0525900	Os01g0921100	0.0453416		Os09g0287000	Os06g0294000	0.0479899
	Os05g0500600	Os04g0457000	0.0453612		Os09g0334500	Os01g0921100	0.0418509		Os09g0286600	Os06g0294000	0.0473458
	Os04g0515900	Os01g0798900	0.0453597		Os03g0764100	Os03g0806600	0.0480172		Os01g0867300	Os12g0550800	0.0528018
	Os05g0426200	Os04g0444300	0.0453526		Os01g0816100	Os03g0806600	0.0479989		Os07g0683200	Os12g0550800	0.0471583
	Os12g0586300	Os04g0444300	0.0438197		Os09g0287000	Os03g0854000	0.0480042		Os02g0181300	Os03g0794200	0.0527987
	Os10g0562900	Os04g0444300	0.0392738		Os09g0334500	Os03g0854000	0.0473759		Os09g0287000	Os03g0794200	0.0489259
	Os08g0357300	Os04g0659300	0.0453484		Os02g0181300	Os03g0854000	0.0449779		Os08g0436700	Os01g0704100	0.052765
	Os03g0327800	Os04g0659300	0.0404123		Os02g0654700	Os03g0854000	0.0431187		Os03g0198600	Os06g0725000	0.052742
	Os04g0489600	Os05g0324100	0.0453284		Os03g0657400	Os10g0491450	0.0479529		Os05g0488600	Os06g0725000	0.0467407
	Os09g0431900	Os05g0324100	0.0445138		Os03g0183000	Os10g0491450	0.0427819		Os03g0657400	Os01g0713200	0.0527141
	Os08g0159500	Os11g0644600	0.0453104		Os02g0603600	Os06g0301400	0.0479431		Os08g0562300	Os01g0713200	0.0492273
	Os10g0376900	Os11g0644600	0.0408387		Os01g0625300	Os06g0301400	0.0461522		Os02g0221100	Os01g0713200	0.0480123
	Os10g0536100	Os04g0598200	0.0452557		Os09g0334500	Os01g0888900	0.0479247		Os06g0166400	Os03g0184550	0.0527012
	Os01g0292900	Os04g0598200	0.0448422		Os04g0546800	Os01g0888900	0.0432122		Os07g0158500	Os03g0184550	0.0484138
	Os06g0519400	Os04g0598200	0.0427472		Os04g0489600	Os03g0684700	0.0478368		Os01g0305900	Os03g0184550	0.048045
	Os04g0590400	Os04g0598200	0.0388224		Os01g0826400	Os03g0684700	0.0476212		Os05g0579600	Os11g0543500	0.0526877
	Os02g0695200	Os10g0330000	0.0452323		Os10g0376900	Os03g0684700	0.0445437		Os10g0376900	Os11g0543500	0.0506841
	Os10g0536100	Os10g0330000	0.0418144		Os03g0183000	Os03g0684700	0.043087		Os01g0141000	Os01g0846300	0.0526227
	Os04g0489600	Os10g0330000	0.0393097		Os08g0386200	Os01g0604500	0.0477846		Os01g0935000	Os01g0846300	0.051021
	Os01g0140700	Os07g0691800	0.0452153		Os09g0334500	Os01g0604500	0.0409197		Os01g0575200	Os06g0535400	0.0525442
	Os10g0536100	Os07g0691800	0.0409421		Os05g0553400	Os03g0660500	0.0477768		Os08g0485700	Os06g0535400	0.0450821
	Os03g0820300	Os05g0119200	0.045209		Os01g0298400	Os04g0486950	0.0477613		Os05g0426200	Os11g0482200	0.0525364
	Os05g0488600	Os02g0121500	0.0452015		Os07g0683200	Os04g0486950	0.0446109		Os08g0485700	Os06g0278000	0.052481
	Os02g0174300	Os06g0587900	0.0451991		Os01g0975300	Os04g0486950	0.0437126		Os01g0975300	Os06g0278000	0.0458175
	Os03g0711100	Os04g0594400	0.0451748		Os04g0540200	Os03g0232200	0.0476868		Os01g0141000	Os04g0226340	0.0524689
	Os06g0703900	Os06g0671600	0.0451712		Os05g0361700	Os03g0232200	0.0466113		Os02g0603600	Os04g0226340	0.048013
	Os01g0975300	Os06g0671600	0.043303		Os07g0225300	Os03g0232200	0.0458941		Os10g0562900	Os04g0226340	0.0475234
	Os08g0159500	Os05g0541301	0.0451658		Os10g0536100	Os01g0737500	0.0476277		Os09g0287000	Os06g0683100	0.0524608
	Os03g0820300	Os03g0161600	0.0451391		Os09g0334500	Os11g0226966	0.0475634		Os09g0286600	Os06g0683100	0.0473384
	Os08g0537900	Os01g0869800	0.0451242		Os02g0181300	Os11g0226966	0.0460047		Os03g0657400	Os06g0683100	0.0453721
	Os08g0159500	Os01g0869800	0.0441205		Os09g0417600	Os03g0187800	0.0475588		Os10g0376900	Os10g0524700	0.0524243
	Os04g0493000	Os01g0869800	0.0413287		Os05g0553400	Os03g0187800	0.0411467		Os02g0603600	Os10g0524700	0.0459795
	Os11g0705200	Os03g0310666	0.0451162		Os01g0192300	Os11g0428500	0.0474308		Os04g0557800	Os10g0524700	0.0453087
	Os01g0192300	Os04g0521700	0.0451117		Os03g0657400	Os11g0428500	0.0472561		Os05g0537100	Os07g0619500	0.0524047
	Os02g0649300	Os04g0521700	0.0438678		Os06g0662200	Os11g0428500	0.0443144		Os09g0334500	Os07g0619500	0.048664
	Os01g0575200	Os04g0521700	0.0430373		Os09g0434500	Os11g0428500	0.0436938		Os02g0181300	Os07g0619500	0.0465857
	Os01g0140700	Os04g0521700	0.041172		Os10g0536100	Os11g0428500	0.0412645		Os06g0726300	Os07g0619500	0.0449623
	Os04g0541700	Os04g0521700	0.0398991		Os11g0603000	Os01g0947800	0.0474177		Os08g0159500	Os10g0140300	0.0523926
	Os01g0192300	Os01g0944100	0.0451099		Os04g0590400	Os01g0947800	0.0448526		Os02g0221100	Os10g0140300	0.0480717
	Os03g0657400	Os01g0721200	0.0450862		Os10g0536100	Os01g0947800	0.0420366		Os03g0764900	Os10g0140300	0.0461324
	Os01g0975300	Os01g0721200	0.0425555		Os10g0376900	Os01g0947800	0.0406395		Os04g0590400	Os04g0532400	0.0523839
	Os07g0680400	Os01g0721200	0.0413197		Os11g0705200	Os12g0512800	0.047407		Os03g0657400	Os04g0532400	0.051184
	Os03g0821200	Os04g0169500	0.045077		Os09g0417600	Os12g0512800	0.0435579		Os08g0485700	Os04g0532400	0.046006
	Os03g0720800	Os04g0169500	0.0421667		Os02g0603600	Os06g0487620	0.047381		Os05g0442700	Os01g0128100	0.0523543
	Os06g0519400	Os03g0243100	0.0450714		Os09g0286600	Os06g0487620	0.0435109		Os01g0935000	Os01g0580500	0.0522683
	Os01g0975300	Os04g0585700	0.0450669		Os03g0437200	Os05g0181700	0.0472441		Os09g0434500	Os01g0580500	0.0505819
	Os07g0158500	Os04g0585700	0.0441306		Os01g0826400	Os05g0181700	0.045536		Os02g0132500	Os01g0580500	0.0492682
	Os09g0481700	Os04g0585700	0.0385296		Os04g0515900	Os05g0181700	0.0408251		Os02g0603600	Os01g0580500	0.0465177
	Os02g0732600	Os10g0465700	0.0450444		Os01g0575200	Os05g0181700	0.0407705		Os04g0590400	Os01g0580500	0.0452673
	Os04g0590400	Os07g0686300	0.0450409		Os03g0764100	Os02g0632900	0.0472416		Os02g0603600	Os03g0834050	0.0521919
	Os04g0541700	Os07g0686300	0.0424659		Os07g0680400	Os11g0226933	0.0472259		Os04g0489600	Os03g0834050	0.048035
	Os10g0376900	Os07g0686300	0.0408247		Os01g0511000	Os11g0226933	0.0448713		Os10g0376900	Os03g0834050	0.0453955
	Os10g0536100	Os07g0686300	0.0406301		Os09g0379600	Os01g0933200	0.0472185		Os01g0575200	Os09g0520500	0.0521298
	Os02g0695200	Os03g0724500	0.0450347		Os01g0192300	Os01g0933200	0.0428271		Os04g0541700	Os09g0520500	0.0510548
	Os09g0286600	Os11g0118500	0.0450341		Os08g0546800	Os01g0933200	0.0411525		Os01g0935000	Os09g0520500	0.045855
	Os05g0343400	Os11g0118500	0.0411525		Os02g0654700	Os02g0209300	0.0471148		Os08g0159500	Os09g0520500	0.0453075
	Os04g0590400	Os09g0325700	0.0450278		Os03g0437200	Os02g0209300	0.0416412		Os05g0553400	Os02g0282000	0.0521218
	Os06g0663500	Os09g0325700	0.0416246		Os01g0575200	Os02g0209300	0.0411872		Os04g0557800	Os01g0365000	0.0520905
	Os01g0140700	Os09g0325700	0.0409435		Os05g0553400	Os02g0701900	0.0470832		Os03g0657400	Os01g0365000	0.0482543
	Os08g0504000	Os09g0325700	0.0399232		Os01g0826400	Os02g0701900	0.0441133		Os02g0603600	Os01g0365000	0.0474755
	Os10g0536100	Os09g0325700	0.0392089		Os05g0195700	Os02g0701900	0.0403364		Os09g0434500	Os01g0365000	0.0467758
	Os08g0159500	Os01g0690800	0.0450079		Os08g0386200	Os01g0384800	0.0470651		Os06g0703900	Os11g0598500	0.0520883
	Os01g0816100	Os01g0690800	0.0396815		Os03g0815100	Os01g0384800	0.0452328		Os08g0562300	Os11g0598500	0.0448959
	Os04g0541700	Os02g0208500	0.0449748		Os02g0181300	Os01g0384800	0.045226		Os04g0517100	Os03g0676400	0.0520612
	Os03g0609500	Os02g0208500	0.0396289		Os03g0198600	Os01g0384800	0.0445021		Os03g0437200	Os03g0676400	0.0476424
	Os11g0707300	Os06g0666100	0.0449684		Os09g0334500	Os01g0384800	0.042364		Os03g0198600	Os03g0676400	0.0450757
	Os12g0586300	Os06g0666100	0.0410525		Os01g0575200	Os01g0384800	0.0423342		Os05g0444200	Os10g0540200	0.0520414
	Os03g0188400	Os10g0529600	0.0449677		Os05g0343400	Os01g0384800	0.0419691		Os05g0569300	Os10g0540200	0.0489137
	Os06g0663500	Os10g0529600	0.0388772		Os01g0826400	Os01g0384800	0.0409924		Os03g0437200	Os09g0561500	0.0520324
	Os08g0249000	Os02g0698000	0.0449394		Os04g0517100	Os01g0384800	0.0403085		Os05g0322900	Os09g0561500	0.051003
	Os03g0609500	Os02g0698000	0.0382419		Os09g0509700	Os05g0395116	0.0470586		Os04g0517100	Os09g0561500	0.050125
	Os07g0680400	Os04g0127200	0.0448905		Os09g0334500	Os12g0592900	0.0469009		Os08g0159500	Os01g0727500	0.0519886
	Os01g0292900	Os10g0509401	0.0448833		Os01g0511000	Os12g0592900	0.0430675		Os08g0485700	Os01g0727500	0.0515665
	Os10g0536100	Os10g0509401	0.0399424		Os02g0181300	Os12g0592900	0.041173		Os01g0140700	Os01g0727500	0.0496337
	Os03g0657400	Os10g0509401	0.0389932		Os03g0764100	Os02g0738200	0.0468766		Os01g0218100	Os01g0727500	0.0489174
	Os04g0550200	Os07g0678300	0.0448689		Os05g0553400	Os02g0738200	0.0419303		Os04g0590400	Os01g0727500	0.0488258
	Os01g0928000	Os07g0678300	0.0428626		Os04g0515900	Os03g0234500	0.0468627		Os04g0489600	Os01g0727500	0.0448934
	Os10g0376900	Os09g0343200	0.0448611		Os01g0140700	Os03g0234500	0.0417969		Os05g0442700	Os11g0251400	0.0519772
	Os10g0536100	Os09g0343200	0.0433286		Os07g0680400	Os04g0403400	0.0468622		Os05g0569300	Os11g0251400	0.0445055
	Os04g0541700	Os09g0343200	0.0408314		Os07g0683200	Os03g0342100	0.0468514		Os08g0159500	Os08g0462900	0.0519307
	Os04g0489600	Os09g0343200	0.0395564		Os07g0225300	Os03g0342100	0.0438965		Os10g0376900	Os08g0462900	0.0467687
	Os12g0586300	Os01g0616900	0.0448331		Os02g0654700	Os01g0127900	0.0468505		Os09g0572000	Os08g0189900	0.0518996
	Os08g0249000	Os01g0616900	0.0446351		Os05g0343400	Os01g0127900	0.0437575		Os01g0826400	Os08g0189900	0.0456877
	Os02g0221100	Os01g0616900	0.0400269		Os03g0764100	Os01g0127900	0.0422284		Os05g0569300	Os01g0717400	0.0518971
	Os06g0284500	Os01g0616900	0.0393001		Os01g0298400	Os01g0127900	0.0417355		Os09g0334500	Os01g0717400	0.0498815
	Os01g0140700	Os01g0136300	0.0448286		Os01g0826400	Os01g0389700	0.0467548		Os07g0158500	Os01g0717400	0.0465491
	Os04g0590400	Os01g0136300	0.0413867		Os01g0511000	Os05g0181300	0.0467501		Os04g0557800	Os01g0717400	0.0450212
	Os04g0489600	Os01g0136300	0.0409959		Os09g0522200	Os05g0181300	0.0416915		Os07g0680400	Os07g0142900	0.0518769
	Os06g0519400	Os11g0427800	0.0448279		Os05g0525900	Os05g0181300	0.0403449		Os08g0159500	Os05g0217700	0.0518437
	Os11g0707300	Os11g0427800	0.0446484		Os10g0562900	Os07g0150700	0.0466502		Os10g0376900	Os05g0217700	0.0481276
	Os01g0575200	Os11g0427800	0.0441506		Os03g0657400	Os07g0150700	0.0462066		Os02g0806300	Os07g0645300	0.0518223
	Os11g0705200	Os11g0427800	0.0410435		Os05g0488600	Os03g0679700	0.0465422		Os08g0159500	Os07g0645300	0.0503813
	Os07g0680400	Os04g0468000	0.0448146		Os09g0410700	Os05g0427400	0.0465217		Os11g0684000	Os02g0472700	0.051814
	Os03g0327800	Os06g0689600	0.044813		Os03g0666300	Os01g0757900	0.0465171		Os08g0485700	Os10g0209700	0.0517417
	Os03g0182800	Os06g0689600	0.0399122		Os03g0764100	Os01g0757900	0.0441075		Os02g0603600	Os05g0473000	0.0517291
	Os04g0541700	Os03g0848700	0.0448094		Os01g0140700	Os11g0676500	0.0464881		Os09g0434500	Os05g0473000	0.0494535
	Os12g0612700	Os02g0736200	0.0447758		Os05g0553400	Os11g0676500	0.0461709		Os11g0603000	Os05g0473000	0.0466286
	Os09g0410700	Os08g0137300	0.04477		Os07g0680400	Os11g0676500	0.0422511		Os05g0442700	Os04g0122000	0.0516822
	Os03g0659700	Os08g0137300	0.0382608		Os01g0975300	Os11g0598500	0.0464857		Os01g0140700	Os03g0650200	0.0516744
	Os08g0537900	Os09g0325800	0.0447496		Os01g0511000	Os07g0528200	0.0464528		Os03g0657400	Os03g0650200	0.0510624
	Os01g0140700	Os09g0325800	0.0418264		Os09g0572000	Os07g0528200	0.0438676		Os04g0590400	Os03g0650200	0.0482311
	Os03g0821200	Os09g0325800	0.0400463		Os06g0649000	Os07g0528200	0.0424858		Os09g0434500	Os03g0650200	0.0468107
	Os01g0140700	Os03g0244700	0.0447187		Os02g0654700	Os08g0482700	0.0464279		Os06g0703900	Os04g0136700	0.0516572
	Os07g0680400	Os03g0244700	0.039429		Os02g0638650	Os03g0663700	0.0463043		Os05g0442700	Os04g0136700	0.0467234
	Os01g0524500	Os03g0244700	0.0380552		Os12g0515500	Os03g0663700	0.0462608		Os09g0434500	Os06g0179200	0.0516398
	Os04g0590400	Os06g0618700	0.0446805		Os04g0540200	Os03g0663700	0.0456992		Os02g0603600	Os06g0179200	0.0503677
	Os10g0376900	Os06g0618700	0.0417047		Os01g0511000	Os03g0663700	0.0418896		Os04g0590400	Os06g0179200	0.0496293
	Os04g0489600	Os06g0618700	0.038192		Os03g0198600	Os02g0156600	0.0462227		Os03g0198600	Os05g0537400	0.0515977
	Os09g0286600	Os01g0326300	0.0446628		Os02g0654700	Os02g0156600	0.0409823		Os05g0525900	Os05g0537400	0.0511153
	Os01g0192300	Os01g0326300	0.0436543		Os01g0575200	Os02g0156600	0.0399058		Os06g0726300	Os03g0153900	0.0515955
	Os04g0541700	Os01g0326300	0.0386463		Os07g0225300	Os02g0156600	0.0395388		Os01g0695900	Os03g0153900	0.0507568
	Os07g0680400	Os05g0493100	0.0446626		Os07g0680400	Os12g0639600	0.046205		Os05g0183100	Os03g0153900	0.0479021
	Os06g0649000	Os09g0511200	0.044638		Os03g0657400	Os01g0963000	0.0460443		Os05g0442700	Os05g0107900	0.0515837
	Os04g0546800	Os09g0511200	0.041644		Os01g0975300	Os05g0507300	0.045997		Os08g0159500	Os05g0107900	0.0509099
	Os02g0181300	Os09g0511200	0.0381634		Os05g0553400	Os05g0507300	0.0457791		Os02g0221100	Os05g0107900	0.0442951
	Os10g0562100	Os07g0142900	0.0446092		Os07g0680400	Os05g0507300	0.0427938		Os02g0221100	Os08g0192300	0.0515538
	Os09g0286600	Os06g0487620	0.0446003		Os09g0572000	Os05g0507300	0.041125		Os08g0159500	Os08g0192300	0.0469942
	Os02g0149900	Os06g0120200	0.0445809		Os08g0546800	Os04g0223500	0.0459647		Os03g0764900	Os08g0192300	0.0467658
	Os11g0707300	Os06g0120200	0.0396664		Os07g0558100	Os04g0223500	0.0445558		Os05g0195700	Os08g0192300	0.0444318
	Os02g0695200	Os08g0557600	0.0445555		Os01g0192300	Os04g0223500	0.0436369		Os09g0334500	Os09g0400500	0.0515338
	Os02g0732600	Os03g0175200	0.0445319		Os03g0764900	Os04g0223500	0.0428126		Os01g0975300	Os06g0110000	0.0515122
	Os04g0493000	Os03g0175200	0.0407541		Os09g0509700	Os04g0223500	0.0427583		Os08g0159500	Os06g0110000	0.0449426
	Os02g0178100	Os03g0175200	0.039058		Os12g0515500	Os04g0223500	0.0415635		Os04g0541700	Os02g0122600	0.0514394
	Os10g0490400	Os03g0175200	0.0380777		Os04g0541700	Os04g0223500	0.0404117		Os01g0935000	Os02g0122600	0.044759
	Os08g0536800	Os03g0370800	0.0445306		Os02g0603600	Os04g0444300	0.0458941		Os08g0436700	Os04g0171800	0.0514332
	Os03g0135700	Os03g0370800	0.0388841		Os01g0141000	Os04g0444300	0.0446169		Os02g0603600	Os04g0171800	0.0455038
	Os08g0159500	Os01g0208700	0.0445098		Os10g0562900	Os04g0444300	0.0429971		Os03g0815100	Os02g0759400	0.0514002
	Os10g0376900	Os01g0208700	0.0379378		Os01g0140700	Os08g0189900	0.0458863		Os08g0159500	Os02g0759400	0.0448388
	Os01g0975300	Os04g0136700	0.044502		Os01g0185900	Os08g0189900	0.0440035		Os10g0376900	Os04g0430200	0.0512766
	Os06g0703900	Os04g0136700	0.0417213		Os07g0680400	Os08g0189900	0.0434472		Os08g0159500	Os04g0430200	0.0499352
	Os07g0688200	Os04g0136700	0.0412866		Os01g0575200	Os08g0189900	0.0432381		Os05g0442700	Os04g0430200	0.0456972
	Os03g0327800	Os04g0136700	0.0388406		Os09g0572000	Os08g0189900	0.0411414		Os01g0935000	Os11g0546300	0.0512765
	Os10g0551200	Os02g0804400	0.0444894		Os09g0410700	Os08g0189900	0.0408069		Os01g0575200	Os11g0546300	0.0470208
	Os05g0572000	Os02g0804400	0.0432476		Os04g0515900	Os08g0189900	0.039136		Os09g0286600	Os11g0546300	0.0466889
	Os03g0711100	Os02g0804400	0.0430743		Os09g0417600	Os10g0394000	0.0458357		Os06g0728700	Os11g0546300	0.0453905
	Os08g0174500	Os02g0804400	0.04134		Os05g0322900	Os10g0394000	0.0456329		Os01g0575200	Os10g0506100	0.0512373
	Os08g0159500	Os02g0804400	0.0390039		Os12g0105600	Os10g0394000	0.0441476		Os03g0657400	Os10g0506100	0.0509747
	Os03g0109000	Os01g0822800	0.0444746		Os04g0517100	Os10g0394000	0.0430042		Os04g0590400	Os10g0506100	0.0482186
	Os09g0481700	Os01g0822800	0.0442523		Os06g0649000	Os10g0469700	0.0457451		Os01g0140700	Os10g0506100	0.0456353
	Os10g0536100	Os01g0822800	0.0381989		Os02g0181300	Os02g0807800	0.0456402		Os07g0688200	Os06g0184866	0.0511976
	Os03g0109000	Os11g0442380	0.0444674		Os01g0575200	Os02g0807800	0.0433814		Os08g0485700	Os06g0184866	0.0511875
	Os05g0322900	Os11g0665600	0.0444638		Os09g0572000	Os02g0807800	0.0431255		Os01g0975300	Os06g0184866	0.0487702
	Os03g0821200	Os11g0665600	0.0411314		Os11g0705200	Os02g0807800	0.0422914		Os10g0376900	Os09g0339000	0.0511647
	Os05g0500600	Os11g0665600	0.0385716		Os02g0654700	Os02g0807800	0.0407975		Os09g0434500	Os09g0339000	0.0473763
	Os03g0659700	Os08g0112900	0.0444586		Os01g0140700	Os08g0190100	0.045598		Os04g0590400	Os12g0629700	0.0511236
	Os01g0185900	Os08g0112900	0.0410193		Os05g0553400	Os08g0190100	0.0427467		Os07g0680400	Os12g0629700	0.0492934
	Os02g0603600	Os08g0112900	0.0388389		Os09g0410700	Os05g0499800	0.0455734		Os02g0638650	Os12g0139400	0.0511097
	Os04g0515900	Os08g0112900	0.0382337		Os11g0175700	Os05g0499800	0.040045		Os12g0515500	Os12g0139400	0.046678
	Os08g0249000	Os03g0625300	0.0444477		Os01g0218100	Os05g0499800	0.0391313		Os05g0488600	Os12g0139400	0.0462962
	Os08g0159500	Os11g0595200	0.0444448		Os04g0541700	Os05g0499800	0.0389494		Os03g0764900	Os12g0139400	0.0448761
	Os04g0493000	Os11g0595200	0.0417146		Os09g0417600	Os01g0714600	0.0455603		Os04g0540200	Os12g0139400	0.0438618
	Os08g0504000	Os03g0351500	0.0444427		Os03g0437200	Os01g0714600	0.044977		Os05g0569300	Os05g0475300	0.0510801
	Os01g0140700	Os03g0351500	0.0416057		Os01g0575200	Os01g0714600	0.0431964		Os08g0562300	Os05g0475300	0.0478113
	Os03g0821200	Os03g0351500	0.0407802		Os09g0410700	Os01g0714600	0.0412577		Os01g0826400	Os05g0475300	0.0461561
	Os11g0707300	Os03g0351500	0.0387663		Os02g0181300	Os01g0714600	0.0400317		Os02g0603600	Os01g0745000	0.0510551
	Os03g0815100	Os01g0384800	0.0444297		Os05g0343400	Os01g0714600	0.0399738		Os04g0541700	Os01g0745000	0.0476809
	Os03g0198600	Os01g0384800	0.0415261		Os02g0181300	Os02g0703300	0.0455523		Os09g0434500	Os01g0745000	0.044172
	Os05g0500600	Os01g0384800	0.0409287		Os09g0334500	Os02g0703300	0.0451781		Os04g0590400	Os01g0745000	0.044159
	Os01g0575200	Os01g0384800	0.0404753		Os04g0541700	Os03g0848700	0.0455367		Os04g0489600	Os01g0745000	0.0440753
	Os02g0221100	Os01g0884400	0.0444255		Os04g0590400	Os03g0848700	0.0440706		Os03g0183000	Os04g0109100	0.0510015
	Os01g0140700	Os03g0341300	0.0443885		Os09g0509700	Os03g0848700	0.0432948		Os01g0575200	Os01g0648000	0.0509457
	Os06g0663500	Os06g0147000	0.0443585		Os01g0575200	Os01g0899200	0.0455172		Os02g0221100	Os07g0251900	0.0509385
	Os01g0575200	Os06g0147000	0.0391303		Os09g0410700	Os01g0899200	0.0444245		Os07g0680400	Os07g0251900	0.048262
	Os08g0537900	Os05g0583400	0.0443498		Os09g0286600	Os01g0899200	0.0393654		Os01g0975300	Os07g0251900	0.0451608
	Os10g0536100	Os05g0583400	0.0438182		Os09g0509700	Os03g0320100	0.0454995		Os02g0181300	Os02g0176000	0.05093
	Os03g0657400	Os05g0583400	0.0421428		Os08g0546800	Os03g0320100	0.0431742		Os05g0183100	Os10g0164001	0.05092
	Os04g0590400	Os05g0583400	0.039595		Os12g0515500	Os03g0320100	0.0423716		Os06g0726300	Os10g0164001	0.0447102
	Os03g0720800	Os05g0583400	0.0387178		Os08g0442400	Os03g0320100	0.0402709		Os09g0434500	Os10g0163220	0.0508409
	Os01g0524500	Os07g0162100	0.0443485		Os04g0569100	Os03g0320100	0.0396121		Os04g0489600	Os10g0163220	0.0460446
	Os10g0490400	Os07g0162100	0.0435345		Os04g0590400	Os03g0320100	0.0387573		Os10g0376900	Os06g0725200	0.0507951
	Os08g0174500	Os07g0631200	0.0443429		Os06g0662200	Os04g0439300	0.0454862		Os09g0434500	Os06g0725200	0.0488773
	Os08g0159500	Os07g0631200	0.039683		Os01g0575200	Os04g0439300	0.0421174		Os04g0489600	Os06g0725200	0.0453101
	Os05g0500600	Os07g0631200	0.0378029		Os01g0192300	Os04g0439300	0.0410568		Os11g0603000	Os06g0725200	0.044054
	Os09g0286600	Os06g0649900	0.0443423		Os07g0617000	Os09g0468150	0.0453923		Os02g0132500	Os06g0725200	0.0436844
	Os01g0292900	Os11g0547800	0.0443412		Os04g0540200	Os11g0208900	0.0453722		Os03g0437200	Os01g0916100	0.0507337
	Os09g0481700	Os11g0547800	0.0380926		Os01g0298400	Os11g0208900	0.0397192		Os02g0181300	Os04g0142400	0.0506968
	Os07g0688200	Os07g0690900	0.0443352		Os01g0511000	Os11g0208900	0.0396147		Os09g0334500	Os04g0142400	0.0462021
	Os02g0624300	Os07g0690900	0.0419751		Os05g0488600	Os11g0208900	0.0394846		Os06g0726300	Os04g0142400	0.0446603
	Os06g0703900	Os07g0690900	0.0419362		Os09g0410700	Os01g0947000	0.0453716		Os05g0537100	Os04g0142400	0.0442421
	Os09g0410700	Os07g0690900	0.0404166		Os03g0764100	Os01g0947000	0.0440092		Os06g0562300	Os06g0613600	0.0506162
	Os09g0417600	Os08g0138200	0.0443266		Os06g0649000	Os01g0947000	0.043193		Os03g0657400	Os04g0674700	0.0505843
	Os06g0703900	Os08g0138200	0.0411342		Os09g0481700	Os01g0947000	0.0416642		Os06g0703900	Os08g0356500	0.0505039
	Os03g0183000	Os07g0575500	0.0443178		Os05g0343400	Os01g0947000	0.0392952		Os02g0654700	Os08g0356500	0.0498914
	Os05g0537100	Os07g0575500	0.0399207		Os02g0181300	Os12g0159000	0.0453217		Os06g0649000	Os08g0356500	0.0486779
	Os03g0711100	Os04g0562800	0.044317		Os02g0654700	Os08g0448000	0.045244		Os05g0537100	Os08g0137900	0.0504361
	Os08g0537900	Os07g0603300	0.0443165		Os01g0575200	Os08g0448000	0.0421011		Os04g0517100	Os08g0137900	0.0430495
	Os08g0249000	Os07g0603300	0.038735		Os04g0517100	Os08g0448000	0.041613		Os02g0806300	Os12g0594000	0.0503661
	Os02g0174300	Os03g0367150	0.0443068		Os11g0705200	Os08g0448000	0.0401337		Os01g0826400	Os10g0572300	0.0503472
	Os04g0590400	Os12g0128600	0.0442864		Os05g0322900	Os08g0448000	0.0390291		Os05g0442700	Os10g0572300	0.0475355
	Os11g0705200	Os12g0128600	0.0404807		Os01g0625300	Os10g0490100	0.0451833		Os01g0975300	Os06g0621800	0.050338
	Os08g0249000	Os02g0617300	0.0442761		Os06g0649000	Os10g0490100	0.0441409		Os08g0485700	Os06g0621800	0.0471304
	Os04g0590400	Os09g0524500	0.0442545		Os08g0386200	Os10g0490100	0.0422717		Os08g0159500	Os01g0274100	0.0503303
	Os01g0140700	Os09g0524500	0.0415592		Os05g0322900	Os10g0490100	0.0394348		Os04g0541700	Os01g0561600	0.0503287
	Os08g0504000	Os09g0524500	0.040051		Os02g0181300	Os01g0796000	0.0451334		Os02g0564700	Os01g0701700	0.0502617
	Os10g0560700	Os09g0516800	0.0442534		Os03g0764100	Os01g0796000	0.0417515		Os02g0603600	Os01g0701700	0.0462933
	Os09g0431900	Os09g0516800	0.037969		Os04g0515900	Os04g0630800	0.0451005		Os07g0225300	Os04g0339400	0.0502454
	Os08g0159500	Os06g0164500	0.0442502		Os09g0572000	Os04g0630800	0.0418877		Os01g0695900	Os04g0339400	0.0499658
	Os09g0431900	Os06g0164500	0.0421856		Os07g0680400	Os04g0630800	0.0405959		Os01g0218100	Os04g0339400	0.0477199
	Os04g0550200	Os06g0164500	0.0414065		Os03g0183000	Os04g0634700	0.0450516		Os01g0575200	Os04g0339400	0.0460171
	Os06g0284500	Os06g0164500	0.0389013		Os10g0562900	Os04g0634700	0.0440946		Os06g0703900	Os01g0944700	0.0502091
	Os01g0975300	Os03g0326200	0.044239		Os01g0140700	Os04g0370900	0.0448377		Os07g0688200	Os01g0944700	0.0484412
	Os03g0437200	Os03g0326200	0.0378257		Os01g0185900	Os04g0370900	0.0434145		Os09g0481700	Os01g0944700	0.0440813
	Os11g0705200	Os09g0332100	0.044238		Os07g0680400	Os04g0370900	0.0433193		Os05g0442700	Os12g0510500	0.050184
	Os06g0519400	Os09g0332100	0.0425269		Os09g0572000	Os04g0370900	0.0397209		Os05g0569300	Os12g0510500	0.0498383
	Os03g0821200	Os09g0332100	0.041348		Os01g0826400	Os04g0370900	0.0395161		Os08g0562300	Os12g0510500	0.0458595
	Os10g0536100	Os09g0332100	0.0395922		Os04g0515900	Os04g0370900	0.038703		Os05g0553400	Os09g0255400	0.0501133
	Os01g0140700	Os09g0332100	0.0390659		Os06g0649000	Os04g0370900	0.0382365		Os01g0975300	Os09g0255400	0.0500231
	Os08g0159500	Os12g0628100	0.0442319		Os02g0181300	Os03g0150600	0.0447257		Os01g0196300	Os09g0255400	0.0491954
	Os08g0537900	Os12g0628100	0.0404756		Os01g0826400	Os03g0150600	0.0387442		Os01g0816100	Os09g0255400	0.0453728
	Os05g0195700	Os12g0628100	0.0378537		Os03g0198600	Os02g0712700	0.0446847		Os07g0680400	Os09g0255400	0.043897
	Os04g0493000	Os12g0516200	0.0442295		Os03g0437200	Os02g0712700	0.0421435		Os04g0590400	Os10g0559200	0.0501063
	Os08g0159500	Os12g0516200	0.040913		Os09g0572000	Os02g0712700	0.0416408		Os08g0485700	Os10g0559200	0.0455289
	Os02g0233200	Os12g0516200	0.0394892		Os02g0181300	Os02g0712700	0.0380892		Os01g0575200	Os10g0559200	0.0446747
	Os01g0826400	Os02g0242900	0.0442275		Os04g0590400	Os11g0214400	0.0445574		Os04g0590400	Os06g0295900	0.0500914
	Os10g0562900	Os02g0242900	0.0441757		Os02g0603600	Os11g0214400	0.0403058		Os03g0657400	Os06g0295900	0.0481975
	Os05g0195700	Os02g0242900	0.0403875		Os09g0434500	Os05g0380300	0.0444918		Os01g0246700	Os05g0548900	0.0500407
	Os09g0431900	Os11g0449600	0.0442224		Os04g0590400	Os05g0380300	0.0421465		Os06g0166400	Os05g0548900	0.043051
	Os08g0174500	Os11g0449600	0.0390994		Os10g0376900	Os05g0380300	0.0407022		Os09g0287000	Os04g0496150	0.05003
	Os09g0286600	Os09g0350900	0.0442128		Os10g0536100	Os05g0380300	0.0390617		Os12g0515500	Os04g0496150	0.0471463
	Os04g0557800	Os09g0350900	0.0433321		Os06g0649000	Os04g0128700	0.044472		Os09g0286600	Os04g0496150	0.0464666
	Os10g0536100	Os09g0350900	0.0414774		Os01g0575200	Os04g0128700	0.0419506		Os04g0541700	Os04g0496150	0.0462197
	Os08g0442400	Os09g0350900	0.0413719		Os01g0298400	Os04g0128700	0.0400171		Os04g0489600	Os11g0604900	0.0500082
	Os10g0376900	Os09g0350900	0.0376562		Os03g0198600	Os04g0128700	0.0394369		Os09g0572000	Os11g0604900	0.0430558
	Os07g0688200	Os05g0155200	0.0442083		Os05g0322900	Os04g0128700	0.0389928		Os05g0442700	Os09g0541000	0.0500021
	Os05g0537100	Os10g0490100	0.044199		Os01g0185900	Os09g0356800	0.0444626		Os08g0485700	Os09g0541000	0.0458629
	Os06g0649000	Os10g0490100	0.0437611		Os01g0192300	Os09g0356800	0.0414956		Os01g0975300	Os09g0541000	0.044712
	Os09g0572000	Os07g0674100	0.0441869		Os01g0140700	Os08g0203400	0.0444479		Os05g0442700	Os10g0148400	0.0499876
	Os04g0489600	Os07g0674100	0.0385015		Os01g0575200	Os08g0203400	0.0434232		Os03g0183200	Os07g0241700	0.0499748
	Os01g0292900	Os07g0674100	0.0379255		Os01g0826400	Os08g0203400	0.0425486		Os02g0564700	Os07g0241700	0.0449689
	Os03g0609500	Os02g0103600	0.0441823		Os07g0680400	Os08g0203400	0.0421859		Os04g0489600	Os08g0378000	0.0499463
	Os03g0820300	Os02g0103600	0.0387308		Os01g0185900	Os08g0203400	0.0410218		Os02g0603600	Os08g0378000	0.0459348
	Os06g0284500	Os03g0293100	0.0441633		Os04g0515900	Os08g0203400	0.0399343		Os02g0132500	Os08g0378000	0.0453387
	Os09g0431900	Os03g0293100	0.038725		Os09g0417600	Os07g0106200	0.0444131		Os07g0617000	Os08g0378000	0.0439066
	Os10g0490400	Os02g0445200	0.0441543		Os01g0185900	Os07g0106200	0.0422734		Os10g0376900	Os04g0363700	0.0498557
	Os04g0493000	Os02g0445200	0.0392632		Os07g0680400	Os07g0106200	0.0408984		Os01g0975300	Os04g0363700	0.0476368
	Os10g0536100	Os06g0181566	0.0441528		Os09g0287000	Os06g0129100	0.0444111		Os06g0728700	Os04g0295400	0.0498285
	Os03g0657400	Os06g0181566	0.0438127		Os09g0434500	Os06g0129100	0.0391109		Os08g0159500	Os04g0439300	0.0498194
	Os04g0590400	Os06g0181566	0.0411438		Os10g0536100	Os06g0129100	0.0381342		Os08g0436700	Os07g0509800	0.0497871
	Os01g0975300	Os02g0228600	0.0441418		Os03g0657400	Os06g0129100	0.0379469		Os01g0625300	Os07g0509800	0.0448562
	Os01g0192300	Os01g0116400	0.0441154		Os05g0525900	Os05g0150733	0.0444054		Os04g0546800	Os09g0115900	0.0497551
	Os03g0711100	Os01g0116400	0.0414931		Os03g0183000	Os05g0150733	0.0422963		Os03g0815100	Os09g0115900	0.0428022
	Os03g0231950	Os01g0116400	0.0376635		Os09g0572000	Os05g0150733	0.0400055		Os08g0159500	Os04g0684900	0.0496802
	Os05g0426200	Os09g0353200	0.0441112		Os06g0649000	Os01g0687400	0.0442068		Os01g0246700	Os04g0464100	0.049601
	Os08g0442400	Os09g0459450	0.0441073		Os07g0680400	Os01g0687400	0.0420727		Os06g0728700	Os05g0394900	0.0495983
	Os04g0590400	Os01g0905500	0.044077		Os09g0410700	Os01g0122000	0.0441632		Os01g0935000	Os05g0394900	0.0445374
	Os08g0537900	Os01g0905500	0.0390994		Os01g0140700	Os01g0122000	0.0403967		Os05g0195700	Os05g0394900	0.0431941
	Os10g0536100	Os01g0905500	0.0382414		Os01g0298400	Os08g0507701	0.044094		Os03g0815100	Os08g0356800	0.0495522
	Os05g0572000	Os01g0750900	0.0440707		Os01g0816100	Os08g0507701	0.0416752		Os07g0225300	Os08g0356800	0.0428273
	Os02g0732600	Os01g0750900	0.0384494		Os09g0287000	Os08g0507701	0.0396088		Os02g0187700	Os10g0165300	0.0495495
	Os05g0536250	Os01g0561600	0.0440553		Os03g0183000	Os08g0507701	0.0381561		Os02g0654700	Os12g0637800	0.0495412
	Os08g0357300	Os01g0561600	0.0409767		Os09g0287000	Os06g0129900	0.0440885		Os05g0343400	Os12g0637800	0.0475475
	Os01g0192300	Os08g0109400	0.0440424		Os12g0515500	Os06g0129900	0.0438611		Os08g0485700	Os12g0637800	0.0456192
	Os01g0246700	Os02g0314600	0.0440286		Os09g0410700	Os04g0469000	0.0440553		Os07g0617000	Os01g0947700	0.0494866
	Os01g0575200	Os02g0314600	0.0395111		Os03g0437200	Os04g0469000	0.0439726		Os02g0603600	Os01g0947700	0.0480037
	Os06g0519400	Os01g0546800	0.0439636		Os01g0575200	Os04g0469000	0.0423094		Os04g0557800	Os01g0947700	0.0470484
	Os08g0504000	Os06g0644200	0.0439426		Os01g0826400	Os04g0469000	0.038455		Os10g0376900	Os01g0947700	0.045154
	Os06g0663500	Os06g0644200	0.0408417		Os09g0572000	Os03g0801900	0.0440356		Os09g0434500	Os01g0947700	0.0430492
	Os03g0720800	Os06g0644200	0.0407749		Os06g0649000	Os09g0431100	0.0439984		Os11g0603000	Os01g0947700	0.0428285
	Os08g0537900	Os06g0644200	0.0386885		Os09g0410700	Os09g0431100	0.0398058		Os08g0485700	Os01g0302000	0.0494236
	Os03g0135700	Os06g0644200	0.0374106		Os05g0553400	Os09g0431100	0.0381759		Os10g0376900	Os01g0302000	0.0467281
	Os07g0688200	Os01g0597800	0.0439363		Os06g0649000	Os05g0370700	0.0439227		Os04g0489600	Os06g0698785	0.0493811
	Os01g0816100	Os01g0597800	0.0425322		Os09g0410700	Os01g0138400	0.0438983		Os01g0826400	Os06g0180666	0.049377
	Os05g0322900	Os01g0597800	0.0412227		Os09g0572000	Os07g0416700	0.0438818		Os06g0649000	Os06g0218300	0.0493576
	Os09g0572000	Os01g0597800	0.039292		Os03g0764100	Os07g0416700	0.039821		Os06g0703900	Os06g0218300	0.0450434
	Os11g0705200	Os01g0597800	0.0373571		Os01g0575200	Os07g0416700	0.0381002		Os02g0654700	Os06g0218300	0.042239
	Os02g0233200	Os05g0144900	0.0439241		Os01g0816100	Os07g0416700	0.0378135		Os06g0703900	Os09g0478300	0.0493287
	Os03g0198600	Os05g0144900	0.0396877		Os01g0575200	Os01g0648000	0.0438387		Os05g0488600	Os09g0397300	0.0493267
	Os02g0732600	Os02g0114900	0.0439067		Os06g0649000	Os01g0648000	0.0397104		Os06g0728700	Os09g0397300	0.0489581
	Os04g0550200	Os01g0585300	0.0438959		Os01g0826400	Os01g0648000	0.0388954		Os10g0562900	Os02g0827900	0.0493076
	Os10g0560700	Os01g0585300	0.039547		Os10g0376900	Os09g0438100	0.0438277		Os02g0603600	Os02g0827900	0.0462014
	Os06g0284500	Os01g0585300	0.038829		Os05g0525900	Os04g0173300	0.0438269		Os09g0434500	Os01g0627400	0.0492946
	Os08g0537900	Os03g0385400	0.0438577		Os09g0410700	Os09g0520500	0.0437804		Os04g0590400	Os01g0627400	0.0465635
	Os03g0657400	Os03g0385400	0.0396767		Os04g0541700	Os09g0520500	0.0429368		Os04g0489600	Os01g0627400	0.0439549
	Os08g0504000	Os03g0385400	0.0392877		Os01g0218100	Os09g0520500	0.0411404		Os03g0657400	Os01g0627400	0.0432012
	Os11g0705200	Os03g0385400	0.0376174		Os01g0575200	Os09g0520500	0.0410683		Os02g0564700	Os01g0627400	0.0424571
	Os06g0284500	Os10g0165400	0.0438086		Os10g0376900	Os05g0375400	0.0437177		Os03g0657400	Os04g0565400	0.0492834
	Os08g0174500	Os10g0165400	0.0427221		Os02g0132500	Os05g0375400	0.0430729		Os09g0434500	Os04g0565400	0.045988
	Os03g0657400	Os11g0274700	0.0438002		Os02g0603600	Os05g0142100	0.0436887		Os04g0489600	Os04g0565400	0.0440772
	Os01g0292900	Os11g0274700	0.0400323		Os12g0105600	Os05g0142100	0.0429091		Os02g0603600	Os04g0565400	0.0427835
	Os07g0680400	Os11g0274700	0.0397535		Os08g0416000	Os05g0142100	0.0413382		Os05g0569300	Os03g0817200	0.0492268
	Os01g0975300	Os11g0225000	0.0437754		Os10g0536100	Os05g0142100	0.0390745		Os01g0246700	Os03g0817200	0.0444447
	Os01g0292900	Os11g0225000	0.0407081		Os01g0816100	Os05g0550800	0.0434876		Os09g0334500	Os03g0817200	0.0426997
	Os04g0557800	Os10g0181100	0.0437631		Os02g0181300	Os05g0550800	0.0414471		Os01g0867300	Os03g0817200	0.0424977
	Os05g0426200	Os10g0181100	0.0432256		Os06g0649000	Os05g0550800	0.0405504		Os09g0572000	Os02g0472566	0.0491965
	Os07g0617000	Os10g0181100	0.0427842		Os01g0298400	Os05g0550800	0.0387979		Os09g0334500	Os08g0118000	0.0491738
	Os01g0292900	Os01g0681600	0.0437566		Os05g0553400	Os05g0550800	0.038742		Os01g0584900	Os08g0118000	0.0457172
	Os04g0557800	Os01g0681600	0.0425143		Os05g0343400	Os05g0550800	0.0385109		Os07g0158500	Os08g0118000	0.0432849
	Os01g0826400	Os01g0681600	0.0381248		Os02g0654700	Os05g0550800	0.0375934		Os01g0975300	Os10g0456000	0.04912
	Os09g0481700	Os01g0681600	0.0374894		Os09g0572000	Os03g0772600	0.0434864		Os05g0442700	Os10g0456000	0.0461642
	Os10g0560700	Os01g0818300	0.0437185		Os01g0826400	Os03g0772600	0.0382772		Os09g0334500	Os01g0824800	0.0491105
	Os05g0426200	Os01g0818300	0.0418237		Os11g0705200	Os03g0772600	0.0370236		Os02g0181300	Os01g0824800	0.0421718
	Os04g0550200	Os01g0818300	0.0407548		Os12g0515500	Os01g0681800	0.0434792		Os02g0221100	Os03g0277600	0.0491002
	Os04g0590400	Os01g0818300	0.0394486		Os09g0286600	Os01g0681800	0.0393389		Os07g0680400	Os03g0277600	0.0474798
	Os04g0493000	Os01g0252600	0.0437143		Os09g0572000	Os12g0556500	0.0434232		Os01g0246700	Os01g0556700	0.049053
	Os10g0490400	Os01g0252600	0.0428382		Os01g0826400	Os12g0556500	0.0405255		Os06g0166400	Os01g0556700	0.048363
	Os02g0285900	Os04g0165700	0.0437117		Os10g0562900	Os12g0556500	0.0388722		Os02g0181300	Os01g0556700	0.0419901
	Os04g0493000	Os04g0165700	0.041623		Os07g0225300	Os07g0691300	0.0433752		Os09g0334500	Os01g0719100	0.048973
	Os08g0537900	Os04g0165700	0.041138		Os05g0343400	Os07g0691300	0.0416407		Os06g0166400	Os01g0719100	0.0464519
	Os03g0711100	Os04g0165700	0.0399189		Os03g0183000	Os07g0538400	0.0433062		Os02g0132500	Os01g0947800	0.0488927
	Os10g0376900	Os01g0221100	0.0437115		Os01g0826400	Os07g0538400	0.0410722		Os09g0434500	Os01g0947800	0.045026
	Os11g0707300	Os01g0221100	0.0400707		Os09g0572000	Os07g0538400	0.0399059		Os03g0183000	Os10g0580400	0.0488917
	Os08g0159500	Os01g0221100	0.0398971		Os01g0575200	Os07g0538400	0.0389325		Os05g0343400	Os10g0580400	0.0447713
	Os02g0149900	Os01g0221100	0.0377764		Os05g0553400	Os07g0538400	0.0383597		Os01g0935000	Os09g0343400	0.0488875
	Os01g0935000	Os05g0135400	0.043696		Os06g0649000	Os07g0538400	0.0371362		Os12g0515500	Os08g0297800	0.0488186
	Os03g0657400	Os03g0268600	0.0436942		Os04g0541700	Os09g0272200	0.0432904		Os02g0638650	Os08g0297800	0.0487961
	Os11g0705200	Os03g0268600	0.0422422		Os06g0662200	Os09g0272200	0.0390464		Os04g0540200	Os08g0297800	0.0429843
	Os06g0663500	Os03g0268600	0.0421463		Os11g0175700	Os09g0272200	0.0383542		Os01g0511000	Os08g0297800	0.0415096
	Os08g0537900	Os03g0268600	0.0415521		Os02g0654700	Os08g0526400	0.0432442		Os05g0569300	Os04g0486950	0.0488161
	Os01g0575200	Os03g0268600	0.041405		Os02g0181300	Os08g0526400	0.0429524		Os05g0183100	Os02g0228300	0.0488122
	Os03g0821200	Os03g0268600	0.037191		Os05g0343400	Os08g0526400	0.0424011		Os08g0386200	Os02g0228300	0.0467253
	Os05g0572000	Os06g0690600	0.0436453		Os01g0575200	Os08g0526400	0.0387915		Os08g0159500	Os09g0412700	0.0487721
	Os10g0551200	Os06g0690600	0.0420401		Os03g0437200	Os08g0526400	0.0381048		Os03g0764900	Os09g0412700	0.0466901
	Os09g0431900	Os06g0690600	0.0410366		Os10g0376900	Os09g0353200	0.0432098		Os05g0195700	Os09g0412700	0.0465
	Os01g0292900	Os11g0251400	0.0436425		Os02g0603600	Os09g0353200	0.0423453		Os08g0159500	Os08g0236800	0.0487713
	Os09g0431900	Os01g0966200	0.0436262		Os09g0434500	Os09g0353200	0.0400372		Os06g0728700	Os08g0236800	0.0480549
	Os04g0550200	Os01g0966200	0.0389168		Os06g0649000	Os01g0912850	0.0431452		Os01g0140700	Os08g0236800	0.0440078
	Os02g0178100	Os01g0966200	0.0377202		Os07g0683200	Os01g0912850	0.0396434		Os05g0195700	Os08g0236800	0.0437332
	Os01g0292900	Os01g0302000	0.043594		Os01g0625300	Os01g0912850	0.0376957		Os07g0680400	Os05g0507300	0.0487445
	Os02g0603600	Os08g0378000	0.0435839		Os04g0515900	Os11g0626700	0.0430952		Os08g0562300	Os05g0507300	0.0460178
	Os10g0536100	Os08g0378000	0.0379082		Os06g0649000	Os11g0626700	0.0385052		Os03g0657400	Os09g0535900	0.0487438
	Os04g0590400	Os05g0565000	0.0435348		Os01g0140700	Os11g0626700	0.0382417		Os04g0489600	Os09g0535900	0.048285
	Os01g0575200	Os05g0565000	0.0430883		Os09g0572000	Os11g0626700	0.0382188		Os08g0159500	Os09g0535900	0.0480847
	Os10g0536100	Os05g0565000	0.0399362		Os06g0649000	Os07g0538200	0.043067		Os01g0140700	Os09g0535900	0.0461868
	Os10g0562100	Os09g0537700	0.0435008		Os05g0195700	Os07g0538200	0.0418079		Os04g0590400	Os09g0535900	0.0457853
	Os03g0182800	Os09g0537700	0.0385766		Os01g0511000	Os07g0538200	0.0368077		Os08g0485700	Os09g0535900	0.0444214
	Os09g0481700	Os04g0391500	0.0434763		Os09g0286600	Os02g0582900	0.0430655		Os01g0575200	Os09g0535900	0.042021
	Os08g0357300	Os04g0391500	0.0405329		Os03g0657400	Os02g0582900	0.0423798		Os10g0376900	Os03g0790700	0.0487375
	Os03g0437200	Os04g0417600	0.0434704		Os04g0489600	Os11g0567600	0.0430168		Os09g0434500	Os03g0790700	0.042797
	Os01g0575200	Os04g0417600	0.0399766		Os02g0603600	Os11g0567600	0.0378713		Os08g0485700	Os01g0209200	0.0487174
	Os01g0246700	Os04g0417600	0.0387305		Os01g0141000	Os11g0567600	0.0370514		Os02g0149900	Os08g0171700	0.0487121
	Os02g0181300	Os04g0417600	0.0372628		Os09g0410700	Os10g0416500	0.0429143		Os02g0221100	Os08g0171700	0.0429124
	Os04g0590400	Os01g0580500	0.0434441		Os01g0185900	Os10g0416500	0.0374285		Os05g0426200	Os08g0171700	0.0422449
	Os10g0536100	Os01g0580500	0.0392773		Os09g0410700	Os05g0116100	0.0428831		Os02g0149900	Os12g0186600	0.0486581
	Os10g0376900	Os01g0580500	0.0384977		Os09g0509700	Os05g0116100	0.0367265		Os05g0442700	Os12g0186600	0.0474624
	Os05g0426200	Os02g0632800	0.0434197		Os05g0343400	Os01g0243100	0.0428697		Os09g0572000	Os11g0109500	0.0486337
	Os02g0649300	Os08g0394000	0.0434		Os03g0764100	Os01g0243100	0.0419818		Os05g0426200	Os11g0109500	0.0457347
	Os04g0493000	Os08g0394000	0.0429133		Os01g0298400	Os01g0243100	0.0418806		Os01g0140700	Os11g0109500	0.0418353
	Os01g0935000	Os08g0394000	0.0414044		Os06g0649000	Os01g0670100	0.0426619		Os10g0376900	Os11g0644600	0.0486323
	Os05g0572000	Os08g0394000	0.037921		Os10g0562900	Os01g0670100	0.0419648		Os08g0159500	Os11g0644600	0.0435012
	Os12g0586300	Os11g0260100	0.0433735		Os05g0195700	Os01g0670100	0.0412		Os01g0975300	Os06g0158000	0.0486135
	Os05g0322900	Os11g0260100	0.0399104		Os01g0826400	Os01g0670100	0.0410495		Os07g0680400	Os06g0158000	0.0483364
	Os07g0680400	Os11g0260100	0.0396396		Os03g0183000	Os01g0670100	0.0409067		Os02g0221100	Os06g0158000	0.0470027
	Os09g0417600	Os11g0260100	0.0370167		Os01g0511000	Os01g0670100	0.036555		Os05g0553400	Os06g0158000	0.0420871
	Os01g0292900	Os04g0623200	0.0433642		Os05g0553400	Os01g0677900	0.0426419		Os05g0343400	Os01g0623500	0.0486111
	Os09g0481700	Os04g0623200	0.0402805		Os03g0764100	Os01g0677900	0.0395336		Os01g0246700	Os01g0623500	0.0484325
	Os08g0174500	Os04g0623200	0.0379113		Os06g0649000	Os01g0677900	0.0389116		Os11g0684000	Os01g0623500	0.0476052
	Os01g0935000	Os05g0261700	0.04336		Os01g0575200	Os01g0677900	0.0378963		Os08g0442400	Os10g0552600	0.0485914
	Os03g0657400	Os05g0261700	0.038033		Os10g0562900	Os09g0347300	0.0425889		Os02g0654700	Os01g0175100	0.0485811
	Os05g0579600	Os05g0582350	0.0433521		Os01g0714800	Os09g0347300	0.0423507		Os09g0334500	Os01g0175100	0.048082
	Os03g0164300	Os05g0582350	0.042663		Os03g0657400	Os09g0347300	0.0382112		Os02g0181300	Os01g0175100	0.0434832
	Os01g0575200	Os08g0480000	0.043345		Os11g0705200	Os01g0742400	0.0425693		Os01g0141000	Os03g0348200	0.0485114
	Os02g0285900	Os08g0480000	0.040483		Os02g0181300	Os01g0742400	0.0405074		Os03g0183000	Os03g0348200	0.0472817
	Os03g0183000	Os05g0161500	0.0433207		Os01g0575200	Os01g0742400	0.0402505		Os05g0426200	Os04g0524600	0.0484955
	Os01g0928000	Os05g0161500	0.037897		Os03g0437200	Os01g0742400	0.0393917		Os12g0515500	Os11g0459600	0.0484291
	Os07g0680400	Os05g0278500	0.043309		Os01g0826400	Os01g0742400	0.0376591		Os04g0541700	Os11g0459600	0.0446294
	Os01g0975300	Os06g0110000	0.0433052		Os04g0517100	Os01g0742400	0.0366912		Os03g0764900	Os11g0459600	0.043999
	Os03g0437200	Os06g0110000	0.037745		Os10g0562900	Os05g0576500	0.0424241		Os04g0569100	Os11g0459600	0.0418893
	Os01g0292900	Os06g0180666	0.0432826		Os09g0572000	Os05g0576500	0.0409499		Os02g0638650	Os09g0472900	0.0484208
	Os09g0481700	Os06g0180666	0.0385612		Os06g0649000	Os05g0576500	0.0364821		Os04g0590400	Os07g0529600	0.0484194
	Os01g0246700	Os06g0180666	0.0378953		Os11g0705200	Os01g0134700	0.0424224		Os08g0485700	Os07g0529600	0.0456215
	Os03g0198600	Os12g0432600	0.0432624		Os09g0410700	Os01g0134700	0.0415054		Os03g0657400	Os07g0529600	0.0431806
	Os01g0928000	Os01g0566800	0.0432237		Os04g0517100	Os01g0134700	0.0389782		Os01g0575200	Os07g0529600	0.0417264
	Os05g0572000	Os01g0566800	0.0420851		Os02g0654700	Os01g0134700	0.0376938		Os08g0159500	Os01g0934400	0.0484087
	Os02g0132500	Os01g0566800	0.0412673		Os06g0649000	Os01g0134700	0.0376844		Os05g0183100	Os12g0630100	0.0483763
	Os06g0649000	Os02g0669366	0.0432094		Os03g0437200	Os01g0134700	0.036284		Os08g0485700	Os12g0630100	0.0458406
	Os07g0688200	Os02g0669366	0.0414641		Os03g0183000	Os06g0218900	0.0424163		Os09g0334500	Os12g0630100	0.0439388
	Os01g0935000	Os03g0717900	0.0432041		Os10g0562900	Os06g0218900	0.0397995		Os03g0815100	Os09g0128400	0.0483435
	Os08g0174500	Os03g0717900	0.0393373		Os01g0816100	Os06g0218900	0.0390991		Os01g0584900	Os06g0524400	0.048299
	Os05g0553400	Os09g0246300	0.0431915		Os01g0141000	Os06g0218900	0.038368		Os04g0546800	Os06g0107100	0.0482851
	Os03g0437200	Os09g0246300	0.042786		Os03g0183000	Os07g0587500	0.0423889		Os05g0525900	Os06g0107100	0.0469504
	Os11g0705200	Os09g0246300	0.038358		Os03g0764100	Os07g0587500	0.0392171		Os07g0680400	Os06g0107100	0.0460137
	Os07g0680400	Os11g0475000	0.0431881		Os02g0654700	Os07g0587500	0.03734		Os05g0343400	Os01g0741900	0.0482845
	Os10g0551200	Os07g0572900	0.0431833		Os09g0287000	Os06g0694200	0.0423657		Os01g0246700	Os01g0741900	0.0462987
	Os06g0284500	Os07g0572900	0.0400304		Os05g0195700	Os06g0694200	0.0374324		Os06g0726300	Os08g0158400	0.048281
	Os09g0431900	Os07g0572900	0.0393895		Os07g0680400	Os06g0694200	0.0360507		Os01g0625300	Os08g0158400	0.0450057
	Os03g0711100	Os07g0572900	0.037803		Os07g0225300	Os04g0584600	0.0423628		Os05g0537100	Os08g0158400	0.0441141
	Os09g0287000	Os09g0343400	0.0431283		Os01g0826400	Os04g0584600	0.0390378		Os05g0183100	Os08g0158400	0.0434635
	Os12g0515500	Os06g0335975	0.0431231		Os02g0654700	Os04g0584600	0.0384666		Os05g0569300	Os11g0587600	0.0482662
	Os03g0231950	Os03g0422800	0.0431213		Os05g0343400	Os04g0584600	0.0374389		Os05g0569300	Os07g0568100	0.0482532
	Os04g0493000	Os03g0422800	0.0384592		Os05g0361700	Os01g0303800	0.0423604		Os06g0649000	Os04g0370900	0.0482409
	Os10g0490400	Os03g0422800	0.03742		Os06g0649000	Os11g0594000	0.0423515		Os07g0680400	Os04g0370900	0.0467332
	Os01g0292900	Os08g0269700	0.0431198		Os09g0334500	Os11g0594000	0.0367471		Os01g0575200	Os02g0823100	0.0482342
	Os07g0680400	Os03g0411800	0.0430814		Os05g0343400	Os06g0650900	0.0423454		Os04g0541700	Os02g0823100	0.0470832
	Os05g0537100	Os03g0411800	0.037797		Os03g0198600	Os02g0327500	0.0422314		Os01g0218100	Os02g0823100	0.046365
	Os04g0489600	Os11g0118300	0.0430807		Os09g0410700	Os02g0327500	0.0413286		Os02g0806300	Os02g0823100	0.0455264
	Os01g0928000	Os11g0118300	0.0366982		Os01g0826400	Os02g0327500	0.0403601		Os01g0140700	Os02g0823100	0.0438572
	Os10g0551200	Os12g0257450	0.0430787		Os02g0654700	Os02g0327500	0.0402511		Os12g0515500	Os02g0121500	0.0482167
	Os01g0192300	Os12g0257450	0.0399734		Os04g0517100	Os02g0327500	0.040088		Os05g0488600	Os02g0121500	0.04219
	Os03g0711100	Os12g0257450	0.0373013		Os03g0437200	Os02g0327500	0.0387807		Os09g0286600	Os02g0121500	0.0418287
	Os03g0609500	Os12g0257450	0.0368746		Os11g0705200	Os02g0327500	0.0377081		Os04g0557800	Os05g0579800	0.0481941
	Os02g0178100	Os12g0257450	0.0368184		Os06g0649000	Os02g0327500	0.03757		Os07g0688200	Os05g0579800	0.0436335
	Os09g0481700	Os03g0305200	0.0430577		Os01g0575200	Os02g0327500	0.0360783		Os08g0485700	Os05g0579800	0.0427923
	Os02g0174300	Os03g0161950	0.043042		Os10g0562900	Os06g0202300	0.0420498		Os04g0557800	Os01g0681600	0.0481807
	Os03g0327800	Os03g0161950	0.0399008		Os10g0562900	Os01g0830700	0.0419698		Os05g0569300	Os01g0681600	0.0475433
	Os10g0560700	Os03g0161950	0.0383945		Os08g0442400	Os09g0357400	0.0418924		Os05g0442700	Os01g0681600	0.0467614
	Os06g0728700	Os05g0517200	0.043021		Os02g0603600	Os12g0152100	0.0418713		Os09g0481700	Os01g0681600	0.0419929
	Os08g0537900	Os05g0517200	0.0423402		Os09g0334500	Os12g0152100	0.0401994		Os01g0246700	Os05g0522600	0.0481638
	Os05g0525900	Os05g0517200	0.0411905		Os07g0683200	Os12g0152100	0.0389513		Os11g0684000	Os05g0522600	0.0463466
	Os02g0654700	Os02g0126400	0.0430083		Os02g0181300	Os12g0152100	0.0374137		Os06g0649000	Os06g0288100	0.0481595
	Os04g0515900	Os02g0126400	0.0413347		Os01g0975300	Os12g0152100	0.0362801		Os01g0575200	Os06g0288100	0.0441633
	Os10g0376900	Os02g0326500	0.0429929		Os06g0649000	Os11g0669100	0.0418638		Os06g0703900	Os03g0289800	0.0481272
	Os04g0489600	Os02g0326500	0.0405212		Os04g0515900	Os11g0669100	0.038903		Os07g0683200	Os03g0289800	0.0457197
	Os02g0603600	Os02g0326500	0.0394278		Os01g0575200	Os11g0669100	0.0370325		Os01g0625300	Os03g0289800	0.0416012
	Os07g0617000	Os02g0326500	0.0389839		Os01g0185900	Os11g0669100	0.0362622		Os03g0183200	Os01g0695700	0.0480549
	Os04g0590400	Os02g0326500	0.038564		Os09g0410700	Os11g0669100	0.0362333		Os06g0703900	Os01g0695700	0.0433375
	Os02g0132500	Os02g0326500	0.037243		Os01g0575200	Os08g0457400	0.0416987		Os07g0158500	Os10g0469600	0.0480496
	Os08g0159500	Os01g0597600	0.0429928		Os09g0410700	Os08g0457400	0.039841		Os06g0703900	Os10g0469600	0.0471928
	Os02g0654700	Os01g0597600	0.039807		Os02g0654700	Os08g0457400	0.0374189		Os05g0442700	Os04g0442300	0.0480234
	Os04g0517100	Os01g0597600	0.0370641		Os01g0826400	Os08g0457400	0.0374188		Os01g0584900	Os04g0442300	0.0462748
	Os01g0575200	Os01g0597600	0.0368189		Os09g0334500	Os02g0532500	0.041597		Os07g0683200	Os04g0442300	0.044542
	Os05g0565900	Os06g0690200	0.0429879		Os09g0287000	Os02g0532500	0.0389967		Os05g0569300	Os04g0442300	0.0428095
	Os01g0292900	Os06g0690200	0.0378979		Os01g0185900	Os11g0156600	0.0415712		Os05g0444200	Os04g0442300	0.0415509
	Os02g0149900	Os02g0153300	0.0429758		Os07g0680400	Os11g0156600	0.039574		Os05g0442700	Os07g0543100	0.0479874
	Os12g0586300	Os02g0153300	0.0376477		Os01g0140700	Os11g0156600	0.0388801		Os01g0975300	Os07g0543100	0.0469023
	Os10g0562900	Os02g0211000	0.0429585		Os01g0575200	Os11g0156600	0.0384888		Os08g0159500	Os07g0543100	0.0441805
	Os01g0141000	Os02g0211000	0.041788		Os01g0826400	Os11g0156600	0.035742		Os09g0287000	Os08g0106000	0.0479705
	Os02g0603600	Os02g0211000	0.038584		Os05g0553400	Os11g0156600	0.0354048		Os09g0286600	Os08g0106000	0.0425143
	Os02g0233200	Os07g0178700	0.0429528		Os01g0196300	Os12g0138050	0.0415281		Os06g0649000	Os11g0625900	0.0479529
	Os01g0975300	Os07g0178700	0.0408057		Os12g0105600	Os12g0138050	0.0408671		Os03g0764900	Os03g0580200	0.0479485
	Os08g0537900	Os07g0178700	0.0393911		Os11g0705200	Os12g0138050	0.0380805		Os01g0935000	Os03g0580200	0.0470715
	Os05g0500600	Os11g0644500	0.0429411		Os05g0322900	Os12g0138050	0.0377641		Os08g0159500	Os03g0580200	0.0426102
	Os08g0174500	Os11g0644500	0.0376535		Os05g0183100	Os12g0138050	0.0374406		Os03g0183200	Os04g0682100	0.0479377
	Os08g0442400	Os02g0229900	0.0429407		Os03g0183000	Os01g0238500	0.0415273		Os09g0309700	Os04g0682100	0.0407882
	Os01g0935000	Os09g0557500	0.0429287		Os03g0183200	Os01g0238500	0.0391047		Os05g0569300	Os07g0532500	0.0479335
	Os04g0541700	Os09g0557500	0.0393249		Os07g0683200	Os01g0238500	0.0366057		Os05g0442700	Os07g0532500	0.0455212
	Os03g0609500	Os10g0471000	0.0429253		Os04g0546800	Os01g0238500	0.0360389		Os02g0806300	Os07g0532500	0.0447322
	Os03g0711100	Os10g0471000	0.0403657		Os09g0509700	Os03g0382100	0.0414652		Os02g0654700	Os02g0669366	0.0479186
	Os06g0663500	Os10g0471000	0.0387916		Os10g0536100	Os03g0382100	0.0411281		Os07g0688200	Os02g0669366	0.043128
	Os04g0590400	Os12g0568700	0.0429183		Os10g0376900	Os03g0382100	0.0361043		Os01g0975300	Os04g0585900	0.0478894
	Os06g0519400	Os12g0568700	0.0383719		Os01g0192300	Os03g0382100	0.0355575		Os08g0485700	Os04g0585900	0.0409986
	Os01g0185900	Os04g0111100	0.0429112		Os07g0680400	Os09g0355400	0.0414492		Os02g0564700	Os04g0432300	0.0478792
	Os05g0565900	Os04g0111100	0.0385237		Os01g0826400	Os09g0355400	0.0399243		Os02g0221100	Os04g0432300	0.0475214
	Os01g0292900	Os02g0819600	0.0428891		Os01g0185900	Os09g0355400	0.0390207		Os01g0575200	Os04g0432300	0.0466557
	Os05g0426200	Os02g0819600	0.0387381		Os01g0575200	Os09g0355400	0.0372995		Os01g0140700	Os04g0432300	0.0418195
	Os03g0657400	Os03g0659300	0.0428696		Os09g0572000	Os05g0542300	0.0414472		Os08g0485700	Os10g0430200	0.047868
	Os03g0720800	Os03g0659300	0.0404365		Os04g0489600	Os05g0542300	0.0397436		Os04g0489600	Os10g0430200	0.0464367
	Os02g0695200	Os03g0659300	0.0380162		Os09g0286600	Os05g0542300	0.0390608		Os04g0590400	Os10g0430200	0.0422175
	Os01g0928000	Os11g0559200	0.042865		Os09g0410700	Os05g0542300	0.0378067		Os09g0286600	Os07g0530700	0.0478288
	Os05g0572000	Os11g0559200	0.0369903		Os04g0590400	Os03g0729000	0.0413581		Os01g0140700	Os07g0530700	0.041718
	Os03g0135700	Os08g0267300	0.0428029		Os01g0140700	Os03g0729000	0.0382796		Os06g0166400	Os05g0186100	0.047782
	Os12g0592300	Os08g0267300	0.0385036		Os04g0489600	Os03g0729000	0.037219		Os06g0703900	Os07g0412100	0.0477788
	Os08g0249000	Os08g0267300	0.0375241		Os08g0546800	Os03g0729000	0.0371748		Os05g0444200	Os06g0493100	0.0477184
	Os03g0657400	Os03g0249700	0.0427841		Os01g0826400	Os11g0681400	0.0412166		Os05g0322900	Os06g0493100	0.0448164
	Os01g0140700	Os03g0249700	0.0398099		Os01g0185900	Os11g0681400	0.0381226		Os01g0196300	Os06g0493100	0.0436505
	Os10g0536100	Os03g0249700	0.0392055		Os04g0515900	Os11g0681400	0.0371469		Os04g0517100	Os06g0493100	0.0429826
	Os03g0135700	Os03g0249700	0.036762		Os09g0410700	Os11g0681400	0.0361478		Os02g0132500	Os09g0479500	0.047697
	Os04g0489600	Os01g0227700	0.042783		Os06g0649000	Os11g0681400	0.0352214		Os08g0436700	Os09g0479500	0.044808
	Os03g0231950	Os05g0332600	0.0427613		Os04g0515900	Os04g0476400	0.0412039		Os10g0562900	Os09g0447300	0.0476956
	Os10g0490400	Os05g0332600	0.0397647		Os01g0625300	Os04g0476400	0.0384232		Os05g0195700	Os09g0447300	0.0463653
	Os06g0703900	Os03g0310600	0.0427594		Os07g0617000	Os04g0476400	0.0370588		Os05g0537100	Os10g0537800	0.0476279
	Os09g0410700	Os03g0310600	0.0370953		Os05g0195700	Os01g0846400	0.041194		Os05g0183100	Os10g0537800	0.0406996
	Os02g0654700	Os03g0310600	0.0364787		Os02g0132500	Os01g0846400	0.0386858		Os02g0221100	Os02g0562600	0.0475975
	Os03g0821200	Os01g0772900	0.0427303		Os03g0183200	Os04g0682100	0.0408438		Os09g0309700	Os05g0542732	0.0475879
	Os08g0537900	Os01g0772900	0.0375145		Os04g0515900	Os04g0688300	0.0408321		Os02g0132500	Os05g0542732	0.045098
	Os01g0826400	Os04g0487400	0.042728		Os01g0140700	Os04g0688300	0.036609		Os02g0638650	Os04g0458600	0.0475653
	Os01g0575200	Os04g0487400	0.0380565		Os10g0536100	Os10g0501500	0.0407763		Os03g0183200	Os04g0458600	0.0419157
	Os02g0178100	Os10g0198300	0.0427029		Os04g0590400	Os04g0480200	0.0405723		Os09g0572000	Os11g0541600	0.0474628
	Os10g0560700	Os10g0198300	0.0388052		Os05g0195700	Os05g0468900	0.0405678		Os01g0826400	Os11g0541600	0.044835
	Os06g0284500	Os10g0198300	0.0382307		Os03g0860100	Os05g0468900	0.0365036		Os07g0680400	Os11g0541600	0.0447091
	Os02g0174300	Os10g0198300	0.0373195		Os02g0603600	Os10g0578800	0.0405231		Os05g0426200	Os11g0541600	0.0432345
	Os08g0249000	Os12g0155100	0.0426904		Os09g0481700	Os10g0578800	0.0353041		Os01g0575200	Os11g0541600	0.042048
	Os06g0284500	Os12g0155100	0.037657		Os09g0286600	Os07g0677100	0.0404526		Os05g0426200	Os09g0353200	0.0474355
	Os10g0560700	Os12g0155100	0.0375164		Os09g0287000	Os07g0677100	0.0392168		Os02g0181300	Os12g0432600	0.0473377
	Os03g0609500	Os12g0155100	0.0366012		Os04g0489600	Os08g0517200	0.0404323		Os03g0198600	Os12g0432600	0.042287
	Os04g0493000	Os12g0155100	0.0365696		Os02g0603600	Os08g0517200	0.0362229		Os07g0158500	Os07g0490100	0.0473145
	Os08g0174500	Os05g0493166	0.0426559		Os01g0975300	Os06g0335900	0.0404152		Os09g0334500	Os07g0490100	0.0443679
	Os04g0493000	Os01g0974200	0.0426429		Os12g0515500	Os06g0335900	0.0393848		Os07g0683200	Os07g0490100	0.0404438
	Os08g0159500	Os01g0974200	0.0409709		Os05g0553400	Os06g0335900	0.0388426		Os02g0654700	Os02g0327500	0.0473072
	Os06g0284500	Os04g0455700	0.0426396		Os11g0705200	Os06g0335900	0.0369349		Os03g0437200	Os02g0327500	0.0417297
	Os08g0159500	Os04g0455700	0.0423773		Os02g0706600	Os06g0335900	0.0362856		Os01g0826400	Os02g0807800	0.0472992
	Os05g0572000	Os04g0455700	0.040812		Os01g0826400	Os03g0660400	0.0403874		Os03g0764100	Os02g0807800	0.0430733
	Os08g0249000	Os04g0455700	0.0375262		Os04g0610400	Os03g0660400	0.0395337		Os06g0649000	Os02g0807800	0.0411157
	Os03g0711100	Os04g0455700	0.036351		Os09g0522200	Os03g0660400	0.037138		Os04g0517100	Os02g0807800	0.0406081
	Os04g0517100	Os01g0841700	0.0426097		Os06g0662200	Os12g0186600	0.0403789		Os03g0657400	Os03g0323600	0.047276
	Os03g0198600	Os01g0841700	0.0394181		Os07g0683200	Os12g0186600	0.0388865		Os04g0489600	Os03g0323600	0.0472385
	Os05g0474800	Os01g0841700	0.038576		Os02g0603600	Os02g0135200	0.0402146		Os04g0590400	Os03g0323600	0.0470217
	Os08g0386200	Os01g0841700	0.0382666		Os04g0590400	Os02g0135200	0.0399507		Os01g0140700	Os03g0323600	0.0406735
	Os05g0343400	Os01g0841700	0.0365432		Os10g0536100	Os02g0135200	0.0353485		Os01g0625300	Os01g0253500	0.0471878
	Os01g0192300	Os08g0174300	0.0425952		Os09g0434500	Os02g0135200	0.0343721		Os06g0649000	Os01g0253500	0.0464456
	Os08g0357300	Os04g0461400	0.0425541		Os01g0575200	Os06g0522300	0.0401227		Os05g0183100	Os01g0253500	0.0458324
	Os03g0711100	Os06g0132300	0.0425236		Os03g0183000	Os06g0522300	0.0397492		Os05g0322900	Os01g0253500	0.0420662
	Os02g0178100	Os06g0132300	0.0406925		Os01g0826400	Os06g0522300	0.0381433		Os09g0309700	Os12g0102700	0.0471785
	Os08g0159500	Os06g0132300	0.0381564		Os10g0562900	Os06g0522300	0.0368849		Os09g0286600	Os12g0102700	0.0420494
	Os05g0426200	Os11g0609500	0.0425011		Os06g0649000	Os06g0522300	0.0353402		Os05g0426200	Os08g0351300	0.047137
	Os10g0562900	Os11g0609500	0.0402749		Os09g0286600	Os09g0272000	0.0400554		Os07g0680400	Os08g0351300	0.0436564
	Os03g0183000	Os11g0609500	0.0381581		Os01g0575200	Os04g0635500	0.0400403		Os01g0511000	Os08g0351300	0.041936
	Os05g0553400	Os11g0609500	0.0376179		Os01g0140700	Os04g0635500	0.0342124		Os09g0572000	Os04g0556400	0.0471256
	Os03g0188400	Os12g0629700	0.0424933		Os04g0489600	Os01g0203400	0.0400252		Os05g0322900	Os04g0556400	0.0402751
	Os05g0572000	Os12g0629700	0.037696		Os09g0434500	Os01g0203400	0.0355806		Os01g0816100	Os04g0556400	0.0401633
	Os06g0703900	Os10g0469600	0.0424719		Os09g0334500	Os08g0409100	0.0399866		Os11g0684000	Os08g0127100	0.047121
	Os02g0181300	Os12g0159000	0.0424297		Os07g0683200	Os08g0409100	0.0373428		Os05g0183100	Os10g0395000	0.0471165
	Os08g0386200	Os12g0159000	0.0365566		Os01g0826400	Os12g0518200	0.0399771		Os01g0625300	Os10g0395000	0.0440989
	Os03g0657400	Os01g0229600	0.042429		Os01g0575200	Os12g0518200	0.0378117		Os06g0649000	Os10g0395000	0.0416657
	Os03g0720800	Os01g0229600	0.0401985		Os11g0705200	Os12g0518200	0.0377415		Os05g0322900	Os10g0395000	0.040636
	Os01g0292900	Os01g0229600	0.0394223		Os01g0140700	Os12g0518200	0.0374715		Os06g0726300	Os10g0395000	0.0402395
	Os06g0519400	Os01g0229600	0.0386895		Os09g0417600	Os12g0518200	0.0373973		Os10g0376900	Os05g0380300	0.0471015
	Os10g0536100	Os01g0229600	0.0372124		Os04g0517100	Os12g0518200	0.0347508		Os04g0590400	Os05g0380300	0.0456307
	Os04g0590400	Os01g0229600	0.0365079		Os05g0343400	Os12g0518200	0.0340706		Os09g0286600	Os05g0380300	0.0445606
	Os03g0133000	Os08g0457300	0.0424255		Os03g0437200	Os11g0250400	0.0399035		Os04g0541700	Os05g0380300	0.0416837
	Os05g0343400	Os08g0457300	0.0402891		Os09g0410700	Os05g0256500	0.0395845		Os03g0183000	Os10g0491450	0.0470876
	Os01g0246700	Os08g0457300	0.0401782		Os02g0654700	Os04g0619400	0.0395647		Os03g0183000	Os01g0136700	0.0470779
	Os01g0826400	Os04g0464100	0.0424142		Os04g0517100	Os04g0619400	0.0379352		Os10g0562900	Os11g0628000	0.0470779
	Os01g0246700	Os04g0464100	0.0420123		Os08g0386200	Os04g0619400	0.0372409		Os01g0511000	Os11g0628000	0.0445312
	Os03g0437200	Os04g0464100	0.0398156		Os06g0649000	Os04g0619400	0.0351568		Os06g0649000	Os11g0628000	0.0444973
	Os05g0343400	Os04g0464100	0.0365381		Os05g0343400	Os04g0619400	0.0345928		Os09g0572000	Os11g0628000	0.0407045
	Os01g0524500	Os01g0318202	0.0424109		Os01g0140700	Os05g0311500	0.0395262		Os01g0218100	Os09g0425200	0.0470536
	Os08g0159500	Os01g0318202	0.0404933		Os04g0541700	Os05g0311500	0.0343744		Os09g0309700	Os09g0425200	0.0464995
	Os03g0164300	Os01g0318202	0.0394552		Os05g0553400	Os05g0287800	0.0394526		Os01g0575200	Os09g0425200	0.0447045
	Os06g0728700	Os01g0318202	0.0393825		Os03g0764100	Os05g0287800	0.0367924		Os03g0657400	Os09g0425200	0.0424181
	Os05g0488600	Os01g0318202	0.0366673		Os05g0343400	Os05g0287800	0.0339022		Os07g0158500	Os05g0550000	0.0470245
	Os06g0519400	Os08g0444440	0.0424063		Os05g0195700	Os06g0652300	0.0394185		Os02g0181300	Os05g0550000	0.0456611
	Os02g0695200	Os08g0444440	0.0390739		Os05g0488600	Os08g0148267	0.0393849		Os01g0867300	Os05g0550000	0.0443737
	Os01g0575200	Os08g0444440	0.0382694		Os03g0437200	Os08g0148267	0.0383226		Os04g0557800	Os05g0550000	0.0425791
	Os01g0192300	Os08g0444440	0.0370621		Os03g0198600	Os08g0148267	0.0373002		Os04g0557800	Os10g0181100	0.0470242
	Os03g0135700	Os10g0198100	0.042392		Os05g0553400	Os08g0148267	0.0364022		Os05g0426200	Os10g0181100	0.0452482
	Os07g0178600	Os10g0198100	0.0414077		Os08g0416000	Os08g0148267	0.0359771		Os09g0434500	Os10g0181100	0.0443212
	Os06g0663500	Os10g0198100	0.0370831		Os09g0417600	Os03g0641250	0.0392471		Os10g0376900	Os10g0181100	0.0420617
	Os01g0292900	Os02g0773200	0.0423915		Os01g0816100	Os02g0134400	0.0392022		Os04g0489600	Os10g0181100	0.0419965
	Os07g0683200	Os01g0590300	0.0423852		Os03g0657400	Os02g0134400	0.0382194		Os08g0485700	Os02g0197200	0.0470018
	Os10g0490400	Os01g0590300	0.0420619		Os03g0183000	Os02g0134400	0.0379243		Os04g0590400	Os02g0197200	0.0460689
	Os07g0158500	Os01g0590300	0.0367711		Os10g0562900	Os02g0134400	0.0352758		Os03g0657400	Os02g0197200	0.0452079
	Os03g0711100	Os01g0679700	0.0423578		Os01g0141000	Os02g0134400	0.0347895		Os09g0434500	Os02g0197200	0.0445418
	Os10g0560700	Os01g0679700	0.037076		Os05g0195700	Os02g0134400	0.0340813		Os01g0575200	Os02g0197200	0.0431739
	Os08g0159500	Os02g0498600	0.0423133		Os10g0562900	Os01g0194300	0.0391583		Os01g0140700	Os02g0197200	0.0409982
	Os08g0174500	Os02g0498600	0.037185		Os10g0562900	Os12g0632800	0.0390656		Os04g0517100	Os05g0215300	0.0469791
	Os06g0284500	Os02g0498600	0.0365924		Os03g0183000	Os12g0632800	0.0351551		Os05g0195700	Os05g0215300	0.0449571
	Os02g0649300	Os02g0498600	0.0361257		Os01g0826400	Os12g0632800	0.0336282		Os06g0728700	Os05g0215300	0.0407452
	Os05g0572000	Os06g0204100	0.0423059		Os06g0649000	Os06g0557100	0.0390424		Os02g0149900	Os05g0215300	0.0400835
	Os09g0431900	Os06g0204100	0.0384851		Os09g0572000	Os06g0557100	0.0380578		Os04g0557800	Os11g0626700	0.0469661
	Os10g0551200	Os06g0204100	0.0375326		Os01g0826400	Os06g0557100	0.0352259		Os05g0426200	Os11g0626700	0.0439655
	Os08g0159500	Os02g0774100	0.0422982		Os01g0298400	Os06g0557100	0.0346523		Os01g0141000	Os10g0518300	0.046954
	Os08g0537900	Os02g0774100	0.0394187		Os01g0816100	Os06g0557100	0.0343691		Os07g0617000	Os10g0518300	0.0448578
	Os11g0707300	Os03g0699700	0.0422876		Os01g0575200	Os06g0557100	0.0341335		Os03g0657400	Os10g0518300	0.0435551
	Os02g0233200	Os03g0699700	0.0411078		Os09g0434500	Os09g0399800	0.0389456		Os01g0935000	Os10g0518300	0.0417613
	Os08g0537900	Os03g0699700	0.0390891		Os10g0536100	Os09g0399800	0.0369223		Os01g0140700	Os05g0278500	0.0469357
	Os10g0536100	Os12g0576700	0.0422625		Os10g0562900	Os09g0399800	0.0359771		Os05g0553400	Os05g0278500	0.0460523
	Os02g0603600	Os12g0576700	0.0390598		Os09g0572000	Os07g0540600	0.0389303		Os02g0221100	Os05g0278500	0.0460058
	Os04g0590400	Os12g0576700	0.0374357		Os01g0298400	Os07g0540600	0.0389048		Os07g0680400	Os05g0278500	0.0441368
	Os01g0192300	Os12g0576700	0.036654		Os01g0185900	Os05g0149400	0.0389298		Os05g0488600	Os08g0194350	0.0468838
	Os02g0603600	Os01g0178900	0.0422559		Os07g0680400	Os05g0149400	0.0371626		Os05g0195700	Os08g0194350	0.0439926
	Os07g0617000	Os01g0178900	0.0378822		Os01g0511000	Os05g0149400	0.0347698		Os06g0728700	Os08g0194350	0.0429291
	Os12g0612700	Os03g0284400	0.0422549		Os09g0572000	Os05g0149400	0.0334118		Os04g0540200	Os06g0726100	0.046866
	Os08g0159500	Os03g0284400	0.0383785		Os01g0816100	Os11g0618700	0.038925		Os11g0684000	Os06g0726100	0.0459112
	Os12g0586300	Os11g0149300	0.0422264		Os05g0343400	Os11g0618700	0.0381765		Os01g0584900	Os06g0726100	0.0402625
	Os04g0590400	Os11g0149300	0.040847		Os10g0562900	Os11g0618700	0.0377769		Os01g0141000	Os01g0870400	0.0468631
	Os03g0164300	Os05g0475700	0.0422064		Os03g0657400	Os11g0618700	0.0358773		Os10g0376900	Os08g0203150	0.0468435
	Os03g0711100	Os05g0475700	0.0362127		Os05g0488600	Os11g0526000	0.0388263		Os09g0434500	Os08g0203150	0.0464119
	Os02g0603600	Os09g0541100	0.0421993		Os12g0515500	Os11g0526000	0.0336914		Os04g0590400	Os08g0203150	0.0402176
	Os01g0141000	Os09g0541100	0.0371438		Os03g0764900	Os01g0931000	0.0387432		Os05g0569300	Os02g0689200	0.0468335
	Os09g0287000	Os05g0140300	0.0421986		Os12g0515500	Os01g0931000	0.0372203		Os01g0816100	Os02g0689200	0.0437198
	Os01g0511000	Os05g0140300	0.0385167		Os08g0442400	Os01g0931000	0.0365571		Os01g0975300	Os02g0689200	0.0422519
	Os08g0537900	Os11g0542100	0.042197		Os08g0546800	Os01g0931000	0.0344096		Os09g0287000	Os08g0539700	0.0468301
	Os06g0519400	Os11g0542100	0.0414157		Os04g0569100	Os01g0931000	0.0334878		Os09g0286600	Os08g0539700	0.0446593
	Os03g0183000	Os09g0447300	0.0421945		Os02g0603600	Os04g0688100	0.0386713		Os10g0376900	Os05g0496100	0.0468295
	Os01g0826400	Os09g0447300	0.0396334		Os01g0975300	Os05g0155200	0.0386496		Os04g0489600	Os05g0496100	0.0437021
	Os10g0562900	Os09g0447300	0.0386489		Os03g0437200	Os10g0348900	0.0386351		Os02g0187700	Os10g0555100	0.0468197
	Os01g0511000	Os09g0447300	0.0377638		Os02g0706600	Os10g0348900	0.0377102		Os03g0198600	Os10g0555100	0.0421161
	Os02g0732600	Os11g0241200	0.0421676		Os11g0705200	Os10g0348900	0.0354137		Os01g0826400	Os10g0555100	0.0399248
	Os09g0286600	Os01g0191200	0.0421544		Os01g0975300	Os10g0348900	0.033754		Os03g0164300	Os05g0111200	0.046812
	Os09g0410700	Os01g0191200	0.0380597		Os01g0192300	Os12g0133100	0.0386038		Os05g0579600	Os05g0111200	0.0407298
	Os01g0292900	Os07g0148900	0.0421521		Os09g0410700	Os12g0133100	0.0369738		Os08g0159500	Os05g0111200	0.0402533
	Os03g0720800	Os07g0148900	0.0386386		Os03g0657400	Os12g0133100	0.0342413		Os03g0198600	Os06g0304600	0.0468047
	Os03g0231950	Os07g0507500	0.042115		Os10g0562900	Os06g0224200	0.0385782		Os01g0196300	Os06g0304600	0.0444358
	Os03g0609500	Os07g0507500	0.0418677		Os09g0572000	Os06g0224200	0.0337382		Os06g0703900	Os03g0187800	0.046803
	Os01g0192300	Os07g0507500	0.0411605		Os02g0706600	Os10g0521000	0.0385733		Os05g0322900	Os04g0468600	0.0466956
	Os11g0175700	Os07g0507500	0.0359093		Os07g0680400	Os10g0521000	0.0337279		Os04g0517100	Os04g0468600	0.0401389
	Os08g0386200	Os01g0915900	0.0420925		Os01g0816100	Os02g0695800	0.0385726		Os07g0680400	Os04g0468600	0.0396917
	Os09g0417600	Os01g0915900	0.041534		Os01g0140700	Os02g0695800	0.0348176		Os02g0221100	Os03g0660500	0.0466533
	Os04g0517100	Os01g0915900	0.040329		Os01g0575200	Os04g0565500	0.0385565		Os03g0437200	Os10g0191300	0.0465858
	Os05g0322900	Os01g0915900	0.0395987		Os01g0826400	Os04g0565500	0.0337018		Os04g0517100	Os10g0191300	0.0435348
	Os03g0609500	Os11g0485500	0.0420697		Os03g0183000	Os04g0565500	0.0335347		Os05g0322900	Os10g0191300	0.0433428
	Os03g0711100	Os11g0485500	0.0372448		Os12g0515500	Os06g0558300	0.0385032		Os10g0376900	Os10g0191300	0.0406708
	Os04g0493000	Os11g0485500	0.0369135		Os09g0334500	Os06g0558300	0.0356274		Os01g0575200	Os04g0487400	0.0465631
	Os02g0649300	Os11g0485500	0.0365711		Os04g0546800	Os06g0558300	0.0341922		Os03g0183000	Os04g0487400	0.0460934
	Os01g0935000	Os11g0485500	0.0362208		Os04g0569100	Os11g0459600	0.0384223		Os05g0553400	Os04g0487400	0.0423425
	Os08g0249000	Os11g0485500	0.0358461		Os09g0286600	Os11g0459600	0.0383435		Os10g0562900	Os04g0487400	0.0407771
	Os02g0285900	Os11g0546300	0.0420589		Os08g0442400	Os11g0459600	0.0362557		Os05g0569300	Os05g0414200	0.0465534
	Os06g0728700	Os11g0546300	0.0365115		Os12g0515500	Os11g0459600	0.0339545		Os05g0442700	Os05g0414200	0.0464785
	Os04g0493000	Os03g0333400	0.0420271		Os04g0541700	Os11g0459600	0.0331892		Os01g0826400	Os05g0414200	0.0450048
	Os08g0159500	Os03g0333400	0.0401304		Os01g0298400	Os01g0268600	0.0383645		Os04g0557800	Os05g0414200	0.0447117
	Os03g0711100	Os03g0333400	0.037982		Os01g0975300	Os02g0563000	0.0382583		Os09g0481700	Os05g0414200	0.0427536
	Os04g0493000	Os09g0115400	0.042024		Os01g0826400	Os02g0763900	0.0380676		Os05g0426200	Os01g0940800	0.0465437
	Os06g0284500	Os09g0115400	0.0379056		Os01g0298400	Os02g0763900	0.0373396		Os07g0680400	Os01g0940800	0.0449001
	Os03g0711100	Os09g0115400	0.0357489		Os05g0343400	Os02g0763900	0.0346949		Os04g0515900	Os01g0940800	0.0414224
	Os05g0474800	Os02g0803600	0.042021		Os09g0287000	Os06g0655500	0.0380597		Os06g0649000	Os01g0940800	0.0404698
	Os08g0159500	Os02g0803600	0.0405936		Os02g0132500	Os06g0655500	0.0333441		Os01g0826400	Os01g0940800	0.0398787
	Os03g0764900	Os02g0803600	0.0402332		Os04g0489600	Os05g0177500	0.0379481		Os02g0564700	Os06g0688200	0.0465016
	Os08g0537900	Os02g0803600	0.0370952		Os01g0185900	Os05g0177500	0.0350398		Os09g0434500	Os06g0688200	0.046172
	Os06g0519400	Os01g0199700	0.0419978		Os10g0376900	Os05g0177500	0.0348925		Os06g0562300	Os06g0688200	0.0434984
	Os03g0720800	Os01g0199700	0.0374155		Os02g0638650	Os04g0542200	0.0379289		Os02g0823900	Os06g0688200	0.0431051
	Os01g0140700	Os01g0199700	0.037266		Os01g0826400	Os03g0225700	0.0379277		Os02g0132500	Os06g0688200	0.0400937
	Os05g0536250	Os09g0439800	0.0419624		Os01g0575200	Os03g0225700	0.036212		Os09g0309700	Os06g0688200	0.0398725
	Os07g0178600	Os09g0439800	0.0379913		Os02g0654700	Os03g0225700	0.0356275		Os06g0649000	Os03g0314500	0.0464827
	Os03g0764100	Os01g0925100	0.0419354		Os09g0410700	Os03g0225700	0.0352988		Os09g0572000	Os03g0314500	0.0460761
	Os05g0343400	Os01g0925100	0.0357961		Os09g0572000	Os03g0225700	0.0346427		Os01g0140700	Os03g0314500	0.0415513
	Os03g0609500	Os07g0639500	0.0418984		Os05g0553400	Os07g0631700	0.0379016		Os01g0511000	Os03g0314500	0.0413866
	Os05g0473300	Os07g0639500	0.0396007		Os01g0816100	Os07g0631700	0.0332335		Os02g0221100	Os04g0474700	0.0464517
	Os06g0663500	Os07g0639500	0.038258		Os04g0590400	Os09g0554300	0.0376012		Os07g0688200	Os04g0474700	0.0423285
	Os03g0820300	Os07g0639500	0.0367541		Os08g0416000	Os09g0554300	0.0348486		Os01g0975300	Os04g0474700	0.041428
	Os01g0935000	Os10g0539500	0.0418961		Os02g0603600	Os09g0554300	0.0324013		Os09g0434500	Os12g0576700	0.04641
	Os03g0711100	Os10g0539500	0.0375736		Os08g0546800	Os09g0554300	0.0323569		Os02g0603600	Os12g0576700	0.043985
	Os04g0590400	Os06g0725200	0.0418958		Os10g0376900	Os06g0114400	0.0376002		Os04g0557800	Os12g0576700	0.0428604
	Os07g0178600	Os06g0725200	0.0380685		Os06g0662200	Os06g0114400	0.0360406		Os09g0434500	Os06g0129100	0.0464096
	Os04g0489600	Os06g0725200	0.0380638		Os05g0195700	Os06g0114400	0.0339494		Os10g0376900	Os02g0744900	0.046368
	Os10g0376900	Os06g0725200	0.0380161		Os03g0764900	Os06g0114400	0.033377		Os05g0442700	Os02g0744900	0.0402146
	Os01g0935000	Os06g0725200	0.0373886		Os04g0541700	Os06g0114400	0.0330114		Os08g0416000	Os09g0545300	0.0463432
	Os11g0603000	Os06g0725200	0.0366257		Os04g0540200	Os01g0940000	0.037598		Os02g0132500	Os09g0545300	0.0429294
	Os07g0617000	Os06g0725200	0.035846		Os06g0649000	Os01g0940000	0.0349926		Os06g0703900	Os06g0202900	0.0463429
	Os01g0141000	Os01g0846300	0.0418869		Os02g0638650	Os01g0940000	0.0330334		Os01g0935000	Os01g0878000	0.0463324
	Os01g0935000	Os01g0846300	0.0411843		Os03g0183200	Os03g0238800	0.0374484		Os01g0218100	Os01g0878000	0.0461327
	Os01g0192300	Os09g0127300	0.0418752		Os02g0638650	Os07g0677200	0.0374277		Os05g0183100	Os06g0220800	0.0463057
	Os05g0572000	Os02g0549600	0.0418409		Os12g0515500	Os07g0661000	0.0373878		Os01g0196300	Os06g0220800	0.042948
	Os02g0285900	Os02g0549600	0.0418221		Os04g0489600	Os03g0232400	0.0373695		Os01g0584900	Os06g0220800	0.0418532
	Os01g0935000	Os02g0549600	0.0415531		Os05g0553400	Os03g0757000	0.0372487		Os08g0159500	Os09g0460300	0.0462856
	Os06g0284500	Os02g0549600	0.0367913		Os07g0680400	Os03g0757000	0.0343258		Os01g0935000	Os09g0460300	0.0432877
	Os04g0515900	Os11g0259700	0.0418402		Os01g0816100	Os03g0610400	0.0371827		Os10g0562900	Os08g0384500	0.046282
	Os06g0519400	Os02g0472566	0.0418294		Os01g0298400	Os03g0610400	0.0366018		Os05g0553400	Os08g0384500	0.0418961
	Os09g0410700	Os02g0472566	0.0375829		Os01g0141000	Os08g0465700	0.0371525		Os02g0221100	Os08g0384500	0.0412922
	Os01g0292900	Os06g0297800	0.0418176		Os02g0132500	Os08g0465700	0.0348458		Os03g0183000	Os08g0384500	0.0404589
	Os12g0586300	Os08g0192300	0.0417973		Os05g0195700	Os01g0138500	0.0370565		Os05g0553400	Os04g0524500	0.0462619
	Os03g0764900	Os08g0192300	0.0408355		Os10g0376900	Os05g0171900	0.0370465		Os02g0132500	Os04g0429600	0.0462476
	Os08g0159500	Os08g0192300	0.0397535		Os04g0489600	Os05g0171900	0.0364923		Os01g0140700	Os02g0599400	0.046243
	Os06g0284500	Os09g0341001	0.0417809		Os04g0590400	Os05g0171900	0.0359188		Os05g0195700	Os02g0599400	0.042628
	Os10g0560700	Os09g0341001	0.0392305		Os07g0617000	Os05g0171900	0.0344444		Os02g0149900	Os03g0782200	0.0462235
	Os03g0820300	Os09g0341001	0.0381839		Os01g0826400	Os11g0156300	0.0370347		Os01g0867300	Os03g0782200	0.0444223
	Os08g0249000	Os09g0341001	0.0356294		Os01g0575200	Os11g0156300	0.0360094		Os05g0569300	Os03g0782200	0.0433073
	Os07g0688200	Os06g0328400	0.0417755		Os05g0322900	Os11g0582100	0.0370298		Os05g0322900	Os09g0268800	0.0462184
	Os07g0683200	Os06g0328400	0.03782		Os08g0386200	Os11g0582100	0.0325616		Os01g0246700	Os02g0165100	0.0462136
	Os05g0343400	Os02g0822900	0.0417519		Os05g0553400	Os11g0582100	0.0316535		Os08g0159500	Os02g0165100	0.0448381
	Os03g0183000	Os02g0822900	0.0377314		Os07g0617000	Os04g0688600	0.0370199		Os05g0343400	Os02g0165100	0.0436113
	Os04g0590400	Os01g0123700	0.0417512		Os01g0140700	Os04g0117900	0.0369465		Os02g0187700	Os02g0165100	0.0392849
	Os02g0174300	Os01g0123700	0.040921		Os12g0515500	Os12g0638300	0.0368819		Os08g0485700	Os11g0575600	0.0462131
	Os10g0560700	Os01g0123700	0.0402353		Os08g0416000	Os12g0638300	0.0320293		Os05g0537100	Os10g0542900	0.0462018
	Os04g0550200	Os01g0123700	0.0396746		Os01g0141000	Os12g0637100	0.0368294		Os07g0683200	Os10g0542900	0.0458846
	Os11g0705200	Os01g0123700	0.0364679		Os02g0603600	Os12g0637100	0.0358627		Os01g0975300	Os10g0542900	0.0415049
	Os01g0192300	Os02g0674233	0.041742		Os10g0562900	Os12g0637100	0.0341249		Os01g0196300	Os10g0542900	0.0408967
	Os08g0442400	Os02g0674233	0.0396721		Os01g0140700	Os12g0637100	0.032685		Os08g0159500	Os03g0228200	0.0461751
	Os04g0590400	Os02g0674233	0.036802		Os09g0572000	Os12g0637100	0.0325284		Os06g0728700	Os03g0228200	0.0443578
	Os12g0612700	Os11g0177200	0.0417236		Os06g0649000	Os03g0412400	0.0367435		Os02g0806300	Os03g0228200	0.039314
	Os05g0500600	Os11g0177200	0.037238		Os02g0654700	Os03g0412400	0.036573		Os06g0703900	Os07g0569800	0.0461697
	Os02g0732600	Os11g0177200	0.0359962		Os04g0517100	Os03g0412400	0.0358767		Os04g0489600	Os10g0368200	0.0461367
	Os02g0178100	Os08g0393900	0.0417174		Os05g0322900	Os03g0412400	0.0351094		Os02g0806300	Os10g0368200	0.0457756
	Os04g0550200	Os08g0393900	0.0396511		Os07g0225300	Os03g0412400	0.0346491		Os07g0683200	Os04g0338000	0.0461134
	Os08g0174500	Os08g0393900	0.0358823		Os09g0334500	Os03g0412400	0.0323423		Os05g0569300	Os04g0338000	0.0407914
	Os04g0541700	Os03g0320100	0.0417038		Os01g0298400	Os03g0412400	0.0318122		Os07g0688200	Os05g0155200	0.0461031
	Os08g0442400	Os03g0320100	0.0395601		Os02g0181300	Os03g0412400	0.0317744		Os01g0140700	Os04g0111100	0.0460995
	Os09g0286600	Os03g0320100	0.0394856		Os04g0590400	Os03g0790700	0.0366906		Os01g0575200	Os04g0111100	0.0443478
	Os12g0515500	Os03g0320100	0.0375583		Os09g0434500	Os03g0790700	0.0336464		Os07g0680400	Os04g0111100	0.0432986
	Os01g0192300	Os03g0320100	0.0362529		Os10g0376900	Os03g0790700	0.0335738		Os01g0826400	Os04g0111100	0.0419714
	Os03g0657400	Os12g0639600	0.0416957		Os04g0541700	Os03g0790700	0.0320517		Os06g0649000	Os04g0111100	0.0395665
	Os03g0711100	Os03g0700700	0.0416822		Os05g0525900	Os01g0947833	0.0366833		Os06g0728700	Os12g0634700	0.0460882
	Os01g0524500	Os03g0700700	0.0366651		Os01g0826400	Os06g0521500	0.036663		Os05g0195700	Os12g0634700	0.0423421
	Os08g0174500	Os03g0700700	0.0365797		Os09g0572000	Os06g0521500	0.0365716		Os05g0579600	Os12g0634700	0.0407013
	Os10g0562100	Os03g0388100	0.0416525		Os07g0680400	Os06g0521500	0.0362574		Os01g0826400	Os09g0355400	0.0460794
	Os02g0285900	Os03g0388100	0.0401482		Os01g0185900	Os06g0521500	0.0359401		Os07g0680400	Os09g0355400	0.0450211
	Os04g0557800	Os08g0443800	0.0416501		Os01g0140700	Os06g0521500	0.0357637		Os09g0572000	Os09g0355400	0.0405265
	Os10g0536100	Os08g0443800	0.0414172		Os04g0515900	Os06g0521500	0.0341616		Os05g0426200	Os09g0355400	0.0395235
	Os04g0515900	Os07g0409900	0.0416422		Os09g0410700	Os06g0521500	0.0336879		Os07g0680400	Os07g0539900	0.0460422
	Os10g0562100	Os07g0409900	0.0394231		Os02g0603600	Os06g0521500	0.0331834		Os07g0683200	Os01g0699100	0.0460227
	Os05g0426200	Os07g0409900	0.0361475		Os01g0575200	Os06g0521500	0.0311839		Os01g0867300	Os01g0699100	0.0418655
	Os02g0181300	Os03g0285800	0.0416343		Os02g0181300	Os11g0168600	0.0366549		Os01g0305900	Os01g0855600	0.0460203
	Os01g0524500	Os03g0285800	0.0386433		Os03g0183200	Os11g0168600	0.0322899		Os05g0444200	Os01g0855600	0.0404711
	Os08g0159500	Os03g0285800	0.0381207		Os01g0575200	Os03g0194900	0.0366306		Os03g0198600	Os01g0855600	0.0402558
	Os05g0500600	Os03g0285800	0.0359777		Os02g0706600	Os08g0203350	0.0365934		Os03g0815100	Os01g0908200	0.0460013
	Os01g0524500	Os01g0557100	0.0416328		Os01g0975300	Os08g0203350	0.0355837		Os09g0334500	Os01g0908200	0.0394212
	Os04g0541700	Os01g0557100	0.0411857		Os05g0195700	Os04g0513400	0.0365509		Os03g0657400	Os11g0558900	0.0459914
	Os02g0285900	Os01g0557100	0.0409262		Os03g0764900	Os04g0513400	0.0354949		Os05g0537100	Os10g0490100	0.0459662
	Os08g0249000	Os01g0557100	0.039047		Os05g0195700	Os02g0683800	0.0364853		Os06g0649000	Os10g0490100	0.0455738
	Os01g0192300	Os01g0557100	0.0382987		Os05g0488600	Os10g0140700	0.036441		Os05g0322900	Os10g0490100	0.0406502
	Os03g0711100	Os01g0557100	0.0377578		Os03g0198600	Os10g0140700	0.0356899		Os01g0816100	Os09g0537700	0.04596
	Os01g0140700	Os01g0557100	0.0361084		Os07g0617000	Os10g0140700	0.0321761		Os07g0680400	Os09g0537700	0.0434062
	Os03g0182800	Os01g0912850	0.0416206		Os10g0376900	Os08g0547300	0.0364293		Os04g0546800	Os09g0537700	0.0428138
	Os06g0519400	Os01g0156300	0.0416205		Os01g0140700	Os08g0547300	0.0361659		Os05g0525900	Os09g0537700	0.0410244
	Os03g0711100	Os11g0194800	0.041615		Os11g0705200	Os08g0547300	0.0317989		Os03g0183000	Os02g0242900	0.0459454
	Os08g0174500	Os11g0194800	0.0393489		Os03g0657400	Os03g0255500	0.0364227		Os01g0826400	Os02g0242900	0.0400806
	Os01g0935000	Os07g0642200	0.0416085		Os01g0141000	Os03g0255500	0.0341082		Os09g0572000	Os02g0242900	0.0397444
	Os07g0178600	Os07g0642200	0.0385149		Os05g0195700	Os03g0255500	0.0312951		Os05g0426200	Os01g0123900	0.0459438
	Os01g0192300	Os04g0412500	0.0416042		Os05g0343400	Os03g0255500	0.0310258		Os04g0489600	Os08g0398300	0.045937
	Os01g0524500	Os04g0412500	0.0372825		Os06g0649000	Os02g0475400	0.0363898		Os02g0603600	Os08g0398300	0.0398397
	Os04g0557800	Os05g0342100	0.0416003		Os05g0525900	Os02g0475400	0.0342422		Os04g0557800	Os08g0398300	0.0398338
	Os10g0536100	Os05g0342100	0.0373356		Os04g0546800	Os02g0475400	0.0321474		Os03g0183200	Os05g0184901	0.0458544
	Os01g0975300	Os07g0572300	0.0415903		Os01g0575200	Os03g0242300	0.0362295		Os01g0867300	Os05g0184901	0.0424476
	Os03g0657400	Os04g0226340	0.0415832		Os03g0657400	Os03g0242300	0.0352153		Os05g0183100	Os10g0419400	0.0458435
	Os02g0603600	Os04g0226340	0.0396344		Os06g0662200	Os03g0242300	0.0337134		Os05g0553400	Os10g0419400	0.0434894
	Os10g0562900	Os04g0226340	0.0355462		Os12g0515500	Os05g0365600	0.0362256		Os07g0680400	Os10g0419400	0.0393836
	Os01g0975300	Os05g0107900	0.0415644		Os04g0546800	Os01g0628700	0.0361554		Os01g0246700	Os04g0608600	0.0458255
	Os10g0376900	Os05g0141300	0.041555		Os07g0225300	Os01g0628700	0.0350165		Os05g0343400	Os04g0608600	0.041112
	Os03g0188400	Os05g0141300	0.0378078		Os09g0334500	Os01g0628700	0.0327979		Os05g0488600	Os12g0617250	0.0458046
	Os01g0140700	Os01g0564300	0.0415498		Os05g0361700	Os01g0628700	0.0314768		Os03g0764100	Os02g0632900	0.0457826
	Os01g0185900	Os01g0564300	0.036797		Os05g0183100	Os09g0274900	0.0360787		Os08g0485700	Os02g0632900	0.0403755
	Os09g0410700	Os01g0564300	0.0365023		Os01g0625300	Os09g0274900	0.0357386		Os03g0657400	Os07g0539100	0.045768
	Os01g0192300	Os01g0898800	0.0414944		Os08g0386200	Os09g0274900	0.0315339		Os01g0695900	Os06g0229066	0.0456861
	Os04g0541700	Os09g0306650	0.0414735		Os05g0322900	Os09g0274900	0.0314209		Os08g0159500	Os08g0526200	0.0456785
	Os03g0231950	Os09g0306650	0.0382387		Os06g0649000	Os09g0274900	0.0306743		Os01g0624700	Os08g0526200	0.0417387
	Os03g0711100	Os09g0306650	0.0376462		Os05g0553400	Os04g0598800	0.0360228		Os08g0159500	Os10g0406900	0.0456724
	Os08g0159500	Os09g0306650	0.0361799		Os01g0575200	Os04g0598800	0.0352565		Os08g0485700	Os10g0406900	0.0441987
	Os04g0493000	Os11g0465200	0.0414675		Os01g0826400	Os04g0598800	0.0352317		Os05g0183100	Os04g0645500	0.0456514
	Os02g0732600	Os11g0465200	0.0376108		Os06g0649000	Os04g0598800	0.0348875		Os07g0158500	Os01g0174100	0.0456385
	Os01g0975300	Os09g0541000	0.0414524		Os09g0572000	Os04g0598800	0.0331174		Os06g0166400	Os01g0174100	0.0428849
	Os05g0426200	Os09g0541000	0.0392411		Os11g0705200	Os04g0598800	0.0319341		Os08g0562300	Os01g0174100	0.0395613
	Os08g0357300	Os09g0541000	0.0373474		Os05g0322900	Os04g0458300	0.0360138		Os09g0572000	Os10g0180800	0.0456015
	Os10g0376900	Os09g0541000	0.0363667		Os09g0417600	Os04g0458300	0.0312816		Os04g0515900	Os10g0180800	0.0437935
	Os03g0113500	Os04g0411800	0.0414472		Os09g0572000	Os04g0611400	0.0359574		Os07g0680400	Os12g0639600	0.0455635
	Os03g0231950	Os12g0547100	0.0414117		Os10g0562900	Os04g0611400	0.0338568		Os03g0657400	Os12g0639600	0.0444734
	Os06g0284500	Os12g0547100	0.035381		Os07g0680400	Os04g0611400	0.0329137		Os07g0688200	Os03g0400700	0.045503
	Os01g0292900	Os08g0320400	0.041409		Os04g0515900	Os04g0611400	0.0315258		Os04g0540200	Os03g0400700	0.0434614
	Os07g0680400	Os08g0320400	0.0401511		Os02g0603600	Os05g0355400	0.0359141		Os09g0481700	Os03g0400700	0.0425155
	Os02g0221100	Os08g0320400	0.0394268		Os02g0181300	Os05g0355400	0.033973		Os06g0703900	Os03g0400700	0.0406897
	Os01g0975300	Os08g0320400	0.0353808		Os03g0437200	Os05g0355400	0.0307645		Os08g0562300	Os03g0400700	0.0388361
	Os05g0343400	Os03g0348200	0.0414002		Os03g0657400	Os03g0189400	0.0358544		Os09g0572000	Os01g0670100	0.0454845
	Os03g0183000	Os03g0348200	0.0394045		Os11g0603000	Os03g0189400	0.032022		Os06g0649000	Os01g0670100	0.0454161
	Os06g0649000	Os03g0348200	0.0378026		Os02g0603600	Os03g0189400	0.0316931		Os10g0562900	Os01g0670100	0.0412981
	Os09g0572000	Os03g0786400	0.0414002		Os05g0195700	Os03g0167600	0.0358314		Os05g0195700	Os01g0670100	0.0403006
	Os10g0490400	Os03g0786400	0.037069		Os03g0764900	Os03g0167600	0.035741		Os10g0562900	Os06g0128800	0.0454811
	Os01g0524500	Os03g0786400	0.0359137		Os02g0638650	Os03g0167600	0.0310087		Os09g0572000	Os06g0128800	0.0446294
	Os08g0159500	Os10g0190500	0.0414002		Os01g0575200	Os07g0569800	0.0357969		Os01g0826400	Os06g0128800	0.0441344
	Os10g0376900	Os10g0190500	0.0413654		Os05g0322900	Os07g0569800	0.0352328		Os03g0657400	Os07g0659300	0.0454661
	Os08g0537900	Os10g0190500	0.0381562		Os09g0417600	Os07g0569800	0.0343697		Os04g0489600	Os07g0659300	0.0446528
	Os04g0590400	Os08g0151400	0.0413981		Os05g0343400	Os07g0569800	0.0331061		Os01g0935000	Os07g0659300	0.044312
	Os03g0720800	Os08g0151400	0.0367691		Os07g0225300	Os07g0569800	0.0310237		Os04g0590400	Os07g0659300	0.0422719
	Os10g0536100	Os08g0151400	0.0362813		Os04g0541700	Os06g0678500	0.035792		Os09g0434500	Os07g0659300	0.0394101
	Os01g0292900	Os08g0151400	0.035965		Os01g0975300	Os07g0603800	0.0357164		Os04g0541700	Os07g0659300	0.0387994
	Os02g0181300	Os02g0209300	0.0413951		Os01g0141000	Os07g0603800	0.0315733		Os10g0376900	Os08g0202200	0.0454557
	Os03g0437200	Os02g0209300	0.0398405		Os01g0185900	Os07g0251200	0.0356942		Os04g0590400	Os08g0202200	0.0449716
	Os02g0654700	Os02g0209300	0.0364807		Os09g0410700	Os07g0251200	0.0310924		Os04g0489600	Os08g0202200	0.0429129
	Os06g0649000	Os09g0341600	0.0413895		Os11g0705200	Os01g0279400	0.0356911		Os07g0617000	Os08g0202200	0.0410186
	Os04g0515900	Os09g0341600	0.0368575		Os02g0132500	Os01g0279400	0.0313884		Os02g0603600	Os08g0202200	0.0398914
	Os01g0826400	Os09g0341600	0.0357578		Os01g0975300	Os01g0279400	0.0307303		Os09g0434500	Os08g0202200	0.0395892
	Os05g0537100	Os09g0341600	0.0352934		Os10g0536100	Os02g0484975	0.0356615		Os03g0198600	Os04g0514600	0.0454361
	Os01g0292900	Os06g0687600	0.0413842		Os02g0132500	Os01g0711000	0.0356477		Os01g0826400	Os04g0514600	0.0434852
	Os05g0426200	Os01g0286500	0.0413349		Os10g0562900	Os01g0711000	0.0305412		Os02g0181300	Os04g0514600	0.0432476
	Os03g0182800	Os03g0431200	0.0413338		Os05g0361700	Os12g0638200	0.0356277		Os04g0517100	Os04g0514600	0.040502
	Os03g0164300	Os03g0431200	0.0372195		Os07g0617000	Os02g0483500	0.0355484		Os01g0246700	Os04g0514600	0.0402185
	Os03g0657400	Os07g0539100	0.0413252		Os02g0181300	Os02g0483500	0.0306433		Os02g0181300	Os02g0703300	0.0454288
	Os03g0821200	Os04g0403900	0.0413227		Os09g0509700	Os05g0489200	0.035509		Os09g0334500	Os02g0703300	0.0430917
	Os03g0135700	Os04g0403900	0.0386232		Os05g0572000	Os05g0489200	0.0303838		Os01g0575200	Os08g0203400	0.0453546
	Os06g0649000	Os06g0128800	0.0413209		Os05g0525900	Os12g0263600	0.0354521		Os06g0649000	Os08g0203400	0.0439068
	Os10g0562900	Os06g0128800	0.0389469		Os03g0198600	Os12g0263600	0.0325756		Os01g0826400	Os08g0203400	0.042927
	Os01g0826400	Os06g0128800	0.0371252		Os07g0225300	Os12g0263600	0.030332		Os04g0590400	Os03g0848700	0.0453319
	Os01g0975300	Os04g0474700	0.0413112		Os05g0553400	Os11g0678000	0.0353789		Os04g0541700	Os03g0848700	0.0437268
	Os05g0474800	Os04g0474700	0.0399365		Os05g0183100	Os11g0678000	0.0351444		Os03g0764900	Os03g0848700	0.0427881
	Os11g0705200	Os04g0474700	0.0382042		Os02g0181300	Os11g0678000	0.0328154		Os09g0286600	Os03g0848700	0.0403652
	Os02g0221100	Os04g0474700	0.0374019		Os08g0386200	Os11g0678000	0.0308207		Os09g0434500	Os03g0848700	0.0389476
	Os10g0490400	Os04g0474700	0.03647		Os09g0334500	Os01g0859200	0.0353434		Os08g0159500	Os04g0423400	0.0453083
	Os03g0657400	Os02g0310400	0.0412993		Os09g0287000	Os01g0859200	0.0332886		Os05g0426200	Os07g0106200	0.0452733
	Os08g0504000	Os02g0310400	0.039552		Os04g0489600	Os08g0203100	0.0352795		Os09g0572000	Os07g0106200	0.0407542
	Os03g0135700	Os02g0310400	0.0377491		Os10g0376900	Os08g0203100	0.0338985		Os07g0680400	Os07g0106200	0.0388261
	Os03g0720800	Os02g0310400	0.0357581		Os07g0617000	Os08g0203100	0.0306819		Os06g0703900	Os06g0653000	0.0452612
	Os03g0182800	Os04g0468600	0.0412815		Os11g0603000	Os08g0203100	0.0304706		Os10g0562900	Os02g0275200	0.045231
	Os04g0517100	Os04g0468600	0.0397061		Os02g0132500	Os08g0203100	0.0301335		Os01g0575200	Os05g0181700	0.0452083
	Os12g0586300	Os05g0384300	0.0412614		Os05g0553400	Os11g0649700	0.0352128		Os02g0181300	Os05g0181700	0.0425191
	Os10g0536100	Os05g0384300	0.0362946		Os10g0562900	Os11g0649700	0.0305397		Os03g0815100	Os05g0181700	0.0416288
	Os08g0249000	Os02g0761400	0.0412538		Os09g0410700	Os07g0491800	0.0351815		Os03g0198600	Os05g0181700	0.0402639
	Os02g0285900	Os02g0761400	0.0407521		Os02g0603600	Os11g0227200	0.035166		Os03g0437200	Os05g0181700	0.0394284
	Os11g0175700	Os02g0761400	0.0371134		Os01g0141000	Os11g0227200	0.0349633		Os08g0386200	Os05g0181700	0.0389728
	Os10g0376900	Os05g0473000	0.0412479		Os09g0572000	Os11g0227200	0.0321568		Os01g0975300	Os03g0326200	0.0452036
	Os07g0617000	Os05g0473000	0.040931		Os03g0183000	Os11g0227200	0.0308383		Os05g0553400	Os03g0326200	0.0418244
	Os02g0603600	Os05g0473000	0.039532		Os10g0562900	Os11g0227200	0.0306681		Os05g0569300	Os03g0326200	0.0388756
	Os11g0603000	Os05g0473000	0.0387682		Os03g0657400	Os11g0227200	0.029963		Os04g0489600	Os04g0525200	0.0451932
	Os04g0489600	Os05g0473000	0.0368531		Os07g0680400	Os10g0504200	0.0351305		Os02g0132500	Os04g0525200	0.0398116
	Os03g0711100	Os10g0350800	0.0412472		Os05g0525900	Os10g0504200	0.0349915		Os04g0590400	Os05g0145100	0.0451777
	Os04g0493000	Os10g0350800	0.0385986		Os01g0141000	Os10g0504200	0.0322693		Os10g0562900	Os02g0600400	0.0451474
	Os06g0728700	Os10g0350800	0.0382927		Os03g0198600	Os10g0504200	0.0299399		Os05g0426200	Os02g0600400	0.0446636
	Os08g0249000	Os10g0350800	0.0369817		Os01g0575200	Os06g0206900	0.0351166		Os03g0183000	Os02g0600400	0.0444312
	Os08g0537900	Os10g0350800	0.0358044		Os04g0541700	Os06g0206900	0.0311528		Os01g0141000	Os02g0600400	0.0425016
	Os07g0683200	Os07g0541500	0.0412403		Os09g0286600	Os06g0206900	0.0301695		Os04g0517100	Os12g0130300	0.0451162
	Os09g0572000	Os12g0569500	0.0412135		Os09g0287000	Os01g0650200	0.0349988		Os01g0816100	Os12g0130300	0.0450207
	Os10g0490400	Os12g0569500	0.0358521		Os07g0617000	Os01g0650200	0.0341192		Os04g0489600	Os04g0319700	0.0451089
	Os04g0493000	Os03g0110900	0.0412094		Os09g0434500	Os08g0203201	0.0349838		Os05g0426200	Os04g0319700	0.0429578
	Os08g0174500	Os11g0115400	0.0412062		Os02g0603600	Os08g0203201	0.0317389		Os09g0549450	Os01g0130900	0.0450457
	Os01g0192300	Os11g0115400	0.0371719		Os06g0649000	Os07g0663800	0.0347686		Os02g0187700	Os01g0130900	0.038378
	Os10g0490400	Os11g0115400	0.0371263		Os04g0517100	Os07g0663800	0.0334217		Os07g0683200	Os04g0288100	0.0450394
	Os03g0109000	Os03g0167600	0.0411782		Os02g0181300	Os07g0663800	0.0327056		Os07g0680400	Os04g0288100	0.0444733
	Os08g0537900	Os05g0111200	0.0411718		Os07g0225300	Os07g0663800	0.0304294		Os08g0442400	Os09g0357400	0.0450252
	Os05g0343400	Os01g0952100	0.0411699		Os03g0437200	Os07g0663800	0.0301284		Os10g0562900	Os07g0150700	0.0449896
	Os06g0649000	Os01g0952100	0.0368003		Os09g0287000	Os06g0710300	0.034726		Os01g0975300	Os04g0585700	0.0449557
	Os03g0183000	Os01g0952100	0.0361771		Os10g0562900	Os06g0710300	0.0335933		Os09g0481700	Os04g0585700	0.0432481
	Os07g0683200	Os01g0952100	0.035481		Os02g0654700	Os06g0710300	0.0313959		Os09g0334500	Os04g0585700	0.0429881
	Os02g0178100	Os12g0478900	0.0411545		Os02g0603600	Os06g0710300	0.0295711		Os04g0557800	Os04g0585700	0.0399592
	Os03g0113500	Os12g0478900	0.0382553		Os04g0590400	Os06g0655100	0.0346385		Os08g0485700	Os04g0585700	0.0387122
	Os03g0821200	Os02g0207500	0.0411517		Os09g0434500	Os06g0655100	0.0336648		Os05g0444200	Os04g0585700	0.0386393
	Os01g0140700	Os02g0207500	0.0395785		Os01g0511000	Os09g0400400	0.0345781		Os01g0246700	Os01g0921100	0.0449282
	Os05g0565900	Os11g0482200	0.0411496		Os12g0515500	Os03g0582000	0.0344386		Os06g0166400	Os01g0921100	0.0405929
	Os03g0657400	Os11g0482200	0.036057		Os07g0617000	Os08g0452900	0.034412		Os11g0684000	Os01g0921100	0.038838
	Os04g0541700	Os08g0416800	0.0411425		Os06g0649000	Os09g0322400	0.0343631		Os02g0654700	Os02g0126400	0.0449005
	Os02g0285900	Os08g0416800	0.0362057		Os09g0481700	Os09g0322400	0.0323723		Os03g0437200	Os02g0126400	0.0402358
	Os02g0603600	Os09g0339000	0.041139		Os04g0546800	Os09g0322400	0.0320729		Os05g0553400	Os08g0509100	0.0448994
	Os10g0376900	Os09g0339000	0.0367297		Os07g0683200	Os09g0322400	0.0320164		Os07g0680400	Os08g0509100	0.0403644
	Os08g0537900	Os02g0759900	0.0410855		Os03g0183000	Os09g0322400	0.0301334		Os02g0221100	Os08g0509100	0.0400771
	Os04g0493000	Os02g0759900	0.0399429		Os12g0515500	Os01g0704300	0.0343184		Os01g0196300	Os08g0395700	0.0448513
	Os08g0159500	Os02g0759900	0.0391807		Os03g0183200	Os01g0704300	0.0307834		Os01g0695900	Os08g0395700	0.040899
	Os10g0376900	Os02g0759900	0.0354407		Os08g0386200	Os04g0679400	0.0342877		Os01g0584900	Os08g0395700	0.0396847
	Os11g0705200	Os02g0695900	0.0410787		Os05g0361700	Os04g0679400	0.0339141		Os09g0572000	Os01g0567400	0.0448221
	Os05g0322900	Os03g0661600	0.0410621		Os03g0183200	Os04g0679400	0.0293519		Os08g0159500	Os04g0111200	0.0447811
	Os03g0182800	Os03g0661600	0.039708		Os07g0225300	Os04g0679400	0.0293368		Os08g0485700	Os04g0111200	0.0445043
	Os08g0386200	Os03g0661600	0.0359223		Os09g0410700	Os08g0161500	0.0342694		Os01g0975300	Os04g0111200	0.0443105
	Os08g0174500	Os03g0661600	0.035277		Os01g0141000	Os08g0161500	0.0320425		Os06g0649000	Os11g0669100	0.044759
	Os03g0657400	Os01g0713200	0.0410574		Os01g0140700	Os08g0161500	0.0297204		Os01g0511000	Os11g0669100	0.0413163
	Os02g0221100	Os01g0713200	0.0371367		Os05g0322900	Os05g0487300	0.0341859		Os05g0426200	Os06g0521500	0.0447027
	Os07g0680400	Os01g0713200	0.035953		Os08g0386200	Os05g0487300	0.0334478		Os04g0515900	Os06g0521500	0.0438855
	Os02g0656600	Os11g0173900	0.0410105		Os03g0183200	Os05g0487300	0.0331771		Os07g0680400	Os06g0521500	0.0409731
	Os05g0195700	Os11g0173900	0.0403155		Os09g0417600	Os05g0487300	0.0299909		Os01g0140700	Os09g0356800	0.0446653
	Os06g0728700	Os11g0173900	0.0361988		Os09g0334500	Os05g0487300	0.029238		Os07g0680400	Os09g0356800	0.0441758
	Os02g0732600	Os11g0543600	0.0409382		Os03g0198600	Os02g0314300	0.0340927		Os06g0649000	Os09g0356800	0.0412734
	Os04g0541700	Os01g0172800	0.0409353		Os02g0638650	Os02g0314300	0.0330919		Os05g0426200	Os09g0356800	0.039797
	Os02g0174300	Os01g0172800	0.0375493		Os05g0488600	Os02g0314300	0.0328034		Os02g0221100	Os02g0738200	0.044661
	Os08g0159500	Os01g0172800	0.0369485		Os04g0517100	Os02g0314300	0.0308087		Os06g0649000	Os02g0738200	0.0384039
	Os06g0649000	Os04g0691900	0.0409249		Os03g0198600	Os03g0836300	0.033937		Os04g0546800	Os03g0238300	0.0444981
	Os03g0182800	Os04g0691900	0.0400142		Os05g0322900	Os03g0836300	0.0317954		Os06g0726300	Os01g0604500	0.0444928
	Os01g0140700	Os07g0660100	0.0409188		Os08g0416000	Os03g0836300	0.0317552		Os08g0386200	Os01g0604500	0.0441821
	Os04g0590400	Os07g0660100	0.0361764		Os03g0815100	Os03g0836300	0.0312862		Os09g0334500	Os01g0604500	0.0421211
	Os08g0159500	Os04g0456700	0.0409084		Os07g0680400	Os03g0836300	0.0301937		Os01g0826400	Os04g0578000	0.0444471
	Os04g0541700	Os03g0196600	0.0409066		Os04g0546800	Os03g0836300	0.0292684		Os01g0867300	Os04g0578000	0.0435259
	Os05g0426200	Os04g0103700	0.0408893		Os03g0764100	Os01g0763750	0.0339165		Os05g0569300	Os04g0578000	0.0385367
	Os05g0536250	Os04g0103700	0.0353892		Os11g0705200	Os01g0763750	0.0333097		Os01g0816100	Os07g0575900	0.0443797
	Os04g0557800	Os04g0103700	0.0351211		Os09g0522200	Os03g0305400	0.0338846		Os05g0537100	Os07g0575900	0.0378339
	Os10g0490400	Os01g0978400	0.0408852		Os03g0198600	Os03g0305400	0.0311793		Os08g0562300	Os01g0796400	0.0443275
	Os04g0493000	Os01g0978400	0.0384643		Os04g0610400	Os03g0305400	0.0307657		Os04g0557800	Os01g0796400	0.0427029
	Os01g0511000	Os08g0203400	0.040837		Os03g0815100	Os03g0305400	0.0292409		Os05g0569300	Os01g0796400	0.0382865
	Os07g0680400	Os08g0203400	0.0359825		Os09g0410700	Os03g0223100	0.0338731		Os09g0481700	Os01g0796400	0.0377505
	Os03g0821200	Os05g0477900	0.0408206		Os09g0286600	Os03g0223100	0.0335023		Os04g0590400	Os05g0568800	0.0443183
	Os01g0575200	Os05g0477900	0.0406978		Os01g0192300	Os03g0223100	0.0320629		Os08g0159500	Os05g0568800	0.0381628
	Os04g0590400	Os05g0477900	0.03688		Os01g0140700	Os03g0223100	0.0288932		Os08g0159500	Os03g0660400	0.0442662
	Os10g0536100	Os05g0477900	0.0351471		Os10g0562900	Os04g0401700	0.0338117		Os02g0806300	Os03g0660400	0.0402609
	Os01g0140700	Os05g0477900	0.0351222		Os03g0657400	Os04g0401700	0.0320878		Os04g0557800	Os06g0618700	0.0442642
	Os01g0292900	Os05g0477900	0.0349183		Os03g0764100	Os04g0401700	0.0305854		Os09g0434500	Os06g0618700	0.0433931
	Os11g0705200	Os05g0477900	0.0348653		Os07g0680400	Os07g0628700	0.0335716		Os04g0590400	Os06g0618700	0.0430007
	Os06g0284500	Os03g0226700	0.0408193		Os12g0515500	Os07g0628700	0.0330492		Os10g0376900	Os06g0618700	0.0390916
	Os02g0285900	Os03g0226700	0.0363648		Os10g0562900	Os07g0628700	0.0315293		Os01g0935000	Os06g0618700	0.0384973
	Os09g0431900	Os03g0226700	0.0359456		Os03g0198600	Os07g0628700	0.0313155		Os02g0132500	Os06g0618700	0.0380982
	Os05g0572000	Os03g0226700	0.0358313		Os02g0181300	Os07g0628700	0.0297403		Os01g0575200	Os07g0538350	0.0442426
	Os08g0249000	Os04g0657300	0.040805		Os02g0706600	Os07g0628700	0.0292558		Os04g0489600	Os02g0625300	0.0442383
	Os05g0343400	Os06g0239100	0.0408039		Os04g0489600	Os07g0570100	0.0332947		Os08g0485700	Os02g0625300	0.0415547
	Os01g0575200	Os06g0239100	0.0354828		Os02g0603600	Os07g0570100	0.0325332		Os01g0975300	Os02g0625300	0.0407219
	Os05g0474800	Os06g0239100	0.0347105		Os11g0603000	Os07g0570100	0.0317333		Os08g0562300	Os02g0625300	0.039404
	Os11g0707300	Os06g0600301	0.0407982		Os03g0657400	Os07g0570100	0.0300808		Os09g0286600	Os01g0931000	0.0442205
	Os10g0490400	Os06g0600301	0.039664		Os03g0183000	Os05g0136200	0.0332899		Os08g0442400	Os01g0931000	0.0433445
	Os12g0586300	Os06g0600301	0.0372916		Os01g0826400	Os05g0136200	0.0297074		Os09g0434500	Os08g0355400	0.0442175
	Os03g0113500	Os06g0600301	0.0372392		Os01g0298400	Os05g0136200	0.0293176		Os05g0343400	Os02g0571300	0.0442132
[truncated: 4,104 more rows]
