# Supplementary material for: Transcriptome-derived networks reconstruct distinct immune strategies under different iron availability between Arabidopsis and rice
Source: Research Square preprint supplement (doi:10.21203/rs.3.rs-3214423/v1), 2024-07-15
Supplement: Supplementary file 7 [file 8dde776a16e930e79249ea8f.xlsx]

## Sheet: GSEA Arabidopsis
	GO terms	Description	Set size	Enrichment Score	P	adjusted P	Rank
-Fe	GO:0000003	reproduction	50	0.405494	9.64494e-05	0.0110766	173
	GO:0071702	organic substance transport	30	0.466028	0.000252911	0.0148269	40
	GO:0046283	anthocyanin-containing compound metabolic process	9	0.687418	0.000412402	0.0214907	58
	GO:0009812	flavonoid metabolic process	14	0.59769	0.00100325	0.0326454	73
	GO:0006869	lipid transport	8	0.703791	0.000892988	0.0326454	40
	GO:1901699	cellular response to nitrogen compound	6	0.767361	0.00105848	0.0326454	8
	GO:0009737	response to abscisic acid	76	0.298411	0.000929623	0.0326454	142
	GO:0006811	monoatomic ion transport	9	0.630685	0.00166594	0.0355148	1
	GO:0009719	response to endogenous stimulus	147	0.222695	0.00162912	0.0355148	79
suf	GO:0009664	plant-type cell wall organization	11	0.812201	8.29128e-05	0.0267783	6
+Fe	GO:0046283	anthocyanin-containing compound metabolic process	16	0.776601	1.66848e-06	0.00031815	38
	GO:0009812	flavonoid metabolic process	27	0.667963	2.87193e-06	0.000358991	109
	GO:1901700	response to oxygen-containing compound	234	0.311843	7.84006e-05	0.00435559	211
	GO:0009737	response to abscisic acid	95	0.402537	0.00011337	0.00520446	206
	GO:0009719	response to endogenous stimulus	192	0.319914	0.000114498	0.00520446	210
	GO:1902074	response to salt	112	0.383674	0.000148507	0.00571179	221
	GO:2000142	regulation of DNA-templated transcription initiation	6	0.856296	0.000348605	0.0116202	103
	GO:0033993	response to lipid	198	0.310424	0.000416959	0.01303	210
	GO:0006970	response to osmotic stress	73	0.398457	0.000883829	0.025995	204

## Sheet: GSEA rice
	GO terms	Description	Set size	Enrichment Score	P	adjusted P	Rank
-Fe	GO:0015979	photosynthesis	27	0.46532	0.000289366	0.0862309	1140
	GO:0035970	peptidyl-threonine dephosphorylation	6	0.78244	0.000339492	0.0862309	344
	GO:0006396	RNA processing	15	0.471647	0.00606048	0.69019	1189
	GO:0006412	translation	18	0.397773	0.0181738	0.69019	885
	GO:0016051	carbohydrate biosynthetic process	23	0.350497	0.0163715	0.69019	1461
	GO:0006790	sulfur compound metabolic process	17	0.368094	0.025974	0.69019	413
	GO:0032259	methylation	6	0.572864	0.036963	0.69019	110
	GO:0008380	RNA splicing	7	0.527349	0.042957	0.69019	645
	GO:0098754	detoxification	7	0.508339	0.046953	0.69019	552
	GO:0048608	reproductive structure development	14	0.359495	0.034965	0.69019	656
suf	GO:1901135	carbohydrate derivative metabolic process	13	0.531807	0.00279337	0.402245	255
	GO:0006790	sulfur compound metabolic process	6	0.719524	0.00205341	0.402245	289
	GO:0019637	organophosphate metabolic process	13	0.505988	0.00487071	0.467588	508
	GO:0035970	peptidyl-threonine dephosphorylation	6	0.615883	0.0135259	0.706203	230
	GO:0072521	purine-containing compound metabolic process	6	0.555996	0.033966	0.706203	454
	GO:0048608	reproductive structure development	7	0.493871	0.043956	0.706203	281
+Fe	GO:0009736	cytokinin-activated signaling pathway	7	0.689389	0.0023124	0.225429	490
	GO:0006749	glutathione metabolic process	6	0.729533	0.0022014	0.225429	84
	GO:0006790	sulfur compound metabolic process	8	0.637709	0.00323734	0.225429	571
	GO:0006644	phospholipid metabolic process	8	0.622597	0.00479635	0.225429	349
	GO:0030243	cellulose metabolic process	5	0.734982	0.00412711	0.225429	224
	GO:0048608	reproductive structure development	10	0.545994	0.00665537	0.250242	272
	GO:1901137	carbohydrate derivative biosynthetic process	8	0.585659	0.00949062	0.276022	200
	GO:0009628	response to abiotic stimulus	34	0.318854	0.00874334	0.276022	246
	GO:0046486	glycerolipid metabolic process	8	0.552767	0.0181738	0.375624	703
	GO:0043933	protein-containing complex organization	9	0.513993	0.0211777	0.375624	389
	GO:0019637	organophosphate metabolic process	18	0.389826	0.0208773	0.375624	851
	GO:0071840	cellular component organization or biogenesis	29	0.321099	0.0241816	0.375624	182
	GO:0006766	vitamin metabolic process	6	0.598329	0.0211777	0.375624	631
	GO:0009266	response to temperature stimulus	18	0.377297	0.0256835	0.375624	246
	GO:0000302	response to reactive oxygen species	6	0.577773	0.027972	0.375624	182
	GO:0006259	DNA metabolic process	5	0.640976	0.024975	0.375624	564
	GO:0048511	rhythmic process	5	0.633955	0.026973	0.375624	246
	GO:0009069	serine family amino acid metabolic process	5	0.619782	0.035964	0.386357	597
	GO:0016043	cellular component organization	28	0.287908	0.038961	0.393095	182
