# Supplementary material for: Transcriptome-derived networks reconstruct distinct immune strategies under different iron availability between Arabidopsis and rice
Source: Research Square preprint supplement (doi:10.21203/rs.3.rs-3214423/v1), 2024-07-15
Supplement: Supplementary file 8 [file 9fd6539b250f46dbfb5f8139.xlsx]

## Sheet: GO terms Arabidopsis
	GO biological process complete	Ref list	Input genes	Expected	FE	P	adjusted P
Community 1	response to heat (GO:0009408)	299	8	0.84	9.53	2.37e-06	0.014
Community 2	defense response to fungus (GO:0050832)	702	78	18.17	4.29	2.27e-25	8.92e-23
	response to cold (GO:0009409)	473	43	12.24	3.51	9.32e-12	1.17e-09
	response to salicylic acid (GO:0009751)	440	38	11.39	3.34	5.88e-10	5.33e-08
	response to chitin (GO:0010200)	308	30	7.97	3.76	3.1e-09	2.4e-07
	cellular response to hypoxia (GO:0071456)	239	28	6.19	4.53	2.43e-10	2.47e-08
	innate immune response (GO:0045087)	178	22	4.61	4.77	8.45e-09	6.21e-07
	chloroplast organization (GO:0009658)	263	22	6.81	3.23	3.98e-06	0.000189
	response to molecule of bacterial origin (GO:0002237)	117	20	3.03	6.6	2.75e-10	2.75e-08
	cellular response to organic cyclic compound (GO:0071407)	259	19	6.7	2.83	9.32e-05	0.00356
	regulation of immune system process (GO:0002682)	179	18	4.63	3.88	2.9e-06	0.000147
	regulation of response to biotic stimulus (GO:0002831)	195	18	5.05	3.57	8.66e-06	0.000401
	regulation of response to external stimulus (GO:0032101)	210	18	5.44	3.31	2.18e-05	0.000938
	toxin metabolic process (GO:0009404)	118	17	3.05	5.57	5.7e-08	3.57e-06
	systemic acquired resistance (GO:0009627)	116	15	3	5	1.18e-06	6.48e-05
	leaf senescence (GO:0010150)	187	15	4.84	3.1	0.000204	0.00701
	chlorophyll biosynthetic process (GO:0015995)	62	14	1.6	8.72	6.05e-09	4.51e-07
	response to reactive oxygen species (GO:0000302)	165	14	4.27	3.28	0.000192	0.00669
	thylakoid membrane organization (GO:0010027)	52	12	1.35	8.92	6e-08	3.72e-06
	anion transmembrane transport (GO:0098656)	123	12	3.18	3.77	0.000166	0.00593
	response to oomycetes (GO:0002239)	105	11	2.72	4.05	0.000174	0.00618
	circadian rhythm (GO:0007623)	127	11	3.29	3.35	0.000776	0.0234
	response to nematode (GO:0009624)	84	9	2.17	4.14	0.000574	0.018
	response to cadmium ion (GO:0046686)	92	9	2.38	3.78	0.00104	0.0303
	cellular response to ethylene stimulus (GO:0071369)	96	9	2.48	3.62	0.00138	0.0376
	cell redox homeostasis (GO:0045454)	45	8	1.16	6.87	5.14e-05	0.00207
	response to high light intensity (GO:0009644)	63	8	1.63	4.91	0.000414	0.0132
	negative regulation of defense response (GO:0031348)	76	8	1.97	4.07	0.00128	0.0357
	photosystem II repair (GO:0010206)	13	7	0.34	20.8	3.68e-07	2.12e-05
	tryptophan biosynthetic process (GO:0000162)	23	7	0.6	11.76	7.76e-06	0.000365
	photosystem II assembly (GO:0010207)	29	7	0.75	9.33	2.79e-05	0.00118
	regulation of response to water deprivation (GO:2000070)	40	7	1.04	6.76	0.000165	0.00593
	calcium ion transmembrane transport (GO:0070588)	41	7	1.06	6.6	0.000189	0.00663
	hydrogen peroxide metabolic process (GO:0042743)	41	7	1.06	6.6	0.000189	0.00667
	response to zinc ion (GO:0010043)	46	7	1.19	5.88	0.000355	0.0114
	nucleoside diphosphate phosphorylation (GO:0006165)	62	7	1.6	4.36	0.00176	0.0454
	camalexin biosynthetic process (GO:0010120)	16	6	0.41	14.49	1.33e-05	0.0006
	indole glucosinolate metabolic process (GO:0042343)	19	6	0.49	12.2	2.97e-05	0.00124
	protein import into chloroplast stroma (GO:0045037)	26	6	0.67	8.92	0.000131	0.00481
	negative regulation of programmed cell death (GO:0043069)	30	6	0.78	7.73	0.000258	0.00858
	auxin biosynthetic process (GO:0009851)	32	6	0.83	7.24	0.00035	0.0114
	starch biosynthetic process (GO:0019252)	36	6	0.93	6.44	0.000611	0.0188
	reductive pentose-phosphate cycle (GO:0019253)	14	5	0.36	13.8	8.74e-05	0.00341
	photosynthetic electron transport in photosystem I (GO:0009773)	19	5	0.49	10.17	0.000288	0.00941
	regulation of protein serine/threonine phosphatase activity (GO:0080163)	20	5	0.52	9.66	0.000352	0.0113
	chloroplast rRNA processing (GO:1901259)	23	5	0.6	8.4	0.000612	0.0188
	photosynthesis, light harvesting in photosystem I (GO:0009768)	24	5	0.62	8.05	0.000724	0.022
	wound healing (GO:0042060)	29	5	0.75	6.66	0.00153	0.0407
	ammonia assimilation cycle (GO:0019676)	6	4	0.16	25.76	7.48e-05	0.00295
	protein import into chloroplast thylakoid membrane (GO:0045038)	7	4	0.18	22.08	0.000115	0.00432
	ribulose bisphosphate carboxylase complex assembly (GO:0110102)	9	4	0.23	17.17	0.00024	0.0081
	glycogen metabolic process (GO:0005977)	15	4	0.39	10.3	0.00115	0.0329
	protoporphyrinogen IX biosynthetic process (GO:0006782)	15	4	0.39	10.3	0.00115	0.0331
	defense response by callose deposition in cell wall (GO:0052544)	16	4	0.41	9.66	0.00141	0.0381
	starch catabolic process (GO:0005983)	17	4	0.44	9.09	0.00171	0.0443
	glutamine biosynthetic process (GO:0006542)	7	3	0.18	16.56	0.00168	0.044
Community 3	maturation of LSU-rRNA from tricistronic rRNA transcript (SSU-rRNA, 5.8S rRNA, LSU-rRNA) (GO:0000463)	19	10	0.35	28.48	5.22e-11	7.31e-09
	translational elongation (GO:0006414)	36	11	0.67	16.53	6.1e-10	7.8e-08
	protein refolding (GO:0042026)	35	10	0.65	15.46	6.41e-09	7.39e-07
	embryo development ending in seed dormancy (GO:0009793)	693	36	12.81	2.81	7.29e-08	7.95e-06
	translational initiation (GO:0006413)	61	10	1.13	8.87	6.08e-07	5.68e-05
	cytoplasmic translation (GO:0002181)	76	10	1.4	7.12	3.66e-06	0.000321
	chaperone cofactor-dependent protein refolding (GO:0051085)	48	8	0.89	9.02	7.36e-06	0.00061
	ribosomal large subunit assembly (GO:0000027)	26	6	0.48	12.49	2.1e-05	0.00153
	cellular response to unfolded protein (GO:0034620)	45	7	0.83	8.42	4.11e-05	0.00281
	somatic cell DNA recombination (GO:0016444)	9	4	0.17	24.05	6.73e-05	0.0045
	polar nucleus fusion (GO:0010197)	34	6	0.63	9.55	7.89e-05	0.00505
	cell wall biogenesis (GO:0042546)	444	21	8.21	2.56	0.000139	0.00816
	S-adenosylmethionine biosynthetic process (GO:0006556)	4	3	0.07	40.58	0.000197	0.0113
	tRNA aminoacylation for protein translation (GO:0006418)	60	7	1.11	6.31	0.000211	0.012
	ribonucleotide biosynthetic process (GO:0009260)	133	10	2.46	4.07	0.000295	0.0161
	peptidyl-glutamine methylation (GO:0018364)	5	3	0.09	32.46	0.000311	0.0168
	cytoskeleton-dependent cytokinesis (GO:0061640)	65	7	1.2	5.83	0.000331	0.0177
	monocarboxylic acid biosynthetic process (GO:0072330)	252	14	4.66	3.01	0.000396	0.0208
	mitochondrial gene expression (GO:0140053)	68	7	1.26	5.57	0.000426	0.022
	endonucleolytic cleavage in ITS1 to separate SSU-rRNA from 5.8S rRNA and LSU-rRNA from tricistronic rRNA transcript (SSU-rRNA, 5.8S rRNA, LSU-rRNA) (GO:0000447)	6	3	0.11	27.05	0.00046	0.0233
	cellular response to heat (GO:0034605)	71	7	1.31	5.33	0.000541	0.0259
	mitochondrial RNA metabolic process (GO:0000959)	71	7	1.31	5.33	0.000541	0.0261
	seed germination (GO:0009845)	99	8	1.83	4.37	0.000755	0.0327
	regulation of RNA splicing (GO:0043484)	35	5	0.65	7.73	0.000752	0.0328
	response to cold (GO:0009409)	473	20	8.74	2.29	0.000883	0.0366
	regulation of ribosome biogenesis (GO:0090069)	8	3	0.15	20.29	0.00088	0.0367
	organic hydroxy compound biosynthetic process (GO:1901617)	213	12	3.94	3.05	0.000899	0.037
	small regulatory ncRNA 3'-end processing (GO:0043628)	22	4	0.41	9.84	0.00117	0.0455
	rRNA base methylation (GO:0070475)	22	4	0.41	9.84	0.00117	0.0458
	RNA splicing, via transesterification reactions with bulged adenosine as nucleophile (GO:0000377)	251	13	4.64	2.8	0.00116	0.0462
	mitochondrion organization (GO:0007005)	192	11	3.55	3.1	0.00128	0.0479
Community 4	response to salt stress (GO:0009651)	622	26	3.11	8.37	1.67e-16	5.47e-14
	abscisic acid-activated signaling pathway (GO:0009738)	157	12	0.78	15.3	5.45e-11	1.6e-08
	response to desiccation (GO:0009269)	25	7	0.12	56.06	1.95e-10	5.46e-08
	cold acclimation (GO:0009631)	62	8	0.31	25.83	2.21e-09	5.9e-07
	negative regulation of abscisic acid-activated signaling pathway (GO:0009788)	58	5	0.29	17.26	1.57e-05	0.00237
	circadian rhythm (GO:0007623)	127	6	0.63	9.46	5.52e-05	0.00722
	leaf senescence (GO:0010150)	187	7	0.93	7.49	5.46e-05	0.0073
	peptidyl-threonine dephosphorylation (GO:0035970)	46	4	0.23	17.41	0.000113	0.0135
	regulation of seed germination (GO:0010029)	94	5	0.47	10.65	0.000139	0.0163
	response to fungus (GO:0009620)	995	15	4.97	3.02	0.000156	0.018
	response to wounding (GO:0009611)	815	13	4.07	3.19	0.000257	0.0286
	unsaturated fatty acid biosynthetic process (GO:0006636)	24	3	0.12	25.03	0.000322	0.0351
	response to high light intensity (GO:0009644)	63	4	0.31	12.71	0.000351	0.0362
	hyperosmotic response (GO:0006972)	70	4	0.35	11.44	0.000513	0.0458
	negative regulation of DNA-templated transcription initiation (GO:2000143)	5	2	0.02	80.09	0.000507	0.0466
	defense response to other organism (GO:0098542)	2116	23	10.57	2.18	0.000543	0.0477
Community 5	cellulose biosynthetic process (GO:0030244)	58	6	0.27	21.83	5.88e-07	9.88e-05
	cuticle development (GO:0042335)	34	5	0.16	31.03	1.09e-06	0.000169
	root morphogenesis (GO:0010015)	670	14	3.18	4.41	4.55e-06	0.000623
	anatomical structure maturation (GO:0071695)	333	10	1.58	6.34	5.56e-06	0.000744
	nucleotide-sugar metabolic process (GO:0009225)	53	5	0.25	19.91	8.1e-06	0.00106
	plant epidermis development (GO:0090558)	639	13	3.03	4.29	1.34e-05	0.00168
	plant-type primary cell wall biogenesis (GO:0009833)	28	4	0.13	30.14	1.53e-05	0.00188
	xyloglucan metabolic process (GO:0010411)	62	5	0.29	17.02	1.65e-05	0.00191
	unidimensional cell growth (GO:0009826)	362	9	1.72	5.25	6.94e-05	0.00729
	homogalacturonan biosynthetic process (GO:0010289)	3	2	0.01	> 100	0.000219	0.0198
	monocarboxylic acid metabolic process (GO:0032787)	655	11	3.1	3.54	0.000327	0.0275
	response to organic cyclic compound (GO:0014070)	817	12	3.87	3.1	0.000571	0.0448
Community 6	cellular response to hypoxia (GO:0071456)	239	16	1.03	15.56	1.82e-14	1.79e-11
	response to light intensity (GO:0009642)	373	13	1.6	8.1	1.21e-08	4.75e-06
	response to nutrient levels (GO:0031667)	272	11	1.17	9.4	4.01e-08	1.39e-05
	response to wounding (GO:0009611)	815	16	3.51	4.56	5.39e-07	0.000138
	response to organic cyclic compound (GO:0014070)	817	15	3.51	4.27	2.81e-06	0.000637
	response to oxidative stress (GO:0006979)	613	13	2.64	4.93	2.99e-06	0.000651
	cellular response to ethylene stimulus (GO:0071369)	96	6	0.41	14.53	5.23e-06	0.0011
	negative regulation of cytokinin-activated signaling pathway (GO:0080037)	6	3	0.03	> 100	6.32e-06	0.00128
	response to chitin (GO:0010200)	308	8	1.32	6.04	6.73e-05	0.0107
	protein ubiquitination (GO:0016567)	718	12	3.09	3.89	7.2e-05	0.0112
	hormone-mediated signaling pathway (GO:0009755)	930	13	4	3.25	0.000206	0.0258
	response to red or far red light (GO:0009639)	375	8	1.61	4.96	0.000251	0.0308
	regulation of phenylpropanoid metabolic process (GO:2000762)	29	3	0.12	24.05	0.000347	0.0417
	response to starvation (GO:0042594)	217	6	0.93	6.43	0.000408	0.0471
Community 8	response to oxidative stress (GO:0006979)	613	9	1.43	6.29	1.33e-05	0.0098
	phenylpropanoid metabolic process (GO:0009698)	118	5	0.28	18.16	1.02e-05	0.01
Community 9	response to salicylic acid (GO:0009751)	440	15	0.67	22.26	1.01e-16	5.94e-13
	regulation of salicylic acid mediated signaling pathway (GO:2000031)	33	4	0.05	79.16	3e-07	6.8e-05
	regulation of immune system process (GO:0002682)	179	6	0.27	21.89	3.69e-07	7.75e-05
	defense response to oomycetes (GO:0002229)	79	4	0.12	33.07	7.94e-06	0.00142
	protein autophosphorylation (GO:0046777)	176	5	0.27	18.55	8.2e-06	0.00142
	defense response to fungus (GO:0050832)	702	8	1.07	7.44	1.04e-05	0.0017
	systemic acquired resistance (GO:0009627)	116	4	0.18	22.52	3.41e-05	0.00478
	cellular response to organic cyclic compound (GO:0071407)	259	5	0.4	12.61	5.02e-05	0.00671
	recognition of pollen (GO:0048544)	51	3	0.08	38.42	7.81e-05	0.00999
	positive regulation of defense response to oomycetes (GO:1902290)	9	2	0.01	> 100	0.000124	0.0144
	cell surface receptor signaling pathway (GO:0007166)	61	3	0.09	32.12	0.00013	0.0147
	immune response (GO:0006955)	199	4	0.3	13.13	0.00026	0.0278
	negative regulation of leaf senescence (GO:1900056)	16	2	0.02	81.64	0.000344	0.0343
Community 10	positive regulation of anthocyanin biosynthetic process (GO:0031542)	4	2	0	> 100	8.35e-06	0.00273
	anthocyanin-containing compound biosynthetic process (GO:0009718)	26	7	0.02	> 100	2.11e-16	3.1e-13
	response to jasmonic acid (GO:0009753)	606	8	0.46	17.24	9.42e-09	6.93e-06
Community 11	icosanoid metabolic process (GO:0006690)	6	2	0	> 100	1.13e-05	0.0223
	jasmonic acid biosynthetic process (GO:0009695)	26	4	0.02	> 100	3.51e-09	2.07e-05
	jasmonic acid metabolic process (GO:0009694)	50	4	0.03	> 100	4.01e-08	0.000118
	monocarboxylic acid biosynthetic process (GO:0072330)	252	4	0.17	24.19	2.04e-05	0.03
	carboxylic acid biosynthetic process (GO:0046394)	596	5	0.39	12.78	3.35e-05	0.0394
Community 13	phragmoplast microtubule organization (GO:0080175)	4	2	0	> 100	1.01e-05	0.00348
	embryo sac cellularization (GO:0009558)	5	2	0	> 100	1.41e-05	0.00436
	male meiosis cytokinesis (GO:0007112)	6	2	0.01	> 100	1.87e-05	0.00552
	microtubule-based movement (GO:0007018)	60	7	0.05	> 100	8.87e-14	5.22e-10
	mitotic cytokinesis (GO:0000281)	42	3	0.04	85.19	7.12e-06	0.0028
	cytokinesis by cell plate formation (GO:0000911)	70	5	0.06	85.19	4.3e-09	5.07e-06
	spindle organization (GO:0007051)	67	3	0.06	53.4	2.71e-05	0.0076
Community 16	positive regulation of iron ion transport (GO:0034758)	2	2	0	> 100	1.91e-06	0.000432
	cellular response to iron ion starvation (GO:0010106)	8	5	0	> 100	4.32e-14	2.54e-10
	response to iron ion starvation (GO:1990641)	16	2	0.01	> 100	4.85e-05	0.00921
Community 163	glucosinolate biosynthetic process from homomethionine (GO:0033506)	3	2	0	> 100	2.79e-06	0.00041
	homoserine biosynthetic process (GO:0009090)	6	2	0	> 100	7.79e-06	0.00109
	leucine biosynthetic process (GO:0009098)	15	4	0.01	> 100	2.23e-10	5.25e-08
	threonine biosynthetic process (GO:0009088)	10	2	0.01	> 100	1.83e-05	0.00251
	lysine biosynthetic process via diaminopimelate (GO:0009089)	15	2	0.01	> 100	3.77e-05	0.00483
	response to insect (GO:0009625)	33	3	0.02	> 100	9.33e-07	0.000141

## Sheet: GO terms rice
	GO biological process complete	Ref list	Input genes	Expected	FE	P	adjusted P
Community 1	cell surface receptor signaling pathway (GO:0007166)	262	21	3.13	6.72	3.48e-11	6.8e-09
	regulation of defense response (GO:0031347)	96	11	1.15	9.6	6.18e-08	5.68e-06
	response to wounding (GO:0009611)	53	8	0.63	12.65	6.04e-07	5.05e-05
	regulation of jasmonic acid mediated signaling pathway (GO:2000022)	25	6	0.3	20.11	1.5e-06	0.000119
	hormone-mediated signaling pathway (GO:0009755)	441	17	5.26	3.23	3.9e-05	0.0025
	response to water deprivation (GO:0009414)	72	7	0.86	8.15	4.25e-05	0.00269
	cellular oxidant detoxification (GO:0098869)	213	11	2.54	4.33	8.08e-05	0.00492
	response to lipid (GO:0033993)	284	12	3.39	3.54	0.000236	0.0133
	defense response to bacterium (GO:0042742)	135	8	1.61	4.97	0.000314	0.0171
	regulation of salicylic acid biosynthetic process (GO:0080142)	24	4	0.29	13.97	0.000313	0.0172
	stomatal movement (GO:0010118)	10	3	0.12	25.14	0.000427	0.0225
	response to fungus (GO:0009620)	77	6	0.92	6.53	0.000458	0.0239
	response to oxidative stress (GO:0006979)	267	11	3.19	3.45	0.000519	0.0262
	hydrogen peroxide catabolic process (GO:0042744)	146	8	1.74	4.59	0.000515	0.0265
	exocytosis (GO:0006887)	80	6	0.95	6.28	0.000554	0.0276
	cellular response to oxygen-containing compound (GO:1901701)	236	10	2.82	3.55	0.000749	0.0366
	response to ethylene (GO:0009723)	86	6	1.03	5.85	0.000792	0.0379
	positive regulation of response to stimulus (GO:0048584)	86	6	1.03	5.85	0.000792	0.0383
	regulation of salicylic acid mediated signaling pathway (GO:2000031)	13	3	0.16	19.34	0.000814	0.0386
	MAPK cascade (GO:0000165)	32	4	0.38	10.47	0.000835	0.0391
Community 2	glutathione metabolic process (GO:0006749)	68	6	0.45	13.38	9.59e-06	0.0449
Community 3	photosynthesis (GO:0015979)	182	10	0.96	10.38	8.61e-08	0.000403
Community 4	photosynthesis, light harvesting (GO:0009765)	22	4	0.19	21.51	6.27e-05	0.0101
	translation (GO:0006412)	590	39	4.99	7.82	3.44e-22	1.61e-18
	positive regulation of protein metabolic process (GO:0051247)	124	7	1.05	6.68	0.000126	0.0179
	cellular oxidant detoxification (GO:0098869)	213	9	1.8	5	0.000119	0.0174
	ribosome biogenesis (GO:0042254)	355	11	3	3.67	0.0003	0.038
	ncRNA metabolic process (GO:0034660)	516	14	4.36	3.21	0.000181	0.0236
	RNA processing (GO:0006396)	797	19	6.74	2.82	7.28e-05	0.0114
Community 5	cytoplasmic translational elongation (GO:0002182)	6	2	0.01	> 100	8.96e-05	0.00875
	ribosomal large subunit assembly (GO:0000027)	29	5	0.05	95.28	4.51e-09	5.29e-07
	ribosomal small subunit assembly (GO:0000028)	27	4	0.05	81.87	2.99e-07	3.26e-05
	rRNA processing (GO:0006364)	259	6	0.47	12.8	8.97e-06	0.000914
Community 6	diterpene phytoalexin biosynthetic process (GO:0051502)	5	3	0	> 100	4.28e-08	7.16e-06
	tryptophan biosynthetic process (GO:0000162)	15	4	0.01	> 100	2.56e-09	7.05e-07
	gibberellin biosynthetic process (GO:0009686)	21	3	0.02	> 100	1.53e-06	0.000199
	regulation of protein serine/threonine phosphatase activity (GO:0080163)	24	3	0.02	> 100	2.21e-06	0.00028
	abscisic acid-activated signaling pathway (GO:0009738)	81	3	0.08	39.44	6.93e-05	0.00601
Community 7	carboxylic acid biosynthetic process (GO:0046394)	403	6	0.69	8.67	7.54e-05	0.0321
Community 12	iron ion homeostasis (GO:0055072)	42	3	0.02	> 100	9.79e-07	0.00459
