# Supplementary material for: Transcriptome-derived networks reconstruct distinct immune strategies under different iron availability between Arabidopsis and rice
Source: Research Square preprint supplement (doi:10.21203/rs.3.rs-3214423/v1), 2024-07-15
Supplement: Supplementary file 9 [file a68ef72a25976433db9e2f69.xlsx]

## Sheet: Fe availability
	Mock-treated									Infected
Gene ID	-Fe #1	-Fe #2	-Fe #3	suf #1	suf #2	suf #3	+Fe #1	+Fe #2	+Fe #3	-Fe #1	-Fe #2	-Fe #3	suf #1	suf #2	suf #3	+Fe #1	+Fe #2	+Fe #3	P	adjusted P
Os05g0181700	55.2932	4.38567	15.4111	16.0717	5.16033	4.05293	6.25793	0	7.41452	393.326	49.6791	91.1983	303.689	51.5547	92.3479	276.357	34.8276	66.1686	1.67469e-20	4.30061e-16
Os02g0736900	129.819	0	5.77915	2.67861	0	2.02646	6.25793	0	1.85363	139.631	8.27984	10.9877	86.9046	2.14811	10.7381	278.494	4.09737	9.34145	8.06084e-20	1.03501e-15
Os11g0210201	294.497	76.7491	26.0062	55.358	30.962	18.2382	18.7738	4.45132	11.1218	244.846	36.2243	74.7167	179.539	49.4066	60.1335	101.853	22.5355	31.1382	6.92685e-18	5.92939e-14
Os01g0627967	450.76	131.57	34.6749	161.61	89.4457	77.0056	129.331	91.252	65.8039	138.647	6.20988	13.1853	148.979	23.6292	12.8857	0.712261	0	0	4.72491e-16	2.42671e-12
Os02g0712700	259.638	164.462	132.92	197.325	102.347	87.1379	114.729	74.5596	69.5111	1013.8	314.634	501.041	786.917	247.033	295.298	616.818	195.649	242.099	4.64635e-16	2.42671e-12
Os02g0579000	1489.31	3255.26	927.554	401.792	902.197	628.204	143.932	230.356	161.266	853.518	451.251	276.891	262.624	591.805	212.615	88.3203	295.011	62.2763	9.93092e-16	3.64323e-12
Os08g0444440	143.041	67.9778	41.4173	67.8582	27.5217	30.397	16.6878	8.90264	7.41452	24.5829	6.20988	8.7902	15.2799	4.29622	4.29525	8.54713	4.09737	1.55691	9.4783e-16	3.64323e-12
Os02g0755900	1111.87	967.039	183.006	1273.23	192.652	100.31	187.738	190.294	162.193	1451.37	577.519	142.841	243.524	175.071	64.4287	129.631	94.2395	40.4796	1.06768e-14	3.42724e-11
Os08g0155900	718.812	120.606	71.2762	194.646	98.0462	56.741	103.256	75.6724	75.9988	259.595	10.3498	35.1608	308.464	36.5179	23.6239	18.5188	0	3.11382	3.19306e-14	9.11085e-11
Os12g0136500	2051.86	1158.91	1103.82	3017.01	1711.51	1516.81	1317.3	1013.79	873.987	4036.51	2342.16	2813.96	4349.05	2911.77	2294.74	4800.64	1847.91	2491.05	4.15424e-14	1.06681e-10
Os07g0114000	421.911	65.785	65.4971	117.859	67.0843	46.6087	50.0635	37.8362	27.8045	477.891	134.547	142.841	375.313	122.442	201.877	394.592	166.968	118.325	1.05261e-13	2.45738e-10
Os10g0527400	700.782	317.961	100.172	370.542	278.658	181.369	254.489	269.305	178.875	507.391	63.1338	46.1485	623.612	56.925	51.543	25.6414	4.09737	6.22763	1.14852e-13	2.45783e-10
Os10g0528300	1086.63	336.6	93.4296	458.043	227.054	143.879	229.458	117.96	103.803	456.258	110.743	74.7167	949.266	428.548	111.676	94.0184	8.19474	42.815	1.43651e-13	2.83766e-10
Os01g0695800	443.548	142.534	89.5768	195.539	107.507	117.535	69.8803	55.6415	45.4139	519.191	73.4836	197.779	263.579	103.109	126.71	146.013	48.1441	50.5995	3.66133e-13	6.71592e-10
Os12g0608500	57.6973	32.8925	16.3743	41.0721	15.481	14.1852	12.5159	15.5796	7.41452	40.3159	12.4198	10.9877	42.0198	13.9627	11.8119	1.42452	0	1.55691	6.20082e-13	1.06158e-09
Os09g0130300	982.056	2432.95	1043.14	223.218	1486.17	687.984	86.5681	180.278	95.462	1445.47	709.997	471.374	408.738	890.393	486.437	115.386	452.759	140.9	6.87426e-13	1.10332e-09
Os02g0629000	186.314	48.2423	25.043	153.574	43.0027	46.6087	20.8598	10.0155	18.5363	258.612	80.7285	96.6922	269.309	135.331	53.6906	255.702	40.9737	68.504	9.99093e-13	1.42905e-09
Os08g0508000	284.88	289.454	36.6013	1062.52	50.7432	46.6087	35.4616	52.303	48.1944	1272.41	253.57	158.224	164.259	33.2957	22.5501	58.4054	16.3895	20.2398	1.00167e-12	1.42905e-09
Os05g0592300	561.347	1370.52	707.946	276.79	711.265	412.385	134.546	214.776	220.582	352.027	404.677	283.484	190.999	513.399	236.239	96.1552	502.952	146.349	1.75378e-12	2.26992e-09
Os07g0638400	1026.53	350.853	67.4234	519.651	119.548	80.0453	113.686	150.232	101.023	584.089	97.2882	18.6792	301.779	30.0736	45.1001	41.3111	6.14605	10.8984	1.82429e-12	2.26992e-09
Os08g0156000	266.85	43.8567	23.1166	172.324	36.9824	36.4764	50.0635	71.2211	25.9508	142.581	22.7696	20.8767	168.079	45.1104	18.2548	34.9008	5.12171	8.563	1.85624e-12	2.26992e-09
Os12g0428000	1176.78	669.91	378.534	673.225	477.33	303.97	147.061	211.438	118.632	767.969	425.377	303.262	676.137	453.252	259.863	470.804	146.481	261.561	2.78289e-12	3.22571e-09
Os02g0575000	912.338	194.066	73.2026	175.003	137.609	69.913	62.5793	56.7543	63.0234	308.761	94.1832	76.9142	360.989	118.146	69.7978	52.7073	56.3388	18.6829	2.88907e-12	3.22571e-09
Os03g0197300	188.718	38.3746	33.7117	104.466	47.303	43.569	41.7196	23.3694	12.0486	161.264	18.6296	3.29632	106.005	46.1844	21.4762	9.97165	6.14605	3.89227	4.13688e-12	4.42647e-09
Os12g0106000	1012.11	2008.63	1665.36	3484.88	1801.81	2521.93	6677.22	9599.27	12411.9	1939.1	1476.92	1849.24	2329.24	1636.86	2570.71	4170.29	1867.38	2470.81	4.9773e-12	5.11268e-09
Os03g0322900	1643.17	1382.58	462.332	192.86	591.718	425.557	30.2467	133.54	20.3899	220.263	464.706	64.8277	199.594	678.804	126.71	11.3962	278.621	17.126	6.34358e-12	6.04656e-09
Os05g0247800	2.40405	4.38567	0.963192	228.575	9.4606	4.05293	4.17196	5.56415	1.85363	260.579	81.7635	2.19755	1.90999	5.37028	2.14762	0.712261	3.07303	0.778454	6.35736e-12	6.04656e-09
Os05g0542500	2822.36	317.961	102.098	4469.71	13.7609	235.07	2.08598	4.45132	0	3278.37	8.27984	15.3828	13.3699	12.8887	4.29525	4.27356	0	0	6.70604e-12	6.1504e-09
Os03g0305600	1317.42	66.8814	53.9387	419.65	29.2419	51.6748	47.9775	10.0155	22.2436	176.997	10.3498	0	8.59496	8.59245	4.29525	4.98582	3.07303	3.11382	9.70353e-12	8.59264e-09
Os03g0820500	6823.91	1402.32	628.001	2335.75	613.219	639.349	312.897	708.872	338.287	858.434	99.3581	41.7534	175.719	65.5174	42.9525	37.7498	53.2658	10.8984	1.39589e-11	1.19488e-08
Os01g0800900	489.225	349.757	57.7915	15.1788	108.367	69.913	2.08598	4.45132	1.85363	91.4483	37.2593	29.6669	21.0099	65.5174	23.6239	4.27356	23.5599	4.67073	1.54705e-11	1.28156e-08
Os05g0349800	140.637	335.503	35.6381	3.57149	77.4049	6.07939	0	0	0	5.89989	6.20988	4.3951	1.90999	12.8887	6.44287	1.42452	0	0	1.9095e-11	1.53237e-08
Os01g0218100	824.591	646.886	171.448	600.01	363.803	243.176	151.233	235.92	152.924	482.808	164.562	117.569	320.879	81.6283	93.4217	58.4054	34.8276	34.252	3.7783e-11	2.85373e-08
Os04g0511200	982.056	522.991	108.841	1040.2	87.7256	200.62	87.6111	91.252	83.4134	852.535	188.366	31.8645	127.014	41.8882	30.0667	27.7782	32.779	18.6829	3.76781e-11	2.85373e-08
Os03g0734100	337.77	76.7491	46.2332	605.367	18.9212	12.1588	12.5159	17.8053	7.41452	732.57	311.529	85.7044	30.5599	19.333	36.5096	55.5563	10.2434	23.3536	4.21471e-11	3.0924e-08
Os01g0609900	316.133	148.016	65.4971	595.545	73.9647	111.456	120.987	38.949	48.1944	1937.13	495.756	1126.24	673.272	300.736	632.476	698.728	296.035	354.975	5.2286e-11	3.72973e-08
Os03g0287100	420.709	257.658	174.338	287.505	243.395	140.839	127.245	162.473	100.096	166.18	89.0083	59.3338	110.78	62.2953	55.8382	39.1743	44.0467	31.9166	5.46424e-11	3.79248e-08
Os05g0381400	102.172	154.595	40.4541	67.8582	25.8016	36.4764	4.17196	4.45132	0	46.2158	24.8395	6.59265	3.81998	19.333	2.14762	0	4.09737	0	5.92004e-11	4.0007e-08
Os01g0962100	2101.14	479.134	158.927	576.795	239.955	245.202	133.503	133.54	103.803	240.912	110.743	86.8032	148.979	118.146	85.905	128.919	73.7527	52.1564	6.4766e-11	4.26459e-08
Os02g0703600	43.273	0	1.92638	3.57149	0	1.01323	4.17196	0	5.56089	60.9656	3.10494	2.19755	60.1648	3.22217	5.36906	210.829	4.09737	5.44918	7.83329e-11	5.02897e-08
Os07g0442900	306.517	252.176	44.3068	123.216	63.644	28.3705	33.3756	24.4822	27.8045	484.775	260.815	348.312	190.999	152.516	175.031	113.962	41.998	58.3841	9.97031e-11	6.24482e-08
Os05g0468800	597.407	47.1459	19.2638	423.221	18.9212	55.7278	7.30092	4.45132	1.85363	190.763	0	0	7.63997	4.29622	2.14762	4.27356	0	2.33536	1.23775e-10	7.56798e-08
Os01g0159000	347.386	57.0137	11.5583	18.7503	5.16033	13.172	0	0	1.85363	11.7998	8.27984	13.1853	11.46	2.14811	4.29525	2.84904	0	1.55691	1.29427e-10	7.72949e-08
Os03g0180900	424.316	323.443	70.313	438.4	65.3642	96.257	70.9233	53.4158	31.5117	779.769	172.842	361.497	175.719	77.332	125.636	141.74	30.7303	70.0609	1.58672e-10	9.26066e-08
Os08g0412800	173.092	85.5205	5.77915	183.039	18.9212	24.3176	8.34391	17.8053	5.56089	212.396	28.9795	51.6424	19.0999	2.14811	2.14762	34.1885	8.19474	9.34145	1.64666e-10	9.39696e-08
Os11g0181200	163.476	10.9642	5.77915	168.753	5.16033	4.05293	0	2.22566	0	53.099	0	2.19755	1.90999	0	2.14762	1.42452	0	0	1.73907e-10	9.70854e-08
Os03g0379300	1485.71	2215.86	1791.54	556.259	1584.22	1196.63	289.951	646.554	358.677	1162.28	1284.41	763.648	544.348	1402.72	866.567	135.33	941.371	321.502	2.30154e-10	1.25752e-07
Os03g0293700	141.839	558.076	119.436	13.3931	200.393	72.9527	2.08598	13.354	0	119.964	110.743	47.2473	23.8749	191.182	50.4692	0	41.998	0	2.36001e-10	1.2626e-07
Os11g0106700	1137.12	1786.06	1733.75	4211.67	1781.17	2555.37	6197.44	9228.69	10792.8	2107.25	1529.7	2246.99	2407.55	1881.75	2758.62	5193.81	1852.01	2948.78	3.40588e-10	1.78496e-07
Os03g0609500	1122.69	605.222	644.375	825.906	764.589	481.285	347.315	464.05	210.387	330.394	273.235	196.681	503.283	376.994	257.715	316.956	170.041	172.038	3.47618e-10	1.78537e-07
Os01g0655500	9780.89	25717.5	15439	5000.08	14554.7	9755.4	2919.33	4117.47	3357.85	13945.4	11720.1	6400.36	6081.42	14164.7	6838.04	2720.12	11194	3401.07	4.12133e-10	2.07521e-07
Os05g0519300	1304.2	1297.06	515.308	280.362	719.006	523.841	110.557	164.699	166.827	382.51	344.648	138.446	251.164	568.176	180.4	113.962	263.256	106.648	4.51962e-10	2.232e-07
Os08g0412700	397.871	245.597	44.3068	255.361	48.1631	63.8336	64.6653	68.9954	74.1452	243.862	68.3087	17.5804	45.8398	17.1849	17.181	25.6414	4.09737	4.67073	4.76824e-10	2.31035e-07
Os04g0282400	6077.45	7786.75	2284.69	1125.91	3830.68	1810.65	631.008	870.233	605.21	2005.96	783.48	414.238	617.882	1020.35	444.558	254.989	677.09	213.296	5.39613e-10	2.56616e-07
Os02g0540700	379.841	63.5922	42.3804	108.037	46.443	57.7542	88.6541	43.4003	97.3156	696.187	42.4342	40.6547	758.267	64.4434	49.3954	3174.55	57.3632	69.2824	7.21275e-10	3.30756e-07
Os04g0677300	476.003	50.4352	19.2638	127.681	1.72011	34.4499	18.7738	11.1283	22.2436	190.763	28.9795	32.9632	63.0297	4.29622	15.0334	25.6414	2.04868	18.6829	7.1525e-10	3.30756e-07
Os01g0689451	1557.83	27699.9	6727.9	1933.96	10630.3	3409.53	1395.52	1241.92	1412.47	7071.02	7884.48	3493	2902.23	9527.95	3512.44	1297.03	3896.6	1324.15	1.02322e-09	4.60988e-07
Os05g0201700	286.082	126.088	479.67	63.3939	118.688	204.673	457.872	743.37	742.379	111.115	359.138	228.545	246.389	415.66	458.518	348.295	830.742	748.873	1.19804e-09	5.21453e-07
Os08g0276100	1163.56	1597.48	1665.36	971.444	1536.92	1442.84	1332.94	1749.37	1607.1	1155.4	2176.56	1686.62	1163.19	2038.56	1865.21	1230.07	1931.91	1581.04	1.18641e-09	5.21453e-07
Os02g0139000	533.7	430.892	224.424	634.832	271.777	145.905	184.609	175.827	195.558	589.006	303.249	75.8154	240.659	54.7769	70.8716	64.8157	52.2415	38.9227	1.25497e-09	5.37128e-07
Os01g0192000	1246.5	742.274	356.381	369.649	350.042	334.367	318.112	308.254	188.143	660.788	447.112	384.571	506.148	408.141	373.687	539.894	331.887	330.065	1.34003e-09	5.62413e-07
Os01g0595600	100.97	142.534	48.1596	54.4652	70.5245	54.7145	31.2897	57.8671	31.5117	97.3482	77.6235	63.7289	23.8749	30.0736	21.4762	25.6414	18.4382	20.2398	1.37691e-09	5.62413e-07
Os09g0442400	715.206	362.914	193.602	450.9	300.159	207.713	144.975	204.761	139.949	360.877	43.4692	53.84	470.813	183.664	97.7169	45.5847	36.8763	30.3597	1.37975e-09	5.62413e-07
Os01g0841700	26.4446	14.2534	17.3375	17.8574	6.88044	8.10586	25.0317	2.22566	12.9754	571.306	42.4342	123.063	272.174	19.333	82.6836	330.489	20.4868	38.1443	1.4665e-09	5.88433e-07
Os01g0558100	1322.23	116.22	30.8221	187.503	51.6033	54.7145	41.7196	33.3849	27.8045	290.078	65.2038	98.8897	65.8947	40.8141	97.7169	61.2544	12.2921	30.3597	1.69071e-09	6.65153e-07
Os01g0864500	459.174	83.3276	36.6013	54.4652	33.5421	20.2646	26.0747	44.5132	27.8045	929.233	95.2182	183.495	352.394	55.8509	127.784	563.398	50.1928	59.1625	1.7095e-09	6.65153e-07
Os03g0718800	484.417	416.638	133.884	362.506	111.807	151.985	84.4821	80.1237	57.4625	176.013	32.0844	21.9755	97.4096	74.1099	30.0667	46.2969	32.779	13.2337	2.47133e-09	9.4722e-07
Os12g0236100	4766.04	45436.6	17324.9	3016.12	27054.7	9741.21	1098.27	1486.74	1123.3	23630.1	11036	6700.33	5448.25	12171.2	6236.7	464.394	6832.36	913.905	2.60763e-09	9.84765e-07
Os12g0464400	26.4446	2.19283	1.92638	91.0729	3.44022	2.02646	0	0	0	131.764	0	4.3951	0	0	0	0	0	0	2.85745e-09	1.06347e-06
Os05g0115100	222.375	166.655	63.5707	333.934	88.5856	90.1776	63.6223	65.6569	52.8285	368.743	167.667	102.186	147.069	71.9618	54.7644	62.6789	55.3145	63.8332	3.13281e-09	1.14929e-06
Os04g0627900	33.6568	24.1212	7.70554	23.2147	32.6821	8.10586	22.9458	8.90264	7.41452	71.782	10.3498	16.4816	29.6049	3.22217	10.7381	0	0	0	3.25252e-09	1.1764e-06
Os10g0492900	3731.09	2976.77	1403.37	3202.73	1505.1	1122.66	907.4	1064.98	778.525	2002.03	529.91	320.842	588.278	484.399	428.451	706.563	277.597	222.638	3.57785e-09	1.2761e-06
Os03g0285200	211.557	92.099	58.7547	50.0008	45.5829	52.6881	64.6653	40.0619	39.853	233.046	77.6235	54.9387	178.584	68.7396	53.6906	156.697	53.2658	50.5995	3.70825e-09	1.30449e-06
Os08g0386200	387.053	37.2782	53.9387	80.3584	46.443	56.741	75.0952	26.7079	90.8279	989.215	193.541	312.052	1045.72	123.516	326.439	762.831	181.309	148.685	4.31639e-09	1.4979e-06
Os04g0684900	121.405	17.5427	20.227	21.4289	6.88044	8.10586	27.1177	33.3849	72.2916	1092.46	187.331	343.916	902.471	166.479	233.017	1971.54	215.112	280.244	4.47248e-09	1.53138e-06
Os01g0155800	161.072	42.7602	11.5583	182.146	3.44022	2.02646	7.30092	6.67698	7.41452	364.81	4.13992	2.19755	19.0999	0	4.29525	7.83487	0	3.11382	4.6933e-09	1.58584e-06
Os03g0841600	158.668	156.788	40.4541	121.431	73.1046	64.8468	43.8055	72.3339	48.1944	273.362	64.1688	71.4203	262.624	63.3693	49.3954	29.2027	16.3895	9.34145	5.09242e-09	1.69836e-06
Os01g0734800	1349.88	510.93	348.675	566.081	479.911	384.015	501.678	347.203	372.58	897.767	253.57	512.029	913.931	409.215	535.832	300.574	200.771	175.931	5.16279e-09	1.69975e-06
Os10g0562100	2374	4426.23	2951.22	2412.54	3442.8	2700.26	2243.47	2660.78	2393.96	1383.52	1717.03	1392.15	1564.28	2196.44	1651.52	1037.76	1726.02	1031.45	5.73779e-09	1.86515e-06
Os03g0826800	1151.54	146.92	26.9694	626.796	59.3438	54.7145	45.8915	33.3849	27.8045	648.988	131.443	223.051	434.523	191.182	224.427	275.645	147.505	149.463	6.61702e-09	2.12406e-06
Os10g0491000	2770.67	2686.22	679.05	2389.32	404.226	658.601	584.074	799.012	510.675	4320.69	507.14	529.609	629.342	162.182	269.527	201.57	157.749	224.195	7.04938e-09	2.20535e-06
Os05g0438800	1316.22	1384.77	785.965	925.015	717.286	690.011	420.325	533.045	477.31	1048.21	373.628	391.164	426.883	394.179	301.741	259.263	205.893	169.703	7.03796e-09	2.20535e-06
Os08g0558100	971.238	621.668	224.424	453.579	220.174	258.374	221.114	220.34	186.29	453.308	275.305	191.187	285.544	141.775	154.629	272.084	219.209	130.002	7.12787e-09	2.20535e-06
Os03g0664800	271.658	24.1212	12.5215	79.4656	19.7813	22.2911	11.4729	6.67698	9.26815	577.206	128.338	343.916	297.004	158.96	286.708	416.673	154.676	178.266	7.29206e-09	2.22929e-06
Os02g0542400	270.456	127.184	253.319	265.183	215.014	312.075	394.25	418.424	529.211	217.313	182.157	348.312	357.169	307.18	386.572	401.715	361.593	456.953	7.54274e-09	2.27879e-06
Os12g0236200	57.6973	710.478	199.381	44.6436	371.544	128.68	2.08598	11.1283	10.195	255.662	120.058	90.0995	45.8398	139.627	71.9454	0	66.5823	10.1199	7.87909e-09	2.35273e-06
Os09g0522200	288.486	5.48208	12.5215	36.6077	9.4606	13.172	17.7308	16.6924	59.3162	457.242	57.9589	51.6424	571.088	50.4806	70.8716	876.793	54.2902	65.3902	1.09017e-08	3.21787e-06
Os03g0654700	176.698	21.9283	5.77915	35.7149	5.16033	8.10586	8.34391	22.2566	3.70726	33.4327	16.5597	2.19755	17.1899	6.44434	0	1.42452	0	0	1.18385e-08	3.4547e-06
Os12g0478200	1153.95	275.201	98.2456	516.973	89.4457	95.2438	78.2242	71.2211	46.3408	262.545	62.0988	105.482	128.924	124.591	85.905	74.0751	63.5092	52.9349	1.24479e-08	3.59172e-06
Os01g0638000	213.961	254.369	83.7977	215.182	73.9647	83.085	88.6541	105.719	70.4379	394.309	19.6646	28.5681	710.517	51.5547	30.0667	6.41035	4.09737	6.22763	1.44268e-08	4.11374e-06
Os09g0286600	847.429	322.346	640.523	1010.73	654.502	980.809	2125.61	1582.44	2109.43	2127.89	2437.38	4139.08	2866.9	3576.61	3817.4	4389.66	4492.77	5302.05	1.45775e-08	4.11374e-06
Os05g0551000	545.72	5438.23	1320.54	414.292	2370.31	658.601	270.134	243.71	320.678	2022.68	1503.83	798.809	543.393	1941.89	647.509	478.639	1109.36	438.27	1.65687e-08	4.62482e-06
Os06g0133500	112.991	31.7961	15.4111	16.0717	10.3207	6.07939	14.6018	15.5796	11.1218	51.1324	23.8045	20.8767	40.1098	15.0368	21.4762	44.1602	13.3165	12.4553	1.72402e-08	4.76053e-06
Os06g0697200	294.497	94.2918	49.1228	364.292	43.8628	63.8336	25.0317	58.98	24.0972	214.363	14.4897	24.173	70.6697	36.5179	17.181	18.5188	4.09737	9.34145	1.79544e-08	4.905e-06
Os05g0170200	138.233	30.6997	9.63192	74.1083	17.2011	38.5028	4.17196	6.67698	1.85363	87.5151	45.5391	63.7289	61.1197	42.9622	38.6572	26.3536	10.2434	15.5691	1.84963e-08	4.99985e-06
Os09g0491740	1756.16	1415.47	223.461	1558.95	448.949	354.631	217.985	191.407	164.973	1646.07	440.902	636.19	1022.8	631.545	601.335	349.72	238.672	299.705	2.14283e-08	5.73206e-06
Os01g0160800	129.819	297.129	9.63192	824.12	18.9212	46.6087	21.9028	31.1592	13.9022	872.201	61.0638	37.3583	21.0099	15.0368	16.1072	43.4479	18.4382	10.8984	2.24014e-08	5.93059e-06
Os03g0663400	2970.21	355.239	117.509	2298.25	84.2854	124.628	37.5476	66.7698	20.3899	3114.16	273.235	90.0995	84.9947	74.1099	131.005	133.193	75.8013	89.5222	2.30527e-08	6.04074e-06
Os04g0600200	706.792	652.368	249.467	1133.95	407.666	357.671	313.94	262.628	222.436	1450.39	173.877	197.779	731.527	199.774	166.441	215.815	137.262	139.343	2.41536e-08	6.26529e-06
Os01g0871500	15714.1	14692	10391.9	5081.33	11488.6	8123.08	2372.8	3911.6	2076.99	7044.47	7449.79	4664.3	3650	7835.24	4150.28	695.166	5805.97	1549.9	2.6158e-08	6.71736e-06
Os03g0439700	17299.6	17619.4	9688.75	3955.42	10782.5	6352.96	2549.07	5338.24	3557.12	8098.59	6630.08	4154.47	3776.05	8048.98	4963.16	2042.76	7038.26	2554.11	2.83256e-08	7.20199e-06
Os01g0954500	550.528	491.195	95.356	488.401	246.836	146.919	137.675	105.719	97.3156	630.305	204.926	170.31	212.009	148.22	133.153	84.759	74.777	87.1869	2.89273e-08	7.28288e-06
Os11g0592000	409.891	271.911	32.7485	600.01	27.5217	18.2382	27.1177	35.6105	16.6827	830.902	480.231	70.3216	58.2548	23.6292	34.362	29.9149	45.0711	45.9288	3.00922e-08	7.50259e-06
Os03g0790500	121.405	43.8567	7.70554	116.073	8.60055	10.1323	20.8598	22.2566	18.5363	208.463	39.3293	52.7412	57.2998	12.8887	12.8857	41.3111	22.5355	7.78454	3.57047e-08	8.81631e-06
Os03g0796600	2186.49	3099.57	3337.46	1635.74	2677.35	2493.56	2706.56	3212.74	2966.74	993.149	1606.29	1267.99	1037.13	1541.27	1583.87	917.392	1397.2	1456.49	4.03206e-08	9.86127e-06
Os12g0592900	70.9196	6.5785	7.70554	18.7503	0	14.1852	6.25793	0	7.41452	236.979	39.3293	90.0995	212.964	66.5915	73.0192	377.498	72.7283	137.008	5.31461e-08	1.27551e-05
Os03g0179700	43.273	32.8925	17.3375	17.8574	5.16033	4.05293	6.25793	6.67698	3.70726	31.4661	52.784	26.3706	15.2799	8.59245	5.36906	18.5188	10.2434	10.1199	5.31111e-08	1.27551e-05
Os08g0523200	86.5459	37.2782	11.5583	35.7149	25.8016	19.2514	13.5589	18.9181	14.829	10.8165	0	5.49387	60.1648	18.259	4.29525	0	0	0	5.99498e-08	1.42547e-05
Os07g0142200	7015.03	8610.16	3237.29	747.333	3741.24	1850.16	480.818	505.225	529.211	4789.73	1339.26	1493.23	763.042	2132	1499.04	475.79	1628.7	407.91	6.05477e-08	1.42648e-05
Os03g0128800	1835.5	2962.52	2417.61	1522.35	2281.73	1677.91	1599.95	2514.99	2339.28	1197.68	1612.5	1459.17	999.881	1845.23	1700.92	1336.91	2401.06	1447.92	6.14654e-08	1.43494e-05
Os04g0339400	393.063	803.673	207.086	773.227	391.325	424.544	312.897	366.121	250.24	1110.16	35.1893	51.6424	1484.06	292.143	133.153	57.6931	6.14605	7.78454	6.42632e-08	1.48674e-05
Os05g0119200	2737.02	699.514	282.215	603.581	343.162	155.024	196.082	292.674	225.216	708.97	231.836	239.533	377.223	225.552	298.52	272.084	151.603	158.805	7.00891e-08	1.60704e-05
Os05g0461350	162.274	63.5922	47.1964	58.0366	45.5829	36.4764	22.9458	32.2721	19.4631	50.1491	47.6091	24.173	58.2548	64.4434	45.1001	30.6272	28.6816	14.0122	7.39105e-08	1.67966e-05
Os11g0700900	284.88	105.256	11.5583	486.615	45.5829	16.2117	18.7738	13.354	5.56089	1109.18	134.547	234.039	205.324	151.442	120.267	207.98	35.852	155.691	7.78824e-08	1.7544e-05
Os03g0750000	70.9196	17.5427	1.92638	16.0717	8.60055	2.02646	6.25793	6.67698	0	25.5662	2.06996	2.19755	3.81998	6.44434	0	1.42452	0	0	8.32033e-08	1.85797e-05
Os05g0198400	127.415	121.702	102.098	163.395	86.8655	126.654	232.587	265.966	267.85	127.831	103.498	176.903	196.729	259.922	216.91	404.564	338.033	281.8	8.40011e-08	1.85961e-05
Os09g0483400	325.749	69.0742	35.6381	76.7869	70.5245	33.4367	29.2037	48.9645	22.2436	121.931	15.5247	3.29632	90.7246	15.0368	12.8857	0	0	2.33536	8.52177e-08	1.87042e-05
Os12g0258700	105.778	223.669	26.9694	139.288	61.0639	30.397	70.9233	33.3849	50.048	344.16	1043.26	364.793	127.014	74.1099	73.0192	75.4996	38.925	59.1625	9.22088e-08	2.00671e-05
Os09g0484900	135.829	53.7244	20.227	86.6085	57.6237	51.6748	54.2354	38.949	13.9022	106.198	54.854	19.7779	101.23	49.4066	24.6977	109.688	21.5112	31.1382	9.56983e-08	2.06515e-05
Os03g0676400	13.2223	2.19283	5.77915	12.5002	1.72011	4.05293	8.34391	4.45132	3.70726	172.08	42.4342	45.0498	123.194	19.333	40.8049	145.301	18.4382	10.8984	1.00027e-07	2.14057e-05
Os03g0693800	9.61622	2.19283	0	83.9299	0	2.02646	0	0	0	248.779	20.6996	2.19755	7.63997	0	0	0	0	1.55691	1.04024e-07	2.20772e-05
Os09g0110300	492.831	866.169	192.638	685.725	317.36	222.911	142.889	218.115	160.339	628.339	235.976	116.47	475.588	237.366	114.898	85.4713	118.824	56.0487	1.10094e-07	2.3174e-05
Os01g0959750	1696.06	253.272	244.651	443.757	271.777	265.467	177.308	273.756	179.802	403.159	101.428	113.174	268.354	75.1839	124.562	160.259	63.5092	45.1503	1.12694e-07	2.35283e-05
Os06g0294950	123.809	122.799	26.9694	0	46.443	6.07939	0	0	0	35.3994	21.7346	13.1853	1.90999	23.6292	8.5905	0	4.09737	0	1.15977e-07	2.40185e-05
Os05g0138300	15306.6	5812.1	2857.79	5712.59	2956.01	1945.41	2069.29	2054.28	2215.09	6973.67	3474.43	4068.76	4119.85	3420.87	3974.18	5275.72	2910.16	2983.82	1.30027e-07	2.67127e-05
Os05g0215300	191.122	546.015	327.485	244.647	340.582	220.885	240.93	290.448	205.753	111.115	189.401	116.47	128.924	270.662	154.629	86.1835	184.382	93.4145	1.38148e-07	2.81558e-05
Os01g0944900	209.153	57.0137	35.6381	198.217	57.6237	18.2382	36.5046	36.7234	14.829	198.63	39.3293	48.3461	30.5599	27.9255	46.1739	38.4621	17.4138	8.563	1.53834e-07	3.11059e-05
Os01g0196300	61.3034	4.38567	1.92638	3.57149	0	4.05293	4.17196	0	1.85363	82.5985	26.9095	169.211	26.7399	6.44434	49.3954	29.9149	2.04868	40.4796	1.63915e-07	3.28854e-05
Os11g0454300	2971.41	709.381	428.62	8607.28	86.0055	595.78	35.4616	50.0773	29.6581	4484.9	14.4897	28.5681	24.8299	42.9622	23.6239	14.2452	12.2921	30.3597	1.69408e-07	3.3724e-05
Os07g0622700	331.759	380.456	275.473	108.93	276.078	274.586	64.6653	33.3849	61.1698	196.663	146.967	72.5191	107.915	148.22	71.9454	22.0801	65.5579	35.8089	1.7537e-07	3.46424e-05
Os01g0297200	62.5054	13.157	5.77915	12.5002	4.30027	4.05293	2.08598	0	0.926815	87.5151	12.4198	43.951	39.1548	25.7773	55.8382	24.2169	16.3895	15.5691	1.94708e-07	3.81687e-05
Os01g0256500	49582.4	9397.39	3794.98	8822.46	5096.68	4944.57	2500.04	3095.89	3026.98	10855.8	5882.83	5674.07	7655.25	6660.22	5755.63	8332.74	6182.93	4583.54	2.01595e-07	3.92193e-05
Os03g0765400	1286.17	387.035	421.878	932.158	412.826	609.966	411.981	360.557	355.897	1296.01	683.087	759.253	1463.05	977.391	714.085	1148.16	524.463	735.639	2.08368e-07	4.02323e-05
Os04g0244800	15021.7	4170.77	2372.34	3226.84	3048.03	2380.08	1390.3	2167.79	1532.03	1306.83	620.988	359.299	1056.23	1151.39	641.066	798.444	644.311	326.172	2.24244e-07	4.29745e-05
Os01g0693400	1383.53	979.1	516.271	978.587	559.896	673.799	663.341	566.43	480.09	2430.76	728.626	565.869	1713.26	877.504	696.904	1883.93	850.204	577.613	2.34535e-07	4.42858e-05
Os01g0796000	167.082	30.6997	11.5583	6.2501	3.44022	12.1588	2.08598	2.22566	9.26815	346.127	53.819	286.78	168.079	119.22	244.829	574.082	143.408	158.805	2.33723e-07	4.42858e-05
Os03g0638400	36.0608	424.313	7.70554	64.2867	5.16033	2.02646	6.25793	8.90264	0	86.5318	39.3293	8.7902	7.63997	10.7406	2.14762	13.533	8.19474	7.78454	2.4001e-07	4.49888e-05
Os04g0578600	881.086	2180.77	988.235	247.325	1048.41	379.962	85.5251	198.084	97.3156	443.475	494.721	208.767	183.359	590.731	298.52	5.69809	332.911	148.685	2.45787e-07	4.57378e-05
Os07g0673900	147.849	62.4957	22.1534	100.002	31.822	34.4499	37.5476	40.0619	31.5117	175.03	57.9589	57.1363	86.9046	33.2957	37.5834	76.9242	38.925	37.3658	2.7049e-07	4.99725e-05
Os03g0694000	548.124	661.139	256.209	585.724	285.538	171.236	150.19	184.73	164.973	773.869	310.494	81.3093	74.4897	163.257	104.16	106.839	88.0935	38.9227	2.73795e-07	5.02218e-05
Os03g0286900	1246.5	130.474	47.1964	504.472	61.0639	89.1644	71.9662	53.4158	58.3893	294.995	25.8745	24.173	80.2197	39.7401	40.8049	8.54713	26.6329	12.4553	2.85421e-07	5.19831e-05
Os10g0160600	332.961	575.619	336.154	110.716	373.264	273.573	96.998	143.555	79.7061	235.012	222.521	90.0995	156.619	193.33	136.374	60.5422	138.286	89.5222	3.01507e-07	5.41447e-05
Os07g0639400	48.0811	67.9778	31.7853	93.7515	64.5041	57.7542	30.2467	28.9336	28.7313	24.5829	2.06996	6.59265	70.6697	30.0736	7.51669	2.84904	2.04868	0	3.00702e-07	5.41447e-05
Os02g0740500	215.163	75.6527	42.3804	139.288	49.8832	36.4764	35.4616	51.1902	38.9262	111.115	26.9095	17.5804	26.7399	15.0368	12.8857	1.42452	9.21908	3.11382	3.12725e-07	5.53847e-05
Os03g0307200	1740.54	2976.77	108.841	89.2871	451.529	172.249	1.04299	37.8362	1.85363	1063.95	8.27984	13.1853	19.0999	2.14811	5.36906	1.42452	4.09737	0	3.1259e-07	5.53847e-05
Os03g0604566	1578.26	582.197	243.688	650.903	339.722	290.798	119.944	252.612	102.876	259.595	40.3642	65.9265	125.104	71.9618	76.2407	67.6648	47.1198	33.4735	3.41838e-07	6.0126e-05
Os01g0615050	269.254	192.969	20.227	315.184	29.2419	42.5557	10.4299	6.67698	19.4631	538.857	184.227	313.151	124.149	32.2217	127.784	46.2969	18.4382	71.6178	3.8177e-07	6.63788e-05
Os06g0651200	930.369	199.548	104.988	139.288	79.9851	72.9527	58.4074	113.509	64.8771	83.5818	9.31482	17.5804	19.0999	15.0368	8.5905	11.3962	14.3408	4.67073	3.82557e-07	6.63788e-05
Os04g0380300	597.407	698.417	260.062	616.081	358.643	188.461	237.801	148.006	178.875	1136.71	815.565	749.364	1038.08	889.319	765.628	1533.5	984.393	690.489	3.99659e-07	6.88808e-05
Os06g0696600	5318.97	2673.06	1725.08	3324.16	1306.42	1525.93	1699.03	1654.78	1958.36	3355.07	1543.16	1777.82	2149.7	1336.13	1233.81	3401.04	1248.67	1830.92	4.28612e-07	7.33783e-05
Os03g0751100	554.134	390.324	314.001	100.002	313.92	171.236	69.8803	130.201	58.3893	182.897	96.2532	85.7044	88.8146	153.59	95.5693	16.382	80.9231	16.3475	4.44067e-07	7.55208e-05
Os09g0396900	0	9.86775	15.4111	85.7157	6.88044	56.741	202.34	243.71	381.848	21.6329	49.6791	37.3583	22.9199	28.9995	8.5905	81.91	51.2171	107.427	4.77117e-07	8.06076e-05
Os10g0205700	2883.66	4242.04	1122.12	1491.99	1486.17	1066.93	683.158	880.248	600.576	583.106	694.472	564.77	411.603	845.282	755.964	397.441	842.009	485.755	5.05827e-07	8.47929e-05
Os08g0557600	3601.27	1586.51	701.204	1537.52	681.163	696.09	644.567	918.084	652.478	1582.15	430.552	493.35	871.911	409.215	485.363	509.979	379.007	326.951	5.08493e-07	8.47929e-05
Os07g0639500	91.3541	54.8208	18.3006	49.1079	29.2419	53.7013	17.7308	26.7079	17.6095	8.84984	0	0	58.2548	18.259	2.14762	0	0	0	5.14346e-07	8.52156e-05
Os10g0389300	418.305	338.793	41.4173	355.363	96.3261	154.011	54.2354	79.0109	60.243	332.361	48.6441	24.173	77.3547	23.6292	22.5501	20.6556	12.2921	15.5691	5.65002e-07	9.30081e-05
Os03g0724500	264.446	128.281	50.086	86.6085	74.8248	24.3176	43.8055	56.7543	46.3408	121.931	10.3498	15.3828	85.9496	31.1476	25.7715	25.6414	2.04868	1.55691	6.47992e-07	0.00010599
Os06g0318800	2513.44	763.106	1076.85	1000.91	338.001	739.659	573.644	452.922	796.134	3370.81	263.92	293.373	1283.51	244.885	350.063	3395.35	261.207	200.063	6.63367e-07	0.000107818
Os01g0444100	56.4953	111.834	101.135	16.0717	68.8044	43.569	2.08598	10.0155	5.56089	101.281	49.6791	27.4694	13.3699	46.1844	24.6977	0	19.4625	7.78454	6.78032e-07	0.000109509
Os05g0253200	407.487	178.716	91.5032	257.147	149.65	102.336	113.686	87.9135	90.8279	261.562	168.702	159.322	185.269	120.294	164.293	138.179	60.4362	84.0731	7.23222e-07	0.000116077
Os01g0511100	2123.98	1423.15	380.461	2090.21	473.89	595.78	375.476	465.163	289.166	2138.71	335.334	340.62	779.277	550.991	404.827	286.329	248.915	258.447	7.7609e-07	0.000123789
Os01g0959100	129.819	47.1459	17.3375	14.2859	5.16033	11.1456	27.1177	8.90264	8.34134	39.3326	53.819	56.0375	43.9298	24.7033	17.181	37.0376	4.09737	8.563	8.14966e-07	0.000129187
Os10g0498100	14.4243	10.9642	9.63192	1.78574	5.16033	6.07939	27.1177	37.8362	23.1704	11.7998	28.9795	19.7779	7.63997	6.44434	8.5905	34.1885	24.5842	34.252	8.88737e-07	0.000140017
Os06g0147250	91.3541	129.377	26.9694	154.467	47.303	28.3705	35.4616	13.354	22.2436	103.248	35.1893	19.7779	112.69	23.6292	17.181	23.5046	6.14605	14.7906	9.84563e-07	0.000154168
Os01g0848900	504.851	549.305	252.356	607.153	408.526	193.527	115.772	145.781	138.095	701.104	678.947	541.696	513.788	828.097	577.711	638.898	632.019	463.18	1.00808e-06	0.000156894
Os10g0565150	206.749	92.099	68.3866	278.576	66.2242	98.2835	55.2784	63.4313	65.8039	215.346	97.2882	101.087	241.614	144.998	93.4217	193.023	63.5092	84.8515	1.01644e-06	0.000157241
Os06g0196300	7614.84	8864.53	9922.8	4848.29	7739.63	6185.78	6019.09	8021.27	7696.27	4802.51	6873.3	5707.04	5040.47	6499.11	5953.22	4902.49	5758.85	5017.14	1.03729e-06	0.000159506
Os08g0482600	60.1013	4.38567	9.63192	35.7149	5.16033	10.1323	2.08598	8.90264	29.6581	1550.69	42.4342	97.7909	763.997	48.3325	103.086	2628.95	91.1665	60.7194	1.0444e-06	0.000159644
Os03g0203200	14355.8	11097.9	5488.27	10551.1	8050.11	6226.31	4638.17	4838.58	4475.59	11946.3	7399.07	7824.37	9949.15	10303.4	7946.21	8577.04	8114.84	6359.97	1.05901e-06	0.000160919
Os10g0481000	1098.65	358.528	235.019	242.861	251.996	317.142	120.987	160.247	120.486	480.841	155.247	157.125	454.578	198.7	193.286	426.644	181.309	139.343	1.15958e-06	0.000175164
Os02g0671100	496.437	323.443	130.031	458.043	152.23	107.403	59.4504	83.4622	80.6329	469.041	158.352	228.545	399.188	267.44	216.91	277.782	221.258	170.481	1.17203e-06	0.000176011
Os03g0237100	670.731	138.148	45.27	39.2863	36.9824	19.2514	25.0317	40.0619	19.4631	110.131	87.9733	73.6179	78.3097	47.2585	121.341	60.5422	58.3875	67.7255	1.18034e-06	0.000176227
Os03g0693700	38.4649	15.3498	8.66873	185.717	3.44022	0	0	2.22566	0	375.627	10.3498	4.3951	9.54996	8.59245	10.7381	2.84904	4.09737	0	1.24859e-06	0.00018534
Os07g0586100	323.345	43.8567	70.313	35.7149	22.3614	26.344	20.8598	33.3849	37.0726	45.2325	4.13992	13.1853	22.9199	12.8887	6.44287	8.54713	4.09737	2.33536	1.27967e-06	0.000188861
Os02g0209300	93.7581	19.7355	9.63192	21.4289	10.3207	4.05293	14.6018	11.1283	12.9754	331.377	39.3293	162.619	234.929	53.7028	114.898	333.338	32.779	88.7438	1.31861e-06	0.000193497
Os05g0322900	518.074	176.523	225.387	223.218	184.912	207.713	198.168	125.75	291.02	2285.23	653.073	980.107	1906.17	320.069	857.976	962.976	328.814	340.963	1.34864e-06	0.000196779
Os08g0174300	377.436	277.393	77.0554	195.539	89.4457	138.813	98.041	104.606	102.876	115.048	10.3498	8.7902	44.8848	21.4811	12.8857	4.27356	4.09737	2.33536	1.37758e-06	0.000199866
Os12g0570700	3668.59	7817.45	983.419	2477.72	1100.01	667.72	1850.26	2815.46	1468.08	5303.02	1170.56	802.105	891.966	519.843	540.128	1180.22	931.127	502.881	1.44315e-06	0.000208203
Os01g0888900	320.941	129.377	78.9817	175.003	104.927	72.9527	78.2242	17.8053	42.6335	300.895	254.605	243.928	338.069	303.958	260.936	226.499	201.795	178.266	1.46007e-06	0.000209467
Os03g0823400	10369.9	2450.49	1890.75	1929.5	2040.05	1681.97	1255.76	1560.19	1168.71	2754.27	1719.1	1440.49	3095.14	2730.25	1125.36	2645.34	1678.9	1422.24	1.54372e-06	0.000220238
Os01g0635200	522.882	744.467	479.67	359.827	473.03	283.705	203.383	327.172	302.142	419.876	495.756	471.374	350.484	519.843	474.625	413.111	587.973	321.502	1.60815e-06	0.000226908
Os03g0776900	361.81	154.595	108.841	224.111	113.527	116.522	117.858	123.524	114.925	246.812	51.749	110.976	180.494	94.5169	104.16	88.3203	45.0711	51.378	1.60268e-06	0.000226908
Os04g0531400	566.155	203.933	198.418	313.398	153.09	132.733	198.168	171.376	227.997	857.451	190.436	323.04	473.678	240.589	272.748	502.856	285.792	228.866	1.61714e-06	0.00022693
Os06g0194000	2758.65	3273.9	3221.88	2585.76	2573.28	2891.76	3506.53	3684.58	4026.08	3648.1	4558.05	5499.37	3701.56	3696.9	4202.9	4547.78	4971.13	5168.16	1.64685e-06	0.000229843
Os03g0826900	326.951	13.157	0	51.7865	0	4.05293	0	0	1.85363	125.864	14.4897	37.3583	55.3898	22.5552	23.6239	85.4713	2.04868	20.2398	1.69976e-06	0.000235945
Os07g0582400	2416.07	201.741	213.829	332.148	251.996	178.329	142.889	219.227	122.34	1231.11	250.465	363.694	679.957	287.847	585.228	966.538	284.767	268.567	1.74279e-06	0.000240617
Os01g0192300	1614.32	1260.88	828.345	1344.66	832.533	595.78	519.409	663.246	476.383	591.956	357.068	334.027	419.243	440.363	404.827	299.862	334.96	247.548	1.77112e-06	0.000243221
Os03g0386000	1300.59	1659.97	792.707	990.194	870.375	890.631	505.85	486.306	491.212	585.073	659.283	614.215	472.723	746.469	628.18	464.394	632.019	395.455	1.85949e-06	0.000253999
Os08g0502700	21408.1	39244	28100.2	17774.4	28068.7	18229.1	17630.7	22835.3	22212	26257.5	29932.7	25657.5	19964.2	33796.3	31201.8	18765.9	31931.8	21675.3	1.91323e-06	0.000259956
Os04g0208200	502.447	95.3882	36.6013	94.6444	80.8451	60.7939	27.1177	37.8362	25.9508	140.614	39.3293	52.7412	134.654	18.259	47.2477	29.9149	31.7546	10.8984	1.93364e-06	0.000261347
Os04g0482300	1520.56	1052.56	1263.71	353.577	678.583	892.657	1395.52	1853.97	2012.12	709.954	809.355	860.34	469.858	606.842	1242.4	1099.02	1399.25	1359.96	2.03631e-06	0.000273783
Os01g0126900	12.0203	8.77133	23.1166	12.5002	17.2011	24.3176	36.5046	102.38	84.3402	5.89989	6.20988	45.0498	3.81998	19.333	15.0334	59.1176	28.6816	74.7316	2.06201e-06	0.000275794
Os11g0635500	204.345	665.525	1862.81	325.005	795.551	700.143	1530.06	1966.37	2304.99	202.563	833.159	762.55	283.634	317.921	929.922	438.04	970.052	729.412	2.08837e-06	0.000277872
Os09g0522000	205.547	8.77133	5.77915	9.82159	4.30027	4.05293	9.3869	0	23.1704	574.256	7.24486	21.9755	706.697	13.9627	9.66431	1864.7	16.3895	10.1199	2.1798e-06	0.000288542
Os02g0612900	6873.19	2849.59	1389.89	1975.92	1418.23	1346.59	1145.2	1689.28	1013.94	1811.27	628.233	797.71	1689.39	883.948	964.284	661.69	685.285	529.349	2.24998e-06	0.000296305
Os06g0141200	298.103	981.293	106.914	212.503	439.488	138.813	94.912	356.105	165.9	248.779	721.381	383.472	363.854	588.583	486.437	220.801	710.894	352.64	2.29318e-06	0.000300453
Os03g0230300	582.983	1650.11	192.638	974.123	249.416	210.752	174.179	178.053	122.34	992.165	156.282	105.482	246.389	153.59	103.086	145.301	108.58	80.1808	2.32191e-06	0.000302674
Os01g0692000	296.901	53.7244	41.4173	151.788	44.7228	32.4234	25.0317	28.9336	31.5117	247.795	22.7696	62.6301	104.095	48.3325	22.5501	28.4904	38.925	21.7967	2.34268e-06	0.000303838
Os09g0482800	361.81	50.4352	37.5645	13.3931	20.6413	22.2911	6.25793	28.9336	12.9754	119.964	26.9095	8.7902	47.7498	17.1849	21.4762	28.4904	8.19474	4.67073	2.42168e-06	0.000312506
Os03g0857900	942.389	1092.03	747.437	838.406	803.291	910.896	511.065	526.368	497.7	995.115	909.748	869.131	1002.75	1011.76	994.35	825.51	754.94	508.331	2.5579e-06	0.000328435
Os01g0898800	979.652	1369.42	730.099	1075.02	1062.17	693.051	609.106	794.56	590.381	481.825	479.196	343.916	373.403	532.732	388.72	331.201	540.853	287.25	2.64803e-06	0.000338315
Os04g0121800	503.649	53.7244	11.5583	143.752	33.5421	16.2117	28.1607	15.5796	16.6827	581.139	143.862	326.336	302.734	112.776	310.332	250.716	139.311	150.242	2.81406e-06	0.000355986
Os04g0634800	637.074	62.4957	39.4909	106.252	42.1427	37.4896	20.8598	26.7079	25.9508	247.795	186.296	170.31	212.009	281.403	249.124	179.49	94.2395	101.199	2.80881e-06	0.000355986
Os10g0552400	240.405	308.093	48.1596	168.753	61.9239	57.7542	44.8485	77.8981	59.3162	336.294	64.1688	67.0252	112.69	27.9255	40.8049	54.8441	29.7059	15.5691	2.87516e-06	0.000361932
Os03g0439800	1901.61	3431.78	2062.19	912.515	2185.4	1206.76	884.455	1028.25	980.57	1956.8	1365.14	1158.11	969.321	1471.46	1197.3	732.204	1277.36	920.133	2.89331e-06	0.00036244
Os01g0615100	971.238	184.198	13.4847	1444.67	32.6821	54.7145	39.6336	15.5796	12.9754	1391.39	573.379	544.992	91.6796	30.0736	143.891	68.377	30.7303	107.427	2.93757e-06	0.000364429
Os02g0759400	341.376	123.895	135.81	225.004	119.548	102.336	107.428	89.0264	219.655	2605.79	136.617	205.471	2218.46	206.219	285.634	9834.18	261.207	294.256	2.92876e-06	0.000364429
Os09g0385700	435.134	62.4957	53.9387	62.501	36.9824	48.6351	29.2037	51.1902	55.6089	96.3649	22.7696	28.5681	148.024	20.4071	27.9191	83.3345	24.5842	29.5813	3.09607e-06	0.000382246
Os08g0112300	292.093	336.6	21.1902	465.186	22.3614	22.2911	8.34391	6.67698	11.1218	426.759	128.338	156.026	163.304	62.2953	117.046	147.438	61.4605	54.4918	3.14359e-06	0.000386255
Os01g0805400	459.174	61.3993	42.3804	232.147	73.1046	66.8733	77.1812	66.7698	62.0966	298.928	80.7285	162.619	144.204	69.8137	78.3883	98.292	67.6066	56.0487	3.38346e-06	0.000413748
Os12g0114000	115.395	24.1212	23.1166	23.2147	11.1807	6.07939	14.6018	4.45132	21.3167	108.165	16.5597	6.59265	55.3898	17.1849	15.0334	146.726	5.12171	9.34145	3.52663e-06	0.000429212
Os04g0482600	21.6365	6.5785	1.92638	26.7861	12.0408	8.10586	2.08598	0	0	10.8165	0	4.3951	17.1899	8.59245	1.07381	0	0	0	3.56787e-06	0.000432184
Os10g0490900	110.586	67.9778	3.85277	62.501	18.0611	10.1323	12.5159	4.45132	5.56089	66.8655	20.6996	8.7902	15.2799	2.14811	6.44287	9.97165	8.19474	9.34145	3.59338e-06	0.000433229
Os01g0863300	138.233	63.5922	44.3068	122.323	43.0027	46.6087	52.1494	45.626	56.5357	413.976	26.9095	30.7657	291.274	44.0363	51.543	692.317	34.8276	29.5813	3.63432e-06	0.000436118
Os11g0151800	96.1622	24.1212	11.5583	143.752	6.88044	14.1852	4.17196	11.1283	5.56089	67.8488	8.27984	6.59265	21.0099	17.1849	12.8857	2.84904	0	3.11382	3.71996e-06	0.000443392
Os09g0129500	110.586	111.834	42.3804	31.2505	52.4633	22.2911	3.12897	8.90264	18.5363	259.595	128.338	131.853	91.6796	47.2585	143.891	49.146	36.8763	35.8089	3.72947e-06	0.000443392
Os02g0181300	694.772	215.994	180.117	291.969	185.772	176.302	112.643	121.298	161.266	3624.5	397.432	869.131	1916.68	451.104	862.271	3948.06	533.682	467.851	3.77729e-06	0.000445748
Os02g0643000	1181.59	897.965	439.216	857.157	540.114	397.187	356.702	402.844	337.361	870.234	492.651	483.461	509.968	527.362	380.13	389.607	501.928	336.292	3.78536e-06	0.000445748
Os07g0628500	0	13.157	11.5583	21.4289	22.3614	45.5954	136.632	117.96	156.632	21.6329	39.3293	32.9632	97.4096	38.666	19.3286	98.292	43.0224	82.5162	3.80136e-06	0.000445748
Os12g0443000	14.4243	6.5785	7.70554	4.46436	0	0	16.6878	11.1283	22.2436	49.1658	23.8045	26.3706	17.1899	8.59245	6.44287	40.5989	5.12171	7.78454	3.87412e-06	0.000452216
Os07g0539200	62.5054	70.1706	36.6013	105.359	58.4837	28.3705	25.0317	13.354	23.1704	82.5985	15.5247	21.9755	52.5248	18.259	28.9929	22.7923	6.14605	7.00609	3.91647e-06	0.00045509
Os03g0288000	151.455	9.86775	5.77915	41.0721	3.44022	9.11909	4.17196	4.45132	0	59.9822	77.6235	14.2841	15.2799	8.59245	20.4024	5.69809	4.09737	3.11382	4.06746e-06	0.000470506
Os12g0257600	57.6973	383.746	17.3375	923.229	29.2419	21.2779	8.34391	20.0309	11.1218	1292.08	331.194	50.5436	157.574	18.259	50.4692	38.4621	2.04868	4.67073	4.29858e-06	0.000495011
Os11g0153100	239.203	39.471	23.1166	46.4293	36.1223	27.3573	8.34391	15.5796	3.70726	55.0657	42.4342	56.0375	67.8047	52.6288	15.0334	37.7498	28.6816	22.5752	4.35733e-06	0.000497739
Os05g0397300	1025.33	689.646	510.492	911.622	669.123	641.376	434.926	413.973	425.408	2017.76	1596.97	1605.31	2265.25	1756.08	1436.76	2951.61	1428.96	1205.05	4.36103e-06	0.000497739
Os02g0643500	3269.51	4104.98	3704.44	2638.44	3318.09	2504.71	2714.9	3700.16	3354.14	1844.7	2061.68	1970.1	1846.96	2473.55	2303.33	2074.1	2693	2124.4	4.40814e-06	0.000498832
Os04g0142400	543.316	427.602	100.172	275.004	136.749	62.8204	129.331	111.283	79.7061	917.433	318.774	487.856	584.458	200.849	380.13	545.592	327.79	238.985	4.40945e-06	0.000498832
Os09g0491708	2591.57	2351.81	1324.39	2200.04	1790.63	1574.56	1271.4	1376.57	1073.25	2369.79	1392.05	1417.42	1829.77	1719.56	1358.37	1327.65	1174.92	1159.9	4.66188e-06	0.000525075
Os04g0544000	238.001	65.785	30.8221	50.0008	28.3818	13.172	18.7738	43.4003	16.6827	72.7653	31.0494	24.173	75.4447	38.666	49.3954	44.1602	40.9737	21.7967	4.68351e-06	0.000525207
Os03g0830400	67.3135	2.19283	7.70554	1.78574	1.72011	2.02646	6.25793	0	3.70726	62.9322	12.4198	41.7534	28.6499	9.66651	42.9525	43.4479	24.5842	23.3536	4.7195e-06	0.000526943
Os02g0168200	14.4243	72.3635	7.70554	76.7869	21.5014	1.01323	10.4299	17.8053	3.70726	57.0323	64.1688	28.5681	9.54996	2.14811	4.29525	4.27356	6.14605	0	4.84876e-06	0.000536707
Os04g0447700	322.143	94.2918	15.4111	86.6085	43.0027	40.5293	15.6448	27.8207	23.1704	127.831	26.9095	43.951	108.87	32.2217	28.9929	24.2169	7.1704	19.4614	4.82946e-06	0.000536707
Os09g0455300	185.112	201.741	129.068	102.68	75.6848	37.4896	73.0092	44.5132	59.3162	81.6152	82.7984	35.1608	87.8596	168.627	95.5693	152.424	104.483	48.2642	4.99146e-06	0.000550132
Os09g0532000	703.186	508.737	164.706	917.872	246.836	293.837	286.822	419.537	231.704	759.12	539.225	449.399	404.918	255.625	303.889	248.579	144.432	122.996	5.01482e-06	0.000550344
Os03g0315400	847.429	330.021	236.945	295.54	201.253	145.905	153.319	215.889	196.485	541.807	146.967	169.211	262.624	195.478	179.327	683.77	199.747	156.469	5.12757e-06	0.000560324
Os03g0122300	376.234	111.834	69.3498	248.218	45.5829	126.654	93.869	75.6724	72.2916	962.666	456.426	483.461	406.828	248.107	384.425	492.884	261.207	233.536	5.15454e-06	0.000560884
Os12g0564100	158.668	275.201	38.5277	257.147	44.7228	93.2173	6.25793	55.6415	14.829	292.045	84.8684	42.8522	70.6697	38.666	18.2548	38.4621	4.09737	6.22763	5.24963e-06	0.000568821
Os06g0649000	40.8689	4.38567	1.92638	10.7145	0	5.06616	4.17196	2.22566	7.41452	642.105	93.1482	353.805	348.574	35.4439	236.239	443.738	131.116	108.984	5.53524e-06	0.000597247
Os01g0221000	246.416	194.066	154.111	332.148	236.515	216.832	249.274	203.648	152.924	419.876	292.899	337.324	538.618	359.809	386.572	409.55	374.909	285.693	5.97904e-06	0.000642434
Os07g0529000	394.265	1028.44	42.3804	2774.15	92.0259	66.8733	54.2354	44.5132	16.6827	2344.22	676.877	283.484	827.027	347.994	266.305	217.24	4.09737	40.4796	6.06193e-06	0.000648626
Os04g0438600	186.314	103.063	58.7547	275.004	197.813	199.607	371.304	435.116	392.97	169.13	211.136	356.003	529.068	355.513	403.753	565.535	475.295	520.007	6.29288e-06	0.00067009
Os06g0473800	94.9601	6.5785	2.88958	53.5723	8.60055	8.10586	5.21494	10.0155	1.85363	13.7664	4.13992	0	15.2799	12.8887	2.14762	0	0	0.778454	6.31471e-06	0.00067009
Os03g0429000	564.953	145.823	224.424	263.397	193.512	218.858	335.842	321.608	300.288	543.773	279.445	362.596	419.243	215.885	277.044	929.5	490.66	386.892	6.35296e-06	0.000671375
Os01g0627800	33.6568	185.294	84.7609	134.824	94.606	85.1115	78.2242	70.1083	80.6329	175.03	4.13992	8.7902	133.699	10.7406	4.29525	0	0	0	6.55348e-06	0.000689727
Os10g0524300	562.549	167.752	44.3068	113.395	75.6848	40.5293	45.8915	52.303	33.3653	141.597	89.0083	46.1485	66.8497	122.442	100.938	55.5563	65.5579	38.1443	6.62113e-06	0.000691436
Os02g0156600	19.2324	4.38567	6.74234	15.1788	8.60055	6.07939	18.7738	11.1283	3.70726	97.3482	27.9445	19.7779	55.3898	19.333	26.8453	54.8441	23.5599	17.9044	6.66452e-06	0.000691436
Os04g0415800	140.637	2.19283	4.81596	29.4648	6.88044	8.10586	0	0	0	43.2659	0	0	3.81998	0	4.29525	0	0	0	6.67742e-06	0.000691436
Os06g0698748	3429.38	1192.9	636.67	2455.4	1207.52	948.385	805.187	626.523	500.48	2863.41	2309.04	2452.46	2836.34	2863.43	2050.98	2998.62	1982.1	2096.38	6.66499e-06	0.000691436
Os04g0469000	1318.62	268.622	191.675	465.186	173.731	274.586	192.953	232.581	275.264	11347.5	2267.64	6113.58	7983.77	1712.05	4986.78	9708.83	2359.06	2178.89	6.87961e-06	0.000709512
Os09g0351700	69.7176	55.9172	151.221	21.4289	68.8044	88.1512	197.125	106.832	272.484	126.848	302.214	384.571	104.095	146.072	357.58	356.13	354.422	382.221	7.07425e-06	0.000726667
Os01g0864200	224.779	8.77133	7.70554	9.82159	6.88044	2.02646	2.08598	4.45132	12.9754	319.578	41.3992	128.557	148.024	35.4439	117.046	275.645	88.0935	45.9288	7.43374e-06	0.000757533
Os11g0184800	204.345	455.013	146.405	316.077	255.436	175.289	132.46	131.314	105.657	414.959	44.5042	61.5314	347.619	307.18	125.636	24.2169	14.3408	31.9166	7.41714e-06	0.000757533
Os04g0450600	222.375	95.3882	118.473	243.754	164.27	125.641	157.491	150.232	159.412	287.128	204.926	148.335	195.774	117.072	122.415	144.589	85.0204	105.87	7.48564e-06	0.00075913
Os09g0115900	1476.09	258.754	256.209	634.832	303.599	280.665	165.835	156.909	141.803	1077.71	716.206	879.02	1020.89	1181.46	842.943	1445.89	987.466	628.213	7.50853e-06	0.00075913
Os06g0694400	461.578	860.687	475.817	513.401	536.674	360.711	289.951	284.884	273.41	457.242	298.074	232.94	295.094	370.549	265.232	222.938	228.428	165.811	7.579e-06	0.00076325
Os02g0590400	1322.23	1820.05	2175.85	1291.09	1805.25	1723.51	2182.98	3394.13	3309.66	918.417	1342.37	986.7	1052.41	811.986	803.212	1054.15	1776.21	1466.61	7.70518e-06	0.000772926
Os06g0677000	39.6669	60.3029	103.062	70.5368	170.291	172.249	150.19	181.391	181.656	46.2158	159.387	79.1118	93.5896	84.8504	89.1264	148.15	313.449	171.26	7.79168e-06	0.000778562
Os03g0572250	445.952	365.107	173.375	219.646	245.116	208.726	141.847	174.714	142.73	137.664	122.128	67.0252	140.384	136.405	103.086	60.5422	79.8987	62.2763	7.87309e-06	0.000783647
Os08g0335500	86.5459	134.859	79.9449	106.252	79.125	24.3176	51.1065	72.3339	51.9016	60.9656	14.4897	21.9755	36.2899	17.1849	2.14762	2.84904	4.09737	0	7.95904e-06	0.000789144
Os03g0107700	222.375	41.6638	75.129	96.4301	33.5421	60.7939	50.0635	55.6415	117.706	380.543	101.428	153.828	349.529	60.1471	114.898	470.804	67.6066	85.63	8.13615e-06	0.000803601
Os01g0337500	28.8486	35.0853	11.5583	1.78574	7.74049	4.05293	6.25793	2.22566	3.70726	111.115	100.393	142.841	54.4348	32.2217	77.3145	45.5847	30.7303	54.4918	8.22407e-06	0.000809173
Os04g0573900	335.366	285.068	157	432.15	264.037	206.699	159.577	132.427	121.413	644.072	372.593	499.942	425.928	385.586	464.961	428.781	322.668	281.8	8.37319e-06	0.000820701
Os03g0796900	400.275	158.98	98.2456	121.431	73.1046	98.2835	124.116	96.8162	112.145	297.945	142.827	191.187	197.684	148.22	132.079	255.702	167.992	133.894	8.44471e-06	0.000824563
Os01g0348900	1141.93	550.401	406.467	2443.79	372.404	263.44	462.044	535.271	797.988	2847.68	1193.33	342.818	204.369	221.256	149.26	458.696	545.975	370.544	8.58107e-06	0.00083031
Os02g0740700	502.447	169.945	127.141	272.326	61.0639	127.667	64.6653	97.929	101.95	385.46	201.821	190.088	225.379	144.998	171.81	201.57	91.1665	83.2946	8.60057e-06	0.00083031
Os06g0602500	134.627	200.644	91.5032	327.684	160.83	164.144	81.3531	79.0109	57.4625	574.256	221.486	347.213	353.349	234.144	294.225	284.904	196.674	186.829	8.55282e-06	0.00083031
Os02g0702300	31.2527	2.19283	0.963192	32.1434	5.16033	0	6.25793	0	0	32.4494	8.27984	0	8.59496	0	4.29525	49.146	2.04868	3.89227	8.86097e-06	0.000852246
Os01g0955100	88.95	164.462	36.6013	53.5723	34.4022	32.4234	17.7308	20.0309	12.9754	174.047	94.1832	119.766	189.089	48.3325	64.4287	96.1552	28.6816	42.0365	8.94243e-06	0.000856106
Os04g0430600	884.692	296.032	127.141	343.756	168.571	196.567	103.256	126.863	144.583	763.053	203.891	274.694	414.468	270.662	328.587	435.904	155.7	196.949	8.96778e-06	0.000856106
Os10g0505900	502.447	35.0853	46.2332	812.513	34.4022	72.9527	39.6336	77.8981	22.2436	420.859	10.3498	17.5804	47.7498	19.333	17.181	10.6839	30.7303	27.2459	9.05134e-06	0.000860883
Os03g0299800	180.304	165.559	42.3804	183.039	104.927	87.1379	60.4934	46.7388	51.9016	255.662	99.3581	72.5191	170.944	103.109	95.5693	97.5797	77.85	63.8332	9.44092e-06	0.000894623
Os01g0946700	0	1.09642	1.92638	3.57149	6.88044	4.05293	0	1.11283	0	32.4494	108.673	65.9265	13.3699	6.44434	17.181	2.84904	10.2434	20.2398	9.47779e-06	0.000894815
Os11g0163800	869.066	504.352	533.608	691.975	515.173	420.491	499.592	513.014	416.14	526.074	366.383	329.632	551.033	468.288	431.673	504.281	342.13	351.083	9.56124e-06	0.000899387
Os10g0527800	3539.97	246.694	144.479	366.077	319.08	335.38	238.844	332.736	171.461	1426.79	254.605	531.807	970.276	364.105	372.613	344.022	206.917	189.164	9.73246e-06	0.000912152
Os04g0228400	137.031	168.848	65.4971	121.431	192.652	48.6351	61.5363	84.575	52.8285	25.5662	49.6791	13.1853	24.8299	21.4811	22.5501	25.6414	147.505	28.0244	9.91977e-06	0.000926326
Os03g0307300	988.066	1892.41	65.4971	112.502	208.133	160.091	0	22.2566	0	1053.13	8.27984	10.9877	19.0999	2.14811	2.14762	0	0	0	9.96674e-06	0.00092734
Os09g0379600	204.345	226.958	118.473	284.826	150.51	110.442	65.7083	129.088	88.9742	329.411	93.1482	68.124	75.4447	60.1471	57.9859	62.6789	46.0954	31.1382	1.01335e-05	0.000939457
Os01g0727500	474.801	26.314	9.63192	38.3935	18.9212	29.3837	0	6.67698	7.41452	146.514	62.0988	65.9265	87.8596	40.8141	61.2073	128.207	38.925	35.8089	1.03225e-05	0.000950112
Os07g0638100	3369.28	939.629	557.688	1400.92	561.616	610.979	652.911	773.416	606.137	2818.18	251.5	319.743	816.522	408.141	346.841	334.05	409.737	272.459	1.02908e-05	0.000950112
Os09g0522100	26.4446	0	0	8.03584	0	2.02646	9.3869	6.67698	11.1218	31.4661	2.06996	3.29632	46.7948	2.14811	2.14762	99.7165	14.3408	6.22763	1.04792e-05	0.000961096
Os03g0149300	116.597	233.537	367.939	160.717	400.785	236.083	212.77	357.218	377.214	273.362	537.155	517.523	283.634	639.063	614.221	350.432	640.214	400.125	1.0883e-05	0.000994571
Os09g0325700	1147.94	180.909	162.779	275.004	133.308	109.429	32.3327	125.75	75.9988	66.8655	10.3498	10.9877	21.0099	6.44434	12.8857	9.97165	6.14605	7.78454	1.09713e-05	0.00099909
Os01g0191900	495.235	316.864	183.006	179.467	185.772	164.144	161.663	151.345	106.584	228.129	154.212	164.816	208.189	215.885	202.951	144.589	185.406	108.984	1.10997e-05	0.00100721
Os03g0351300	1259.72	609.608	602.958	1384.84	601.178	969.663	699.846	742.257	658.966	1646.07	951.147	907.588	2183.12	1382.31	1066.3	2055.58	865.569	1044.69	1.25732e-05	0.00113292
Os06g0295900	901.52	294.936	190.712	271.433	246.836	149.958	151.233	140.217	147.364	394.309	309.459	308.756	343.799	355.513	193.286	415.248	279.645	263.896	1.25605e-05	0.00113292
Os04g0690800	1801.84	2208.18	1378.33	577.688	809.311	884.551	949.12	1066.09	1097.35	1404.17	2046.16	1153.71	673.272	1611.08	1427.1	1032.07	1785.43	1424.57	1.27115e-05	0.00113739
Os05g0427100	1508.54	596.451	401.651	508.044	453.249	391.108	329.585	327.172	317.898	1149.5	627.198	798.809	823.207	653.026	697.978	1087.62	771.33	612.643	1.26795e-05	0.00113739
Os03g0760000	19.2324	81.1348	28.8958	111.609	24.0815	38.5028	13.5589	0	1.85363	125.864	47.6091	29.6669	28.6499	45.1104	21.4762	5.69809	15.3651	3.11382	1.29474e-05	0.00115447
Os09g0417800	105.778	135.956	21.1902	25.0004	47.303	8.10586	10.4299	13.354	1.85363	137.664	82.7984	134.05	73.5347	23.6292	81.6097	37.0376	30.7303	17.126	1.31914e-05	0.00117216
Os01g0606900	251.224	110.738	106.914	217.861	67.9443	77.0056	62.5793	87.9135	84.3402	191.747	20.6996	13.1853	87.8596	27.9255	15.0334	55.5563	16.3895	12.4553	1.33252e-05	0.00117997
Os10g0543400	15.6264	2.19283	5.77915	16.9646	6.88044	0	0	0	0	62.9322	6.20988	4.3951	3.81998	4.29622	2.14762	15.6697	10.2434	5.44918	1.33757e-05	0.00118037
Os01g0664500	2069.89	981.293	736.842	661.618	628.7	525.867	574.687	647.667	571.845	605.722	474.021	332.929	398.233	380.216	333.956	356.13	370.812	334.735	1.36926e-05	0.0012042
Os11g0684000	150.253	103.063	70.313	233.039	34.4022	58.7675	79.2672	104.606	55.6089	1152.45	194.576	358.201	279.814	119.22	205.098	550.578	156.724	161.918	1.37769e-05	0.00120747
Os03g0595300	2684.13	3232.24	2490.81	1645.56	2435.67	1234.12	1629.15	2231.22	2013.04	1281.26	1636.3	1246.01	991.286	1517.64	1412.06	1003.58	1272.23	951.271	1.38953e-05	0.00121371
Os01g0186000	366.618	61.3993	56.8283	71.4297	21.5014	22.2911	20.8598	46.7388	25.024	87.5151	35.1893	39.5559	30.5599	36.5179	28.9929	63.3912	41.998	42.815	1.39717e-05	0.00121625
Os01g0923000	1688.85	145.823	140.626	198.217	152.23	187.448	132.46	120.186	97.3156	472.975	330.159	328.534	508.058	350.142	293.151	475.078	276.572	263.896	1.42997e-05	0.00124014
Os10g0320100	20.4345	7.67491	176.264	30.3576	44.7228	144.892	375.476	362.782	354.043	24.5829	134.547	227.446	72.5797	76.258	204.024	134.617	278.621	191.5	1.43427e-05	0.00124014
Os03g0133100	69.7176	2.19283	4.81596	133.038	0	0	0	0	0	27.5328	0	0	3.81998	0	2.14762	1.42452	0	0	1.44459e-05	0.00124487
Os08g0202500	63.7074	4.38567	3.85277	23.2147	1.72011	0	4.17196	4.45132	7.41452	60.9656	6.20988	10.9877	9.54996	2.14811	2.14762	4.27356	2.04868	4.67073	1.46142e-05	0.00125516
Os03g0153900	323.345	76.7491	17.3375	116.966	44.7228	38.5028	27.1177	31.1592	12.9754	545.74	99.3581	174.705	162.349	100.961	195.434	237.895	78.8744	124.553	1.47034e-05	0.00125862
Os07g0212200	7492.23	10327.1	12585.1	5893.84	9752.16	8680.36	7850.58	10924.6	11353.5	5858.59	9440.06	7727.68	5820.7	10110.1	9580.55	6519.32	9977.1	6339.73	1.48635e-05	0.00126809
Os01g0771000	959.218	357.432	157	58.9295	91.1658	127.667	35.4616	60.0928	98.2424	139.631	82.7984	84.6056	37.2448	92.3688	76.2407	34.1885	63.5092	40.4796	1.56837e-05	0.00132923
Os02g0654700	96.1622	10.9642	30.8221	37.5006	10.3207	10.1323	31.2897	22.2566	57.4625	553.607	58.9939	325.237	382.953	129.961	188.991	479.351	131.116	105.091	1.56813e-05	0.00132923
Os01g0179600	17871.7	19111.6	6179.84	8525.14	10294.9	10365.4	4529.7	8131.44	5749.03	4734.66	3738.35	2573.33	4595.44	13207.7	4397.26	1497.88	4139.37	2385.18	1.62271e-05	0.00137076
Os11g0151200	100.97	38.3746	19.2638	70.5368	54.1834	14.1852	11.4729	13.354	12.9754	38.3493	16.5597	10.9877	39.1548	22.5552	7.51669	12.8207	4.09737	10.1199	1.63509e-05	0.00137669
Os03g0734200	122.607	33.9889	11.5583	111.609	1.72011	2.02646	0	8.90264	12.9754	189.78	28.9795	15.3828	19.0999	4.29622	8.5905	5.69809	2.04868	2.33536	1.64462e-05	0.00138019
Os11g0546000	994.076	887.001	1246.37	1515.2	1248.8	1416.5	1616.63	1243.03	1658.07	1064.93	1139.51	1176.79	1320.76	1079.43	1312.2	1441.62	1193.36	1430.8	1.66139e-05	0.00138972
Os08g0140500	91.3541	30.6997	38.5277	127.681	54.1834	66.8733	64.6653	48.9645	64.8771	259.595	155.247	393.361	143.249	108.48	108.455	113.249	76.8257	133.116	1.67615e-05	0.00139752
Os01g0597800	84.1419	60.3029	15.4111	41.0721	8.60055	26.344	25.0317	11.1283	16.6827	300.895	53.819	203.273	249.254	90.2207	94.4955	124.646	44.0467	57.6056	1.68829e-05	0.00140308
Os06g0710001	792.136	133.763	67.4234	162.503	60.2038	66.8733	85.5251	97.929	103.803	202.563	15.5247	64.8277	157.574	59.0731	45.1001	87.6081	61.4605	36.5873	1.69935e-05	0.00140772
Os12g0432600	26.4446	0	0	0	0	0	4.17196	2.22566	0	57.0323	14.4897	36.2596	52.5248	8.59245	4.29525	42.7356	12.2921	7.78454	1.72826e-05	0.00142706
Os02g0134200	209.153	36.1817	36.6013	58.9295	46.443	46.6087	39.6336	51.1902	27.8045	309.744	45.5391	119.766	354.304	66.5915	113.824	226.499	46.0954	52.1564	1.74834e-05	0.00143902
Os01g0558700	213.961	19.7355	8.66873	28.5719	8.60055	19.2514	6.25793	4.45132	9.26815	37.366	19.6646	13.1853	41.0648	10.7406	8.5905	9.97165	12.2921	9.34145	1.81078e-05	0.00148565
Os05g0549800	326.951	47.1459	46.2332	136.609	69.6644	77.0056	37.5476	27.8207	50.048	218.296	47.6091	125.26	116.51	66.5915	114.898	118.235	54.2902	58.3841	1.8347e-05	0.00150048
Os10g0475100	1872.76	4388.95	1832.95	276.79	2297.21	1406.37	393.207	502.999	393.896	495.591	603.394	165.915	364.809	848.504	173.958	283.48	403.591	412.581	1.84614e-05	0.00150504
Os11g0454200	263.244	74.5563	75.129	1251.81	10.3207	95.2438	8.34391	13.354	8.34134	284.178	2.06996	2.19755	1.90999	6.44434	0	4.27356	6.14605	1.55691	1.88927e-05	0.00153497
Os12g0604300	45.677	37.2782	57.7915	85.7157	80.8451	151.985	117.858	105.719	88.9742	33.4327	44.5042	48.3461	63.0297	48.3325	53.6906	86.1835	99.3612	88.7438	1.8948e-05	0.00153497
Os02g0656600	43.273	33.9889	65.4971	37.5006	46.443	59.7807	42.7625	66.7698	85.267	49.1658	77.6235	182.397	55.3898	75.1839	113.824	76.2119	87.0691	144.792	1.92248e-05	0.0015525
Os11g0303800	68.5155	373.878	67.4234	949.122	101.486	75.9924	113.686	44.5132	72.2916	439.542	37.2593	35.1608	44.8848	10.7406	17.181	55.5563	23.5599	38.9227	1.95392e-05	0.00156802
Os04g0128700	21.6365	2.19283	0	3.57149	0	4.05293	2.08598	0	1.85363	164.214	23.8045	58.2351	70.6697	8.59245	32.2144	51.2828	22.5355	21.0183	1.95299e-05	0.00156802
Os04g0675400	105.778	99.7739	78.9817	199.11	59.3438	102.336	31.2897	73.4467	57.4625	419.876	24.8395	10.9877	42.0198	57.999	19.3286	7.12261	6.14605	3.11382	1.96367e-05	0.00157094
Os05g0454500	2012.19	951.689	813.897	1588.42	1240.2	641.376	713.404	736.693	673.795	2555.64	1430.34	1602.01	2467.71	1693.79	1490.45	3290.64	1092.97	1120.2	2.02749e-05	0.00161696
Os01g0956200	33.6568	14.2534	11.5583	17.8574	3.44022	4.05293	4.17196	3.33849	4.63408	45.2325	10.3498	8.7902	9.54996	9.66651	9.66431	51.2828	8.19474	14.0122	2.0565e-05	0.00163502
Os06g0689600	129.819	71.2671	44.3068	108.93	40.4226	45.5954	47.9775	25.5951	35.219	249.762	159.387	217.557	121.285	73.0358	156.777	102.566	89.1178	72.3962	2.08055e-05	0.00164903
Os01g0695900	78.1318	19.7355	0.963192	26.7861	24.9416	12.1588	22.9458	13.354	12.9754	69.8154	2.06996	4.3951	29.6049	0	1.07381	2.84904	0	0	2.1239e-05	0.00167821
Os04g0288100	67.3135	14.2534	0	4.46436	0	1.01323	4.17196	0	1.85363	189.78	217.346	399.954	119.375	44.0363	133.153	59.8299	30.7303	80.1808	2.14702e-05	0.00169127
Os04g0623800	10323	16593.2	20609.4	9919.8	16586.2	12971.4	13433.7	16836	18327.8	8625.64	13113.2	11493.2	8534.8	14679.1	13154.2	9567.09	16670.1	10813.5	2.18982e-05	0.00171972
Os10g0499400	7503.05	711.574	1011.35	683.047	752.548	926.094	698.803	1007.11	740.525	1840.77	849.719	621.906	1394.29	791.579	743.078	3138.93	781.573	748.095	2.24052e-05	0.00174595
Os03g0787000	515.67	100.87	124.252	142.859	77.4049	121.588	113.686	114.621	85.267	599.822	152.142	326.336	339.979	173.997	322.144	589.04	242.769	226.53	2.24362e-05	0.00174595
Os09g0397300	1792.22	1413.28	1306.09	2457.18	1832.78	1886.64	1796.03	870.233	1271.59	3319.67	2730.28	2250.29	4134.18	2907.47	2013.4	4096.21	1967.76	2583.69	2.24172e-05	0.00174595
Os05g0571800	216.365	57.0137	44.3068	57.1438	39.5625	38.5028	31.2897	44.5132	37.0726	80.6319	20.6996	24.173	66.8497	34.3698	23.6239	76.9242	28.6816	29.5813	2.30566e-05	0.0017888
Os01g0510200	786.126	95.3882	49.1228	67.8582	85.1454	91.1909	43.8055	103.493	92.6815	306.794	22.7696	64.8277	236.839	44.0363	49.3954	41.3111	18.4382	15.5691	2.35713e-05	0.0018069
Os01g0915000	1021.72	326.732	255.246	254.468	282.098	280.665	133.503	210.325	125.12	561.473	434.692	315.348	630.297	480.103	293.151	656.704	300.132	309.825	2.34034e-05	0.0018069
Os11g0214400	0	2.19283	9.63192	3.57149	1.72011	14.1852	4.17196	0	3.70726	55.0657	53.819	165.915	15.2799	10.7406	49.3954	61.2544	63.5092	81.7377	2.35293e-05	0.0018069
Os11g0587600	218.769	663.332	130.031	469.65	221.894	192.514	147.061	95.7033	104.73	1532.01	655.143	836.167	814.612	494.066	380.13	479.351	283.743	245.213	2.34611e-05	0.0018069
Os06g0726100	463.982	41.6638	9.63192	159.824	13.7609	24.3176	4.17196	6.67698	0	191.747	161.457	301.064	138.474	88.0726	148.186	188.749	226.38	110.541	2.46919e-05	0.00188717
Os05g0130100	371.426	233.537	111.73	627.689	120.408	165.157	65.7083	73.4467	81.5597	587.039	157.317	396.658	319.924	291.069	248.051	327.64	144.432	215.632	2.49678e-05	0.00190259
Os03g0734300	599.811	186.391	38.5277	690.19	18.9212	25.3308	27.1177	60.0928	18.5363	982.332	544.4	250.521	124.149	118.146	149.26	171.655	43.0224	108.984	2.52199e-05	0.00191612
Os07g0686800	7.21216	3.28925	0.963192	16.9646	0.860055	8.10586	2.08598	0	0	66.8655	12.4198	37.3583	45.8398	4.29622	17.181	27.7782	8.19474	1.55691	2.5331e-05	0.00191888
Os04g0555000	151.455	52.628	51.0492	64.2867	45.5829	34.4499	49.0205	46.7388	33.3653	74.732	57.9589	39.5559	81.1747	41.8882	49.3954	79.7732	58.3875	31.1382	2.58191e-05	0.0019501
Os06g0681200	4072.47	184.198	46.2332	2394.68	41.2826	227.977	4.17196	26.7079	18.5363	1689.34	10.3498	2.19755	30.5599	32.2217	30.0667	11.3962	24.5842	12.4553	2.6022e-05	0.00195967
Os03g0194900	1101.06	894.676	654.007	1019.66	632.14	569.436	560.085	377.249	510.675	3801.5	1580.42	2788.69	2468.66	1599.27	2354.87	2656.02	1921.67	1750.74	2.68889e-05	0.00201903
Os02g0170000	1620.33	3398.89	2750.88	1976.82	2565.54	2237.22	1923.27	2464.92	2382.84	1420.89	2202.44	1874.51	1185.15	2514.37	1886.69	1522.1	2451.25	1610.62	2.71516e-05	0.00203281
Os10g0569800	995.278	27.4104	92.4664	81.2513	36.1223	56.741	95.955	35.6105	20.3899	347.11	253.57	329.632	312.284	32.2217	313.553	213.678	159.797	145.571	2.73696e-05	0.00204317
Os07g0604000	2339.14	1297.06	952.597	1550.92	1112.05	1120.63	984.582	973.726	689.55	1162.28	1266.82	869.131	1492.66	1548.79	815.024	1386.06	831.766	846.958	2.75234e-05	0.0020487
Os03g0405900	1679.23	629.343	386.24	575.009	410.246	329.3	431.797	477.404	409.652	637.188	318.774	337.324	416.378	281.403	330.734	254.277	263.256	200.841	2.81809e-05	0.00209157
Os01g0118400	390.659	618.379	939.112	719.654	711.265	771.07	1062.81	1297.56	1631.19	902.684	657.213	1131.74	788.827	649.804	1145.76	1126.8	1283.5	1098.4	2.8661e-05	0.00212108
Os11g0514500	137.031	2.19283	3.85277	5.35723	1.72011	8.10586	6.25793	0	3.70726	168.147	80.7285	137.347	36.2899	8.59245	79.4621	27.0659	28.6816	94.9714	2.92878e-05	0.00216124
Os07g0105600	1449.64	1787.16	1904.23	1033.05	1418.23	996.007	1040.9	1608.04	1431	918.417	1060.85	877.921	776.412	1032.17	923.479	772.091	1019.22	787.017	2.98737e-05	0.00219815
Os11g0649700	562.549	149.113	136.773	183.932	120.408	87.1379	98.041	66.7698	87.1206	1338.29	719.311	1081.19	876.686	715.321	1305.76	1136.77	824.596	838.395	3.01321e-05	0.00221083
Os01g0952700	194.728	546.015	433.436	259.826	480.771	292.824	173.136	204.761	170.534	475.925	392.258	287.879	195.774	419.956	271.675	150.287	318.571	140.122	3.0711e-05	0.00224431
Os03g0785900	429.124	51.5316	73.2026	104.466	61.9239	66.8733	81.3531	90.1392	46.3408	284.178	65.2038	61.5314	205.324	51.5547	57.9859	44.8724	64.5336	43.5934	3.07729e-05	0.00224431
Os04g0653700	39.6669	3.28925	3.85277	0	0	2.02646	0	0	0	16.7164	20.6996	46.1485	5.72998	0	15.0334	11.3962	2.04868	16.3475	3.08505e-05	0.00224431
Os01g0268600	225.981	103.063	79.9449	209.825	155.67	115.508	148.104	75.6724	115.852	839.751	375.698	588.943	644.622	520.917	458.518	1083.35	509.098	503.66	3.10147e-05	0.00224988
Os02g0799600	1103.46	253.272	316.89	385.72	237.375	196.567	186.695	203.648	225.216	304.828	129.373	212.063	210.099	133.183	163.219	376.074	61.4605	101.199	3.15895e-05	0.0022787
Os06g0246500	120.203	30.6997	42.3804	174.11	10.3207	24.3176	12.5159	8.90264	7.41452	173.064	5.1749	13.1853	3.81998	11.8146	4.29525	0	2.04868	6.22763	3.15019e-05	0.0022787
Os10g0456800	1359.49	967.039	493.154	996.445	891.877	555.251	461.001	573.107	422.628	1505.46	1271.99	1258.1	1708.49	1648.68	792.474	1418.11	1236.38	1048.58	3.21194e-05	0.00231044
Os01g0261200	890.702	651.271	449.811	759.834	546.995	512.695	584.074	390.603	506.041	1926.31	701.717	795.513	1270.14	763.654	793.547	1900.31	540.853	594.739	3.27973e-05	0.00233954
Os02g0668500	2908.91	419.927	224.424	464.293	332.841	300.93	207.555	152.458	189.07	597.856	454.356	475.769	635.072	675.581	447.78	470.092	584.9	393.898	3.27783e-05	0.00233954
Os08g0205800	1578.26	1117.25	684.829	1219.66	544.415	394.147	490.205	535.271	652.478	1272.41	577.519	428.522	766.862	417.808	540.128	1152.44	475.295	377.55	3.26698e-05	0.00233954
Os01g0191200	11025	9425.89	7131.47	6202.78	7752.53	6843.37	4557.86	7931.14	5339.38	3127.93	3585.17	2236.01	3965.14	3960.05	2733.93	2277.81	3005.42	1806.79	3.34419e-05	0.00237891
Os01g0392600	81.7378	31.7961	13.4847	104.466	77.4049	64.8468	55.2784	20.0309	30.5849	245.829	136.617	231.841	317.059	182.59	242.682	348.295	121.897	126.888	3.37358e-05	0.00239319
Os08g0313200	2083.11	2661	2401.24	1767.89	2347.09	1870.43	1950.39	2423.74	2383.77	1586.09	1855.72	1698.71	1521.31	2130.93	2093.93	1641.76	2167.51	1780.32	3.39369e-05	0.00240083
Os12g0512100	150.253	57.0137	42.3804	57.1438	18.9212	31.4102	16.6878	18.9181	4.63408	88.4984	27.9445	15.3828	63.0297	53.7028	36.5096	6.41035	21.5112	17.9044	3.42156e-05	0.0024139
Os07g0192000	623.852	328.925	211.902	544.652	164.27	201.633	123.073	173.601	131.608	553.607	49.6791	230.743	220.604	85.9245	105.234	138.891	88.0935	84.8515	3.45648e-05	0.00243185
Os01g0246700	497.639	435.277	281.252	936.622	293.279	313.089	201.297	201.422	206.68	2712.97	471.951	1096.58	1457.32	590.731	1073.81	2292.77	535.731	508.331	3.46805e-05	0.00243332
Os07g0584100	906.328	331.118	215.755	322.327	199.533	147.932	138.718	224.792	192.778	757.153	301.179	349.41	437.388	247.033	332.882	396.729	206.917	274.794	3.56379e-05	0.00249368
Os01g0281000	1567.44	3050.23	2501.41	1792.89	2401.27	1725.53	1613.5	1911.84	1920.36	1338.29	2012	1804.19	1295.93	2227.59	2373.13	1158.85	2022.05	1488.4	3.61859e-05	0.00252514
Os01g0667900	587.791	278.49	260.062	287.505	271.777	299.917	187.738	191.407	151.071	683.404	264.955	259.311	599.738	347.994	241.608	626.077	166.968	144.014	3.64596e-05	0.00253735
Os05g0548900	985.662	3102.86	6737.53	1625.03	4287.37	3090.36	4176.13	4950.98	8505.38	285.161	807.285	432.917	444.073	1047.2	769.924	609.695	1630.75	776.119	3.65588e-05	0.00253738
Os11g0533400	62.5054	4.38567	0	53.5723	10.3207	2.02646	0	0	0	37.366	0	0	1.90999	2.14811	0	0	0	0	3.67623e-05	0.00254026
Os03g0197200	74.5257	10.9642	11.5583	35.7149	20.6413	9.11909	3.12897	7.78981	2.78045	32.4494	7.24486	7.69142	20.0549	9.66651	16.1072	12.8207	1.02434	0.778454	3.67981e-05	0.00254026
Os01g0214500	768.095	108.545	40.4541	233.932	43.8628	37.4896	59.4504	47.8517	67.6575	170.114	79.6935	107.68	140.384	89.1467	127.784	92.5939	57.3632	59.941	3.72523e-05	0.00256472
Os01g0135700	769.297	122.799	152.184	168.753	129.868	112.469	71.9662	136.878	196.485	541.807	103.498	93.3958	572.043	105.258	146.038	883.203	129.067	116.768	3.78333e-05	0.00259202
Os10g0465700	1904.01	1433.02	561.541	616.081	620.959	319.168	306.639	668.81	353.117	323.511	261.85	210.965	134.654	213.737	205.098	147.438	255.061	154.134	3.78508e-05	0.00259202
Os07g0664600	593.801	123.895	19.2638	314.291	92.8859	119.561	64.6653	34.4977	25.9508	285.161	146.967	227.446	236.839	122.442	233.017	212.966	90.1421	126.11	3.83588e-05	0.00261983
Os10g0554200	932.773	635.922	407.43	965.194	741.367	617.058	517.323	408.408	318.824	803.369	778.305	672.45	970.276	852.801	529.39	789.185	413.834	650.788	3.86656e-05	0.00263378
Os05g0344200	12936.2	3529.36	3232.47	4083.1	3095.34	2729.65	1711.54	2082.1	1602.46	5730.76	5744.14	5622.43	6601.89	7633.32	5081.28	5834.84	6762.71	5098.88	4.02229e-05	0.00273261
Os07g0635300	173.092	139.245	95.356	283.04	178.891	149.958	96.998	76.7852	95.462	390.376	153.177	316.447	289.364	99.8872	281.339	237.895	94.2395	109.762	4.09829e-05	0.00277689
Os10g0401000	444.75	37.2782	37.5645	41.965	44.7228	42.5557	34.4186	45.626	18.5363	100.298	64.1688	54.9387	124.149	75.1839	37.5834	109.688	45.0711	45.9288	4.14548e-05	0.00280147
Os01g0235100	1484.5	1541.56	1449.6	937.515	1359.75	966.623	1036.73	1436.66	1310.52	806.319	1156.07	957.033	817.477	1162.13	1084.55	878.93	1173.9	947.379	4.1603e-05	0.00280411
Os05g0373900	167.082	75.6527	59.7179	402.685	29.2419	46.6087	18.7738	22.2566	14.829	307.778	6.20988	24.173	9.54996	21.4811	21.4762	14.9575	20.4868	17.126	4.21988e-05	0.00283682
Os06g0110200	42.0709	37.2782	36.6013	43.7507	10.3207	6.07939	12.5159	2.22566	1.85363	11.7998	0	0	0	0	0	1.42452	0	0	4.2815e-05	0.00287073
Os01g0850900	3787.59	1086.55	570.21	686.618	645.901	507.629	447.442	574.22	412.433	902.684	374.663	284.583	531.933	468.288	488.585	232.909	407.688	255.333	4.48617e-05	0.00299234
Os10g0162100	798.146	334.407	139.663	146.431	122.988	121.588	112.643	146.893	110.291	117.998	105.568	110.976	147.069	154.664	157.85	117.523	88.0935	109.762	4.47903e-05	0.00299234
Os07g0176900	4175.84	7585.01	8778.53	4668.83	7337.13	5704.5	6038.91	8260.53	8393.24	3410.14	5788.65	4781.87	3441.81	6019.01	5477.52	4589.1	7303.56	4381.92	4.50852e-05	0.00299945
Os01g0795700	216.365	32.8925	13.4847	26.7861	8.60055	4.05293	0	4.45132	5.56089	94.3983	48.6441	70.3216	25.7849	19.333	32.2144	14.2452	0	20.2398	4.54466e-05	0.00301568
Os02g0799700	2131.19	763.106	736.842	783.048	631.28	447.849	491.248	610.943	410.579	731.587	489.546	597.733	642.712	765.802	579.859	1047.02	684.261	519.229	4.61747e-05	0.0030561
Os06g0716100	5847.86	3223.46	3967.39	3100.05	3054.91	1832.94	1135.81	2229	1369.83	1993.18	2913.47	2201.94	2138.24	4160.89	3159.16	1640.34	2926.55	1570.14	4.64427e-05	0.00306594
Os03g0279950	450.76	609.608	797.523	378.578	583.977	452.915	537.139	773.416	659.892	409.059	748.291	587.844	349.529	614.36	505.766	448.012	615.63	432.042	4.73404e-05	0.00311719
Os03g0802200	275.264	206.126	90.54	119.645	86.0055	97.2703	103.256	97.929	87.1206	235.996	93.1482	136.248	152.799	89.1467	68.724	122.509	57.3632	84.8515	4.78217e-05	0.00314082
Os11g0216100	3417.36	5425.07	3558.99	3592.02	4331.24	3060.97	2823.37	4481.36	3745.26	2832.93	3296.41	2481.03	2601.41	4358.52	3590.83	3093.35	5070.5	2904.41	4.82694e-05	0.00316214
Os09g0344500	1209.24	210.512	46.2332	1152.7	37.8424	18.2382	29.2037	20.0309	34.2922	346.127	213.206	51.6424	83.0847	4.29622	25.7715	25.6414	2.04868	32.6951	4.88611e-05	0.00319275
Os06g0146600	76.9297	42.7602	8.66873	30.3576	8.60055	6.07939	6.25793	11.1283	6.48771	36.3827	13.4547	3.29632	48.7048	1.07406	8.5905	15.6697	1.02434	2.33536	5.14613e-05	0.00335413
Os10g0536400	391.861	194.066	109.804	122.323	142.769	177.316	127.245	70.1083	78.7793	1455.31	317.739	772.439	644.622	137.479	525.094	603.997	238.672	327.729	5.24415e-05	0.00340936
Os03g0317300	0	4.38567	2.88958	7.14297	5.16033	12.1588	14.6018	28.9336	27.8045	20.6496	26.9095	43.951	20.0549	32.2217	23.6239	45.5847	43.0224	29.5813	5.26024e-05	0.00341119
Os03g0251425	122.607	96.4846	135.81	182.146	171.151	167.183	212.77	269.305	330.873	36.3827	102.463	115.371	91.6796	104.183	142.817	210.117	177.211	175.931	5.27925e-05	0.00341489
Os03g0184550	139.435	160.077	26.0062	233.932	62.784	56.741	54.2354	24.4822	17.6095	244.846	144.897	147.236	275.994	274.958	122.415	220.089	106.532	158.805	5.31215e-05	0.00342754
Os09g0434500	8512.76	13628.5	12904.8	8564.42	9368.58	10015.8	12459.5	13202.6	14447.2	18222.8	19302.4	26948.5	18160.2	23116.9	30501.6	23439.8	29440.6	28454.8	5.34944e-05	0.00344295
Os07g0469200	3519.54	475.845	392.982	489.294	448.949	463.047	302.467	316.044	231.704	505.424	327.054	305.459	430.703	458.622	329.66	386.758	442.516	251.441	5.39597e-05	0.00346421
Os01g0734000	149.051	221.476	78.0185	89.2871	70.5245	39.516	34.4186	66.7698	46.3408	204.53	142.827	45.0498	90.7246	63.3693	36.5096	56.9809	48.1441	66.1686	5.48646e-05	0.00351352
Os07g0669650	352.194	51.5316	44.3068	53.5723	36.1223	35.4631	20.8598	35.6105	37.9994	230.096	56.9239	83.5069	134.654	80.5542	142.817	177.353	75.8013	85.63	5.63296e-05	0.00359837
Os04g0340300	14.4243	43.8567	73.2026	94.6444	48.1631	95.2438	263.876	231.469	164.046	243.862	706.892	1013.07	297.004	239.515	146.038	259.263	164.919	414.138	5.65219e-05	0.00360169
Os02g0533800	4257.58	1689.58	645.339	2337.54	910.798	639.349	616.406	781.206	506.041	3017.8	1281.31	1744.85	2650.11	1909.67	1912.46	1414.55	1255.84	1511.76	5.6746e-05	0.00360702
Os04g0556300	2039.84	452.82	272.583	468.758	304.459	215.818	285.779	365.008	271.557	635.222	241.15	316.447	433.568	295.365	376.908	388.182	273.499	271.681	5.71161e-05	0.00362159
Os01g0725000	1199.62	175.427	186.859	187.503	172.011	216.832	125.159	184.73	187.217	589.989	149.037	169.211	497.553	200.849	238.386	611.12	146.481	147.128	5.74714e-05	0.00363514
Os01g0295700	812.57	525.183	366.976	734.833	503.992	341.459	441.184	426.214	442.091	946.933	408.817	455.991	802.197	562.805	419.861	888.189	318.571	375.993	5.85198e-05	0.00366939
Os01g0944100	1048.17	2392.38	805.228	2403.61	1210.96	642.389	816.66	578.671	747.94	659.805	40.3642	52.7412	87.8596	53.7028	34.362	163.108	22.5355	26.4674	5.86174e-05	0.00366939
Os03g0817200	581.781	692.935	204.197	636.617	253.716	224.937	138.718	76.7852	143.656	1100.33	460.566	543.893	493.733	654.1	430.599	549.153	498.855	441.384	5.87269e-05	0.00366939
Os04g0665600	1180.39	532.858	408.393	756.262	552.155	563.357	402.594	392.829	364.238	1147.53	679.982	719.697	1071.51	882.874	714.085	1338.34	460.954	642.225	5.84764e-05	0.00366939
Os04g0667600	920.753	357.432	269.694	331.255	244.256	238.11	306.639	343.864	330.873	1330.43	445.042	540.597	1066.73	473.659	595.966	1381.07	450.711	270.902	5.87274e-05	0.00366939
Os03g0298300	1153.95	901.254	744.547	976.801	592.578	589.701	548.612	617.62	466.188	510.341	330.159	302.163	391.548	419.956	234.091	328.352	324.717	282.579	5.89233e-05	0.00367269
Os02g0650900	27.6466	24.1212	12.5215	5.35723	10.3207	22.2911	13.5589	7.78981	15.7559	61.9489	46.5741	136.248	20.0549	10.7406	30.0667	24.2169	7.1704	24.1321	5.92473e-05	0.00368395
Os04g0688300	91.3541	51.5316	260.062	176.789	200.393	182.382	350.444	287.11	453.213	860.401	1101.22	1914.07	755.402	599.323	690.461	1212.27	948.541	1164.57	6.0531e-05	0.00375468
Os03g0233000	7.21216	9.86775	1.92638	8.92871	10.3207	6.07939	18.7738	35.6105	14.829	74.732	175.947	105.482	104.095	266.366	268.453	105.415	213.063	182.158	6.07451e-05	0.00375888
Os06g0133400	490.427	70.1706	31.7853	33.9291	29.2419	32.4234	10.4299	27.8207	50.048	195.68	41.3992	107.68	161.394	60.1471	85.905	207.98	49.1684	52.9349	6.19422e-05	0.00381457
Os07g0683200	542.114	211.608	140.626	974.123	184.052	157.051	153.319	153.57	91.7547	1251.76	1054.65	1259.2	993.196	819.505	874.083	1079.79	417.932	643.782	6.18739e-05	0.00381457
Os01g0871600	1766.98	4848.35	1120.19	131.252	1504.24	751.818	79.2672	121.298	46.3408	1713.92	1165.39	463.683	266.444	1395.2	335.029	2.84904	705.772	15.5691	6.21041e-05	0.00381539
Os03g0439000	62.5054	32.8925	10.5951	59.8224	15.481	16.2117	31.2897	14.4668	14.829	66.8655	24.8395	6.59265	27.6949	17.1849	23.6239	32.0517	12.2921	7.00609	6.26075e-05	0.00383714
Os07g0147550	823.388	72.3635	3.85277	67.8582	18.9212	26.344	17.7308	4.45132	10.195	50.1491	53.819	45.0498	40.1098	47.2585	44.0263	43.4479	46.0954	78.6239	6.28866e-05	0.00384507
Os11g0702100	67.3135	70.1706	15.4111	566.081	1.72011	0	0	2.22566	0.926815	816.152	16.5597	13.1853	32.4699	0	4.29525	2.84904	2.04868	3.11382	6.37996e-05	0.00389162
Os02g0783625	382.245	449.531	66.4602	790.191	76.5449	115.508	64.6653	77.8981	49.1212	618.505	235.976	207.668	161.394	196.552	148.186	154.561	68.6309	111.319	6.43955e-05	0.00391866
Os01g0827800	0	0	0	0	3.44022	4.05293	0	0	0	33.4327	55.8889	162.619	16.2349	62.2953	141.743	81.1977	96.2882	154.134	6.4743e-05	0.0039305
Os10g0173000	604.62	267.526	194.565	254.468	166.851	158.064	104.299	164.699	115.852	169.13	31.0494	30.7657	52.5248	25.7773	25.7715	48.4337	49.1684	11.6768	6.49033e-05	0.00393093
Os02g0124501	18.0304	32.8925	25.043	76.7869	77.4049	37.4896	14.6018	62.3184	69.5111	5.89989	7.24486	8.7902	11.46	6.44434	4.29525	22.0801	65.5579	30.3597	6.57294e-05	0.003953
Os05g0217800	3496.7	2439.53	3556.1	1542.88	2135.52	1164.2	2244.51	5366.06	5223.53	2503.52	4294.13	3285.34	1001.79	2467.11	2528.83	827.647	2962.4	1845.72	6.57131e-05	0.003953
Os06g0253100	373.83	172.137	235.019	55.358	98.0462	85.1115	110.557	136.878	132.535	76.6986	103.498	103.285	55.3898	57.999	80.5359	42.0234	81.9474	56.0487	6.55423e-05	0.003953
Os10g0574700	258.436	108.545	95.356	108.93	77.4049	78.0189	60.4934	82.3494	63.9502	257.629	77.6235	106.581	154.709	93.4429	112.75	173.792	85.0204	77.8454	6.60029e-05	0.00396017
Os01g0511000	441.144	190.776	149.295	176.789	139.329	146.919	296.209	331.623	197.412	1010.85	573.379	773.537	1300.7	528.436	658.247	1570.53	775.427	1018.22	6.7147e-05	0.00401008
Os06g0698300	430.326	117.317	86.6873	483.043	36.9824	81.0586	44.8485	63.4313	50.9748	239.929	72.4486	59.3338	41.0648	45.1104	50.4692	55.5563	29.7059	53.7133	6.71071e-05	0.00401008
Os03g0437200	9.61622	6.5785	0	0	0	0	4.17196	0	0	181.913	28.9795	114.273	178.584	19.333	62.2811	241.456	8.19474	24.9105	6.85386e-05	0.00408369
Os09g0321900	283.678	137.052	82.8345	140.181	77.4049	83.085	41.7196	31.1592	58.3893	99.3149	78.6585	85.7044	72.5797	74.1099	79.4621	62.6789	66.5823	59.1625	6.87772e-05	0.00408842
Os01g0128000	112.991	25.2176	3.85277	53.5723	15.481	6.07939	6.25793	4.45132	0	126.848	20.6996	25.2718	11.46	11.8146	23.6239	15.6697	6.14605	20.2398	6.94072e-05	0.00411634
Os01g0584900	346.184	129.377	17.3375	32.1434	32.6821	38.5028	25.0317	15.5796	7.41452	249.762	94.1832	303.262	136.564	61.2212	201.877	86.8958	86.0448	102.756	7.06363e-05	0.00416998
Os05g0541100	55.2932	32.8925	23.1166	64.2867	10.3207	22.2911	25.0317	14.4668	11.1218	104.231	23.8045	46.1485	22.9199	19.333	30.0667	53.4196	24.5842	26.4674	7.06092e-05	0.00416998
Os05g0576500	125.011	37.2782	38.5277	47.3222	29.2419	28.3705	18.7738	8.90264	16.6827	264.512	139.722	291.175	182.404	124.591	235.165	221.513	271.451	210.961	7.0857e-05	0.00417341
Os03g0207400	593.801	195.162	142.552	298.219	185.772	127.667	155.405	161.36	150.144	775.836	281.515	477.967	529.068	292.143	420.934	582.629	295.011	270.124	7.10854e-05	0.00417729
Os10g0161800	6112.31	1721.37	1130.79	1294.66	1133.55	1237.16	1059.68	1355.43	853.597	1237.99	747.256	735.08	1326.49	1257.72	1199.45	1051.3	806.158	607.973	7.20318e-05	0.00420901
Os05g0189900	597.407	634.825	1532.44	449.114	971.862	735.606	1147.29	1438.89	1409.69	368.743	1031.88	848.254	487.048	751.839	958.914	982.92	1522.17	1108.52	7.22809e-05	0.00420901
Os07g0635500	85.3439	217.09	55.8651	199.11	81.7052	56.741	67.7943	76.7852	59.3162	350.06	72.4486	62.6301	252.119	104.183	45.1001	109.688	51.2171	17.126	7.22052e-05	0.00420901
Os08g0334900	45.677	92.099	5.77915	125.895	55.0435	22.2911	6.25793	28.9336	12.9754	202.563	53.819	14.2841	21.9649	6.44434	6.44287	4.27356	0	7.78454	7.21693e-05	0.00420901
Os06g0530600	119.001	8.77133	8.66873	37.5006	1.72011	1.01323	2.08598	8.90264	0.926815	198.63	32.0844	185.693	253.074	32.2217	140.669	386.045	40.9737	84.0731	7.24829e-05	0.00421122
Os01g0159800	472.397	96.4846	69.3498	145.538	80.8451	36.4764	35.4616	66.7698	51.9016	153.397	43.4692	72.5191	69.7147	25.7773	55.8382	31.3395	25.6086	31.1382	7.47368e-05	0.00432262
Os04g0481300	449.558	405.674	362.16	164.288	291.559	236.083	209.641	342.751	278.045	124.881	216.311	141.742	153.754	221.256	208.32	134.617	235.599	140.9	7.4628e-05	0.00432262
Os06g0147000	971.238	242.308	132.92	189.289	122.988	85.1115	65.7083	152.458	79.7061	54.0824	71.4136	52.7412	82.1297	133.183	109.529	63.3912	62.4849	35.8089	7.60983e-05	0.00439147
Os06g0695800	257.234	91.0026	56.8283	43.7507	51.6033	43.569	31.2897	48.9645	38.9262	164.214	107.638	92.2971	131.789	86.9986	105.234	112.537	92.1908	81.7377	7.65261e-05	0.00439723
Os07g0513000	16512.2	26501.5	26071.7	15302.9	22162.7	16557.2	17905	22385.7	25303.9	13658.3	20153.1	18180.3	11512.5	19507	20290.8	14859.9	22510.9	15587	7.65406e-05	0.00439723
Os02g0462800	61.3034	10.9642	0	8.92871	3.44022	4.05293	8.34391	2.22566	3.70726	74.732	0	4.3951	55.3898	2.14811	1.07381	51.2828	4.09737	0	7.69623e-05	0.00441159
Os05g0576600	334.164	35.0853	50.086	79.4656	34.4022	50.6616	38.5906	48.9645	40.7799	543.773	105.568	508.733	327.564	92.3688	300.667	292.027	117.799	111.319	7.75158e-05	0.00443342
Os01g0612200	1038.55	703.899	970.897	863.407	883.276	1149.01	1527.98	1353.2	1603.39	792.552	987.371	852.649	1207.12	934.429	1124.28	1052.01	1053.02	1311.7	7.82577e-05	0.00446591
Os12g0208900	403.881	387.035	358.307	278.576	342.302	298.903	239.887	340.526	253.021	218.296	399.502	338.423	238.749	430.697	308.184	177.353	284.767	207.847	7.93129e-05	0.00451609
Os03g0782200	3667.38	7192.49	5528.72	1582.17	6389.35	2999.17	3217.62	3990.61	4097.45	871.217	2785.13	2236.01	700.967	2272.7	2592.18	675.935	4169.07	915.462	8.01066e-05	0.00455119
Os03g0278800	116.597	71.2671	72.2394	76.7869	62.784	60.7939	52.1494	41.1747	36.1458	63.9155	67.2737	48.3461	80.2197	54.7769	63.3549	55.5563	34.8276	41.2581	8.07982e-05	0.00458035
Os05g0462000	52.8892	47.1459	79.9449	91.9658	100.626	130.707	160.62	264.853	238.191	103.248	362.243	346.114	110.78	276.032	429.525	405.276	363.642	305.933	8.24989e-05	0.00466646
Os10g0529500	474.801	104.16	17.3375	87.5014	82.5652	45.5954	50.0635	74.5596	33.3653	149.464	14.4897	37.3583	106.96	23.6292	81.6097	22.7923	0	4.67073	8.42666e-05	0.00472482
Os02g0119600	122.607	44.9531	32.7485	101.787	31.822	50.6616	38.5906	51.1902	37.0726	141.597	49.6791	57.1363	113.645	61.2212	67.6502	108.264	26.6329	35.8089	8.41297e-05	0.00472482
Os04g0418500	871.47	165.559	177.227	202.682	179.751	212.779	132.46	190.294	199.265	794.519	212.171	350.509	713.382	219.107	286.708	1370.39	310.376	306.711	8.39792e-05	0.00472482
Os07g0273301	14.4243	99.7739	22.1534	16.0717	60.2038	26.344	4.17196	7.78981	7.41452	23.5996	12.4198	7.69142	7.63997	8.59245	2.14762	1.42452	6.14605	3.11382	8.39711e-05	0.00472482
Os02g0217900	31.2527	13.157	8.66873	3.57149	15.481	0	3.12897	0	0	3.93326	2.06996	0	14.3249	16.1108	6.44287	7.83487	7.1704	2.33536	8.49429e-05	0.00474957
Os02g0764500	1839.1	2469.13	2800.96	1216.09	2199.16	1543.15	1990.02	2612.92	2632.15	1114.1	2045.12	1698.71	959.771	1854.9	2034.87	1507.86	2171.61	1411.34	8.5078e-05	0.00474957
Os02g0570400	100.97	15.3498	3.85277	36.6077	2.58016	25.3308	5.21494	4.45132	3.70726	577.206	189.401	1410.83	201.504	49.4066	490.732	82.6222	83.9961	432.821	8.58052e-05	0.00476943
Os03g0218400	1598.7	1002.12	703.13	3093.8	989.063	945.345	837.52	1088.35	732.184	4201.71	958.392	2134.92	1463.05	654.1	1621.46	1369.68	716.015	842.288	8.57958e-05	0.00476943
Os05g0217700	20432.1	27961.9	17569.6	11077	19910.3	12006.8	11605.3	22840.8	15725.3	1224.23	6572.13	3217.21	1692.25	5668.87	3958.07	700.865	7064.89	1731.28	8.73976e-05	0.00484745
Os04g0403600	494.033	115.124	46.2332	108.037	55.0435	32.4234	45.8915	90.1392	23.1704	84.5651	27.9445	39.5559	47.7498	64.4434	31.1406	19.9433	23.5599	21.0183	8.94168e-05	0.00494876
Os06g0554600	337.77	494.484	379.498	249.111	438.628	269.52	369.218	618.733	331.8	78.6652	91.0783	102.186	103.14	139.627	147.112	61.2544	110.629	86.4084	9.14176e-05	0.00504861
Os10g0416800	438.74	426.506	242.724	1308.06	249.416	206.699	244.059	201.422	185.363	2002.03	923.203	1163.6	776.412	442.511	699.052	630.351	543.926	685.04	9.52619e-05	0.00523806
Os03g0184100	123.809	95.3882	102.098	164.288	88.5856	121.588	74.0522	76.7852	88.9742	178.963	60.0289	35.1608	84.9947	99.8872	53.6906	19.9433	20.4868	21.7967	9.54382e-05	0.00523806
Os07g0537600	70.9196	40.5674	60.6811	129.466	48.1631	70.9262	85.5251	45.626	67.6575	724.703	397.432	617.511	543.393	437.141	492.88	864.685	511.147	453.839	9.54599e-05	0.00523806
Os09g0458800	389.457	85.5205	87.6505	185.717	151.37	45.5954	38.5906	62.3184	33.3653	89.4817	61.0638	74.7167	116.51	158.96	63.3549	133.905	80.9231	60.7194	9.8304e-05	0.00538262
Os07g0530700	1375.12	1098.61	1006.54	756.262	809.311	709.262	537.139	885.812	689.55	483.791	534.05	398.855	420.198	596.101	396.237	277.782	445.589	312.16	9.8853e-05	0.00540116
Os04g0586000	310.123	111.834	187.822	166.074	127.288	139.826	256.575	381.7	453.213	160.28	128.338	164.816	124.149	98.8132	172.884	357.555	183.357	196.17	0.000100367	0.00547224
Os07g0689600	216.365	84.4241	453.663	94.6444	443.788	775.122	1024.22	1746.03	1633.05	32.4494	110.743	134.05	196.729	86.9986	124.562	217.952	227.404	224.973	0.000100759	0.00548196
Os02g0463401	304.113	4.38567	23.1166	16.0717	5.16033	14.1852	10.4299	0	11.1218	42.2826	10.3498	4.3951	1.90999	3.22217	2.14762	7.83487	14.3408	14.0122	0.000102268	0.00555232
Os01g0867300	373.83	252.176	226.35	417.864	208.133	197.58	228.415	174.714	169.607	612.606	406.747	460.387	453.623	375.92	399.458	468.668	371.836	451.503	0.000103099	0.00558562
Os03g0114100	135.829	37.2782	26.9694	17.8574	12.0408	22.2911	36.5046	36.7234	29.6581	50.1491	51.749	27.4694	108.87	85.9245	66.5764	121.797	60.4362	90.3007	0.0001034	0.00559015
Os05g0496000	322.143	80.0384	53.9387	167.86	110.947	58.7675	58.4074	41.1747	43.5603	144.547	86.9384	63.7289	97.4096	88.0726	67.6502	93.3062	97.3125	88.7438	0.000103701	0.00559461
Os02g0682300	106.98	67.9778	15.4111	205.36	55.0435	28.3705	32.3327	35.6105	45.4139	403.159	69.3437	98.8897	204.369	77.332	93.4217	205.843	88.0935	74.7316	0.000104109	0.00560485
Os03g0820300	213.961	150.209	36.6013	130.359	39.5625	24.3176	43.8055	34.4977	33.3653	37.366	12.4198	32.9632	46.7948	21.4811	30.0667	28.4904	6.14605	7.78454	0.00010454	0.00561631
Os04g0521700	84.1419	30.6997	42.3804	71.4297	30.1019	30.397	38.5906	8.90264	16.6827	36.3827	6.20988	8.7902	21.0099	15.0368	17.181	14.2452	12.2921	12.4553	0.000104868	0.00562215
Os02g0574500	1462.87	793.805	340.97	902.693	548.715	401.24	424.497	328.285	373.506	831.885	630.303	706.512	674.227	614.36	439.189	410.262	444.565	386.892	0.000105942	0.00566789
Os12g0552400	326.951	178.716	134.847	254.468	136.749	133.747	102.213	82.3494	127.9	490.674	183.192	298.867	313.239	266.366	271.675	417.385	182.333	286.471	0.000108481	0.00575042
Os03g0760200	3566.41	6110.33	2336.7	5259.91	3733.5	3258.55	1813.76	2559.51	2152.06	6470.22	1267.85	1582.24	4966.93	5847.16	1975.81	1449.45	1123.7	862.527	0.000108043	0.00575042
Os06g0571800	1666.01	1598.58	1046.03	1522.35	1523.16	1266.54	1831.49	1721.55	1715.53	1061	910.783	1008.68	1183.24	762.58	873.009	2340.49	1172.87	1558.47	0.000108177	0.00575042
Os08g0140300	69.7176	13.157	0	23.2147	0	4.05293	0	0	0	269.428	128.338	484.56	94.5446	57.999	148.186	63.3912	73.7527	103.534	0.000107983	0.00575042
Os09g0367700	276.466	77.8456	5.77915	90.18	12.0408	30.397	39.6336	13.354	16.6827	122.914	0	4.3951	133.699	60.1471	6.44287	1.42452	2.04868	4.67073	0.000108604	0.00575042
Os04g0655300	2216.54	1599.67	785.001	2200.93	1149.89	938.253	542.354	783.432	692.331	2709.03	721.381	1157.01	1518.44	984.91	1263.88	945.882	767.232	576.056	0.00011188	0.00591168
Os07g0684800	1174.38	607.415	304.369	858.049	434.328	292.824	271.177	258.176	212.241	919.4	374.663	507.634	459.353	359.809	569.121	403.14	307.303	396.233	0.000112736	0.00594209
Os09g0454900	37.2628	24.1212	4.81596	9.82159	6.88044	7.09262	6.25793	3.33849	1.85363	23.5996	10.3498	4.3951	23.8749	28.9995	28.9929	12.8207	9.21908	5.44918	0.000112918	0.00594209
Os02g0733900	152.657	15.3498	9.63192	42.8578	7.74049	4.05293	2.08598	15.5796	5.56089	119.964	8.27984	17.5804	61.1197	2.14811	12.8857	188.037	0	1.55691	0.000113882	0.00598055
Os06g0683400	320.941	52.628	102.098	74.1083	31.822	62.8204	68.8373	42.2875	215.948	491.658	149.037	171.409	458.398	122.442	165.367	862.548	99.3612	87.1869	0.000115858	0.00607191
Os05g0574600	177.9	205.03	70.313	262.504	92.8859	98.2835	96.998	122.411	59.3162	280.245	176.982	81.3093	203.414	113.85	103.086	106.839	118.824	77.8454	0.000116392	0.00608747
Os12g0147800	995.278	418.831	271.62	368.756	321.66	393.134	262.833	272.643	239.118	559.506	246.325	271.397	413.513	243.811	339.325	361.828	142.384	200.841	0.000116994	0.00610651
Os04g0649500	2246.59	634.825	331.338	790.191	414.546	334.367	314.983	333.849	263.215	802.385	645.828	553.782	616.927	570.324	380.13	474.366	487.587	585.398	0.000120358	0.00625667
Os06g0192800	205.547	26.314	28.8958	31.2505	6.88044	8.10586	10.4299	37.8362	50.048	242.879	101.428	151.631	200.549	42.9622	111.676	195.872	61.4605	64.6117	0.000120138	0.00625667
Os03g0775000	502.447	1441.79	667.492	518.758	741.367	506.616	520.452	697.744	620.966	321.544	492.651	359.299	260.714	615.434	648.583	241.456	749.819	354.975	0.000121582	0.00630755
Os03g0626500	295.699	270.815	108.841	302.683	171.151	128.68	89.6971	152.458	97.3156	448.392	135.582	143.939	198.639	129.961	169.662	79.0609	65.5579	78.6239	0.000123014	0.00636893
Os05g0460000	1062.59	960.461	583.694	875.014	572.796	587.675	459.958	600.928	378.141	519.191	169.737	123.063	427.838	133.183	125.636	132.48	140.335	101.199	0.00012406	0.00640544
Os06g0323100	1095.05	337.696	42.3804	385.72	74.8248	69.913	54.2354	66.7698	27.8045	583.106	317.739	499.942	336.159	192.256	439.189	207.268	226.38	223.416	0.000124218	0.00640544
Os11g0601700	251.224	84.4241	147.368	381.256	110.087	133.747	305.596	321.608	333.653	165.197	100.393	213.162	238.749	196.552	338.251	583.342	201.795	283.357	0.000125529	0.00644719
Os03g0118450	532.498	142.534	134.847	129.466	102.347	109.429	67.7943	101.267	69.5111	197.646	112.813	107.68	221.559	157.886	194.36	133.905	136.238	144.014	0.000125291	0.00644719
Os11g0704500	1860.74	445.145	182.043	431.257	241.675	152.998	184.609	243.71	153.851	599.822	394.328	428.522	401.098	309.328	416.639	280.631	309.351	283.357	0.00012742	0.00653122
Os02g0584700	233.193	49.3387	65.4971	44.6436	38.7025	41.5425	41.7196	66.7698	58.3893	563.44	178.017	120.865	469.858	110.628	188.991	483.625	165.943	203.955	0.000129415	0.00662026
Os05g0531000	1147.94	302.611	295.7	300.005	194.372	158.064	202.34	346.09	187.217	108.165	66.2387	37.3583	124.149	68.7396	120.267	123.933	34.8276	43.5934	0.000131743	0.00672595
Os06g0726200	1209.24	1674.23	440.179	4488.46	285.538	327.274	327.499	470.727	263.215	6371.88	1392.05	1293.26	894.831	509.103	921.331	1057.71	1007.95	839.174	0.000132756	0.00676423
Os07g0476900	14919.6	22870.1	21159.4	13110.9	17697.3	15657.5	14635.2	19978.6	21993.3	12952.2	14976.2	13209.5	10421.9	19275	17858.6	12003.7	20022.8	13688.3	0.000133257	0.00677631
Os10g0330400	3863.31	1223.6	337.117	417.864	535.814	439.743	219.028	477.404	205.753	884.984	1097.08	957.033	791.692	1407.01	1019.05	470.092	1071.46	659.351	0.000135437	0.00687358
Os01g0222600	31368.1	3431.78	1888.82	3607.2	2953.43	2087.26	1349.63	2311.35	1224.32	4453.44	3769.4	4207.21	3677.69	4783.85	3693.91	3497.2	4482.52	3109.15	0.000136296	0.00689176
Os02g0112900	36.0608	32.8925	0	19.6432	8.60055	4.05293	1.04299	0	0	85.5484	363.278	15.3828	1.90999	4.29622	19.3286	11.3962	0	3.11382	0.000136332	0.00689176
Os04g0385600	247.618	103.063	34.6749	72.3226	41.2826	72.9527	43.8055	36.7234	42.6335	176.013	45.5391	98.8897	210.099	97.7391	77.3145	222.225	98.3369	84.0731	0.000136654	0.00689446
Os01g0665900	488.023	69.0742	59.7179	53.5723	43.8628	66.8733	45.8915	51.1902	29.6581	91.4483	40.3642	58.2351	77.3547	61.2212	62.2811	74.0751	63.5092	48.2642	0.000137156	0.00690619
Os02g0807000	445.952	153.498	110.767	154.467	107.507	156.038	122.03	124.637	114.925	462.158	131.443	206.57	475.588	198.7	208.32	212.966	158.773	160.362	0.000138067	0.00692731
Os05g0550800	45.677	20.8319	26.9694	41.0721	18.9212	18.2382	20.8598	12.2411	16.6827	118.981	53.819	126.359	84.9947	40.8141	78.3883	81.1977	49.1684	47.4857	0.000138114	0.00692731
Os01g0866400	3550.79	10399.5	6680.7	4191.14	7135.87	4210.99	4132.32	5265.91	5631.33	4644.2	6542.11	5771.86	3280.41	6203.75	6628.64	3843.36	7254.39	4756.36	0.000138904	0.00695334
Os01g0124100	181.506	418.831	18.3006	258.04	25.8016	58.7675	10.4299	10.0155	10.195	878.101	237.011	460.387	197.684	192.256	394.089	158.122	111.653	193.057	0.000139613	0.00697521
Os12g0615400	7644.89	10763.5	10521.9	6626	9222.37	7787.7	7426.08	8407.43	9382.15	6765.21	8548.94	7147.53	5879.91	8436.71	8076.14	6483	8202.93	6933.69	0.000140214	0.00699164
Os03g0277300	57.6973	42.7602	34.6749	322.327	21.5014	4.05293	15.6448	40.0619	36.1458	687.338	70.3787	13.1853	16.2349	17.1849	26.8453	25.6414	24.5842	15.5691	0.000140571	0.00699586
Os01g0232000	114.193	370.589	137.736	110.716	169.431	49.6484	75.0952	103.493	122.34	30.4828	49.6791	28.5681	21.9649	47.2585	28.9929	22.7923	112.678	24.1321	0.000141301	0.00701861
Os01g0794400	830.601	340.986	199.381	491.079	162.55	209.739	110.557	180.278	96.3888	375.627	81.7635	119.766	113.645	98.8132	158.924	89.0326	79.8987	72.3962	0.000146718	0.0072736
Os03g0187600	379.841	81.1348	63.5707	72.3226	60.2038	73.9659	62.5793	77.8981	53.7553	178.963	68.3087	72.5191	108.87	74.1099	79.4621	210.829	60.4362	75.5101	0.00014798	0.00730792
Os04g0640300	74.5257	41.6638	44.3068	143.752	91.1658	122.601	73.0092	66.7698	148.29	92.4317	57.9589	85.7044	80.2197	62.2953	82.6836	48.4337	36.8763	66.9471	0.000147975	0.00730792
Os10g0463800	658.711	436.374	167.595	690.19	241.675	265.467	179.394	169.15	164.046	969.549	305.319	506.535	466.993	361.957	526.168	381.772	244.818	319.166	0.000149583	0.0073588
Os09g0553800	639.478	547.112	367.939	371.435	345.742	299.917	255.532	334.962	286.386	336.294	267.025	260.41	358.124	342.624	299.594	252.853	334.96	203.955	0.000149386	0.0073588
Os11g0428500	97.3642	43.8567	28.8958	70.5368	48.1631	33.4367	20.8598	28.9336	24.0972	2.94995	4.13992	4.3951	21.0099	10.7406	12.8857	7.83487	2.04868	1.55691	0.000149947	0.00736261
Os07g0527000	109.384	163.366	178.191	143.752	116.967	179.342	222.157	282.659	244.679	200.596	275.305	261.508	173.809	141.775	167.515	275.645	215.112	307.489	0.000150825	0.00739156
Os11g0437600	0	0	30.8221	0	1.72011	4.05293	10.4299	26.7079	24.0972	0	0	0	0	6.44434	6.44287	9.97165	68.6309	9.34145	0.000151416	0.00740643
Os03g0233900	38.4649	21.9283	23.1166	59.8224	15.481	16.2117	16.6878	20.0309	35.219	69.8154	8.27984	16.4816	19.0999	4.29622	4.29525	9.97165	0	6.22763	0.000151946	0.00741819
Os02g0822000	542.114	319.057	227.313	256.254	265.757	236.083	264.919	178.053	225.216	276.312	199.751	162.619	285.544	205.145	135.3	211.541	182.333	122.217	0.000153566	0.00748307
Os03g0266900	170.688	84.4241	66.4602	53.5723	43.0027	29.3837	60.4934	48.9645	40.7799	69.8154	49.6791	8.7902	51.5698	21.4811	15.0334	28.4904	22.5355	26.4674	0.000153948	0.00748746
Os03g0289800	3.60608	4.38567	4.81596	20.536	11.1807	25.3308	0	7.78981	3.70726	148.481	57.9589	63.7289	41.0648	23.6292	27.9191	40.5989	19.4625	10.1199	0.000156741	0.00760888
Os10g0479001	1393.15	469.266	334.228	375.006	320.8	209.739	234.673	359.444	272.484	501.491	326.019	269.2	299.869	234.144	275.97	310.546	265.305	249.105	0.000157121	0.00761298
Os01g0741900	463.982	237.922	97.2824	750.012	206.413	265.467	189.824	170.263	184.436	1187.85	560.959	919.674	1157.46	890.393	911.667	1957.29	621.776	720.849	0.00015785	0.00763386
Os11g0655900	1358.29	160.077	140.626	262.504	288.118	168.197	132.46	155.796	106.584	567.373	290.829	249.422	413.513	404.919	254.494	544.879	284.767	306.711	0.00015846	0.00764898
Os05g0355400	12569.6	4983.21	1517.03	3517.91	2584.46	2064.97	1085.75	1635.86	876.767	7018.91	6249.21	8634.17	5994.51	9880.24	6364.49	7436.71	9037.77	7340.82	0.000160461	0.00773101
Os08g0425800	4564.1	1804.7	1562.3	3280.41	1385.55	1590.77	1138.94	1454.47	1113.1	2061.03	630.303	523.017	862.361	791.579	633.549	626.077	658.652	531.684	0.000161808	0.00778135
Os03g0257500	0	0	3.85277	3.57149	5.16033	5.06616	25.0317	33.3849	14.829	9.83315	6.20988	19.7779	17.1899	15.0368	51.543	24.2169	10.2434	9.34145	0.000162272	0.00778907
Os05g0583100	33.6568	1.09642	4.81596	10.7145	3.44022	2.02646	10.4299	6.67698	1.85363	15.733	1.03498	0	8.59496	2.14811	0	5.69809	1.02434	0	0.000163072	0.0077999
Os08g0118900	522.882	186.391	381.424	445.543	343.162	500.537	576.773	655.457	693.258	223.213	215.276	271.397	417.333	321.143	513.282	467.243	493.733	448.39	0.000163105	0.0077999
Os06g0326400	2676.91	2698.28	2299.14	2911.65	2761.64	2269.64	2254.94	2173.36	2004.7	1740.47	2093.77	1760.24	2197.45	2244.78	1838.37	1940.91	1881.72	1393.43	0.000164234	0.00783929
Os08g0188151	1622.74	150.209	210.939	146.431	135.889	189.474	175.222	205.873	151.998	182.897	102.463	80.2105	235.884	263.144	182.548	174.504	101.41	119.882	0.000168361	0.00802133
Os08g0395700	1253.71	186.391	65.4971	430.364	151.37	62.8204	76.1382	129.088	44.4871	867.284	312.564	647.178	537.663	271.736	427.377	484.337	285.792	310.603	0.0001702	0.00809397
Os10g0344000	129.819	73.4599	40.4541	70.5368	110.087	28.3705	67.7943	82.3494	103.803	286.145	27.9445	108.779	258.804	56.925	63.3549	38.4621	6.14605	12.4553	0.000170613	0.0080986
Os03g0342900	14914.8	6133.35	5441.07	6843.86	5889.65	5665.99	4167.78	5098.98	3928.77	13249.2	7135.15	8270.48	10604.3	9464.58	8116.95	13386.2	8030.84	7337.71	0.000171088	0.00810616
Os12g0282000	1631.15	6134.45	975.713	223.218	1935.98	859.221	29.2037	48.9645	0	2249.83	1475.88	440.609	444.073	1726.01	416.639	0.712261	530.609	3.11382	0.000172267	0.00814698
Os01g0203000	239.203	191.873	249.467	234.825	223.614	189.474	374.433	264.853	360.531	514.274	377.768	470.276	479.408	308.254	488.585	676.648	365.69	476.414	0.000173239	0.00817792
Os08g0485900	688.761	1150.14	1405.3	592.867	1054.43	834.903	838.563	911.407	1018.57	476.908	1247.15	932.86	514.743	1117.02	925.626	573.37	1198.48	642.225	0.000174412	0.00821816
Os05g0420000	2232.16	274.104	224.424	250.004	199.533	233.043	180.437	209.212	151.071	352.027	356.033	318.645	418.288	454.326	395.163	363.253	362.617	270.902	0.000175896	0.00827293
Os12g0466200	9725.6	1459.33	887.1	1541.99	1311.58	946.359	634.137	1088.35	675.648	2189.84	1610.43	1611.9	1962.52	2087.97	1530.18	1979.37	1878.64	1473.61	0.000177555	0.00833568
Os07g0602900	885.894	435.277	360.234	348.22	320.8	269.52	216.942	314.931	282.679	272.378	216.311	146.137	302.734	240.589	140.669	314.107	179.26	142.457	0.000178583	0.00836862
Os04g0462500	682.751	439.663	320.743	282.147	393.045	320.181	256.575	222.566	180.729	475.925	500.931	437.312	458.398	586.435	367.244	540.606	403.591	390.784	0.000179723	0.00840673
Os03g0736900	9084.92	5391.08	4084.9	1507.17	4252.11	3618.25	1159.8	2296.88	1365.2	3765.11	3323.32	2138.22	2252.84	4270.45	2488.02	590.464	3524.76	923.247	0.00018028	0.00841578
Os05g0179950	2737.02	733.503	601.032	733.94	585.697	655.561	541.311	629.861	403.165	831.885	585.799	441.707	845.172	709.951	492.88	624.653	585.924	527.014	0.000180572	0.00841578
Os08g0404500	43.273	5.48208	3.85277	5.35723	3.44022	4.05293	4.17196	0	0	22.6163	25.8745	19.7779	38.1998	0	10.7381	12.8207	2.04868	1.55691	0.000184564	0.00858625
Os12g0586300	437.538	455.013	400.688	325.005	307.04	270.533	320.198	400.619	303.069	184.863	216.311	201.076	284.589	289.995	220.132	217.952	254.037	215.632	0.000185332	0.00860638
Os03g0844900	2105.95	3244.3	3319.16	1841.99	2797.76	1936.29	2202.79	2755.37	3212.34	1318.63	1926.1	1714.09	1118.3	1983.78	1903.87	1589.77	2334.48	1594.27	0.000187383	0.00868591
Os11g0242400	2392.03	4224.49	3796.9	2416.11	3350.77	2978.9	3009.02	3613.36	3781.41	2058.08	2628.85	2163.49	1787.75	2991.25	2614.73	2112.57	2997.23	2159.43	0.000188292	0.00871232
Os10g0529400	234.395	37.2782	9.63192	19.6432	6.88044	10.1323	6.25793	15.5796	10.195	20.6496	10.3498	26.3706	9.54996	9.66651	9.66431	5.69809	4.09737	7.00609	0.000189971	0.00872273
Os03g0135700	28.8486	35.0853	52.0124	67.8582	37.8424	64.8468	140.804	122.411	122.34	89.4817	176.982	173.606	101.23	86.9986	40.8049	170.23	191.552	126.888	0.000190215	0.00872273
Os05g0529700	899.116	1935.17	752.253	1181.27	815.332	671.773	431.797	523.03	413.36	1916.48	1041.19	909.785	897.696	1110.57	1043.75	636.761	1002.83	598.631	0.000189638	0.00872273
Os06g0473000	707.994	419.927	436.326	169.646	359.503	254.321	193.996	265.966	208.533	244.846	363.278	261.508	205.324	344.772	250.198	212.254	179.26	184.494	0.00018956	0.00872273
Os09g0553900	7204.95	11161.5	6816.51	6780.47	7717.27	6477.59	4993.83	6273.02	5405.19	5303.02	6097.07	4940.09	4504.72	7434.62	7066.76	3670.99	7287.17	4343.77	0.000189732	0.00872273
Os05g0522600	806.56	919.893	502.786	1153.59	561.616	555.251	397.379	329.398	379.067	3448.49	681.017	1900.88	1825.95	676.655	1296.09	1876.81	728.307	814.263	0.000190568	0.00872332
Os04g0617500	42.0709	4.38567	5.77915	12.5002	0	4.05293	4.17196	2.22566	5.56089	72.7653	10.3498	2.19755	41.0648	0	20.4024	165.244	9.21908	3.11382	0.000192334	0.00878851
Os02g0191300	720.014	753.238	279.326	1228.59	288.978	294.85	281.607	287.11	282.679	1106.23	496.791	549.387	795.512	496.214	365.096	663.827	334.96	415.695	0.000192873	0.00879748
Os11g0454000	137.031	70.1706	44.3068	161.61	25.8016	50.6616	31.2897	82.3494	39.853	55.0657	0	0	9.54996	0	0	0	0	0	0.00019455	0.00885821
Os03g0154000	1128.7	408.963	107.877	290.183	213.294	222.911	126.202	239.258	103.803	199.613	45.5391	26.3706	112.69	231.996	68.724	116.811	45.0711	34.252	0.000198264	0.00901134
Os03g0838800	31.2527	16.4462	4.81596	25.8933	14.6209	30.397	7.30092	8.90264	5.56089	83.5818	30.0144	27.4694	23.8749	11.8146	13.9596	19.9433	9.21908	16.3475	0.000199277	0.00904138
Os02g0125300	1218.86	166.655	192.638	156.253	153.95	138.813	192.953	237.033	180.729	336.294	196.646	204.372	291.274	180.441	179.327	358.979	115.751	204.733	0.000200802	0.00909454
Os05g0526700	225.981	13.157	16.3743	34.822	12.0408	22.2911	4.17196	15.5796	0	78.6652	18.6296	37.3583	36.2899	16.1108	17.181	41.3111	10.2434	14.0122	0.000202004	0.00913287
Os07g0412100	7803.56	14388.3	12670.8	7679.59	10133.2	7835.32	11325.8	12197.7	15928.2	3016.81	4546.67	3672.1	2780.95	4235	5142.49	4094.79	6418.53	4305.63	0.000206039	0.00929485
Os08g0293100	1623.94	142.534	216.718	167.86	208.993	289.784	196.082	189.181	163.119	574.256	282.55	305.459	768.772	263.144	234.091	662.402	289.889	319.166	0.000206311	0.00929485
Os05g0527000	67.3135	48.2423	23.1166	76.7869	22.3614	16.2117	4.17196	10.0155	30.5849	176.013	10.3498	52.7412	44.8848	4.29622	0	4.27356	4.09737	1.55691	0.000207666	0.00933951
Os08g0478466	182.708	107.449	68.3866	125.002	79.125	118.548	50.0635	60.0928	53.7553	189.78	86.9384	62.6301	166.169	82.7023	86.9788	135.33	82.9717	65.3902	0.000213946	0.00960514
Os12g0138050	137.031	21.9283	26.9694	17.8574	10.3207	14.1852	25.0317	22.2566	9.26815	66.8655	55.8889	76.9142	42.0198	38.666	62.2811	48.4337	16.3895	28.0244	0.000220872	0.00989877
Os12g0480100	601.013	649.079	407.43	288.397	374.124	265.467	324.37	500.773	405.018	306.794	420.202	401.053	234.929	390.956	370.465	336.899	489.636	323.059	0.000221826	0.0099242
Os10g0449400	158.668	46.0495	21.1902	37.5006	15.481	26.344	22.9458	17.8053	15.7559	37.366	14.4897	21.9755	32.4699	36.5179	47.2477	15.6697	16.3895	12.4553	0.00022486	0.0100424
Os07g0516300	1298.19	234.633	192.638	240.182	171.151	168.197	183.566	285.997	194.631	344.16	180.087	178.001	283.634	173.997	228.722	334.05	143.408	161.14	0.000227325	0.0101349
Os01g0699400	152.657	15.3498	44.3068	45.5364	30.962	8.10586	12.5159	20.0309	12.9754	92.4317	62.0988	59.3338	61.1197	41.8882	34.362	72.6506	35.852	26.4674	0.000231092	0.0102495
Os10g0537800	115.395	8.77133	0	3.57149	8.60055	0	6.25793	0	0	294.995	75.5536	161.52	103.14	27.9255	52.6168	102.566	78.8744	60.7194	0.000230351	0.0102495
Os11g0154900	143.041	338.793	145.442	48.2151	111.807	67.8865	20.8598	47.8517	34.2922	163.23	79.6935	92.2971	35.3349	100.961	92.3479	2.84904	107.556	22.5752	0.000230986	0.0102495
Os12g0529800	24.0405	153.498	183.006	95.5372	121.268	254.321	191.91	245.935	341.995	65.8821	146.967	132.952	121.285	180.441	173.958	103.99	270.426	161.14	0.000232461	0.0102924
Os08g0439600	244.011	93.1954	84.7609	110.716	90.3057	104.363	129.331	122.411	104.73	208.463	82.7984	64.8277	163.304	77.332	112.75	280.631	106.532	115.99	0.000236973	0.0104741
Os12g0584200	663.519	537.244	477.743	444.65	491.951	406.306	308.725	353.88	315.117	412.009	369.488	381.275	394.413	395.253	438.115	351.145	366.715	365.873	0.000238615	0.0105286
Os02g0569400	39.6669	10.9642	0	1.78574	0	2.02646	2.08598	0	0	54.0824	12.4198	214.261	12.4149	2.14811	92.3479	9.25939	2.04868	54.4918	0.000239993	0.0105712
Os01g0296100	1325.84	1215.93	887.1	1155.38	940.9	872.393	770.769	722.226	762.769	1240.94	1062.92	1066.91	1000.84	1059.02	970.726	1129.65	1002.83	959.834	0.000243229	0.0106771
Os01g0742400	64.9095	20.8319	36.6013	50.8937	36.1223	48.6351	27.1177	28.9336	25.024	936.116	76.5885	331.83	425.928	75.1839	213.689	670.237	54.2902	147.906	0.000243129	0.0106771
Os02g0510600	835.409	2141.3	1623.94	812.513	1424.25	1577.6	1246.37	1426.65	1365.2	681.438	961.497	907.588	772.592	1071.91	984.686	547.016	935.225	846.18	0.00024567	0.0107659
Os08g0501700	9.61622	4.38567	29.8589	12.5002	32.6821	50.6616	50.0635	75.6724	74.1452	47.1991	114.883	94.4946	47.7498	32.2217	36.5096	72.6506	61.4605	91.0791	0.00025024	0.0109475
Os07g0633200	937.581	257.658	192.638	436.614	195.232	215.818	139.761	229.243	125.12	283.195	51.749	87.902	148.024	90.2207	155.703	111.113	57.3632	64.6117	0.00025103	0.0109634
Os11g0133001	55.2932	21.9283	7.70554	148.217	8.60055	4.05293	18.7738	6.67698	1.85363	226.163	124.198	173.606	110.78	76.258	112.75	180.202	68.6309	98.0852	0.000252334	0.0109829
Os12g0576700	19.2324	24.1212	102.098	37.5006	91.1658	64.8468	128.288	115.734	173.314	350.06	433.657	746.068	301.779	322.217	866.567	585.478	522.415	568.272	0.000252157	0.0109829
Os02g0743200	747.661	122.799	130.031	101.787	106.647	98.2835	91.783	120.186	96.3888	383.493	242.185	264.805	298.914	165.405	274.896	427.356	272.475	252.219	0.000252828	0.0109858
Os09g0334500	1638.36	782.841	536.498	799.12	586.557	576.529	421.368	495.209	458.773	2871.28	898.363	1461.37	1997.85	990.28	1647.23	1990.06	1207.7	1033.79	0.000255714	0.0110925
Os07g0123900	921.955	260.947	209.976	203.575	201.253	122.601	173.136	146.893	179.802	371.693	163.527	203.273	248.299	202.997	296.372	262.824	205.893	220.303	0.000256608	0.0111125
Os05g0491200	1214.05	501.062	225.387	657.153	456.689	360.711	286.822	352.767	170.534	1027.56	812.46	869.131	1029.49	906.503	623.885	974.373	637.141	667.914	0.000257553	0.0111346
Os09g0517600	69.7176	198.451	218.645	132.145	190.932	265.467	228.415	193.632	264.142	81.6152	159.387	195.582	97.4096	179.367	198.655	153.136	279.645	216.41	0.000258585	0.0111604
Os07g0538400	149.051	55.9172	41.4173	114.288	37.8424	48.6351	27.1177	35.6105	16.6827	555.573	193.541	390.065	278.859	136.405	329.66	299.149	197.698	280.244	0.000259347	0.0111746
Os11g0264500	692.368	1214.83	1231.92	578.581	1148.17	642.389	993.968	1190.73	1395.78	204.53	1102.25	803.204	215.829	1462.86	1043.75	201.57	1381.84	657.794	0.000260357	0.0111993
Os07g0663800	2244.18	522.991	588.51	1153.59	827.373	980.809	440.141	496.322	298.434	3713.98	2858.62	3556.73	3181.09	2240.48	2750.03	3641.08	2340.62	2457.58	0.000260899	0.0112038
Os05g0106200	109.384	195.162	131.957	116.966	161.69	105.376	51.1065	64.5441	50.9748	116.031	51.749	85.7044	61.1197	77.332	73.0192	39.1743	62.4849	38.9227	0.000263015	0.0112759
Os12g0540700	575.771	202.837	202.27	266.969	161.69	166.17	217.985	185.843	152.924	244.846	157.317	206.57	186.224	147.146	152.481	183.051	131.116	173.595	0.000263505	0.011278
Os05g0525900	414.699	123.895	143.516	242.861	103.207	170.223	248.231	140.217	190.924	724.703	534.05	544.992	995.106	697.062	473.551	1039.9	652.506	873.426	0.000264511	0.0113022
Os05g0401100	7036.67	7611.32	7187.34	4074.17	6729.07	5115.81	5333.85	7908.88	8034.56	3252.81	5431.58	4201.71	2729.38	5316.58	4899.81	4347.64	6345.8	3969.34	0.000266197	0.0113554
Os03g0829200	111.789	53.7244	14.4479	112.502	18.9212	12.1588	20.8598	20.0309	6.48771	61.9489	40.3642	12.0865	27.6949	9.66651	22.5501	17.8065	12.2921	15.5691	0.000271641	0.0115684
Os03g0270000	1109.47	286.165	166.632	283.04	185.772	263.44	162.706	192.519	135.315	1197.68	504.035	638.388	745.852	538.102	757.038	665.252	484.514	462.402	0.000275055	0.0116944
Os09g0499000	235.597	160.077	186.859	234.825	126.428	188.461	137.675	114.621	151.998	359.893	271.165	298.867	325.654	250.255	245.903	440.889	263.256	264.674	0.000275966	0.0117137
Os11g0175700	28.8486	28.5068	57.7915	44.6436	47.303	103.35	123.073	101.267	101.023	100.298	160.422	123.063	114.6	143.924	128.857	147.438	206.917	205.512	0.000278987	0.0118046
Os03g0731025	78.1318	31.7961	23.1166	31.2505	17.2011	7.09262	25.0317	23.3694	16.6827	34.416	20.6996	23.0743	38.1998	25.7773	13.9596	23.5046	20.4868	17.126	0.000279027	0.0118046
Os01g0138800	117.799	93.1954	15.4111	50.0008	33.5421	27.3573	14.6018	45.626	21.3167	133.731	66.2387	19.7779	63.0297	32.2217	27.9191	62.6789	29.7059	10.1199	0.000281927	0.0118858
Os04g0412500	2413.67	1821.15	1360.99	1507.17	1378.67	954.464	968.937	1340.96	1005.59	393.326	520.595	383.472	526.203	763.654	696.904	398.866	531.634	411.024	0.000282334	0.0118858
Os09g0111100	2.40405	10.9642	5.77915	22.3218	18.9212	129.694	26.0747	24.4822	16.6827	5.89989	23.8045	24.173	7.63997	23.6292	30.0667	12.8207	40.9737	26.4674	0.000281777	0.0118858
Os12g0112800	501.245	239.019	232.129	265.183	201.253	205.686	227.372	195.858	175.168	516.241	348.788	524.115	509.013	323.291	471.404	391.743	314.473	312.16	0.000283897	0.0119321
Os03g0313800	1257.32	338.793	226.35	293.755	220.174	147.932	142.889	214.776	195.558	243.862	138.687	108.779	227.289	254.551	194.36	172.367	234.574	159.583	0.000287321	0.0120562
Os02g0755500	81.7378	33.9889	23.1166	74.1083	80.8451	37.4896	46.9345	68.9954	35.219	63.9155	16.5597	19.7779	73.5347	53.7028	27.9191	47.7215	18.4382	11.6768	0.000288861	0.0120892
Os06g0349800	454.366	148.016	104.988	189.289	94.606	99.2967	98.041	89.0264	57.4625	247.795	283.585	245.027	213.919	277.106	167.515	254.989	201.795	189.164	0.000289049	0.0120892
Os04g0414500	52.8892	6.5785	11.5583	30.3576	3.44022	26.344	29.2037	6.67698	11.1218	23.5996	14.4897	15.3828	41.0648	12.8887	15.0334	27.0659	8.19474	10.8984	0.000289639	0.0120942
Os09g0456800	110.586	10.9642	10.5951	13.3931	7.74049	2.02646	11.4729	18.9181	12.0486	56.049	20.6996	23.0743	22.9199	21.4811	18.2548	51.2828	10.2434	16.3475	0.000296223	0.012349
Os01g0795832	316.133	26.314	33.7117	37.5006	16.341	30.397	17.7308	37.8362	12.9754	102.265	43.4692	48.3461	78.3097	73.0358	59.0597	79.7732	50.1928	40.4796	0.000303935	0.01265
Os02g0684400	4571.31	1200.58	1062.4	1271.45	772.329	607.939	469.345	669.923	368.872	1066.9	1490.37	1547.07	1389.52	2314.59	1935.01	1169.53	1836.65	1338.94	0.000305487	0.012694
Os06g0229066	33.6568	10.9642	33.7117	6.2501	1.72011	19.2514	11.4729	17.8053	10.195	57.0323	0	2.19755	0	0	0	0	0	0	0.000307672	0.0127641
Os09g0468300	277.668	128.281	71.2762	124.109	85.1454	50.6616	66.7513	92.3648	42.6335	147.497	106.603	138.446	152.799	83.7764	94.4955	125.358	98.3369	74.7316	0.000309859	0.0128342
Os02g0585200	527.69	75.6527	46.2332	58.0366	91.1658	45.5954	62.5793	61.2056	82.4865	588.023	115.918	187.89	331.384	67.6655	196.508	396.017	119.848	92.6361	0.000315708	0.0130553
Os11g0444700	2699.75	772.974	236.945	783.941	479.911	247.229	214.856	285.997	139.022	1172.11	1545.23	1639.37	1101.11	1541.27	1108.17	1052.72	1423.84	1093.73	0.000319582	0.0131943
Os08g0174100	254.83	382.649	204.197	187.503	204.693	197.58	116.815	242.597	211.314	107.181	20.6996	28.5681	157.574	97.7391	46.1739	9.97165	25.6086	5.44918	0.000320987	0.013231
Os01g0711400	21628.1	28551.8	15897.5	13063.6	18925.5	11824.4	11763.9	15542.9	14796.6	17467.6	16487.2	15414.7	12791.2	22375.8	18525.4	12260.1	19043.6	13457.1	0.000324137	0.0133384
Os02g0251800	37.2628	5.48208	0.963192	7.14297	0.860055	3.0397	5.21494	8.90264	4.63408	90.465	9.31482	17.5804	57.2998	36.5179	18.2548	96.8675	7.1704	10.8984	0.000324629	0.0133384
Os04g0688600	186.314	76.7491	5.77915	23.2147	18.9212	4.05293	8.34391	8.90264	7.41452	393.326	155.247	297.768	139.429	180.441	274.896	212.966	330.863	200.063	0.000325657	0.0133592
Os01g0965900	1394.35	933.05	483.522	940.194	479.911	478.245	309.768	460.711	430.042	1230.13	475.056	644.981	610.242	482.251	658.247	429.493	298.084	400.904	0.000328231	0.0134433
Os07g0162100	1081.82	855.205	557.688	288.397	608.059	353.618	244.059	435.116	340.141	364.81	228.731	185.693	383.908	251.329	366.17	129.631	217.161	127.666	0.000336456	0.0137583
Os12g0434400	38.4649	9.86775	0	22.3218	1.72011	4.05293	8.34391	0	0	81.6152	16.5597	61.5314	46.7948	21.4811	57.9859	12.1084	2.04868	10.1199	0.000338622	0.0138114
Os03g0701100	122.607	43.8567	31.7853	41.965	34.4022	32.4234	30.2467	37.8362	24.0972	35.3994	11.3848	10.9877	26.7399	6.44434	6.44287	20.6556	4.09737	4.67073	0.000338831	0.0138114
Os01g0716500	91.3541	14.2534	6.74234	22.3218	6.88044	8.10586	8.34391	12.2411	6.48771	29.4995	4.13992	1.09877	18.1449	1.07406	6.44287	8.54713	3.07303	4.67073	0.000340157	0.0138435
Os01g0833400	298.103	97.5811	71.2762	109.823	67.9443	74.9792	43.8055	91.252	66.7307	288.111	52.784	70.3216	204.369	73.0358	82.6836	314.819	97.3125	57.6056	0.000341972	0.0138692
Os12g0181600	181.506	57.0137	29.8589	48.2151	43.8628	34.4499	29.2037	57.8671	40.7799	122.914	27.9445	23.0743	63.0297	11.8146	18.2548	132.48	18.4382	19.4614	0.00034241	0.0138692
Os12g0441600	515.67	971.425	810.044	532.151	704.385	579.569	634.137	826.832	829.499	269.428	521.63	452.695	311.329	453.252	394.089	262.112	546.999	254.555	0.000342396	0.0138692
Os12g0555200	435.134	39.471	13.4847	32.1434	12.0408	32.4234	12.5159	10.0155	9.26815	1247.83	308.424	2430.49	275.039	23.6292	1275.69	225.787	129.067	856.3	0.000346266	0.0140033
Os01g0826000	425.518	114.027	88.6137	144.645	60.2038	61.8071	50.0635	91.252	70.4379	41.2992	27.9445	23.0743	34.3799	20.4071	10.7381	9.97165	6.14605	14.7906	0.000350753	0.0141625
Os03g0200200	635.872	168.848	55.8651	225.004	91.1658	50.6616	54.2354	86.8007	65.8039	338.261	155.247	143.939	180.494	135.331	193.286	127.495	102.434	105.87	0.000351799	0.0141824
Os03g0188500	967.632	85.5205	179.154	95.5372	140.189	250.268	351.487	302.69	300.288	356.944	202.856	153.828	494.688	125.665	77.3145	1314.12	172.09	336.292	0.000353023	0.0142094
Os01g0681700	390.659	114.027	100.172	136.609	104.067	72.9527	56.3214	62.3184	48.1944	331.377	298.074	386.769	431.658	539.176	426.304	383.196	483.49	354.197	0.000358161	0.0143541
Os12g0448900	144.243	189.68	218.645	583.938	231.355	273.573	223.2	211.438	244.679	528.04	821.774	851.55	421.153	303.958	359.727	419.522	246.867	348.748	0.000357458	0.0143541
Os12g0559200	964.026	1691.77	1073.96	1098.23	1395.01	1112.53	876.111	1009.34	924.961	1149.5	1336.16	1326.22	1081.06	1415.61	1387.37	826.935	1437.15	1019.78	0.000358293	0.0143541
Os12g0130200	3.60608	4.38567	1.92638	41.0721	3.44022	2.02646	0	2.22566	0	85.5484	37.2593	38.4571	46.7948	17.1849	40.8049	47.0092	8.19474	27.2459	0.000359291	0.0143716
Os02g0702100	168.284	15.3498	11.5583	35.7149	13.7609	4.05293	16.6878	8.90264	12.9754	5.89989	6.20988	0	13.3699	0	4.29525	12.8207	6.14605	4.67073	0.000361323	0.0144304
Os02g0134300	1077.02	438.567	179.154	591.081	251.996	204.673	172.093	229.243	181.656	667.671	213.206	348.312	417.333	412.438	470.33	326.215	234.574	195.392	0.000367686	0.0146617
Os03g0363500	1664.81	2694.99	2492.74	1517.88	2121.75	1704.26	1941	2107.7	2644.2	1488.74	2177.6	1827.26	1421.03	2279.15	1952.19	1673.81	2370.33	1691.58	0.000368611	0.0146759
Os03g0374400	248.82	107.449	98.2456	175.896	112.667	101.323	127.245	93.4777	102.876	293.028	121.093	130.754	152.799	137.479	177.179	231.485	83.9961	99.6421	0.000370175	0.0147153
Os10g0580900	207.951	71.2671	138.7	184.824	132.448	137.8	234.673	279.32	271.557	463.142	261.85	353.805	398.233	170.775	330.734	835.482	224.331	289.585	0.000373526	0.0148256
Os10g0345100	985.662	1370.52	566.357	1301.81	604.618	634.283	461.001	445.132	450.432	1410.07	342.579	484.56	763.042	558.509	588.449	579.068	320.619	289.585	0.000380051	0.0149939
Os03g0132900	681.549	72.3635	89.5768	75.0012	108.367	48.6351	112.643	106.832	75.9988	670.621	203.891	250.521	201.504	49.4066	254.494	308.409	100.386	111.319	0.000380102	0.0149939
Os03g0303100	139.435	297.129	297.626	184.824	343.162	375.909	521.494	511.902	569.064	132.748	398.467	260.41	322.789	266.366	239.46	329.777	474.271	442.94	0.000378759	0.0149939
Os04g0517100	139.435	52.628	57.7915	66.9654	36.1223	89.1644	69.8803	62.3184	100.096	743.386	175.947	394.46	522.383	100.961	223.353	722.232	131.116	122.996	0.000380035	0.0149939
Os08g0203400	12.0203	14.2534	26.0062	8.03584	1.72011	3.0397	28.1607	6.67698	32.4385	1082.63	1318.57	1528.4	846.127	615.434	1733.13	1387.48	1647.14	1475.95	0.000382137	0.0150511
Os05g0127300	189.92	101.967	191.675	249.111	178.891	241.149	265.962	267.079	288.239	631.289	322.914	388.966	549.123	262.07	267.379	725.081	244.818	370.544	0.000385005	0.0151408
Os11g0658900	0	0	0	27.679	3.44022	2.02646	5.21494	8.90264	0	17.6997	10.3498	2.19755	9.54996	0	0	0	0	0	0.000388032	0.0152365
Os07g0519600	225.981	315.768	106.914	225.896	202.113	146.919	104.299	81.2365	55.6089	211.413	159.387	206.57	152.799	129.961	176.105	84.759	125.994	104.313	0.000390182	0.0152975
Os11g0602750	94.9601	168.848	34.6749	88.3943	87.7256	39.516	35.4616	40.0619	40.7799	152.414	53.819	46.1485	102.185	57.999	45.1001	42.7356	43.0224	23.3536	0.000391546	0.0153276
Os01g0727700	324.547	20.8319	21.1902	51.7865	9.4606	22.2911	5.21494	26.7079	9.26815	57.0323	62.0988	38.4571	25.7849	17.1849	27.9191	20.6556	13.3165	7.00609	0.00039643	0.0154716
Os09g0442600	1503.74	2904.41	1997.66	1565.2	1953.18	1492.49	845.864	790.109	829.499	4038.48	2527.42	2132.72	2347.38	3336.02	1943.6	3550.62	2484.03	1598.17	0.000396289	0.0154716
Os10g0466800	420.709	158.98	176.264	121.431	111.807	123.614	95.955	125.75	92.6815	104.231	72.4486	41.7534	112.69	64.4434	53.6906	79.7732	67.6066	21.7967	0.000401431	0.015643
Os03g0390200	1084.23	998.835	492.191	725.012	573.656	470.14	385.906	445.132	389.262	781.736	525.77	572.462	498.508	704.581	593.818	475.79	530.609	399.347	0.000409373	0.0159283
Os07g0116900	111.789	37.2782	11.5583	38.3935	28.3818	23.3043	10.4299	20.0309	6.48771	77.6819	14.4897	28.5681	45.8398	36.5179	17.181	34.1885	12.2921	17.126	0.000427556	0.0166106
Os11g0629500	429.124	558.076	683.866	488.401	552.155	592.741	712.361	725.565	700.672	451.342	583.729	651.573	556.763	966.651	787.104	514.964	704.748	646.117	0.000432339	0.0167711
Os02g0712500	390.659	75.6527	89.5768	80.3584	76.5449	99.2967	93.869	94.5905	87.1206	141.597	61.0638	73.6179	111.735	34.3698	53.6906	143.164	41.998	88.7438	0.000433872	0.0168052
Os04g0531900	1524.17	715.96	260.062	660.725	346.602	195.554	186.695	348.316	202.046	788.619	395.363	396.658	375.313	220.182	460.666	264.961	212.039	235.872	0.00043564	0.0168482
Os02g0139100	496.437	173.234	209.013	191.074	135.029	194.541	210.684	214.776	251.167	458.225	240.115	346.114	359.079	187.96	254.494	415.96	282.719	312.939	0.000436442	0.0168539
Os01g0647200	30989.5	71119.1	33771.4	11701.1	37529.3	20353.8	4393.07	9791.79	4693.39	30887.9	18043.8	10615.3	8892.92	19618.7	9445.25	75.4996	12898.5	2505.84	0.000439616	0.016951
Os03g0156700	550.528	599.74	603.921	463.4	607.199	610.979	293.08	349.428	308.629	564.423	471.951	445.004	431.658	500.51	441.337	336.899	554.169	283.357	0.000440363	0.0169543
Os09g0519200	6989.79	2082.09	1354.25	766.084	1427.69	1087.2	779.113	1200.74	901.791	708.97	1002.9	653.771	690.462	1009.61	629.254	490.035	983.369	557.373	0.000441307	0.0169652
Os05g0151200	120.203	2.19283	1.92638	47.3222	0	2.02646	0	0	0	3.93326	0	0	1.90999	0	0	0	0	0	0.000443412	0.0170206
Os07g0217600	582.983	368.396	242.724	506.258	285.538	176.302	243.016	277.095	283.605	822.052	924.238	1262.49	395.368	177.219	516.504	316.244	204.868	401.682	0.000445555	0.0170392
Os09g0426000	656.307	129.377	87.6505	185.717	103.207	73.9659	101.17	123.524	62.0966	167.164	74.5186	71.4203	62.0747	82.7023	73.0192	59.8299	60.4362	50.5995	0.000445886	0.0170392
Os09g0510200	344.982	168.848	144.479	162.503	104.927	109.429	118.901	120.186	86.1938	126.848	86.9384	92.2971	124.149	79.4802	96.6431	79.7732	102.434	77.067	0.000445041	0.0170392
Os04g0618700	40.8689	3.28925	1.92638	11.6073	3.44022	12.1588	2.08598	1.11283	6.48771	58.0156	4.13992	16.4816	28.6499	8.59245	19.3286	38.4621	7.1704	14.7906	0.000448105	0.0170986
Os07g0171100	7500.65	10176.9	9793.74	6234.03	8726.11	7291.22	7493.88	9907.52	9719.51	4759.25	5989.43	5108.2	3937.45	6682.78	6269.99	5189.53	7735.83	4775.82	0.000451607	0.0172066
Os02g0471500	762.085	610.704	500.86	808.049	655.362	824.771	707.147	579.784	542.187	1152.45	1057.75	858.143	1268.23	949.466	885.895	1068.39	745.721	760.55	0.000461041	0.0175334
Os04g0631100	757.277	645.789	332.301	338.398	378.424	268.506	230.501	327.172	284.532	337.277	238.045	153.828	233.974	197.626	196.508	163.82	259.159	111.319	0.000462231	0.0175334
Os08g0545700	603.418	1024.05	1058.55	633.939	866.935	506.616	666.47	980.403	916.62	465.108	772.095	479.066	405.873	740.025	685.092	443.738	775.427	576.056	0.0004619	0.0175334
Os04g0589800	239.203	13.157	3.85277	214.289	8.60055	5.06616	8.34391	26.7079	5.56089	49.1658	16.5597	6.59265	11.46	6.44434	6.44287	19.9433	18.4382	10.8984	0.000464488	0.017593
Os02g0525501	69.7176	15.3498	7.70554	19.6432	16.341	15.1985	8.34391	4.45132	5.56089	25.5662	11.3848	8.7902	18.1449	11.8146	12.8857	6.41035	4.09737	7.00609	0.000467919	0.0176539
Os05g0582500	86.5459	39.471	13.4847	114.288	19.7813	20.2646	12.5159	34.4977	0	95.3816	8.27984	7.69142	17.1899	8.59245	6.44287	12.8207	17.4138	5.44918	0.000468158	0.0176539
Os08g0189600	12.0203	13.157	1.92638	3.57149	2.58016	2.02646	0	4.45132	0	30.4828	151.107	49.4449	22.9199	17.1849	32.2144	12.8207	17.4138	3.11382	0.000466807	0.0176539
Os03g0288700	432.73	355.239	370.829	319.648	287.258	278.639	381.734	290.448	312.337	397.259	328.089	306.558	383.908	285.699	331.808	391.743	324.717	308.268	0.000470179	0.0177041
Os03g0723400	595.003	123.895	53.9387	436.614	17.2011	85.1115	10.4299	24.4822	24.0972	196.663	0	0	1.90999	0	2.14762	0	0	0	0.000473227	0.0177928
Os06g0248500	109.384	54.8208	34.6749	75.8941	56.7636	36.4764	70.9233	87.9135	72.2916	248.779	40.3642	57.1363	184.314	68.7396	81.6097	346.871	133.165	52.9349	0.000474449	0.0178126
Os05g0500200	252.426	274.104	99.2088	288.397	113.527	158.064	85.5251	71.2211	56.5357	53.099	36.2243	50.5436	19.0999	51.5547	21.4762	25.6414	12.2921	14.0122	0.000478484	0.0179379
Os11g0474800	20.4345	8.77133	3.85277	3.57149	0	2.02646	4.17196	1.11283	5.56089	203.546	103.498	276.891	95.4996	28.9995	274.896	37.7498	44.0467	119.882	0.000481296	0.0179407
Os02g0221100	8.41419	1.09642	5.77915	14.2859	18.9212	25.3308	9.3869	2.22566	14.829	53.099	28.9795	74.7167	36.2899	23.6292	48.3216	47.7215	20.4868	30.3597	0.000481014	0.0179407
Os06g0637400	21.6365	15.3498	3.85277	10.7145	1.72011	0	2.08598	0	1.85363	35.3994	14.4897	20.8767	14.3249	0	5.36906	8.54713	2.04868	6.22763	0.000481353	0.0179407
Os08g0155100	290.891	313.575	372.755	337.505	378.424	391.108	443.27	406.183	459.7	398.243	519.56	541.696	371.493	383.438	438.115	420.946	468.125	534.02	0.000479329	0.0179407
Os12g0283100	24.0405	28.5068	7.70554	23.2147	8.60055	16.2117	6.25793	0	3.70726	132.748	20.6996	24.173	39.1548	17.1849	34.362	18.5188	12.2921	21.7967	0.000482672	0.0179638
Os03g0684400	7834.81	8521.35	5676.09	5680.45	6820.23	4615.27	4526.57	5598.64	5442.26	3170.21	2891.74	2238.2	2841.11	3432.68	2627.62	2445.9	3283.02	2124.4	0.000485632	0.0180217
Os04g0586200	677.943	89.9061	73.2026	78.5727	47.303	73.9659	94.912	102.38	113.071	91.4483	77.6235	65.9265	133.699	92.3688	83.7574	167.381	61.4605	115.99	0.00048495	0.0180217
Os02g0814000	2881.26	1020.76	886.137	1033.05	761.148	818.691	804.145	1093.91	879.547	1606.74	867.314	976.811	1384.74	613.286	982.538	1786.35	813.328	755.101	0.000489477	0.0181382
Os01g0855600	33.6568	9.86775	4.81596	11.6073	6.88044	2.02646	2.08598	1.11283	1.85363	13.7664	15.5247	14.2841	20.0549	13.9627	9.66431	34.9008	7.1704	8.563	0.000492554	0.0182259
Os07g0252800	2024.21	198.451	207.086	172.324	159.11	147.932	95.955	201.422	149.217	98.3315	151.107	74.7167	114.6	128.887	60.1335	105.415	140.335	88.7438	0.000499615	0.0184606
Os12g0236225	3636.13	17972.5	6483.24	1444.67	9872.57	3707.42	313.94	350.541	290.093	9768.26	4651.2	3034.82	2124.87	5210.25	2726.41	4.27356	2767.77	300.483	0.000501323	0.0184971
Os01g0644000	1918.44	708.285	157.963	974.123	261.457	223.924	202.34	330.51	199.265	1246.84	393.293	557.079	763.997	524.139	688.314	314.819	329.838	328.508	0.000507397	0.0186676
Os03g0785100	9964.8	575.619	519.16	513.401	509.152	721.421	612.235	771.191	479.163	712.904	616.848	625.203	758.267	668.063	566.973	713.685	637.141	571.385	0.000507272	0.0186676
Os11g0559200	54.0912	134.859	133.884	92.8586	96.3261	102.336	117.858	115.734	157.559	234.029	271.165	381.275	157.574	196.552	225.501	158.834	209.99	230.422	0.000508599	0.018685
Os11g0202300	544.518	732.406	633.78	476.793	611.499	440.756	426.582	582.01	490.285	774.853	994.616	944.946	590.188	858.171	796.769	784.911	969.028	649.231	0.000512934	0.0188173
Os11g0147150	64.9095	567.944	32.7485	548.223	16.341	22.2911	22.9458	18.9181	24.0972	371.693	166.632	41.7534	74.4897	25.7773	47.2477	81.91	10.2434	17.126	0.000513928	0.0188269
Os01g0846300	603.418	480.23	549.019	596.438	473.03	369.83	272.22	448.47	344.775	80.6319	139.722	58.2351	148.024	171.849	175.031	81.91	83.9961	46.7073	0.000516362	0.0188891
Os01g0607800	183.91	377.167	365.05	158.038	341.442	172.249	163.749	224.792	200.192	166.18	223.556	198.878	135.609	248.107	199.729	153.848	199.747	120.66	0.000520394	0.0189825
Os05g0143700	0	4.38567	3.85277	12.5002	8.60055	12.1588	0	0	0	11.7998	9.31482	4.3951	7.63997	6.44434	6.44287	12.1084	8.19474	7.78454	0.00051985	0.0189825
Os01g0257300	26.4446	2.19283	0	7.14297	8.60055	6.07939	2.08598	0	0	15.733	13.4547	2.19755	0.954996	2.14811	0	1.42452	0	0	0.000522602	0.0190361
Os02g0782600	770.499	853.012	657.86	761.619	785.23	586.661	570.515	757.837	635.795	597.856	480.231	436.213	475.588	582.138	499.323	329.064	386.177	314.496	0.000532099	0.0193545
Os06g0356800	52.8892	39.471	15.4111	54.4652	5.16033	18.2382	2.08598	4.45132	12.9754	96.3649	18.6296	10.9877	32.4699	6.44434	10.7381	50.5705	6.14605	7.00609	0.000535693	0.0194577
Os07g0613800	808.964	122.799	80.9081	150.002	68.8044	42.5557	38.5906	71.2211	41.7067	57.0323	64.1688	25.2718	63.9847	46.1844	69.7978	27.7782	59.4119	44.3719	0.000540351	0.0195992
Os02g0639800	2199.71	1092.03	827.382	1139.3	752.548	896.71	749.909	788.996	739.598	1231.11	928.377	1009.77	1127.85	990.28	864.419	1059.13	890.154	783.903	0.000546331	0.0197881
Os01g0862800	115.395	96.4846	46.2332	52.6794	43.8628	39.516	46.9345	16.6924	41.7067	766.986	4.13992	7.69142	231.109	20.4071	11.8119	806.991	9.21908	12.4553	0.000547224	0.0197925
Os06g0623600	430.326	581.101	323.632	625.903	369.824	282.692	246.145	258.176	209.46	605.722	405.712	481.263	477.498	570.324	478.92	371.8	390.274	298.926	0.000548521	0.0198116
Os03g0340500	347.386	160.077	109.804	220.539	122.988	103.35	89.6971	72.3339	86.1938	351.044	227.696	238.434	196.729	234.144	239.46	213.678	166.968	210.183	0.000552046	0.0199109
Os03g0561400	4.80811	169.945	11.5583	215.182	1.72011	8.10586	0	2.22566	5.56089	90.465	12.4198	2.19755	12.4149	0	0	1.42452	0	0	0.000560998	0.0202054
Os06g0166400	558.943	237.922	188.786	636.617	172.011	194.541	132.46	149.119	92.6815	586.056	302.214	441.707	597.828	607.916	583.08	411.687	510.123	393.898	0.000563818	0.0202785
Os01g0613500	222.375	78.942	13.4847	33.0362	16.341	13.172	4.17196	25.5951	5.56089	205.513	68.3087	213.162	190.044	270.662	332.882	59.1176	112.678	65.3902	0.000564757	0.0202839
Os03g0126700	2428.09	1334.34	536.498	690.19	848.014	693.051	397.379	760.062	495.846	438.559	253.57	231.841	403.008	328.661	255.567	221.513	242.769	165.811	0.000565678	0.0202886
Os04g0475600	1117.89	925.375	476.78	757.155	450.669	581.595	389.035	498.548	376.287	720.77	361.208	368.089	664.677	619.73	341.472	306.984	331.887	320.723	0.000567207	0.020315
Os04g0436000	33.6568	41.6638	131.957	59.8224	122.988	177.316	184.609	247.048	198.338	22.6163	85.9034	57.1363	92.6346	85.9245	61.2073	83.3345	130.091	153.355	0.000571664	0.0204177
Os04g0685300	561.347	316.864	643.412	575.009	402.506	374.896	626.836	456.26	665.453	2216.39	666.527	683.438	1843.14	545.621	529.39	2582.66	543.926	639.889	0.000571112	0.0204177
Os03g0136900	2398.04	2038.24	2148.88	2764.33	1977.27	2559.42	2688.83	2215.64	2658.11	3074.83	2139.3	2578.82	3070.31	2306	2324.8	2728.67	2310.92	2552.55	0.000573767	0.0204529
Os08g0411800	254.83	139.245	123.289	179.467	145.349	105.376	105.342	101.267	105.657	194.696	130.408	142.841	199.594	175.071	139.596	171.655	140.335	127.666	0.000574244	0.0204529
Os09g0467200	6749.38	2378.13	1278.16	3219.69	2273.98	1467.16	1170.23	1800.56	965.741	5863.51	2330.78	3130.41	3242.21	1840.93	3228.95	1923.1	2206.43	1363.07	0.000576269	0.0204967
Os02g0577100	570.963	364.01	584.657	731.262	487.651	664.68	770.769	756.724	844.329	535.907	517.49	584.548	570.133	524.139	580.933	740.751	558.267	593.961	0.000579754	0.0205921
Os03g0702900	25.2426	4.38567	11.5583	25.0004	14.6209	14.1852	5.21494	2.22566	6.48771	14.7497	4.13992	6.59265	8.59496	4.29622	6.44287	3.5613	0	3.11382	0.000582104	0.020647
Os01g0113200	14.4243	17.5427	23.1166	19.6432	14.6209	20.2646	12.5159	4.45132	3.70726	165.197	54.854	43.951	85.9496	30.0736	21.4762	123.933	45.0711	26.4674	0.000583928	0.020651
Os02g0738200	28.8486	0	0	7.14297	0	2.02646	4.17196	0	3.70726	149.464	30.0144	93.3958	29.6049	12.8887	60.1335	69.8015	19.4625	24.9105	0.000583723	0.020651
Os08g0104600	20977.8	24599.2	35503.3	20678	26410.6	20481.5	32278.4	42697	45569.6	12456.6	23740.4	24037.9	13756.7	19414.6	26872.2	25008.2	26801.9	21762.5	0.00058463	0.020651
Os04g0587400	2844	266.429	223.461	458.936	343.162	205.686	207.555	223.679	113.071	809.269	530.945	825.18	626.477	634.767	795.695	612.544	604.362	571.385	0.000585613	0.0206574
Os01g0121600	491.629	128.281	128.105	150.895	158.25	107.403	103.256	148.006	76.9256	268.445	122.128	87.902	212.964	89.1467	150.334	200.858	115.751	70.8393	0.000589111	0.0207522
Os05g0551100	171.89	1192.9	299.553	98.2159	527.214	300.93	123.073	178.053	173.314	328.427	342.579	192.286	227.289	398.475	95.5693	181.626	247.891	194.614	0.000592681	0.0208494
Os02g0822900	7.21216	5.48208	3.85277	41.0721	10.3207	14.1852	4.17196	3.33849	3.70726	207.48	47.6091	178.001	104.095	132.109	158.924	164.532	155.7	158.805	0.000597021	0.0209733
Os10g0101100	139.435	76.7491	38.5277	37.5006	26.6617	24.3176	20.8598	33.3849	13.9022	63.9155	57.9589	49.4449	35.3349	61.2212	59.0597	31.3395	51.2171	39.7012	0.000599993	0.0210489
Os12g0512400	66.1115	35.0853	19.2638	23.2147	25.8016	17.2249	12.5159	7.78981	12.9754	57.0323	43.4692	57.1363	54.4348	46.1844	47.2477	45.5847	26.6329	14.0122	0.000603115	0.0211296
Os03g0802500	442.346	161.173	68.3866	100.002	58.4837	104.363	71.9662	94.5905	64.8771	274.345	150.072	246.125	244.479	105.258	185.77	126.782	97.3125	115.211	0.000608293	0.021282
Os03g0560050	0	8.77133	11.5583	0	5.16033	10.1323	13.5589	28.9336	16.6827	31.4661	58.9939	34.062	22.9199	33.2957	36.5096	11.3962	33.8033	20.2398	0.000632094	0.0220846
Os03g0661600	324.547	37.2782	3.85277	48.2151	33.5421	22.2911	27.1177	13.354	9.26815	280.245	321.879	423.028	150.889	56.925	133.153	82.6222	124.97	80.1808	0.000634846	0.0221506
Os08g0120500	1800.64	800.384	692.535	945.551	795.551	806.533	756.167	746.709	544.04	1564.45	1100.18	1272.38	1602.48	1258.79	850.459	1604.01	987.466	1089.84	0.000638189	0.022237
Os10g0109600	112.991	39.471	0	38.3935	5.16033	10.1323	6.25793	4.45132	0	275.328	48.6441	175.804	126.059	139.627	121.341	183.051	36.8763	46.7073	0.000639637	0.0222573
Os11g0157400	229.587	141.438	249.467	237.504	275.217	301.943	407.809	312.705	370.726	362.843	426.412	341.719	360.034	263.144	231.943	537.757	400.518	526.235	0.000640811	0.022268
Os01g0850100	360.608	506.544	332.301	456.257	270.917	312.075	226.329	193.632	198.338	639.155	292.899	356.003	424.973	297.514	362.949	396.729	284.767	285.693	0.000642402	0.0222729
Os06g0295000	0	111.834	26.9694	5.35723	22.3614	0	0	0	0	3.93326	6.20988	4.3951	1.90999	16.1108	0	0	0	0	0.000642686	0.0222729
Os01g0559750	2331.93	1249.91	2417.61	1681.28	1731.29	2449.99	2827.54	3299.54	3126.15	1259.63	1497.62	1365.78	2135.37	1745.34	2129.37	3531.39	2837.43	2096.38	0.000648388	0.0223882
Os03g0693900	3.60608	1.09642	0	28.5719	0	1.01323	0	1.11283	0	34.416	8.27984	0	1.90999	0	0	1.42452	0	0	0.000647943	0.0223882
Os07g0130100	70.9196	19.7355	26.9694	33.9291	15.481	16.2117	11.4729	4.45132	7.41452	69.8154	22.7696	87.902	21.9649	33.2957	68.724	38.4621	26.6329	32.6951	0.000648631	0.0223882
Os03g0114900	197.132	72.3635	44.3068	56.2509	52.4633	62.8204	57.3644	45.626	50.048	122.914	37.2593	68.124	86.9046	51.5547	46.1739	133.905	59.4119	61.4979	0.000652122	0.0224785
Os01g0314800	21452.6	5734.26	4268.87	3983.1	4450.78	3509.84	3929.98	7098.74	4234.62	2968.63	658.248	1017.47	2158.29	709.951	1182.27	3320.56	605.386	428.15	0.000657404	0.0225948
Os01g0687400	341.376	57.0137	78.9817	34.822	52.4633	54.7145	47.9775	51.1902	48.1944	869.251	543.365	826.278	456.488	273.884	628.18	576.931	480.417	492.762	0.000658134	0.0225948
Os06g0705100	3840.48	4422.94	5361.13	3035.76	4393.16	3758.08	3956.06	5410.58	5134.56	2536.95	4310.69	3678.7	2513.55	3964.34	4008.54	3572.7	4511.2	3288.19	0.000656752	0.0225948
Os01g0949800	197.132	0	2.88958	35.7149	43.0027	6.07939	33.3756	40.0619	25.9508	55.0657	0	4.3951	34.3799	2.14811	0	0	0	0	0.00066081	0.0226261
Os08g0163400	1885.98	3351.74	4027.11	3900.96	3459.14	3172.43	4587.07	5488.47	6664.73	1962.7	2210.72	2774.41	2275.76	2759.25	3874.32	3010.01	3298.38	2832.8	0.000660031	0.0226261
Os01g0106400	1010.9	1059.14	2878.02	489.294	1220.42	1555.31	2265.37	3051.38	2218.8	895.8	1236.8	1570.15	900.561	933.355	1768.57	995.028	2305.79	1349.84	0.000662991	0.0226491
Os02g0568600	169.486	15.3498	7.70554	19.6432	10.3207	12.1588	20.8598	17.8053	9.26815	85.5484	20.6996	29.6669	13.3699	11.8146	26.8453	46.2969	9.21908	31.1382	0.000663244	0.0226491
Os03g0808300	3624.11	453.916	394.909	549.116	381.864	364.764	293.08	447.357	303.995	316.628	290.829	290.076	341.889	364.105	314.627	362.541	319.595	242.099	0.000664366	0.0226573
Os05g0495250	363.012	134.859	94.3928	86.6085	95.4661	80.0453	82.3961	115.734	93.6083	202.563	47.6091	63.7289	191.954	65.5174	81.6097	313.395	44.0467	52.1564	0.000667249	0.0227254
Os04g0630700	155.061	8.77133	40.4541	28.5719	15.481	29.3837	38.5906	20.0309	18.5363	77.6819	47.6091	46.1485	61.1197	25.7773	66.5764	86.8958	32.779	44.3719	0.00066943	0.0227695
Os01g0667600	224.779	18.6391	30.8221	34.822	29.2419	24.3176	30.2467	40.0619	22.2436	117.015	38.2943	63.7289	91.6796	49.4066	81.6097	200.145	56.3388	55.2703	0.000672342	0.0228383
Os03g0159900	4913.89	1797.03	1491.98	2186.64	1493.05	1448.92	1168.15	1440	1243.79	2914.55	1808.11	2074.49	2550.79	2381.18	2223.87	2636.08	2115.27	1733.62	0.000680758	0.0230694
Os04g0486950	1269.34	446.241	67.4234	1121.45	159.97	139.826	83.4391	63.4313	83.4134	2045.3	805.215	2029.44	1847.92	3490.68	2088.57	1730.79	643.287	1560.8	0.000680943	0.0230694
Os07g0162600	1138.32	252.176	271.62	399.114	279.518	157.051	195.039	183.617	169.607	1109.18	506.105	884.514	599.738	576.768	806.433	907.42	680.163	556.595	0.000685215	0.0231836
Os03g0724700	137.031	32.8925	26.9694	73.2155	36.9824	45.5954	22.9458	20.0309	25.9508	71.782	20.6996	20.8767	58.2548	19.333	60.1335	54.8441	32.779	38.1443	0.000687859	0.0232424
Os11g0241700	100.97	120.606	240.798	44.6436	132.448	26.344	175.222	244.822	286.386	35.3994	140.757	149.433	65.8947	94.5169	170.736	177.353	296.035	158.026	0.000690424	0.0232984
Os11g0151500	26.4446	123.895	26.9694	32.1434	43.8628	26.344	17.7308	6.67698	5.56089	59.9822	2.06996	0	21.0099	4.29622	2.14762	1.42452	2.04868	0	0.00069472	0.0233819
Os05g0560900	61.3034	4.38567	0.963192	1.78574	0	2.02646	1.04299	0	1.85363	13.7664	7.24486	13.1853	11.46	11.8146	10.7381	13.533	11.2678	20.2398	0.00069396	0.0233819
Os09g0356800	0	32.8925	25.043	8.92871	13.7609	4.05293	45.8915	35.6105	98.2424	357.927	615.813	588.943	294.139	233.07	511.135	576.219	518.317	585.398	0.0006957	0.0233843
Os12g0134900	21.6365	8.77133	19.2638	42.8578	32.6821	20.2646	8.34391	8.90264	4.63408	23.5996	10.3498	4.3951	22.9199	17.1849	4.29525	9.25939	9.21908	3.11382	0.000698464	0.0234465
Os03g0382100	322.143	673.2	1112.49	512.508	474.75	1074.03	1465.4	1465.6	1089.01	1775.87	2413.57	3609.47	1683.66	1226.57	2523.46	1686.63	2444.08	2546.32	0.000700357	0.0234793
Os01g0949750	233.193	46.0495	26.9694	80.3584	41.2826	24.3176	34.4186	64.5441	22.2436	112.098	56.9239	50.5436	59.2098	45.1104	57.9859	32.0517	26.6329	20.2398	0.000706456	0.0235914
Os04g0269600	7136.43	11502.5	6101.82	8512.64	7006.01	6164.5	4501.54	4818.55	4872.27	6827.16	4433.86	4942.29	6054.68	7607.54	6282.88	3717.29	5077.67	3361.37	0.00070593	0.0235914
Os04g0600300	87.748	71.2671	7.70554	46.4293	33.5421	42.5557	35.4616	40.0619	36.1458	232.062	53.819	97.7909	70.6697	15.0368	4.29525	37.7498	0	6.22763	0.000705675	0.0235914
Os11g0267000	1602.3	4857.12	6112.42	4273.28	5708.18	3477.41	5052.24	6922.91	7994.71	1630.34	4074.72	3766.6	1848.87	3396.17	5025.44	1824.81	4152.68	2741.72	0.000716639	0.0239004
Os10g0166600	671.933	1195.09	518.197	922.336	1050.99	642.389	554.87	381.7	531.992	636.205	981.161	672.45	627.432	1170.72	717.307	417.385	798.987	482.642	0.000720298	0.0239913
Os03g0406900	38.4649	38.3746	19.2638	25.0004	16.341	6.07939	21.9028	7.78981	0	15.733	2.06996	6.59265	17.1899	16.1108	4.29525	7.12261	1.02434	1.55691	0.000733856	0.0244112
Os04g0635500	669.529	87.7133	75.129	131.252	55.0435	77.0056	85.5251	92.3648	44.4871	247.795	180.087	240.632	319.924	288.921	226.574	270.659	264.28	238.207	0.000745947	0.0247813
Os03g0264150	254.83	33.9889	51.0492	39.2863	34.4022	46.6087	41.7196	44.5132	33.3653	109.148	38.2943	51.6424	69.7147	57.999	57.9859	118.235	32.779	49.0426	0.000747709	0.0248077
Os03g0624300	3164.94	230.247	234.056	382.149	258.876	221.898	267.005	242.597	238.191	312.694	318.774	416.436	312.284	259.922	278.117	259.975	204.868	237.429	0.000749861	0.024847
Os08g0458200	134.627	293.84	207.086	233.932	144.489	99.2967	122.03	151.345	133.461	155.364	115.918	57.1363	66.8497	38.666	36.5096	55.5563	19.4625	28.0244	0.000752102	0.0248891
Os04g0320700	16527.9	13101.1	4599.24	6683.14	6329.14	4606.15	3325.05	4568.16	3515.41	9394.6	9299.3	8223.23	5840.76	11163.7	9382.97	5896.81	13849.1	7308.91	0.000756036	0.0249872
Os04g0405300	635.872	148.016	38.5277	205.36	72.2446	98.2835	36.5046	73.4467	35.219	567.373	348.788	560.375	358.124	168.627	417.713	343.31	159.797	214.075	0.000757716	0.0250105
Os01g0286100	747.661	427.602	347.712	555.366	375.844	370.843	318.112	372.798	328.093	523.124	366.383	361.497	396.323	320.069	345.768	474.366	234.574	238.207	0.000761544	0.0250724
Os05g0475400	253.628	73.4599	40.4541	110.716	51.6033	33.4367	38.5906	51.1902	40.7799	54.0824	47.6091	20.8767	54.4348	35.4439	15.0334	28.4904	19.4625	28.0244	0.000761505	0.0250724
Os01g0385400	64.9095	96.4846	23.1166	194.646	39.5625	53.7013	14.6018	4.45132	24.0972	121.931	8.27984	10.9877	28.6499	12.8887	17.181	22.7923	16.3895	9.34145	0.000765367	0.025166
Os03g0176700	1068.6	1309.12	952.597	733.047	1001.96	752.831	654.997	910.294	861.011	746.336	767.955	792.216	575.863	849.578	820.393	586.191	745.721	638.332	0.0007669	0.0251841
Os06g0608700	13926.7	22264.9	14753.2	12377.9	16054.6	9662.18	11487.5	13514.2	14085.7	6969.74	11068.1	8349.59	5740.48	10094	9726.59	6776.45	12525.7	7579.81	0.0007762	0.025457
Os02g0589400	1265.73	1616.12	3341.31	1238.41	1963.5	2124.75	2894.29	3360.74	3123.37	1285.19	2739.59	2510.7	1611.08	1678.75	2510.57	1692.33	2767.77	2081.59	0.000779963	0.0255478
Os04g0669600	135.829	112.931	55.8651	143.752	48.1631	62.8204	34.4186	36.7234	24.0972	105.215	34.1544	86.8032	66.8497	73.0358	62.2811	61.9667	45.0711	42.0365	0.000788421	0.0257919
Os01g0692100	46.8791	10.9642	2.88958	16.0717	0	7.09262	2.08598	2.22566	1.85363	30.4828	9.31482	9.88897	24.8299	17.1849	11.8119	5.69809	6.14605	4.67073	0.000791268	0.025841
Os01g0839100	91.3541	46.0495	9.63192	66.9654	12.0408	18.2382	16.6878	17.8053	11.1218	47.1991	105.568	21.9755	36.2899	12.8887	19.3286	5.69809	8.19474	10.8984	0.000791934	0.025841
Os04g0399300	206.749	130.474	5.77915	101.787	56.7636	26.344	37.5476	13.354	11.1218	149.464	56.9239	46.1485	61.1197	46.1844	68.724	48.4337	56.3388	30.3597	0.00079344	0.0258573
Os12g0601400	91.3541	178.716	332.301	250.897	372.404	386.041	402.594	553.076	421.701	227.146	507.14	548.289	436.433	582.138	440.263	459.408	605.386	485.755	0.000795169	0.0258808
Os02g0705100	4864.6	5209.07	4238.04	3038.44	3841	2787.4	3330.26	4220.96	3925.99	2452.39	2423.92	2533.77	2224.19	3635.68	3018.49	2163.14	3196.97	2178.89	0.000796345	0.0258863
Os08g0127100	765.691	642.5	314.001	1056.27	364.663	261.414	298.295	307.141	241.899	3986.36	1155.04	2043.72	1155.55	476.881	1727.76	1672.39	759.038	800.251	0.00080222	0.0260443
Os07g0621600	109.384	21.9283	10.5951	33.0362	14.6209	3.0397	13.5589	6.67698	7.41452	42.2826	13.4547	28.5681	24.8299	13.9627	33.2882	14.2452	9.21908	13.2337	0.000803505	0.026053
Os07g0528900	20.4345	2.19283	0	46.4293	7.74049	0	5.21494	4.45132	0	12.7831	0	0	8.59496	0	0	0	0	0	0.000806052	0.0261027
Os03g0181100	735.641	180.909	184.933	74.1083	77.4049	186.435	111.6	166.924	291.02	1534.96	151.107	206.57	919.661	127.813	183.622	1890.34	100.386	84.8515	0.000819899	0.0265176
Os06g0112100	164.678	275.201	392.019	234.825	239.095	298.903	311.854	281.546	394.823	332.361	454.356	684.537	353.349	360.883	584.154	401.003	396.421	463.18	0.000827232	0.0267212
Os02g0193000	687.559	148.016	139.663	225.896	142.769	175.289	148.104	191.407	164.046	657.838	188.366	359.299	427.838	157.886	330.734	538.469	245.842	246.77	0.000829101	0.0267479
Os01g0869400	8.41419	15.3498	4.81596	19.6432	7.74049	7.09262	1.04299	2.22566	0	7.86652	0	0	15.2799	15.0368	1.07381	1.42452	0	0.778454	0.000832734	0.0268051
Os05g0193700	176.698	58.1101	32.7485	64.2867	43.0027	52.6881	25.0317	13.354	24.0972	92.4317	48.6441	13.1853	53.4798	79.4802	34.362	42.0234	36.8763	24.9105	0.000832963	0.0268051
Os01g0752500	1760.97	405.674	162.779	511.615	249.416	309.036	211.727	254.838	139.022	449.375	211.136	280.188	489.913	549.917	606.704	284.192	278.621	303.597	0.000836358	0.0268807
Os03g0748300	1252.51	1594.19	1663.43	1180.38	1194.62	1299.98	998.14	1342.07	1280.86	1048.21	1221.28	1166.9	1057.18	1528.38	1274.62	996.453	1395.15	1114.75	0.000840252	0.0269384
Os07g0407700	221.173	253.272	405.504	416.078	381.864	396.174	656.04	460.711	620.966	554.59	416.062	515.325	553.898	292.143	416.639	1207.28	426.126	524.678	0.000840022	0.0269384
Os02g0521100	159.87	31.7961	4.81596	41.0721	9.4606	6.07939	4.17196	5.56415	7.41452	24.5829	14.4897	7.69142	14.3249	19.333	22.5501	12.8207	14.3408	4.67073	0.000844908	0.0270539
Os05g0575000	361.81	82.2312	13.4847	354.47	25.8016	38.5028	23.9887	44.5132	31.5117	204.53	211.136	153.828	58.2548	26.8514	69.7978	53.4196	32.779	41.2581	0.000848245	0.0271269
Os11g0640000	0	0	1.92638	3.57149	5.16033	14.1852	25.0317	8.90264	16.6827	5.89989	6.20988	8.7902	5.72998	0	2.14762	6.41035	4.09737	6.22763	0.000855928	0.0273386
Os05g0299101	12.0203	8.77133	5.77915	17.8574	5.16033	10.1323	4.17196	4.45132	2.78045	9.83315	3.10494	8.7902	2.86499	1.07406	0	0.712261	0	0	0.000861655	0.0274873
Os06g0697600	656.307	183.102	99.2088	229.468	135.889	140.839	70.9233	122.411	88.0474	240.912	70.3787	103.285	162.349	84.8504	133.153	79.7732	91.1665	28.0244	0.000864423	0.0275414
Os08g0535000	156.264	46.0495	46.2332	31.2505	36.1223	27.3573	32.3327	37.8362	27.8045	57.0323	41.3992	26.3706	43.9298	52.6288	32.2144	36.3253	38.925	24.1321	0.0008692	0.0276593
Os01g0952800	4284.02	19198.3	8649.46	1375.91	10027.4	4869.59	348.358	678.826	454.139	9657.14	4712.27	2875.49	1398.11	4964.29	3015.27	7.12261	3272.77	187.607	0.000876586	0.0278598
Os02g0327500	26.4446	10.9642	46.2332	26.7861	39.5625	50.6616	66.7513	28.9336	77.8525	563.44	122.128	320.842	393.458	85.9245	223.353	401.715	98.3369	126.888	0.000884775	0.0280853
Os01g0629750	5499.27	694.032	725.284	451.793	509.152	602.873	464.13	803.463	552.382	764.036	563.029	445.004	750.627	718.544	629.254	540.606	689.382	439.827	0.000897052	0.0282296
Os01g0714600	38.4649	27.4104	9.63192	17.8574	8.60055	6.07939	18.7738	8.90264	11.1218	299.911	39.3293	146.137	239.704	19.333	125.636	197.296	47.1198	39.7012	0.000898116	0.0282296
Os10g0340301	2.40405	67.9778	1.92638	16.9646	0	0	0	0	0	43.2659	4.13992	0	3.81998	2.14811	0	2.84904	0	0	0.00089632	0.0282296
Os10g0405300	3788.79	1024.05	714.688	1097.34	786.95	697.104	649.782	824.607	658.039	1002	693.437	716.401	889.101	845.282	848.312	787.76	587.973	624.32	0.000892069	0.0282296
Os03g0779300	39.6669	39.471	26.0062	10.7145	44.7228	19.2514	16.6878	24.4822	20.3899	18.683	31.0494	10.9877	3.81998	15.0368	6.44287	24.2169	34.8276	31.1382	0.000897802	0.0282296
Os05g0584200	2009.79	583.294	552.872	606.26	435.188	288.771	383.82	625.41	470.822	936.116	572.344	557.079	713.382	403.845	646.435	844.029	489.636	569.829	0.000897615	0.0282296
Os07g0283125	51.6872	65.785	69.3498	85.7157	63.644	81.0586	40.6766	55.6415	85.267	60.9656	12.4198	39.5559	36.2899	10.7406	17.181	4.27356	8.19474	3.11382	0.000892582	0.0282296
Os09g0337300	2613.21	564.654	312.074	715.19	436.048	449.875	354.616	357.218	245.606	783.702	625.128	761.451	827.982	764.728	633.549	686.619	740.6	648.452	0.000896055	0.0282296
Os05g0332600	152.657	58.1101	23.1166	29.4648	15.481	14.1852	27.1177	27.8207	21.3167	30.4828	21.7346	16.4816	18.1449	36.5179	36.5096	29.2027	19.4625	10.1199	0.000902814	0.0283426
Os10g0467000	177.9	98.6775	52.9756	87.5014	105.787	48.6351	35.4616	40.0619	50.9748	61.9489	51.749	37.3583	52.5248	61.2212	28.9929	42.7356	30.7303	23.3536	0.000904337	0.028347
Os03g0412400	96.1622	15.3498	13.4847	14.2859	5.16033	28.3705	12.5159	8.90264	11.1218	229.113	87.9733	170.31	153.754	68.7396	158.924	148.15	96.2882	76.2885	0.000905161	0.028347
Os02g0127900	206.749	118.413	163.743	214.289	172.011	152.998	196.082	165.812	142.73	177.98	101.428	99.9885	211.054	115.998	123.488	156.697	116.775	119.882	0.000914126	0.0285336
Os02g0205500	48.0811	2.19283	2.88958	0.892871	5.16033	2.02646	2.08598	1.11283	1.85363	94.3983	1.03498	31.8645	53.4798	7.51839	20.4024	71.2261	11.2678	10.8984	0.000914058	0.0285336
Os08g0404900	91.3541	13.157	0	8.92871	10.3207	1.01323	2.08598	6.67698	0	5.89989	0	0	1.90999	0	0	1.42452	2.04868	0	0.000915321	0.0285336
Os08g0535200	86.5459	24.1212	96.3192	171.431	281.238	262.427	270.134	270.418	265.996	384.476	306.354	402.151	449.803	200.849	152.481	324.791	235.599	531.684	0.000915563	0.0285336
Os01g0645900	1188.8	387.035	468.111	469.65	346.602	297.89	288.908	389.49	363.312	409.059	172.842	164.816	254.029	223.404	196.508	193.735	130.091	168.925	0.000917091	0.0285465
Os03g0226200	1811.45	388.131	658.823	1560.74	484.211	775.122	578.859	686.616	370.726	1088.53	430.552	461.485	887.191	465.066	524.02	501.432	106.532	524.678	0.000922871	0.0286917
Os11g0474900	0	0	0	0	0	0	0	0	3.70726	51.1324	37.2593	79.1118	22.9199	16.1108	74.0931	13.533	4.09737	63.8332	0.000929336	0.0288102
Os11g0671000	16006.2	2177.48	1364.84	2877.72	2128.64	1642.45	1433.07	1589.12	987.058	3581.23	3465.11	3943.5	3086.55	3948.23	2987.35	3830.54	3886.36	3507.71	0.00093005	0.0288102
Os07g0621400	170.688	65.785	49.1228	36.6077	36.9824	32.4234	47.9775	17.8053	39.853	31.4661	39.3293	36.2596	63.0297	66.5915	61.2073	54.1318	45.0711	37.3658	0.000927891	0.0288102
Os04g0612301	96.1622	323.443	473.89	243.754	402.506	190.488	384.863	397.28	618.186	145.531	449.181	475.769	246.389	425.326	651.804	1017.11	1108.34	748.095	0.000933452	0.0288808
Os01g0292700	292.093	493.387	215.755	278.576	306.179	127.667	175.222	225.904	162.193	245.829	282.55	179.1	141.339	256.699	237.313	192.31	271.451	118.325	0.000935631	0.0289134
Os02g0826200	114.193	184.198	190.712	173.217	239.095	252.295	294.123	318.269	303.069	143.564	261.85	162.619	185.269	257.773	153.555	219.376	234.574	286.471	0.000943472	0.0290857
Os05g0303700	0	0	1.92638	5.35723	3.44022	14.1852	16.6878	2.22566	11.1218	11.7998	0	8.7902	1.90999	2.14811	7.51669	2.84904	0	1.55691	0.000942441	0.0290857
Os01g0307686	7.21216	33.9889	3.85277	54.4652	18.9212	16.2117	10.4299	2.22566	7.41452	151.431	24.8395	29.6669	19.0999	6.44434	23.6239	22.7923	2.04868	1.55691	0.000950695	0.0292732
Os06g0682900	817.378	256.561	208.049	268.754	182.332	220.885	143.932	228.13	146.437	225.179	164.562	86.8032	157.574	149.294	98.7907	138.891	131.116	95.7499	0.00096855	0.0297873
Os07g0142802	87.748	145.823	74.1658	116.966	95.4661	53.7013	31.2897	42.2875	48.1944	52.1157	23.8045	31.8645	23.8749	22.5552	30.0667	5.69809	18.4382	5.44918	0.000970917	0.0297955
Os08g0331000	63.7074	24.1212	3.85277	17.8574	3.44022	0	2.08598	4.45132	1.85363	115.048	68.3087	92.2971	52.5248	32.2217	106.307	19.231	16.3895	26.4674	0.000971138	0.0297955
Os07g0258400	947.197	10656.1	4553.97	642.867	5953.3	2418.58	164.792	367.234	212.241	4202.69	2222.1	1039.44	916.796	2665.81	1161.87	2.13678	1477.1	143.236	0.000976811	0.0299338
Os09g0547500	340.174	93.1954	68.3866	153.574	88.5856	68.8998	109.514	100.155	40.7799	750.27	342.579	562.573	594.963	247.033	482.142	496.446	329.838	344.855	0.00098051	0.0300113
Os05g0423701	9.61622	6.5785	9.63192	10.7145	12.0408	7.09262	0	0	0	28.5161	6.20988	2.19755	12.4149	13.9627	12.8857	11.3962	15.3651	7.78454	0.000992034	0.0303279
Os01g0172800	2063.88	658.946	627.038	600.01	564.196	439.743	411.981	509.676	462.481	471.991	423.307	285.681	418.288	384.512	389.794	361.828	423.053	277.908	0.000996752	0.0304359
Os01g0130900	447.154	175.427	127.141	161.61	122.988	242.162	182.523	220.34	165.9	524.107	218.381	261.508	488.003	243.811	317.848	1334.06	388.226	359.646	0.00100065	0.0305185
Os01g0588400	74.5257	19.7355	7.70554	23.2147	23.2215	2.02646	12.5159	4.45132	1.85363	25.5662	18.6296	21.9755	15.2799	15.0368	12.8857	27.0659	20.4868	8.563	0.00100632	0.0306551
Os11g0592100	180.304	88.8097	7.70554	108.037	25.8016	8.10586	16.6878	17.8053	3.70726	187.813	300.144	156.026	72.5797	51.5547	107.381	105.415	90.1421	80.1808	0.00100905	0.0307019
Os03g0266300	1507.34	293.84	143.516	372.327	197.813	238.11	173.136	213.663	118.632	427.742	256.675	285.681	327.564	361.957	274.896	302.711	230.477	278.687	0.00101467	0.0308365
Os08g0428200	46.8791	9.86775	10.5951	10.7145	8.60055	14.1852	13.5589	7.78981	5.56089	29.4995	8.27984	12.0865	18.1449	13.9627	21.4762	9.97165	2.04868	3.89227	0.00102508	0.0311158
Os07g0170000	15.6264	2.19283	1.92638	8.03584	1.72011	0	0	0	0	7.86652	2.06996	0	12.4149	0	0	4.98582	4.09737	0.778454	0.00102819	0.0311733
Os03g0291500	2970.21	783.938	197.454	526.794	609.779	221.898	162.706	117.96	278.971	1502.51	1972.67	2407.42	1027.58	903.281	1073.81	1674.52	2260.72	1996.74	0.00103151	0.0312373
Os03g0291800	944.793	965.943	1364.84	958.944	1434.57	1323.28	1235.94	1667.02	1434.71	849.585	1267.85	1140.53	1073.42	1350.09	1431.39	997.165	1433.06	1083.61	0.00103407	0.0312778
Os03g0327800	199.536	116.22	98.2456	516.08	172.011	101.323	100.127	109.057	74.1452	412.009	362.243	312.052	233.974	177.219	301.741	191.598	197.698	201.62	0.00103703	0.0313304
Os04g0403500	2382.42	3372.58	3777.64	2122.36	3042.87	2262.55	2689.87	3588.87	3796.23	1431.71	2289.38	1878.9	1266.32	2033.19	2208.83	1868.26	2712.46	1648.77	0.00104351	0.0314893
Os11g0552000	76.9297	167.752	57.7915	69.644	73.9647	55.7278	41.7196	43.4003	59.3162	132.748	35.1893	35.1608	187.179	162.182	36.5096	29.9149	45.0711	12.4553	0.00104659	0.0315082
Os09g0420700	760.883	185.294	150.258	182.146	159.97	130.707	183.566	107.944	153.851	165.197	110.743	129.655	148.979	127.813	141.743	143.164	131.116	93.4145	0.00104625	0.0315082
Os03g0225900	164.678	144.727	61.6443	40.1792	81.7052	63.8336	83.4391	68.9954	52.8285	905.634	727.591	829.575	720.067	239.515	419.861	480.776	270.426	267.01	0.00106434	0.0320049
Os02g0175950	164.678	25.2176	17.3375	35.7149	18.9212	16.2117	40.6766	31.1592	19.4631	137.664	48.6441	54.9387	106.005	113.85	119.193	114.674	93.2152	78.6239	0.00106732	0.0320462
Os02g0227200	1359.49	853.012	438.252	695.547	487.651	487.365	588.246	616.508	452.286	998.065	559.924	737.278	871.911	707.803	743.078	642.459	538.804	504.438	0.00106934	0.0320462
Os08g0156100	7.21216	1.09642	0.963192	18.7503	10.3207	4.05293	8.34391	7.78981	5.56089	19.6663	0	2.19755	29.6049	8.59245	5.36906	0	1.02434	1.55691	0.00106945	0.0320462
Os10g0533500	262.042	482.423	834.124	377.685	675.143	623.138	638.309	883.587	720.135	337.277	653.073	575.758	509.013	777.617	763.481	539.894	809.231	557.373	0.00107576	0.0321974
Os01g0127700	393.063	122.799	140.626	108.93	121.268	94.2306	103.256	148.006	108.437	943.983	160.422	321.941	449.803	155.738	278.117	737.19	208.966	186.051	0.00107829	0.0322356
Os02g0185300	20.4345	6.5785	0.963192	7.14297	4.30027	1.01323	2.08598	1.11283	0	12.7831	3.10494	0	6.68497	1.07406	2.14762	4.98582	0	1.55691	0.00108222	0.0323156
Os09g0439400	334.164	491.195	788.854	742.869	787.81	959.531	865.681	921.423	1168.71	723.72	802.11	813.093	829.892	750.765	749.521	861.123	804.109	933.367	0.00108887	0.0324765
Os03g0129300	44817.6	87290.1	76931.1	44805.2	67559.9	47527.7	49971.7	64285.9	70913.4	36404.3	45523.6	38105.5	27911.7	48390.5	45709	33681.4	53990	32480.2	0.00109348	0.0325759
Os01g0639900	81597.2	132312	135109	64028.7	120793	63363.5	81448.1	95101.3	125414	41691.6	100230	69290.9	31189.2	78172	74537.6	63104.9	97784.8	60394.8	0.00109815	0.0326662
Os11g0263000	33.6568	47.1459	31.7853	10.7145	23.2215	17.2249	12.5159	11.1283	9.26815	57.0323	20.6996	43.951	21.0099	12.8887	20.4024	14.9575	18.4382	15.5691	0.00110032	0.0326662
Os03g0416500	171.89	247.79	128.105	274.112	211.573	200.62	146.018	134.652	114.925	294.995	249.43	167.014	213.919	214.811	122.415	205.843	120.872	157.248	0.0010991	0.0326662
Os01g0743500	0	13.157	11.5583	113.395	3.44022	16.2117	6.25793	0	1.85363	188.797	0	4.3951	8.59496	0	0	1.42452	6.14605	1.55691	0.00110187	0.0326743
Os09g0491772	259.638	70.1706	62.6075	83.037	41.2826	62.8204	73.0092	77.8981	53.7553	113.081	28.9795	24.173	80.2197	38.666	28.9929	26.3536	30.7303	32.6951	0.00110577	0.0327521
Os03g0571900	545.72	98.6775	99.2088	168.753	99.7663	81.0586	85.5251	91.252	86.1938	146.514	48.6441	81.3093	105.05	89.1467	91.2741	39.1743	44.0467	56.8272	0.00110982	0.0328342
Os01g0882400	163.476	69.0742	41.4173	60.7153	69.6644	63.8336	54.2354	23.3694	35.219	46.2158	18.6296	20.8767	59.2098	35.4439	17.181	28.4904	9.21908	22.5752	0.00111296	0.0328893
Os12g0115100	22173.8	4454.74	3422.22	4495.61	3094.48	2700.26	2782.69	3834.81	3168.78	3615.65	1523.49	1801.99	2008.36	1794.75	2488.02	2336.93	2571.1	1910.33	0.00111524	0.0329187
Os01g0212900	14.4243	13.157	53.9387	3.57149	29.2419	20.2646	22.9458	35.6105	25.024	9.83315	33.1194	21.9755	9.54996	25.7773	10.7381	27.0659	75.8013	54.4918	0.00111654	0.0329193
Os02g0571900	42.0709	7.67491	0.963192	2.67861	0	2.02646	0	0	0	18.683	7.24486	27.4694	12.4149	0	8.5905	0.712261	4.09737	3.11382	0.00112488	0.0331273
Os10g0515200	442.346	58.1101	60.6811	59.8224	64.5041	38.5028	18.7738	44.5132	24.0972	69.8154	28.9795	59.3338	61.1197	57.999	57.9859	34.9008	53.2658	24.9105	0.00112649	0.0331367
Os01g0142500	596.205	559.172	519.16	649.118	556.455	520.801	419.282	481.855	381.848	521.157	412.957	377.978	490.868	470.437	435.968	386.045	369.788	375.993	0.00114584	0.0336672
Os02g0232000	88.95	38.3746	4.81596	12.5002	18.0611	7.09262	6.25793	6.67698	9.26815	36.3827	10.3498	7.69142	9.54996	17.1849	6.44287	13.533	3.07303	3.11382	0.00115435	0.0338013
Os02g0664000	1848.72	1185.23	752.253	873.228	762.868	610.979	700.889	898.053	794.281	943.983	493.686	503.239	823.207	523.065	531.537	507.13	479.392	465.516	0.00115376	0.0338013
Os03g0139500	16.8284	13.157	9.63192	21.4289	18.9212	6.07939	6.25793	3.33849	7.41452	1.96663	0	0	21.0099	2.14811	0	0	0	0	0.00115425	0.0338013
Os10g0130701	92.5561	10.9642	7.70554	14.2859	6.88044	4.05293	2.08598	4.45132	5.56089	5.89989	0	1.09877	4.77498	1.07406	4.29525	7.12261	2.04868	2.33536	0.00115703	0.0338412
Os01g0238500	10835.1	24833.8	21151.7	11997.5	18522.1	14931	14043.8	17178.7	18241.6	4492.77	9747.45	4867.57	4087.38	10790	7886.08	5850.51	9973	4176.41	0.00115897	0.0338593
Os03g0183300	19612.3	2357.3	2553.42	4365.25	2630.05	2882.64	3708.87	3369.65	3046.44	8335.57	5874.55	6272.9	9104.93	6760.11	6201.27	10292.2	7310.73	6909.56	0.00116124	0.0338871
Os03g0381500	439.942	88.8097	72.2394	86.6085	43.0027	30.397	54.2354	53.4158	31.5117	39.3326	26.9095	54.9387	32.4699	42.9622	49.3954	22.7923	29.7059	28.8028	0.00116565	0.0339771
Os03g0786400	6700.1	5201.4	4243.82	3061.66	4559.15	3889.8	3138.35	4103	3146.54	1865.35	2917.61	2275.56	2595.68	3494.98	2961.57	1623.24	3078.15	1988.95	0.00116726	0.0339856
Os01g0844000	3103.63	268.622	264.878	233.932	291.559	281.678	278.478	326.059	207.607	312.694	288.76	265.903	436.433	413.512	413.418	357.555	343.155	303.597	0.00117102	0.0340563
Os01g0627500	330.557	146.92	61.6443	100.894	136.749	56.741	45.8915	111.283	68.5843	82.5985	43.4692	26.3706	65.8947	33.2957	36.5096	38.4621	21.5112	14.7906	0.0011748	0.0341276
Os11g0485500	15601.1	1258.69	1066.25	774.12	1102.59	976.756	859.423	1429.99	1113.1	1251.76	1239.91	1184.48	918.706	1266.31	1215.56	1089.76	1034.59	965.283	0.00118319	0.0343325
Os04g0679400	2783.89	399.096	384.314	894.657	567.636	565.383	474.56	393.942	341.995	2643.15	2115.5	2477.74	3128.57	2658.29	2018.77	3445.92	2168.53	2466.92	0.00118483	0.0343414
Os01g0915900	81.7378	0	3.85277	23.2147	5.16033	20.2646	16.6878	8.90264	0	290.078	109.708	128.557	156.619	42.9622	82.6836	71.9383	28.6816	18.6829	0.00118826	0.0343573
Os11g0543500	738.045	1475.78	1191.47	727.69	1143.87	707.236	734.264	918.084	1038.03	399.226	647.898	393.361	319.924	649.804	496.101	352.569	684.261	256.89	0.00119207	0.0343573
Os03g0267300	15204.4	14472.7	14108.8	7934.06	12611.8	10082.7	9708.14	13484.2	12553.7	8934.4	11421	11052.6	7384.98	12743.7	11902.1	8415.36	13503.9	9074.44	0.00119112	0.0343573
Os03g0788500	31.2527	24.1212	25.043	42.8578	49.8832	59.7807	67.7943	36.7234	54.6821	140.614	61.0638	80.2105	99.3196	57.999	95.5693	156.697	74.777	100.421	0.00119013	0.0343573
Os07g0274700	712.802	247.79	105.951	151.788	139.329	132.733	148.104	234.807	128.827	460.192	99.3581	210.965	214.874	93.4429	150.334	136.754	79.8987	106.648	0.00118751	0.0343573
Os07g0122100	79.3338	10.9642	10.5951	8.92871	32.6821	9.11909	8.34391	4.45132	5.56089	116.031	24.8395	46.1485	44.8848	10.7406	49.3954	25.6414	8.19474	6.22763	0.00119438	0.0343852
Os11g0661800	127.415	70.1706	72.2394	90.18	55.0435	42.5557	34.4186	20.0309	50.9748	403.159	72.4486	141.742	149.934	69.8137	200.803	391.743	104.483	81.7377	0.00120117	0.0345421
Os01g0690600	54.0912	10.9642	3.85277	12.5002	17.2011	2.02646	4.17196	0	4.63408	103.248	27.9445	70.3216	38.1998	19.333	38.6572	15.6697	6.14605	17.126	0.00120598	0.0346029
Os11g0177400	435.134	556.98	314.001	317.862	298.439	236.083	164.792	217.002	270.63	116.031	190.436	143.939	130.834	229.848	239.46	121.797	135.213	119.104	0.00120485	0.0346029
Os03g0219500	582.983	299.322	216.718	243.754	184.912	194.541	241.973	237.033	193.704	259.595	175.947	194.483	271.219	219.107	243.755	200.145	199.747	188.386	0.00121609	0.0348539
Os03g0410300	793.338	769.684	679.05	717.869	574.517	627.191	559.042	524.143	503.261	804.352	559.924	420.831	681.867	567.102	530.463	574.082	477.344	464.737	0.00121864	0.0348881
Os09g0246300	373.83	234.633	147.368	719.654	412.826	541.066	330.628	163.586	293.8	2022.68	2225.21	2795.28	2435.24	2325.33	1721.32	2826.96	809.231	1686.91	0.00122011	0.0348914
Os04g0316200	26.4446	48.2423	17.3375	21.4289	13.7609	24.3176	8.34391	2.22566	17.6095	492.641	337.404	1326.22	302.734	224.478	836.5	258.551	324.717	523.121	0.00122194	0.0349049
Os01g0824800	290.891	24.1212	20.227	46.4293	46.443	12.1588	31.2897	17.8053	9.26815	169.13	71.4136	129.655	131.789	50.4806	140.669	94.7307	93.2152	49.8211	0.00122413	0.0349285
Os01g0107000	1429.21	870.555	665.566	630.367	546.995	400.227	522.537	528.594	580.186	580.156	592.009	535.103	513.788	502.658	635.697	491.46	475.295	428.15	0.00122929	0.0350368
Os01g0830500	2047.05	1042.69	471.964	809.834	669.983	633.27	435.969	537.497	419.847	1178.01	668.597	863.637	893.876	866.763	724.823	787.76	951.614	572.942	0.00123801	0.0352463
Os12g0153200	115.395	21.9283	1.92638	42.8578	21.5014	4.05293	12.5159	13.354	7.41452	41.2992	0	0	19.0999	3.22217	8.5905	11.3962	2.04868	0	0.00124361	0.0353665
Os02g0572200	46.8791	39.471	30.8221	21.4289	20.6413	6.07939	16.6878	26.7079	7.41452	27.5328	35.1893	16.4816	13.3699	32.2217	23.6239	15.6697	20.4868	7.78454	0.00124522	0.0353731
Os03g0198600	127.415	13.157	15.4111	14.2859	20.6413	14.1852	22.9458	22.2566	12.9754	196.663	110.743	130.754	167.124	127.813	79.4621	177.353	61.4605	70.8393	0.0012475	0.0353985
Os01g0155000	74.5257	13.157	17.3375	16.0717	8.60055	8.10586	12.5159	8.90264	16.6827	29.4995	10.3498	30.7657	19.0999	6.44434	2.14762	5.69809	8.19474	3.11382	0.00125589	0.0355457
Os08g0120000	1198.42	532.858	709.872	1072.34	802.431	986.888	1353.8	1227.45	1069.54	962.666	713.101	988.897	1288.29	824.875	1044.82	1104	945.468	1127.98	0.00125683	0.0355457
Os09g0272600	480.811	15.3498	12.5215	41.0721	1.72011	10.1323	8.34391	20.0309	1.85363	37.366	31.0494	48.3461	36.2899	17.1849	57.9859	47.0092	26.6329	43.5934	0.00125432	0.0355457
Os06g0186300	20.4345	48.2423	43.3436	45.5364	49.8832	56.741	60.4934	71.2211	86.1938	39.3326	51.749	63.7289	58.2548	68.7396	70.8716	48.4337	75.8013	63.8332	0.00125837	0.0355499
Os09g0128400	1574.66	1331.05	851.462	1591.99	1193.76	884.551	631.008	744.483	820.231	2695.27	1410.68	1656.95	2009.31	1884.97	1296.09	2769.98	1575.44	1303.13	0.00126	0.0355568
Os05g0568100	526.488	383.746	146.405	502.687	176.311	178.329	83.4391	130.201	139.022	530.007	80.7285	94.4946	135.609	100.961	148.186	78.3487	89.1178	68.504	0.00127101	0.0358283
Os01g0653700	293.295	229.151	266.804	309.826	245.976	267.493	200.254	175.827	200.192	239.929	209.066	175.804	282.679	196.552	236.239	195.872	187.455	193.057	0.00127574	0.0359222
Os06g0724700	40.8689	43.8567	26.9694	42.8578	27.5217	35.4631	11.4729	18.9181	15.7559	50.1491	45.5391	42.8522	27.6949	22.5552	17.181	40.5989	33.8033	44.3719	0.00127783	0.0359342
Os07g0695800	538.508	556.98	704.093	684.832	665.682	962.57	1078.45	626.523	919.401	909.567	704.822	814.192	767.817	626.175	778.514	896.024	669.92	944.265	0.00127897	0.0359342
Os02g0776400	78.1318	17.5427	70.313	58.9295	34.4022	58.7675	129.331	135.765	135.315	52.1157	76.5885	61.5314	42.0198	37.592	85.905	120.372	82.9717	98.8637	0.00128521	0.0360581
Os05g0119100	73.3236	32.8925	4.81596	35.7149	2.58016	1.01323	2.08598	0	10.195	49.1658	11.3848	4.3951	21.0099	7.51839	7.51669	9.25939	0	1.55691	0.00128618	0.0360581
Os08g0249900	206.749	259.851	319.78	262.504	338.862	267.493	276.392	387.265	363.312	22.6163	28.9795	41.7534	24.8299	52.6288	86.9788	46.2969	90.1421	59.941	0.00128901	0.0360979
Os01g0800300	752.469	294.936	302.442	429.471	221.034	274.586	280.564	301.577	265.996	377.593	223.556	307.657	300.824	269.588	241.608	388.894	230.477	247.548	0.0012943	0.0362066
Os02g0677300	127.415	0	25.043	14.2859	5.16033	16.2117	10.4299	11.1283	64.8771	367.76	16.5597	10.9877	546.258	15.0368	10.7381	2022.11	6.14605	7.78454	0.00129815	0.0362747
Os02g0567000	411.093	296.032	228.276	262.504	238.235	220.885	263.876	227.017	223.362	313.678	218.381	212.063	287.454	226.626	239.46	295.588	196.674	226.53	0.00130238	0.0363533
Os10g0569600	473.599	12.0606	109.804	75.0012	98.0462	29.3837	36.5046	14.4668	6.48771	117.998	68.3087	61.5314	80.2197	2.14811	84.8312	79.0609	9.21908	24.1321	0.0013114	0.0365654
Os03g0102700	21.6365	26.314	47.1964	49.1079	55.9036	118.548	93.869	102.38	50.048	108.165	170.772	235.138	99.3196	100.961	152.481	136.754	166.968	205.512	0.00131673	0.0366743
Os09g0454600	76.9297	84.4241	48.1596	192.86	75.6848	20.2646	27.1177	55.6415	36.1458	490.674	123.163	207.668	246.389	86.9986	146.038	108.264	62.4849	71.6178	0.00132021	0.0367314
Os12g0550800	86.5459	21.9283	25.043	121.431	70.5245	18.2382	6.25793	13.354	25.9508	446.425	87.9733	279.089	165.214	133.183	98.7907	254.989	47.1198	76.2885	0.00132678	0.0368741
Os03g0151500	33.6568	39.471	5.77915	43.7507	10.3207	20.2646	18.7738	11.1283	12.9754	31.4661	2.06996	2.19755	42.0198	1.07406	2.14762	4.27356	0	1.55691	0.00133494	0.0370609
Os10g0572400	802.954	525.183	327.485	420.542	364.663	320.181	338.971	343.864	309.556	546.723	331.194	282.385	457.443	322.217	354.358	240.032	291.938	270.124	0.00134157	0.0372046
Os02g0318100	87.748	19.7355	25.043	61.6081	22.3614	37.4896	38.5906	57.8671	34.2922	17.6997	51.749	30.7657	114.6	86.9986	57.9859	21.3678	16.3895	11.6768	0.0013495	0.0373842
Os07g0665200	3740.71	2566.71	2349.23	2786.65	2094.23	2105.5	2001.5	2255.71	2140.02	2891.93	1876.42	1497.63	1621.58	1413.46	1522.67	1407.43	1329.6	1390.32	0.00135421	0.0374339
Os08g0151900	32.4547	15.3498	3.85277	8.03584	5.16033	4.05293	6.25793	1.11283	0	9.83315	0	1.09877	0	0	0	4.27356	0	0	0.0013535	0.0374339
Os03g0586400	138.233	83.3276	179.154	223.218	120.408	127.667	227.372	161.36	242.826	105.215	94.1832	156.026	124.149	99.8872	120.267	103.278	57.3632	97.3068	0.00135668	0.0374618
Os03g0370800	191.122	85.5205	109.804	93.7515	63.644	73.9659	44.8485	54.5286	52.8285	44.2492	41.3992	64.8277	71.6247	91.2948	84.8312	53.4196	52.2415	76.2885	0.00137207	0.0378055
Os06g0191300	808.964	1060.23	879.394	691.083	817.052	702.17	721.748	890.264	911.986	783.702	953.217	826.278	654.172	1103.06	845.09	735.765	882.983	735.639	0.00137081	0.0378055
Os11g0139700	1550.61	1552.53	1386.03	2189.32	1504.24	1273.63	1124.34	938.115	1069.54	2459.27	1957.15	2050.31	3162.95	2499.33	1830.85	3809.17	1612.32	1796.67	0.00138405	0.0380948
Os09g0471100	134.627	64.6886	157.963	84.8228	53.3234	91.1909	134.546	104.606	105.657	218.296	119.023	243.928	169.034	144.998	318.922	294.876	233.55	260.004	0.00138778	0.0381564
Os05g0586050	1797.03	715.96	419.952	436.614	610.639	348.552	277.435	434.003	291.947	409.059	441.937	342.818	307.509	489.77	302.815	284.192	665.823	345.634	0.00139211	0.0382346
Os01g0826400	33.6568	52.628	44.3068	71.4297	29.2419	34.4499	38.5906	8.90264	50.9748	1313.71	121.093	435.115	974.096	86.9986	292.077	1760	160.822	221.081	0.00139555	0.0382777
Os03g0407900	102.172	40.5674	26.9694	101.787	51.6033	75.9924	60.4934	46.7388	60.243	110.131	41.3992	107.68	128.924	69.8137	70.8716	79.7732	36.8763	51.378	0.00139666	0.0382777
Os05g0580000	301.709	253.272	285.105	406.257	408.526	471.153	773.898	496.322	465.261	523.124	451.251	219.755	279.814	216.959	157.85	311.97	227.404	389.227	0.00140045	0.0383243
Os07g0537500	144.243	59.2065	70.313	128.573	63.644	121.588	118.901	72.3339	115.852	1219.31	624.093	992.193	946.401	850.653	782.809	1500.02	885.032	921.69	0.00140134	0.0383243
Os01g0808100	231.991	405.674	240.798	379.47	272.637	192.514	161.663	126.863	145.51	503.458	293.934	353.805	389.638	418.882	319.996	299.862	218.185	260.782	0.00140431	0.0383645
Os08g0141400	76.9297	89.9061	140.626	137.502	75.6848	115.508	133.503	130.201	150.144	310.728	89.0083	207.668	148.979	81.6283	122.415	79.0609	76.8257	106.648	0.0014082	0.0384301
Os01g0912850	39.6669	0	1.92638	0	0	1.01323	4.17196	3.33849	0	80.6319	80.7285	86.8032	27.6949	23.6292	37.5834	73.3629	46.0954	46.7073	0.00141483	0.0385483
Os09g0362900	163.476	169.945	292.81	310.719	279.518	299.917	372.347	363.895	405.018	189.78	250.465	288.978	295.094	294.291	243.755	476.502	298.084	406.353	0.00141554	0.0385483
Os01g0111700	70.9196	0	5.77915	12.5002	1.72011	2.02646	10.4299	6.67698	0	117.015	24.8395	57.1363	45.8398	10.7406	53.6906	27.0659	14.3408	17.126	0.00142626	0.0387991
Os11g0444900	201.941	51.5316	14.4479	36.6077	24.9416	22.2911	15.6448	16.6924	14.829	36.3827	9.31482	25.2718	34.3799	28.9995	25.7715	23.5046	29.7059	9.34145	0.00143212	0.0388455
Os11g0591100	1288.57	1613.92	1870.52	1331.27	1394.15	1432.71	1567.61	1652.55	1951.87	1628.37	1734.63	2155.8	1347.5	1509.05	2049.91	1577.66	1829.48	1747.63	0.00144154	0.0388455
Os12g0221600	51.6872	7.67491	8.66873	4.46436	7.74049	1.01323	7.30092	0	1.85363	7.86652	3.10494	5.49387	2.86499	0	1.07381	5.69809	1.02434	1.55691	0.00143286	0.0388455
Os03g0667300	588.993	484.616	124.252	23.2147	152.23	110.442	8.34391	4.45132	0	355.96	105.568	102.186	26.7399	139.627	45.1001	0	115.751	14.7906	0.00143805	0.0388455
Os04g0468600	361.81	24.1212	21.1902	30.3576	36.1223	21.2779	50.0635	37.8362	40.7799	1726.7	792.795	907.588	748.717	158.96	860.124	524.936	445.589	408.688	0.00143917	0.0388455
Os06g0550901	227.183	24.1212	28.8958	41.965	15.481	19.2514	19.8168	16.6924	19.4631	17.6997	18.6296	16.4816	23.8749	22.5552	41.8787	25.6414	20.4868	18.6829	0.00143866	0.0388455
Os08g0239900	24.0405	4.38567	12.5215	95.5372	10.3207	80.0453	18.7738	24.4822	28.7313	35.3994	5.1749	17.5804	15.2799	7.51839	15.0334	7.12261	9.21908	10.8984	0.0014354	0.0388455
Os09g0400500	121.405	31.7961	39.4909	48.2151	43.8628	35.4631	31.2897	21.1438	57.4625	306.794	27.9445	83.5069	212.964	51.5547	93.4217	368.239	108.58	73.9532	0.00144051	0.0388455
Os09g0529100	1816.26	1746.59	1681.73	1101.8	1408.77	1092.26	1429.94	1691.5	1797.09	1260.61	1223.35	1166.9	928.256	1074.06	1129.65	1151.01	1213.85	1173.91	0.00144158	0.0388455
Os08g0519000	49.2831	19.7355	17.3375	22.3218	8.60055	27.3573	5.21494	3.33849	13.9022	26.5495	14.4897	23.0743	35.3349	9.66651	12.8857	12.8207	7.1704	12.4553	0.00144996	0.0390304
Os04g0398000	138.233	471.459	65.4971	422.328	129.868	91.1909	46.9345	80.1237	68.5843	560.49	214.241	148.335	131.789	78.4061	109.529	154.561	81.9474	97.3068	0.00145648	0.0391238
Os05g0509500	192.324	158.98	31.7853	276.79	93.746	56.741	47.9775	74.5596	33.3653	337.277	112.813	182.397	163.304	90.2207	143.891	111.113	60.4362	80.9592	0.00145613	0.0391238
Os07g0678300	2129.99	1427.53	1516.06	830.37	1122.37	845.035	1498.78	1870.67	1741.49	882.034	401.572	450.498	509.968	337.254	415.565	1396.03	562.364	438.27	0.00145832	0.0391324
Os04g0649600	1734.52	255.465	118.473	202.682	154.81	139.826	45.8915	173.601	47.2676	402.176	369.488	394.46	330.429	358.735	457.444	352.569	332.911	423.479	0.00147119	0.0394365
Os03g0331700	1342.66	561.365	293.774	479.472	394.765	380.975	396.336	437.342	330.873	1534.96	577.519	935.057	1097.29	466.14	854.755	1263.55	671.969	649.231	0.00147357	0.0394591
Os01g0187300	9.61622	6.5785	0	16.0717	12.0408	8.10586	6.25793	2.22566	0	23.5996	14.4897	17.5804	5.72998	4.29622	4.29525	2.84904	6.14605	0.778454	0.00149127	0.0398915
Os11g0127600	66.1115	50.4352	25.043	101.787	32.6821	18.2382	27.1177	26.7079	27.8045	107.181	22.7696	37.3583	30.5599	15.0368	31.1406	59.8299	16.3895	23.3536	0.00149341	0.0399072
Os04g0630400	835.409	718.153	397.798	575.009	473.89	425.557	300.381	408.408	325.312	352.027	173.877	96.6922	278.859	148.22	186.843	187.325	152.627	50.5995	0.00150023	0.0400198
Os08g0233000	2288.66	259.851	222.497	189.289	223.614	201.633	192.953	284.884	177.022	282.212	233.906	250.521	255.939	344.772	274.896	247.154	260.183	198.506	0.00150074	0.0400198
Os11g0115400	19024.5	2006.44	1602.75	2532.18	1619.48	1480.33	1233.86	2155.55	1501.44	2351.11	1194.37	1370.17	1496.48	1239.46	2033.8	1694.47	2083.51	1672.9	0.00150579	0.0401102
Os05g0176700	5814.2	494.484	637.633	673.225	458.409	714.329	598.676	642.103	538.48	537.874	628.233	610.919	1060.05	1083.72	748.447	960.84	721.137	640.668	0.00150726	0.0401102
Os01g0221100	187.516	383.746	302.442	825.013	548.715	633.27	467.259	252.612	343.848	917.433	709.997	863.637	1130.72	871.06	881.6	913.118	902.446	663.243	0.00151271	0.0401721
Os01g0860450	39.6669	8.77133	1.92638	18.7503	12.9008	2.02646	5.21494	1.11283	4.63408	25.5662	5.1749	10.9877	15.2799	2.14811	6.44287	25.6414	6.14605	3.89227	0.00151228	0.0401721
Os01g0612800	338.972	162.27	157.963	133.931	91.1658	128.68	93.869	115.734	86.1938	127.831	76.5885	109.877	157.574	91.2948	93.4217	66.9525	81.9474	91.8576	0.00151715	0.0402068
Os10g0165400	4535.25	835.469	729.136	675.011	712.985	646.442	407.809	687.729	459.7	784.686	582.694	614.215	834.667	892.541	566.973	505.705	876.837	593.182	0.0015166	0.0402068
Os11g0116300	1052.98	824.505	2145.99	745.548	918.538	1422.58	2081.81	2290.2	2050.11	993.149	1836.06	1806.39	1327.44	1213.68	1785.75	1074.09	1650.22	1321.04	0.00152241	0.0402855
Os06g0160700	466.386	348.66	988.235	608.045	453.249	589.701	1112.87	1160.68	1515.34	265.495	136.617	153.828	234.929	168.627	187.917	202.994	219.209	196.17	0.00152326	0.0402855
Os01g0214600	744.055	1768.52	2023.67	1193.77	1127.53	1411.43	1791.86	2393.7	2319.82	942.016	1163.32	1414.12	875.731	784.061	1053.41	704.426	1365.45	1140.44	0.00152798	0.0403689
Os10g0195250	7073.93	8396.36	4344	1161.63	5248.91	2397.31	335.842	684.39	301.215	4956.89	3145.31	1588.83	1088.7	2928.95	1218.78	4.27356	1877.62	176.709	0.00153531	0.0404108
Os10g0534600	25.2426	4.38567	2.88958	1.78574	2.58016	0	5.21494	0	0	9.83315	3.10494	1.09877	7.63997	4.29622	0	7.83487	1.02434	3.11382	0.00153586	0.0404108
Os04g0678700	5945.23	7326.25	13184.2	5836.7	12273	16238.1	15426.8	23218.1	19187.9	5563.6	13712.5	7968.31	10335	9116.59	6967.97	11890.5	14440.2	15280.3	0.00153343	0.0404108
Os08g0549000	712.802	172.137	258.135	357.149	218.454	298.903	243.016	162.473	133.461	365.793	439.867	416.436	629.342	552.065	556.235	339.036	311.4	297.37	0.00153397	0.0404108
Os06g0220800	269.254	165.559	133.884	191.074	141.049	118.548	89.6971	71.2211	82.4865	323.511	171.807	279.089	187.179	215.885	269.527	187.325	192.576	211.74	0.00153957	0.0404668
Os02g0484200	536.104	414.445	84.7609	294.648	156.53	212.779	25.0317	122.411	78.7793	108.165	5.1749	3.29632	48.7048	147.146	18.2548	1.42452	8.19474	3.89227	0.00155138	0.0407356
Os01g0734600	671.933	1026.25	756.106	650.903	857.475	559.304	423.454	495.209	492.139	537.874	466.776	388.966	387.728	574.62	511.135	269.235	583.875	239.764	0.00155488	0.0407656
Os07g0418500	74.5257	55.9172	7.70554	69.644	9.4606	0	18.7738	2.22566	7.41452	60.9656	2.06996	41.7534	28.6499	8.59245	8.5905	4.27356	2.04868	3.11382	0.0015557	0.0407656
Os10g0540200	109.384	115.124	54.9019	166.967	114.387	65.8601	55.2784	40.0619	47.2676	128.814	119.023	110.976	130.834	197.626	172.884	115.386	152.627	91.0791	0.00155902	0.040811
Os01g0735300	16.8284	25.2176	33.7117	17.8574	29.2419	62.8204	92.826	100.155	75.9988	21.6329	93.1482	74.7167	43.9298	16.1108	30.0667	56.9809	106.532	77.8454	0.00156126	0.0408281
Os01g0747800	1202.03	397.999	409.357	403.578	411.966	335.38	379.648	421.762	414.286	1366.81	736.906	860.34	996.061	632.619	869.788	2361.86	712.942	715.399	0.00156846	0.0408657
Os03g0612600	756.075	813.541	910.216	679.475	782.65	898.737	1050.29	1148.44	1063.98	595.889	785.55	604.326	717.202	980.613	806.433	811.265	796.938	843.066	0.00156776	0.0408657
Os06g0721800	50.4851	32.8925	16.3743	1.78574	5.16033	4.05293	0	6.67698	3.70726	21.6329	7.24486	48.3461	26.7399	21.4811	28.9929	40.5989	14.3408	21.7967	0.00156623	0.0408657
Os08g0521200	36.0608	60.3029	89.5768	38.3935	66.2242	69.913	41.7196	46.7388	50.9748	26.5495	62.0988	57.1363	26.7399	74.1099	53.6906	36.3253	86.0448	56.0487	0.00156907	0.0408657
Os12g0555500	3652.96	664.428	470.038	308.934	331.121	221.898	508.979	553.076	344.775	2751.32	985.301	4823.62	625.522	355.513	2402.12	668.813	811.279	1904.88	0.00158207	0.0411626
Os08g0371200	132.223	252.176	183.006	102.68	192.652	222.911	138.718	241.484	171.461	155.364	371.558	382.374	139.429	222.33	239.46	237.183	247.891	221.081	0.00158869	0.0412931
Os03g0767900	573.367	217.09	177.227	365.184	174.591	183.395	127.245	124.637	157.559	197.646	136.617	176.903	164.259	163.257	208.32	207.98	108.58	144.792	0.00159321	0.0413263
Os08g0266300	1087.83	2032.76	1878.22	1034.84	1452.63	1307.07	1202.57	1554.62	1649.73	1217.34	1358.93	1170.19	978.871	1521.94	1416.36	1015.68	1516.03	1019.78	0.00159452	0.0413263
Os08g0478700	4636.22	1609.54	1230.96	1660.74	1368.35	1654.61	1857.56	2129.96	1709.97	5143.72	2276.96	2630.47	5834.07	3090.06	4721.55	7189.56	3124.24	3573.88	0.0015948	0.0413263
Os01g0750600	111.789	73.4599	69.3498	59.8224	54.1834	32.4234	60.4934	32.2721	67.6575	149.464	70.3787	70.3216	98.3646	64.4434	32.2144	148.862	57.3632	58.3841	0.00160185	0.0413838
Os02g0209400	260.84	39.471	3.85277	25.0004	10.3207	13.172	4.17196	13.354	0	59.9822	8.27984	48.3461	28.6499	6.44434	21.4762	21.3678	16.3895	6.22763	0.00160054	0.0413838
Os08g0518800	21.6365	2.19283	0	23.2147	0	10.1323	0	0	0	97.3482	0	6.59265	1.90999	2.14811	0	9.97165	2.04868	8.563	0.00159994	0.0413838
Os09g0483600	2.40405	7.67491	7.70554	39.2863	24.0815	42.5557	18.7738	34.4977	33.3653	17.6997	33.1194	10.9877	30.5599	38.666	37.5834	51.2828	22.5355	31.9166	0.00160418	0.0414023
Os03g0348500	63.7074	43.8567	45.27	48.2151	30.1019	18.2382	34.4186	21.1438	25.9508	52.1157	57.9589	57.1363	45.8398	32.2217	47.2477	27.0659	26.6329	19.4614	0.00160968	0.0415025
Os09g0241100	26.4446	20.8319	26.9694	33.9291	53.3234	56.741	66.7513	68.9954	69.5111	21.6329	42.4342	26.3706	68.7597	51.5547	31.1406	81.1977	48.1441	94.193	0.00161542	0.0416089
Os02g0526400	1478.49	1408.9	512.418	2801.83	573.656	769.043	608.063	474.065	537.553	5646.2	1490.37	3399.61	3234.57	2768.92	3283.72	4962.32	1359.3	2420.21	0.00162532	0.0417801
Os09g0472700	26.4446	13.157	9.63192	91.0729	18.9212	6.07939	2.08598	13.354	5.56089	156.347	417.097	98.8897	49.6598	44.0363	65.5026	109.688	140.335	79.4023	0.00162477	0.0417801
Os01g0369700	175.496	144.727	111.73	112.502	93.746	63.8336	46.9345	76.7852	75.9988	128.814	101.428	127.458	106.96	92.3688	114.898	64.8157	68.6309	77.067	0.0016284	0.0418174
Os01g0810300	5255.26	5119.17	4135.95	2805.4	3733.5	3233.22	2767.05	5096.76	4008.48	1713.92	1839.16	1682.22	1366.6	2483.22	1831.92	1208.71	2004.64	1031.45	0.00163283	0.041858
Os10g0133500	175.496	221.476	249.467	197.325	267.477	192.514	292.037	322.721	408.725	94.3983	144.897	129.655	148.979	103.109	83.7574	165.244	313.449	178.266	0.00163325	0.041858
Os04g0565500	709.196	172.137	278.362	479.472	234.795	206.699	219.028	225.904	263.215	1729.65	895.258	1524	1505.07	939.799	1565.62	2372.54	1192.33	1273.55	0.00164012	0.0419924
Os07g0464200	427.922	1188.52	889.989	730.369	917.678	562.344	526.709	711.098	572.772	411.026	614.778	585.647	398.233	693.84	672.207	329.777	733.429	419.587	0.00164237	0.0420081
Os03g0565200	3633.73	7158.5	7775.85	4471.5	6370.42	4960.78	5859.51	6611.32	8202.31	4234.16	6215.06	5918	3494.33	6467.97	6927.16	5824.16	8596.28	5744.99	0.001646	0.042059
Os07g0142100	19154.3	49303.7	17358.6	1091.98	19777.8	6281.02	361.917	1204.08	717.355	14021.1	4706.06	3770.99	1670.29	6706.41	3877.54	2.84904	4640.27	174.374	0.00165227	0.0421773
Os02g0697500	1460.46	2489.96	2286.62	2139.32	2414.17	2018.36	1791.86	2340.28	2563.57	1669.67	2024.42	1985.49	1945.33	2984.8	2724.26	1623.24	3102.73	1960.93	0.00165607	0.0422323
Os05g0172300	12.0203	37.2782	30.8221	33.9291	72.2446	84.0983	63.6223	71.2211	68.5843	15.733	57.9589	43.951	34.3799	55.8509	27.9191	33.4763	40.9737	65.3902	0.00165827	0.0422464
Os06g0670300	141.839	75.6527	48.1596	145.538	15.481	36.4764	20.8598	36.7234	42.6335	377.593	133.512	162.619	112.69	102.035	126.71	147.438	71.704	60.7194	0.00166364	0.0423411
Os01g0328700	4666.27	5507.3	5921.7	3060.76	5098.4	3917.15	4079.13	4295.52	4732.32	3159.39	3764.22	2974.38	2782.86	4040.6	3271.91	2592.63	3337.31	2718.36	0.00167634	0.0426222
Os06g0115300	447.154	266.429	541.314	426.793	414.546	354.631	678.986	619.846	707.16	346.127	218.381	250.521	351.439	225.552	332.882	382.484	313.449	305.933	0.00167975	0.0426574
Os07g0566150	269.254	23.0247	54.9019	37.5006	47.303	63.8336	16.6878	58.98	43.5603	287.128	19.6646	12.0865	236.839	22.5552	53.6906	544.879	40.9737	20.2398	0.00168105	0.0426574
Os02g0767600	48.0811	18.6391	71.2762	17.8574	58.4837	43.569	68.8373	120.186	137.169	17.6997	69.3437	63.7289	28.6499	85.9245	75.1669	56.2686	58.3875	94.9714	0.00168565	0.042732
Os03g0285800	231.991	83.3276	89.5768	104.466	104.067	74.9792	105.342	127.975	123.266	996.099	214.241	464.782	716.247	163.257	312.479	1206.57	298.084	265.453	0.00169155	0.0428392
Os04g0644300	543.316	240.115	197.454	205.36	204.693	176.302	178.351	164.699	186.29	287.128	196.646	173.606	196.729	133.183	169.662	150.287	136.238	158.026	0.00170165	0.0430526
Os05g0161500	5577.41	15727	11656.5	5355.44	10644	12633	7150.73	11070.4	8250.51	1525.12	3557.23	1119.65	2324.46	4055.64	3014.19	1253.58	2410.28	479.528	0.0017056	0.0431101
Os02g0122600	1292.18	185.294	130.031	226.789	150.51	97.2703	99.084	99.0418	101.95	381.526	360.173	509.831	413.513	556.361	531.537	407.413	595.143	509.888	0.00171034	0.0431448
Os04g0674400	538.508	221.476	157	346.434	138.469	179.342	223.2	271.53	141.803	382.51	129.373	212.063	301.779	221.256	144.965	217.24	146.481	165.811	0.00170866	0.0431448
Os06g0661766	465.184	337.696	227.313	332.148	301.879	285.731	235.716	199.196	234.484	554.59	399.502	363.694	539.573	499.436	409.123	534.908	271.451	335.514	0.00172287	0.0434182
Os01g0565800	21.6365	13.157	3.85277	1.78574	3.44022	0	9.3869	11.1283	0	9.83315	15.5247	2.19755	11.46	9.66651	2.14762	11.3962	3.07303	5.44918	0.00173757	0.0436209
Os02g0258800	460.376	1062.43	736.842	758.941	697.504	354.631	442.227	683.277	419.847	589.989	158.352	39.5559	148.979	59.0731	57.9859	34.9008	88.0935	32.6951	0.00173606	0.0436209
Os02g0758000	369.022	110.738	190.712	300.898	155.67	140.839	220.071	150.232	111.218	209.446	130.408	153.828	359.079	151.442	132.079	105.415	114.726	154.912	0.0017377	0.0436209
Os03g0843100	176.698	109.642	95.356	58.9295	65.3642	37.4896	60.4934	73.4467	63.9502	143.564	79.6935	96.6922	99.3196	77.332	120.267	114.674	73.7527	87.9653	0.00173522	0.0436209
Os01g0124200	6456.09	4551.22	1505.47	4597.4	1945.44	2445.94	1461.23	1800.56	1634.9	5634.4	2886.56	3060.09	1676.97	1939.75	2336.62	1706.58	2246.38	1833.26	0.00174141	0.0436713
Os04g0631600	298.103	132.666	141.589	169.646	94.606	122.601	99.084	114.621	92.6815	210.43	81.7635	115.371	157.574	147.146	167.515	157.41	110.629	98.8637	0.00174423	0.0436992
Os06g0126500	1265.73	1680.81	3041.76	1703.6	2223.24	2922.16	2750.36	3218.3	3106.68	1505.46	2393.91	2565.64	2057.06	2219	2296.88	1646.03	2517.83	2157.88	0.00175011	0.0438038
Os04g0295400	369.022	538.34	292.81	309.826	378.424	211.765	212.77	251.499	287.313	114.065	146.967	99.9885	151.844	164.331	154.629	114.674	131.116	81.7377	0.00175668	0.0438829
Os05g0498400	4091.7	2844.1	2671.89	3258.09	2099.39	1733.64	2047.39	2156.66	2292.01	4070.93	1934.38	2432.69	2707.41	2094.41	2776.88	3694.5	1877.62	2049.67	0.00175575	0.0438829
Os02g0649300	805.358	24.1212	21.1902	166.074	25.8016	23.3043	2.08598	10.0155	7.41452	24.5829	10.3498	0	6.68497	6.44434	17.181	4.27356	10.2434	0	0.00176533	0.044056
Os06g0494400	414.699	467.073	197.454	512.508	373.264	260.401	196.082	233.694	177.022	645.055	350.858	476.868	498.508	628.323	521.873	369.663	368.763	312.939	0.00177422	0.0442348
Os03g0748700	894.308	889.194	563.467	1016.09	657.082	509.656	567.386	524.143	461.554	1266.51	876.628	997.687	1029.49	1225.5	1040.52	725.081	795.914	708.393	0.00177788	0.0442832
Os01g0908600	491.629	421.024	632.817	336.613	418.847	608.952	607.02	757.837	589.454	235.012	408.817	475.769	396.323	494.066	530.463	256.414	348.276	319.945	0.00178793	0.0444472
Os02g0306401	1950.89	4413.08	1401.44	310.719	1703.77	947.372	579.902	746.709	604.283	2494.67	1038.09	1202.06	956.906	1390.9	1593.54	1925.95	2130.63	1131.87	0.00178647	0.0444472
Os03g0231600	157.466	141.438	35.6381	122.323	40.4226	39.516	17.7308	37.8362	37.0726	184.863	129.373	194.483	101.23	86.9986	95.5693	86.1835	50.1928	61.4979	0.00179423	0.0445608
Os05g0390932	2285.05	452.82	353.491	318.755	376.704	263.44	239.887	369.459	256.728	434.625	599.254	404.349	385.818	534.88	410.196	427.356	524.463	415.695	0.00179703	0.0445872
Os06g0282000	28.8486	19.7355	52.0124	10.7145	22.3614	12.1588	58.4074	48.9645	64.8771	47.1991	102.463	204.372	55.3898	75.1839	163.219	144.589	134.189	120.66	0.00180953	0.0448541
Os10g0392400	179.102	120.606	48.1596	163.395	78.265	87.1379	40.6766	22.2566	100.096	1059.03	139.722	212.063	440.253	119.22	163.219	1150.3	73.7527	70.8393	0.00181475	0.0448824
Os03g0342100	116.597	115.124	38.5277	94.6444	59.3438	29.3837	58.4074	60.0928	33.3653	207.48	174.912	186.792	202.459	198.7	168.589	168.094	116.775	101.199	0.00181317	0.0448824
Os08g0481700	138.233	10.9642	25.043	17.8574	9.4606	7.09262	18.7738	20.0309	6.48771	15.733	6.20988	21.9755	28.6499	21.4811	18.2548	34.1885	33.8033	52.9349	0.00181592	0.0448824
Os12g0616500	9.61622	81.1348	7.70554	38.3935	5.16033	2.02646	4.17196	0	0	57.0323	107.638	40.6547	9.54996	10.7406	19.3286	19.231	2.04868	10.8984	0.00182807	0.0451392
Os02g0832500	2047.05	1843.08	1552.67	1797.35	1647.86	1505.66	1609.33	1491.19	1425.44	1603.79	1409.64	1266.89	1387.61	1409.16	1284.28	1166.68	1257.89	1162.23	0.00183269	0.0451666
Os03g0141200	2579.55	3667.51	1374.47	2480.4	1691.73	1347.6	928.26	1357.65	1052.86	3061.06	1202.65	1315.23	1644.5	1887.12	1671.93	1414.55	1327.55	950.493	0.00183132	0.0451666
Os04g0572400	16.8284	4.38567	5.77915	9.82159	0	23.3043	11.4729	4.45132	46.3408	61.9489	6.20988	6.59265	179.539	4.29622	2.14762	462.969	11.2678	4.67073	0.00183646	0.0452161
Os01g0884300	2718.99	2912.08	2250.02	3909.88	2439.12	2538.15	1412.21	1948.56	1599.68	6628.53	2410.47	2585.42	4681.39	3279.09	2744.66	4516.45	2511.69	1665.89	0.00184321	0.0452953
Os03g0171900	325.749	395.806	545.167	422.328	382.724	461.021	633.094	658.795	673.795	520.174	750.361	679.043	604.513	675.581	766.702	591.176	817.425	638.332	0.00184297	0.0452953
Os03g0741100	211.557	70.1706	66.4602	102.68	85.1454	54.7145	60.4934	80.1237	154.778	1146.55	80.7285	173.606	836.577	118.146	182.548	1469.39	82.9717	63.8332	0.00185592	0.0455642
Os10g0340800	12593.6	1101.9	1072.03	975.016	1075.93	1098.34	872.982	1309.8	843.402	1150.48	1165.39	1113.06	1209.98	1507.97	1025.49	999.302	1368.52	1004.21	0.00185817	0.0455756
Os03g0188100	85.3439	97.5811	11.5583	114.288	27.5217	90.1776	31.2897	26.7079	12.9754	141.597	24.8395	36.2596	72.5797	251.329	40.8049	39.8866	6.14605	10.8984	0.00186662	0.0457393
Os02g0834700	1298.19	1963.68	2155.62	1263.41	1906.74	1382.05	1505.03	1655.89	1993.58	1370.74	1975.78	1747.05	1181.33	1890.34	1834.07	1354.01	1773.14	1459.6	0.00186902	0.0457544
Os09g0536400	357.002	427.602	379.498	292.862	338.001	308.023	255.532	330.51	314.19	192.73	199.751	179.1	181.449	257.773	236.239	166.669	185.406	163.475	0.00187889	0.0459522
Os10g0347800	63.7074	41.6638	56.8283	100.894	123.848	62.8204	90.74	125.75	136.242	59.9822	55.8889	41.7534	47.7498	42.9622	21.4762	73.3629	80.9231	84.8515	0.00188877	0.04615
Os05g0562200	3844.08	2827.66	2258.69	2681.29	2035.75	1963.64	1938.92	2015.33	2021.38	3058.11	2445.66	2545.86	2371.26	2573.44	2333.39	2800.61	2480.96	2254.4	0.00189185	0.0461812
Os01g0873100	260.84	71.2671	50.086	32.1434	43.0027	33.4367	33.3756	43.4003	26.8776	53.099	26.9095	40.6547	25.7849	44.0363	36.5096	39.8866	24.5842	30.3597	0.00190358	0.0464234
Os08g0457300	0	2.19283	0.963192	8.92871	0	4.05293	0	0	0	41.2992	5.1749	12.0865	24.8299	2.14811	20.4024	34.9008	2.04868	3.89227	0.00190658	0.0464524
Os10g0329400	0	335.503	5.77915	58.9295	6.88044	7.09262	6.25793	2.22566	3.70726	54.0824	21.7346	15.3828	20.0549	9.66651	2.14762	8.54713	8.19474	1.55691	0.00190972	0.0464849
Os12g0561900	1747.75	927.568	1162.57	1557.17	1698.61	1629.28	1829.4	2281.3	2342.99	1290.11	1839.16	1286.66	1427.72	1151.39	580.933	2069.12	2722.7	2055.12	0.00193274	0.0470008
Os01g0739300	1234.48	155.691	124.252	158.931	94.606	148.945	133.503	148.006	81.5597	180.93	191.471	215.36	163.304	148.22	159.998	170.943	190.528	126.888	0.00194585	0.0472038
Os10g0348900	133.425	54.8208	21.1902	112.502	34.4022	56.741	21.9028	22.2566	22.2436	326.461	208.031	394.46	297.004	296.44	212.615	371.8	164.919	236.65	0.00194323	0.0472038
Os08g0394000	5757.71	884.808	656.897	547.33	702.665	637.323	406.766	682.164	534.772	520.174	598.219	601.03	628.387	865.689	674.354	728.643	1127.8	542.583	0.00194661	0.0472038
Os01g0194600	1126.3	478.038	218.645	220.539	274.357	193.527	160.62	273.756	183.509	136.681	72.4486	82.4081	94.5446	68.7396	99.8646	89.0326	49.1684	70.0609	0.0019557	0.0473796
Os11g0145000	7.21216	37.2782	4.81596	45.5364	16.341	12.1588	8.34391	15.5796	12.9754	19.6663	0	15.3828	76.3997	80.5542	17.181	2.84904	4.09737	1.55691	0.00195776	0.0473848
Os02g0769800	149.051	91.0026	59.7179	108.93	71.3845	84.0983	44.8485	61.2056	45.4139	246.812	135.582	159.322	154.709	119.22	151.408	237.183	114.726	129.223	0.00196492	0.0475133
Os03g0197175	16.8284	14.2534	31.7853	65.1796	23.2215	22.2911	10.4299	10.0155	3.70726	104.231	28.9795	35.1608	63.0297	22.5552	51.543	29.2027	29.7059	7.00609	0.00197359	0.0476781
Os11g0451700	307.719	8.77133	43.3436	1216.09	0	38.5028	0	0	0	836.801	4.13992	0	1.90999	0	0	0	0	1.55691	0.00199877	0.048241
Os01g0159250	25.2426	14.2534	112.693	50.8937	89.4457	132.733	186.695	164.699	177.022	33.4327	87.9733	73.6179	167.124	146.072	111.676	107.551	166.968	173.595	0.00201126	0.0484968
Os10g0339532	50.4851	9.86775	2.88958	16.0717	7.74049	6.07939	6.25793	13.354	0.926815	18.683	2.06996	0	18.1449	6.44434	4.29525	3.5613	4.09737	1.55691	0.00202942	0.0488787
Os06g0239100	31.2527	29.6032	9.63192	6.2501	15.481	8.10586	10.4299	11.1283	3.70726	198.63	41.3992	71.4203	160.439	68.7396	63.3549	118.235	38.925	15.5691	0.0020309	0.0488787
Os04g0543500	853.439	188.584	180.117	221.432	159.11	157.051	152.276	233.694	198.338	358.91	210.101	180.199	297.004	253.477	207.246	392.456	219.209	207.847	0.00203306	0.0488849
Os02g0771600	1010.9	1146.85	806.192	991.087	884.996	763.977	453.7	709.985	661.746	1123.93	1241.98	1756.94	802.197	782.987	935.291	878.93	1103.22	934.924	0.00203876	0.048976
Os02g0173200	709.196	278.49	157	306.255	168.571	145.905	150.19	186.955	148.29	773.869	160.422	543.893	337.114	181.515	352.21	376.074	250.964	222.638	0.00204807	0.0491538
Os09g0527900	3116.86	3292.54	2190.3	2558.08	2816.68	2283.82	2166.29	2318.02	2247.53	2807.37	2244.87	1861.32	2640.56	2513.29	2317.29	1915.98	2192.09	1589.6	0.00205621	0.0493029
Os06g0693100	709.196	751.045	653.044	768.762	614.079	750.805	493.334	484.081	445.798	1571.34	940.797	1086.69	1197.57	1059.02	725.897	1079.07	791.817	867.198	0.00206131	0.0493792
Os01g0355800	700.782	66.8814	95.356	39.2863	46.443	72.9527	39.6336	68.9954	48.1944	35.3994	10.3498	30.7657	36.2899	19.333	24.6977	23.5046	39.9494	29.5813	0.00208908	0.0497167
Os01g0803300	110.586	207.223	133.884	86.6085	184.912	97.2703	65.7083	172.489	97.3156	223.213	206.996	280.188	138.474	297.514	266.305	136.042	209.99	194.614	0.00208186	0.0497167
Os11g0125900	192.324	302.611	104.025	83.037	139.329	87.1379	156.448	104.606	74.1452	54.0824	83.8334	39.5559	134.654	71.9618	70.8716	59.8299	51.2171	51.378	0.00209458	0.0497167
Os02g0589000	176.698	351.95	1096.11	231.254	488.511	649.482	1098.27	1001.55	1082.52	267.462	926.307	658.166	359.079	546.695	733.414	513.54	863.521	565.158	0.00207755	0.0497167
Os04g0353600	1149.14	1206.06	2019.81	1825.03	1063.03	2343.61	2624.16	2506.09	2545.96	2187.88	2565.72	3471.03	2546.02	1596.05	1822.26	2517.13	1387.98	2469.26	0.00209476	0.0497167
Os05g0324700	36.0608	0	0	18.7503	5.16033	6.07939	0	0	1.85363	157.33	47.6091	149.433	130.834	49.4066	153.555	135.33	67.6066	49.8211	0.00208792	0.0497167
Os07g0660100	6173.61	988.968	936.223	825.013	811.032	634.283	657.083	1013.79	792.427	701.104	509.21	590.042	636.982	736.803	755.964	554.851	663.774	474.857	0.00208668	0.0497167
Os08g0517900	209.153	99.7739	102.098	115.18	78.265	121.588	119.944	57.8671	77.8525	133.731	95.2182	71.4203	147.069	53.7028	76.2407	107.551	90.1421	110.541	0.00208781	0.0497167
Os08g0530000	608.226	528.473	345.786	548.223	389.605	361.724	313.94	260.402	331.8	679.471	456.426	473.572	450.758	451.104	466.035	608.983	517.293	459.288	0.00208139	0.0497167
Os09g0570400	4124.15	4001.92	3932.71	2904.51	3368.83	2852.25	2999.64	2949	3425.51	1926.31	2328.71	2279.96	2156.38	2618.55	2352.72	1923.1	2163.41	1820.8	0.00209447	0.0497167
Os02g0513100	57.6973	14.2534	111.73	76.7869	17.2011	137.8	41.7196	101.267	99.1692	138.647	6.20988	0	3.81998	15.0368	2.14762	0	0	0	0.0021031	0.0498684
Os01g0111100	1472.48	1549.24	1779.02	1069.66	1507.68	1372.93	1390.3	1976.39	1905.53	1048.21	1673.56	1458.07	1127.85	1534.83	1550.59	1371.81	1869.42	1223.73	0.00211028	0.0499927

## Sheet: Pathogen infection
	Mock-treated									Infected
Gene ID	-Fe #1	-Fe #2	-Fe #3	suf #1	suf #2	suf #3	+Fe #1	+Fe #2	+Fe #3	-Fe #1	-Fe #2	-Fe #3	suf #1	suf #2	suf #3	+Fe #1	+Fe #2	+Fe #3	P	adjusted P
Os08g0231400	955.611	635.922	496.044	477.686	315.64	345.512	617.449	309.367	518.09	11777.2	11216.1	16657.4	9726.64	6960.96	16245.7	13062.1	10716.7	11788.9	8.92576e-112	2.29213e-107
Os07g0617000	680.347	456.109	390.093	351.791	337.141	419.478	438.055	402.844	481.944	3756.27	2942.45	3687.49	2670.17	3322.06	3239.69	3641.08	3566.76	3283.52	5.06199e-108	6.49959e-104
Os06g0306300	176.698	144.727	145.442	101.787	147.069	140.839	190.867	143.555	278.971	1889.93	2123.78	3350.16	1740	1937.6	3434.05	2952.32	3749.09	2830.46	9.8979e-102	8.4726e-98
Os01g0192900	0	12.0606	1.92638	8.92871	1.72011	8.10586	2.08598	0	5.56089	607.689	1469.67	1566.85	821.297	1431.72	2009.1	1089.05	2502.47	2523.75	5.16546e-99	3.31623e-95
Os01g0141000	354.598	249.983	131.957	196.432	147.929	146.919	372.347	163.586	278.045	5619.65	3500.3	5718.02	4287.93	4596.96	6038.05	6178.86	5590.86	5770.68	1.41952e-98	7.29063e-95
Os07g0537500	144.243	59.2065	70.313	128.573	63.644	121.588	118.901	72.3339	115.852	1219.31	624.093	992.193	946.401	850.653	782.809	1500.02	885.032	921.69	5.59333e-95	2.39395e-91
Os08g0203400	12.0203	14.2534	26.0062	8.03584	1.72011	3.0397	28.1607	6.67698	32.4385	1082.63	1318.57	1528.4	846.127	615.434	1733.13	1387.48	1647.14	1475.95	3.83186e-91	1.40574e-87
Os07g0537600	70.9196	40.5674	60.6811	129.466	48.1631	70.9262	85.5251	45.626	67.6575	724.703	397.432	617.511	543.393	437.141	492.88	864.685	511.147	453.839	4.21926e-90	1.35438e-86
Os10g0409400	4.80811	0	0	6.2501	1.72011	4.05293	0	0	0	1305.84	1079.48	3820.44	1113.53	999.946	2454.74	2054.87	2249.46	2616.38	5.37764e-85	1.53442e-81
Os04g0688100	418.305	182.005	172.411	301.791	178.031	247.229	457.872	241.484	238.191	6163.42	5586.82	10460.3	5627.79	5168.36	9471.03	6866.19	7973.48	7912.21	8.5909e-81	2.20614e-77
Os03g0297600	919.551	532.858	466.185	433.043	513.453	582.608	616.406	499.66	489.358	4367.89	4146.13	5063.15	3723.53	3909.56	5072.69	4708.76	4998.79	4687.07	1.04034e-79	2.42871e-76
Os10g0370500	367.82	233.537	312.074	443.757	389.605	341.459	319.155	371.685	487.505	2168.21	2262.47	2772.21	1475.47	1804.41	2284	1990.06	2442.03	2704.35	2.8207e-77	6.0363e-74
Os05g0177500	1964.11	1760.84	1500.65	895.55	1192.9	961.557	801.016	1917.41	1559.83	80.6319	33.1194	37.3583	80.2197	126.739	79.4621	41.3111	61.4605	38.1443	5.24361e-75	1.03582e-71
Os03g0790700	51.6872	59.2065	20.227	39.2863	30.962	22.2911	16.6878	8.90264	10.195	451.342	641.688	903.193	490.868	1048.28	995.424	788.473	1085.8	921.69	7.52751e-63	1.38076e-59
Os05g0181700	55.2932	4.38567	15.4111	16.0717	5.16033	4.05293	6.25793	0	7.41452	393.326	49.6791	91.1983	303.689	51.5547	92.3479	276.357	34.8276	66.1686	4.4028e-61	7.5376e-58
Os04g0616500	207.951	198.451	152.184	209.825	232.215	180.355	175.222	119.073	162.193	1019.7	793.83	1454.78	844.217	1077.28	1468.98	1360.42	1326.52	1365.41	1.3244e-56	2.12566e-53
Os08g0465700	676.741	646.886	657.86	656.261	731.907	564.37	521.494	702.195	604.283	1782.75	1527.63	2050.31	1889.94	2163.15	2079.97	1902.45	2360.09	1909.55	1.26495e-54	1.91082e-51
Os04g0489600	92.5561	127.184	129.068	233.039	104.067	118.548	197.125	115.734	164.046	1179	1151.93	2448.07	1072.46	1288.87	2154.07	2341.91	1724.99	2297.22	2.30067e-54	3.2823e-51
Os01g0326100	0	3.28925	4.81596	8.92871	5.16033	2.02646	1.04299	1.11283	0.926815	96.3649	146.967	330.731	125.104	93.4429	316.775	243.593	218.185	302.04	6.08242e-53	8.22087e-50
Os11g0250400	0	4.38567	1.92638	2.67861	0	2.02646	2.08598	2.22566	0	123.898	125.233	138.446	143.249	75.1839	120.267	93.3062	55.3145	49.0426	1.30995e-50	1.68197e-47
Os06g0678500	546.922	486.809	235.982	317.862	264.037	196.567	203.383	363.895	265.996	31.4661	24.8395	16.4816	13.3699	21.4811	28.9929	20.6556	36.8763	17.126	2.13009e-49	2.6048e-46
Os09g0400400	48.0811	19.7355	19.2638	15.1788	18.9212	32.4234	35.4616	22.2566	10.195	426.759	416.062	676.845	473.678	332.957	565.899	542.03	486.563	375.993	4.69359e-49	5.4787e-46
Os05g0166300	7.21216	15.3498	1.92638	3.57149	6.88044	4.05293	18.7738	11.1283	24.0972	184.863	280.48	436.213	173.809	185.812	321.07	262.112	262.232	255.333	5.70535e-49	6.37015e-46
Os06g0554600	337.77	494.484	379.498	249.111	438.628	269.52	369.218	618.733	331.8	78.6652	91.0783	102.186	103.14	139.627	147.112	61.2544	110.629	86.4084	1.11905e-48	1.19738e-45
Os04g0611400	61.3034	48.2423	78.0185	42.8578	102.347	48.6351	54.2354	44.5132	62.0966	1010.85	657.213	1017.47	677.092	467.214	1174.75	756.421	796.938	635.997	1.1872e-48	1.21949e-45
Os05g0149300	141.839	153.498	115.583	147.324	165.13	106.389	127.245	129.088	158.485	663.738	922.168	1260.29	655.127	554.213	860.124	783.487	1200.53	871.869	5.7686e-48	5.6976e-45
Os07g0251200	26.4446	28.5068	24.0798	13.3931	13.7609	3.0397	9.3869	11.1283	10.195	353.01	191.471	242.829	196.729	147.146	263.084	295.588	249.94	139.343	5.73032e-47	5.45017e-44
Os12g0231000	1057.78	1527.31	1170.28	1214.31	1429.41	838.956	842.735	1122.84	942.571	195.68	142.827	79.1118	257.849	278.181	120.267	173.792	137.262	160.362	9.92827e-47	9.10564e-44
Os01g0827800	0	0	0	0	3.44022	4.05293	0	0	0	33.4327	55.8889	162.619	16.2349	62.2953	141.743	81.1977	96.2882	154.134	7.14071e-45	6.32322e-42
Os07g0542600	4.80811	6.5785	19.2638	12.5002	17.2011	5.06616	30.2467	13.354	15.7559	383.493	191.471	523.017	276.949	195.478	513.282	361.828	358.52	404.796	2.28816e-44	1.95866e-41
Os01g0326300	21.6365	12.0606	1.92638	36.6077	6.02038	10.1323	15.6448	8.90264	5.56089	695.204	1205.75	2078.88	1098.25	1082.65	2263.6	1698.74	1772.11	2028.65	5.18611e-44	4.29611e-41
Os11g0226933	139.435	63.5922	60.6811	25.0004	64.5041	29.3837	31.2897	45.626	32.4385	1768	873.523	2020.65	1055.27	574.62	1676.22	1347.6	994.637	1021.33	8.34733e-44	6.69873e-41
Os02g0695800	376.234	298.225	257.172	472.329	392.185	332.34	304.553	285.997	347.556	1094.43	999.791	1273.48	1062.91	842.06	920.257	988.618	810.255	1096.06	3.29179e-43	2.56161e-40
Os01g0268600	225.981	103.063	79.9449	209.825	155.67	115.508	148.104	75.6724	115.852	839.751	375.698	588.943	644.622	520.917	458.518	1083.35	509.098	503.66	3.52546e-43	2.66276e-40
Os08g0249900	206.749	259.851	319.78	262.504	338.862	267.493	276.392	387.265	363.312	22.6163	28.9795	41.7534	24.8299	52.6288	86.9788	46.2969	90.1421	59.941	5.02227e-43	3.68491e-40
Os03g0233000	7.21216	9.86775	1.92638	8.92871	10.3207	6.07939	18.7738	35.6105	14.829	74.732	175.947	105.482	104.095	266.366	268.453	105.415	213.063	182.158	6.73073e-43	4.80126e-40
Os04g0316200	26.4446	48.2423	17.3375	21.4289	13.7609	24.3176	8.34391	2.22566	17.6095	492.641	337.404	1326.22	302.734	224.478	836.5	258.551	324.717	523.121	1.21228e-41	8.4139e-39
Os02g0712700	259.638	164.462	132.92	197.325	102.347	87.1379	114.729	74.5596	69.5111	1013.8	314.634	501.041	786.917	247.033	295.298	616.818	195.649	242.099	1.58169e-41	1.06889e-38
Os03g0796600	2186.49	3099.57	3337.46	1635.74	2677.35	2493.56	2706.56	3212.74	2966.74	993.149	1606.29	1267.99	1037.13	1541.27	1583.87	917.392	1397.2	1456.49	1.71333e-41	1.12816e-38
Os01g0963000	193.526	211.608	52.0124	77.6798	38.7025	41.5425	54.2354	44.5132	51.9016	2724.77	1180.91	4593.98	1976.84	1477.9	4413.37	1948.03	2508.61	3000.16	1.49727e-40	9.6125e-38
Os12g0263600	324.547	509.834	585.621	462.507	602.038	511.682	473.517	462.937	513.456	133.731	216.311	187.89	139.429	160.034	175.031	121.797	182.333	137.008	2.61219e-40	1.63612e-37
Os04g0127100	0	0	0	0	0	0	1.04299	0	0	102.265	86.9384	219.755	22.9199	16.1108	113.824	20.6556	48.1441	80.1808	3.29501e-40	2.01466e-37
Os01g0975900	1563.84	8993.9	4826.55	3959.89	5619.6	2570.57	3740.16	4578.18	4571.05	293.028	516.455	235.138	219.649	355.513	359.727	242.169	498.855	117.547	3.84208e-40	2.29452e-37
Os03g0242300	1153.95	896.869	357.344	585.724	616.659	431.637	403.637	603.154	446.725	107.181	67.2737	56.0375	46.7948	70.8877	73.0192	58.4054	46.0954	59.1625	5.77062e-40	3.36794e-37
Os04g0688500	139.435	185.294	32.7485	60.7153	45.5829	28.3705	52.1494	53.4158	29.6581	2302.92	2065.82	4736.82	2079.03	1722.79	7300.85	5482.27	7334.29	6020.57	8.72292e-40	4.97788e-37
Os09g0319800	0	0	0	0	0	0	0	0	0	48.1825	41.3992	261.508	17.1899	17.1849	169.662	76.2119	211.015	231.979	2.36896e-39	1.3225e-36
Os06g0707800	266.85	328.925	302.442	369.649	417.127	446.835	389.035	242.597	422.628	1317.64	900.433	1316.33	1119.26	1045.06	1123.21	1876.09	1179.02	1360.74	4.84994e-39	2.64992e-36
Os08g0508800	152.657	77.8456	17.3375	44.6436	66.2242	32.4234	43.8055	35.6105	24.0972	3359.01	1290.62	5405.97	1845.05	1444.61	4536.86	5812.76	4187.51	5115.22	1.06712e-38	5.70909e-36
Os01g0952500	1292.18	1936.27	1874.37	1478.6	1628.94	1521.87	1646.88	1777.19	1810.07	575.24	787.62	579.054	574.908	860.319	765.628	488.611	857.375	695.16	5.43703e-38	2.84945e-35
Os09g0399800	12.0203	2.19283	0	0	1.72011	2.02646	3.12897	2.22566	0.926815	239.929	259.78	672.45	278.859	205.145	526.168	413.823	562.364	269.345	2.31943e-37	1.19126e-34
Os03g0739700	45.677	32.8925	30.8221	16.9646	27.5217	40.5293	52.1494	32.2721	37.9994	338.261	200.786	402.151	157.574	152.516	387.646	340.461	282.719	327.729	5.0858e-37	2.56085e-34
Os07g0687900	649.095	649.079	489.301	723.226	642.461	453.928	527.752	291.561	405.945	121.931	125.233	131.853	167.124	173.997	109.529	183.051	151.603	168.925	1.95789e-36	9.66894e-34
Os09g0412700	787.328	957.172	870.725	781.263	952.081	466.087	609.106	870.233	696.038	203.546	212.171	158.224	103.14	161.108	223.353	121.084	108.58	108.205	2.30128e-36	1.11504e-33
Os07g0561800	48.0811	39.471	21.1902	24.1075	32.6821	22.2911	27.1177	34.4977	10.195	245.829	181.122	258.212	175.719	262.07	179.327	324.079	235.599	306.711	2.51248e-36	1.19482e-33
Os04g0469000	1318.62	268.622	191.675	465.186	173.731	274.586	192.953	232.581	275.264	11347.5	2267.64	6113.58	7983.77	1712.05	4986.78	9708.83	2359.06	2178.89	5.83073e-36	2.72242e-33
Os01g0813800	723.62	549.305	383.35	493.758	463.569	437.716	347.315	385.039	383.701	1517.26	1585.59	2058	1260.59	1656.19	1749.24	1605.44	1789.53	1598.17	1.07469e-35	4.92821e-33
Os08g0109300	4338.12	3979.99	4981.63	3541.13	4358.76	3525.03	3712	5074.5	5121.58	1632.3	1275.1	1178.99	1632.09	1619.68	1359.45	1174.52	1371.59	844.623	1.56292e-35	7.04137e-33
Os02g0563000	58.8993	177.619	107.877	50.0008	50.7432	80.0453	65.7083	119.073	92.6815	0	0	0	3.81998	2.14811	2.14762	2.84904	0	5.44918	2.92326e-35	1.2943e-32
Os03g0150600	883.49	267.526	489.301	473.222	424.867	390.094	359.831	375.024	476.383	6047.39	1959.22	3221.61	3991.88	1426.35	3064.66	5790.68	1897.08	1891.64	3.99159e-35	1.73736e-32
Os07g0538700	45.677	32.8925	33.7117	42.8578	25.8016	34.4499	20.8598	15.5796	24.0972	142.581	131.443	232.94	96.4546	124.591	144.965	211.541	122.921	201.62	4.44304e-35	1.90162e-32
Os04g0684900	121.405	17.5427	20.227	21.4289	6.88044	8.10586	27.1177	33.3849	72.2916	1092.46	187.331	343.916	902.471	166.479	233.017	1971.54	215.112	280.244	4.59261e-35	1.93341e-32
Os03g0757200	1161.16	2132.53	2234.61	1364.31	2219.8	1264.51	1302.69	2395.92	2404.16	94.3983	120.058	25.2718	66.8497	122.442	42.9525	53.4196	118.824	9.34145	1.58455e-34	6.56312e-32
Os05g0397300	1025.33	689.646	510.492	911.622	669.123	641.376	434.926	413.973	425.408	2017.76	1596.97	1605.31	2265.25	1756.08	1436.76	2951.61	1428.96	1205.05	3.16965e-34	1.29201e-31
Os03g0194900	1101.06	894.676	654.007	1019.66	632.14	569.436	560.085	377.249	510.675	3801.5	1580.42	2788.69	2468.66	1599.27	2354.87	2656.02	1921.67	1750.74	3.82826e-34	1.53609e-31
Os11g0618700	225.981	206.126	209.013	291.076	170.291	215.818	268.048	169.15	213.167	925.3	539.225	1125.15	721.977	799.098	1144.68	708.699	797.963	1010.43	1.51613e-33	5.9899e-31
Os02g0527600	342.578	928.665	812.934	1058.95	749.108	906.843	748.866	603.154	881.401	3205.61	2786.17	4720.34	2918.47	4301.6	4793.5	4227.27	4141.42	5050.61	1.5597e-33	6.06866e-31
Os01g0953500	1085.43	1136.98	1010.39	805.37	921.119	856.181	675.857	1126.18	831.353	391.36	308.424	237.335	441.208	361.957	321.07	259.263	297.059	208.626	5.08232e-33	1.94797e-30
Os05g0553400	210.355	74.5563	98.2456	116.073	106.647	119.561	99.084	104.606	145.51	618.505	449.181	672.45	512.833	387.734	648.583	565.535	364.666	477.971	8.8675e-33	3.34878e-30
Os11g0256900	252.426	574.522	159.89	541.973	313.92	119.561	282.65	170.263	122.34	4329.54	4716.41	6916.79	3451.36	4924.55	6458.98	5625.44	5038.74	6824.71	2.84994e-32	1.06067e-29
Os03g0107800	1898	2169.81	1986.1	1606.28	1764.83	1542.14	1612.46	2004.21	1927.78	1066.9	905.608	1008.68	989.376	1100.91	1055.56	888.901	999.758	839.952	8.33133e-32	3.05641e-29
Os06g0649000	40.8689	4.38567	1.92638	10.7145	0	5.06616	4.17196	2.22566	7.41452	642.105	93.1482	353.805	348.574	35.4439	236.239	443.738	131.116	108.984	2.07448e-31	7.50318e-29
Os04g0405900	1019.32	846.433	611.627	1058.05	876.396	762.964	806.23	757.837	593.162	2364.87	2078.24	2959	3053.12	3454.16	4333.91	2450.18	3291.21	3341.9	2.10826e-31	7.51947e-29
Os09g0570800	0	2.19283	0	5.35723	1.72011	6.07939	8.34391	11.1283	1.85363	88.4984	211.136	196.681	35.3349	115.998	147.112	107.551	134.189	228.866	2.43526e-31	8.56678e-29
Os08g0452900	346.184	315.768	267.767	208.039	224.474	276.612	233.63	257.064	360.531	1074.76	708.962	913.082	709.562	829.171	1065.22	1163.83	1242.53	948.157	3.25867e-31	1.13085e-28
Os09g0246300	373.83	234.633	147.368	719.654	412.826	541.066	330.628	163.586	293.8	2022.68	2225.21	2795.28	2435.24	2325.33	1721.32	2826.96	809.231	1686.91	5.58165e-31	1.91116e-28
Os09g0481700	877.48	1306.93	976.677	1204.48	1156.77	853.141	933.475	693.293	850.816	2957.81	2348.37	2686.5	2617.64	3039.58	2518.09	2675.25	2877.38	2270.75	5.97679e-31	2.01953e-28
Os12g0136500	2051.86	1158.91	1103.82	3017.01	1711.51	1516.81	1317.3	1013.79	873.987	4036.51	2342.16	2813.96	4349.05	2911.77	2294.74	4800.64	1847.91	2491.05	6.35587e-31	2.11972e-28
Os09g0434500	8512.76	13628.5	12904.8	8564.42	9368.58	10015.8	12459.5	13202.6	14447.2	18222.8	19302.4	26948.5	18160.2	23116.9	30501.6	23439.8	29440.6	28454.8	1.20924e-30	3.98118e-28
Os02g0822900	7.21216	5.48208	3.85277	41.0721	10.3207	14.1852	4.17196	3.33849	3.70726	207.48	47.6091	178.001	104.095	132.109	158.924	164.532	155.7	158.805	1.49002e-30	4.8435e-28
Os08g0260600	50.4851	33.9889	30.8221	57.1438	30.962	18.2382	50.0635	53.4158	33.3653	359.893	258.745	517.523	312.284	266.366	599.187	339.036	324.717	286.471	1.67578e-30	5.37926e-28
Os03g0684400	7834.81	8521.35	5676.09	5680.45	6820.23	4615.27	4526.57	5598.64	5442.26	3170.21	2891.74	2238.2	2841.11	3432.68	2627.62	2445.9	3283.02	2124.4	2.55816e-30	8.11032e-28
Os11g0649700	562.549	149.113	136.773	183.932	120.408	87.1379	98.041	66.7698	87.1206	1338.29	719.311	1081.19	876.686	715.321	1305.76	1136.77	824.596	838.395	3.20668e-30	1.00424e-27
Os01g0580500	213.961	164.462	186.859	115.18	178.031	206.699	263.876	194.745	233.557	634.238	835.229	666.956	434.523	757.21	550.866	682.346	972.101	906.899	5.41665e-30	1.6759e-27
Os07g0677200	518.074	728.02	388.166	904.479	538.394	290.798	553.827	411.747	566.284	4545.87	4386.25	8861.62	4824.64	4319.85	7403.94	3302.75	6571.16	5282.59	5.76073e-30	1.76114e-27
Os09g0339000	75.7277	54.8208	113.657	19.6432	73.9647	40.5293	81.3531	48.9645	80.6329	455.275	521.63	863.637	305.599	416.734	906.298	547.016	577.729	513.78	8.76251e-30	2.64731e-27
Os06g0228200	1800.64	1646.82	2408.94	1881.28	2120.03	1816.72	1866.95	2364.76	2515.38	563.44	747.256	907.588	662.767	743.247	909.519	1002.86	812.304	913.905	9.98632e-30	2.98196e-27
Os08g0190100	0	0	0	0	0	0	0	0	0	55.0657	37.2593	79.1118	29.6049	10.7406	36.5096	51.2828	20.4868	26.4674	1.01828e-29	3.00567e-27
Os02g0608000	542.114	114.027	150.258	158.038	135.889	124.628	107.428	294.9	151.071	4.91658	0	0	3.81998	1.07406	0	1.42452	0	3.11382	1.36891e-29	3.99473e-27
Os02g0562600	12.0203	19.7355	15.4111	25.0004	12.0408	10.1323	15.6448	15.5796	14.829	442.492	105.568	376.88	129.879	83.7764	221.205	230.772	85.0204	171.26	1.65146e-29	4.76512e-27
Os10g0562100	2374	4426.23	2951.22	2412.54	3442.8	2700.26	2243.47	2660.78	2393.96	1383.52	1717.03	1392.15	1564.28	2196.44	1651.52	1037.76	1726.02	1031.45	2.02657e-29	5.78249e-27
Os02g0579800	572.165	333.311	312.074	381.256	325.961	291.811	314.983	381.7	363.312	2111.18	965.637	1395.44	1277.78	945.169	1558.1	1861.85	1147.26	1128.76	2.74398e-29	7.74346e-27
Os01g0816100	61.3034	41.6638	34.6749	44.6436	29.2419	26.344	41.7196	25.5951	57.4625	528.04	106.603	560.375	420.198	177.219	317.848	366.814	146.481	203.177	2.85113e-29	7.95836e-27
Os01g0511000	441.144	190.776	149.295	176.789	139.329	146.919	296.209	331.623	197.412	1010.85	573.379	773.537	1300.7	528.436	658.247	1570.53	775.427	1018.22	3.2012e-29	8.83945e-27
Os02g0603600	363.012	379.36	183.006	194.646	201.253	151.985	175.222	231.469	154.778	960.699	815.565	1228.43	804.107	829.171	1257.43	1065.54	1000.78	1177.8	4.94431e-29	1.35074e-26
Os01g0846300	603.418	480.23	549.019	596.438	473.03	369.83	272.22	448.47	344.775	80.6319	139.722	58.2351	148.024	171.849	175.031	81.91	83.9961	46.7073	5.41668e-29	1.46421e-26
Os03g0232400	562.549	634.825	738.768	591.081	569.356	401.24	544.44	638.764	629.307	177.98	94.1832	90.0995	150.889	78.4061	79.4621	210.117	87.0691	103.534	5.51565e-29	1.47544e-26
Os03g0676400	13.2223	2.19283	5.77915	12.5002	1.72011	4.05293	8.34391	4.45132	3.70726	172.08	42.4342	45.0498	123.194	19.333	40.8049	145.301	18.4382	10.8984	6.61102e-29	1.75022e-26
Os10g0148400	712.802	589.872	850.498	276.79	663.102	640.363	594.504	939.228	862.865	86.5318	228.731	156.026	124.149	191.182	211.541	86.8958	239.696	129.223	8.51904e-29	2.23234e-26
Os08g0482700	4846.57	2037.14	1936.02	2869.69	1867.18	2244.31	2264.33	2535.03	2429.18	13652.4	5212.16	9226.41	10934.7	6731.11	8930.9	15872	8167.08	7391.42	9.00926e-29	2.33695e-26
Os07g0598200	1353.48	1339.82	1010.39	1125.91	1214.4	1036.54	1216.13	1182.94	1280.86	2307.84	2356.65	2497.51	2203.18	2489.66	2508.43	2269.97	2983.91	2441.23	1.03765e-28	2.66467e-26
Os04g0616700	405.083	312.479	288.958	340.184	419.707	211.765	318.112	203.648	292.874	1789.63	1252.33	2026.14	1189.93	931.207	1991.92	1730.79	1463.79	1387.21	1.09716e-28	2.78961e-26
Os12g0547600	191.122	122.799	116.546	185.717	121.268	77.0056	128.288	73.4467	158.485	1665.74	393.293	1230.63	1146	398.475	933.143	1483.64	588.997	487.312	1.53416e-28	3.86248e-26
Os01g0841700	26.4446	14.2534	17.3375	17.8574	6.88044	8.10586	25.0317	2.22566	12.9754	571.306	42.4342	123.063	272.174	19.333	82.6836	330.489	20.4868	38.1443	1.58892e-28	3.9615e-26
Os03g0843800	734.438	865.073	2148.88	936.622	1648.72	1183.45	1757.44	3066.96	2646.06	80.6319	84.8684	19.7779	82.1297	30.0736	47.2477	121.084	277.597	138.565	1.99736e-28	4.93195e-26
Os04g0565500	709.196	172.137	278.362	479.472	234.795	206.699	219.028	225.904	263.215	1729.65	895.258	1524	1505.07	939.799	1565.62	2372.54	1192.33	1273.55	2.49421e-28	6.10012e-26
Os01g0136700	9.61622	12.0606	2.88958	6.2501	1.72011	9.11909	4.17196	2.22566	1.85363	154.381	45.5391	154.927	68.7597	47.2585	96.6431	116.811	63.5092	85.63	2.86139e-28	6.86733e-26
Os05g0136200	234.395	197.355	140.626	216.075	208.133	172.249	176.265	161.36	147.364	737.487	381.908	571.363	535.753	500.51	587.375	572.658	550.072	462.402	2.85159e-28	6.86733e-26
Os05g0525900	414.699	123.895	143.516	242.861	103.207	170.223	248.231	140.217	190.924	724.703	534.05	544.992	995.106	697.062	473.551	1039.9	652.506	873.426	3.862e-28	9.18299e-26
Os07g0412100	7803.56	14388.3	12670.8	7679.59	10133.2	7835.32	11325.8	12197.7	15928.2	3016.81	4546.67	3672.1	2780.95	4235	5142.49	4094.79	6418.53	4305.63	8.56953e-28	2.01895e-25
Os05g0473000	0	0	0	0	0	0	0	0	0	32.4494	28.9795	36.2596	15.2799	22.5552	55.8382	26.3536	27.6572	46.7073	1.14909e-27	2.6826e-25
Os08g0351200	189.92	205.03	420.915	261.611	325.101	264.454	461.001	291.561	355.897	924.317	1543.16	1889.89	824.162	1693.79	2410.71	1400.3	1951.37	1771.76	2.95805e-27	6.84348e-25
Os01g0191200	11025	9425.89	7131.47	6202.78	7752.53	6843.37	4557.86	7931.14	5339.38	3127.93	3585.17	2236.01	3965.14	3960.05	2733.93	2277.81	3005.42	1806.79	3.99949e-27	9.17025e-25
Os10g0159800	1714.09	2060.17	2415.69	1495.56	1842.24	1594.83	1665.65	1839.51	1896.26	847.618	1018.42	720.796	797.422	923.688	828.983	794.171	843.034	610.308	4.12029e-27	9.36363e-25
Os02g0606800	245.214	252.176	159.89	253.576	186.632	183.395	128.288	155.796	179.802	824.018	549.575	953.736	555.808	485.473	808.581	804.855	702.699	723.184	5.14864e-27	1.1598e-24
Os02g0194700	9266.43	31886	24890.8	15157.4	24350.7	17553.2	16914.2	23592	26425.4	1502.51	2519.14	732.883	1469.74	3675.42	2040.24	2272.82	2097.85	491.983	7.1731e-27	1.60178e-24
Os09g0272000	1748.95	3010.76	1352.32	1510.74	1500.8	953.451	878.197	1391.04	1117.74	473.958	199.751	164.816	165.214	242.737	202.951	106.839	281.694	129.223	8.32303e-27	1.84255e-24
Os06g0228500	206.749	460.495	333.264	236.611	242.535	244.189	244.059	370.572	278.971	62.9322	55.8889	54.9387	21.0099	79.4802	76.2407	51.995	63.5092	48.2642	8.54316e-27	1.87512e-24
Os04g0365100	0	0	3.85277	1.78574	0	4.05293	2.08598	0	1.85363	68.8321	60.0289	98.8897	66.8497	27.9255	95.5693	44.1602	53.2658	33.4735	1.03843e-26	2.2599e-24
Os11g0614500	198.334	203.933	238.872	188.396	169.431	319.168	262.833	212.55	237.265	491.658	1066.03	1068.01	683.777	979.539	911.667	683.058	1014.1	786.239	1.05759e-26	2.28225e-24
Os06g0206900	390.659	330.021	279.326	339.291	247.696	204.673	185.652	313.818	209.46	61.9489	66.2387	59.3338	63.0297	70.8877	96.6431	59.8299	87.0691	68.504	1.17905e-26	2.52316e-24
Os10g0511200	0	2.19283	1.92638	0	0	0	0	6.67698	0	24.5829	51.749	95.5934	24.8299	63.3693	65.5026	27.7782	43.0224	84.0731	1.20893e-26	2.56573e-24
Os10g0370400	57.6973	92.099	73.2026	83.037	93.746	118.548	82.3961	65.6569	103.803	208.463	215.276	293.373	209.144	195.478	274.896	186.612	204.868	212.518	2.1535e-26	4.53293e-24
Os03g0183000	429.124	198.451	115.583	469.65	139.329	163.13	225.286	220.34	170.534	1685.4	921.133	2003.07	1634	1345.79	1807.23	1775.67	1425.88	1745.29	4.89672e-26	1.02234e-23
Os09g0425200	73.3236	149.113	26.9694	112.502	36.1223	74.9792	33.3756	37.8362	27.8045	0	0	0	0	0	0	0	0	0	5.19747e-26	1.07638e-23
Os03g0187800	0	0	0	0	0	0	0	0	0	92.4317	16.5597	43.951	37.2448	21.4811	50.4692	27.0659	10.2434	14.0122	9.31194e-26	1.91304e-23
Os09g0356800	0	32.8925	25.043	8.92871	13.7609	4.05293	45.8915	35.6105	98.2424	357.927	615.813	588.943	294.139	233.07	511.135	576.219	518.317	585.398	1.00683e-25	2.05202e-23
Os01g0870400	19.2324	38.3746	44.3068	31.2505	44.7228	29.3837	15.6448	31.1592	29.6581	0	0	0	1.90999	0	0	0	0	0	1.11437e-25	2.2533e-23
Os06g0618700	409.891	299.322	344.823	259.826	264.037	268.506	328.542	267.079	296.581	652.921	913.888	1115.26	578.728	777.617	1074.89	850.439	1010	1026	1.29609e-25	2.60028e-23
Os04g0412500	2413.67	1821.15	1360.99	1507.17	1378.67	954.464	968.937	1340.96	1005.59	393.326	520.595	383.472	526.203	763.654	696.904	398.866	531.634	411.024	1.3391e-25	2.66575e-23
Os05g0311500	3401.74	1882.55	1248.3	1266.09	1381.25	1061.87	961.636	1600.25	1056.57	353.994	187.331	195.582	223.469	245.959	353.284	202.282	314.473	142.457	1.35693e-25	2.68046e-23
Os11g0298000	0	0	0	5.35723	0	0	0	0	0	40.3159	176.982	143.939	99.3196	237.366	255.567	66.9525	199.747	122.217	1.37202e-25	2.68959e-23
Os11g0474900	0	0	0	0	0	0	0	0	3.70726	51.1324	37.2593	79.1118	22.9199	16.1108	74.0931	13.533	4.09737	63.8332	1.40839e-25	2.73996e-23
Os12g0576700	19.2324	24.1212	102.098	37.5006	91.1658	64.8468	128.288	115.734	173.314	350.06	433.657	746.068	301.779	322.217	866.567	585.478	522.415	568.272	2.43944e-25	4.71015e-23
Os09g0460500	1646.78	1852.94	1480.43	1117.88	1491.33	999.047	1066.98	1616.94	1531.1	276.312	437.797	283.484	169.034	350.142	435.968	191.598	529.585	175.152	2.50514e-25	4.8009e-23
Os08g0562600	1834.29	1749.88	1831.03	1225.91	1788.91	1369.89	1525.89	1412.18	1644.17	5723.88	3426.82	4612.66	4305.12	3622.79	5170.41	5965.18	4638.22	3974.79	2.72765e-25	5.1886e-23
Os02g0475400	1423.2	4651	4265.98	3473.27	3611.37	2918.11	3251	3449.77	4373.64	684.388	927.342	662.561	626.477	927.985	967.505	584.766	1099.12	559.709	3.09351e-25	5.84127e-23
Os08g0378000	132.223	69.0742	80.9081	123.216	96.3261	56.741	126.202	26.7079	86.1938	668.655	781.41	1151.52	437.388	619.73	1151.13	986.481	857.375	824.383	4.22276e-25	7.91536e-23
Os01g0695300	2543.49	1507.57	1412.04	1956.28	1577.34	1405.35	1561.35	1682.6	1804.51	413.976	432.622	281.286	420.198	502.658	604.556	522.799	588.997	268.567	6.27594e-25	1.16787e-22
Os06g0694200	168.284	770.781	366.976	523.223	356.923	246.215	171.05	254.838	282.679	25.5662	10.3498	0	21.9649	17.1849	19.3286	7.12261	4.09737	3.11382	6.82496e-25	1.2609e-22
Os12g0133100	1044.56	684.164	357.344	484.829	553.875	373.883	292.037	411.747	353.117	153.397	110.743	69.2228	90.7246	99.8872	88.0526	91.1694	150.578	43.5934	9.98954e-25	1.83237e-22
Os11g0541600	27.6466	81.1348	71.2762	66.0725	62.784	54.7145	91.783	51.1902	96.3888	299.911	362.243	520.819	331.384	182.59	500.397	420.946	402.567	465.516	1.01518e-24	1.84892e-22
Os05g0576500	125.011	37.2782	38.5277	47.3222	29.2419	28.3705	18.7738	8.90264	16.6827	264.512	139.722	291.175	182.404	124.591	235.165	221.513	271.451	210.961	1.13854e-24	2.05899e-22
Os04g0556500	14.4243	30.6997	26.9694	41.0721	50.7432	26.344	31.2897	27.8207	35.219	371.693	96.2532	194.483	391.548	292.143	294.225	358.979	163.895	161.918	1.509e-24	2.69353e-22
Os09g0286600	847.429	322.346	640.523	1010.73	654.502	980.809	2125.61	1582.44	2109.43	2127.89	2437.38	4139.08	2866.9	3576.61	3817.4	4389.66	4492.77	5302.05	1.51039e-24	2.69353e-22
Os11g0669100	25.2426	30.6997	24.0798	29.4648	42.1427	12.1588	10.4299	13.354	31.5117	443.475	194.576	416.436	238.749	127.813	278.117	349.72	273.499	191.5	1.57172e-24	2.78358e-22
Os03g0225900	164.678	144.727	61.6443	40.1792	81.7052	63.8336	83.4391	68.9954	52.8285	905.634	727.591	829.575	720.067	239.515	419.861	480.776	270.426	267.01	1.97078e-24	3.46642e-22
Os01g0677900	62.5054	10.9642	13.4847	25.0004	12.0408	12.1588	12.5159	13.354	5.56089	376.61	129.373	334.027	194.819	90.2207	328.587	229.348	144.432	131.559	2.00318e-24	3.49943e-22
Os06g0522300	0	8.77133	5.77915	5.35723	3.44022	0	2.08598	0	9.26815	137.664	84.8684	261.508	119.375	73.0358	188.991	150.999	129.067	137.008	2.39129e-24	4.1492e-22
Os03g0654400	215.163	434.181	448.847	433.043	441.208	466.087	465.173	395.054	479.163	1221.28	1056.71	1218.54	1017.07	1241.61	1572.06	1088.33	1255.84	1068.82	2.7067e-24	4.66497e-22
Os11g0489250	664.721	2930.72	2152.73	2701.83	2353.11	1115.57	1374.66	1598.02	1853.63	270.412	91.0783	134.05	207.234	227.7	286.708	106.127	147.505	94.9714	3.12932e-24	5.34255e-22
Os03g0432100	88.95	151.305	81.8713	273.219	96.3261	167.183	93.869	86.8007	74.1452	570.323	398.467	702.117	581.593	715.321	797.843	574.082	630.995	806.479	3.14145e-24	5.34255e-22
Os09g0491820	1795.83	1740.01	1884	1165.2	1875.78	1096.32	1177.53	1712.64	1714.61	595.889	770.025	435.115	624.567	810.912	579.859	498.582	722.161	397.79	3.25197e-24	5.49411e-22
Os10g0469700	167.082	109.642	131.957	154.467	122.988	66.8733	110.557	58.98	103.803	858.434	333.264	618.61	501.373	266.366	680.797	578.356	361.593	368.987	3.73387e-24	6.26704e-22
Os11g0156600	14.4243	6.5785	1.92638	2.67861	3.44022	6.07939	6.25793	0	0	203.546	105.568	168.113	113.645	34.3698	146.038	103.278	74.777	77.8454	5.16649e-24	8.61529e-22
Os08g0423500	0	0	1.92638	0	0	0	0	0	0	3.93326	110.743	246.125	21.9649	39.7401	127.784	209.405	237.647	223.416	5.9529e-24	9.86261e-22
Os08g0355400	439.942	789.42	717.578	1034.84	608.919	635.296	995.011	465.163	842.475	2630.37	3379.21	4547.83	2255.7	2526.18	4720.48	4126.84	4559.35	4329.76	6.0052e-24	9.88549e-22
Os03g0134300	4015.97	5054.48	5686.69	3786.67	4848.13	4063.06	3741.2	4387.89	4516.37	2338.32	2202.44	1940.44	2227.05	2478.92	2014.47	2272.11	2525	2095.6	6.28318e-24	1.02772e-21
Os11g0278300	27.6466	26.314	25.043	18.7503	29.2419	20.2646	45.8915	31.1592	7.41452	164.214	294.969	474.671	211.054	226.626	528.316	295.588	406.664	417.251	6.5957e-24	1.07201e-21
Os07g0680400	43.273	12.0606	28.8958	31.2505	27.5217	12.1588	34.4186	15.5796	25.9508	363.827	145.932	321.941	141.339	71.9618	236.239	127.495	107.556	150.242	6.81708e-24	1.10102e-21
Os07g0628900	2198.51	3265.13	3177.57	2884.87	3124.58	2422.64	2099.54	2576.2	3175.27	507.391	127.303	82.4081	299.869	300.736	164.293	299.862	165.943	54.4918	8.78387e-24	1.40981e-21
Os01g0898800	979.652	1369.42	730.099	1075.02	1062.17	693.051	609.106	794.56	590.381	481.825	479.196	343.916	373.403	532.732	388.72	331.201	540.853	287.25	9.09908e-24	1.45133e-21
Os07g0539900	134.627	59.2065	15.4111	123.216	57.6237	20.2646	43.8055	24.4822	51.9016	3029.59	1132.27	2839.23	1028.53	299.662	2021.99	1230.79	1428.96	1857.39	9.90819e-24	1.57063e-21
Os04g0559400	288.486	321.25	281.252	305.362	246.836	238.11	239.887	168.037	219.655	574.256	581.659	607.622	489.913	649.804	792.474	677.36	621.776	643.782	1.03002e-23	1.62276e-21
Os07g0529600	218004	72475.3	89574.9	51747.3	64985.7	54873.6	50205.3	93192.8	83941.6	18753.8	11430.3	10088.9	14149.2	21540.2	13730.8	10226.6	14631.7	11423	1.0385e-23	1.62615e-21
Os03g0729000	5443.98	1560.2	1813.69	2180.39	1610.88	1380.02	1585.34	2300.22	1671.97	634.238	126.268	180.199	287.454	297.514	296.372	368.951	309.351	174.374	1.54099e-23	2.39834e-21
Os04g0401700	119.001	289.454	106.914	129.466	108.367	60.7939	151.233	57.8671	88.0474	1415.97	696.542	1838.25	1124.03	881.8	2161.58	1054.86	1127.8	1138.88	2.0398e-23	3.15555e-21
Os07g0491800	2186.49	1001.03	867.836	1039.3	1081.95	1006.14	887.584	1121.73	759.988	301.878	356.033	121.964	329.474	432.845	192.212	189.461	307.303	134.673	2.14398e-23	3.29685e-21
Os02g0128000	153.859	167.752	155.074	127.681	147.069	142.866	149.147	250.387	194.631	23.5996	43.4692	19.7779	25.7849	23.6292	54.7644	16.382	22.5355	44.3719	2.25485e-23	3.4467e-21
Os11g0644600	1466.47	1465.91	1478.5	1075.91	1259.12	1025.39	1340.24	1927.42	1692.36	482.808	596.149	681.24	558.673	719.618	888.043	468.668	818.45	631.326	2.76699e-23	4.20452e-21
Os11g0474800	20.4345	8.77133	3.85277	3.57149	0	2.02646	4.17196	1.11283	5.56089	203.546	103.498	276.891	95.4996	28.9995	274.896	37.7498	44.0467	119.882	3.24813e-23	4.90658e-21
Os02g0683800	9.61622	39.471	23.1166	37.5006	34.4022	34.4499	4.17196	16.6924	17.6095	116.031	109.708	134.05	122.239	151.442	139.596	101.853	147.505	92.6361	3.30385e-23	4.96157e-21
Os01g0138500	393.063	442.952	518.197	487.508	486.791	320.181	381.734	509.676	348.482	112.098	128.338	145.038	157.574	81.6283	118.119	138.179	96.2882	113.654	4.08596e-23	6.10043e-21
Os07g0493800	0	2.19283	4.81596	0	0	6.07939	0	0	0	74.732	26.9095	73.6179	40.1098	23.6292	56.9121	39.1743	17.4138	42.815	4.42759e-23	6.57228e-21
Os09g0478300	897.914	3767.29	3042.72	1397.34	2530.28	1316.19	2052.6	1889.58	3400.48	275.328	239.08	71.4203	128.924	211.589	161.072	188.749	266.329	66.9471	5.64644e-23	8.33336e-21
Os06g0561000	168.284	311.382	200.344	191.074	308.76	205.686	290.994	408.408	332.727	718.804	1063.96	1491.04	959.771	680.952	830.057	892.463	827.669	935.702	6.17924e-23	9.0676e-21
Os07g0150700	320.941	304.804	317.853	332.148	353.482	298.903	255.532	285.997	275.264	1042.31	638.583	1458.07	795.512	722.84	1533.4	1069.1	949.565	1040.01	1.05634e-22	1.5413e-20
Os05g0150733	114.193	223.669	139.663	107.145	141.909	146.919	91.783	179.166	144.583	44.2492	50.714	50.5436	39.1548	78.4061	60.1335	48.4337	77.85	52.1564	1.06765e-22	1.549e-20
Os02g0643500	3269.51	4104.98	3704.44	2638.44	3318.09	2504.71	2714.9	3700.16	3354.14	1844.7	2061.68	1970.1	1846.96	2473.55	2303.33	2074.1	2693	2124.4	1.12517e-22	1.62328e-20
Os04g0688300	91.3541	51.5316	260.062	176.789	200.393	182.382	350.444	287.11	453.213	860.401	1101.22	1914.07	755.402	599.323	690.461	1212.27	948.541	1164.57	1.25555e-22	1.80126e-20
Os05g0548900	985.662	3102.86	6737.53	1625.03	4287.37	3090.36	4176.13	4950.98	8505.38	285.161	807.285	432.917	444.073	1047.2	769.924	609.695	1630.75	776.119	1.32774e-22	1.89424e-20
Os05g0365600	907.53	1487.84	1005.57	858.049	1274.6	843.009	806.23	979.29	901.791	507.391	347.753	296.669	399.188	423.178	410.196	299.862	397.445	235.093	1.3393e-22	1.90018e-20
Os11g0214400	0	2.19283	9.63192	3.57149	1.72011	14.1852	4.17196	0	3.70726	55.0657	53.819	165.915	15.2799	10.7406	49.3954	61.2544	63.5092	81.7377	1.5123e-22	2.13384e-20
Os04g0515900	14.4243	8.77133	13.4847	8.92871	3.44022	0	6.25793	13.354	18.5363	171.097	66.2387	117.569	120.33	38.666	62.2811	151.712	109.605	80.1808	1.55757e-22	2.18571e-20
Os05g0527900	64.9095	32.8925	55.8651	26.7861	41.2826	35.4631	31.2897	68.9954	25.9508	0	0	0	3.81998	2.14811	2.14762	2.84904	2.04868	0	1.68512e-22	2.35185e-20
Os07g0569800	2.40405	0	0.963192	0	0	2.02646	4.17196	0	0	97.3482	23.8045	28.5681	48.7048	27.9255	39.7311	25.6414	11.2678	10.8984	1.74729e-22	2.42543e-20
Os04g0585200	2722.59	4458.03	3861.44	3359.88	3806.6	3086.3	3197.8	3051.38	3825.89	1477.92	1416.89	1252.6	1285.42	1500.46	1758.9	1049.16	1651.24	1016.66	1.94972e-22	2.69187e-20
Os12g0592900	70.9196	6.5785	7.70554	18.7503	0	14.1852	6.25793	0	7.41452	236.979	39.3293	90.0995	212.964	66.5915	73.0192	377.498	72.7283	137.008	2.29521e-22	3.15193e-20
Os01g0713200	200.739	174.33	38.5277	121.431	46.443	30.397	77.1812	68.9954	67.6575	4147.62	1014.28	4879.66	1387.61	434.993	2832.72	1569.11	1673.78	1760.86	2.65182e-22	3.62228e-20
Os03g0235000	79.3338	10.9642	15.4111	21.4289	33.5421	38.5028	19.8168	31.1592	20.3899	509.357	217.346	434.016	315.149	294.291	362.949	433.767	219.209	214.853	2.90071e-22	3.94129e-20
Os11g0229500	0	2.19283	1.92638	1.78574	3.44022	0	0	0	0	27.5328	22.7696	102.186	18.1449	34.3698	109.529	51.2828	50.1928	72.3962	3.10205e-22	4.19266e-20
Os02g0736900	129.819	0	5.77915	2.67861	0	2.02646	6.25793	0	1.85363	139.631	8.27984	10.9877	86.9046	2.14811	10.7381	278.494	4.09737	9.34145	3.24941e-22	4.36884e-20
Os04g0680400	266.85	103.063	269.694	176.789	250.276	286.745	454.743	303.802	314.19	754.203	814.53	1499.83	870.001	885.022	1464.68	1140.33	881.959	1087.5	4.14934e-22	5.54975e-20
Os12g0628100	982.056	1149.04	1168.35	850.907	961.541	621.111	855.251	1131.75	1132.57	330.394	337.404	336.225	285.544	374.846	562.678	279.206	424.078	381.443	5.99562e-22	7.97759e-20
Os02g0654700	96.1622	10.9642	30.8221	37.5006	10.3207	10.1323	31.2897	22.2566	57.4625	553.607	58.9939	325.237	382.953	129.961	188.991	479.351	131.116	105.091	6.80311e-22	9.00535e-20
Os02g0206700	1603.5	2416.5	1243.48	1763.42	1703.77	1362.8	1295.39	1661.45	1247.49	511.324	448.147	273.595	375.313	483.325	508.987	113.249	455.832	168.146	7.36785e-22	9.70289e-20
Os11g0625801	2.40405	0	0	0.892871	1.72011	0	2.08598	11.1283	3.70726	74.732	119.023	75.8154	26.7399	30.0736	74.0931	102.566	75.8013	42.0365	7.65771e-22	1.00332e-19
Os01g0940700	185.112	285.068	80.9081	255.361	147.929	91.1909	125.159	143.555	94.5351	3816.25	3240.52	8294.65	2199.36	701.359	4243.71	1019.25	2521.93	3293.64	8.4769e-22	1.10501e-19
Os09g0350900	12.0203	10.9642	30.8221	3.57149	15.481	16.2117	50.0635	13.354	35.219	59.9822	187.331	250.521	91.6796	137.479	182.548	272.084	329.838	391.562	9.54123e-22	1.23747e-19
Os01g0140700	0	10.9642	5.77915	5.35723	10.3207	16.2117	11.4729	8.90264	18.5363	274.345	110.743	142.841	101.23	78.4061	100.938	266.386	90.1421	175.152	1.34269e-21	1.73268e-19
Os01g0810300	5255.26	5119.17	4135.95	2805.4	3733.5	3233.22	2767.05	5096.76	4008.48	1713.92	1839.16	1682.22	1366.6	2483.22	1831.92	1208.71	2004.64	1031.45	1.48011e-21	1.90046e-19
Os03g0287100	420.709	257.658	174.338	287.505	243.395	140.839	127.245	162.473	100.096	166.18	89.0083	59.3338	110.78	62.2953	55.8382	39.1743	44.0467	31.9166	1.66627e-21	2.12885e-19
Os10g0376900	9.61622	6.5785	1.92638	24.1075	5.16033	13.172	10.4299	2.22566	9.26815	93.415	124.198	220.854	67.8047	121.368	183.622	101.141	120.872	162.697	1.83973e-21	2.33883e-19
Os02g0823100	3577.23	3551.29	1744.34	2944.69	2270.54	1340.51	1172.32	1703.74	1250.27	754.203	172.842	263.706	521.428	397.401	416.639	196.584	353.398	158.026	1.91566e-21	2.42336e-19
Os02g0744900	23383	22363.6	26612	18168.1	24462.5	18542.1	19766.7	31671.1	28469.9	9242.18	13310.9	10129.6	9592.94	13492.3	12726.8	11877.7	14470.9	10280.3	2.09887e-21	2.64211e-19
Os01g0203400	28.8486	17.5427	11.5583	3.57149	8.60055	8.10586	8.34391	11.1283	12.9754	54.0824	55.8889	87.902	45.8398	56.925	84.8312	72.6506	83.9961	88.7438	2.32719e-21	2.91523e-19
Os03g0625300	82.9399	85.5205	38.5277	44.6436	38.7025	28.3705	34.4186	89.0264	27.8045	7.86652	0	1.09877	1.90999	4.29622	2.14762	4.27356	2.04868	0.778454	2.44174e-21	3.04387e-19
Os07g0635700	1046.97	1154.53	1234.81	1883.07	1320.18	1394.21	1339.2	1503.43	1537.59	443.475	440.902	404.349	514.743	614.36	491.806	623.228	661.725	326.172	2.68777e-21	3.33439e-19
Os04g0464100	26.4446	15.3498	9.63192	10.7145	12.0408	12.1588	14.6018	13.354	3.70726	438.559	82.7984	105.482	258.804	42.9622	142.817	321.23	36.8763	70.0609	3.14666e-21	3.88491e-19
Os09g0357400	127.415	15.3498	51.0492	32.1434	37.8424	38.5028	68.8373	6.67698	30.5849	395.293	453.321	820.785	570.133	352.29	951.398	808.416	794.89	579.17	3.20247e-21	3.93491e-19
Os06g0160700	466.386	348.66	988.235	608.045	453.249	589.701	1112.87	1160.68	1515.34	265.495	136.617	153.828	234.929	168.627	187.917	202.994	219.209	196.17	3.23423e-21	3.955e-19
Os09g0554300	652.701	1135.89	702.167	687.511	792.97	638.336	524.623	734.467	654.331	1447.44	1612.5	2094.26	1455.41	2329.63	2517.02	1391.76	1443.3	1443.25	4.51724e-21	5.49776e-19
Os11g0547000	738.045	508.737	823.529	587.509	550.435	551.198	567.386	649.892	825.792	325.477	185.261	150.532	305.599	240.589	202.951	190.886	145.457	164.254	4.69451e-21	5.68656e-19
Os01g0830700	413.497	444.049	330.375	515.187	363.803	412.385	381.734	314.931	412.433	1791.6	755.536	1324.02	1111.62	851.727	1407.77	1521.39	1064.29	935.702	5.26005e-21	6.3417e-19
Os07g0661000	510.861	348.66	376.608	366.97	352.622	317.142	355.659	447.357	509.748	181.913	114.883	83.5069	117.465	168.627	85.905	98.292	102.434	94.9714	6.85071e-21	8.22085e-19
Os08g0482600	60.1013	4.38567	9.63192	35.7149	5.16033	10.1323	2.08598	8.90264	29.6581	1550.69	42.4342	97.7909	763.997	48.3325	103.086	2628.95	91.1665	60.7194	6.9443e-21	8.29441e-19
Os01g0975300	228.385	461.591	211.902	731.262	529.794	237.096	236.758	196.971	140.876	4214.49	1625.95	3566.62	1651.19	1855.97	3517.81	1929.51	1483.25	1929.79	7.08804e-21	8.4269e-19
Os07g0409900	292.093	366.203	442.105	396.435	350.902	422.518	440.141	401.731	435.603	758.136	736.906	859.242	617.882	501.584	745.226	813.402	791.817	811.928	7.12943e-21	8.43704e-19
Os01g0392600	81.7378	31.7961	13.4847	104.466	77.4049	64.8468	55.2784	20.0309	30.5849	245.829	136.617	231.841	317.059	182.59	242.682	348.295	121.897	126.888	7.48139e-21	8.81294e-19
Os04g0423400	10609.1	5501.82	3723.7	3168.8	3691.35	3558.47	3165.47	5050.02	3831.45	1120	1340.3	566.968	1125.94	1330.76	867.64	974.373	1872.5	997.978	8.41355e-21	9.86576e-19
Os06g0218900	0	6.5785	12.5215	8.03584	3.44022	4.05293	7.30092	0	1.85363	158.314	42.4342	138.446	68.7597	52.6288	88.0526	99.7165	63.5092	80.9592	8.59216e-21	1.00294e-18
Os06g0288100	254.83	258.754	246.577	235.718	294.139	227.977	200.254	230.356	310.483	1722.77	781.41	1153.71	1235.76	513.399	1444.28	1375.38	1118.58	846.18	1.52006e-20	1.7663e-18
Os01g0687400	341.376	57.0137	78.9817	34.822	52.4633	54.7145	47.9775	51.1902	48.1944	869.251	543.365	826.278	456.488	273.884	628.18	576.931	480.417	492.762	1.6589e-20	1.91033e-18
Os01g0826400	33.6568	52.628	44.3068	71.4297	29.2419	34.4499	38.5906	8.90264	50.9748	1313.71	121.093	435.115	974.096	86.9986	292.077	1760	160.822	221.081	1.65863e-20	1.91033e-18
Os05g0217700	20432.1	27961.9	17569.6	11077	19910.3	12006.8	11605.3	22840.8	15725.3	1224.23	6572.13	3217.21	1692.25	5668.87	3958.07	700.865	7064.89	1731.28	1.86076e-20	2.13323e-18
Os07g0178700	1849.92	1234.56	1216.51	295.54	516.033	767.017	766.597	1630.3	1227.1	213.379	181.122	96.6922	135.609	265.292	121.341	66.9525	194.625	133.894	1.91039e-20	2.18039e-18
Os04g0423600	3406.54	8987.33	6087.37	4984.01	6650.8	4122.84	6042.04	7114.32	6515.51	2286.21	2796.52	2130.52	1931	2463.88	2472.99	1859.71	3395.7	2199.13	1.95285e-20	2.21899e-18
Os04g0117900	340.174	368.396	231.166	541.08	263.177	238.11	287.865	250.387	234.484	1219.31	1162.28	1750.35	966.456	873.208	1939.31	1516.4	1498.61	1468.16	2.09952e-20	2.37514e-18
Os08g0386200	387.053	37.2782	53.9387	80.3584	46.443	56.741	75.0952	26.7079	90.8279	989.215	193.541	312.052	1045.72	123.516	326.439	762.831	181.309	148.685	2.15289e-20	2.42484e-18
Os01g0609900	316.133	148.016	65.4971	595.545	73.9647	111.456	120.987	38.949	48.1944	1937.13	495.756	1126.24	673.272	300.736	632.476	698.728	296.035	354.975	2.46384e-20	2.76294e-18
Os02g0199200	46.8791	53.7244	65.4971	108.93	56.7636	67.8865	63.6223	82.3494	52.8285	222.229	151.107	299.965	232.064	367.327	280.265	325.503	349.301	279.465	2.51659e-20	2.80983e-18
Os06g0521500	0	0	3.85277	0	8.60055	0	2.08598	0	3.70726	110.131	102.463	188.989	77.3547	45.1104	201.877	119.66	102.434	185.272	2.57171e-20	2.85894e-18
Os03g0703200	1268.14	1061.33	1025.8	1242.88	1132.69	1210.81	886.541	995.982	1039.89	2810.32	1827.78	2615.08	2089.53	1837.71	2489.1	2689.5	2025.13	1944.58	2.75628e-20	3.05091e-18
Os05g0113400	2027.82	1397.93	2248.09	1156.27	1474.13	1376.98	1885.72	2683.03	2457.91	694.221	895.258	691.129	669.452	823.801	786.031	888.901	922.933	882.767	2.85428e-20	3.14583e-18
Os01g0194300	262.042	70.1706	70.313	154.467	92.8859	125.641	102.213	72.3339	57.4625	537.874	255.64	466.979	418.288	355.513	527.242	561.261	313.449	369.766	2.94122e-20	3.2278e-18
Os12g0210400	873.874	1578.84	1222.29	1644.67	1431.13	978.782	1490.43	856.879	1395.78	5070.96	3361.62	5095.02	4124.63	3664.68	5345.44	4659.61	3753.19	4173.29	3.13525e-20	3.41376e-18
Os03g0437200	9.61622	6.5785	0	0	0	0	4.17196	0	0	181.913	28.9795	114.273	178.584	19.333	62.2811	241.456	8.19474	24.9105	3.13726e-20	3.41376e-18
Os04g0380300	597.407	698.417	260.062	616.081	358.643	188.461	237.801	148.006	178.875	1136.71	815.565	749.364	1038.08	889.319	765.628	1533.5	984.393	690.489	3.20167e-20	3.46915e-18
Os09g0452800	159.87	171.041	281.252	125.895	173.731	213.792	205.469	250.387	257.655	54.0824	89.0083	90.0995	79.2647	107.406	89.1264	60.5422	88.0935	60.7194	3.40553e-20	3.67453e-18
Os08g0444440	143.041	67.9778	41.4173	67.8582	27.5217	30.397	16.6878	8.90264	7.41452	24.5829	6.20988	8.7902	15.2799	4.29622	4.29525	8.54713	4.09737	1.55691	5.20351e-20	5.59106e-18
Os05g0395000	7209.76	4804.5	4168.69	2703.61	3490.1	3697.28	2642.93	4199.82	3618.29	1655.9	1481.06	1199.86	1697.03	1881.75	1283.21	1403.87	1258.92	1271.22	5.69967e-20	6.09865e-18
Os08g0384500	235.597	308.093	213.829	184.824	222.754	101.323	203.383	190.294	299.361	3142.68	730.696	2338.19	1431.54	721.766	2307.62	3042.07	1158.53	1507.09	6.41302e-20	6.83346e-18
Os01g0745000	0	0	0	0	0	2.02646	0	0	0	7.86652	13.4547	94.4946	7.63997	24.7033	41.8787	24.9291	27.6572	46.7073	7.14999e-20	7.58726e-18
Os11g0209000	9471.97	4159.8	4083.93	3335.77	3647.49	2136.91	3064.3	4419.05	3152.1	914.483	936.657	926.267	806.972	914.022	1290.72	1336.2	1480.17	1107.74	9.1052e-20	9.62228e-18
Os07g0507000	692.368	324.539	401.651	509.83	455.829	486.351	435.969	484.081	414.286	1318.63	1074.31	1430.6	1286.38	868.911	1256.36	1288.48	1231.26	1007.32	1.01829e-19	1.07171e-17
Os07g0538400	149.051	55.9172	41.4173	114.288	37.8424	48.6351	27.1177	35.6105	16.6827	555.573	193.541	390.065	278.859	136.405	329.66	299.149	197.698	280.244	1.0285e-19	1.07803e-17
Os01g0940800	106.98	100.87	26.9694	114.288	29.2419	30.397	10.4299	23.3694	7.41452	878.101	885.943	1129.54	508.058	166.479	1026.56	846.878	567.486	639.889	1.10527e-19	1.15379e-17
Os10g0513200	236.799	265.333	318.817	233.932	298.439	279.652	289.951	296.013	276.191	97.3482	131.443	101.087	133.699	92.3688	115.972	81.1977	131.116	116.768	1.1243e-19	1.1689e-17
Os09g0419200	3163.74	3845.13	3473.27	2938.44	3095.34	2991.06	2619.99	3907.14	3157.66	1803.4	1926.1	1721.78	1854.6	2173.89	1782.53	1720.11	2336.53	1452.6	1.4176e-19	1.4679e-17
Os12g0512800	4.80811	0	0	3.57149	0	0	0	0	0	97.3482	17.5947	43.951	47.7498	23.6292	36.5096	19.9433	8.19474	26.4674	1.45942e-19	1.50513e-17
Os01g0364800	28.8486	112.931	69.3498	50.0008	51.6033	66.8733	52.1494	57.8671	63.0234	307.778	230.801	264.805	254.029	230.922	367.244	285.617	275.548	232.758	1.70492e-19	1.75129e-17
Os04g0119400	1080.62	1291.58	1222.29	1650.03	1394.15	1698.18	1664.61	1493.42	1485.68	2442.56	2627.82	3137	2345.47	2715.21	2461.18	2909.59	2294.53	3226.69	1.80907e-19	1.85087e-17
Os03g0660500	0	0	0	0	0	0	0	0	0	49.1658	11.3848	79.1118	29.6049	4.29622	49.3954	32.0517	10.2434	15.5691	1.85796e-19	1.89335e-17
Os01g0742400	64.9095	20.8319	36.6013	50.8937	36.1223	48.6351	27.1177	28.9336	25.024	936.116	76.5885	331.83	425.928	75.1839	213.689	670.237	54.2902	147.906	1.94017e-19	1.96931e-17
Os01g0627967	450.76	131.57	34.6749	161.61	89.4457	77.0056	129.331	91.252	65.8039	138.647	6.20988	13.1853	148.979	23.6292	12.8857	0.712261	0	0	2.02035e-19	2.04263e-17
Os02g0209300	93.7581	19.7355	9.63192	21.4289	10.3207	4.05293	14.6018	11.1283	12.9754	331.377	39.3293	162.619	234.929	53.7028	114.898	333.338	32.779	88.7438	2.43693e-19	2.45413e-17
Os08g0202300	431.528	1738.92	1052.77	1717.88	1642.7	1108.48	1548.84	625.41	1169.64	7262.77	6457.24	11247.1	5482.63	6531.34	10760.7	8156.1	7923.29	7952.69	2.75568e-19	2.76429e-17
Os02g0181300	694.772	215.994	180.117	291.969	185.772	176.302	112.643	121.298	161.266	3624.5	397.432	869.131	1916.68	451.104	862.271	3948.06	533.682	467.851	2.78321e-19	2.78105e-17
Os08g0139100	7452.57	5313.23	5762.78	4360.78	5074.32	4775.36	4257.48	5019.97	5724.94	2849.65	2604.01	2300.83	2741.79	2834.43	2199.17	2393.91	2592.61	2540.87	3.14986e-19	3.13521e-17
Os06g0110000	221.173	285.068	245.614	516.973	302.739	266.48	230.501	289.336	264.142	1123.93	756.571	1080.1	771.637	881.8	1000.79	806.991	540.853	694.381	3.19835e-19	3.17118e-17
Os04g0295400	369.022	538.34	292.81	309.826	378.424	211.765	212.77	251.499	287.313	114.065	146.967	99.9885	151.844	164.331	154.629	114.674	131.116	81.7377	3.22831e-19	3.18858e-17
Os11g0565000	9.61622	6.5785	13.4847	14.2859	13.7609	10.1323	14.6018	4.45132	16.6827	78.6652	117.988	110.976	34.3799	64.4434	128.857	118.948	79.8987	96.5283	3.48627e-19	3.43017e-17
Os01g0670100	24.0405	43.8567	11.5583	65.1796	18.0611	20.2646	44.8485	17.8053	12.9754	383.493	166.632	449.399	316.104	146.072	428.451	320.517	226.38	256.89	3.65914e-19	3.58651e-17
Os05g0468900	131.021	23.0247	31.7853	78.5727	49.8832	55.7278	45.8915	51.1902	78.7793	346.127	135.582	216.459	344.754	206.219	265.232	563.398	284.767	264.674	3.85706e-19	3.76613e-17
Os07g0114000	421.911	65.785	65.4971	117.859	67.0843	46.6087	50.0635	37.8362	27.8045	477.891	134.547	142.841	375.313	122.442	201.877	394.592	166.968	118.325	3.90951e-19	3.80289e-17
Os02g0327500	26.4446	10.9642	46.2332	26.7861	39.5625	50.6616	66.7513	28.9336	77.8525	563.44	122.128	320.842	393.458	85.9245	223.353	401.715	98.3369	126.888	4.14378e-19	4.01556e-17
Os04g0444800	6915.26	12705.3	8506.91	8841.21	10612.2	6991.3	6558.31	8423.01	8289.43	4501.62	4547.7	3762.2	4284.11	4970.73	4324.24	3797.77	4916.84	3088.13	4.33437e-19	4.18446e-17
Os10g0570200	4.80811	2.19283	1.92638	1.78574	5.16033	0	2.08598	2.22566	7.41452	220.263	75.5536	306.558	43.9298	15.0368	253.42	51.995	80.9231	168.146	5.2227e-19	5.02318e-17
Os02g0484975	192.324	65.785	74.1658	105.359	71.3845	103.35	98.041	82.3494	60.243	16.7164	19.6646	4.3951	42.0198	15.0368	15.0334	22.0801	6.14605	9.34145	5.54522e-19	5.31348e-17
Os10g0140300	40.8689	37.2782	26.0062	23.2147	21.5014	12.1588	25.0317	61.2056	51.9016	0	0	0	3.81998	0	4.29525	0	0	0	6.24505e-19	5.96181e-17
Os03g0427000	300.507	283.972	380.461	375.006	384.444	334.367	350.444	367.234	383.701	566.39	535.085	714.203	638.892	753.987	774.219	612.544	758.013	660.908	6.80406e-19	6.44753e-17
Os09g0536400	357.002	427.602	379.498	292.862	338.001	308.023	255.532	330.51	314.19	192.73	199.751	179.1	181.449	257.773	236.239	166.669	185.406	163.475	6.78825e-19	6.44753e-17
Os02g0512000	0	2.19283	7.70554	5.35723	1.72011	4.05293	7.30092	6.67698	12.9754	21.6329	33.1194	81.3093	29.6049	68.7396	71.9454	64.1035	89.1178	66.1686	6.90817e-19	6.52213e-17
Os02g0787600	86.5459	254.369	160.853	141.074	199.533	154.011	207.555	214.776	241.899	924.317	490.581	699.919	571.088	602.546	797.843	750.723	752.892	754.322	8.70463e-19	8.18809e-17
Os03g0806600	305.315	301.515	260.062	583.938	240.815	264.454	233.63	252.612	208.533	1339.28	599.254	1295.46	961.681	1307.13	1388.44	1992.91	842.009	1052.47	9.13808e-19	8.55298e-17
Os03g0820500	6823.91	1402.32	628.001	2335.75	613.219	639.349	312.897	708.872	338.287	858.434	99.3581	41.7534	175.719	65.5174	42.9525	37.7498	53.2658	10.8984	9.15915e-19	8.55298e-17
Os08g0189900	0	0	0	5.35723	0	0	0	0	0	66.8655	71.4136	127.458	44.8848	8.59245	54.7644	61.2544	73.7527	64.6117	9.28409e-19	8.63824e-17
Os06g0661900	206.749	190.776	256.209	281.255	236.515	249.255	331.67	182.504	275.264	499.524	465.741	571.363	449.803	417.808	432.746	562.686	407.688	513.001	9.93555e-19	9.21101e-17
Os01g0239700	1721.3	2067.84	1682.7	1783.96	1821.6	1861.31	1994.19	1674.81	2033.43	3244.94	3145.31	4283.02	3028.29	3513.24	4098.74	3131.1	4442.57	3916.4	1.26722e-18	1.17059e-16
Os08g0517200	319.739	751.045	665.566	888.407	737.927	817.678	737.393	472.953	679.355	2090.53	1576.28	2613.98	1525.13	2065.41	2601.85	2277.81	2254.58	2337.7	1.27422e-18	1.17283e-16
Os02g0242900	10.8182	3.28925	1.92638	4.46436	0.860055	2.02646	2.08598	0	0	53.099	24.8395	82.4081	51.5698	25.7773	112.75	54.1318	58.3875	66.1686	1.41525e-18	1.29799e-16
Os07g0663800	2244.18	522.991	588.51	1153.59	827.373	980.809	440.141	496.322	298.434	3713.98	2858.62	3556.73	3181.09	2240.48	2750.03	3641.08	2340.62	2457.58	1.47123e-18	1.34453e-16
Os04g0565400	216.365	453.916	353.491	347.327	449.809	287.758	346.272	482.968	416.14	1005.93	788.655	1160.31	690.462	1104.13	1422.8	988.618	1301.94	1156.78	1.50255e-18	1.36828e-16
Os03g0664800	271.658	24.1212	12.5215	79.4656	19.7813	22.2911	11.4729	6.67698	9.26815	577.206	128.338	343.916	297.004	158.96	286.708	416.673	154.676	178.266	1.70694e-18	1.54891e-16
Os10g0348900	133.425	54.8208	21.1902	112.502	34.4022	56.741	21.9028	22.2566	22.2436	326.461	208.031	394.46	297.004	296.44	212.615	371.8	164.919	236.65	1.88441e-18	1.70393e-16
Os05g0322900	518.074	176.523	225.387	223.218	184.912	207.713	198.168	125.75	291.02	2285.23	653.073	980.107	1906.17	320.069	857.976	962.976	328.814	340.963	2.08683e-18	1.88035e-16
Os06g0703900	593.801	837.662	1061.44	688.404	755.988	678.865	1144.16	994.87	1169.64	331.377	452.286	373.583	337.114	442.511	336.103	374.649	399.494	493.54	2.13142e-18	1.91381e-16
Os05g0161500	5577.41	15727	11656.5	5355.44	10644	12633	7150.73	11070.4	8250.51	1525.12	3557.23	1119.65	2324.46	4055.64	3014.19	1253.58	2410.28	479.528	2.25396e-18	2.01678e-16
Os09g0438100	2505.02	1855.14	1120.19	895.55	1344.27	908.869	1252.63	1757.16	1358.71	116.031	227.696	176.903	126.059	341.55	342.546	54.1318	430.224	155.691	2.36514e-18	2.10892e-16
Os12g0105300	2383.62	3312.27	2198	1875.03	2349.67	1580.64	1784.55	2898.92	2117.77	1310.76	1265.78	893.304	907.246	1313.57	1257.43	920.241	1355.21	720.849	3.10996e-18	2.76345e-16
Os04g0585900	61.3034	37.2782	87.6505	46.4293	32.6821	50.6616	52.1494	110.17	79.7061	3.93326	2.06996	0	5.72998	5.37028	6.44287	9.97165	14.3408	4.67073	3.1454e-18	2.78531e-16
Os11g0569600	12.0203	37.2782	25.043	49.1079	51.6033	40.5293	45.8915	13.354	53.7553	143.564	160.422	281.286	152.799	186.886	271.675	262.824	169.017	233.536	3.95195e-18	3.48749e-16
Os04g0154800	43.273	10.9642	7.70554	5.35723	3.44022	10.1323	12.5159	6.67698	3.70726	234.029	67.2737	261.508	94.5446	50.4806	252.346	80.4855	94.2395	140.122	4.85673e-18	4.27126e-16
Os09g0272900	653.903	1391.35	775.369	1992.89	1088.83	1011.21	1277.66	574.22	828.573	3957.84	4233.07	5880.64	3185.87	4108.26	5213.36	5354.78	4874.85	5009.35	5.25611e-18	4.60672e-16
Os04g0370900	168.284	39.471	54.9019	80.3584	122.128	19.2514	77.1812	52.303	29.6581	1498.57	742.081	1277.87	910.111	249.181	1131.8	725.081	701.675	630.548	5.40498e-18	4.72109e-16
Os05g0486100	51.6872	226.958	56.8283	188.396	110.087	89.1644	79.2672	68.9954	60.243	1306.83	497.826	780.13	716.247	540.25	687.24	1549.88	538.804	570.607	7.50709e-18	6.53498e-16
Os11g0475000	0	0	0	0	0	0	0	0	0	26.5495	14.4897	62.6301	29.6049	5.37028	49.3954	9.25939	14.3408	28.0244	7.87993e-18	6.83637e-16
Os09g0570400	4124.15	4001.92	3932.71	2904.51	3368.83	2852.25	2999.64	2949	3425.51	1926.31	2328.71	2279.96	2156.38	2618.55	2352.72	1923.1	2163.41	1820.8	8.06659e-18	6.97475e-16
Os03g0850400	1983.34	9229.63	6411.97	2908.08	6108.97	4464.3	4356.56	5370.51	6792.63	1477.92	1147.79	661.462	880.506	1529.46	661.468	772.091	1343.94	877.318	9.23138e-18	7.9551e-16
Os05g0278500	24.0405	20.8319	36.6013	48.2151	54.1834	44.5822	33.3756	22.2566	38.9262	205.513	151.107	280.188	155.664	44.0363	262.01	155.273	113.702	137.008	1.12057e-17	9.62417e-16
Os03g0856000	468.791	302.611	313.037	338.398	309.62	295.864	274.306	292.674	249.313	766.986	590.974	725.191	611.197	584.287	617.442	520.663	559.291	497.432	1.26071e-17	1.07917e-15
Os01g0221000	246.416	194.066	154.111	332.148	236.515	216.832	249.274	203.648	152.924	419.876	292.899	337.324	538.618	359.809	386.572	409.55	374.909	285.693	1.26515e-17	1.07937e-15
Os05g0427400	64.9095	19.7355	183.006	99.1087	59.3438	139.826	183.566	169.15	178.875	886.951	447.112	1261.39	665.632	206.219	760.259	575.507	542.902	464.737	1.51136e-17	1.28516e-15
Os05g0375400	2983.43	8808.61	3994.36	7479.58	6293.88	3692.22	3185.29	3407.48	3648.87	13571.7	20802.1	25730	12033	21603.6	20004.1	13191.8	17770.3	17908.3	1.52264e-17	1.29047e-15
Os02g0807800	4.80811	4.38567	0	10.7145	6.88044	0	0	0	0	250.745	31.0494	161.52	169.034	23.6292	158.924	212.254	45.0711	76.2885	1.5483e-17	1.30791e-15
Os04g0244800	15021.7	4170.77	2372.34	3226.84	3048.03	2380.08	1390.3	2167.79	1532.03	1306.83	620.988	359.299	1056.23	1151.39	641.066	798.444	644.311	326.172	1.66988e-17	1.40598e-15
Os11g0156300	28.8486	24.1212	48.1596	66.0725	48.1631	68.8998	96.998	51.1902	58.3893	123.898	159.387	183.495	143.249	106.332	129.931	181.626	141.359	191.5	1.73478e-17	1.45585e-15
Os07g0539100	302.911	229.151	125.215	183.932	236.515	181.369	181.48	122.411	165.9	1378.61	689.297	2422.8	886.236	502.658	1165.09	611.12	1074.54	1273.55	1.88298e-17	1.57508e-15
Os03g0298300	1153.95	901.254	744.547	976.801	592.578	589.701	548.612	617.62	466.188	510.341	330.159	302.163	391.548	419.956	234.091	328.352	324.717	282.579	1.89762e-17	1.58217e-15
Os06g0520733	69.7176	70.1706	87.6505	65.1796	101.486	78.0189	89.6971	82.3494	117.706	5.89989	0	3.29632	21.9649	20.4071	16.1072	21.3678	11.2678	3.11382	2.13074e-17	1.77079e-15
Os09g0497000	796.944	437.47	647.265	534.83	559.896	542.079	695.674	605.379	756.281	176.997	258.745	267.002	222.514	263.144	287.782	292.027	276.572	309.046	2.16907e-17	1.79683e-15
Os05g0426200	1912.42	2230.11	2255.8	2697.36	2495.88	2189.59	2248.68	1852.86	2604.35	5199.77	4238.24	5819.11	3816.16	3811.83	5335.77	5871.88	4227.46	4347.67	2.27259e-17	1.87653e-15
Os11g0625900	0	1.09642	18.3006	5.35723	3.44022	3.0397	12.5159	6.67698	9.26815	236.979	72.4486	204.372	84.9947	18.259	110.603	230.06	112.678	84.0731	2.32628e-17	1.91471e-15
Os01g0763750	213.961	212.705	217.681	269.647	230.495	203.66	213.813	152.458	158.485	558.523	378.803	536.202	485.138	375.92	631.402	571.945	396.421	360.424	2.43808e-17	2.00031e-15
Os01g0796000	167.082	30.6997	11.5583	6.2501	3.44022	12.1588	2.08598	2.22566	9.26815	346.127	53.819	286.78	168.079	119.22	244.829	574.082	143.408	158.805	2.50193e-17	2.04617e-15
Os06g0487620	8.41419	43.8567	18.3006	25.8933	38.7025	22.2911	17.7308	28.9336	24.0972	70.7987	79.6935	136.248	71.6247	91.2948	107.381	121.084	177.211	148.685	2.57395e-17	2.09838e-15
Os07g0628700	3044.73	8667.17	7529.27	7591.19	7660.51	6089.52	5513.24	5275.92	7568.37	1541.84	707.927	387.867	1018.98	1008.54	662.542	1029.22	793.865	193.057	2.74456e-17	2.23039e-15
Os01g0621900	3675.8	6565.34	5904.37	5984.02	6078.87	5399.51	4712.22	4651.63	5771.28	2682.48	1238.87	1221.84	2299.63	1557.38	1604.28	1769.26	1187.21	1287.56	2.76524e-17	2.24011e-15
Os07g0603800	259.638	683.067	432.473	463.4	545.275	468.113	559.042	431.778	474.529	1537.91	1150.9	1528.4	1230.03	1437.09	1371.26	1430.93	1380.81	1518.76	2.81411e-17	2.27253e-15
Os03g0388100	883.49	1105.19	1091.3	708.047	1007.12	775.122	513.151	971.5	733.111	450.358	427.447	358.201	358.124	561.731	424.156	339.748	454.808	249.884	2.85839e-17	2.30105e-15
Os08g0409100	1579.46	1621.6	2352.11	1876.82	1842.24	1640.42	2720.12	2711.97	3675.75	441.509	571.309	565.869	431.658	519.843	1170.46	840.468	1108.34	707.615	2.92864e-17	2.35023e-15
Os02g0600400	250.022	161.173	209.013	241.075	204.693	166.17	182.523	180.278	207.607	615.555	437.797	827.377	405.873	365.179	854.755	624.653	453.784	626.656	2.99333e-17	2.38723e-15
Os07g0528200	0	0	0	0	0.860055	2.02646	1.04299	0	0	29.4995	42.4342	52.7412	22.9199	6.44434	64.4287	28.4904	26.6329	24.9105	2.99137e-17	2.38723e-15
Os02g0763900	330.557	228.055	209.013	283.04	262.317	246.215	214.856	182.504	265.996	916.45	435.727	594.437	659.902	474.733	664.69	1106.85	491.684	491.205	3.15439e-17	2.50789e-15
Os07g0654500	0	20.8319	5.77915	22.3218	24.0815	26.344	14.6018	20.0309	13.9022	271.395	135.582	276.891	209.144	106.332	263.084	93.3062	80.9231	144.792	3.47011e-17	2.75038e-15
Os04g0500700	3313.99	2949.36	2396.42	2921.48	2606.83	2576.65	2593.91	2255.71	2494.99	5629.48	4424.54	4746.71	4392.03	3931.05	4410.15	3968.72	4470.23	4413.84	3.87652e-17	3.06304e-15
Os07g0572300	254.83	299.322	298.589	204.468	201.253	291.811	257.618	303.802	290.093	114.065	153.177	116.47	145.159	166.479	170.736	121.797	117.799	108.984	4.34423e-17	3.42208e-15
Os09g0541000	3911.4	2930.72	4120.54	1342.88	2281.73	2689.12	2794.17	3495.4	3992.72	566.39	1059.82	779.031	431.658	973.095	1256.36	739.327	1361.35	608.751	4.5971e-17	3.6102e-15
Os05g0258400	18.0304	18.6391	5.77915	8.03584	12.9008	5.06616	12.5159	5.56415	5.56089	90.465	51.749	64.8277	72.5797	47.2585	89.1264	74.7874	56.3388	43.5934	5.27355e-17	4.1288e-15
Os02g0681200	156.264	211.608	193.602	177.681	243.395	163.13	192.953	229.243	337.361	599.822	448.147	672.45	625.522	525.213	769.924	792.034	515.244	555.038	5.41913e-17	4.22989e-15
Os10g0509100	3324.81	1908.86	1859.92	2202.71	2041.77	2121.71	2204.88	1822.81	2091.82	5898.91	3541.7	4554.42	4284.11	3617.42	4367.2	6259.35	3589.3	3417.41	6.0835e-17	4.73407e-15
Os04g0630800	211.557	164.462	79.9449	183.932	83.4253	86.1247	84.4821	44.5132	25.024	560.49	365.348	642.783	369.583	272.81	511.135	428.781	457.881	414.138	6.70433e-17	5.20143e-15
Os04g0423100	831.803	583.294	811.008	463.4	659.662	754.858	746.78	1190.73	936.083	168.147	201.821	135.149	294.139	263.144	181.474	166.669	425.102	226.53	6.86357e-17	5.30893e-15
Os10g0524700	45.677	31.7961	25.043	16.9646	37.8424	14.1852	19.8168	13.354	21.3167	120.948	109.708	168.113	74.4897	102.035	181.474	111.113	132.14	167.368	7.84433e-17	6.04932e-15
Os12g0611100	222.375	215.994	129.068	263.397	159.97	142.866	135.589	149.119	122.34	556.557	335.334	605.425	481.318	414.586	479.994	484.337	431.248	413.359	9.17772e-17	7.05641e-15
Os12g0556500	52.8892	30.6997	15.4111	46.4293	39.5625	20.2646	42.7625	28.9336	18.5363	331.377	144.897	268.101	128.924	81.6283	219.058	212.966	151.603	134.673	9.59136e-17	7.35242e-15
Os01g0925100	22.8385	15.3498	20.227	37.5006	21.5014	40.5293	39.6336	16.6924	12.0486	113.081	37.2593	63.7289	105.05	70.8877	106.307	118.235	66.5823	79.4023	9.69707e-17	7.41133e-15
Os07g0115500	1678.03	712.671	287.994	343.756	352.622	288.771	254.489	612.056	386.482	88.4984	26.9095	4.3951	42.0198	25.7773	49.3954	12.8207	26.6329	21.7967	1.11071e-16	8.46381e-15
Os08g0484200	158.668	35.0853	30.8221	64.2867	31.822	75.9924	35.4616	22.2566	29.6581	280.245	168.702	334.027	230.154	199.774	234.091	379.635	249.94	193.057	1.24704e-16	9.47454e-15
Os01g0741900	463.982	237.922	97.2824	750.012	206.413	265.467	189.824	170.263	184.436	1187.85	560.959	919.674	1157.46	890.393	911.667	1957.29	621.776	720.849	1.33469e-16	1.01106e-14
Os05g0215300	191.122	546.015	327.485	244.647	340.582	220.885	240.93	290.448	205.753	111.115	189.401	116.47	128.924	270.662	154.629	86.1835	184.382	93.4145	1.34333e-16	1.01461e-14
Os11g0526200	2997.86	3025.01	2700.79	1943.78	2592.2	1907.92	2000.45	3166	2824.93	1507.42	1562.82	1300.95	1331.26	1688.42	1595.69	1371.81	1658.41	1352.95	1.39848e-16	1.05104e-14
Os09g0447300	16.8284	13.157	21.1902	14.2859	13.7609	2.02646	6.25793	13.354	9.26815	146.514	39.3293	163.717	95.4996	68.7396	141.743	126.782	153.651	140.9	1.39975e-16	1.05104e-14
Os07g0543300	251.224	354.142	173.375	323.219	88.5856	200.62	204.426	640.99	558.869	60.9656	9.31482	4.3951	9.54996	4.29622	2.14762	13.533	25.6086	22.5752	1.64288e-16	1.23001e-14
Os03g0189400	597.407	724.731	289.921	629.474	409.386	350.578	336.885	390.603	320.678	1684.42	1140.55	2068.99	1300.7	1612.16	2241.05	1715.84	1601.05	1796.67	1.65186e-16	1.23313e-14
Os04g0538400	0	0	1.92638	1.78574	0	0	0	2.22566	3.70726	17.6997	28.9795	52.7412	5.72998	45.1104	92.3479	33.4763	71.704	37.3658	1.69153e-16	1.25908e-14
Os02g0638650	52.8892	187.487	192.638	204.468	190.932	154.011	187.738	96.8162	209.46	23.5996	11.3848	24.173	15.2799	17.1849	25.7715	33.4763	9.21908	12.4553	1.84935e-16	1.37258e-14
Os03g0133800	74.5257	74.5563	42.3804	89.2871	68.8044	43.569	59.4504	46.7388	38.9262	154.381	111.778	145.038	155.664	115.998	133.153	205.131	163.895	124.553	2.33404e-16	1.72733e-14
Os09g0353200	0	24.1212	3.85277	1.78574	8.60055	2.02646	12.5159	15.5796	15.7559	141.597	99.3581	134.05	61.1197	68.7396	123.488	100.429	182.333	104.313	2.38873e-16	1.76272e-14
Os09g0325700	1147.94	180.909	162.779	275.004	133.308	109.429	32.3327	125.75	75.9988	66.8655	10.3498	10.9877	21.0099	6.44434	12.8857	9.97165	6.14605	7.78454	2.47456e-16	1.82082e-14
Os07g0142900	10514.1	25148.5	17581.1	18569.9	17368.8	15424.4	10221.3	16820.4	15496.3	6074.92	5292.89	2205.24	3917.39	5603.35	4081.56	2622.54	4707.88	1214.39	2.49589e-16	1.83127e-14
Os02g0629000	186.314	48.2423	25.043	153.574	43.0027	46.6087	20.8598	10.0155	18.5363	258.612	80.7285	96.6922	269.309	135.331	53.6906	255.702	40.9737	68.504	2.65609e-16	1.94326e-14
Os01g0892500	0	2.19283	5.77915	0	1.72011	8.10586	2.08598	4.45132	3.70726	44.2492	45.5391	72.5191	20.0549	25.7773	51.543	59.1176	53.2658	49.0426	3.02454e-16	2.20029e-14
Os01g0974200	22098.1	11883	9809.15	4625.97	8745.04	5242.46	5894.97	10680.9	8709.28	3308.86	3998.13	2610.69	2185.99	2959.02	3008.82	2420.97	2874.3	2552.55	3.01707e-16	2.20029e-14
Os04g0128700	21.6365	2.19283	0	3.57149	0	4.05293	2.08598	0	1.85363	164.214	23.8045	58.2351	70.6697	8.59245	32.2144	51.2828	22.5355	21.0183	3.3327e-16	2.41762e-14
Os10g0552600	0	2.19283	1.92638	12.5002	15.481	8.10586	8.34391	13.354	14.829	23.5996	69.3437	236.237	70.6697	50.4806	75.1669	121.084	79.8987	94.193	3.41924e-16	2.47341e-14
Os08g0138900	7992.28	5636.68	2882.83	5003.65	4053.44	3065.03	3216.58	5175.77	3767.5	1131.8	840.404	714.203	1099.2	1467.16	1626.83	996.453	2293.5	1145.11	3.59022e-16	2.5898e-14
Os09g0547500	340.174	93.1954	68.3866	153.574	88.5856	68.8998	109.514	100.155	40.7799	750.27	342.579	562.573	594.963	247.033	482.142	496.446	329.838	344.855	3.6821e-16	2.64864e-14
Os03g0650200	1346.27	653.464	366.013	352.684	523.773	311.062	365.046	486.306	393.896	87.5151	98.3231	54.9387	83.0847	100.961	163.219	63.3912	153.651	85.63	3.93225e-16	2.82068e-14
Os01g0238500	10835.1	24833.8	21151.7	11997.5	18522.1	14931	14043.8	17178.7	18241.6	4492.77	9747.45	4867.57	4087.38	10790	7886.08	5850.51	9973	4176.41	3.96472e-16	2.83605e-14
Os04g0487200	843.823	685.26	663.639	674.118	707.825	849.088	680.029	564.205	675.648	2039.4	1056.71	1521.8	1452.55	1056.87	1361.59	1619.68	1095.02	1162.23	4.04802e-16	2.88759e-14
Os07g0106200	884.692	612.897	289.921	1120.55	726.746	282.692	336.885	260.402	210.387	3983.41	2637.13	3486.41	2045.6	1012.83	3217.14	2500.75	1811.04	1819.25	4.51591e-16	3.21242e-14
Os01g0944100	1048.17	2392.38	805.228	2403.61	1210.96	642.389	816.66	578.671	747.94	659.805	40.3642	52.7412	87.8596	53.7028	34.362	163.108	22.5355	26.4674	4.57861e-16	3.24803e-14
Os10g0467900	254.83	168.848	207.086	205.36	134.169	185.421	171.05	190.294	157.559	483.791	396.397	447.201	400.143	351.216	306.037	337.612	398.469	390.784	4.85372e-16	3.4337e-14
Os01g0837000	100.97	80.0384	81.8713	143.752	91.1658	140.839	96.998	68.9954	179.802	554.59	184.227	531.807	563.448	337.254	310.332	615.393	239.696	262.339	4.92761e-16	3.4764e-14
Os11g0567800	0	4.38567	15.4111	0	6.88044	10.1323	10.4299	6.67698	5.56089	100.298	103.498	245.027	68.7597	60.1471	134.227	116.811	128.043	71.6178	4.97208e-16	3.49817e-14
Os03g0225700	140.637	168.848	116.546	219.646	156.53	110.442	186.695	135.765	129.754	813.202	225.626	550.486	541.483	323.291	423.082	653.143	457.881	384.556	5.05278e-16	3.53557e-14
Os08g0171700	611.832	411.156	413.209	251.79	352.622	267.493	317.069	419.537	280.825	176.013	192.506	110.976	148.024	169.701	172.884	156.697	158.773	138.565	5.0508e-16	3.53557e-14
Os10g0109300	2191.3	1351.88	1435.16	4138.46	2194.86	2393.25	2817.11	3827.02	3874.09	5268.6	5734.83	10020.8	6737.5	4635.63	7392.12	10105.6	7125.33	9807.75	5.46854e-16	3.81609e-14
Os08g0337700	290.891	365.107	413.209	463.4	363.803	494.457	361.917	321.608	408.725	665.705	758.641	780.13	686.642	691.692	869.788	617.53	718.064	604.08	5.68164e-16	3.95405e-14
Os02g0562700	2953.38	3068.87	3013.83	2460.75	3056.63	2510.79	2713.86	3524.33	3579.36	1729.65	1802.94	1837.15	1582.43	2265.18	1964	1859.71	2298.62	1848.05	6.46202e-16	4.48499e-14
Os02g0156600	19.2324	4.38567	6.74234	15.1788	8.60055	6.07939	18.7738	11.1283	3.70726	97.3482	27.9445	19.7779	55.3898	19.333	26.8453	54.8441	23.5599	17.9044	6.49865e-16	4.49826e-14
Os08g0547300	365.416	215.994	187.822	160.717	173.731	136.786	142.889	211.438	222.436	54.0824	55.8889	63.7289	51.5698	86.9986	62.2811	59.1176	77.85	47.4857	6.52527e-16	4.50454e-14
Os10g0180800	615.438	440.759	235.019	653.582	583.977	172.249	298.295	110.17	126.974	3294.11	1503.83	2527.18	1549	639.063	2158.36	2021.4	1530.37	1880.75	6.60057e-16	4.53216e-14
Os06g0125500	352.194	954.979	863.983	596.438	799.851	572.476	746.78	514.127	898.084	1669.67	1684.95	2285.45	1590.07	2130.93	3100.1	1721.53	2472.76	2271.53	6.5954e-16	4.53216e-14
Os04g0541700	1364.3	770.781	675.198	920.551	641.601	370.843	325.413	811.253	329.946	382.51	140.757	50.5436	141.339	60.1471	105.234	122.509	81.9474	59.941	6.75342e-16	4.62474e-14
Os06g0725200	68.5155	66.8814	81.8713	62.501	42.1427	56.741	78.2242	43.4003	112.145	249.762	251.5	315.348	145.159	295.365	326.439	326.215	197.698	191.5	6.82699e-16	4.66269e-14
Os05g0550800	45.677	20.8319	26.9694	41.0721	18.9212	18.2382	20.8598	12.2411	16.6827	118.981	53.819	126.359	84.9947	40.8141	78.3883	81.1977	49.1684	47.4857	7.43644e-16	5.06546e-14
Os07g0538200	31.2527	10.9642	2.88958	6.2501	4.30027	8.10586	2.08598	2.22566	0	83.5818	34.1544	83.5069	53.4798	38.666	71.9454	68.377	55.3145	58.3841	8.29115e-16	5.63272e-14
Os04g0517100	139.435	52.628	57.7915	66.9654	36.1223	89.1644	69.8803	62.3184	100.096	743.386	175.947	394.46	522.383	100.961	223.353	722.232	131.116	122.996	9.13246e-16	6.1879e-14
Os07g0530700	1375.12	1098.61	1006.54	756.262	809.311	709.262	537.139	885.812	689.55	483.791	534.05	398.855	420.198	596.101	396.237	277.782	445.589	312.16	9.85944e-16	6.6629e-14
Os01g0564300	93.7581	25.2176	86.6873	102.68	113.527	23.3043	122.03	53.4158	59.3162	480.841	824.879	710.907	762.087	266.366	906.298	781.35	929.079	671.806	1.00362e-15	6.75211e-14
Os03g0228200	2813.95	2893.44	1703.89	1578.6	2124.34	1197.64	1253.67	2164.45	1656.22	411.026	570.274	345.015	210.099	614.36	702.273	173.079	767.232	280.244	1.0044e-15	6.75211e-14
Os01g0583100	1210.44	2290.41	1755.9	1749.14	1491.33	1341.52	1083.67	1470.05	1344.81	646.038	465.741	181.298	456.488	561.731	438.115	459.408	325.741	270.902	1.01356e-15	6.79587e-14
Os01g0618100	2865.63	3341.88	2527.42	2072.35	2484.7	2141.97	1978.55	2453.79	2603.42	1450.39	1460.36	1092.18	986.511	1446.75	1511.93	1180.93	1357.25	1305.47	1.09311e-15	7.31015e-14
Os04g0584600	2280.25	1804.7	1454.42	1783.96	1542.08	1605.97	1543.62	1298.67	1732.22	5823.19	2545.02	3550.14	4707.18	2688.36	3401.84	6007.21	2570.08	2761.96	1.11304e-15	7.4241e-14
Os01g0714600	38.4649	27.4104	9.63192	17.8574	8.60055	6.07939	18.7738	8.90264	11.1218	299.911	39.3293	146.137	239.704	19.333	125.636	197.296	47.1198	39.7012	1.24137e-15	8.25867e-14
Os08g0448000	74.5257	4.38567	23.1166	5.35723	6.88044	25.3308	14.6018	15.5796	18.5363	353.01	64.1688	219.755	233.019	54.7769	170.736	290.602	75.8013	89.5222	1.25945e-15	8.35729e-14
Os06g0129100	56.4953	48.2423	43.3436	88.3943	67.0843	47.6219	29.2037	40.0619	59.3162	189.78	156.282	365.892	190.999	134.257	365.096	163.108	277.597	256.89	1.33719e-15	8.85025e-14
Os10g0389150	290.891	449.531	277.399	291.969	321.66	268.506	246.145	212.55	309.556	130.781	124.198	73.6179	118.42	126.739	98.7907	124.646	101.41	115.99	1.36606e-15	9.01811e-14
Os04g0691900	26.4446	258.754	208.049	89.2871	195.232	111.456	173.136	158.022	222.436	15.733	8.27984	9.88897	13.3699	18.259	17.181	15.6697	32.779	7.78454	1.37118e-15	9.02869e-14
Os01g0710700	2394.44	2809.02	3552.25	2721.47	3496.98	3117.71	3064.3	2807.67	3434.78	5340.39	5722.41	5541.12	4712.91	4795.66	5144.64	5706.63	5909.43	4976.66	1.42129e-15	9.33468e-14
Os03g0727600	0	6.5785	9.63192	8.92871	10.3207	12.1588	4.17196	2.22566	3.70726	25.5662	33.1194	49.4449	21.0099	45.1104	102.012	57.6931	47.1198	54.4918	1.44226e-15	9.44828e-14
Os06g0652300	39.6669	93.1954	34.6749	69.644	45.5829	30.397	31.2897	34.4977	30.5849	7.86652	4.13992	4.3951	0	5.37028	7.51669	0.712261	0	0.778454	1.46997e-15	9.60532e-14
Os03g0609800	313.729	469.266	350.602	509.83	406.806	389.081	407.809	359.444	401.311	716.837	777.27	1004.28	741.077	888.244	953.545	715.11	974.15	907.678	1.599e-15	1.04219e-13
Os11g0227200	6.01013	42.7602	39.4909	57.1438	49.0231	32.4234	38.5906	14.4668	34.2922	215.346	137.652	240.632	167.124	155.738	326.439	264.249	266.329	278.687	1.6032e-15	1.04229e-13
Os07g0687200	1354.68	574.522	746.474	808.942	795.551	792.347	802.059	805.689	656.185	2064.96	1642.51	1859.13	1698.94	1413.46	1971.52	2453.03	1774.16	1783.44	1.66076e-15	1.07698e-13
Os01g0337500	28.8486	35.0853	11.5583	1.78574	7.74049	4.05293	6.25793	2.22566	3.70726	111.115	100.393	142.841	54.4348	32.2217	77.3145	45.5847	30.7303	54.4918	1.69515e-15	1.09651e-13
Os11g0428500	97.3642	43.8567	28.8958	70.5368	48.1631	33.4367	20.8598	28.9336	24.0972	2.94995	4.13992	4.3951	21.0099	10.7406	12.8857	7.83487	2.04868	1.55691	1.76615e-15	1.13957e-13
Os04g0102700	802.954	641.404	714.688	741.976	800.711	928.12	979.367	809.027	940.717	1268.48	1202.65	1569.05	1368.51	1042.91	1205.89	1333.35	1308.09	1542.12	1.79136e-15	1.15293e-13
Os06g0551800	19.2324	54.8208	25.043	89.2871	49.0231	45.5954	34.4186	33.3849	24.0972	230.096	126.268	174.705	127.014	122.442	135.3	177.353	132.14	137.008	1.81095e-15	1.16263e-13
Os01g0681700	390.659	114.027	100.172	136.609	104.067	72.9527	56.3214	62.3184	48.1944	331.377	298.074	386.769	431.658	539.176	426.304	383.196	483.49	354.197	1.83636e-15	1.176e-13
Os09g0499000	235.597	160.077	186.859	234.825	126.428	188.461	137.675	114.621	151.998	359.893	271.165	298.867	325.654	250.255	245.903	440.889	263.256	264.674	1.84213e-15	1.17676e-13
Os01g0192300	1614.32	1260.88	828.345	1344.66	832.533	595.78	519.409	663.246	476.383	591.956	357.068	334.027	419.243	440.363	404.827	299.862	334.96	247.548	1.96824e-15	1.2542e-13
Os01g0389700	108.182	70.1706	44.3068	64.2867	39.5625	50.6616	52.1494	84.575	123.266	677.504	134.547	359.299	399.188	149.294	333.956	794.883	276.572	274.794	2.1381e-15	1.35907e-13
Os04g0382300	1476.09	1229.08	788.854	1423.24	1226.44	912.922	896.971	891.376	888.816	2317.67	1770.85	2058	2415.19	2000.97	1741.72	2396.05	1615.39	1788.11	2.35249e-15	1.49165e-13
Os03g0285800	231.991	83.3276	89.5768	104.466	104.067	74.9792	105.342	127.975	123.266	996.099	214.241	464.782	716.247	163.257	312.479	1206.57	298.084	265.453	2.43927e-15	1.54287e-13
Os05g0409500	36.0608	54.8208	40.4541	107.145	25.8016	32.4234	67.7943	51.1902	35.219	221.246	405.712	298.867	347.619	506.955	603.483	159.546	489.636	235.093	2.60382e-15	1.6429e-13
Os04g0648900	861.853	1041.6	1107.67	1088.41	968.422	1038.56	904.271	926.987	858.231	1467.11	1467.6	1511.91	1638.77	1705.6	1406.69	1559.14	1749.58	1524.21	2.67157e-15	1.68152e-13
Os12g0586300	437.538	455.013	400.688	325.005	307.04	270.533	320.198	400.619	303.069	184.863	216.311	201.076	284.589	289.995	220.132	217.952	254.037	215.632	2.70055e-15	1.6956e-13
Os12g0277000	81.7378	222.573	98.2456	198.217	165.991	145.905	129.331	123.524	126.974	622.439	410.887	477.967	463.173	357.661	477.847	494.309	448.662	381.443	2.75151e-15	1.72338e-13
Os09g0402300	508.457	859.59	531.682	642.867	718.146	448.862	572.601	616.508	588.528	279.262	436.762	315.348	308.464	411.364	312.479	303.423	389.25	312.16	2.85284e-15	1.78251e-13
Os01g0575200	21.6365	36.1817	53.9387	29.4648	44.7228	47.6219	73.0092	48.9645	40.7799	609.656	126.268	264.805	479.408	115.998	235.165	398.866	134.189	166.589	2.94412e-15	1.83507e-13
Os07g0416700	28.8486	21.9283	47.1964	53.5723	33.5421	37.4896	43.8055	24.4822	43.5603	171.097	79.6935	135.149	140.384	75.1839	132.079	117.523	83.9961	63.0548	3.09487e-15	1.92436e-13
Os01g0706900	420.709	430.892	372.755	231.254	354.343	221.898	220.071	420.65	388.336	82.5985	93.1482	79.1118	78.3097	129.961	106.307	180.202	135.213	66.9471	3.16067e-15	1.96053e-13
Os11g0569500	0	14.2534	24.0798	30.3576	27.5217	9.11909	25.0317	21.1438	34.2922	150.447	136.617	288.978	95.4996	121.368	211.541	157.41	124.97	203.955	3.54368e-15	2.19281e-13
Os11g0127800	3377.7	3606.11	3722.74	2322.36	3287.99	1848.14	2554.28	3909.37	3771.21	1180.96	1884.7	1365.78	1039.04	1327.53	1667.63	1209.42	1909.37	1055.58	3.76393e-15	2.3235e-13
Os05g0287800	275.264	291.647	283.178	290.183	255.436	272.559	272.22	235.92	304.922	1246.84	512.315	887.81	678.047	489.77	874.083	1660.28	600.265	677.255	4.02109e-15	2.4763e-13
Os09g0537700	4882.63	23329.5	17322	5342.94	11910	17609	3762.06	9658.25	8295.92	2553.67	1554.54	546.091	1868.93	907.577	1446.43	360.404	932.152	454.617	4.03259e-15	2.47744e-13
Os05g0111200	426.72	738.985	505.676	359.827	376.704	330.314	389.035	560.866	510.675	278.278	274.27	213.162	209.144	300.736	258.789	207.268	235.599	229.644	4.82275e-15	2.9558e-13
Os03g0223100	1111.87	578.908	566.357	625.01	518.613	554.238	424.497	635.426	371.653	196.663	223.556	142.841	236.839	215.885	126.71	63.3912	195.649	103.534	4.86901e-15	2.97705e-13
Os05g0380200	70.9196	30.6997	25.043	29.4648	24.0815	5.06616	35.4616	21.1438	9.26815	168.147	300.144	394.46	139.429	247.033	422.008	240.032	244.818	323.837	4.90243e-15	2.99037e-13
Os05g0195700	361.81	596.451	519.16	482.151	458.409	316.128	405.723	458.486	406.872	217.313	277.375	192.286	140.384	250.255	169.662	152.424	233.55	211.74	5.72449e-15	3.48353e-13
Os04g0524500	90.152	154.595	32.7485	78.5727	74.8248	51.6748	68.8373	27.8207	45.4139	873.184	315.669	544.992	371.493	207.293	519.725	594.738	223.307	331.622	6.20076e-15	3.76443e-13
Os12g0242500	294.497	399.096	446.921	310.719	322.521	251.282	198.168	423.988	288.239	145.531	74.5186	70.3216	142.294	111.702	96.6431	89.7448	76.8257	73.9532	6.44825e-15	3.90545e-13
Os03g0609500	1122.69	605.222	644.375	825.906	764.589	481.285	347.315	464.05	210.387	330.394	273.235	196.681	503.283	376.994	257.715	316.956	170.041	172.038	6.71085e-15	4.04541e-13
Os04g0127200	245.214	598.643	456.553	593.76	552.155	461.021	510.022	372.798	514.382	1958.76	1493.48	3305.11	1003.7	923.688	2244.27	1094.74	1267.11	1632.42	6.69817e-15	4.04541e-13
Os09g0535000	15478.5	19677.4	19672.2	11131.4	17825.5	13873.2	13684	17150.9	18050.7	9560.78	11144.7	10091.1	8077.36	11749.1	10130.3	9765.09	11798.4	8355.15	7.14962e-15	4.29982e-13
Os03g0255500	2306.69	2176.39	1399.52	2500.93	1754.51	1183.45	1436.2	1246.37	1286.42	4717.95	3361.62	5787.25	3806.61	4924.55	6376.3	4824.14	6004.7	5483.43	7.22062e-15	4.33237e-13
Os09g0346600	106.98	166.655	109.804	143.752	115.247	144.892	104.299	144.668	137.169	272.378	324.984	351.608	195.774	344.772	429.525	309.833	307.303	338.628	7.36564e-15	4.40908e-13
Os11g0567600	0	6.5785	3.85277	17.8574	13.7609	10.1323	20.8598	17.8053	18.5363	76.6986	91.0783	98.8897	36.2899	34.3698	133.153	143.877	70.6796	99.6421	8.40592e-15	5.02009e-13
Os03g0582000	865.459	1516.34	1381.22	1431.27	1213.54	1241.21	1135.81	1340.96	1254.91	600.806	558.889	404.349	578.728	642.286	381.203	595.45	523.439	351.083	8.58726e-15	5.11649e-13
Os01g0229600	3023.1	815.734	695.425	710.726	635.58	595.78	522.537	870.233	598.723	237.962	280.48	96.6922	235.884	292.143	181.474	145.301	219.209	110.541	9.25075e-15	5.49905e-13
Os01g0778800	328.153	418.831	552.872	417.864	514.313	609.966	577.816	382.813	653.405	1046.25	895.258	1186.68	875.731	769.024	966.431	933.774	766.208	892.109	9.95145e-15	5.90192e-13
Os08g0159500	3286.34	2744.33	3085.1	2253.61	2938.81	2160.21	2465.63	3117.04	3075.17	1166.21	1884.7	1467.96	1111.62	1489.72	1480.79	1041.33	1912.45	1300.8	9.97529e-15	5.90243e-13
Os01g0223900	25.2426	24.1212	12.5215	59.8224	40.4226	10.1323	37.5476	8.90264	19.4631	179.947	125.233	131.853	90.7246	76.258	79.4621	132.48	108.58	106.648	1.01897e-14	6.01544e-13
Os08g0174300	377.436	277.393	77.0554	195.539	89.4457	138.813	98.041	104.606	102.876	115.048	10.3498	8.7902	44.8848	21.4811	12.8857	4.27356	4.09737	2.33536	1.02591e-14	6.04254e-13
Os02g0625000	1446.04	2696.09	2415.69	2400.93	2716.05	2578.68	2421.82	2188.94	2447.72	3815.26	4039.53	4742.31	3561.18	5489.5	5115.64	4614.02	4523.5	5392.35	1.17791e-14	6.9219e-13
Os07g0616500	548.124	991.16	1047.95	791.977	885.856	726.487	772.855	1003.77	1040.81	403.159	493.686	358.201	419.243	530.584	458.518	394.592	523.439	407.91	1.20245e-14	7.05001e-13
Os01g0858900	310.123	135.956	129.068	195.539	130.728	147.932	186.695	115.734	124.193	450.358	253.57	395.559	402.053	437.141	489.658	401.003	322.668	337.849	1.28899e-14	7.54014e-13
Os01g0227500	1010.9	848.626	853.388	814.299	880.696	722.434	669.599	937.002	823.012	464.125	243.22	230.743	454.578	411.364	308.184	235.046	384.128	201.62	1.3106e-14	7.64917e-13
Os03g0729300	1799.43	1913.25	973.787	1255.38	1175.69	965.61	1104.53	1215.21	1166.86	2883.08	2427.03	3254.57	2383.67	3561.57	3815.26	3189.5	3667.15	2929.32	1.38849e-14	8.08537e-13
Os06g0651200	930.369	199.548	104.988	139.288	79.9851	72.9527	58.4074	113.509	64.8771	83.5818	9.31482	17.5804	19.0999	15.0368	8.5905	11.3962	14.3408	4.67073	1.40561e-14	8.16653e-13
Os04g0585700	299.305	271.911	358.307	241.968	252.856	412.385	463.087	470.727	455.066	130.781	149.037	141.742	164.259	97.7391	200.803	183.763	158.773	158.805	1.44377e-14	8.36932e-13
Os03g0412400	96.1622	15.3498	13.4847	14.2859	5.16033	28.3705	12.5159	8.90264	11.1218	229.113	87.9733	170.31	153.754	68.7396	158.924	148.15	96.2882	76.2885	1.47888e-14	8.55352e-13
Os03g0197100	703.186	448.434	755.142	400.006	687.184	421.504	600.762	949.244	861.938	117.015	221.486	145.038	157.574	161.108	297.446	82.6222	267.353	200.063	1.51049e-14	8.71673e-13
Os08g0397900	418.305	647.982	552.872	566.081	653.642	520.801	494.377	610.943	549.601	799.435	1000.83	830.674	721.977	854.949	789.252	745.737	903.47	725.519	1.54246e-14	8.88124e-13
Os05g0256500	85.3439	96.4846	83.7977	124.109	86.0055	62.8204	137.675	84.575	160.339	271.395	306.354	303.262	269.309	199.774	313.553	358.267	265.305	233.536	1.61632e-14	9.28571e-13
Os01g0274100	50.4851	27.4104	38.5277	28.5719	75.6848	28.3705	25.0317	43.4003	59.3162	8.84984	6.20988	3.29632	0	1.07406	2.14762	0.712261	6.14605	2.33536	1.65952e-14	9.51261e-13
Os04g0619400	304.113	197.355	155.074	158.931	116.107	123.614	116.815	142.442	177.022	609.656	287.725	377.978	572.043	250.255	396.237	648.157	339.057	303.597	1.67374e-14	9.57274e-13
Os01g0221600	150.253	412.253	108.841	194.646	282.098	122.601	131.417	92.3648	99.1692	423.809	483.336	485.658	510.923	825.949	645.361	373.937	782.598	549.589	1.76954e-14	1.00982e-12
Os01g0638600	64.9095	53.7244	154.111	23.2147	86.0055	54.7145	76.1382	166.924	178.875	3.93326	16.5597	17.5804	5.72998	20.4071	16.1072	18.5188	24.5842	9.34145	1.79419e-14	1.02161e-12
Os09g0268800	0	0	0	0	0	0	0	0	0	22.6163	16.5597	39.5559	23.8749	10.7406	15.0334	14.2452	6.14605	7.78454	1.93575e-14	1.09978e-12
Os04g0466600	939.985	777.359	795.597	800.906	638.161	621.111	636.223	786.77	686.77	490.674	349.823	364.793	339.024	440.363	379.056	339.748	405.64	347.969	1.94472e-14	1.10244e-12
Os02g0570400	100.97	15.3498	3.85277	36.6077	2.58016	25.3308	5.21494	4.45132	3.70726	577.206	189.401	1410.83	201.504	49.4066	490.732	82.6222	83.9961	432.821	2.02832e-14	1.14729e-12
Os03g0371350	179.102	225.862	373.718	343.756	288.118	304.983	196.082	290.448	247.46	77.6819	46.5741	23.0743	42.0198	68.7396	66.5764	32.764	89.1178	36.5873	2.03591e-14	1.14906e-12
Os10g0400100	646.691	787.227	765.738	800.013	843.714	800.453	778.07	718.888	813.744	1366.81	1036.02	1392.15	1174.65	1128.83	1213.41	1287.77	1228.19	1271.22	2.25067e-14	1.26748e-12
Os03g0748900	300.507	381.553	376.608	387.506	412.826	413.399	426.582	480.742	370.726	791.569	703.787	739.475	662.767	617.582	755.964	893.887	695.529	675.698	2.39387e-14	1.34518e-12
Os02g0703600	43.273	0	1.92638	3.57149	0	1.01323	4.17196	0	5.56089	60.9656	3.10494	2.19755	60.1648	3.22217	5.36906	210.829	4.09737	5.44918	2.45666e-14	1.37445e-12
Os09g0572000	0	0	3.85277	8.92871	1.72011	0	6.25793	0	5.56089	54.0824	26.9095	80.2105	51.5698	13.9627	40.8049	48.4337	29.7059	33.4735	2.45407e-14	1.37445e-12
Os06g0710300	2041.04	1339.82	946.818	1074.12	889.297	713.315	778.07	829.058	1150.18	2736.57	1886.77	2660.13	2126.78	2512.22	3272.98	3365.43	3015.66	3418.19	2.68161e-14	1.49704e-12
Os12g0431100	26.4446	0	26.9694	10.7145	27.5217	8.10586	20.8598	1.11283	6.48771	676.521	291.864	632.894	311.329	110.628	521.873	135.33	186.43	236.65	2.70567e-14	1.50719e-12
Os04g0468600	361.81	24.1212	21.1902	30.3576	36.1223	21.2779	50.0635	37.8362	40.7799	1726.7	792.795	907.588	748.717	158.96	860.124	524.936	445.589	408.688	2.71917e-14	1.51143e-12
Os10g0140700	200.739	668.814	430.547	475.008	590.858	377.936	445.356	437.342	606.137	72.7653	127.303	149.433	53.4798	141.775	234.091	72.6506	182.333	152.577	2.73493e-14	1.51691e-12
Os03g0309000	588.993	470.363	374.682	661.618	446.368	506.616	482.904	447.357	435.603	999.049	713.101	897.699	818.432	794.802	883.748	936.623	751.867	767.556	2.91044e-14	1.61078e-12
Os03g0764000	275.264	503.255	191.675	217.861	197.813	168.197	138.718	141.329	98.2424	608.672	700.682	947.144	543.393	1369.42	1171.53	277.782	906.543	929.474	3.1331e-14	1.73028e-12
Os01g0867300	373.83	252.176	226.35	417.864	208.133	197.58	228.415	174.714	169.607	612.606	406.747	460.387	453.623	375.92	399.458	468.668	371.836	451.503	3.38008e-14	1.86267e-12
Os12g0515400	4316.48	4563.29	4941.17	2658.08	4338.98	4087.38	3130.01	3899.35	4077.06	2279.33	2418.75	2296.44	2475.35	2636.81	2192.72	2152.45	2488.13	2284.76	3.43967e-14	1.89145e-12
Os02g0584700	233.193	49.3387	65.4971	44.6436	38.7025	41.5425	41.7196	66.7698	58.3893	563.44	178.017	120.865	469.858	110.628	188.991	483.625	165.943	203.955	3.51246e-14	1.92735e-12
Os01g0203000	239.203	191.873	249.467	234.825	223.614	189.474	374.433	264.853	360.531	514.274	377.768	470.276	479.408	308.254	488.585	676.648	365.69	476.414	3.53696e-14	1.93666e-12
Os09g0522200	288.486	5.48208	12.5215	36.6077	9.4606	13.172	17.7308	16.6924	59.3162	457.242	57.9589	51.6424	571.088	50.4806	70.8716	876.793	54.2902	65.3902	4.42936e-14	2.42013e-12
Os11g0559200	54.0912	134.859	133.884	92.8586	96.3261	102.336	117.858	115.734	157.559	234.029	271.165	381.275	157.574	196.552	225.501	158.834	209.99	230.422	4.48551e-14	2.4456e-12
Os03g0856500	16363.2	17617.2	9263.02	13159.1	12516.4	10573.1	8625.52	8130.33	9050.35	24780.5	21970.6	26683.7	18641.5	30797.5	31180.3	28093.7	28833.2	28145.8	4.58227e-14	2.49307e-12
Os05g0531000	1147.94	302.611	295.7	300.005	194.372	158.064	202.34	346.09	187.217	108.165	66.2387	37.3583	124.149	68.7396	120.267	123.933	34.8276	43.5934	4.82856e-14	2.62151e-12
Os04g0532400	4641.03	1133.69	1134.64	1471.45	1305.56	1180.42	1175.45	2042.04	1405.98	496.574	411.922	276.891	345.709	350.142	318.922	381.059	497.83	466.294	4.92805e-14	2.66988e-12
Os03g0655400	8908.22	14921.1	9468.18	9566.23	10569.2	5719.69	6925.45	11035.9	9347.86	4553.73	3277.78	2972.19	4019.58	5021.21	4992.15	4334.11	4816.46	3229.03	4.96881e-14	2.68629e-12
Os12g0278800	528.892	621.668	590.437	679.475	630.42	609.966	665.427	594.251	636.722	1154.41	902.503	1177.89	948.311	921.54	1171.53	1019.96	911.665	915.462	5.35108e-14	2.88689e-12
Os04g0591100	776.509	585.486	608.737	841.978	711.265	528.907	517.323	584.235	495.846	1440.56	916.993	1152.61	1549.96	1037.54	1127.5	1357.57	935.225	762.107	5.41628e-14	2.91593e-12
Os02g0759400	341.376	123.895	135.81	225.004	119.548	102.336	107.428	89.0264	219.655	2605.79	136.617	205.471	2218.46	206.219	285.634	9834.18	261.207	294.256	5.56971e-14	2.99226e-12
Os04g0590400	121.405	275.201	219.608	219.646	197.813	190.488	219.028	192.519	245.606	397.259	513.35	674.648	368.628	457.548	499.323	470.092	448.662	557.373	5.86817e-14	3.14603e-12
Os09g0397300	1792.22	1413.28	1306.09	2457.18	1832.78	1886.64	1796.03	870.233	1271.59	3319.67	2730.28	2250.29	4134.18	2907.47	2013.4	4096.21	1967.76	2583.69	5.88826e-14	3.15022e-12
Os09g0571200	264.446	20.8319	28.8958	66.9654	47.303	34.4499	34.4186	53.4158	46.3408	820.085	202.856	541.696	508.058	113.85	409.123	1060.56	242.769	264.674	5.94927e-14	3.17624e-12
Os11g0676500	21.6365	13.157	6.74234	12.5002	10.3207	6.07939	6.25793	8.90264	15.7559	67.8488	85.9034	125.26	47.7498	39.7401	113.824	78.3487	40.9737	72.3962	6.09461e-14	3.24709e-12
Os10g0483500	219.971	288.358	265.841	85.7157	221.034	136.786	201.297	227.017	245.606	96.3649	96.2532	63.7289	53.4798	92.3688	56.9121	37.7498	111.653	67.7255	6.18392e-14	3.28785e-12
Os03g0764100	354.598	220.38	246.577	268.754	272.637	215.818	237.801	331.623	416.14	1070.83	487.476	987.798	936.851	734.654	1026.56	1251.44	619.727	595.518	6.40738e-14	3.39962e-12
Os10g0417600	4381.39	3323.24	2311.66	2821.47	2412.45	2382.11	2056.77	2083.22	1966.7	6013.96	4562.19	5483.98	4371.02	4988.99	4536.86	5273.58	3948.84	4229.34	6.45427e-14	3.41744e-12
Os12g0441600	515.67	971.425	810.044	532.151	704.385	579.569	634.137	826.832	829.499	269.428	521.63	452.695	311.329	453.252	394.089	262.112	546.999	254.555	6.5637e-14	3.46823e-12
Os10g0527400	700.782	317.961	100.172	370.542	278.658	181.369	254.489	269.305	178.875	507.391	63.1338	46.1485	623.612	56.925	51.543	25.6414	4.09737	6.22763	7.10676e-14	3.74747e-12
Os05g0460000	1062.59	960.461	583.694	875.014	572.796	587.675	459.958	600.928	378.141	519.191	169.737	123.063	427.838	133.183	125.636	132.48	140.335	101.199	7.3771e-14	3.88205e-12
Os07g0105600	1449.64	1787.16	1904.23	1033.05	1418.23	996.007	1040.9	1608.04	1431	918.417	1060.85	877.921	776.412	1032.17	923.479	772.091	1019.22	787.017	7.4554e-14	3.91523e-12
Os10g0492900	3731.09	2976.77	1403.37	3202.73	1505.1	1122.66	907.4	1064.98	778.525	2002.03	529.91	320.842	588.278	484.399	428.451	706.563	277.597	222.638	7.94179e-14	4.16215e-12
Os02g0200900	3996.74	4422.94	4442.24	5636.7	4650.32	4817.92	4161.53	3174.9	3841.65	8975.7	5865.23	6383.88	8196.73	6804.15	6447.17	9795.72	6118.4	6336.62	8.40479e-14	4.39582e-12
Os06g0114400	204.345	107.449	69.3498	68.7511	112.667	53.7013	67.7943	109.057	78.7793	35.3994	21.7346	4.3951	14.3249	25.7773	8.5905	11.3962	14.3408	14.7906	8.79932e-14	4.59282e-12
Os02g0437300	494.033	556.98	456.553	831.263	497.972	363.75	505.85	378.362	521.797	1204.56	1312.36	1793.2	914.886	1235.16	1899.57	1883.93	1715.77	1841.04	9.20225e-14	4.79338e-12
Os02g0532500	1786.21	788.323	580.805	673.225	579.677	596.794	514.194	643.215	548.675	2744.43	1522.46	2995.26	2008.36	2449.92	2692.05	2180.94	2359.06	2065.24	1.05485e-13	5.48352e-12
Os09g0468150	16.8284	23.0247	34.6749	22.3218	18.9212	27.3573	16.6878	11.1283	12.9754	70.7987	56.9239	78.013	40.1098	42.9622	74.0931	96.8675	66.5823	66.1686	1.08278e-13	5.61734e-12
Os03g0595300	2684.13	3232.24	2490.81	1645.56	2435.67	1234.12	1629.15	2231.22	2013.04	1281.26	1636.3	1246.01	991.286	1517.64	1412.06	1003.58	1272.23	951.271	1.10884e-13	5.74092e-12
Os01g0216000	9.61622	1.09642	0.963192	0.892871	4.30027	2.02646	4.17196	15.5796	9.26815	29.4995	80.7285	152.73	28.6499	36.5179	50.4692	69.0893	67.6066	101.199	1.1262e-13	5.81907e-12
Os08g0428400	503.649	1042.69	887.1	825.906	1014	1016.27	1075.32	854.653	963.888	1625.42	1815.36	2426.09	1836.46	1855.97	1964	1799.88	1889.91	1932.12	1.14839e-13	5.92181e-12
Os04g0647800	649.095	912.218	516.271	889.3	639.021	559.304	603.891	496.322	655.258	1977.45	1264.75	1807.48	1690.34	1175.02	1504.41	1676.66	1213.85	1340.5	1.16429e-13	5.99176e-12
Os04g0173300	433.932	794.902	665.566	865.192	706.965	655.561	711.318	457.373	643.21	1427.77	1968.53	1929.45	1743.82	2145.96	1240.25	2219.4	1589.78	1650.32	1.21375e-13	6.23382e-12
Os08g0465800	4276.81	2881.38	1979.36	1942.89	2083.91	1680.95	1705.29	2297.99	2095.53	1215.38	1169.53	848.254	960.726	1059.02	1140.39	1032.78	1126.78	853.964	1.28664e-13	6.595e-12
Os03g0195300	391.861	145.823	246.577	127.681	152.23	230.004	160.62	200.309	177.948	24.5829	60.0289	34.062	42.0198	65.5174	27.9191	47.0092	47.1198	26.4674	1.28987e-13	6.5984e-12
Os05g0500200	252.426	274.104	99.2088	288.397	113.527	158.064	85.5251	71.2211	56.5357	53.099	36.2243	50.5436	19.0999	51.5547	21.4762	25.6414	12.2921	14.0122	1.39412e-13	7.11749e-12
Os03g0122300	376.234	111.834	69.3498	248.218	45.5829	126.654	93.869	75.6724	72.2916	962.666	456.426	483.461	406.828	248.107	384.425	492.884	261.207	233.536	1.53229e-13	7.80739e-12
Os08g0485800	20.4345	10.9642	5.77915	8.92871	17.2011	4.05293	10.4299	4.45132	9.26815	83.5818	146.967	193.384	50.6148	19.333	67.6502	86.1835	158.773	112.876	1.54854e-13	7.87454e-12
Os05g0149400	56.4953	93.1954	34.6749	22.3218	91.1658	38.5028	75.0952	62.3184	90.8279	327.444	280.48	413.139	263.579	179.367	302.815	230.772	309.351	250.662	1.68563e-13	8.55473e-12
Os04g0111200	1772.99	1163.3	1558.44	990.194	1152.47	1193.59	1187.96	1744.92	1613.59	617.522	674.807	718.599	612.152	659.471	795.695	692.317	720.113	538.69	1.7582e-13	8.90544e-12
Os01g0660200	161.072	225.862	47.1964	57.1438	82.5652	33.4367	112.643	44.5132	40.7799	1732.6	673.772	1242.71	484.183	223.404	966.431	450.149	489.636	503.66	1.82377e-13	9.21937e-12
Os06g0655100	272.86	704.996	717.578	714.297	643.321	760.937	747.823	706.647	794.281	1417.94	1446.9	1686.62	1255.82	1872.08	1892.06	1355.43	1836.65	1498.52	1.84392e-13	9.30292e-12
Os02g0540700	379.841	63.5922	42.3804	108.037	46.443	57.7542	88.6541	43.4003	97.3156	696.187	42.4342	40.6547	758.267	64.4434	49.3954	3174.55	57.3632	69.2824	1.88481e-13	9.49059e-12
Os03g0261100	628.66	1352.98	1413.97	691.083	1198.92	723.448	783.285	1583.56	1341.1	314.661	439.867	329.632	443.118	375.92	368.318	433.055	536.755	265.453	1.90842e-13	9.59063e-12
Os01g0928800	423.114	396.903	340.97	428.578	399.065	288.771	365.046	274.869	332.727	828.935	668.597	905.39	588.278	655.174	951.398	844.029	704.748	788.574	2.14103e-13	1.07386e-11
Os01g0246700	497.639	435.277	281.252	936.622	293.279	313.089	201.297	201.422	206.68	2712.97	471.951	1096.58	1457.32	590.731	1073.81	2292.77	535.731	508.331	2.31809e-13	1.1604e-11
Os04g0452700	431.528	129.377	57.7915	191.967	123.848	115.508	94.912	84.575	65.8039	715.854	505.07	724.092	556.763	445.733	642.14	552.002	532.658	447.611	2.42602e-13	1.21206e-11
Os03g0604566	1578.26	582.197	243.688	650.903	339.722	290.798	119.944	252.612	102.876	259.595	40.3642	65.9265	125.104	71.9618	76.2407	67.6648	47.1198	33.4735	2.60035e-13	1.29664e-11
Os06g0239100	31.2527	29.6032	9.63192	6.2501	15.481	8.10586	10.4299	11.1283	3.70726	198.63	41.3992	71.4203	160.439	68.7396	63.3549	118.235	38.925	15.5691	2.65101e-13	1.31934e-11
Os12g0115500	8673.83	4823.14	6159.61	4432.21	4030.22	3629.4	5694.72	8132.56	6540.53	2465.17	2773.75	2205.24	2524.05	1973.04	2417.15	2771.41	3730.66	2774.41	2.69266e-13	1.33748e-11
Os11g0670900	375.032	237.922	210.939	138.395	98.9063	82.0718	101.17	173.601	155.705	89.4817	32.0844	26.3706	19.0999	35.4439	27.9191	9.25939	30.7303	17.126	2.77071e-13	1.37359e-11
Os09g0436000	1209.24	1256.49	763.811	1666.99	1042.39	924.068	853.165	728.903	688.624	2101.35	1796.73	2248.09	1876.57	2027.82	2155.14	2304.88	1837.67	1890.09	2.84626e-13	1.40832e-11
Os07g0178800	1700.87	939.629	446.921	252.683	190.932	462.034	281.607	647.667	482.871	105.215	72.4486	37.3583	59.2098	127.813	95.5693	22.7923	99.3612	42.0365	3.03075e-13	1.49672e-11
Os01g0750500	158.668	57.0137	75.129	66.9654	80.8451	74.9792	89.6971	37.8362	77.8525	248.779	257.71	332.929	279.814	241.663	188.991	277.069	257.11	200.063	3.0927e-13	1.52439e-11
Os02g0132500	1340.26	1146.85	989.198	1450.02	1216.98	1068.96	1279.75	1482.29	948.132	2372.74	2670.25	3058.99	1993.08	3249.02	3372.84	2316.27	3651.78	3278.85	3.20463e-13	1.57653e-11
Os05g0394900	426.72	637.018	400.688	376.792	429.167	305.996	276.392	359.444	411.506	201.58	164.562	196.681	126.059	193.33	187.917	168.806	215.112	135.451	3.21199e-13	1.57713e-11
Os04g0458300	320.941	162.27	95.356	151.788	117.827	120.575	92.826	119.073	82.4865	589.989	298.074	421.929	526.203	350.142	455.296	297.013	323.692	274.794	3.41829e-13	1.67522e-11
Os08g0509100	252.426	249.983	100.172	87.5014	161.69	81.0586	123.073	64.5441	75.9988	1717.85	669.632	1734.97	636.027	175.071	992.203	908.132	443.54	626.656	3.49191e-13	1.70804e-11
Os01g0826000	425.518	114.027	88.6137	144.645	60.2038	61.8071	50.0635	91.252	70.4379	41.2992	27.9445	23.0743	34.3799	20.4071	10.7381	9.97165	6.14605	14.7906	3.60491e-13	1.75997e-11
Os06g0120200	336.568	456.109	490.265	192.86	437.768	273.573	341.057	490.758	333.653	84.5651	186.296	101.087	209.144	163.257	172.884	77.6364	224.331	85.63	3.69405e-13	1.79665e-11
Os08g0203600	421.911	1226.89	983.419	931.265	875.536	703.183	956.421	667.698	1186.32	2004.98	2210.72	3431.47	1543.27	2323.18	3723.98	2762.15	3567.78	3322.44	3.68941e-13	1.79665e-11
Os06g0557100	241.607	421.024	278.362	488.401	331.121	363.75	330.628	229.243	386.482	1927.3	596.149	1356.99	1088.7	626.175	1078.11	1591.9	835.863	839.952	3.728e-13	1.80974e-11
Os01g0134700	9.61622	39.471	51.0492	24.1075	26.6617	28.3705	17.7308	17.8053	19.4631	624.405	149.037	308.756	317.059	60.1471	223.353	272.796	95.2638	83.2946	3.73802e-13	1.81118e-11
Os06g0194000	2758.65	3273.9	3221.88	2585.76	2573.28	2891.76	3506.53	3684.58	4026.08	3648.1	4558.05	5499.37	3701.56	3696.9	4202.9	4547.78	4971.13	5168.16	3.88322e-13	1.87799e-11
Os02g0314300	199.536	1558.01	1588.3	1256.27	1493.05	984.861	1166.06	1021.58	1621.93	159.297	164.562	82.4081	88.8146	144.998	154.629	224.362	161.846	45.9288	4.0169e-13	1.93899e-11
Os07g0225300	250.022	101.967	57.7915	88.3943	80.8451	124.628	95.955	75.6724	103.803	535.907	223.556	318.645	560.583	302.884	351.137	422.371	190.528	168.146	4.23657e-13	2.04119e-11
Os01g0113200	14.4243	17.5427	23.1166	19.6432	14.6209	20.2646	12.5159	4.45132	3.70726	165.197	54.854	43.951	85.9496	30.0736	21.4762	123.933	45.0711	26.4674	4.55997e-13	2.19288e-11
Os01g0668000	758.479	665.525	512.418	524.116	610.639	400.227	514.194	534.158	551.455	386.443	319.809	308.756	336.159	338.328	310.332	349.008	323.692	291.142	4.73177e-13	2.27125e-11
Os03g0137200	512.064	436.374	475.817	434.828	466.15	538.026	548.612	418.424	519.016	791.569	823.844	785.624	780.232	671.285	810.728	1053.43	736.502	804.143	4.75052e-13	2.276e-11
Os11g0626700	939.985	327.829	312.074	490.186	621.82	342.472	591.375	307.141	305.849	1788.65	1573.17	1476.75	1163.19	793.728	1781.45	2316.27	2472.76	1998.29	4.83402e-13	2.31169e-11
Os11g0549469	0	0	0	0	1.72011	1.01323	0	2.22566	0	14.7497	12.4198	25.2718	13.3699	12.8887	25.7715	20.6556	21.5112	16.3475	5.25983e-13	2.51064e-11
Os04g0513400	286.082	570.137	363.123	594.652	367.243	234.057	282.65	338.3	346.629	163.23	26.9095	31.8645	48.7048	28.9995	61.2073	94.0184	32.779	52.1564	5.28355e-13	2.51728e-11
Os09g0294000	12757.1	21178.4	18501	13738.6	17390.3	12197.3	13654.8	13927.1	21353.8	5627.51	5612.7	2765.62	3771.28	7611.84	3320.23	8215.22	7971.43	5038.93	5.58288e-13	2.65497e-11
Os03g0764900	27.6466	38.3746	15.4111	70.5368	17.2011	10.1323	57.3644	20.0309	25.9508	9.83315	2.06996	2.19755	1.90999	0	0	8.54713	4.09737	6.22763	6.03856e-13	2.86636e-11
Os11g0586300	141.839	239.019	171.448	149.11	147.929	174.276	119.944	173.601	139.022	74.732	67.2737	50.5436	77.3547	59.0731	73.0192	39.8866	77.85	55.2703	6.22416e-13	2.94901e-11
Os08g0480000	807.762	599.74	344.823	529.473	536.674	407.319	278.478	540.835	413.36	292.045	135.582	112.075	244.479	322.217	148.186	123.221	102.434	90.3007	6.2888e-13	2.97415e-11
Os03g0729100	2950.98	4694.86	5092.4	2737.54	3920.99	3391.29	3259.34	4156.42	4491.35	2145.59	1969.57	1976.7	1761.01	2402.66	2597.55	2006.44	2732.95	2005.3	6.44765e-13	3.04367e-11
Os08g0374000	435.134	124.991	466.185	238.397	203.833	274.586	259.704	513.014	595.942	60.9656	65.2038	34.062	66.8497	53.7028	110.603	44.1602	97.3125	63.0548	6.65496e-13	3.13577e-11
Os06g0335900	7.21216	7.67491	1.92638	16.0717	5.16033	5.06616	6.25793	2.22566	1.85363	35.3994	62.0988	53.84	38.1998	35.4439	42.9525	93.3062	24.5842	56.8272	7.08262e-13	3.33117e-11
Os02g0240100	0	18.6391	5.77915	14.2859	5.16033	6.07939	7.30092	6.67698	3.70726	125.864	39.3293	383.472	99.3196	65.5174	185.77	138.179	114.726	182.158	7.32436e-13	3.43857e-11
Os03g0660400	0	0	0	0	0	0	0	0	0	29.4995	3.10494	25.2718	28.6499	10.7406	13.9596	79.0609	3.07303	13.2337	7.35384e-13	3.4461e-11
Os11g0609500	0	0	0	0	0	0	0	0	0	17.6997	12.4198	41.7534	9.54996	4.29622	38.6572	24.9291	8.19474	14.0122	7.43247e-13	3.47661e-11
Os11g0210201	294.497	76.7491	26.0062	55.358	30.962	18.2382	18.7738	4.45132	11.1218	244.846	36.2243	74.7167	179.539	49.4066	60.1335	101.853	22.5355	31.1382	8.15566e-13	3.80795e-11
Os03g0691800	52.8892	121.702	73.2026	83.037	57.6237	65.8601	50.0635	64.5441	79.7061	284.178	180.087	299.965	155.664	144.998	282.413	227.211	234.574	243.656	8.30041e-13	3.8685e-11
Os03g0805400	115.395	160.077	252.356	219.646	183.192	212.779	232.587	238.145	234.484	689.304	417.097	595.536	524.293	405.993	477.847	712.261	426.126	397.79	8.40358e-13	3.90949e-11
Os11g0204800	638.276	831.084	822.566	695.547	681.163	595.78	518.366	564.205	744.232	306.794	351.893	427.423	406.828	447.881	435.968	346.871	439.443	368.209	8.705e-13	4.04239e-11
Os05g0495600	64.9095	312.479	163.743	240.182	236.515	145.905	132.46	100.155	159.412	897.767	490.581	860.34	498.508	709.951	985.76	1186.63	861.472	836.06	8.74127e-13	4.05191e-11
Os12g0617400	67.3135	47.1459	31.7853	18.7503	19.7813	10.1323	12.5159	30.0464	17.6095	5.89989	4.13992	1.09877	1.90999	4.29622	4.29525	2.13678	0	0	8.89036e-13	4.1136e-11
Os11g0543500	738.045	1475.78	1191.47	727.69	1143.87	707.236	734.264	918.084	1038.03	399.226	647.898	393.361	319.924	649.804	496.101	352.569	684.261	256.89	8.96651e-13	4.14137e-11
Os04g0679400	2783.89	399.096	384.314	894.657	567.636	565.383	474.56	393.942	341.995	2643.15	2115.5	2477.74	3128.57	2658.29	2018.77	3445.92	2168.53	2466.92	9.26395e-13	4.27106e-11
Os02g0743500	697.176	967.039	1026.76	1042.87	1003.68	907.856	1050.29	832.396	1078.81	1574.29	1600.08	1638.27	1566.19	1649.75	1686.96	1693.04	1584.66	1629.3	9.55497e-13	4.39734e-11
Os05g0116100	3947.46	2045.91	1532.44	1125.91	1311.58	1793.42	1239.07	1956.35	1376.32	707.987	730.696	528.511	604.513	618.656	632.476	563.398	645.336	523.121	1.0002e-12	4.59482e-11
Os01g0674800	709.196	505.448	446.921	483.043	492.811	489.391	560.085	610.943	505.114	879.084	999.791	1105.37	822.252	973.095	934.217	994.316	1053.02	1018.22	1.02473e-12	4.69912e-11
Os07g0678600	1014.51	1219.22	1122.12	1283.95	1206.66	1265.53	1345.46	1364.33	1209.49	2253.76	1704.61	2395.33	1852.69	1749.64	2276.48	2063.42	1784.4	2291.77	1.03409e-12	4.73361e-11
Os01g0916100	3.60608	5.48208	3.85277	0.892871	28.3818	8.10586	13.5589	21.1438	0	272.378	291.864	347.213	189.089	71.9618	220.132	138.891	115.751	114.433	1.06454e-12	4.86431e-11
Os10g0173000	604.62	267.526	194.565	254.468	166.851	158.064	104.299	164.699	115.852	169.13	31.0494	30.7657	52.5248	25.7773	25.7715	48.4337	49.1684	11.6768	1.08815e-12	4.94795e-11
Os10g0465700	1904.01	1433.02	561.541	616.081	620.959	319.168	306.639	668.81	353.117	323.511	261.85	210.965	134.654	213.737	205.098	147.438	255.061	154.134	1.08863e-12	4.94795e-11
Os02g0651900	790.934	447.338	275.473	379.47	265.757	249.255	144.975	311.592	197.412	95.3816	66.2387	39.5559	87.8596	92.3688	162.146	89.0326	81.9474	58.3841	1.08538e-12	4.94795e-11
Os08g0539700	12.0203	121.702	111.73	134.824	148.789	176.302	171.05	65.6569	94.5351	467.075	413.992	886.711	583.503	893.615	823.614	1024.23	806.158	804.922	1.11454e-12	5.05679e-11
Os03g0657400	0	6.5785	10.5951	8.03584	6.88044	8.10586	8.34391	11.1283	18.5363	64.8988	25.8745	75.8154	26.7399	34.3698	70.8716	35.613	50.1928	52.1564	1.14012e-12	5.16373e-11
Os02g0827900	248.82	380.456	320.743	388.399	294.139	281.678	295.166	129.088	193.704	897.767	529.91	1029.55	569.178	548.843	1025.49	990.755	702.699	750.43	1.24467e-12	5.62731e-11
Os08g0155900	718.812	120.606	71.2762	194.646	98.0462	56.741	103.256	75.6724	75.9988	259.595	10.3498	35.1608	308.464	36.5179	23.6239	18.5188	0	3.11382	1.37001e-12	6.1831e-11
Os02g0274700	381.043	310.286	329.412	364.292	367.243	312.075	300.381	283.772	306.776	740.437	455.391	614.215	523.338	469.363	645.361	651.719	588.997	558.93	1.49414e-12	6.73149e-11
Os04g0534000	1503.74	3065.58	2396.42	2060.75	2616.29	2294.97	1849.22	2685.26	2352.26	1232.09	1304.08	1103.17	1271.1	1440.31	1328.31	1178.08	1404.37	866.42	1.53424e-12	6.90006e-11
Os01g0717400	397.871	611.8	1291.64	458.043	641.601	922.041	998.14	1398.83	1309.59	202.563	311.529	185.693	343.799	360.883	332.882	205.131	418.956	199.284	1.64537e-12	7.38692e-11
Os11g0247000	275.264	60.3029	104.025	98.2159	110.087	128.68	172.093	144.668	155.705	392.343	561.994	675.746	440.253	446.807	372.613	580.492	578.753	653.902	1.76886e-12	7.92746e-11
Os01g0232000	114.193	370.589	137.736	110.716	169.431	49.6484	75.0952	103.493	122.34	30.4828	49.6791	28.5681	21.9649	47.2585	28.9929	22.7923	112.678	24.1321	1.7897e-12	8.00689e-11
Os03g0572250	445.952	365.107	173.375	219.646	245.116	208.726	141.847	174.714	142.73	137.664	122.128	67.0252	140.384	136.405	103.086	60.5422	79.8987	62.2763	1.88312e-12	8.4102e-11
Os08g0247600	139.435	257.658	561.541	272.326	614.939	217.845	416.153	579.784	557.943	58.9989	128.338	195.582	55.3898	111.702	201.877	47.0092	141.359	88.7438	2.0752e-12	9.25194e-11
Os03g0815100	1473.69	301.515	247.54	482.151	307.04	498.51	277.435	283.772	511.602	2854.56	1090.87	1664.64	2645.34	2190	1689.11	3628.26	1123.7	1026.78	2.09278e-12	9.31414e-11
Os01g0217500	81.7378	10.9642	26.0062	54.4652	25.8016	20.2646	47.9775	4.45132	25.9508	185.847	153.177	169.211	252.119	93.4429	133.153	147.438	149.554	93.4145	2.12316e-12	9.41879e-11
Os03g0128800	1835.5	2962.52	2417.61	1522.35	2281.73	1677.91	1599.95	2514.99	2339.28	1197.68	1612.5	1459.17	999.881	1845.23	1700.92	1336.91	2401.06	1447.92	2.12363e-12	9.41879e-11
Os08g0425500	96.1622	121.702	100.172	56.2509	61.9239	74.9792	71.9662	107.944	111.218	45.2325	38.2943	26.3706	48.7048	46.1844	40.8049	27.7782	16.3895	24.9105	2.19242e-12	9.70714e-11
Os05g0307100	316.133	349.757	482.559	324.112	454.969	433.663	469.345	480.742	534.772	172.08	245.29	178.001	225.379	242.737	154.629	183.051	226.38	151.02	2.21121e-12	9.77349e-11
Os03g0244700	57.6973	24.1212	41.4173	43.7507	23.2215	65.8601	69.8803	74.5596	65.8039	176.013	184.227	162.619	152.799	100.961	118.119	189.461	81.9474	147.128	2.30838e-12	1.01854e-10
Os07g0171100	7500.65	10176.9	9793.74	6234.03	8726.11	7291.22	7493.88	9907.52	9719.51	4759.25	5989.43	5108.2	3937.45	6682.78	6269.99	5189.53	7735.83	4775.82	2.33616e-12	1.02903e-10
Os01g0899200	526.488	277.393	401.651	329.47	304.459	266.48	207.555	392.829	293.8	128.814	116.953	95.5934	134.654	61.2212	133.153	30.6272	71.704	70.0609	2.37418e-12	1.04399e-10
Os01g0597800	84.1419	60.3029	15.4111	41.0721	8.60055	26.344	25.0317	11.1283	16.6827	300.895	53.819	203.273	249.254	90.2207	94.4955	124.646	44.0467	57.6056	2.42447e-12	1.06302e-10
Os10g0491450	13.2223	0	1.92638	0	0	0	2.08598	0	0.926815	39.3326	20.6996	102.186	34.3799	7.51839	75.1669	39.8866	43.0224	34.252	2.42574e-12	1.06302e-10
Os09g0355400	427.922	628.247	881.321	562.509	669.123	413.399	1044.03	630.974	1114.03	1904.68	1717.03	2451.37	1495.52	1210.46	2804.8	1945.9	1997.47	1767.09	2.63824e-12	1.15417e-10
Os03g0848700	225.981	485.712	568.283	491.972	466.15	368.816	628.922	320.495	634.868	878.101	1446.9	1667.94	995.106	1240.53	1402.4	1152.44	1603.1	1665.11	2.7841e-12	1.21591e-10
Os01g0878000	965.228	512.026	438.252	317.862	390.465	383.002	405.723	477.404	462.481	171.097	228.731	190.088	211.054	225.552	164.293	210.117	229.453	179.823	2.93654e-12	1.28031e-10
Os06g0699400	939.985	1133.69	860.13	915.193	1106.89	864.287	899.057	820.155	1053.79	1956.8	1595.94	1880	1486.93	1714.19	1923.2	1988.63	1555.98	1749.97	3.0536e-12	1.32909e-10
Os05g0324700	36.0608	0	0	18.7503	5.16033	6.07939	0	0	1.85363	157.33	47.6091	149.433	130.834	49.4066	153.555	135.33	67.6066	49.8211	3.10794e-12	1.35046e-10
Os04g0430200	388.255	415.542	476.78	308.041	370.684	318.155	454.743	444.019	445.798	222.229	230.801	197.779	258.804	220.182	236.239	187.325	279.645	174.374	3.32681e-12	1.44311e-10
Os02g0625300	2246.59	1349.69	1736.64	999.123	1468.97	1412.45	1612.46	1601.36	1603.39	811.235	670.667	479.066	881.461	500.51	478.92	896.024	707.821	727.076	3.35215e-12	1.45166e-10
Os11g0207200	1358.29	1788.26	1885.93	2148.25	1724.41	1434.74	1760.57	1432.21	1868.46	4825.13	2985.92	3657.82	3403.61	3179.21	3756.2	5783.56	2986.98	3262.5	3.373e-12	1.45822e-10
Os04g0560700	619.044	560.269	394.909	499.115	444.648	409.346	447.442	432.891	350.336	997.082	786.585	866.933	808.882	640.137	729.119	792.034	565.437	696.717	3.56936e-12	1.54052e-10
Os05g0540000	319.739	425.41	394.909	449.114	440.348	565.383	568.429	460.711	551.455	1135.73	677.912	916.378	1039.04	833.468	729.119	1291.33	826.644	931.81	3.63151e-12	1.56472e-10
Os05g0202800	1449.64	42.7602	885.173	268.754	877.256	231.017	673.771	1855.09	1081.59	41.2992	6.20988	14.2841	43.9298	27.9255	82.6836	40.5989	6.14605	31.1382	3.71066e-12	1.59614e-10
Os06g0289900	7041.47	2371.55	5808.05	2432.18	3251.87	4285.97	5206.6	6244.09	6391.32	773.869	1741.87	716.401	1016.12	1190.05	1108.17	965.113	1990.3	867.976	3.7225e-12	1.59856e-10
Os01g0962100	2101.14	479.134	158.927	576.795	239.955	245.202	133.503	133.54	103.803	240.912	110.743	86.8032	148.979	118.146	85.905	128.919	73.7527	52.1564	4.06517e-12	1.7428e-10
Os02g0282000	28.8486	17.5427	19.2638	17.8574	15.481	4.05293	18.7738	4.45132	5.56089	161.264	47.6091	124.162	74.4897	36.5179	85.905	54.8441	25.6086	67.7255	4.20163e-12	1.7983e-10
Os02g0221100	8.41419	1.09642	5.77915	14.2859	18.9212	25.3308	9.3869	2.22566	14.829	53.099	28.9795	74.7167	36.2899	23.6292	48.3216	47.7215	20.4868	30.3597	4.24501e-12	1.81384e-10
Os05g0343400	2621.62	2426.37	1842.59	2808.97	1944.58	1834.96	1717.8	1759.38	2406.01	6689.5	2728.21	4944.49	5977.32	4444.44	5651.47	6624.02	4006.2	3594.12	4.36559e-12	1.86227e-10
Os12g0123200	102.172	97.5811	76.0922	119.645	107.507	70.9262	95.955	71.2211	91.7547	212.396	226.661	286.78	160.439	211.589	344.694	278.494	228.428	300.483	4.4948e-12	1.9142e-10
Os03g0400800	0	10.9642	11.5583	10.7145	10.3207	2.02646	18.7738	10.0155	14.829	31.4661	64.1688	82.4081	55.3898	68.7396	73.0192	76.2119	73.7527	96.5283	4.6187e-12	1.96371e-10
Os12g0637100	340.174	395.806	384.314	270.54	363.803	274.586	286.822	327.172	391.116	774.853	574.414	896.6	549.123	508.029	818.245	734.341	617.678	668.692	4.66093e-12	1.97839e-10
Os05g0507300	895.51	734.599	676.161	752.691	630.42	583.622	713.404	663.246	722.916	2727.72	1271.99	2522.79	1698.94	890.393	2372.05	1464.41	1498.61	1465.83	4.75386e-12	2.01451e-10
Os02g0759900	3658.97	2465.84	2479.26	1320.56	1859.44	1550.24	1401.78	2274.62	2102.02	1118.03	1194.37	871.328	912.976	1217.98	1031.93	893.887	1145.21	947.379	4.83756e-12	2.0466e-10
Os01g0946700	0	1.09642	1.92638	3.57149	6.88044	4.05293	0	1.11283	0	32.4494	108.673	65.9265	13.3699	6.44434	17.181	2.84904	10.2434	20.2398	4.85625e-12	2.05113e-10
Os07g0646100	221.173	265.333	256.209	303.576	231.355	254.321	343.143	338.3	366.092	159.297	164.562	171.409	153.754	142.849	162.146	123.221	183.357	168.146	5.2534e-12	2.21523e-10
Os12g0628600	494.033	332.214	202.27	302.683	307.04	63.8336	117.858	115.734	144.583	3853.61	1641.48	5001.62	1210.94	428.548	3175.26	641.747	1480.17	2665.43	5.41826e-12	2.281e-10
Os12g0594000	204.345	70.1706	59.7179	108.93	118.688	125.641	95.955	148.006	113.071	42.2826	39.3293	24.173	30.5599	23.6292	17.181	28.4904	41.998	15.5691	5.71696e-12	2.40281e-10
Os05g0181300	20.4345	2.19283	1.92638	7.14297	1.72011	6.07939	3.12897	4.45132	7.41452	48.1825	17.5947	28.5681	78.3097	11.8146	12.8857	111.113	29.7059	28.0244	6.25015e-12	2.62261e-10
Os01g0122000	455.568	294.936	238.872	318.755	195.232	222.911	182.523	253.725	162.193	45.2325	115.918	40.6547	100.275	147.146	62.2811	45.5847	118.824	29.5813	6.29333e-12	2.63642e-10
Os10g0127900	84.1419	87.7133	77.0554	261.611	144.489	104.363	125.159	73.4467	82.4865	282.212	397.432	385.67	386.773	532.732	369.391	717.959	176.187	382.221	6.33506e-12	2.64958e-10
Os06g0204400	455.568	654.561	580.805	576.795	561.616	588.688	638.309	530.82	559.796	370.71	320.844	246.125	271.219	338.328	252.346	342.597	301.157	311.382	6.36859e-12	2.65927e-10
Os01g0704300	1325.84	743.37	763.811	856.264	915.098	756.884	547.569	745.596	610.771	1219.31	1481.06	1427.31	1794.44	2041.78	2126.15	1435.21	1901.18	1405.11	6.43447e-12	2.68242e-10
Os02g0251900	0	0	0	0	0	0	0	0	1.85363	96.3649	8.27984	10.9877	53.4798	2.14811	10.7381	190.174	10.2434	1.55691	6.55122e-12	2.72667e-10
Os02g0669366	46.8791	8.77133	3.85277	16.0717	18.9212	12.1588	13.5589	5.56415	14.829	151.431	39.3293	102.186	210.099	37.592	105.234	128.919	85.0204	46.7073	6.79822e-12	2.82489e-10
Os07g0587500	182.708	98.6775	129.068	149.11	125.568	148.945	137.675	142.442	125.12	373.66	180.087	281.286	272.174	238.44	358.653	440.177	360.569	281.022	7.32817e-12	3.04019e-10
Os10g0209700	3649.35	1700.54	1818.51	1346.45	1312.44	1204.73	1375.7	2263.5	1801.73	532.957	509.21	621.906	469.858	675.581	802.138	673.799	976.198	626.656	7.43665e-12	3.08021e-10
Os09g0471100	134.627	64.6886	157.963	84.8228	53.3234	91.1909	134.546	104.606	105.657	218.296	119.023	243.928	169.034	144.998	318.922	294.876	233.55	260.004	7.57129e-12	3.13093e-10
Os07g0417200	0	0	0	0	0	0	0	0	0	25.5662	8.27984	47.2473	7.63997	2.14811	17.181	5.69809	13.3165	32.6951	7.69356e-12	3.17638e-10
Os03g0148700	233.193	158.98	165.669	222.325	173.731	126.654	165.835	183.617	221.509	509.357	301.179	434.016	355.259	292.143	355.432	628.214	342.13	346.412	7.81664e-12	3.22201e-10
Os07g0686300	176.698	43.8567	48.1596	120.538	43.8628	60.7939	60.4934	35.6105	21.3167	237.962	358.103	603.227	205.324	324.365	548.718	377.498	557.242	505.995	7.84895e-12	3.23015e-10
Os11g0482200	2.40405	4.38567	0	5.35723	1.72011	0	0	0	0	63.9155	28.9795	64.8277	23.8749	11.8146	67.6502	37.7498	39.9494	31.9166	7.97159e-12	3.27537e-10
Os08g0192300	43.273	41.6638	54.9019	45.5364	70.5245	14.1852	49.0205	106.832	56.5357	12.7831	2.06996	2.19755	6.68497	7.51839	5.36906	8.54713	5.12171	4.67073	8.13359e-12	3.33659e-10
Os03g0371400	1544.6	222.573	444.031	379.47	379.284	339.433	222.157	489.645	348.482	77.6819	37.2593	13.1853	71.6247	66.5915	70.8716	43.4479	105.507	14.7906	8.18293e-12	3.35148e-10
Os03g0305600	1317.42	66.8814	53.9387	419.65	29.2419	51.6748	47.9775	10.0155	22.2436	176.997	10.3498	0	8.59496	8.59245	4.29525	4.98582	3.07303	3.11382	8.6214e-12	3.52544e-10
Os05g0398000	163.476	140.341	133.884	181.253	162.55	158.064	243.016	189.181	200.192	382.51	511.28	448.3	445.983	392.031	220.132	485.762	251.988	366.652	9.16703e-12	3.7426e-10
Os03g0718800	484.417	416.638	133.884	362.506	111.807	151.985	84.4821	80.1237	57.4625	176.013	32.0844	21.9755	97.4096	74.1099	30.0667	46.2969	32.779	13.2337	9.26389e-12	3.77614e-10
Os02g0712600	9.61622	0	0	10.7145	1.72011	0	2.08598	5.56415	3.70726	113.081	30.0144	127.458	79.2647	24.7033	47.2477	103.99	47.1198	37.3658	9.3185e-12	3.79238e-10
Os07g0683200	542.114	211.608	140.626	974.123	184.052	157.051	153.319	153.57	91.7547	1251.76	1054.65	1259.2	993.196	819.505	874.083	1079.79	417.932	643.782	9.61403e-12	3.90646e-10
Os10g0190500	183.91	194.066	141.589	115.18	175.451	98.2835	111.6	155.796	151.998	90.465	60.0289	86.8032	51.5698	68.7396	63.3549	43.4479	52.2415	45.9288	9.83164e-12	3.98857e-10
Os12g0170300	419.507	548.208	507.602	330.362	381.864	332.34	348.358	399.506	459.7	239.929	256.675	208.767	200.549	321.143	250.198	223.65	324.717	297.37	9.89119e-12	4.0064e-10
Os02g0703300	340.174	143.631	209.013	178.574	200.393	176.302	163.749	117.96	187.217	585.073	255.64	348.312	492.778	301.81	399.458	519.238	348.276	324.615	9.97931e-12	4.03573e-10
Os10g0181100	0	2.19283	1.92638	8.92871	1.72011	0	2.08598	2.22566	3.70726	49.1658	47.6091	46.1485	9.54996	21.4811	25.7715	48.4337	43.0224	27.2459	1.00034e-11	4.03911e-10
Os02g0569900	12.0203	4.38567	11.5583	1.78574	3.44022	6.07939	4.17196	15.5796	1.85363	223.213	30.0144	488.955	34.3799	8.59245	302.815	37.0376	51.2171	272.459	1.07138e-11	4.31914e-10
Os11g0684000	150.253	103.063	70.313	233.039	34.4022	58.7675	79.2672	104.606	55.6089	1152.45	194.576	358.201	279.814	119.22	205.098	550.578	156.724	161.918	1.09514e-11	4.40802e-10
Os10g0163220	14.4243	37.2782	34.6749	26.7861	44.7228	53.7013	21.9028	30.0464	73.2184	74.732	83.8334	120.865	65.8947	73.0358	128.857	127.495	91.1665	141.679	1.11118e-11	4.46559e-10
Os11g0173100	0	3.28925	0	1.78574	3.44022	4.05293	1.04299	0	1.85363	8.84984	22.7696	26.3706	11.46	12.8887	22.5501	18.5188	27.6572	21.0183	1.17093e-11	4.69837e-10
Os03g0684700	1349.88	713.767	892.879	564.295	817.912	697.104	656.04	1105.04	851.743	218.296	461.601	227.446	295.094	369.475	315.701	329.777	314.473	159.583	1.19405e-11	4.78365e-10
Os03g0772600	270.456	343.178	221.534	411.614	295.859	215.818	187.738	186.955	295.654	1317.64	462.636	1599.82	988.421	515.547	1337.97	918.816	704.748	785.46	1.22725e-11	4.90902e-10
Os02g0135200	117.799	143.631	53.9387	99.1087	107.507	59.7807	76.1382	34.4977	67.6575	415.942	252.535	439.51	209.144	325.439	445.632	257.126	327.79	286.471	1.24324e-11	4.96524e-10
Os01g0947800	0	6.5785	7.70554	5.35723	6.88044	9.11909	7.30092	3.33849	5.56089	20.6496	28.9795	35.1608	17.1899	33.2957	24.6977	27.7782	44.0467	38.1443	1.29231e-11	5.1532e-10
Os03g0126700	2428.09	1334.34	536.498	690.19	848.014	693.051	397.379	760.062	495.846	438.559	253.57	231.841	403.008	328.661	255.567	221.513	242.769	165.811	1.35173e-11	5.38177e-10
Os10g0536400	391.861	194.066	109.804	122.323	142.769	177.316	127.245	70.1083	78.7793	1455.31	317.739	772.439	644.622	137.479	525.094	603.997	238.672	327.729	1.35859e-11	5.40071e-10
Os08g0526400	506.053	350.853	223.461	341.077	221.034	208.726	207.555	228.13	238.191	1349.11	410.887	768.043	816.522	376.994	845.09	1198.73	582.851	515.337	1.3664e-11	5.42336e-10
Os02g0774100	533.7	369.492	454.627	311.612	325.101	250.268	262.833	511.902	475.456	194.696	100.393	114.273	120.33	148.22	185.77	121.084	146.481	110.541	1.38708e-11	5.48847e-10
Os03g0801900	69.7176	112.931	102.098	107.145	91.1658	129.694	107.428	124.637	146.437	407.093	186.296	372.485	368.628	197.626	297.446	401.003	240.72	233.536	1.38539e-11	5.48847e-10
Os02g0782600	770.499	853.012	657.86	761.619	785.23	586.661	570.515	757.837	635.795	597.856	480.231	436.213	475.588	582.138	499.323	329.064	386.177	314.496	1.44195e-11	5.69683e-10
Os05g0417600	304.113	99.7739	103.062	125.002	104.927	89.1644	55.2784	102.38	122.34	462.158	358.103	602.128	368.628	403.845	629.254	393.88	428.175	406.353	1.51865e-11	5.99063e-10
Os03g0342100	116.597	115.124	38.5277	94.6444	59.3438	29.3837	58.4074	60.0928	33.3653	207.48	174.912	186.792	202.459	198.7	168.589	168.094	116.775	101.199	1.54221e-11	6.07422e-10
Os07g0570100	122.607	168.848	401.651	258.933	284.678	290.798	352.53	170.263	387.409	624.405	543.365	807.599	569.178	494.066	781.735	579.068	667.871	784.682	1.58579e-11	6.2363e-10
Os12g0159000	459.174	149.113	162.779	154.467	122.988	110.442	125.159	166.924	224.289	834.835	324.984	438.411	568.223	364.105	557.309	922.378	426.126	347.969	1.60182e-11	6.28011e-10
Os03g0821100	2566.33	1219.22	1363.88	1083.05	1267.72	1208.79	1122.26	1184.05	1102.91	743.386	531.98	548.289	673.272	602.546	631.402	519.238	716.015	496.654	1.60015e-11	6.28011e-10
Os05g0384300	0	6.5785	0	1.78574	0	0	0	11.1283	1.85363	65.8821	92.1133	219.755	26.7399	25.7773	86.9788	105.415	78.8744	102.756	1.71155e-11	6.7001e-10
Os03g0198600	127.415	13.157	15.4111	14.2859	20.6413	14.1852	22.9458	22.2566	12.9754	196.663	110.743	130.754	167.124	127.813	79.4621	177.353	61.4605	70.8393	1.76888e-11	6.91398e-10
Os10g0559200	317.335	99.7739	104.988	108.93	104.927	104.363	94.912	126.863	86.1938	40.3159	33.1194	43.951	28.6499	32.2217	34.362	23.5046	36.8763	21.7967	1.87748e-11	7.32732e-10
Os07g0245200	109.384	89.9061	102.098	110.716	190.072	235.07	260.747	115.734	177.948	355.96	399.502	449.399	368.628	249.181	298.52	401.003	313.449	513.001	1.96683e-11	7.66438e-10
Os05g0116000	5520.91	3241.01	3006.12	2314.32	2793.46	2605.02	2027.57	2875.55	2623.81	1551.67	1566.96	1228.43	1772.47	1701.31	1412.06	1323.38	1626.66	1192.59	2.00502e-11	7.79032e-10
Os05g0380300	262.042	208.319	159.89	222.325	213.294	115.508	262.833	114.621	176.095	427.742	599.254	895.501	445.983	669.137	803.212	659.553	722.161	643.003	2.00522e-11	7.79032e-10
Os09g0272200	376.234	215.994	69.3498	98.2159	131.588	79.0321	83.4391	191.407	72.2916	32.4494	30.0144	13.1853	17.1899	40.8141	34.362	14.2452	34.8276	28.0244	2.14572e-11	8.32358e-10
Os02g0557800	1840.3	5610.36	4266.94	3449.16	4541.09	2642.51	3409.53	3778.06	4238.33	1254.71	1850.54	1482.25	1159.37	2442.4	2175.54	1321.24	2551.64	1521.1	2.28437e-11	8.84805e-10
Os12g0515500	290.891	479.134	467.148	391.078	474.75	345.512	373.39	313.818	365.165	230.096	166.632	171.409	159.484	178.293	186.843	99.7165	193.601	105.091	2.41994e-11	9.35905e-10
Os06g0167400	257.234	425.41	392.019	402.685	356.063	390.094	350.444	543.061	489.358	145.531	251.5	243.928	199.594	225.552	310.332	174.504	241.745	211.74	2.45006e-11	9.46129e-10
Os04g0338100	2174.47	2836.43	1997.66	2562.54	2443.42	1984.92	1655.22	2255.71	1952.8	1528.07	885.943	916.378	1161.28	1373.72	1344.41	922.378	1022.29	637.554	2.45797e-11	9.47756e-10
Os10g0501500	2381.22	1640.24	1156.79	1875.03	1056.15	1381.04	1364.23	1021.58	1148.32	3609.75	3038.7	3714.96	2416.14	3473.5	4165.32	3198.05	3431.55	3299.09	2.65487e-11	1.02215e-09
Os01g0669100	180.304	219.283	52.0124	100.894	73.9647	79.0321	160.62	60.0928	98.2424	342.194	395.363	736.179	481.318	484.399	620.664	393.88	635.092	540.247	2.69065e-11	1.03437e-09
Os03g0382100	322.143	673.2	1112.49	512.508	474.75	1074.03	1465.4	1465.6	1089.01	1775.87	2413.57	3609.47	1683.66	1226.57	2523.46	1686.63	2444.08	2546.32	2.78132e-11	1.06763e-09
Os08g0495500	289.689	319.057	298.589	389.292	323.381	297.89	362.96	304.915	312.337	528.04	623.058	724.092	572.998	763.654	1041.6	501.432	710.894	554.259	2.78672e-11	1.0681e-09
Os02g0134400	52.8892	108.545	96.3192	135.716	106.647	99.2967	115.772	95.7033	92.6815	235.996	180.087	434.016	286.499	236.292	424.156	252.14	324.717	274.016	2.84049e-11	1.08709e-09
Os04g0688600	186.314	76.7491	5.77915	23.2147	18.9212	4.05293	8.34391	8.90264	7.41452	393.326	155.247	297.768	139.429	180.441	274.896	212.966	330.863	200.063	2.92146e-11	1.11642e-09
Os07g0127500	0	0	0	0	0	0	0	0	0	7.86652	26.9095	28.5681	3.81998	17.1849	21.4762	1.42452	6.14605	4.67073	3.06879e-11	1.17097e-09
Os06g0196300	7614.84	8864.53	9922.8	4848.29	7739.63	6185.78	6019.09	8021.27	7696.27	4802.51	6873.3	5707.04	5040.47	6499.11	5953.22	4902.49	5758.85	5017.14	3.17057e-11	1.20801e-09
Os02g0782300	167.082	251.079	251.393	293.755	276.078	213.792	233.63	289.336	283.605	449.375	396.397	560.375	450.758	433.919	595.966	524.936	554.169	494.318	3.23046e-11	1.22901e-09
Os08g0276100	1163.56	1597.48	1665.36	971.444	1536.92	1442.84	1332.94	1749.37	1607.1	1155.4	2176.56	1686.62	1163.19	2038.56	1865.21	1230.07	1931.91	1581.04	3.41309e-11	1.29657e-09
Os04g0288100	67.3135	14.2534	0	4.46436	0	1.01323	4.17196	0	1.85363	189.78	217.346	399.954	119.375	44.0363	133.153	59.8299	30.7303	80.1808	3.51047e-11	1.33159e-09
Os01g0864500	459.174	83.3276	36.6013	54.4652	33.5421	20.2646	26.0747	44.5132	27.8045	929.233	95.2182	183.495	352.394	55.8509	127.784	563.398	50.1928	59.1625	3.56696e-11	1.35103e-09
Os06g0671600	19.2324	0	3.85277	0	0	0	0	2.22566	3.70726	136.681	10.3498	72.5191	58.2548	17.1849	129.931	23.5046	32.779	42.0365	3.68282e-11	1.39286e-09
Os07g0181100	0	6.5785	0	0	0	0	2.08598	0	0	27.5328	64.1688	58.2351	24.8299	6.44434	36.5096	47.0092	51.2171	74.7316	3.76748e-11	1.42278e-09
Os12g0573200	841.419	764.202	685.793	933.051	715.565	776.136	777.027	634.313	714.574	1260.61	918.028	1202.06	1143.13	979.539	1054.48	1096.88	1088.88	1086.72	3.88456e-11	1.46484e-09
Os04g0228400	137.031	168.848	65.4971	121.431	192.652	48.6351	61.5363	84.575	52.8285	25.5662	49.6791	13.1853	24.8299	21.4811	22.5501	25.6414	147.505	28.0244	4.00375e-11	1.50757e-09
Os04g0366000	9.61622	4.38567	0	6.2501	0	0	7.30092	0	5.56089	43.2659	206.996	206.57	95.4996	53.7028	182.548	124.646	113.702	105.87	4.01832e-11	1.51084e-09
Os01g0947700	103.374	214.898	150.258	169.646	127.288	125.641	131.417	95.7033	85.267	315.644	294.969	429.621	233.019	356.587	541.201	335.475	484.514	405.575	4.10683e-11	1.54186e-09
Os08g0140500	91.3541	30.6997	38.5277	127.681	54.1834	66.8733	64.6653	48.9645	64.8771	259.595	155.247	393.361	143.249	108.48	108.455	113.249	76.8257	133.116	4.23962e-11	1.58939e-09
Os03g0788500	31.2527	24.1212	25.043	42.8578	49.8832	59.7807	67.7943	36.7234	54.6821	140.614	61.0638	80.2105	99.3196	57.999	95.5693	156.697	74.777	100.421	4.35637e-11	1.63078e-09
Os06g0601000	2436.51	2618.24	2509.11	2353.61	2661.01	2238.23	1943.09	2569.52	2528.35	1526.11	1300.97	1386.65	1496.48	2108.37	1732.06	1547.74	1667.63	1500.86	4.59874e-11	1.719e-09
Os08g0335500	86.5459	134.859	79.9449	106.252	79.125	24.3176	51.1065	72.3339	51.9016	60.9656	14.4897	21.9755	36.2899	17.1849	2.14762	2.84904	4.09737	0	4.65487e-11	1.73746e-09
Os05g0135400	0	0	0	0	0	0	0	7.78981	1.85363	22.6163	19.6646	34.062	8.59496	13.9627	32.2144	22.7923	15.3651	27.2459	5.01474e-11	1.86906e-09
Os01g0931000	138.233	114.027	124.252	230.361	129.868	102.336	125.159	201.422	172.388	90.465	27.9445	13.1853	43.9298	30.0736	41.8787	26.3536	27.6572	7.78454	5.06339e-11	1.88446e-09
Os04g0481300	449.558	405.674	362.16	164.288	291.559	236.083	209.641	342.751	278.045	124.881	216.311	141.742	153.754	221.256	208.32	134.617	235.599	140.9	5.11422e-11	1.90062e-09
Os09g0561500	6.01013	4.38567	3.85277	3.57149	0	4.05293	4.17196	5.56415	1.85363	52.1157	28.9795	28.5681	24.8299	12.8887	24.6977	26.3536	15.3651	10.8984	5.17726e-11	1.92127e-09
Os02g0632900	19.2324	12.0606	20.227	14.2859	10.3207	14.1852	17.7308	26.7079	28.7313	154.381	43.4692	65.9265	45.8398	49.4066	94.4955	173.792	54.2902	70.8393	5.30231e-11	1.96484e-09
Os02g0813600	7.21216	39.471	73.2026	62.501	56.7636	46.6087	85.5251	50.0773	98.2424	369.727	233.906	254.916	241.614	210.515	221.205	258.551	199.747	213.296	5.314e-11	1.96633e-09
Os11g0202300	544.518	732.406	633.78	476.793	611.499	440.756	426.582	582.01	490.285	774.853	994.616	944.946	590.188	858.171	796.769	784.911	969.028	649.231	5.43832e-11	2.00944e-09
Os05g0579600	522.882	967.039	1002.68	747.333	859.195	544.106	644.567	1152.89	883.255	323.511	371.558	310.953	355.259	675.581	555.161	380.347	515.244	306.711	5.53701e-11	2.04297e-09
Os04g0524600	6.01013	53.7244	52.0124	80.3584	25.8016	57.7542	26.0747	15.5796	30.5849	233.046	200.786	298.867	160.439	98.8132	241.608	226.499	133.165	169.703	5.5727e-11	2.05318e-09
Os07g0614000	413.497	1845.27	1098.04	1125.02	1278.9	881.512	570.515	1011.56	900.864	467.075	204.926	125.26	261.669	273.884	226.574	201.57	216.136	144.792	5.61872e-11	2.06717e-09
Os09g0115900	1476.09	258.754	256.209	634.832	303.599	280.665	165.835	156.909	141.803	1077.71	716.206	879.02	1020.89	1181.46	842.943	1445.89	987.466	628.213	5.68463e-11	2.08843e-09
Os02g0510600	835.409	2141.3	1623.94	812.513	1424.25	1577.6	1246.37	1426.65	1365.2	681.438	961.497	907.588	772.592	1071.91	984.686	547.016	935.225	846.18	6.09776e-11	2.23701e-09
Os01g0384800	286.082	100.87	131.957	132.145	118.688	125.641	100.127	133.54	195.558	1131.8	264.955	374.682	1094.43	444.659	355.432	1635.35	229.453	186.051	6.12461e-11	2.24365e-09
Os09g0538000	7414.1	6794.49	7651.6	3812.56	6220.78	10721	1516.51	4512.52	2900.93	1203.58	392.258	76.9142	936.851	454.326	479.994	270.659	824.596	347.191	6.14704e-11	2.24866e-09
Os08g0203201	45.677	1.09642	0.963192	8.92871	2.58016	0	0	0	1.85363	134.714	100.393	194.483	78.3097	106.332	192.212	113.249	127.018	125.331	6.25735e-11	2.28576e-09
Os05g0267900	106.98	176.523	139.663	157.145	196.092	145.905	118.901	126.863	140.876	271.395	307.389	298.867	206.279	266.366	336.103	287.753	244.818	277.13	6.26814e-11	2.28645e-09
Os03g0277600	0	0	0	5.35723	0	0	0	2.22566	0	40.3159	19.6646	42.8522	20.0549	6.44434	20.4024	18.5188	12.2921	17.9044	6.30402e-11	2.29627e-09
Os07g0532500	316.133	306.997	261.988	191.967	266.617	223.924	219.028	356.105	285.459	81.6152	109.708	83.5069	78.3097	128.887	170.736	93.3062	227.404	99.6421	6.45814e-11	2.34908e-09
Os04g0546800	2769.47	775.166	635.707	1150.91	663.962	653.535	944.948	722.226	587.601	3113.18	2184.84	2446.97	2380.81	3155.58	2588.96	2666.7	3123.22	2178.89	6.50877e-11	2.36415e-09
Os01g0314800	21452.6	5734.26	4268.87	3983.1	4450.78	3509.84	3929.98	7098.74	4234.62	2968.63	658.248	1017.47	2158.29	709.951	1182.27	3320.56	605.386	428.15	6.56916e-11	2.38271e-09
Os04g0165700	4272	3368.19	2763.4	2517	3034.27	2099.42	2083.89	2861.08	2928.74	1681.47	1382.73	1284.47	1208.07	1799.04	1602.13	1368.97	1584.66	1026.78	6.62996e-11	2.40137e-09
Os03g0149300	116.597	233.537	367.939	160.717	400.785	236.083	212.77	357.218	377.214	273.362	537.155	517.523	283.634	639.063	614.221	350.432	640.214	400.125	6.76187e-11	2.44226e-09
Os09g0472900	0	10.9642	5.77915	60.7153	10.3207	8.10586	16.6878	31.1592	22.2436	92.4317	422.272	186.792	263.579	92.3688	126.71	170.943	303.205	84.0731	6.75324e-11	2.44226e-09
Os02g0803600	40.8689	26.314	31.7853	31.2505	35.2622	15.1985	47.9775	33.3849	27.8045	7.86652	8.27984	2.19755	3.81998	4.29622	0	2.13678	4.09737	7.78454	6.7909e-11	2.4493e-09
Os08g0156000	266.85	43.8567	23.1166	172.324	36.9824	36.4764	50.0635	71.2211	25.9508	142.581	22.7696	20.8767	168.079	45.1104	18.2548	34.9008	5.12171	8.563	7.04747e-11	2.53827e-09
Os01g0153800	12.0203	4.38567	3.85277	0	1.72011	0	6.25793	0	7.41452	21.6329	24.8395	39.5559	25.7849	30.0736	28.9929	34.1885	29.7059	23.3536	7.76896e-11	2.79421e-09
Os09g0334500	1638.36	782.841	536.498	799.12	586.557	576.529	421.368	495.209	458.773	2871.28	898.363	1461.37	1997.85	990.28	1647.23	1990.06	1207.7	1033.79	8.4037e-11	3.01828e-09
Os05g0457200	151.455	62.4957	47.1964	36.6077	56.7636	51.6748	20.8598	45.626	34.2922	10.8165	10.3498	8.7902	12.4149	15.0368	15.0334	7.83487	11.2678	7.00609	8.45429e-11	3.03221e-09
Os01g0848900	504.851	549.305	252.356	607.153	408.526	193.527	115.772	145.781	138.095	701.104	678.947	541.696	513.788	828.097	577.711	638.898	632.019	463.18	8.79244e-11	3.14909e-09
Os07g0597200	122.607	209.416	111.73	277.683	147.069	117.535	112.643	120.186	151.071	1192.76	316.704	581.252	707.652	267.44	393.015	815.539	259.159	258.447	8.91239e-11	3.18761e-09
Os01g0194600	1126.3	478.038	218.645	220.539	274.357	193.527	160.62	273.756	183.509	136.681	72.4486	82.4081	94.5446	68.7396	99.8646	89.0326	49.1684	70.0609	9.19404e-11	3.28377e-09
Os10g0508700	1700.87	1971.36	2375.23	1116.09	1845.68	1872.45	2055.73	2364.76	2869.42	4156.47	4878.9	3596.29	4691.9	5275.76	3683.18	7289.99	6646.96	3471.13	9.35174e-11	3.33545e-09
Os08g0174100	254.83	382.649	204.197	187.503	204.693	197.58	116.815	242.597	211.314	107.181	20.6996	28.5681	157.574	97.7391	46.1739	9.97165	25.6086	5.44918	9.60458e-11	3.42088e-09
Os10g0456800	1359.49	967.039	493.154	996.445	891.877	555.251	461.001	573.107	422.628	1505.46	1271.99	1258.1	1708.49	1648.68	792.474	1418.11	1236.38	1048.58	9.63686e-11	3.42763e-09
Os12g0467300	117.799	196.259	137.736	280.362	250.276	218.858	215.899	139.104	175.168	387.426	399.502	362.596	451.713	322.217	410.196	325.503	375.934	339.406	9.98855e-11	3.5478e-09
Os06g0280900	444.75	342.082	384.314	464.293	380.144	441.769	444.313	390.603	417.994	688.321	660.317	699.919	658.947	752.913	580.933	658.841	508.074	645.339	1.00827e-10	3.57628e-09
Os09g0514700	188.718	129.377	144.479	143.752	79.9851	145.905	137.675	75.6724	125.12	251.729	209.066	190.088	238.749	185.812	225.501	309.121	167.992	209.404	1.08092e-10	3.82869e-09
Os07g0448100	88.95	40.5674	25.043	21.4289	46.443	9.11909	7.30092	42.2875	18.5363	6.88321	1.03498	0	1.90999	1.07406	0	1.42452	1.02434	1.55691	1.08296e-10	3.83064e-09
Os12g0265100	573.367	581.101	595.253	536.616	571.076	527.894	571.558	494.096	578.333	362.843	434.692	341.719	364.809	309.328	265.232	292.027	381.055	310.603	1.1126e-10	3.93008e-09
Os09g0109800	2223.75	2420.89	2395.46	1907.17	2222.38	1755.93	1904.5	2014.22	2241.04	1547.74	1491.41	1341.6	1462.1	1328.61	1384.14	1445.18	1237.41	1412.12	1.11629e-10	3.93769e-09
Os05g0535800	966.43	722.538	1010.39	659.832	838.553	676.839	717.576	864.668	887.889	363.827	519.56	376.88	428.793	596.101	398.384	400.291	519.342	469.408	1.15547e-10	4.07029e-09
Os04g0391500	412.295	861.783	618.369	1128.59	676.863	717.368	507.936	425.101	458.773	2111.18	1354.79	1425.11	1701.8	1362.98	1361.59	2086.92	1461.74	881.989	1.16255e-10	4.08964e-09
Os06g0232100	343.78	1027.34	600.069	728.583	743.947	712.302	777.027	451.809	761.842	2013.83	1563.86	2039.33	1634.95	1897.86	2140.11	1768.54	1895.03	1712.6	1.1745e-10	4.126e-09
Os12g0566700	3240.66	2613.86	2851.05	2537.54	2618.87	2300.04	2424.95	2766.49	2741.52	1898.78	2000.62	1721.78	2045.6	1886.04	1718.1	1672.39	1939.08	1590.38	1.29611e-10	4.54701e-09
Os04g0684100	250.022	234.633	138.7	203.575	234.795	170.223	189.824	153.57	196.485	408.076	376.733	772.439	318.969	501.584	710.864	682.346	542.902	719.292	1.32544e-10	4.64356e-09
Os05g0574400	21302.3	12055.1	14779.2	7132.26	12258.4	12446.5	12878.8	16256.2	16067.3	5453.47	6975.77	5444.43	6423.3	6959.88	6263.55	6686.7	8109.72	6500.09	1.32819e-10	4.64685e-09
Os01g0279400	143.041	161.173	226.35	163.395	191.792	165.157	138.718	145.781	213.167	33.4327	78.6585	47.2473	34.3799	70.8877	95.5693	88.3203	119.848	85.63	1.33497e-10	4.66422e-09
Os05g0171900	63.7074	460.495	173.375	666.082	235.655	250.268	311.854	130.201	189.07	1547.74	1505.9	1843.74	945.446	1518.72	1635.42	1675.24	1539.59	1703.26	1.39572e-10	4.86984e-09
Os01g0888900	320.941	129.377	78.9817	175.003	104.927	72.9527	78.2242	17.8053	42.6335	300.895	254.605	243.928	338.069	303.958	260.936	226.499	201.795	178.266	1.41631e-10	4.93497e-09
Os03g0196600	952.005	444.049	309.185	579.474	350.902	318.155	356.702	566.43	384.628	178.963	143.862	99.9885	280.769	225.552	184.696	129.631	250.964	147.906	1.43552e-10	4.99513e-09
Os10g0555100	88.95	78.942	117.509	138.395	117.827	81.0586	111.6	93.4777	132.535	805.335	155.247	236.237	709.562	176.145	252.346	1365.4	142.384	234.315	1.48325e-10	5.15424e-09
Os04g0630400	835.409	718.153	397.798	575.009	473.89	425.557	300.381	408.408	325.312	352.027	173.877	96.6922	278.859	148.22	186.843	187.325	152.627	50.5995	1.50107e-10	5.20911e-09
Os11g0621300	661.115	570.137	445.958	691.083	596.878	505.603	502.721	434.003	457.847	1204.56	819.704	1124.05	927.301	1075.13	1220.92	811.265	900.397	885.881	1.5496e-10	5.37028e-09
Os02g0526400	1478.49	1408.9	512.418	2801.83	573.656	769.043	608.063	474.065	537.553	5646.2	1490.37	3399.61	3234.57	2768.92	3283.72	4962.32	1359.3	2420.21	1.57045e-10	5.43519e-09
Os11g0628000	19.2324	15.3498	19.2638	14.2859	6.88044	20.2646	14.6018	2.22566	16.6827	61.9489	31.0494	71.4203	44.8848	11.8146	40.8049	64.1035	45.0711	49.8211	1.58283e-10	5.47069e-09
Os07g0645300	127.415	104.16	48.1596	50.0008	64.5041	31.4102	52.1494	129.088	65.8039	17.6997	18.6296	4.3951	13.3699	15.0368	32.2144	14.2452	12.2921	10.8984	1.63981e-10	5.65998e-09
Os03g0314500	308.921	237.922	53.9387	331.255	84.2854	66.8733	193.996	193.632	126.047	1071.81	1051.54	1625.09	861.406	525.213	868.714	695.166	911.665	938.816	1.70686e-10	5.88352e-09
Os04g0605300	2530.27	1960.39	2017.89	1883.07	1966.95	1592.8	1983.77	2477.16	2360.6	1122.95	1261.64	1232.83	1380.92	1171.8	1418.51	1307	1400.28	1059.48	1.72332e-10	5.93194e-09
Os06g0530600	119.001	8.77133	8.66873	37.5006	1.72011	1.01323	2.08598	8.90264	0.926815	198.63	32.0844	185.693	253.074	32.2217	140.669	386.045	40.9737	84.0731	1.72553e-10	5.93194e-09
Os02g0471500	762.085	610.704	500.86	808.049	655.362	824.771	707.147	579.784	542.187	1152.45	1057.75	858.143	1268.23	949.466	885.895	1068.39	745.721	760.55	1.75695e-10	6.03188e-09
Os03g0834050	51.6872	32.8925	55.8651	95.5372	65.3642	18.2382	46.9345	51.1902	39.853	202.563	203.891	250.521	119.375	312.55	353.284	233.622	207.942	220.303	1.96622e-10	6.74132e-09
Os05g0499800	641.882	449.531	365.05	242.861	258.016	250.268	234.673	330.51	306.776	228.129	125.233	196.681	107.915	91.2948	158.924	106.127	123.945	97.3068	2.01826e-10	6.91053e-09
Os10g0205700	2883.66	4242.04	1122.12	1491.99	1486.17	1066.93	683.158	880.248	600.576	583.106	694.472	564.77	411.603	845.282	755.964	397.441	842.009	485.755	2.02275e-10	6.91502e-09
Os11g0228201	0	0	0	0	0	0	0	4.45132	1.85363	28.5161	12.4198	48.3461	18.1449	8.59245	12.8857	13.533	12.2921	14.0122	2.02496e-10	6.91502e-09
Os12g0124000	2550.7	4826.43	4140.76	3223.27	4258.99	2474.31	3467.94	4603.78	4747.15	1709.99	2701.3	2055.81	1580.52	2452.07	2558.89	1948.03	3091.47	1925.9	2.09387e-10	7.14086e-09
Os06g0128800	10.8182	2.19283	0	11.6073	9.4606	0	6.25793	4.45132	2.78045	102.265	33.1194	147.236	182.404	15.0368	106.307	101.141	97.3125	73.9532	2.16484e-10	7.37308e-09
Os09g0375900	257.234	259.851	255.246	157.145	202.113	156.038	179.394	238.145	153.851	120.948	145.932	134.05	129.879	107.406	85.905	91.1694	109.605	102.756	2.24886e-10	7.6491e-09
Os08g0356500	146.647	117.317	162.779	124.109	175.451	188.461	101.17	84.575	119.559	517.224	237.011	428.522	320.879	237.366	403.753	324.079	411.786	234.315	2.35893e-10	8.01288e-09
Os01g0650200	1590.28	755.431	591.4	1055.37	588.277	524.854	522.537	563.092	600.576	1950.9	1527.63	2311.82	1624.45	1889.26	2378.49	1811.28	2238.19	2150.87	2.45651e-10	8.33331e-09
Os06g0282000	28.8486	19.7355	52.0124	10.7145	22.3614	12.1588	58.4074	48.9645	64.8771	47.1991	102.463	204.372	55.3898	75.1839	163.219	144.589	134.189	120.66	2.47944e-10	8.4e-09
Os08g0507701	14.4243	6.5785	4.81596	8.92871	1.72011	3.0397	7.30092	0	7.41452	30.4828	21.7346	60.4326	45.8398	69.8137	40.8049	49.146	35.852	43.5934	2.49242e-10	8.43284e-09
Os05g0489200	3566.41	1737.82	1719.3	1461.63	1565.3	1676.9	1494.6	2043.15	1907.39	957.749	724.486	417.534	1011.34	781.913	500.397	840.468	1080.68	692.046	2.51881e-10	8.51091e-09
Os03g0844900	2105.95	3244.3	3319.16	1841.99	2797.76	1936.29	2202.79	2755.37	3212.34	1318.63	1926.1	1714.09	1118.3	1983.78	1903.87	1589.77	2334.48	1594.27	2.56768e-10	8.66465e-09
Os03g0743900	3268.31	4213.53	3502.17	4055.42	3563.21	3419.66	3475.24	3398.58	3085.37	2851.61	2885.53	2499.71	2633.88	3049.25	2460.1	2314.85	2166.48	2065.24	2.59819e-10	8.75611e-09
Os05g0136900	662.317	654.561	765.738	756.262	725.886	734.593	689.416	771.191	637.649	1222.26	1341.33	1664.64	1099.2	876.43	1787.9	1080.5	1376.72	1466.61	2.65311e-10	8.92946e-09
Os05g0519200	381.043	851.916	714.688	742.869	777.489	773.096	859.423	674.375	872.133	1845.68	1391.01	1718.48	1460.19	1295.31	1634.34	2225.81	1665.58	1571.7	2.71546e-10	9.12736e-09
Os02g0197200	2681.72	867.265	627.038	625.903	690.624	636.31	566.343	1011.56	709.014	284.178	212.171	140.643	189.089	353.364	284.56	220.801	349.301	217.967	2.85251e-10	9.57549e-09
Os05g0162000	63.7074	17.5427	1.92638	39.2863	22.3614	16.2117	6.25793	13.354	9.26815	147.497	72.4486	141.742	110.78	45.1104	81.6097	227.923	99.3612	160.362	2.9056e-10	9.74098e-09
Os03g0320100	242.809	137.052	116.546	238.397	139.329	115.508	164.792	223.679	173.314	316.628	472.986	574.659	386.773	511.251	573.416	772.803	437.394	589.29	2.94256e-10	9.85201e-09
Os02g0617800	2221.35	1312.41	1531.48	808.049	1532.62	852.128	1234.9	1652.55	1475.49	513.291	827.984	575.758	699.057	633.693	468.182	565.535	658.652	632.883	2.9551e-10	9.88112e-09
Os04g0525100	153.859	75.6527	43.3436	108.93	61.0639	80.0453	77.1812	121.298	64.8771	277.295	388.118	397.756	166.169	231.996	373.687	356.13	454.808	405.575	2.99261e-10	9.99352e-09
Os08g0203150	0	16.4462	0	9.82159	1.72011	0	4.17196	2.22566	7.41452	140.614	106.603	164.816	73.5347	171.849	248.051	141.74	114.726	124.553	3.06761e-10	1.02307e-08
Os08g0423600	0	0	0	0	0	0	2.08598	0	0	1.96663	63.1338	63.7289	1.90999	8.59245	37.5834	95.4429	62.4849	122.217	3.10234e-10	1.03331e-08
Os03g0102700	21.6365	26.314	47.1964	49.1079	55.9036	118.548	93.869	102.38	50.048	108.165	170.772	235.138	99.3196	100.961	152.481	136.754	166.968	205.512	3.15197e-10	1.04848e-08
Os02g0194600	38.4649	38.3746	22.1534	26.7861	18.0611	17.2249	14.6018	28.9336	9.26815	5.89989	2.06996	3.29632	5.72998	8.59245	4.29525	2.84904	4.09737	0	3.15612e-10	1.0485e-08
Os12g0624900	241.607	271.911	281.252	238.397	257.156	249.255	352.53	296.013	279.898	139.631	179.052	171.409	147.069	163.257	172.884	152.424	190.528	179.823	3.1668e-10	1.05069e-08
Os06g0223700	396.669	489.002	357.344	226.789	313.92	262.427	175.222	399.506	219.655	198.63	111.778	96.6922	95.4996	127.813	109.529	51.995	142.384	93.4145	3.27427e-10	1.08495e-08
Os11g0546300	563.751	391.421	344.823	325.898	357.783	284.718	222.157	416.198	324.385	197.646	204.926	178.001	155.664	191.182	180.4	154.561	181.309	131.559	3.29398e-10	1.09007e-08
Os02g0777800	570.963	265.333	369.866	443.757	313.92	368.816	337.928	387.265	362.385	757.153	605.464	649.376	894.831	535.954	709.79	854.713	561.34	502.881	3.43366e-10	1.13483e-08
Os12g0639600	50.4851	209.416	127.141	204.468	135.029	141.852	127.245	72.3339	168.68	678.488	416.062	715.302	403.008	303.958	729.119	353.281	498.855	579.948	3.60027e-10	1.18837e-08
Os01g0214200	353.396	274.104	194.565	301.791	188.352	288.771	317.069	251.499	215.021	589.989	531.98	662.561	488.003	457.548	736.635	549.865	446.613	567.493	3.63128e-10	1.19682e-08
Os09g0522000	205.547	8.77133	5.77915	9.82159	4.30027	4.05293	9.3869	0	23.1704	574.256	7.24486	21.9755	706.697	13.9627	9.66431	1864.7	16.3895	10.1199	3.63519e-10	1.19682e-08
Os04g0616300	453.164	742.274	513.381	879.478	551.295	485.338	522.537	294.9	563.504	1655.9	1134.34	1525.1	1102.07	1071.91	1530.18	1683.78	1078.63	1223.73	3.68855e-10	1.21283e-08
Os01g0688600	153.859	168.848	150.258	231.254	226.194	185.421	203.383	179.166	145.51	297.945	268.06	404.349	311.329	286.773	311.406	356.13	342.13	327.729	4.01783e-10	1.31941e-08
Os07g0638400	1026.53	350.853	67.4234	519.651	119.548	80.0453	113.686	150.232	101.023	584.089	97.2882	18.6792	301.779	30.0736	45.1001	41.3111	6.14605	10.8984	4.11684e-10	1.3502e-08
Os02g0738200	28.8486	0	0	7.14297	0	2.02646	4.17196	0	3.70726	149.464	30.0144	93.3958	29.6049	12.8887	60.1335	69.8015	19.4625	24.9105	4.15629e-10	1.3614e-08
Os05g0454500	2012.19	951.689	813.897	1588.42	1240.2	641.376	713.404	736.693	673.795	2555.64	1430.34	1602.01	2467.71	1693.79	1490.45	3290.64	1092.97	1120.2	4.21897e-10	1.38017e-08
Os04g0448600	5831.03	4263.96	4289.09	3218.8	3863.37	2719.51	3158.17	4077.41	4340.27	2185.91	2149.65	2089.87	1536.59	2263.04	2413.93	2041.34	2245.36	1760.86	4.25631e-10	1.39061e-08
Os02g0705100	4864.6	5209.07	4238.04	3038.44	3841	2787.4	3330.26	4220.96	3925.99	2452.39	2423.92	2533.77	2224.19	3635.68	3018.49	2163.14	3196.97	2178.89	4.26955e-10	1.39316e-08
Os06g0608700	13926.7	22264.9	14753.2	12377.9	16054.6	9662.18	11487.5	13514.2	14085.7	6969.74	11068.1	8349.59	5740.48	10094	9726.59	6776.45	12525.7	7579.81	4.33598e-10	1.41305e-08
Os05g0345500	1296.99	1276.23	963.192	1328.59	1183.44	1088.21	1015.87	727.79	987.985	1794.55	1694.26	2165.68	1552.82	1840.93	2139.03	1945.9	2002.59	1973.38	4.36021e-10	1.41914e-08
Os10g0114300	238.001	114.027	122.325	125.895	139.329	89.1644	64.6653	97.929	98.2424	240.912	209.066	431.818	294.139	385.586	481.068	251.428	442.516	456.174	4.53233e-10	1.47079e-08
Os03g0679700	2111.96	5501.82	7480.15	3512.56	4762.98	4031.65	3960.23	3887.11	5601.67	2298.99	1742.91	1591.03	1671.24	2120.19	1730.99	1272.1	1634.85	1210.5	4.52684e-10	1.47079e-08
Os05g0395116	133.425	54.8208	54.9019	76.7869	31.822	69.913	62.5793	38.949	78.7793	15.733	11.3848	9.88897	21.0099	23.6292	8.5905	17.8065	22.5355	13.2337	4.53608e-10	1.47079e-08
Os01g0276900	275.264	258.754	284.142	195.539	220.174	203.66	125.159	281.546	240.045	132.748	97.2882	115.371	87.8596	144.998	142.817	62.6789	99.3612	79.4023	4.55134e-10	1.47388e-08
Os01g0846400	76.9297	137.052	117.509	182.146	67.0843	80.0453	71.9662	51.1902	77.8525	28.5161	0	0	3.81998	4.29622	2.14762	5.69809	8.19474	7.00609	4.74097e-10	1.53335e-08
Os05g0127300	189.92	101.967	191.675	249.111	178.891	241.149	265.962	267.079	288.239	631.289	322.914	388.966	549.123	262.07	267.379	725.081	244.818	370.544	4.75605e-10	1.53629e-08
Os02g0656600	43.273	33.9889	65.4971	37.5006	46.443	59.7807	42.7625	66.7698	85.267	49.1658	77.6235	182.397	55.3898	75.1839	113.824	76.2119	87.0691	144.792	4.77892e-10	1.54174e-08
Os02g0258800	460.376	1062.43	736.842	758.941	697.504	354.631	442.227	683.277	419.847	589.989	158.352	39.5559	148.979	59.0731	57.9859	34.9008	88.0935	32.6951	4.79091e-10	1.54367e-08
Os07g0294800	420.709	769.684	683.866	733.94	589.137	679.879	615.363	540.835	620.039	1274.38	1156.07	1196.57	1181.33	1191.13	1290.72	1032.78	1322.43	995.643	4.83418e-10	1.55566e-08
Os06g0224200	96.1622	77.8456	25.043	87.5014	64.5041	89.1644	87.6111	67.8826	63.0234	279.262	153.177	320.842	182.404	162.182	248.051	272.796	185.406	215.632	4.99215e-10	1.60449e-08
Os07g0691300	182.708	262.044	205.16	252.683	176.311	205.686	188.781	265.966	192.778	745.353	457.461	527.412	785.962	508.029	716.233	1316.97	425.102	349.526	5.02845e-10	1.61413e-08
Os01g0175100	715.206	124.991	137.736	162.503	171.151	182.382	154.362	229.243	181.656	976.432	388.118	670.252	994.151	561.731	609.925	1226.51	714.991	589.29	5.05953e-10	1.62208e-08
Os04g0525200	7.21216	48.2423	22.1534	26.7861	33.5421	18.2382	93.869	22.2566	29.6581	152.414	166.632	236.237	111.735	143.924	181.474	252.14	204.868	314.496	5.27439e-10	1.68675e-08
Os05g0488600	177.9	485.712	488.338	390.185	472.17	301.943	418.239	349.428	458.773	117.015	135.582	152.73	143.249	123.516	178.253	128.919	185.406	95.7499	5.27152e-10	1.68675e-08
Os01g0218100	824.591	646.886	171.448	600.01	363.803	243.176	151.233	235.92	152.924	482.808	164.562	117.569	320.879	81.6283	93.4217	58.4054	34.8276	34.252	5.40133e-10	1.7252e-08
Os02g0726600	1661.2	1531.69	1515.1	1067.87	1247.94	1135.83	959.55	1435.55	1457.88	754.203	748.291	777.932	655.127	1010.69	938.512	715.11	1056.1	829.832	5.67173e-10	1.80932e-08
Os02g0575900	57.6973	48.2423	23.1166	83.9299	31.822	30.397	16.6878	22.2566	12.9754	159.297	55.8889	103.285	127.014	89.1467	108.455	99.7165	65.5579	94.9714	5.70419e-10	1.81742e-08
Os04g0656100	25900.1	21402	16788.4	17516.4	18552.2	15242	16140.3	14658.2	18619.7	35677.6	27373.2	36296.9	28409.2	32505.2	38067.7	29991.2	35204.6	31805.3	5.74459e-10	1.82802e-08
Os04g0573900	335.366	285.068	157	432.15	264.037	206.699	159.577	132.427	121.413	644.072	372.593	499.942	425.928	385.586	464.961	428.781	322.668	281.8	5.82283e-10	1.85062e-08
Os03g0264400	372.628	526.28	566.357	518.758	617.519	717.368	648.739	544.174	674.721	1589.04	909.748	1521.8	1152.68	886.096	1246.7	1301.3	924.981	835.281	6.01487e-10	1.90929e-08
Os08g0194350	34.8588	111.834	78.0185	44.6436	65.3642	40.5293	34.4186	51.1902	56.5357	9.83315	32.0844	4.3951	13.3699	38.666	20.4024	7.12261	26.6329	6.22763	6.03081e-10	1.91199e-08
Os03g0743500	320.941	106.352	46.2332	124.109	87.7256	74.9792	87.6111	84.575	55.6089	531.974	248.395	442.806	379.133	190.108	410.196	466.531	185.406	228.866	6.05246e-10	1.91649e-08
Os04g0674700	38.4649	33.9889	19.2638	20.536	20.6413	14.1852	14.6018	23.3694	23.1704	127.831	43.4692	150.532	71.6247	70.8877	144.965	84.759	67.6066	78.6239	6.56188e-10	2.07268e-08
Os05g0140300	86.5459	167.752	137.736	180.36	147.929	116.522	104.299	85.6879	96.3888	33.4327	40.3642	38.4571	42.0198	66.5915	76.2407	55.5563	65.5579	48.2642	6.56114e-10	2.07268e-08
Os03g0765400	1286.17	387.035	421.878	932.158	412.826	609.966	411.981	360.557	355.897	1296.01	683.087	759.253	1463.05	977.391	714.085	1148.16	524.463	735.639	7.18175e-10	2.26569e-08
Os01g0365000	12.0203	4.38567	3.85277	1.78574	5.16033	3.0397	6.25793	2.22566	0	35.3994	30.0144	85.7044	24.8299	19.333	92.3479	36.3253	52.2415	58.3841	7.27096e-10	2.29102e-08
Os05g0186100	85.3439	101.967	102.098	53.5723	118.688	101.323	156.448	198.084	137.169	57.0323	38.2943	40.6547	63.0297	70.8877	54.7644	44.1602	55.3145	42.815	7.68442e-10	2.41833e-08
Os08g0141300	1553.02	1641.34	1106.71	1255.38	1391.57	1356.72	1211.95	1366.55	1251.2	2685.43	1939.55	2568.93	2300.59	2125.56	2570.71	2252.88	2151.12	2097.16	7.70857e-10	2.42296e-08
Os03g0411600	84.1419	72.3635	112.693	78.5727	104.067	82.0718	58.4074	121.298	80.6329	203.546	157.317	191.187	184.314	183.664	183.622	233.622	199.747	228.087	7.77363e-10	2.44043e-08
Os05g0485300	180.304	72.3635	32.7485	62.501	66.2242	34.4499	65.7083	48.9645	40.7799	296.961	157.317	231.841	180.494	213.737	316.775	265.673	178.236	224.973	7.78964e-10	2.44246e-08
Os09g0530000	7225.38	7410.68	8206.4	6257.24	7118.67	6251.64	6974.47	8905.97	9190.3	3900.81	5407.77	4995.03	4018.62	5861.12	5698.72	4943.8	6183.96	4483.9	7.88776e-10	2.47021e-08
Os01g0261200	890.702	651.271	449.811	759.834	546.995	512.695	584.074	390.603	506.041	1926.31	701.717	795.513	1270.14	763.654	793.547	1900.31	540.853	594.739	7.96805e-10	2.49232e-08
Os01g0972200	21.6365	10.9642	11.5583	7.14297	6.88044	4.05293	6.25793	6.67698	18.5363	55.0657	66.2387	76.9142	13.3699	23.6292	30.0667	39.8866	43.0224	52.9349	8.1504e-10	2.54626e-08
Os01g0704100	4.80811	8.77133	1.92638	0	6.88044	6.07939	2.08598	0	0	17.6997	38.2943	19.7779	11.46	19.333	12.8857	22.7923	30.7303	21.7967	8.18761e-10	2.55477e-08
Os08g0462900	141.839	105.256	183.006	76.7869	94.606	85.1115	60.4934	139.104	100.096	31.4661	31.0494	63.7289	26.7399	27.9255	30.0667	29.9149	63.5092	38.9227	8.82555e-10	2.75049e-08
Os02g0822100	1639.56	1187.42	1122.12	925.908	1141.29	782.215	957.464	924.761	1015.79	677.504	751.396	617.511	642.712	642.286	633.549	477.215	668.896	527.014	8.95154e-10	2.783e-08
Os03g0393700	58.8993	91.0026	156.037	82.1442	122.128	114.495	132.46	52.303	108.437	298.928	206.996	375.781	210.099	215.885	286.708	254.989	230.477	269.345	8.94977e-10	2.783e-08
Os12g0432600	26.4446	0	0	0	0	0	4.17196	2.22566	0	57.0323	14.4897	36.2596	52.5248	8.59245	4.29525	42.7356	12.2921	7.78454	9.08989e-10	2.82259e-08
Os03g0310400	439.942	489.002	489.301	566.973	502.272	429.61	420.325	587.574	405.945	896.784	771.06	1091.08	746.807	880.726	867.64	900.298	770.306	837.617	9.18554e-10	2.84885e-08
Os12g0131400	0	0	1.92638	16.9646	6.88044	4.05293	11.4729	0	7.41452	39.3326	13.4547	30.7657	53.4798	27.9255	16.1072	34.9008	13.3165	35.8089	9.21603e-10	2.85387e-08
Os02g0599400	117.799	132.666	98.2456	85.7157	73.1046	53.7013	65.7083	67.8826	60.243	44.2492	25.8745	19.7779	33.4249	39.7401	32.2144	17.8065	45.0711	26.4674	9.22397e-10	2.85387e-08
Os07g0690900	21.6365	31.7961	29.8589	32.1434	29.2419	44.5822	20.8598	27.8207	48.1944	200.596	84.8684	115.371	139.429	74.1099	150.334	158.122	158.773	65.3902	9.37304e-10	2.89651e-08
Os11g0242400	2392.03	4224.49	3796.9	2416.11	3350.77	2978.9	3009.02	3613.36	3781.41	2058.08	2628.85	2163.49	1787.75	2991.25	2614.73	2112.57	2997.23	2159.43	9.60462e-10	2.9645e-08
Os09g0287000	1632.35	484.616	651.118	804.477	670.843	821.731	966.851	1119.51	1212.27	1729.65	1465.53	3276.55	2334.01	2881.69	3201.03	2822.69	3656.9	3780.17	9.91639e-10	3.05706e-08
Os11g0595200	8507.95	6503.94	5928.45	3860.78	5365.88	4752.06	4115.63	6596.85	5834.3	2977.48	2912.43	3018.33	2327.33	3507.87	3385.73	2536.36	4055.37	2650.64	1.00411e-09	3.09178e-08
Os02g0769800	149.051	91.0026	59.7179	108.93	71.3845	84.0983	44.8485	61.2056	45.4139	246.812	135.582	159.322	154.709	119.22	151.408	237.183	114.726	129.223	1.07199e-09	3.29684e-08
Os07g0124100	317.335	213.801	167.595	189.289	133.308	130.707	137.675	100.155	212.241	679.471	352.928	531.807	295.094	235.218	554.087	427.356	396.421	463.959	1.07702e-09	3.30836e-08
Os09g0460400	126.213	50.4352	32.7485	24.1075	33.5421	24.3176	36.5046	43.4003	35.219	14.7497	10.3498	6.59265	13.3699	13.9627	11.8119	8.54713	13.3165	3.11382	1.11359e-09	3.41659e-08
Os04g0635650	451.962	88.8097	47.1964	72.3226	24.9416	49.6484	67.7943	91.252	40.7799	447.409	335.334	559.276	318.969	599.323	628.18	444.451	647.384	544.14	1.12313e-09	3.44177e-08
Os03g0192500	2785.1	2807.92	1917.72	2518.79	2704.87	1878.53	2087.02	2158.89	1998.21	3210.52	3310.9	3400.71	3706.34	3761.34	3474.86	3158.88	3780.85	2967.47	1.12607e-09	3.44667e-08
Os10g0395000	189.92	32.8925	75.129	87.5014	49.8832	66.8733	54.2354	60.0928	35.219	320.561	143.862	190.088	190.999	89.1467	167.515	243.593	186.43	156.469	1.16053e-09	3.54791e-08
Os06g0650900	926.763	1157.82	601.995	848.228	672.563	498.51	464.13	635.426	607.991	1806.35	920.098	1252.6	1778.2	1697.01	1465.75	1885.35	1239.45	1262.65	1.1829e-09	3.612e-08
Os01g0905200	239.203	128.281	134.847	59.8224	88.5856	124.628	167.921	169.15	225.216	712.904	229.766	330.731	789.782	236.292	304.963	1042.75	263.256	269.345	1.2025e-09	3.66748e-08
Os02g0590400	1322.23	1820.05	2175.85	1291.09	1805.25	1723.51	2182.98	3394.13	3309.66	918.417	1342.37	986.7	1052.41	811.986	803.212	1054.15	1776.21	1466.61	1.22956e-09	3.74556e-08
Os12g0186600	269.254	138.148	34.6749	374.113	167.711	120.575	111.6	30.0464	81.5597	410.043	432.622	632.894	596.873	839.912	506.839	1123.24	315.497	536.355	1.23477e-09	3.7526e-08
Os03g0107700	222.375	41.6638	75.129	96.4301	33.5421	60.7939	50.0635	55.6415	117.706	380.543	101.428	153.828	349.529	60.1471	114.898	470.804	67.6066	85.63	1.23479e-09	3.7526e-08
Os01g0303800	664.721	131.57	82.8345	301.791	121.268	139.826	110.557	90.1392	131.608	580.156	500.931	497.745	657.992	473.659	375.834	806.991	469.149	646.117	1.28571e-09	3.89813e-08
Os08g0478700	4636.22	1609.54	1230.96	1660.74	1368.35	1654.61	1857.56	2129.96	1709.97	5143.72	2276.96	2630.47	5834.07	3090.06	4721.55	7189.56	3124.24	3573.88	1.28422e-09	3.89813e-08
Os10g0553800	1629.95	2097.44	1504.51	1745.56	1685.71	1380.02	1163.98	1584.67	1678.46	1092.46	776.235	680.141	974.096	1107.35	820.393	763.543	961.858	519.229	1.30058e-09	3.93856e-08
Os06g0698748	3429.38	1192.9	636.67	2455.4	1207.52	948.385	805.187	626.523	500.48	2863.41	2309.04	2452.46	2836.34	2863.43	2050.98	2998.62	1982.1	2096.38	1.34959e-09	4.08215e-08
Os01g0645200	2519.45	3723.43	3963.53	3725.95	3388.62	3935.39	4233.49	4244.33	4261.5	4668.78	5315.66	5998.21	5122.6	5923.42	6132.54	4849.78	5929.92	5618.88	1.37881e-09	4.16562e-08
Os09g0542200	1198.42	1787.16	1550.74	1841.99	1591.1	1553.28	1518.59	1397.71	1320.71	2377.66	2353.55	2486.53	2243.29	2560.55	2407.49	2387.5	2401.06	2143.86	1.3959e-09	4.2123e-08
Os02g0610800	3893.37	3998.63	3495.42	2521.47	3533.96	2705.33	2690.91	3545.47	3408.83	2180.01	2374.25	2230.51	1971.11	2746.36	2540.64	1997.18	2997.23	2252.07	1.43216e-09	4.31665e-08
Os02g0787300	555.336	478.038	438.252	429.471	398.205	443.796	375.476	380.588	337.361	1547.74	551.645	753.759	980.781	635.841	807.507	2423.82	733.429	700.609	1.45132e-09	4.36928e-08
Os02g0595100	1503.74	2063.46	1903.27	1675.92	1666.79	1252.35	1322.51	1454.47	1514.42	1121.96	880.768	610.919	878.596	787.283	666.838	1123.24	800.011	597.853	1.51429e-09	4.5535e-08
Os03g0736600	2478.58	2337.56	2540.9	2377.72	2603.39	2344.62	2399.92	3334.04	3610.87	1179	1429.31	1385.55	1185.15	1560.6	2062.79	1759.28	1853.04	1430.8	1.52849e-09	4.59084e-08
Os04g0379600	439.942	426.506	316.89	456.257	405.086	301.943	413.024	300.464	304.922	1408.11	563.029	910.884	755.402	539.176	970.726	923.09	502.952	596.296	1.581e-09	4.743e-08
Os08g0412700	397.871	245.597	44.3068	255.361	48.1631	63.8336	64.6653	68.9954	74.1452	243.862	68.3087	17.5804	45.8398	17.1849	17.181	25.6414	4.09737	4.67073	1.62309e-09	4.86359e-08
Os04g0122000	159.87	221.476	54.9019	258.04	180.611	126.654	90.74	51.1902	72.2916	583.106	428.482	513.128	313.239	397.401	275.97	328.352	211.015	315.274	1.66104e-09	4.9715e-08
Os04g0557800	52.8892	27.4104	104.025	45.5364	81.7052	150.972	143.932	151.345	126.974	15.733	12.4198	10.9877	51.5698	25.7773	10.7381	14.9575	8.19474	4.67073	1.70518e-09	5.09769e-08
Os05g0582350	465.184	1049.27	757.069	534.83	654.502	541.066	541.311	820.155	752.574	394.309	352.928	307.657	295.094	381.29	484.289	204.419	423.053	323.837	1.8031e-09	5.38415e-08
Os05g0404400	2055.47	1857.33	2218.23	1427.7	1837.08	1447.91	1335.03	1827.27	1870.31	1153.43	1182.98	1057.02	994.151	1434.94	1206.97	1000.73	1212.82	987.858	1.84383e-09	5.49936e-08
Os02g0813350	1241.69	925.375	905.4	775.012	890.157	896.71	820.832	967.049	967.595	726.67	609.603	512.029	617.882	544.546	458.518	571.233	539.828	501.325	1.85248e-09	5.51876e-08
Os01g0818600	1080.62	583.294	738.768	374.113	580.537	448.862	544.44	616.508	737.745	380.543	318.774	337.324	276.949	276.032	277.044	297.725	321.644	288.807	1.93088e-09	5.74566e-08
Os03g0351300	1259.72	609.608	602.958	1384.84	601.178	969.663	699.846	742.257	658.966	1646.07	951.147	907.588	2183.12	1382.31	1066.3	2055.58	865.569	1044.69	1.96431e-09	5.83836e-08
Os04g0634700	38.4649	60.3029	44.3068	53.5723	53.3234	30.397	68.8373	53.4158	44.4871	190.763	96.2532	294.472	133.699	96.6651	163.219	134.617	132.14	208.626	1.96662e-09	5.83849e-08
Os08g0137800	9.61622	0	0	3.57149	0	0	0	0	3.70726	77.6819	2.06996	54.9387	42.0198	15.0368	47.2477	43.4479	10.2434	34.252	1.98422e-09	5.88392e-08
Os04g0340300	14.4243	43.8567	73.2026	94.6444	48.1631	95.2438	263.876	231.469	164.046	243.862	706.892	1013.07	297.004	239.515	146.038	259.263	164.919	414.138	2.00811e-09	5.9479e-08
Os01g0693400	1383.53	979.1	516.271	978.587	559.896	673.799	663.341	566.43	480.09	2430.76	728.626	565.869	1713.26	877.504	696.904	1883.93	850.204	577.613	2.04643e-09	6.05441e-08
Os02g0669100	1012.11	1083.26	782.112	2008.96	1003.68	1001.07	1108.7	990.418	804.475	657.838	635.478	402.151	497.553	697.062	424.156	596.874	377.982	527.014	2.10011e-09	6.20608e-08
Os11g0139700	1550.61	1552.53	1386.03	2189.32	1504.24	1273.63	1124.34	938.115	1069.54	2459.27	1957.15	2050.31	3162.95	2499.33	1830.85	3809.17	1612.32	1796.67	2.10578e-09	6.21569e-08
Os02g0129300	2280.25	3012.95	2915.58	2213.43	2631.77	1812.67	2211.14	2513.88	2939.86	1185.88	1742.91	1565.75	952.131	1869.93	1664.41	1310.56	1882.74	1319.48	2.16302e-09	6.37731e-08
Os06g0702000	33.6568	39.471	27.9326	19.6432	29.2419	20.2646	29.2037	31.1592	32.4385	44.2492	53.819	52.7412	52.5248	54.7769	82.6836	59.8299	112.678	105.091	2.17898e-09	6.41699e-08
Os08g0161500	205.547	226.958	202.27	180.36	201.253	250.268	148.104	159.135	220.582	99.3149	74.5186	39.5559	101.23	68.7396	109.529	86.1835	78.8744	69.2824	2.31994e-09	6.82429e-08
Os04g0429600	76.9297	57.0137	38.5277	32.1434	65.3642	26.344	47.9775	15.5796	57.4625	7.86652	2.06996	0	1.90999	2.14811	0	0	6.14605	0	2.40871e-09	7.07732e-08
Os09g0135700	296.901	327.829	278.362	429.471	269.197	353.618	292.037	273.756	278.045	643.088	421.237	661.462	524.293	550.991	571.268	613.969	451.735	448.39	2.41536e-09	7.08875e-08
Os03g0837900	350.992	184.198	207.086	149.11	172.871	157.051	176.265	201.422	206.68	91.4483	79.6935	73.6179	63.0297	122.442	111.676	80.4855	82.9717	72.3962	2.43328e-09	7.13318e-08
Os06g0693100	709.196	751.045	653.044	768.762	614.079	750.805	493.334	484.081	445.798	1571.34	940.797	1086.69	1197.57	1059.02	725.897	1079.07	791.817	867.198	2.46292e-09	7.21183e-08
Os01g0104400	7161.68	4675.12	5611.56	4146.5	4350.16	4135	4535.96	5844.58	5641.52	3369.82	3498.23	2701.89	3076.04	3252.24	2947.62	2938.79	3278.92	2980.7	2.47147e-09	7.22863e-08
Os04g0282400	6077.45	7786.75	2284.69	1125.91	3830.68	1810.65	631.008	870.233	605.21	2005.96	783.48	414.238	617.882	1020.35	444.558	254.989	677.09	213.296	2.5673e-09	7.50037e-08
Os01g0328700	4666.27	5507.3	5921.7	3060.76	5098.4	3917.15	4079.13	4295.52	4732.32	3159.39	3764.22	2974.38	2782.86	4040.6	3271.91	2592.63	3337.31	2718.36	2.58349e-09	7.5391e-08
Os03g0289800	3.60608	4.38567	4.81596	20.536	11.1807	25.3308	0	7.78981	3.70726	148.481	57.9589	63.7289	41.0648	23.6292	27.9191	40.5989	19.4625	10.1199	2.59766e-09	7.57183e-08
Os12g0552400	326.951	178.716	134.847	254.468	136.749	133.747	102.213	82.3494	127.9	490.674	183.192	298.867	313.239	266.366	271.675	417.385	182.333	286.471	2.60865e-09	7.59525e-08
Os06g0110200	42.0709	37.2782	36.6013	43.7507	10.3207	6.07939	12.5159	2.22566	1.85363	11.7998	0	0	0	0	0	1.42452	0	0	2.66995e-09	7.76494e-08
Os01g0664500	2069.89	981.293	736.842	661.618	628.7	525.867	574.687	647.667	571.845	605.722	474.021	332.929	398.233	380.216	333.956	356.13	370.812	334.735	2.70008e-09	7.84367e-08
Os05g0111300	6398.39	2096.35	4897.83	1669.67	3648.35	4680.12	4167.78	6285.26	5427.43	1095.41	1909.54	886.711	1048.59	1330.76	1259.58	1123.95	1686.07	1426.13	2.8153e-09	8.16913e-08
Os01g0298400	1.20203	0	0	0	0	1.01323	0	1.11283	0	41.2992	2.06996	28.5681	18.1449	15.0368	17.181	29.9149	4.09737	6.22763	2.81943e-09	8.17188e-08
Os03g0189100	358.204	252.176	249.467	351.791	254.576	312.075	294.123	330.51	393.896	602.772	382.943	618.61	679.002	465.066	618.516	924.514	563.388	462.402	2.88559e-09	8.35422e-08
Os03g0431200	1027.73	3096.28	2473.48	934.836	2472.66	1475.27	1648.97	1878.46	2317.96	841.718	947.007	501.041	728.662	1259.87	641.066	679.497	1348.03	643.782	2.9016e-09	8.39034e-08
Os08g0189300	115.395	86.6169	87.6505	117.859	157.39	120.575	205.469	117.96	100.096	80.6319	76.5885	32.9632	59.2098	50.4806	17.181	79.7732	69.6553	38.9227	2.9046e-09	8.39034e-08
Os05g0541000	153.859	33.9889	30.8221	30.3576	31.822	21.2779	44.8485	36.7234	15.7559	6.88321	9.31482	2.19755	9.54996	4.29622	12.8857	6.41035	6.14605	6.22763	2.98632e-09	8.6167e-08
Os12g0420200	18567.7	31034.1	33869.7	19538.7	29722.6	19493.6	23020.9	32615.9	33331.1	14185.3	20214.2	16995.8	11468.5	19865.7	19078.4	15426.9	21169.1	13320.9	3.02571e-09	8.72056e-08
Os01g0279100	29134.7	32701.7	41601.2	24306.6	35402.4	25566.9	30679.5	41319.4	45492.7	14510.8	25540.2	21959	14308.7	22858.1	25862.8	20473.2	27263.9	20167.4	3.05847e-09	8.80511e-08
Os06g0107100	247.618	1178.65	1628.76	733.94	1589.38	1067.95	817.703	1334.28	1633.05	296.961	476.091	214.261	341.889	541.324	414.492	272.084	555.194	233.536	3.0658e-09	8.81633e-08
Os03g0782200	3667.38	7192.49	5528.72	1582.17	6389.35	2999.17	3217.62	3990.61	4097.45	871.217	2785.13	2236.01	700.967	2272.7	2592.18	675.935	4169.07	915.462	3.12921e-09	8.9886e-08
Os05g0566800	640.68	495.58	387.203	400.006	322.521	413.399	382.777	427.326	344.775	255.662	265.99	208.767	256.894	253.477	257.715	242.881	223.307	251.441	3.20021e-09	9.18227e-08
Os08g0140300	69.7176	13.157	0	23.2147	0	4.05293	0	0	0	269.428	128.338	484.56	94.5446	57.999	148.186	63.3912	73.7527	103.534	3.23375e-09	9.26815e-08
Os10g0563000	952.005	794.902	726.247	687.511	672.563	724.461	641.438	776.755	664.526	1067.88	1048.44	1120.75	924.436	1186.83	1157.57	1120.39	1180.04	1179.36	3.54039e-09	1.01357e-07
Os06g0234400	266.85	72.3635	141.589	60.7153	79.125	61.8071	45.8915	116.847	91.7547	32.4494	21.7346	13.1853	27.6949	30.0736	13.9596	16.382	17.4138	24.9105	3.55112e-09	1.01438e-07
Os06g0602500	134.627	200.644	91.5032	327.684	160.83	164.144	81.3531	79.0109	57.4625	574.256	221.486	347.213	353.349	234.144	294.225	284.904	196.674	186.829	3.54781e-09	1.01438e-07
Os02g0216300	3725.08	3342.97	3332.64	3993.81	4296.83	2459.11	3083.08	2634.07	3545.07	5496.73	8575.85	10871.3	4279.34	6498.04	11517.7	7363.35	11532	9921.4	3.67748e-09	1.04931e-07
Os08g0313200	2083.11	2661	2401.24	1767.89	2347.09	1870.43	1950.39	2423.74	2383.77	1586.09	1855.72	1698.71	1521.31	2130.93	2093.93	1641.76	2167.51	1780.32	3.70215e-09	1.05517e-07
Os04g0439300	332.961	203.933	183.97	157.145	153.09	113.482	117.858	182.504	151.998	92.4317	81.7635	85.7044	59.2098	91.2948	55.8382	59.1176	102.434	50.5995	3.73308e-09	1.06281e-07
Os04g0542200	103.374	364.01	282.215	532.151	356.063	346.525	525.666	504.112	905.498	156.347	76.5885	83.5069	147.069	82.7023	137.448	150.999	117.799	128.445	3.74323e-09	1.06334e-07
Os05g0122800	2555.51	1927.5	2119.99	2584.86	2212.92	2085.23	1906.58	2151.1	1856.41	1507.42	1644.58	1257	1739.05	1704.53	1220.92	1437.34	1389.01	1282.89	3.74292e-09	1.06334e-07
Os06g0699301	22.8385	42.7602	51.0492	41.0721	61.0639	51.6748	34.4186	23.3694	80.6329	120.948	68.3087	156.026	83.0847	123.516	194.36	202.282	146.481	153.355	4.0371e-09	1.14555e-07
Os09g0472700	26.4446	13.157	9.63192	91.0729	18.9212	6.07939	2.08598	13.354	5.56089	156.347	417.097	98.8897	49.6598	44.0363	65.5026	109.688	140.335	79.4023	4.2554e-09	1.20617e-07
Os04g0403500	2382.42	3372.58	3777.64	2122.36	3042.87	2262.55	2689.87	3588.87	3796.23	1431.71	2289.38	1878.9	1266.32	2033.19	2208.83	1868.26	2712.46	1648.77	4.29582e-09	1.21628e-07
Os03g0575700	128.617	192.969	74.1658	132.145	161.69	129.694	69.8803	81.2365	77.8525	290.078	197.681	226.348	212.964	237.366	318.922	328.352	264.28	254.555	4.3506e-09	1.22908e-07
Os07g0677100	0	21.9283	25.043	58.0366	10.3207	22.2911	22.9458	4.45132	7.41452	118.981	104.533	431.818	169.034	239.515	239.46	160.259	209.99	200.841	4.34649e-09	1.22908e-07
Os11g0526000	55.2932	106.352	83.7977	58.9295	92.8859	55.7278	68.8373	57.8671	97.3156	27.5328	31.0494	15.3828	9.54996	44.0363	25.7715	17.0943	24.5842	20.2398	4.43111e-09	1.25045e-07
Os03g0129300	44817.6	87290.1	76931.1	44805.2	67559.9	47527.7	49971.7	64285.9	70913.4	36404.3	45523.6	38105.5	27911.7	48390.5	45709	33681.4	53990	32480.2	4.55007e-09	1.28261e-07
Os01g0221100	187.516	383.746	302.442	825.013	548.715	633.27	467.259	252.612	343.848	917.433	709.997	863.637	1130.72	871.06	881.6	913.118	902.446	663.243	4.56664e-09	1.28587e-07
Os02g0201300	141.839	98.6775	118.473	105.359	87.7256	92.2041	95.955	96.8162	67.6575	162.247	163.527	229.644	169.034	185.812	194.36	231.485	190.528	176.709	4.68901e-09	1.31888e-07
Os10g0491400	16.8284	2.19283	0.963192	10.7145	0	0	9.3869	6.67698	1.85363	138.647	43.4692	283.484	59.2098	26.8514	269.527	90.4571	120.872	132.337	4.7227e-09	1.3269e-07
Os11g0214900	78.1318	187.487	77.0554	48.2151	83.4253	39.516	60.4934	80.1237	60.243	47.1991	28.9795	30.7657	30.5599	33.2957	28.9929	22.0801	24.5842	21.7967	4.78743e-09	1.34362e-07
Os09g0431100	2.40405	18.6391	2.88958	16.0717	8.60055	6.07939	10.4299	8.90264	7.41452	179.947	48.6441	152.73	66.8497	17.1849	89.1264	99.7165	69.6553	42.0365	4.95323e-09	1.38863e-07
Os01g0196300	61.3034	4.38567	1.92638	3.57149	0	4.05293	4.17196	0	1.85363	82.5985	26.9095	169.211	26.7399	6.44434	49.3954	29.9149	2.04868	40.4796	4.9667e-09	1.39089e-07
Os09g0460300	390.659	178.716	205.16	135.716	192.652	139.826	114.729	223.679	181.656	16.7164	87.9733	63.7289	42.0198	77.332	52.6168	28.4904	71.704	21.7967	5.12853e-09	1.43465e-07
Os07g0251900	0	0	0	0	0	0	0	0	0	38.3493	14.4897	41.7534	11.46	2.14811	21.4762	17.0943	0	10.8984	5.18955e-09	1.45014e-07
Os10g0456000	16.8284	3.28925	8.66873	12.5002	6.02038	7.09262	14.6018	8.90264	5.56089	33.4327	49.6791	43.951	37.2448	37.592	37.5834	47.7215	22.5355	33.4735	5.23017e-09	1.4599e-07
Os07g0686800	7.21216	3.28925	0.963192	16.9646	0.860055	8.10586	2.08598	0	0	66.8655	12.4198	37.3583	45.8398	4.29622	17.181	27.7782	8.19474	1.55691	5.23925e-09	1.46085e-07
Os07g0542400	7.21216	577.811	510.492	641.975	389.605	430.624	610.149	184.73	631.161	3521.25	3192.91	5591.66	3025.43	3808.6	5544.09	4949.5	4929.14	5479.54	5.35088e-09	1.49035e-07
Os03g0201901	15.6264	15.3498	9.63192	37.5006	29.2419	38.5028	41.7196	62.3184	30.5849	77.6819	82.7984	126.359	34.3799	50.4806	94.4955	71.2261	70.6796	104.313	5.3865e-09	1.49865e-07
Os06g0608800	1406.37	1820.05	1283.93	1883.96	1624.64	1054.77	1325.64	1029.37	1232.66	3214.46	2368.04	2773.31	2407.55	2259.81	2657.69	2821.26	2181.85	2052.78	5.43932e-09	1.51171e-07
Os05g0569300	358.204	401.288	304.369	458.043	343.162	336.393	226.329	220.34	320.678	919.4	475.056	741.673	627.432	491.918	575.563	804.142	392.323	652.345	5.47293e-09	1.5194e-07
Os02g0261400	0	5.48208	11.5583	3.57149	1.72011	7.09262	2.08598	0	9.26815	18.683	64.1688	47.2473	24.8299	23.6292	69.7978	14.9575	24.5842	21.0183	5.51065e-09	1.52822e-07
Os01g0701700	12.0203	37.2782	17.3375	17.8574	18.0611	8.10586	4.17196	13.354	16.6827	60.9656	64.1688	54.9387	29.6049	56.925	139.596	122.509	90.1421	103.534	5.55495e-09	1.53885e-07
Os01g0227700	72.1216	132.666	31.7853	197.325	87.7256	85.1115	58.4074	68.9954	70.4379	197.646	192.506	316.447	217.739	292.143	242.682	366.102	408.713	375.215	5.67544e-09	1.57053e-07
Os01g0817700	5035.29	5233.2	5715.58	4132.21	4898.01	5450.17	5408.94	5460.65	6148.49	4053.23	3141.17	3760.01	3722.57	4100.75	3996.73	3410.3	3798.26	4015.27	5.71712e-09	1.58036e-07
Os04g0175600	158.668	133.763	94.3928	172.324	167.711	72.9527	112.643	62.3184	78.7793	291.061	180.087	228.545	381.998	170.775	339.325	286.329	322.668	330.065	5.72566e-09	1.58102e-07
Os03g0329700	341.376	361.817	581.768	763.405	646.761	641.376	577.816	548.625	654.331	909.567	758.641	1085.59	881.461	776.543	1051.26	892.463	829.717	787.796	5.86635e-09	1.61813e-07
Os02g0584800	277.668	43.8567	101.135	78.5727	102.347	74.9792	81.3531	90.1392	162.193	945.949	203.891	235.138	790.737	127.813	304.963	758.558	233.55	159.583	5.87696e-09	1.61932e-07
Os11g0229400	66.1115	142.534	114.62	168.753	116.967	105.376	151.233	94.5905	152.924	764.036	208.031	377.978	369.583	199.774	396.237	696.591	278.621	250.662	5.94492e-09	1.63629e-07
Os06g0172800	234.395	73.4599	71.2762	207.146	118.688	121.588	150.19	143.555	137.169	328.427	285.655	397.756	316.104	305.032	341.472	409.55	273.499	392.341	6.00961e-09	1.65232e-07
Os01g0959750	1696.06	253.272	244.651	443.757	271.777	265.467	177.308	273.756	179.802	403.159	101.428	113.174	268.354	75.1839	124.562	160.259	63.5092	45.1503	6.02429e-09	1.65458e-07
Os05g0473500	201.941	446.241	563.467	572.331	521.193	738.646	704.018	537.497	725.696	2669.7	1064.99	1344.9	2076.16	1101.98	1292.87	2942.35	1176.97	1191.04	6.04124e-09	1.65747e-07
Os05g0571100	1843.91	1765.23	2279.88	1561.63	1811.28	1770.12	1642.71	1950.79	2182.65	1217.34	1344.44	1366.88	1313.12	1463.94	1463.61	1401.02	1595.93	1472.06	6.07243e-09	1.66425e-07
Os12g0130200	3.60608	4.38567	1.92638	41.0721	3.44022	2.02646	0	2.22566	0	85.5484	37.2593	38.4571	46.7948	17.1849	40.8049	47.0092	8.19474	27.2459	6.08518e-09	1.66596e-07
Os03g0787000	515.67	100.87	124.252	142.859	77.4049	121.588	113.686	114.621	85.267	599.822	152.142	326.336	339.979	173.997	322.144	589.04	242.769	226.53	6.09171e-09	1.66598e-07
Os08g0351300	39.6669	48.2423	21.1902	50.8937	91.1658	5.06616	30.2467	27.8207	9.26815	659.805	305.319	507.634	240.659	51.5547	578.785	319.805	309.351	434.377	6.11022e-09	1.66926e-07
Os06g0112100	164.678	275.201	392.019	234.825	239.095	298.903	311.854	281.546	394.823	332.361	454.356	684.537	353.349	360.883	584.154	401.003	396.421	463.18	6.14006e-09	1.67563e-07
Os09g0351700	69.7176	55.9172	151.221	21.4289	68.8044	88.1512	197.125	106.832	272.484	126.848	302.214	384.571	104.095	146.072	357.58	356.13	354.422	382.221	6.20256e-09	1.69089e-07
Os10g0490100	81.7378	6.5785	9.63192	10.7145	8.60055	12.1588	18.7738	0	9.26815	124.881	68.3087	141.742	87.8596	49.4066	124.562	135.33	142.384	77.067	6.28489e-09	1.71152e-07
Os02g0152500	621.448	1025.15	862.057	949.122	1021.74	1061.87	1075.32	692.18	957.4	1596.9	1487.27	1776.72	1479.29	1612.16	1506.56	1766.41	1651.24	1631.64	6.31757e-09	1.71677e-07
Os02g0791300	21.6365	2.19283	11.5583	20.536	43.0027	20.2646	45.8915	20.0309	44.4871	72.7653	154.212	160.421	74.4897	99.8872	57.9859	135.33	108.58	237.429	6.31406e-09	1.71677e-07
Os01g0172100	772.903	639.211	752.253	717.869	651.061	696.09	654.997	899.166	772.037	418.892	289.795	305.459	314.194	296.44	460.666	331.201	397.445	193.057	6.33387e-09	1.71789e-07
Os05g0261700	43.273	89.9061	83.7977	74.1083	70.5245	81.0586	68.8373	86.8007	101.95	173.064	127.303	212.063	99.3196	122.442	207.246	135.33	130.091	181.38	6.33506e-09	1.71789e-07
Os10g0419400	79.3338	41.6638	25.043	37.5006	16.341	24.3176	19.8168	28.9336	22.2436	177.98	87.9733	180.199	77.3547	60.1471	195.434	106.127	97.3125	107.427	6.38996e-09	1.73095e-07
Os10g0528300	1086.63	336.6	93.4296	458.043	227.054	143.879	229.458	117.96	103.803	456.258	110.743	74.7167	949.266	428.548	111.676	94.0184	8.19474	42.815	6.42778e-09	1.73936e-07
Os03g0786400	6700.1	5201.4	4243.82	3061.66	4559.15	3889.8	3138.35	4103	3146.54	1865.35	2917.61	2275.56	2595.68	3494.98	2961.57	1623.24	3078.15	1988.95	6.50727e-09	1.75902e-07
Os08g0127100	765.691	642.5	314.001	1056.27	364.663	261.414	298.295	307.141	241.899	3986.36	1155.04	2043.72	1155.55	476.881	1727.76	1672.39	759.038	800.251	6.52583e-09	1.76218e-07
Os02g0251800	37.2628	5.48208	0.963192	7.14297	0.860055	3.0397	5.21494	8.90264	4.63408	90.465	9.31482	17.5804	57.2998	36.5179	18.2548	96.8675	7.1704	10.8984	6.54957e-09	1.76673e-07
Os03g0610400	114.193	36.1817	48.1596	50.0008	32.6821	30.397	10.4299	52.303	31.5117	191.747	105.568	151.631	148.024	214.811	263.084	176.641	180.284	161.14	6.69691e-09	1.80458e-07
Os07g0678300	2129.99	1427.53	1516.06	830.37	1122.37	845.035	1498.78	1870.67	1741.49	882.034	401.572	450.498	509.968	337.254	415.565	1396.03	562.364	438.27	6.73802e-09	1.81376e-07
Os12g0152100	123.809	128.281	228.276	157.145	105.787	192.514	167.921	186.955	208.533	53.099	71.4136	57.1363	86.9046	66.5915	64.4287	50.5705	95.2638	71.6178	6.8704e-09	1.84746e-07
Os08g0425800	4564.1	1804.7	1562.3	3280.41	1385.55	1590.77	1138.94	1454.47	1113.1	2061.03	630.303	523.017	862.361	791.579	633.549	626.077	658.652	531.684	6.96885e-09	1.87197e-07
Os11g0133001	55.2932	21.9283	7.70554	148.217	8.60055	4.05293	18.7738	6.67698	1.85363	226.163	124.198	173.606	110.78	76.258	112.75	180.202	68.6309	98.0852	7.57011e-09	2.03135e-07
Os02g0782100	534.902	471.459	613.553	661.618	562.476	655.561	575.73	434.003	568.138	482.808	269.095	363.694	465.083	322.217	417.713	392.456	352.374	455.396	7.61386e-09	2.04096e-07
Os01g0711000	218.769	174.33	154.111	141.074	161.69	139.826	180.437	125.75	187.217	93.415	114.883	71.4203	79.2647	69.8137	37.5834	89.0326	55.3145	70.8393	7.87005e-09	2.10743e-07
Os01g0936200	562.549	658.946	708.909	689.297	676.003	574.503	685.244	656.569	636.722	1029.53	1122.95	965.823	823.207	828.097	883.748	930.925	892.202	872.647	8.07896e-09	2.16112e-07
Os02g0701900	114.193	58.1101	124.252	72.3226	67.0843	145.905	127.245	137.991	139.949	237.962	169.737	232.94	229.199	132.109	206.172	244.305	157.749	235.093	8.35222e-09	2.23189e-07
Os12g0534100	1232.08	327.829	417.062	267.861	236.515	247.229	307.682	418.424	307.703	199.613	167.667	124.162	137.519	158.96	131.005	158.122	170.041	122.217	8.4129e-09	2.24497e-07
Os02g0779200	2506.23	4038.1	3869.14	3219.69	3355.93	3149.12	3536.78	3164.89	3811.06	2235.08	2409.43	2161.29	2083.8	2343.59	2160.51	1883.22	2353.94	1837.15	8.41863e-09	2.24497e-07
Os01g0863300	138.233	63.5922	44.3068	122.323	43.0027	46.6087	52.1494	45.626	56.5357	413.976	26.9095	30.7657	291.274	44.0363	51.543	692.317	34.8276	29.5813	8.62444e-09	2.29747e-07
Os09g0322400	55.2932	20.8319	21.1902	50.0008	27.5217	18.2382	20.8598	20.0309	7.41452	93.415	86.9384	112.075	66.8497	71.9618	98.7907	89.0326	76.8257	56.0487	8.6554e-09	2.30332e-07
Os02g0690600	9.61622	4.38567	33.7117	12.5002	24.0815	19.2514	23.9887	63.4313	91.7547	3.93326	2.06996	2.19755	0	0	0	4.27356	8.19474	0.778454	8.68171e-09	2.30793e-07
Os06g0640599	20.4345	38.3746	75.129	16.9646	81.7052	42.5557	43.8055	86.8007	121.413	3.93326	6.20988	0	0	3.22217	8.5905	3.5613	13.3165	0	8.71092e-09	2.3133e-07
Os01g0912850	39.6669	0	1.92638	0	0	1.01323	4.17196	3.33849	0	80.6319	80.7285	86.8032	27.6949	23.6292	37.5834	73.3629	46.0954	46.7073	8.92981e-09	2.36898e-07
Os01g0864200	224.779	8.77133	7.70554	9.82159	6.88044	2.02646	2.08598	4.45132	12.9754	319.578	41.3992	128.557	148.024	35.4439	117.046	275.645	88.0935	45.9288	8.95244e-09	2.37253e-07
Os04g0486950	1269.34	446.241	67.4234	1121.45	159.97	139.826	83.4391	63.4313	83.4134	2045.3	805.215	2029.44	1847.92	3490.68	2088.57	1730.79	643.287	1560.8	9.10311e-09	2.40998e-07
Os01g0237100	1836.7	3168.64	2288.54	1655.38	2191.42	1554.3	1587.43	2144.42	2212.31	1365.83	1178.84	965.823	791.692	1492.94	1247.77	1012.83	1542.66	924.025	9.1233e-09	2.41283e-07
Os07g0509800	2018.2	2837.53	4553.97	5481.34	4244.37	5508.94	5672.82	7523.84	6638.78	1537.91	1486.23	2228.31	1331.26	2100.85	3712.17	1792.76	2896.84	1579.48	9.29131e-09	2.45474e-07
Os11g0661800	127.415	70.1706	72.2394	90.18	55.0435	42.5557	34.4186	20.0309	50.9748	403.159	72.4486	141.742	149.934	69.8137	200.803	391.743	104.483	81.7377	9.5647e-09	2.52357e-07
Os09g0305300	298.103	141.438	212.865	58.0366	136.749	105.376	165.835	185.843	204.826	50.1491	84.8684	48.3461	47.7498	54.7769	60.1335	32.0517	78.8744	54.4918	9.57149e-09	2.52357e-07
Os07g0650600	1284.97	2351.81	1729.89	1835.74	1953.18	1411.43	1975.42	1605.81	2038.07	3840.83	3918.44	4288.52	3215.47	2582.03	4912.69	3183.81	3791.09	3548.97	9.82966e-09	2.58898e-07
Os04g0612600	2199.71	2317.82	2323.22	1584.85	2017.69	2086.24	2381.14	2381.45	2433.82	1557.57	1690.12	1666.84	1598.66	1447.83	1518.37	1621.11	1665.58	1808.35	9.95555e-09	2.61801e-07
Os07g0639500	91.3541	54.8208	18.3006	49.1079	29.2419	53.7013	17.7308	26.7079	17.6095	8.84984	0	0	58.2548	18.259	2.14762	0	0	0	9.96028e-09	2.61801e-07
Os04g0667600	920.753	357.432	269.694	331.255	244.256	238.11	306.639	343.864	330.873	1330.43	445.042	540.597	1066.73	473.659	595.966	1381.07	450.711	270.902	1.00472e-08	2.63816e-07
Os09g0535900	7073.93	3012.95	2804.81	1884.85	2542.32	2272.68	1700.07	2925.63	2153.92	1024.61	1159.18	1011.97	888.146	1388.75	1345.49	878.217	1522.17	763.664	1.02833e-08	2.6974e-07
Os05g0592300	561.347	1370.52	707.946	276.79	711.265	412.385	134.546	214.776	220.582	352.027	404.677	283.484	190.999	513.399	236.239	96.1552	502.952	146.349	1.03498e-08	2.71206e-07
Os11g0603000	0	0	0	0	0	0	0	0	0	13.7664	6.20988	8.7902	5.72998	17.1849	10.7381	20.6556	10.2434	15.5691	1.05515e-08	2.75928e-07
Os09g0313550	26.4446	13.157	12.5215	6.2501	12.0408	4.05293	7.30092	8.90264	10.195	26.5495	31.0494	39.5559	40.1098	37.592	51.543	32.0517	32.779	38.9227	1.05501e-08	2.75928e-07
Os10g0578800	1235.68	2701.57	976.677	1641.1	2044.35	1162.18	1420.55	982.628	1332.76	3682.52	3129.78	4013.82	3307.15	4207.08	6554.55	2936.65	4470.23	4887.14	1.07284e-08	2.79728e-07
Os04g0136700	955.611	1214.83	1706.78	893.764	767.169	1063.89	1227.6	1651.44	1962.99	676.521	497.826	373.583	546.258	549.917	475.699	420.234	793.865	609.53	1.07295e-08	2.79728e-07
Os09g0471500	43.273	10.9642	25.043	12.5002	22.3614	22.2911	14.6018	4.45132	11.1218	125.864	74.5186	102.186	59.2098	27.9255	115.972	39.8866	38.925	46.7073	1.0719e-08	2.79728e-07
Os11g0171300	175474	144345	132498	82733.5	122460	86187.5	88955.5	135475	121458	66073.9	84769	67747.1	52393.9	95336.4	77093.3	60794.3	99306.9	59183.5	1.0796e-08	2.81178e-07
Os09g0424200	21.6365	17.5427	5.77915	3.57149	6.02038	14.1852	20.8598	33.3849	5.56089	27.5328	93.1482	82.4081	82.1297	96.6651	209.393	37.7498	106.532	60.7194	1.08446e-08	2.82158e-07
Os03g0792400	2658.88	3344.07	3554.18	2697.36	2926.77	2571.58	2647.11	2930.08	3479.26	2091.51	1836.06	1849.24	1894.71	2284.52	1844.81	1980.8	1871.47	1764.76	1.09316e-08	2.84133e-07
Os04g0652700	405.083	543.823	540.351	851.799	491.951	422.518	513.151	600.928	613.552	1431.71	1054.65	1299.85	1018.03	804.468	1312.2	1116.82	1210.77	1119.42	1.1005e-08	2.85751e-07
Os03g0183200	105.778	7.67491	14.4479	23.2147	18.9212	20.2646	7.30092	4.45132	9.26815	60.9656	72.4486	87.902	97.4096	93.4429	84.8312	124.646	141.359	104.313	1.10285e-08	2.86072e-07
Os02g0186800	241.607	135.956	115.583	280.362	134.169	161.104	101.17	195.858	123.266	86.5318	28.9795	64.8277	97.4096	42.9622	83.7574	48.4337	25.6086	43.5934	1.11064e-08	2.87804e-07
Os03g0439500	858.247	561.365	1138.49	528.58	572.796	1092.26	980.41	1309.8	823.012	295.978	445.042	260.41	536.708	439.289	327.513	259.975	282.719	252.998	1.13704e-08	2.94346e-07
Os05g0537100	163.476	74.5563	26.9694	76.7869	67.9443	59.7807	41.7196	42.2875	64.8771	507.391	108.673	459.288	389.638	97.7391	233.017	394.592	116.775	126.888	1.14139e-08	2.95175e-07
Os02g0504000	2591.57	4249.71	2105.54	2469.68	3012.77	2334.49	1384.05	2086.56	2054.75	1366.81	819.704	879.02	955.951	1165.35	1508.71	577.643	1311.16	719.292	1.14488e-08	2.95779e-07
Os03g0261800	1092.64	608.511	825.455	407.149	591.718	565.383	735.307	875.797	675.648	381.526	339.474	366.991	331.384	341.55	455.296	262.112	389.25	328.508	1.1508e-08	2.9701e-07
Os02g0152600	149.051	258.754	240.798	289.29	276.078	303.97	252.403	217.002	215.948	334.327	417.097	412.04	322.789	393.105	424.156	379.635	434.321	425.036	1.17826e-08	3.03792e-07
Os05g0421900	426.72	303.707	96.3192	299.112	150.51	80.0453	89.6971	146.893	164.046	575.24	479.196	848.254	444.073	1256.65	1140.39	796.307	1084.78	1141.99	1.18175e-08	3.04387e-07
Os06g0524400	204.345	278.49	489.301	366.077	368.103	250.268	333.756	476.291	481.944	92.4317	191.471	81.3093	130.834	111.702	97.7169	141.028	144.432	59.941	1.2003e-08	3.08854e-07
Os07g0283125	51.6872	65.785	69.3498	85.7157	63.644	81.0586	40.6766	55.6415	85.267	60.9656	12.4198	39.5559	36.2899	10.7406	17.181	4.27356	8.19474	3.11382	1.21456e-08	3.12211e-07
Os09g0128400	1574.66	1331.05	851.462	1591.99	1193.76	884.551	631.008	744.483	820.231	2695.27	1410.68	1656.95	2009.31	1884.97	1296.09	2769.98	1575.44	1303.13	1.2224e-08	3.13912e-07
Os08g0375400	566.155	177.619	746.474	111.609	246.836	508.642	616.406	940.341	930.522	62.9322	111.778	90.0995	122.239	83.7764	158.924	112.537	300.132	138.565	1.23248e-08	3.16184e-07
Os07g0603300	158.668	174.33	493.154	622.331	749.968	701.157	812.488	505.225	980.57	1045.26	1523.49	1534.99	1560.46	1172.87	866.567	1948.75	1150.34	1660.44	1.25696e-08	3.22142e-07
Os12g0555200	435.134	39.471	13.4847	32.1434	12.0408	32.4234	12.5159	10.0155	9.26815	1247.83	308.424	2430.49	275.039	23.6292	1275.69	225.787	129.067	856.3	1.27894e-08	3.2745e-07
Os04g0444300	38.4649	2.19283	1.92638	10.7145	10.3207	10.1323	12.5159	18.9181	0.926815	132.748	94.1832	160.421	68.7597	64.4434	124.562	191.598	128.043	199.284	1.30772e-08	3.34484e-07
Os10g0551800	0	0	5.77915	7.14297	34.4022	22.2911	12.5159	15.5796	9.26815	39.3326	91.0783	63.7289	49.6598	40.8141	6.44287	108.264	122.921	129.223	1.33343e-08	3.40722e-07
Os12g0210500	63.7074	2.19283	9.63192	3.57149	15.481	20.2646	47.9775	27.8207	16.6827	169.13	258.745	239.533	127.969	151.442	135.3	231.485	144.432	275.573	1.36295e-08	3.47918e-07
Os01g0127900	55.2932	43.8567	19.2638	61.6081	32.6821	39.516	33.3756	28.9336	39.853	176.997	42.4342	101.087	126.059	108.48	107.381	141.028	108.58	87.1869	1.39089e-08	3.54697e-07
Os11g0547800	259.638	54.8208	131.957	56.2509	67.9443	128.68	96.998	119.073	98.2424	44.2492	18.6296	18.6792	35.3349	31.1476	10.7381	27.7782	20.4868	11.6768	1.39405e-08	3.55152e-07
Os01g0859200	2363.19	1212.64	940.075	1242.88	1282.34	959.531	1023.17	1032.71	1063.06	2614.64	2008.9	2964.49	2392.27	2829.06	3394.32	2482.23	3467.4	2806.33	1.39959e-08	3.56209e-07
Os01g0947000	0	4.38567	0	0	0	0	0	0	0.926815	27.5328	12.4198	46.1485	17.1899	17.1849	42.9525	45.5847	38.925	6.22763	1.40438e-08	3.57074e-07
Os01g0930800	1027.73	2725.69	2152.73	2460.75	2668.75	2075.1	1889.9	1938.55	2317.04	1010.85	1224.38	676.845	1023.76	1164.28	1014.75	946.594	990.539	544.918	1.41872e-08	3.60362e-07
Os01g0235100	1484.5	1541.56	1449.6	937.515	1359.75	966.623	1036.73	1436.66	1310.52	806.319	1156.07	957.033	817.477	1162.13	1084.55	878.93	1173.9	947.379	1.42677e-08	3.61511e-07
Os04g0599000	241.607	324.539	314.001	392.863	314.78	350.578	303.51	250.387	309.556	983.315	467.811	580.153	600.693	390.956	578.785	821.237	454.808	463.959	1.42651e-08	3.61511e-07
Os05g0522600	806.56	919.893	502.786	1153.59	561.616	555.251	397.379	329.398	379.067	3448.49	681.017	1900.88	1825.95	676.655	1296.09	1876.81	728.307	814.263	1.42746e-08	3.61511e-07
Os05g0104200	4.80811	4.38567	5.77915	15.1788	3.44022	2.02646	0	4.45132	0	39.3326	39.3293	76.9142	43.9298	13.9627	57.9859	45.5847	38.925	25.689	1.43045e-08	3.61555e-07
Os07g0538350	0	20.8319	16.3743	39.2863	36.1223	28.3705	21.9028	26.7079	3.70726	286.145	93.1482	174.705	185.269	78.4061	186.843	158.834	107.556	137.786	1.43019e-08	3.61555e-07
Os03g0741100	211.557	70.1706	66.4602	102.68	85.1454	54.7145	60.4934	80.1237	154.778	1146.55	80.7285	173.606	836.577	118.146	182.548	1469.39	82.9717	63.8332	1.46022e-08	3.68716e-07
Os10g0568200	14.4243	39.471	91.5032	52.6794	67.0843	73.9659	90.74	35.6105	64.8771	155.364	159.387	252.718	191.954	213.737	180.4	248.579	189.503	207.069	1.5043e-08	3.79473e-07
Os01g0949300	1800.64	211.608	283.178	361.613	393.045	325.247	332.713	386.152	400.384	1604.77	877.663	1362.48	1770.56	1477.9	1528.04	3463.72	1202.58	1127.98	1.52648e-08	3.84691e-07
Os06g0147800	651.499	434.181	377.571	566.973	378.424	394.147	397.379	375.024	501.407	1194.73	646.863	1005.38	723.887	602.546	948.176	844.741	704.748	720.849	1.54401e-08	3.88728e-07
Os08g0526633	57.6973	77.8456	17.3375	56.2509	32.6821	18.2382	33.3756	17.8053	16.6827	135.698	140.757	113.174	70.6697	133.183	124.562	110.4	118.824	87.9653	1.56392e-08	3.93354e-07
Os05g0462000	52.8892	47.1459	79.9449	91.9658	100.626	130.707	160.62	264.853	238.191	103.248	362.243	346.114	110.78	276.032	429.525	405.276	363.642	305.933	1.5777e-08	3.96432e-07
Os02g0314600	74.5257	54.8208	64.5339	103.573	63.644	36.4764	67.7943	60.0928	73.2184	590.973	80.7285	188.989	394.413	47.2585	133.153	438.753	73.7527	54.4918	1.58938e-08	3.98976e-07
Os07g0674100	1013.31	604.125	703.13	305.362	553.015	616.045	619.535	829.058	624.673	200.596	305.319	256.014	240.659	326.513	381.203	172.367	419.98	210.183	1.68543e-08	4.22673e-07
Os12g0565166	0	14.2534	12.5215	37.5006	21.5014	17.2249	6.25793	8.90264	5.56089	91.4483	34.1544	72.5191	42.0198	53.7028	91.2741	65.528	72.7283	66.1686	1.7074e-08	4.27767e-07
Os01g0178900	102.172	58.1101	48.1596	121.431	66.2242	68.8998	77.1812	38.949	57.4625	203.546	124.198	256.014	122.239	195.478	222.279	181.626	150.578	172.817	1.77231e-08	4.43595e-07
Os06g0326400	2676.91	2698.28	2299.14	2911.65	2761.64	2269.64	2254.94	2173.36	2004.7	1740.47	2093.77	1760.24	2197.45	2244.78	1838.37	1940.91	1881.72	1393.43	1.78508e-08	4.46356e-07
Os06g0683100	63.7074	195.162	74.1658	165.181	121.268	145.905	35.4616	46.7388	72.2916	49.1658	10.3498	10.9877	17.1899	20.4071	5.36906	6.41035	18.4382	7.00609	1.78781e-08	4.46604e-07
Os04g0685300	561.347	316.864	643.412	575.009	402.506	374.896	626.836	456.26	665.453	2216.39	666.527	683.438	1843.14	545.621	529.39	2582.66	543.926	639.889	1.8242e-08	4.55251e-07
Os07g0413800	6504.17	2891.25	3564.77	1569.67	2367.73	2659.73	3150.87	4647.18	4013.11	506.407	1781.2	795.513	849.947	1036.46	1371.26	720.808	1670.7	488.869	1.83924e-08	4.5856e-07
Os05g0576600	334.164	35.0853	50.086	79.4656	34.4022	50.6616	38.5906	48.9645	40.7799	543.773	105.568	508.733	327.564	92.3688	300.667	292.027	117.799	111.319	1.84368e-08	4.5922e-07
Os03g0207400	593.801	195.162	142.552	298.219	185.772	127.667	155.405	161.36	150.144	775.836	281.515	477.967	529.068	292.143	420.934	582.629	295.011	270.124	1.85343e-08	4.61203e-07
Os01g0825800	96.1622	74.5563	170.485	266.969	142.769	185.421	268.048	261.515	298.434	270.412	334.299	527.412	257.849	519.843	708.716	544.167	615.63	490.426	1.88093e-08	4.67592e-07
Os11g0148300	396.669	327.829	271.62	358.041	313.06	365.777	318.112	337.187	316.044	506.407	453.321	490.053	479.408	508.029	505.766	559.125	479.392	497.432	1.91309e-08	4.75127e-07
Os08g0472800	343.78	179.812	136.773	115.18	197.813	108.416	61.5363	109.057	115.852	38.3493	36.2243	43.951	50.6148	97.7391	44.0263	46.2969	55.3145	54.4918	1.9304e-08	4.78963e-07
Os11g0498600	287.284	131.57	204.197	58.0366	141.049	97.2703	132.46	146.893	160.339	28.5161	89.0083	39.5559	49.6598	67.6655	51.543	38.4621	49.1684	38.9227	1.93834e-08	4.80468e-07
Os01g0524500	3930.63	3789.22	3123.63	2555.4	3165	2472.29	2339.42	2872.21	2393.96	1309.78	1831.92	1712.99	1361.82	2491.81	2189.5	1035.63	2444.08	1440.92	1.94866e-08	4.82562e-07
Os07g0518500	628.66	587.679	516.271	830.37	551.295	447.849	463.087	513.014	446.725	473.958	400.537	274.694	360.034	311.476	327.513	335.475	306.278	302.819	1.99491e-08	4.93539e-07
Os12g0471100	0	4.38567	0	5.35723	0	8.10586	4.17196	8.90264	16.6827	118.981	14.4897	127.458	92.6346	12.8887	66.5764	92.5939	24.5842	29.5813	2.00323e-08	4.94644e-07
Os03g0733200	43.273	129.377	104.988	60.7153	102.347	46.6087	76.1382	58.98	84.3402	17.6997	35.1893	8.7902	15.2799	25.7773	6.44287	23.5046	75.8013	21.0183	2.00234e-08	4.94644e-07
Os12g0244100	4002.75	3784.83	5258.06	3325.05	4062.9	4372.1	3915.38	4184.24	4559	2771.97	2691.98	2719.47	2904.14	3201.76	2819.83	2690.21	3062.78	2642.07	2.02913e-08	5.00557e-07
Os08g0457300	0	2.19283	0.963192	8.92871	0	4.05293	0	0	0	41.2992	5.1749	12.0865	24.8299	2.14811	20.4024	34.9008	2.04868	3.89227	2.0671e-08	5.09434e-07
Os06g0593800	1348.67	458.302	596.216	447.329	450.669	491.417	451.614	577.558	494.919	219.279	211.136	192.286	285.544	224.478	207.246	443.026	290.913	142.457	2.09283e-08	5.15281e-07
Os02g0629200	3404.14	1575.55	1703.89	1347.34	1833.64	1070.99	1157.72	1464.48	1448.61	482.808	1008.07	577.955	684.732	967.725	643.214	821.237	843.034	599.41	2.10159e-08	5.16942e-07
Os03g0285200	211.557	92.099	58.7547	50.0008	45.5829	52.6881	64.6653	40.0619	39.853	233.046	77.6235	54.9387	178.584	68.7396	53.6906	156.697	53.2658	50.5995	2.13686e-08	5.25114e-07
Os08g0458200	134.627	293.84	207.086	233.932	144.489	99.2967	122.03	151.345	133.461	155.364	115.918	57.1363	66.8497	38.666	36.5096	55.5563	19.4625	28.0244	2.1813e-08	5.35523e-07
Os09g0442400	715.206	362.914	193.602	450.9	300.159	207.713	144.975	204.761	139.949	360.877	43.4692	53.84	470.813	183.664	97.7169	45.5847	36.8763	30.3597	2.2505e-08	5.51985e-07
Os04g0598800	16.8284	38.3746	46.2332	58.0366	49.8832	32.4234	43.8055	28.9336	51.9016	150.447	81.7635	206.57	118.42	68.7396	204.024	131.056	96.2882	94.193	2.26946e-08	5.56104e-07
Os04g0657300	1200.82	789.42	570.21	470.543	596.878	368.816	396.336	720.001	517.163	301.878	233.906	220.854	315.149	338.328	370.465	193.735	383.104	242.099	2.28345e-08	5.58999e-07
Os01g0812200	308.921	138.148	182.043	258.04	156.53	220.885	177.308	209.212	169.607	455.275	272.2	350.509	540.528	336.18	273.822	718.671	229.453	291.92	2.289e-08	5.59824e-07
Os02g0134200	209.153	36.1817	36.6013	58.9295	46.443	46.6087	39.6336	51.1902	27.8045	309.744	45.5391	119.766	354.304	66.5915	113.824	226.499	46.0954	52.1564	2.30987e-08	5.6439e-07
Os02g0275200	548.124	638.114	340.97	402.685	440.348	315.115	301.424	322.721	296.581	1533.97	546.47	1307.54	858.541	687.396	1480.79	1460.85	931.127	949.714	2.31802e-08	5.65845e-07
Os01g0944700	1051.77	278.49	723.357	781.263	851.454	856.181	823.961	595.364	646.917	2187.88	1853.65	2351.38	1952.97	1741.05	1601.05	1866.12	2783.14	1300.02	2.36397e-08	5.76513e-07
Os12g0632800	254.83	840.951	457.516	793.763	438.628	385.028	369.218	261.515	443.018	1827	943.902	1742.66	1439.18	1193.28	1805.08	1535.63	1260.97	1219.06	2.3731e-08	5.7819e-07
Os09g0400500	121.405	31.7961	39.4909	48.2151	43.8628	35.4631	31.2897	21.1438	57.4625	306.794	27.9445	83.5069	212.964	51.5547	93.4217	368.239	108.58	73.9532	2.4203e-08	5.8913e-07
Os02g0740500	215.163	75.6527	42.3804	139.288	49.8832	36.4764	35.4616	51.1902	38.9262	111.115	26.9095	17.5804	26.7399	15.0368	12.8857	1.42452	9.21908	3.11382	2.5146e-08	6.11506e-07
Os12g0112800	501.245	239.019	232.129	265.183	201.253	205.686	227.372	195.858	175.168	516.241	348.788	524.115	509.013	323.291	471.404	391.743	314.473	312.16	2.5622e-08	6.2249e-07
Os08g0203100	1.20203	23.0247	6.74234	33.0362	3.44022	0	4.17196	4.45132	0	283.195	237.011	447.201	190.044	344.772	471.404	353.281	314.473	358.867	2.57716e-08	6.25533e-07
Os03g0184000	1408.78	2599.6	2617.96	2133.07	2388.37	2274.71	1972.29	2322.48	2532.99	1383.52	1529.7	1521.8	1454.46	1729.23	1428.17	1262.84	1423.84	1366.97	2.58731e-08	6.27403e-07
Os02g0794400	4041.21	3077.64	3737.18	2758.08	3333.57	3015.38	2774.35	3735.77	3455.17	1909.6	2184.84	2073.39	1896.62	2710.92	2091.79	2200.17	2451.25	2076.92	2.61559e-08	6.33665e-07
Os01g0186600	12.0203	0	0	0	0	0	0	0	0.926815	144.547	16.5597	90.0995	26.7399	10.7406	94.4955	4.27356	20.4868	31.9166	2.63195e-08	6.37027e-07
Os12g0291100	68264.3	54493	56806.2	35330.9	49632	30888.4	36957.3	54458.5	48350.1	24176.8	32436.3	28426.4	19180.1	30430.2	31695.7	28104.4	29666	24682.4	2.72205e-08	6.58214e-07
Os01g0297200	62.5054	13.157	5.77915	12.5002	4.30027	4.05293	2.08598	0	0.926815	87.5151	12.4198	43.951	39.1548	25.7773	55.8382	24.2169	16.3895	15.5691	2.72835e-08	6.58498e-07
Os07g0639400	48.0811	67.9778	31.7853	93.7515	64.5041	57.7542	30.2467	28.9336	28.7313	24.5829	2.06996	6.59265	70.6697	30.0736	7.51669	2.84904	2.04868	0	2.7261e-08	6.58498e-07
Os05g0533500	2117.97	1590.9	1180.87	1091.98	1256.54	864.287	815.617	1244.14	1006.52	577.206	662.387	535.103	447.893	751.839	786.031	490.748	865.569	583.062	2.88187e-08	6.94897e-07
Os05g0494600	176.698	40.5674	47.1964	31.2505	33.5421	29.3837	4.17196	31.1592	32.4385	4.91658	2.06996	2.19755	1.90999	4.29622	8.5905	4.27356	4.09737	5.44918	2.89798e-08	6.98126e-07
Os08g0202200	9.61622	24.1212	3.85277	1.78574	12.0408	10.1323	4.17196	6.67698	14.829	43.2659	49.6791	81.3093	22.9199	64.4434	53.6906	45.5847	61.4605	29.5813	2.92638e-08	7.04306e-07
Os05g0438800	1316.22	1384.77	785.965	925.015	717.286	690.011	420.325	533.045	477.31	1048.21	373.628	391.164	426.883	394.179	301.741	259.263	205.893	169.703	2.993e-08	7.19665e-07
Os11g0454000	137.031	70.1706	44.3068	161.61	25.8016	50.6616	31.2897	82.3494	39.853	55.0657	0	0	9.54996	0	0	0	0	0	3.04474e-08	7.31422e-07
Os04g0608600	26.4446	46.0495	38.5277	191.967	79.9851	32.4234	22.9458	28.9336	13.9022	198.63	102.463	219.755	133.699	137.479	171.81	180.914	115.751	127.666	3.14614e-08	7.55074e-07
Os01g0227350	312.527	627.15	434.4	322.327	485.931	356.658	310.811	366.121	434.676	188.797	130.408	109.877	216.784	215.885	117.046	106.127	279.645	93.4145	3.17401e-08	7.6105e-07
Os03g0249200	1477.29	1014.19	980.529	764.298	852.314	801.466	697.76	1117.28	986.131	589.006	555.784	440.609	530.023	711.025	513.282	543.455	618.703	420.365	3.3845e-08	8.10766e-07
Os09g0520500	122.607	43.8567	36.6013	45.5364	57.6237	37.4896	21.9028	34.4977	49.1212	14.7497	16.5597	8.7902	12.4149	11.8146	8.5905	8.54713	13.3165	6.22763	3.43908e-08	8.23072e-07
Os11g0575600	9.61622	4.38567	9.63192	28.5719	29.2419	18.2382	13.5589	12.2411	12.9754	49.1658	20.6996	37.3583	42.0198	45.1104	45.1001	44.8724	76.8257	48.2642	3.4432e-08	8.23291e-07
Os03g0305400	299.305	57.0137	50.086	105.359	77.4049	83.085	85.5251	100.155	64.8771	267.462	200.786	220.854	332.339	247.033	176.105	504.281	176.187	226.53	3.46376e-08	8.27436e-07
Os03g0701100	122.607	43.8567	31.7853	41.965	34.4022	32.4234	30.2467	37.8362	24.0972	35.3994	11.3848	10.9877	26.7399	6.44434	6.44287	20.6556	4.09737	4.67073	3.51679e-08	8.39323e-07
Os04g0363700	375.032	320.154	326.522	228.575	331.981	353.618	350.444	386.152	433.749	194.696	205.961	154.927	221.559	212.663	158.924	205.843	203.844	172.038	3.62105e-08	8.63405e-07
Os04g0111100	0	10.9642	6.74234	8.92871	19.7813	21.2779	9.3869	8.90264	7.41452	57.0323	53.819	54.9387	76.3997	20.4071	63.3549	53.4196	65.5579	38.1443	3.70977e-08	8.83189e-07
Os05g0100600	91.3541	382.649	262.951	460.722	295.859	267.493	210.684	175.827	219.655	1441.54	599.254	993.292	858.541	554.213	844.017	891.75	558.267	651.566	3.71091e-08	8.83189e-07
Os09g0417600	79.3338	9.86775	26.9694	12.5002	36.9824	6.07939	18.7738	12.2411	46.3408	361.86	107.638	310.953	331.384	46.1844	307.11	155.985	53.2658	98.8637	3.74878e-08	8.91376e-07
Os06g0256500	808.964	2508.6	2428.21	1295.56	2142.4	1767.08	1755.35	1683.71	2390.26	833.852	957.357	544.992	822.252	1045.06	597.04	655.28	804.109	497.432	3.80153e-08	9.03084e-07
Os01g0390300	563.751	695.128	504.713	567.866	594.298	595.78	469.345	518.579	515.309	439.542	435.727	371.386	442.163	398.475	402.68	278.494	364.666	302.819	3.84563e-08	9.11031e-07
Os01g0747800	1202.03	397.999	409.357	403.578	411.966	335.38	379.648	421.762	414.286	1366.81	736.906	860.34	996.061	632.619	869.788	2361.86	712.942	715.399	3.84544e-08	9.11031e-07
Os04g0468000	102.172	21.9283	0	14.2859	3.44022	0	14.6018	2.22566	9.26815	922.35	304.284	707.611	371.493	149.294	783.883	253.565	419.98	487.312	3.84446e-08	9.11031e-07
Os01g0822800	817.378	99.7739	311.111	419.65	289.838	432.65	380.691	520.804	528.285	85.5484	64.1688	83.5069	163.304	172.923	163.219	230.772	129.067	101.199	3.88737e-08	9.20072e-07
Os03g0560050	0	8.77133	11.5583	0	5.16033	10.1323	13.5589	28.9336	16.6827	31.4661	58.9939	34.062	22.9199	33.2957	36.5096	11.3962	33.8033	20.2398	3.92185e-08	9.27377e-07
Os09g0258000	2605.99	3881.31	3036.94	3260.77	3122	2599.95	2958.96	3095.89	3269.8	2065.95	1948.87	2259.08	2090.49	2216.85	2396.75	1656.01	2064.05	1762.42	3.9424e-08	9.31379e-07
Os05g0517200	604.62	766.395	814.86	1057.16	909.078	1128.74	936.604	499.66	796.134	1755.22	1685.98	1567.95	2412.32	1879.6	1042.67	2461.57	1411.54	1523.43	3.95656e-08	9.33865e-07
Os06g0503400	22417.8	11242.7	6725.01	8538.53	7318.21	6729.89	5206.6	7001.92	6272.68	5289.25	3670.04	3219.41	3530.62	4243.6	3569.35	2723.68	4717.1	2760.4	3.97681e-08	9.37781e-07
Os08g0523200	86.5459	37.2782	11.5583	35.7149	25.8016	19.2514	13.5589	18.9181	14.829	10.8165	0	5.49387	60.1648	18.259	4.29525	0	0	0	3.98373e-08	9.38552e-07
Os08g0434100	1016.91	366.203	242.724	252.683	287.258	261.414	182.523	357.218	283.605	169.13	117.988	85.7044	127.969	136.405	91.2741	96.8675	138.286	96.5283	4.00955e-08	9.43769e-07
Os02g0633066	0	13.157	11.5583	10.7145	17.2011	4.05293	10.4299	2.22566	4.63408	188.797	51.749	48.3461	98.3646	22.5552	92.3479	113.962	58.3875	45.1503	4.04538e-08	9.51332e-07
Os04g0569100	205.547	63.5922	67.4234	202.682	79.125	122.601	77.1812	109.057	68.5843	88.4984	31.0494	24.173	45.8398	25.7773	49.3954	27.0659	26.6329	20.2398	4.14424e-08	9.73687e-07
Os03g0830400	67.3135	2.19283	7.70554	1.78574	1.72011	2.02646	6.25793	0	3.70726	62.9322	12.4198	41.7534	28.6499	9.66651	42.9525	43.4479	24.5842	23.3536	4.15341e-08	9.7495e-07
Os03g0376100	5449.99	3719.04	3024.42	2833.97	3387.76	2486.47	2445.81	3151.53	2972.3	2070.86	2136.2	1911.87	2015.04	2278.07	1846.96	2080.51	2118.34	1759.31	4.22858e-08	9.91688e-07
Os04g0364800	586.589	210.512	152.184	188.396	190.932	164.144	101.17	160.247	96.3888	313.678	568.204	580.153	343.799	463.992	619.59	651.006	903.47	698.273	4.24941e-08	9.95665e-07
Os02g0755900	1111.87	967.039	183.006	1273.23	192.652	100.31	187.738	190.294	162.193	1451.37	577.519	142.841	243.524	175.071	64.4287	129.631	94.2395	40.4796	4.32643e-08	1.01279e-06
Os03g0317300	0	4.38567	2.88958	7.14297	5.16033	12.1588	14.6018	28.9336	27.8045	20.6496	26.9095	43.951	20.0549	32.2217	23.6239	45.5847	43.0224	29.5813	4.34284e-08	1.0157e-06
Os03g0277100	935.177	1373.81	894.805	1529.49	1206.66	1014.25	988.754	875.797	854.523	2699.2	1573.17	1581.14	2218.46	1489.72	1673	2180.23	1395.15	1403.55	4.37088e-08	1.02133e-06
Os07g0100800	144.243	299.322	342.896	267.861	364.663	226.964	298.295	294.9	318.824	152.414	101.428	125.26	82.1297	107.406	151.408	108.976	152.627	112.097	4.38728e-08	1.02423e-06
Os02g0793900	834.207	893.579	885.173	939.301	970.142	938.253	885.498	1000.43	869.353	1269.46	1193.33	1221.84	1146.95	1156.76	1287.5	1080.5	1273.26	1189.48	4.42642e-08	1.03243e-06
Os03g0657100	495.235	290.55	213.829	246.433	258.016	295.864	181.48	224.792	257.655	631.289	456.426	580.153	538.618	401.697	550.866	739.327	579.778	472.522	4.61866e-08	1.07629e-06
Os07g0575500	33.6568	58.1101	77.0554	41.965	63.644	60.7939	65.7083	85.6879	65.8039	20.6496	20.6996	20.8767	23.8749	15.0368	15.0334	26.3536	39.9494	21.7967	4.76668e-08	1.10978e-06
Os01g0720400	352.194	163.366	107.877	119.645	106.647	115.508	137.675	154.683	112.145	264.512	298.074	377.978	328.519	455.4	537.98	339.748	581.827	347.191	4.77666e-08	1.11109e-06
Os04g0338000	1720.1	1735.63	2591.95	1567.88	1757.09	1945.41	2384.27	2530.57	2418.99	1377.62	1568	1342.7	1237.67	1204.02	1344.41	1067.68	1431.01	927.139	4.80661e-08	1.11705e-06
Os09g0511200	14.4243	47.1459	52.0124	25.0004	52.4633	42.5557	47.9775	46.7388	57.4625	11.7998	2.06996	6.59265	12.4149	4.29622	2.14762	4.27356	6.14605	1.55691	4.8651e-08	1.12962e-06
Os05g0155200	157.466	124.991	176.264	156.253	110.087	186.435	155.405	164.699	161.266	63.9155	73.4836	36.2596	75.4447	76.258	59.0597	60.5422	95.2638	60.7194	5.0031e-08	1.16061e-06
Os11g0116200	10095.8	9696.71	11176.9	9051.93	9612.83	9625.7	11217.3	13821.3	12462	6509.55	7887.59	6699.23	7147.19	5689.28	6913.2	7717.34	9519.21	7879.51	5.18113e-08	1.20037e-06
Os12g0550800	86.5459	21.9283	25.043	121.431	70.5245	18.2382	6.25793	13.354	25.9508	446.425	87.9733	279.089	165.214	133.183	98.7907	254.989	47.1198	76.2885	5.18385e-08	1.20037e-06
Os05g0430300	328.153	663.332	486.412	614.296	583.977	529.92	473.517	450.696	493.992	984.299	876.628	1104.27	773.547	847.43	1282.13	893.887	873.764	972.289	5.22717e-08	1.20931e-06
Os07g0586100	323.345	43.8567	70.313	35.7149	22.3614	26.344	20.8598	33.3849	37.0726	45.2325	4.13992	13.1853	22.9199	12.8887	6.44287	8.54713	4.09737	2.33536	5.25237e-08	1.21405e-06
Os11g0177400	435.134	556.98	314.001	317.862	298.439	236.083	164.792	217.002	270.63	116.031	190.436	143.939	130.834	229.848	239.46	121.797	135.213	119.104	5.27828e-08	1.21894e-06
Os05g0115800	605.822	896.869	947.781	1098.23	891.877	869.353	925.131	706.647	838.768	1414.99	1327.88	1759.14	1400.98	1544.49	1652.6	1237.2	1595.93	1389.54	5.31963e-08	1.22739e-06
Os06g0335950	14.4243	4.38567	0	23.2147	16.341	11.1456	8.34391	0	7.41452	52.1157	67.2737	69.2228	29.6049	51.5547	57.9859	125.358	37.9007	46.7073	5.35578e-08	1.23462e-06
Os05g0401100	7036.67	7611.32	7187.34	4074.17	6729.07	5115.81	5333.85	7908.88	8034.56	3252.81	5431.58	4201.71	2729.38	5316.58	4899.81	4347.64	6345.8	3969.34	5.39971e-08	1.24363e-06
Os05g0363200	1133.51	1142.47	2182.59	1450.92	1542.94	2187.57	2295.62	1997.53	2213.23	3428.82	2500.51	3324.89	2781.9	2830.14	3385.73	3454.46	3256.38	2800.88	5.49714e-08	1.26493e-06
Os10g0531400	76.9297	21.9283	16.3743	30.3576	14.6209	26.344	17.7308	16.6924	12.0486	93.415	64.1688	52.7412	86.9046	83.7764	80.5359	59.8299	56.3388	36.5873	5.64143e-08	1.29583e-06
Os11g0105750	2148.02	4026.04	2329	2453.61	2858.82	2118.67	1841.92	2782.07	2459.77	1645.09	1881.59	1564.65	1193.75	2167.45	1886.69	1330.5	2335.5	1274.33	5.64152e-08	1.29583e-06
Os10g0506100	574.569	206.126	207.086	208.039	172.011	185.421	187.738	242.597	206.68	67.8488	110.743	78.013	102.185	103.109	97.7169	64.8157	106.532	84.0731	5.70631e-08	1.30954e-06
Os04g0491200	25.2426	39.471	15.4111	40.1792	52.4633	23.3043	33.3756	37.8362	38.9262	131.764	57.9589	121.964	122.239	82.7023	71.9454	91.8816	134.189	95.7499	5.73183e-08	1.31423e-06
Os04g0142400	543.316	427.602	100.172	275.004	136.749	62.8204	129.331	111.283	79.7061	917.433	318.774	487.856	584.458	200.849	380.13	545.592	327.79	238.985	5.96363e-08	1.36615e-06
Os02g0139000	533.7	430.892	224.424	634.832	271.777	145.905	184.609	175.827	195.558	589.006	303.249	75.8154	240.659	54.7769	70.8716	64.8157	52.2415	38.9227	6.07614e-08	1.39069e-06
Os09g0503100	650.297	502.159	528.792	380.363	455.829	349.565	337.928	450.696	502.334	242.879	264.955	260.41	240.659	306.106	304.963	259.263	352.374	237.429	6.14686e-08	1.40562e-06
Os05g0510400	103.374	232.44	210.939	274.112	227.054	252.295	230.501	171.376	178.875	328.427	449.181	614.215	353.349	384.512	408.049	339.036	479.392	432.821	6.1715e-08	1.41e-06
Os01g0541800	283.678	364.01	531.682	378.578	430.887	417.452	357.745	408.408	504.187	702.087	740.011	725.191	578.728	646.582	813.95	956.566	713.967	685.818	6.25726e-08	1.42832e-06
Os02g0714100	104.576	149.113	175.301	209.825	206.413	274.586	265.962	204.761	179.802	338.261	383.978	370.287	357.169	280.329	259.863	357.555	339.057	394.676	6.35295e-08	1.44888e-06
Os10g0392400	179.102	120.606	48.1596	163.395	78.265	87.1379	40.6766	22.2566	100.096	1059.03	139.722	212.063	440.253	119.22	163.219	1150.3	73.7527	70.8393	6.40074e-08	1.45848e-06
Os04g0417600	64.9095	43.8567	38.5277	47.3222	61.9239	57.7542	54.2354	48.9645	37.0726	207.48	57.9589	109.877	174.764	66.5915	97.7169	289.89	79.8987	82.5162	6.41932e-08	1.46142e-06
Os01g0934100	1181.59	450.627	489.301	500.901	436.908	427.584	364.003	470.727	499.553	1435.64	552.68	1131.74	1409.57	712.099	993.276	1649.6	914.738	829.054	6.55158e-08	1.49021e-06
Os08g0109400	726.024	1183.03	716.615	1100.91	903.917	648.468	489.162	635.426	494.919	501.491	311.529	254.916	383.908	591.805	415.565	207.98	470.173	203.177	6.56193e-08	1.49124e-06
Os05g0429400	744.055	1322.28	1680.77	1672.35	1923.94	2129.81	2168.37	1542.38	2037.14	2718.87	3732.14	3182.05	3365.41	3056.76	2568.56	3189.5	3183.66	3359.03	6.59943e-08	1.49844e-06
Os09g0408600	1093.84	1533.89	1266.6	1367.88	1296.1	1097.33	1085.75	1227.45	1186.32	1813.23	1724.28	2099.76	1633.04	2122.34	2262.52	1642.47	2013.86	1725.05	6.76353e-08	1.53434e-06
Os11g0559600	16.8284	8.77133	40.4541	40.1792	38.7025	46.6087	57.3644	84.575	99.1692	90.465	381.908	119.766	80.2197	192.256	300.667	303.423	218.185	122.217	6.82374e-08	1.54663e-06
Os06g0728700	2004.98	4137.88	3003.23	2734.87	3157.26	1907.92	1926.4	2512.77	2380.06	1414.01	1365.14	1473.46	860.451	1470.38	1947.9	673.799	1499.64	1154.45	6.8503e-08	1.55129e-06
Os02g0483500	616.64	225.862	205.16	202.682	182.332	303.97	285.779	308.254	226.143	854.501	674.807	826.278	508.058	586.435	583.08	735.053	927.03	801.808	7.10127e-08	1.6067e-06
Os01g0123900	5620.68	2873.71	2852.97	2306.29	2513.94	3856.36	2822.33	4345.6	2790.64	812.219	1523.49	616.413	564.403	1257.72	1470.05	759.27	1444.32	351.861	7.15715e-08	1.61792e-06
Os01g0557100	561.347	622.765	389.13	478.579	491.951	325.247	251.36	448.47	326.239	229.113	165.597	201.076	260.714	315.773	271.675	254.989	160.822	129.223	7.17818e-08	1.62125e-06
Os11g0175700	28.8486	28.5068	57.7915	44.6436	47.303	103.35	123.073	101.267	101.023	100.298	160.422	123.063	114.6	143.924	128.857	147.438	206.917	205.512	7.22709e-08	1.63086e-06
Os02g0170000	1620.33	3398.89	2750.88	1976.82	2565.54	2237.22	1923.27	2464.92	2382.84	1420.89	2202.44	1874.51	1185.15	2514.37	1886.69	1522.1	2451.25	1610.62	7.27995e-08	1.64134e-06
Os03g0726200	2068.69	3723.43	1958.17	2825.05	2846.78	1856.24	1861.74	1741.58	1887	1554.62	1185.05	1098.77	1211.89	1952.63	1241.33	950.868	1522.17	787.017	7.60513e-08	1.71316e-06
Os01g0648000	15.6264	15.3498	17.3375	16.0717	12.0408	4.05293	29.2037	4.45132	10.195	65.8821	33.1194	43.951	43.9298	26.8514	45.1001	63.3912	49.1684	41.2581	7.67116e-08	1.72652e-06
Os01g0665400	139.435	202.837	157	232.147	150.51	194.541	215.899	223.679	229.85	302.861	306.354	369.188	338.069	283.551	359.727	349.72	280.67	348.748	7.70995e-08	1.73342e-06
Os06g0683400	320.941	52.628	102.098	74.1083	31.822	62.8204	68.8373	42.2875	215.948	491.658	149.037	171.409	458.398	122.442	165.367	862.548	99.3612	87.1869	7.71535e-08	1.73342e-06
Os09g0453400	712.802	598.643	435.363	737.512	475.61	550.185	403.637	454.034	492.139	1743.42	640.653	1017.47	1279.69	639.063	1049.11	1515.69	722.161	671.028	7.78517e-08	1.74758e-06
Os06g0729000	819.782	1369.42	1402.41	987.516	1351.15	885.565	1045.07	1342.07	1646.95	617.522	977.022	864.736	509.968	792.653	1107.1	582.629	807.182	678.034	8.00598e-08	1.79558e-06
Os10g0536100	206.749	945.111	790.781	382.149	630.42	432.65	519.409	712.211	823.012	1073.78	1354.79	1480.05	871.911	1106.28	1441.06	1116.82	1378.76	1319.48	8.09986e-08	1.81505e-06
Os08g0536000	1236.89	1210.44	1237.7	1354.49	1421.67	1312.14	1355.89	1219.66	1321.64	1721.79	1609.39	1932.74	1714.22	1674.45	1853.4	1933.79	1520.12	1670.56	8.1604e-08	1.82702e-06
Os11g0163800	869.066	504.352	533.608	691.975	515.173	420.491	499.592	513.014	416.14	526.074	366.383	329.632	551.033	468.288	431.673	504.281	342.13	351.083	8.16799e-08	1.82712e-06
Os06g0220100	60.1013	43.8567	62.6075	47.3222	37.8424	38.5028	31.2897	37.8362	49.1212	139.631	98.3231	101.087	66.8497	59.0731	102.012	86.8958	80.9231	94.9714	8.35062e-08	1.86635e-06
Os02g0187700	235.597	185.294	203.233	167.86	152.23	158.064	116.815	103.493	155.705	975.449	234.941	171.409	469.858	272.81	172.884	1237.91	284.767	295.813	8.38773e-08	1.87302e-06
Os10g0530500	5508.89	4251.9	4743.72	2639.33	4601.29	3315.29	3222.84	4819.66	4294.86	1508.41	2937.27	2136.02	1573.83	3337.09	2775.81	1609	3133.46	1248.64	8.42418e-08	1.87952e-06
Os05g0261001	0	1.09642	0	0	3.44022	2.02646	5.21494	1.11283	1.85363	38.3493	13.4547	17.5804	11.46	8.59245	19.3286	26.3536	12.2921	9.34145	8.45418e-08	1.88458e-06
Os05g0534100	338.972	313.575	356.381	327.684	403.366	211.765	350.444	399.506	451.359	116.031	213.206	161.52	181.449	185.812	169.662	207.268	264.28	193.057	8.49471e-08	1.89197e-06
Os05g0550700	0	5.48208	17.3375	10.7145	18.0611	9.11909	14.6018	2.22566	17.6095	125.864	53.819	94.4946	66.8497	36.5179	71.9454	59.8299	41.998	38.1443	8.50631e-08	1.89291e-06
Os06g0543400	736.843	266.429	223.461	155.36	243.395	132.733	126.202	224.792	162.193	97.3482	94.1832	54.9387	71.6247	110.628	91.2741	57.6931	115.751	69.2824	8.53167e-08	1.89691e-06
Os03g0849900	100.97	116.22	122.325	173.217	206.413	113.482	158.534	191.407	178.875	80.6319	68.3087	48.3461	70.6697	47.2585	38.6572	61.2544	127.018	87.1869	8.61157e-08	1.91302e-06
Os03g0370000	718.812	644.693	796.56	541.08	635.58	586.661	831.262	910.294	865.645	1136.71	899.398	997.687	1087.74	917.244	1160.79	1595.46	1111.41	1125.64	8.64247e-08	1.91823e-06
Os09g0410700	109.384	100.87	107.877	91.0729	70.5245	95.2438	63.6223	84.575	67.6575	27.5328	43.4692	15.3828	22.9199	52.6288	39.7311	32.0517	40.9737	48.2642	8.69879e-08	1.92906e-06
Os08g0451200	733.236	616.186	444.995	382.149	426.587	348.552	372.347	578.671	397.604	300.895	294.969	237.335	285.544	376.994	323.218	221.513	385.153	256.111	8.80435e-08	1.95078e-06
Os02g0792800	3029.11	2465.84	1981.29	3138.44	2273.12	2146.03	2333.17	2671.9	2506.11	4142.71	3514.79	5284.01	3972.78	4650.66	5719.12	4354.05	5067.42	4752.46	8.91631e-08	1.97389e-06
Os01g0187500	893.106	868.362	634.743	745.548	711.265	621.111	573.644	616.508	631.161	532.957	476.091	493.35	530.978	483.325	457.444	451.573	514.22	361.981	9.09237e-08	2.01113e-06
Os06g0225300	216.365	277.393	307.258	300.898	254.576	267.493	282.65	243.71	316.971	842.701	385.013	520.819	536.708	341.55	524.02	760.694	497.83	420.365	9.30943e-08	2.05737e-06
Os05g0495700	307.719	146.92	171.448	255.361	122.128	239.123	185.652	260.402	191.851	788.619	282.55	412.04	724.842	241.663	248.051	1366.12	206.917	291.92	9.48514e-08	2.0944e-06
Os03g0679800	268.052	161.173	189.749	161.61	55.0435	109.429	131.417	116.847	238.191	41.2992	50.714	29.6669	50.6148	93.4429	37.5834	61.9667	44.0467	40.4796	9.7226e-08	2.14499e-06
Os05g0444200	36.0608	8.77133	3.85277	19.6432	17.2011	8.10586	4.17196	4.45132	3.70726	85.5484	37.2593	28.5681	51.5698	24.7033	70.8716	86.1835	16.3895	14.0122	9.90927e-08	2.18429e-06
Os06g0642500	344.982	434.181	217.681	341.077	344.022	219.871	184.609	248.161	202.972	391.36	501.965	472.473	388.683	602.546	482.142	318.381	801.036	500.546	1.00408e-07	2.21138e-06
Os04g0531400	566.155	203.933	198.418	313.398	153.09	132.733	198.168	171.376	227.997	857.451	190.436	323.04	473.678	240.589	272.748	502.856	285.792	228.866	1.02677e-07	2.25942e-06
Os02g0537000	986.864	146.92	271.62	338.398	189.212	450.888	188.781	312.705	192.778	97.3482	54.854	92.2971	120.33	125.665	47.2477	74.0751	49.1684	73.9532	1.03685e-07	2.27964e-06
Os07g0490100	212.759	183.102	525.903	201.789	316.5	369.83	324.37	470.727	443.018	110.131	168.702	120.865	119.375	106.332	148.186	155.985	197.698	119.882	1.0433e-07	2.29187e-06
Os10g0360600	906.328	933.05	732.026	1063.41	1004.54	728.514	868.81	605.379	831.353	1252.74	1653.9	1877.81	1273.01	1314.64	1507.63	1408.85	1674.8	1584.93	1.06897e-07	2.34625e-06
Os11g0582100	1096.25	441.856	333.264	435.721	436.908	310.049	367.132	271.53	492.139	1025.6	827.984	1180.08	1145.04	1109.5	1063.07	1171.67	937.273	879.653	1.08896e-07	2.38808e-06
Os04g0121800	503.649	53.7244	11.5583	143.752	33.5421	16.2117	28.1607	15.5796	16.6827	581.139	143.862	326.336	302.734	112.776	310.332	250.716	139.311	150.242	1.10402e-07	2.41905e-06
Os01g0699100	115.395	26.314	25.043	81.2513	20.6413	30.397	35.4616	24.4822	23.1704	135.698	117.988	120.865	87.8596	103.109	112.75	162.395	68.6309	84.0731	1.1239e-07	2.46051e-06
[truncated: 3,145 more rows]
