# Supplementary material for: Transcriptome-derived networks reconstruct distinct immune strategies under different iron availability between Arabidopsis and rice
Source: Research Square preprint supplement (doi:10.21203/rs.3.rs-3214423/v1), 2024-07-15
Supplement: Supplementary file 10 [file a9451e865389517a8b6370ec.xlsx]

## Sheet: Arabidopsis
	GO biological process complete	Ref list	Input genes	Expected	FE	P	adjusted P
-Fe	amino acid import across plasma membrane (GO:0089718)	6	4	0.12	32.42	3.11e-05	0.00208
	release of seed from dormancy (GO:0048838)	5	3	0.1	29.18	0.000422	0.0204
	indole glucosinolate biosynthetic process (GO:0009759)	8	4	0.16	24.32	7.1e-05	0.00454
	L-alpha-amino acid transmembrane transport (GO:1902475)	9	4	0.19	21.62	0.000101	0.00618
	L-amino acid transport (GO:0015807)	10	4	0.21	19.45	0.000139	0.00818
	arabinan catabolic process (GO:0031222)	8	3	0.16	18.24	0.00119	0.0467
	salicylic acid biosynthetic process (GO:0009697)	8	3	0.16	18.24	0.00119	0.0464
	xylan catabolic process (GO:0045493)	16	4	0.33	12.16	0.000611	0.0279
	defense response by callose deposition in cell wall (GO:0052544)	16	4	0.33	12.16	0.000611	0.0277
	reactive nitrogen species metabolic process (GO:2001057)	16	4	0.33	12.16	0.000611	0.0272
	regulation of protein serine/threonine phosphatase activity (GO:0080163)	20	5	0.41	12.16	0.000124	0.00738
	anthocyanin-containing compound biosynthetic process (GO:0009718)	26	5	0.53	9.35	0.000359	0.0181
	cellular response to hypoxia (GO:0071456)	239	41	4.91	8.34	2.46e-23	6.89e-21
	auxin biosynthetic process (GO:0009851)	32	5	0.66	7.6	0.000834	0.0348
	induced systemic resistance (GO:0009682)	32	5	0.66	7.6	0.000834	0.0346
	hyperosmotic salinity response (GO:0042538)	59	9	1.21	7.42	8.79e-06	0.000672
	sesquiterpenoid metabolic process (GO:0006714)	34	5	0.7	7.15	0.00107	0.0424
	systemic acquired resistance (GO:0009627)	116	16	2.39	6.71	1.09e-08	1.15e-06
	response to oomycetes (GO:0002239)	105	14	2.16	6.48	1.32e-07	1.16e-05
	cold acclimation (GO:0009631)	62	8	1.27	6.28	8.14e-05	0.0051
	protein complex oligomerization (GO:0051259)	55	7	1.13	6.19	0.000245	0.0135
	response to molecule of bacterial origin (GO:0002237)	117	14	2.41	5.82	4.37e-07	3.68e-05
	response to hydrogen peroxide (GO:0042542)	76	8	1.56	5.12	0.000294	0.0155
	cellular response to nitrogen compound (GO:1901699)	67	7	1.38	5.08	0.000728	0.0313
	toxin metabolic process (GO:0009404)	118	12	2.43	4.95	1.33e-05	0.00099
	leaf senescence (GO:0010150)	187	19	3.84	4.94	4.38e-08	4.03e-06
	chaperone-mediated protein folding (GO:0061077)	69	7	1.42	4.93	0.000855	0.0352
	heat acclimation (GO:0010286)	70	7	1.44	4.86	0.000924	0.0375
	response to salicylic acid (GO:0009751)	440	43	9.05	4.75	4.38e-16	6.97e-14
	defense response to fungus (GO:0050832)	702	68	14.43	4.71	1.03e-24	3.79e-22
	response to wounding (GO:0009611)	815	61	16.76	3.64	3.77e-17	6.34e-15
	detoxification (GO:0098754)	157	11	3.23	3.41	0.000633	0.0276
	abscisic acid-activated signaling pathway (GO:0009738)	157	11	3.23	3.41	0.000633	0.0274
	response to chitin (GO:0010200)	308	21	6.33	3.32	3.99e-06	0.000317
	response to ethylene (GO:0009723)	242	15	4.98	3.01	0.000249	0.0136
	regulation of defense response (GO:0031347)	744	45	15.3	2.94	4.78e-10	5.63e-08
	response to jasmonic acid (GO:0009753)	606	29	12.46	2.33	4.57e-05	0.00296
suf	positive regulation of hydrogen peroxide metabolic process (GO:0010726)	5	3	0.08	35.55	0.000239	0.0133
	negative regulation of cytokinin-activated signaling pathway (GO:0080037)	6	3	0.1	29.62	0.000354	0.0188
	nitrate assimilation (GO:0042128)	12	5	0.2	24.69	6.47e-06	0.000495
	indole glucosinolate metabolic process (GO:0042343)	19	4	0.32	12.47	0.000517	0.0251
	regulation of protein serine/threonine phosphatase activity (GO:0080163)	20	4	0.34	11.85	0.000612	0.029
	suberin biosynthetic process (GO:0010345)	22	4	0.37	10.77	0.000839	0.0386
	cold acclimation (GO:0009631)	62	10	1.05	9.56	3.08e-07	3.02e-05
	defense response to insect (GO:0002213)	33	5	0.56	8.98	0.000394	0.0207
	cellular response to cold (GO:0070417)	35	5	0.59	8.46	0.000503	0.0255
	cellular response to hypoxia (GO:0071456)	239	32	4.03	7.93	4.06e-18	9.97e-16
	systemic acquired resistance (GO:0009627)	116	15	1.96	7.66	5.26e-09	6.45e-07
	hyperosmotic salinity response (GO:0042538)	59	7	1	7.03	0.000111	0.00667
	ethylene-activated signaling pathway (GO:0009873)	78	9	1.32	6.84	1.44e-05	0.000966
	toxin metabolic process (GO:0009404)	118	12	1.99	6.02	1.87e-06	0.000162
	glutamine family amino acid metabolic process (GO:0009064)	59	6	1	6.02	0.000731	0.0344
	response to molecule of bacterial origin (GO:0002237)	117	11	1.97	5.57	9.98e-06	0.000707
	response to salicylic acid (GO:0009751)	440	34	7.43	4.58	1.09e-12	1.69e-10
	leaf senescence (GO:0010150)	187	14	3.16	4.44	7.49e-06	0.000551
	response to wounding (GO:0009611)	815	61	13.76	4.43	2.42e-21	9.5e-19
	defense response to fungus (GO:0050832)	702	52	11.85	4.39	4.1e-18	9.66e-16
	immune system process (GO:0002376)	456	30	7.7	3.9	9.1e-10	1.19e-07
	response to oxidative stress (GO:0006979)	613	40	10.35	3.87	1.63e-12	2.47e-10
	abscisic acid-activated signaling pathway (GO:0009738)	157	10	2.65	3.77	0.000503	0.0257
	plant-type cell wall organization (GO:0009664)	175	10	2.95	3.39	0.00111	0.0489
	response to chitin (GO:0010200)	308	17	5.2	3.27	3.56e-05	0.0022
	negative regulation of DNA-templated transcription (GO:0045892)	248	13	4.19	3.11	0.000461	0.0238
	regulation of defense response (GO:0031347)	744	37	12.56	2.95	1.37e-08	1.58e-06
	response to jasmonic acid (GO:0009753)	606	28	10.23	2.74	3.21e-06	0.00027
	response to red or far red light (GO:0009639)	375	16	6.33	2.53	0.000928	0.0423
+Fe	negative regulation of DNA-templated transcription initiation (GO:2000143)	5	5	0.12	+	41.31	1.66e-06
	arabinan catabolic process (GO:0031222)	8	4	0.19	+	20.66	0.000132
	xylan catabolic process (GO:0045493)	16	5	0.39	+	12.91	0.000108
	anthocyanin-containing compound biosynthetic process (GO:0009718)	26	8	0.63	+	12.71	9.85e-07
	regulation of protein serine/threonine phosphatase activity (GO:0080163)	20	5	0.48	+	10.33	0.000261
	starch catabolic process (GO:0005983)	17	4	0.41	+	9.72	0.00134
	response to herbivore (GO:0080027)	17	4	0.41	+	9.72	0.00134
	regulation of flavonoid biosynthetic process (GO:0009962)	32	7	0.77	+	9.04	3.18e-05
	response to desiccation (GO:0009269)	25	5	0.61	+	8.26	0.000634
	jasmonic acid biosynthetic process (GO:0009695)	26	5	0.63	+	7.94	0.000742
	xyloglucan metabolic process (GO:0010411)	62	11	1.5	+	7.33	1.11e-06
	toxin catabolic process (GO:0009407)	46	7	1.11	+	6.29	0.000239
	cold acclimation (GO:0009631)	62	9	1.5	+	6	4.4e-05
	peptidyl-threonine dephosphorylation (GO:0035970)	46	6	1.11	+	5.39	0.00138
	abscisic acid-activated signaling pathway (GO:0009738)	157	20	3.8	+	5.26	8.59e-09
	protein complex oligomerization (GO:0051259)	55	7	1.33	+	5.26	0.000636
	negative regulation of abscisic acid-activated signaling pathway (GO:0009788)	58	7	1.4	+	4.99	0.000847
	hyperosmotic salinity response (GO:0042538)	59	7	1.43	+	4.9	0.000929
	response to hydrogen peroxide (GO:0042542)	76	9	1.84	+	4.89	0.000181
	response to sucrose (GO:0009744)	72	8	1.74	+	4.59	0.000606
	carbohydrate transport (GO:0008643)	64	7	1.55	+	4.52	0.00143
	plant-type cell wall modification (GO:0009827)	65	7	1.57	+	4.45	0.00156
	systemic acquired resistance (GO:0009627)	116	12	2.81	+	4.27	5.39e-05
	circadian rhythm (GO:0007623)	127	13	3.07	+	4.23	2.94e-05
	cellular response to hypoxia (GO:0071456)	239	21	5.79	+	3.63	1.16e-06
	response to red light (GO:0010114)	103	9	2.49	+	3.61	0.00138
	response to wounding (GO:0009611)	815	71	19.73	+	3.6	2.53e-19
	leaf senescence (GO:0010150)	187	16	4.53	+	3.53	2.89e-05
	indole-containing compound metabolic process (GO:0042430)	182	15	4.41	+	3.4	7.55e-05
	response to jasmonic acid (GO:0009753)	606	48	14.67	+	3.27	5.15e-12
	glucosinolate metabolic process (GO:0019760)	219	17	5.3	+	3.21	5.17e-05
	cellular response to starvation (GO:0009267)	175	13	4.24	+	3.07	0.000565
	defense response to fungus (GO:0050832)	702	48	16.99	+	2.82	5.59e-10
	response to salicylic acid (GO:0009751)	440	27	10.65	+	2.53	3.44e-05
	cell wall biogenesis (GO:0042546)	444	24	10.75	+	2.23	0.000524
	cellular amino acid metabolic process (GO:0006520)	566	30	13.7	+	2.19	0.000108
	response to nitrogen compound (GO:1901698)	790	40	19.12	+	2.09	2.27e-05

## Sheet: Rice
	GO biological process complete	Ref list	Input genes	Expected	FE	P	adjusted P
-Fe	response to salicylic acid (GO:0009751)	23	8	1.13	7.1	6.74e-05	0.00486
	systemic acquired resistance (GO:0009627)	23	8	1.13	7.1	6.74e-05	0.00478
	oxylipin biosynthetic process (GO:0031408)	32	8	1.57	5.1	0.000452	0.0246
	diterpenoid metabolic process (GO:0016101)	66	12	3.24	3.71	0.00026	0.0149
	carboxylic acid transport (GO:0046942)	68	12	3.33	3.6	0.000331	0.0185
	response to water deprivation (GO:0009414)	72	12	3.53	3.4	0.000523	0.0275
	ethylene-activated signaling pathway (GO:0009873)	66	11	3.24	3.4	0.000881	0.0409
	hydrogen peroxide catabolic process (GO:0042744)	146	24	7.16	3.35	1.41e-06	0.000138
	cellular oxidant detoxification (GO:0098869)	213	33	10.44	3.16	5.8e-08	7.77e-06
	recognition of pollen (GO:0048544)	107	16	5.24	3.05	0.000204	0.0124
	response to cold (GO:0009409)	94	14	4.61	3.04	0.000515	0.0274
	lipid transport (GO:0006869)	128	19	6.27	3.03	5.91e-05	0.00433
	photosynthesis (GO:0015979)	182	27	8.92	3.03	1.87e-06	0.000176
	amino acid transmembrane transport (GO:0003333)	90	13	4.41	2.95	0.00104	0.0467
	phenylpropanoid biosynthetic process (GO:0009699)	97	14	4.75	2.94	0.00068	0.0347
	response to oxidative stress (GO:0006979)	267	37	13.09	2.83	1.22e-07	1.54e-05
	cell surface receptor signaling pathway (GO:0007166)	262	35	12.84	2.73	5.72e-07	6.09e-05
	response to abscisic acid (GO:0009737)	157	19	7.7	2.47	0.000836	0.0392
	cellular response to oxygen-containing compound (GO:1901701)	236	27	11.57	2.33	0.000165	0.0103
suf	response to chitin (GO:0010200)	5	3	0.11	26.81	0.000539	0.0243
	positive regulation of organ growth (GO:0046622)	7	3	0.16	19.15	0.00112	0.0444
	cold acclimation (GO:0009631)	15	4	0.34	11.92	0.00068	0.029
	water transport (GO:0006833)	26	5	0.58	8.59	0.000527	0.0242
	ethylene-activated signaling pathway (GO:0009873)	66	11	1.48	7.45	9.36e-07	8.6e-05
	hydrogen peroxide catabolic process (GO:0042744)	146	20	3.27	6.12	8.2e-10	1.92e-07
	peptidyl-threonine dephosphorylation (GO:0035970)	44	6	0.98	6.09	0.000757	0.032
	response to water deprivation (GO:0009414)	72	9	1.61	5.59	7.09e-05	0.00396
	cellular oxidant detoxification (GO:0098869)	213	23	4.77	4.83	3.06e-09	5.13e-07
	abscisic acid-activated signaling pathway (GO:0009738)	81	8	1.81	4.41	0.000758	0.0317
	response to oxidative stress (GO:0006979)	267	24	5.98	4.02	3.67e-08	4.91e-06
	cell surface receptor signaling pathway (GO:0007166)	262	23	5.86	3.92	1.04e-07	1.16e-05
	organic acid transport (GO:0015849)	139	11	3.11	3.54	0.000493	0.0229
	response to bacterium (GO:0009617)	159	12	3.56	3.37	0.000416	0.0197
	defense response to other organism (GO:0098542)	282	20	6.31	3.17	1.38e-05	0.0009
	carboxylic acid biosynthetic process (GO:0046394)	403	20	9.02	2.22	0.00129	0.0499
+Fe	positive regulation of organ growth (GO:0046622)	7	4	0.24	16.61	0.000333	0.0155
	regulation of protein serine/threonine phosphatase activity (GO:0080163)	24	6	0.83	7.27	0.000401	0.0179
	response to hydrogen peroxide (GO:0042542)	29	6	1	6.01	0.000951	0.0374
	trehalose metabolic process (GO:0005991)	29	6	1	6.01	0.000951	0.0371
	ethylene-activated signaling pathway (GO:0009873)	66	11	2.27	4.84	4.74e-05	0.003
	glutathione metabolic process (GO:0006749)	68	11	2.34	4.7	6.03e-05	0.00372
	diterpenoid biosynthetic process (GO:0016102)	56	9	1.93	4.67	0.000291	0.0138
	hydrogen peroxide catabolic process (GO:0042744)	146	22	5.02	4.38	4.85e-08	6.14e-06
	cellular oxidant detoxification (GO:0098869)	213	29	7.33	3.96	3.07e-09	4.8e-07
	response to cold (GO:0009409)	94	12	3.23	3.71	0.000217	0.0112
	inorganic anion transport (GO:0015698)	94	11	3.23	3.4	0.00076	0.031
	cell surface receptor signaling pathway (GO:0007166)	262	30	9.01	3.33	5.79e-08	6.96e-06
	amino acid transport (GO:0006865)	98	11	3.37	3.26	0.00104	0.0396
	carboxylic acid transmembrane transport (GO:1905039)	111	12	3.82	3.14	0.000846	0.0342
	defense response to other organism (GO:0098542)	282	30	9.7	3.09	2.48e-07	2.7e-05
	response to alcohol (GO:0097305)	162	15	5.57	2.69	0.0009	0.0358
	metal ion transport (GO:0030001)	227	20	7.81	2.56	0.000253	0.0124
	organic acid biosynthetic process (GO:0016053)	426	30	14.66	2.05	0.000508	0.0218
