# Supplementary material for: Transcriptome-derived networks reconstruct distinct immune strategies under different iron availability between Arabidopsis and rice
Source: Research Square preprint supplement (doi:10.21203/rs.3.rs-3214423/v1), 2024-07-15
Supplement: Supplementary file 11 [file beb59d7dfaefa7accd02bebf.xlsx]

## Sheet: Os1
GO biological process complete	Ref list	Input genes	Expected	FE	P	adjusted P
rRNA processing (GO:0006364)	259	32	10.64	3.01	2.07e-07	2.55e-05
glycolytic process (GO:0006096)	78	15	3.2	4.68	3.55e-06	0.000268
lipid transport (GO:0006869)	128	19	5.26	3.61	5.78e-06	0.000387
response to reactive oxygen species (GO:0000302)	64	13	2.63	4.95	9.35e-06	0.000562
response to heat (GO:0009408)	105	16	4.31	3.71	2.31e-05	0.0012
chloroplast organization (GO:0009658)	122	17	5.01	3.39	3.63e-05	0.0017
malate metabolic process (GO:0006108)	19	7	0.78	8.97	4.99e-05	0.00225
cellular aldehyde metabolic process (GO:0006081)	52	10	2.14	4.68	0.000147	0.0059
chloroplast RNA processing (GO:0031425)	10	5	0.41	12.17	0.000205	0.00774
vitamin E biosynthetic process (GO:0010189)	10	5	0.41	12.17	0.000205	0.0078
cellular carbohydrate catabolic process (GO:0044275)	90	13	3.7	3.52	0.000211	0.00792
alcohol biosynthetic process (GO:0046165)	55	10	2.26	4.43	0.00022	0.00819
organophosphate biosynthetic process (GO:0090407)	374	32	15.36	2.08	0.000258	0.00924
water transport (GO:0006833)	26	7	1.07	6.56	0.000255	0.00925
glutathione metabolic process (GO:0006749)	68	11	2.79	3.94	0.000268	0.00952
photorespiration (GO:0009853)	18	6	0.74	8.12	0.000273	0.0096
serine family amino acid biosynthetic process (GO:0009070)	46	9	1.89	4.76	0.00028	0.00979
carotene biosynthetic process (GO:0016120)	11	5	0.45	11.07	0.000288	0.00986
polyol catabolic process (GO:0046174)	36	8	1.48	5.41	0.000288	0.00992
pyridine-containing compound metabolic process (GO:0072524)	48	9	1.97	4.57	0.000369	0.0121
water-soluble vitamin metabolic process (GO:0006767)	73	11	3	3.67	0.000461	0.0147
response to light stimulus (GO:0009416)	211	21	8.67	2.42	0.000469	0.0148
response to salt stress (GO:0009651)	99	13	4.07	3.2	0.000484	0.0152
regulation of photosynthesis, light reaction (GO:0042548)	13	5	0.53	9.37	0.000529	0.0164
cell redox homeostasis (GO:0045454)	30	7	1.23	5.68	0.000535	0.0164
amino acid transmembrane transport (GO:0003333)	90	12	3.7	3.25	0.000696	0.02
cysteine metabolic process (GO:0006534)	33	7	1.36	5.16	0.000873	0.0247
cold acclimation (GO:0009631)	15	5	0.62	8.12	0.000897	0.0249
circadian rhythm (GO:0007623)	24	6	0.99	6.09	0.000982	0.0269
gluconeogenesis (GO:0006094)	24	6	0.99	6.09	0.000982	0.0271
protein refolding (GO:0042026)	45	8	1.85	4.33	0.00105	0.0285
photosynthetic electron transport in photosystem I (GO:0009773)	16	5	0.66	7.61	0.00114	0.0307
cellular response to oxidative stress (GO:0034599)	46	8	1.89	4.23	0.00119	0.032
response to abscisic acid (GO:0009737)	157	16	6.45	2.48	0.00144	0.0369
carotenoid biosynthetic process (GO:0016117)	17	5	0.7	7.16	0.00143	0.0373
response to water deprivation (GO:0009414)	72	10	2.96	3.38	0.00144	0.0373
cellular detoxification (GO:1990748)	229	21	9.4	2.23	0.00148	0.0373
anion transport (GO:0006820)	203	19	8.34	2.28	0.00151	0.0376
inorganic ion transmembrane transport (GO:0098660)	369	29	15.15	1.91	0.00167	0.0409
cytokinin-activated signaling pathway (GO:0009736)	61	9	2.51	3.59	0.00169	0.0412
L-methionine salvage from methylthioadenosine (GO:0019509)	10	4	0.41	9.74	0.00176	0.042
homoserine metabolic process (GO:0009092)	18	5	0.74	6.76	0.00176	0.042
chaperone cofactor-dependent protein refolding (GO:0051085)	50	8	2.05	3.9	0.00191	0.0448
starch metabolic process (GO:0005982)	51	8	2.09	3.82	0.00214	0.0491
carbohydrate transmembrane transport (GO:0034219)	90	11	3.7	2.98	0.00215	0.0491

## Sheet: Os2
GO biological process complete	Ref list	Input genes	Expected	FE	P	adjusted P
L-serine biosynthetic process (GO:0006564)	6	3	0.04	78.24	2.07e-05	0.0242
intracellular sequestering of iron ion (GO:0006880)	11	3	0.07	42.68	8.75e-05	0.0513
transition metal ion transport (GO:0000041)	87	6	0.56	10.79	2.98e-05	0.0279
response to chemical (GO:0042221)	1296	24	8.28	2.9	4.66e-06	0.00728

## Sheet: Os3
GO biological process complete	Ref list	Input genes	Expected	FE	P	adjusted P
glutathione metabolic process (GO:0006749)	68	6	0.57	10.61	3.49e-05	0.0327
response to temperature stimulus (GO:0009266)	197	9	1.64	5.49	5.93e-05	0.0397
response to oxygen-containing compound (GO:1901700)	471	14	3.92	3.57	6.06e-05	0.0355

## Sheet: Os4
GO biological process complete	Ref list	Input genes	Expected	FE	P	adjusted P
cell surface receptor signaling pathway (GO:0007166)	262	30	8.67	3.46	2.52e-08	2.63e-06
ethylene-activated signaling pathway (GO:0009873)	66	14	2.18	6.41	2.34e-07	2.19e-05
cellular oxidant detoxification (GO:0098869)	213	24	7.05	3.41	7.89e-07	6.72e-05
response to oxidative stress (GO:0006979)	267	27	8.83	3.06	1.15e-06	8.82e-05
hydrogen peroxide catabolic process (GO:0042744)	146	18	4.83	3.73	5.95e-06	0.000377
protein autophosphorylation (GO:0046777)	67	11	2.22	4.96	3.8e-05	0.00184
glutamate catabolic process (GO:0006538)	9	5	0.3	16.8	5.25e-05	0.00241
ceramide biosynthetic process (GO:0046513)	18	6	0.6	10.08	8.74e-05	0.00369
sphingosine metabolic process (GO:0006670)	12	5	0.4	12.6	0.00015	0.00595
positive regulation of organ growth (GO:0046622)	7	4	0.23	17.28	0.000288	0.0102
regulation of protein serine/threonine phosphatase activity (GO:0080163)	24	6	0.79	7.56	0.000327	0.0114
monosaccharide metabolic process (GO:0005996)	157	15	5.19	2.89	0.000454	0.0151
response to fungus (GO:0009620)	77	10	2.55	3.93	0.000469	0.0155
phenylpropanoid metabolic process (GO:0009698)	163	15	5.39	2.78	0.00065	0.0203
positive regulation of response to salt stress (GO:1901002)	19	5	0.63	7.96	0.000854	0.0257
gibberellin metabolic process (GO:0009685)	30	6	0.99	6.05	0.000911	0.0269
brassinosteroid mediated signaling pathway (GO:0009742)	44	7	1.46	4.81	0.00115	0.0326
oxylipin biosynthetic process (GO:0031408)	32	6	1.06	5.67	0.00122	0.0341
olefinic compound biosynthetic process (GO:0120255)	32	6	1.06	5.67	0.00122	0.0343
regulation of small molecule metabolic process (GO:0062012)	46	7	1.52	4.6	0.00145	0.0397
peptidyl-tyrosine phosphorylation (GO:0018108)	93	10	3.08	3.25	0.00175	0.0471
systemic acquired resistance (GO:0009627)	23	5	0.76	6.57	0.00178	0.0473
response to salicylic acid (GO:0009751)	23	5	0.76	6.57	0.00178	0.0476

## Sheet: Os5
GO biological process complete	Ref list	Input genes	Expected	FE	P	adjusted P
response to inorganic substance (GO:0010035)	176	12	2.11	5.68	2.95e-06	0.00154
indole-containing compound metabolic process (GO:0042430)	33	5	0.4	12.62	8.37e-05	0.0231
alpha-amino acid metabolic process (GO:1901605)	273	12	3.28	3.66	0.000175	0.0411
response to bacterium (GO:0009617)	159	9	1.91	4.72	0.000194	0.0413
defense response to fungus (GO:0050832)	66	6	0.79	7.57	0.000218	0.0444
