# Supplementary material for: Transcriptome-derived networks reconstruct distinct immune strategies under different iron availability between Arabidopsis and rice
Source: Research Square preprint supplement (doi:10.21203/rs.3.rs-3214423/v1), 2024-07-15
Supplement: Supplementary file 12 [file bf3fa5e6ec9a33a01d648fa1.xlsx]

## Sheet: -Fe
Gene ID	Base mean	log2 FC	SE	Statistic	P	adjusted P
Os08g0231400	6267.95	-4.24846	0.300004	-14.1614	1.58892e-45	4.08034e-41
Os05g0177500	729.573	5.09058	0.370715	13.7318	6.5502e-43	8.41046e-39
Os06g0306300	1415.41	-3.92639	0.288627	-13.6037	3.80884e-42	3.26037e-38
Os01g0141000	2741.28	-4.33874	0.319897	-13.5629	6.64127e-42	4.26369e-38
Os04g0688100	3759.28	-4.8832	0.363622	-13.4293	4.07034e-41	2.09052e-37
Os08g0203400	653.734	-6.28712	0.470713	-13.3566	1.08444e-40	4.64142e-37
Os10g0370500	1287.21	-2.97132	0.226212	-13.1351	2.07235e-39	6.65224e-36
Os07g0617000	1892.63	-2.77049	0.21085	-13.1396	1.95206e-39	6.65224e-36
Os07g0537500	534.27	-3.40448	0.260529	-13.0676	5.04596e-39	1.43978e-35
Os07g0537600	314.57	-3.32966	0.257306	-12.9405	2.66046e-38	6.83206e-35
Os01g0192900	781.221	-8.03372	0.622612	-12.9033	4.31493e-38	1.00734e-34
Os10g0409400	983.973	-10.3435	0.908121	-11.39	4.6917e-30	1.00402e-26
Os03g0297600	2540.59	-2.83318	0.249702	-11.3463	7.7396e-30	1.52887e-26
Os12g0231000	649.529	3.21496	0.305273	10.5314	6.18845e-26	1.13514e-22
Os04g0489600	941.105	-3.70935	0.35745	-10.3772	3.1472e-25	5.388e-22
Os01g0326300	780.129	-6.95521	0.676214	-10.2855	8.19011e-25	1.31451e-21
Os12g0437800	48.5194	-23.9181	2.32697	-10.2787	8.79324e-25	1.3283e-21
Os06g0678500	171.819	4.09512	0.39996	10.2388	1.32851e-24	1.89534e-21
Os04g0611400	429.788	-3.84523	0.38742	-9.92523	3.23343e-23	4.37024e-20
Os02g0695800	675.248	-1.85993	0.18927	-9.82688	8.625e-23	1.10745e-19
Os05g0166300	136.384	-5.16929	0.530826	-9.73819	2.07203e-22	2.53379e-19
Os05g0149300	500.896	-2.77175	0.286812	-9.664	4.2878e-22	5.00503e-19
Os07g0542600	185.201	-5.13387	0.537416	-9.55289	1.26127e-21	1.40823e-18
Os09g0400400	251.017	-4.1835	0.440767	-9.49142	2.27914e-21	2.43868e-18
Os08g0249900	174.243	3.08874	0.328066	9.41499	4.73137e-21	4.86006e-18
Os04g0616500	686.033	-2.52338	0.272035	-9.27593	1.76075e-20	1.72442e-17
Os06g0554600	244.937	2.13594	0.230344	9.27281	1.81305e-20	1.72442e-17
Os03g0790700	421.456	-3.95617	0.430204	-9.19602	3.71461e-20	3.40683e-17
Os07g0687900	342.533	2.22277	0.243558	9.12626	7.09072e-20	6.27896e-17
Os09g0246300	1225.86	-3.30616	0.364443	-9.07181	1.17059e-19	1.00203e-16
Os04g0412500	965.404	2.11166	0.234929	8.98851	2.50599e-19	2.07593e-16
Os03g0242300	337.808	3.34567	0.373943	8.94701	3.65248e-19	2.93112e-16
Os04g0688300	627.751	-3.36245	0.378189	-8.89091	6.06121e-19	4.71672e-16
Os11g0226933	656.878	-4.14444	0.476974	-8.68902	3.6558e-18	2.7612e-15
Os01g0975900	2403.43	3.78172	0.438773	8.61885	6.763e-18	4.96211e-15
Os08g0508800	1860.68	-5.34149	0.623896	-8.5615	1.11405e-17	7.94692e-15
Os06g0707800	801.326	-1.94847	0.228062	-8.54362	1.30083e-17	9.02849e-15
Os03g0757200	951.847	4.71811	0.553916	8.51774	1.62692e-17	1.09945e-14
Os08g0465700	1301.55	-1.43902	0.170191	-8.45531	2.78345e-17	1.83279e-14
Os01g0326100	105.584	-6.05247	0.719515	-8.41187	4.03511e-17	2.46718e-14
Os01g0846300	284.641	2.61021	0.310167	8.4155	3.9122e-17	2.46718e-14
Os03g0684400	4431.7	1.39803	0.166162	8.4137	3.97291e-17	2.46718e-14
Os01g0953500	626.398	1.79569	0.217885	8.24143	1.70158e-16	1.0162e-13
Os01g0952500	1175.02	1.38575	0.168301	8.23378	1.81391e-16	1.05867e-13
Os07g0529600	50276.4	3.23168	0.393953	8.20321	2.34059e-16	1.3357e-13
Os03g0796600	2006.5	1.1579	0.141482	8.18412	2.74305e-16	1.53133e-13
Os09g0399800	191.784	-6.41806	0.784475	-8.18134	2.80697e-16	1.53368e-13
Os11g0250400	52.1816	-5.89566	0.725702	-8.12408	4.50782e-16	2.41169e-13
Os05g0311500	893.282	3.11736	0.384154	8.11486	4.86327e-16	2.54875e-13
Os06g0206900	174.116	2.41396	0.297778	8.10655	5.2076e-16	2.67462e-13
Os04g0316200	267.004	-4.17645	0.515974	-8.09431	5.75878e-16	2.89972e-13
Os02g0562600	110.403	-4.08125	0.505323	-8.0765	6.66496e-16	3.29147e-13
Os01g0268600	375.232	-2.20032	0.273151	-8.05534	7.92587e-16	3.84031e-13
Os03g0739700	161.482	-3.0542	0.379778	-8.04207	8.83345e-16	4.2008e-13
Os12g0576700	302.934	-3.55114	0.4429	-8.01793	1.07543e-15	4.96147e-13
Os03g0107800	1409.29	1.01601	0.126945	8.00357	1.20861e-15	5.44511e-13
Os03g0233000	89.4033	-4.23661	0.52951	-8.001	1.23408e-15	5.464e-13
Os01g0191200	5161.54	1.63937	0.205874	7.96295	1.67986e-15	7.18979e-13
Os11g0209000	2621.36	2.64309	0.331839	7.96495	1.65288e-15	7.18979e-13
Os04g0423400	2916.48	2.7424	0.346059	7.92464	2.28812e-15	9.6326e-13
Os03g0843800	881.646	4.36927	0.551782	7.91848	2.40435e-15	9.95864e-13
Os11g0256900	2823.56	-4.09528	0.519597	-7.88164	3.23104e-15	1.31703e-12
Os07g0251200	123.282	-3.29188	0.418591	-7.86418	3.71527e-15	1.49075e-12
Os07g0677200	3022.14	-3.42413	0.436051	-7.85259	4.07516e-15	1.61e-12
Os09g0356800	252.521	-4.86394	0.620511	-7.8386	4.55585e-15	1.77264e-12
Os08g0109300	2817.84	1.71105	0.219259	7.80378	6.0082e-15	2.30284e-12
Os09g0286600	2412.42	-2.28139	0.292692	-7.79453	6.46508e-15	2.44152e-12
Os02g0194700	11491	3.83807	0.493618	7.77538	7.52207e-15	2.79952e-12
Os08g0260600	201.261	-3.30867	0.429497	-7.70359	1.32295e-14	4.85333e-12
Os06g0561000	601.004	-2.27087	0.295038	-7.69689	1.39414e-14	4.98574e-12
Os06g0694200	180.539	5.36746	0.697385	7.69655	1.39787e-14	4.98574e-12
Os05g0553400	320.672	-2.2249	0.289432	-7.68712	1.50486e-14	5.2938e-12
Os02g0527600	2398.75	-2.36764	0.309481	-7.65037	2.00398e-14	6.95437e-12
Os04g0688500	2204.04	-4.65241	0.609134	-7.63774	2.21076e-14	7.56964e-12
Os03g0232400	354.56	2.50674	0.329667	7.60384	2.87482e-14	9.71386e-12
Os10g0370400	153.934	-1.67228	0.220237	-7.59309	3.12364e-14	1.04175e-11
Os01g0695300	1082.57	2.26954	0.299361	7.58128	3.42175e-14	1.12655e-11
Os07g0412100	7676.41	1.61216	0.213271	7.55922	4.05489e-14	1.3181e-11
Os01g0963000	1366.13	-4.05175	0.537715	-7.53513	4.87839e-14	1.56596e-11
Os07g0539900	855.497	-5.04107	0.669592	-7.52856	5.13013e-14	1.62644e-11
Os03g0150600	1857.24	-2.781	0.370046	-7.5153	5.67819e-14	1.77824e-11
Os01g0940700	1707.75	-4.69931	0.627094	-7.49379	6.69131e-14	2.07028e-11
Os05g0395000	2759.32	1.89749	0.253379	7.48872	6.95479e-14	2.12618e-11
Os02g0822900	77.811	-4.61989	0.617479	-7.48186	7.3277e-14	2.21383e-11
Os07g0680400	105.425	-3.32403	0.444423	-7.47944	7.46421e-14	2.22885e-11
Os10g0148400	421.333	2.33178	0.312047	7.47251	7.86801e-14	2.32242e-11
Os12g0586300	294.683	1.10273	0.148589	7.42135	1.15931e-13	3.34867e-11
Os09g0412700	466.08	2.1863	0.294602	7.42121	1.16056e-13	3.34867e-11
Os11g0618700	541.178	-1.9659	0.265594	-7.40191	1.34243e-13	3.83041e-11
Os03g0134300	3344.16	1.18145	0.159963	7.38574	1.51606e-13	4.27829e-11
Os03g0729000	1234.52	3.27087	0.444151	7.36432	1.78055e-13	4.97006e-11
Os01g0140700	79.3182	-4.88648	0.663986	-7.3593	1.84876e-13	5.10498e-11
Os07g0654500	96.0746	-4.7085	0.640726	-7.34869	2.00156e-13	5.46809e-11
Os03g0650200	316.068	3.30386	0.451747	7.31352	2.60241e-13	7.03472e-11
Os04g0244800	2345.26	3.12907	0.428284	7.30607	2.7506e-13	7.35785e-11
Os04g0469000	2891.74	-3.62029	0.495854	-7.30113	2.85366e-13	7.55484e-11
Os10g0562100	2183.64	1.08225	0.148745	7.27583	3.44298e-13	8.93088e-11
Os09g0438100	831.576	3.53318	0.485519	7.27713	3.41004e-13	8.93088e-11
Os12g0133100	302.94	2.61593	0.359774	7.27102	3.56786e-13	9.16227e-11
Os02g0608000	99.5945	7.34777	1.0125	7.25706	3.95605e-13	9.96964e-11
Os06g0228200	1426.91	1.4061	0.19376	7.25692	3.95991e-13	9.96964e-11
Os04g0119400	2063.37	-1.18569	0.163421	-7.25539	4.00515e-13	9.98567e-11
Os07g0628900	1495.92	3.8928	0.537223	7.24615	4.28791e-13	1.05878e-10
Os01g0580500	455.43	-1.89978	0.2626	-7.23452	4.67195e-13	1.14137e-10
Os05g0427400	383.791	-3.44424	0.476159	-7.23338	4.71125e-13	1.14137e-10
Os10g0159800	1328.25	1.26591	0.175056	7.23145	4.77856e-13	1.14685e-10
Os11g0156300	102.868	-2.22736	0.309459	-7.19762	6.12745e-13	1.45697e-10
Os09g0491820	1088.71	1.63555	0.227465	7.19033	6.4634e-13	1.52275e-10
Os04g0616700	919.764	-2.32195	0.323408	-7.17964	6.98967e-13	1.63177e-10
Os11g0669100	151.832	-3.68064	0.514042	-7.1602	8.05614e-13	1.8638e-10
Os06g0110000	571.06	-1.95805	0.274133	-7.14269	9.15213e-13	2.07988e-10
Os07g0491800	684.327	2.44009	0.34212	7.13227	9.8729e-13	2.224e-10
Os01g0975300	1374.96	-3.34912	0.469761	-7.12941	1.00799e-12	2.22715e-10
Os12g0628100	675.8	1.70746	0.239526	7.1285	1.01471e-12	2.22715e-10
Os03g0654400	806.566	-1.69998	0.238399	-7.13081	9.97815e-13	2.22715e-10
Os07g0178700	606.249	3.15731	0.444221	7.10752	1.18146e-12	2.57119e-10
Os04g0127100	39.5465	-9.30284	1.30912	-7.1062	1.19283e-12	2.57412e-10
Os07g0561800	134.906	-2.71839	0.383086	-7.09605	1.28376e-12	2.74725e-10
Os02g0563000	45.5035	9.17978	1.29416	7.09324	1.31011e-12	2.78046e-10
Os08g0138900	2894.91	2.58241	0.364282	7.08905	1.35036e-12	2.84241e-10
Os04g0295400	222.84	1.71515	0.242597	7.06997	1.54962e-12	3.23531e-10
Os09g0460500	869.583	2.36312	0.334946	7.05521	1.72346e-12	3.56923e-10
Os09g0272000	857.287	2.79719	0.398052	7.02719	2.10731e-12	4.32926e-10
Os06g0228500	173.984	2.44724	0.349463	7.00285	2.50816e-12	5.11187e-10
Os11g0644600	1032.02	1.34387	0.191997	6.99946	2.56959e-12	5.19582e-10
Os04g0340300	250.757	-3.90669	0.559487	-6.98263	2.89703e-12	5.81217e-10
Os03g0225900	312.36	-2.79035	0.399878	-6.97802	2.99374e-12	5.95964e-10
Os11g0489250	1017.27	3.50186	0.501969	6.97625	3.03164e-12	5.98866e-10
Os08g0351200	954.719	-2.42978	0.349083	-6.96047	3.39144e-12	6.64826e-10
Os01g0816100	177.189	-2.9377	0.423193	-6.94175	3.87268e-12	7.53412e-10
Os11g0541600	227.187	-2.69216	0.387996	-6.93862	3.95942e-12	7.5879e-10
Os02g0823100	1266.06	2.92906	0.422136	6.93865	3.95859e-12	7.5879e-10
Os01g0813800	1054.85	-1.64175	0.236683	-6.93649	4.01954e-12	7.64607e-10
Os11g0614500	539.714	-1.99124	0.287615	-6.92329	4.41279e-12	8.27156e-10
Os07g0409900	565.77	-1.09951	0.158799	-6.92391	4.39359e-12	8.27156e-10
Os08g0378000	459.759	-3.2446	0.469236	-6.91464	4.69056e-12	8.72853e-10
Os09g0536400	264.767	1.02043	0.147708	6.90843	4.90044e-12	9.05347e-10
Os10g0109300	5058.4	-2.07937	0.301517	-6.89635	5.33563e-12	9.78707e-10
Os10g0376900	71.0254	-4.56246	0.662285	-6.88897	5.6199e-12	1.02354e-09
Os06g0649000	137.218	-4.78916	0.696339	-6.87762	6.08605e-12	1.10063e-09
Os12g0263600	327.761	1.39641	0.203492	6.86226	6.77773e-12	1.21715e-09
Os04g0680400	656.9	-2.27498	0.331681	-6.85893	6.938e-12	1.23728e-09
Os05g0278500	101.529	-2.95756	0.432443	-6.83918	7.96462e-12	1.4009e-09
Os07g0538700	93.6101	-2.15538	0.315123	-6.83981	7.92994e-12	1.4009e-09
Os08g0139100	3933.26	1.25708	0.183981	6.83265	8.33618e-12	1.45628e-09
Os09g0478300	1216.88	3.69427	0.54149	6.82241	8.95276e-12	1.55343e-09
Os12g0547600	527.883	-2.7931	0.410281	-6.80778	9.91167e-12	1.70827e-09
Os09g0570800	72.3356	-7.82183	1.15142	-6.79319	1.09683e-11	1.87777e-09
Os01g0916100	102.596	-6.1999	0.914713	-6.77797	1.21872e-11	2.07263e-09
Os01g0713200	1140.35	-4.44434	0.656431	-6.77046	1.28373e-11	2.15465e-09
Os09g0339000	316.499	-2.89614	0.427743	-6.77076	1.2811e-11	2.15465e-09
Os02g0579800	870.431	-1.86636	0.27604	-6.7612	1.36851e-11	2.28204e-09
Os08g0355400	2200.24	-2.41653	0.357505	-6.75941	1.38552e-11	2.29549e-09
Os05g0136200	364.075	-1.56233	0.231283	-6.75506	1.42773e-11	2.35027e-09
Os02g0327500	150.571	-3.48778	0.516783	-6.74902	1.48848e-11	2.43466e-09
Os01g0974200	6311.56	2.17501	0.323187	6.72991	1.69772e-11	2.75934e-09
Os06g0661900	362.809	-1.23346	0.18357	-6.71931	1.82589e-11	2.94898e-09
Os02g0651900	213.062	2.89216	0.430548	6.71738	1.85016e-11	2.96951e-09
Os03g0235000	181.749	-3.61369	0.539616	-6.69679	2.13048e-11	3.39818e-09
Os08g0171700	263.871	1.60209	0.239371	6.69293	2.18743e-11	3.46748e-09
Os03g0183000	915.272	-2.72612	0.408407	-6.67502	2.4719e-11	3.89439e-09
Os05g0150733	99.4817	1.66912	0.250458	6.66428	2.65967e-11	4.16465e-09
Os09g0481700	1824.69	-1.34424	0.201874	-6.65881	2.76054e-11	4.29641e-09
Os01g0706900	222.928	2.26837	0.341184	6.6485	2.96089e-11	4.57614e-09
Os05g0217700	10608.8	2.90573	0.437099	6.64776	2.97592e-11	4.57614e-09
Os07g0115500	289.729	4.54506	0.686003	6.62543	3.46242e-11	5.29256e-09
Os06g0520733	48.0778	4.67488	0.707174	6.61065	3.82643e-11	5.81436e-09
Os01g0810300	2850.92	1.47358	0.223197	6.60213	4.05281e-11	6.12212e-09
Os09g0541000	1963.02	2.2674	0.344739	6.57715	4.79537e-11	7.20147e-09
Os02g0744900	17697.9	1.17394	0.178993	6.55856	5.43316e-11	7.97767e-09
Os04g0556500	144.984	-3.05347	0.465428	-6.56055	5.3609e-11	7.97767e-09
Os07g0178800	337.056	3.85082	0.587153	6.55846	5.4365e-11	7.97767e-09
Os08g0140500	115.522	-2.38369	0.36345	-6.55852	5.4344e-11	7.97767e-09
Os05g0181700	81.8442	-2.84075	0.433455	-6.55374	5.61138e-11	8.18751e-09
Os08g0202300	4600.55	-2.95077	0.451805	-6.53108	6.52989e-11	9.47388e-09
Os11g0567600	49.67	-4.65014	0.712297	-6.52838	6.64844e-11	9.59169e-09
Os08g0547300	132.013	2.14307	0.328334	6.52711	6.70506e-11	9.61933e-09
Os04g0423100	502.211	2.17912	0.333923	6.52581	6.76355e-11	9.64933e-09
Os01g0827800	45.0737	-8.42103	1.294	-6.50775	7.62863e-11	1.08234e-08
Os01g0229600	570.418	2.86149	0.44052	6.49571	8.26429e-11	1.16608e-08
Os11g0569500	93.1436	-3.96249	0.610167	-6.49411	8.35242e-11	1.17208e-08
Os03g0194900	1513.38	-1.57417	0.242613	-6.48838	8.67665e-11	1.21096e-08
Os06g0522300	73.1788	-4.9133	0.757348	-6.4875	8.72703e-11	1.21141e-08
Os04g0127200	1068.21	-2.3296	0.359489	-6.48031	9.15344e-11	1.26377e-08
Os11g0156600	59.3647	-4.45574	0.690201	-6.45571	1.0771e-10	1.47914e-08
Os05g0113400	1331.24	1.32605	0.20554	6.45155	1.10713e-10	1.51229e-08
Os02g0606800	452.928	-1.79616	0.278453	-6.4505	1.11482e-10	1.51474e-08
Os10g0570200	69.0791	-5.91538	0.918232	-6.44213	1.17804e-10	1.58601e-08
Os11g0278300	180.615	-3.51124	0.54515	-6.44086	1.18801e-10	1.58601e-08
Os05g0548900	2459.13	2.71121	0.420888	6.44163	1.18194e-10	1.58601e-08
Os09g0319800	59.6852	-8.71203	1.35273	-6.44035	1.19198e-10	1.58601e-08
Os11g0214400	33.1054	-4.64451	0.722248	-6.43063	1.27079e-10	1.68215e-08
Os01g0778800	710.416	-1.27274	0.198086	-6.42519	1.31709e-10	1.7345e-08
Os01g0136700	49.0758	-3.67883	0.572751	-6.42309	1.33533e-10	1.74955e-08
Os01g0898800	647.92	1.20674	0.188097	6.4155	1.40358e-10	1.82964e-08
Os10g0209700	1242.29	2.11095	0.329429	6.40792	1.47519e-10	1.91328e-08
Os04g0370900	472.803	-3.88758	0.607353	-6.40085	1.54516e-10	1.99396e-08
Os05g0365600	687.816	1.53561	0.240272	6.39113	1.64666e-10	2.11431e-08
Os02g0475400	2136.51	2.109	0.330474	6.38172	1.75108e-10	2.2372e-08
Os11g0298000	74.8758	-9.1365	1.43729	-6.35677	2.06041e-10	2.61937e-08
Os11g0565000	51.9044	-3.4162	0.537955	-6.35035	2.14828e-10	2.71763e-08
Os10g0552600	49.8559	-6.12055	0.966028	-6.33579	2.36135e-10	2.94367e-08
Os05g0531000	214.534	2.91218	0.45992	6.33193	2.42107e-10	3.00353e-08
Os12g0556500	109.373	-2.95281	0.466812	-6.32548	2.5244e-10	3.11666e-08
Os07g0530700	651.798	1.31331	0.207956	6.31531	2.69613e-10	3.31276e-08
Os11g0569600	121.7	-2.91993	0.462641	-6.31145	2.7643e-10	3.38034e-08
Os04g0585200	2432.18	1.38883	0.220411	6.30111	2.95513e-10	3.59658e-08
Os01g0677900	118.142	-3.42932	0.54472	-6.29557	3.06272e-10	3.70994e-08
Os03g0432100	382.827	-2.34335	0.373267	-6.27795	3.43056e-10	4.136e-08
Os02g0128000	97.9323	2.46778	0.393237	6.27555	3.48412e-10	4.16149e-08
Os07g0245200	263.351	-2.00633	0.319683	-6.276	3.47403e-10	4.16149e-08
Os09g0472900	106.019	-5.33871	0.850952	-6.27381	3.52329e-10	4.16949e-08
Os01g0138500	276.639	1.81538	0.29002	6.2595	3.86202e-10	4.54939e-08
Os02g0787600	444.714	-2.12408	0.339395	-6.25843	3.88879e-10	4.56e-08
Os02g0759900	1580.32	1.45378	0.232554	6.25138	4.06851e-10	4.74906e-08
Os02g0712700	300.884	-1.61431	0.258434	-6.24652	4.19707e-10	4.85356e-08
Os03g0371400	270.591	4.15765	0.665558	6.24687	4.18768e-10	4.85356e-08
Os04g0585900	33.92	4.92528	0.792352	6.21603	5.09901e-10	5.79893e-08
Os04g0684900	317.831	-3.49923	0.56285	-6.21698	5.06827e-10	5.79893e-08
Os05g0426200	3508.61	-1.24028	0.199534	-6.21589	5.10342e-10	5.79893e-08
Os08g0444440	27.1597	2.70136	0.435774	6.19899	5.6828e-10	6.42883e-08
Os04g0365100	31.257	-5.93625	0.958053	-6.19616	5.78587e-10	6.48825e-08
Os09g0425200	31.7792	8.63895	1.3942	6.19634	5.779e-10	6.48825e-08
Os03g0609500	447.953	1.56427	0.252581	6.19314	5.89771e-10	6.58492e-08
Os08g0452900	619.186	-1.52968	0.247047	-6.19185	5.94635e-10	6.61049e-08
Os01g0392600	135.185	-2.46604	0.39844	-6.18924	6.04561e-10	6.69187e-08
Os11g0559200	170.603	-1.47651	0.238822	-6.18248	6.31006e-10	6.95461e-08
Os01g0670100	164.029	-3.5254	0.570905	-6.17511	6.6119e-10	7.25614e-08
Os12g0210400	2817.84	-1.84498	0.29888	-6.17298	6.70143e-10	7.3231e-08
Os11g0625900	67.4535	-4.80965	0.779363	-6.17126	6.77498e-10	7.37209e-08
Os01g0223900	70.5201	-2.84622	0.461591	-6.1661	6.9994e-10	7.5207e-08
Os04g0405900	1925.48	-1.58446	0.256917	-6.16722	6.95e-10	7.5207e-08
Os06g0288100	691.698	-2.22254	0.360415	-6.16662	6.97667e-10	7.5207e-08
Os08g0190100	19.2516	-8.11429	1.31691	-6.1616	7.20145e-10	7.70555e-08
Os08g0517200	1411.85	-1.8522	0.300797	-6.15765	7.38328e-10	7.86733e-08
Os12g0431100	179.541	-5.1139	0.830869	-6.15488	7.51341e-10	7.97291e-08
Os07g0507000	831.509	-1.46514	0.238254	-6.14947	7.77432e-10	8.21582e-08
Os05g0527900	22.0249	8.09894	1.31724	6.14839	7.82719e-10	8.23779e-08
Os03g0102700	107.837	-2.43013	0.39573	-6.14087	8.20691e-10	8.60218e-08
Os03g0298300	539.731	1.3	0.211814	6.13748	8.38421e-10	8.69819e-08
Os06g0551800	96.5128	-2.39622	0.390438	-6.13725	8.39609e-10	8.69819e-08
Os08g0465800	1686.16	1.48607	0.242142	6.13718	8.40012e-10	8.69819e-08
Os03g0201901	55.1606	-2.79475	0.455499	-6.13557	8.48524e-10	8.75105e-08
Os09g0497000	440.536	1.41718	0.231681	6.11693	9.5396e-10	9.79908e-08
Os08g0189900	32.1641	-8.8225	1.44659	-6.09885	1.06836e-09	1.09305e-07
Os07g0603300	981.17	-2.39532	0.392812	-6.09789	1.07477e-09	1.09524e-07
Os06g0521500	63.9743	-6.85637	1.12605	-6.08884	1.13729e-09	1.15437e-07
Os03g0655400	6871.01	1.59178	0.261603	6.08471	1.16704e-09	1.17991e-07
Os01g0609900	446.339	-2.72291	0.447777	-6.08096	1.19465e-09	1.20309e-07
Os01g0618100	1903.42	1.11922	0.184166	6.07726	1.22256e-09	1.22638e-07
Os05g0116000	2243.52	1.43293	0.235828	6.07615	1.23104e-09	1.23008e-07
Os09g0272900	2856.22	-2.30479	0.379446	-6.07408	1.247e-09	1.2412e-07
Os03g0228200	1192.21	2.52155	0.415223	6.07277	1.25726e-09	1.24658e-07
Os04g0481300	239.841	1.39057	0.229216	6.06664	1.30616e-09	1.29008e-07
Os10g0469700	310.785	-2.08623	0.34393	-6.06585	1.31255e-09	1.29143e-07
Os01g0878000	342.369	1.68147	0.277232	6.06522	1.31771e-09	1.29156e-07
Os03g0625300	27.4652	4.54022	0.74991	6.05435	1.40987e-09	1.37142e-07
Os11g0204800	534.585	1.07836	0.178303	6.04788	1.46762e-09	1.42221e-07
Os12g0170300	336.136	1.05268	0.174233	6.04178	1.52427e-09	1.47155e-07
Os11g0474900	20.3221	-8.13541	1.34743	-6.03774	1.5629e-09	1.50319e-07
Os01g0830700	797.336	-1.63541	0.27121	-6.03005	1.6391e-09	1.5706e-07
Os11g0547000	428.529	1.66525	0.276771	6.01672	1.77988e-09	1.69915e-07
Os03g0244700	98.8659	-2.16543	0.360124	-6.01301	1.82112e-09	1.7257e-07
Os08g0337700	548.633	-1.04858	0.174368	-6.01361	1.81441e-09	1.7257e-07
Os03g0388100	634.027	1.30755	0.217477	6.01236	1.82844e-09	1.72626e-07
Os01g0192300	642.523	1.51851	0.252656	6.01018	1.85314e-09	1.74317e-07
Os03g0195300	122.654	2.77599	0.462027	6.00829	1.87488e-09	1.75718e-07
Os10g0205700	1113.18	2.06739	0.344313	6.00439	1.9205e-09	1.79339e-07
Os03g0703200	1677.38	-1.1007	0.183394	-6.00182	1.95118e-09	1.81545e-07
Os10g0389150	204.6	1.63067	0.271836	5.99873	1.98867e-09	1.84365e-07
Os11g0567800	60.4392	-4.63369	0.772924	-5.99501	2.03473e-09	1.87956e-07
Os02g0484975	55.7464	2.91755	0.487393	5.98604	2.15012e-09	1.97903e-07
Os02g0683800	74.0051	-2.39592	0.40046	-5.98292	2.19173e-09	2.01013e-07
Os07g0539100	651.821	-2.66103	0.445046	-5.97922	2.24205e-09	2.04897e-07
Os09g0353200	61.0926	-4.17161	0.698965	-5.96827	2.39787e-09	2.18359e-07
Os05g0398000	282.033	-1.63775	0.274561	-5.96497	2.4468e-09	2.22028e-07
Os02g0197200	592.659	2.67899	0.449341	5.96205	2.49094e-09	2.25237e-07
Os11g0428500	25.7614	3.75948	0.632231	5.94637	2.74154e-09	2.47027e-07
Os03g0748900	560.373	-1.07546	0.181067	-5.93956	2.85782e-09	2.55817e-07
Os07g0150700	666.352	-1.68907	0.28438	-5.9395	2.85901e-09	2.55817e-07
Os05g0116100	1215.73	1.92402	0.324088	5.9367	2.90814e-09	2.59309e-07
Os09g0325700	133.105	4.02461	0.678157	5.93463	2.94512e-09	2.61698e-07
Os08g0482700	6063.76	-1.69644	0.287753	-5.89548	3.736e-09	3.30829e-07
Os12g0115500	4208.39	1.39945	0.237652	5.88867	3.89311e-09	3.41752e-07
Os03g0676400	37.4169	-3.60262	0.611815	-5.88841	3.89927e-09	3.41752e-07
Os12g0448900	367.894	-2.0022	0.340611	-5.87828	4.14561e-09	3.62106e-07
Os01g0583100	974.596	2.09456	0.356539	5.87468	4.23653e-09	3.68794e-07
Os07g0635700	940.819	1.42349	0.24282	5.86235	4.56371e-09	3.95932e-07
Os08g0409100	1465.42	1.80038	0.30738	5.85718	4.70791e-09	4.07014e-07
Os12g0136500	2314.04	-1.11961	0.191222	-5.85503	4.76927e-09	4.08249e-07
Os04g0117900	841.607	-2.12132	0.362289	-5.85535	4.7602e-09	4.08249e-07
Os10g0465700	482.766	2.22283	0.379716	5.85393	4.80085e-09	4.0865e-07
Os03g0289800	28.5731	-4.28655	0.732273	-5.85376	4.80578e-09	4.0865e-07
Os07g0603800	939.078	-1.64706	0.282254	-5.83539	5.36661e-09	4.54833e-07
Os05g0161500	5989.15	2.45115	0.420177	5.83361	5.4242e-09	4.58202e-07
Os12g0277000	301.494	-1.91931	0.329435	-5.82607	5.67473e-09	4.77794e-07
Os07g0572300	200.914	1.15122	0.197619	5.82544	5.6961e-09	4.78026e-07
Os02g0813600	151.282	-2.8617	0.491299	-5.82477	5.71924e-09	4.78404e-07
Os04g0565500	877.035	-1.97382	0.338965	-5.82309	5.77686e-09	4.81655e-07
Os04g0515900	55.8264	-3.21172	0.55197	-5.81864	5.93284e-09	4.91469e-07
Os08g0472800	101.957	2.47677	0.425652	5.81876	5.92873e-09	4.91469e-07
Os01g0564300	389.642	-3.38976	0.582988	-5.81447	6.08275e-09	5.02267e-07
Os06g0218900	46.478	-3.93721	0.678169	-5.80565	6.41163e-09	5.27726e-07
Os11g0431700	55.8606	3.02236	0.52073	5.80408	6.47209e-09	5.31001e-07
Os12g0242500	212.054	2.00132	0.345008	5.80079	6.60027e-09	5.39793e-07
Os11g0625801	35.7121	-6.90607	1.19225	-5.79245	6.93653e-09	5.65492e-07
Os09g0350900	116.152	-3.18071	0.549434	-5.78908	7.07744e-09	5.75154e-07
Os04g0532400	1057.53	2.45825	0.424769	5.78727	7.15401e-09	5.79542e-07
Os03g0187800	17.4144	-7.75528	1.34141	-5.78142	7.4071e-09	5.98158e-07
Os04g0444800	6446.46	1.1027	0.190808	5.77908	7.51111e-09	6.04656e-07
Os07g0628700	3682.43	3.0398	0.526231	5.77656	7.62434e-09	6.11854e-07
Os02g0206700	979.763	2.05177	0.355831	5.76613	8.11148e-09	6.48919e-07
Os05g0397300	1221.42	-1.27722	0.221905	-5.75572	8.62742e-09	6.8805e-07
Os01g0122000	168.345	2.41555	0.420004	5.75125	8.85852e-09	7.03042e-07
Os05g0256500	191.217	-1.73066	0.30093	-5.75103	8.87016e-09	7.03042e-07
Os08g0384500	1018.87	-2.87314	0.499936	-5.747	9.08381e-09	7.17761e-07
Os02g0221100	25.7707	-3.39129	0.590661	-5.74151	9.38383e-09	7.39193e-07
Os02g0199200	172.539	-2.01368	0.350939	-5.73797	9.582e-09	7.52494e-07
Os04g0565400	720.76	-1.58828	0.276938	-5.73514	9.74327e-09	7.62827e-07
Os05g0457200	33.6401	3.10934	0.542334	5.73325	9.85233e-09	7.69021e-07
Os05g0202800	425.515	5.20374	0.90851	5.72778	1.01756e-08	7.89465e-07
Os07g0106200	1513.26	-2.56179	0.447258	-5.72777	1.01757e-08	7.89465e-07
Os04g0401700	697.27	-2.86944	0.5013	-5.72401	1.04038e-08	8.04728e-07
Os07g0661000	257.424	1.71867	0.300283	5.7235	1.04354e-08	8.04746e-07
Os11g0474800	68.584	-3.97392	0.695043	-5.71752	1.08087e-08	8.31039e-07
Os02g0726600	1083.25	1.05056	0.183851	5.71419	1.1023e-08	8.44985e-07
Os01g0194600	216.236	2.55268	0.44702	5.71045	1.1268e-08	8.61196e-07
Os08g0562600	3101.22	-1.33335	0.233789	-5.70323	1.17558e-08	8.95814e-07
Os07g0416700	74.0326	-1.93371	0.339399	-5.69745	1.21615e-08	9.23983e-07
Os09g0294000	10813	1.9259	0.338257	5.6936	1.24388e-08	9.4227e-07
Os03g0805400	360.828	-1.663	0.292385	-5.68769	1.28768e-08	9.72574e-07
Os03g0821100	976.721	1.47928	0.26015	5.68626	1.29853e-08	9.77896e-07
Os01g0940800	394.383	-3.68546	0.648316	-5.68466	1.3107e-08	9.84173e-07
Os09g0272200	86.8147	3.10791	0.5471	5.68069	1.34153e-08	1.00439e-06
Os10g0513200	194.229	1.31658	0.232099	5.6725	1.40727e-08	1.05055e-06
Os12g0105300	1691.38	1.16651	0.205841	5.66703	1.45295e-08	1.0815e-06
Os03g0329700	727.24	-1.10545	0.195292	-5.6605	1.50929e-08	1.12019e-06
Os06g0120200	258.747	1.86719	0.330508	5.64946	1.60951e-08	1.18933e-06
Os08g0428400	1407.15	-1.27951	0.226723	-5.64348	1.66651e-08	1.22274e-06
Os04g0691900	87.8757	3.63346	0.644226	5.64004	1.70016e-08	1.24387e-06
Os01g0870400	15.8691	7.43338	1.31957	5.63318	1.76921e-08	1.29072e-06
Os05g0574400	10221.8	1.45168	0.257748	5.63218	1.77941e-08	1.29448e-06
Os09g0535900	2019.63	2.03262	0.36103	5.63004	1.80163e-08	1.30694e-06
Os05g0149400	173.456	-2.51806	0.447815	-5.62299	1.87685e-08	1.35767e-06
Os01g0837000	254.64	-2.15434	0.383697	-5.61468	1.96926e-08	1.41655e-06
Os02g0791300	73.9278	-3.48181	0.620098	-5.61493	1.96637e-08	1.41655e-06
Os03g0126700	595.821	2.12977	0.380018	5.60438	2.09005e-08	1.49505e-06
Os05g0375400	11450.5	-1.99135	0.355486	-5.60178	2.1216e-08	1.51292e-06
Os07g0532500	194.519	1.71768	0.306655	5.60136	2.1268e-08	1.51292e-06
Os09g0357400	340.783	-3.36718	0.601295	-5.59988	2.14496e-08	1.52162e-06
Os12g0467300	283.664	-1.34339	0.240124	-5.59455	2.21196e-08	1.56482e-06
Os03g0382100	1561.04	-1.94058	0.347696	-5.58125	2.38791e-08	1.68004e-06
Os03g0572250	168.146	1.56944	0.281225	5.58072	2.39525e-08	1.6806e-06
Os02g0681200	411.591	-1.60445	0.287557	-5.57958	2.41101e-08	1.68705e-06
Os08g0407600	2928.66	1.77134	0.317616	5.57698	2.44734e-08	1.70782e-06
Os01g0238500	11867	1.58546	0.284518	5.57243	2.5121e-08	1.73416e-06
Os03g0264400	864.121	-1.42765	0.256199	-5.57243	2.51211e-08	1.73416e-06
Os05g0473000	16.2267	-7.36734	1.32205	-5.57266	2.50882e-08	1.73416e-06
Os06g0618700	596.575	-1.32323	0.237615	-5.56878	2.5653e-08	1.76614e-06
Os05g0111200	355.872	1.09705	0.197024	5.56809	2.5755e-08	1.76842e-06
Os01g0511000	571.046	-1.68829	0.303536	-5.56207	2.66587e-08	1.82559e-06
Os07g0493800	22.689	-4.66716	0.839822	-5.55732	2.7395e-08	1.86606e-06
Os08g0485800	56.1596	-3.52707	0.635873	-5.54681	2.90924e-08	1.97643e-06
Os01g0946700	16.4454	-6.06074	1.09391	-5.54046	3.01671e-08	2.04404e-06
Os10g0511200	27.2943	-5.39545	0.975839	-5.52903	3.22e-08	2.17033e-06
Os03g0786400	3380.27	1.23459	0.223285	5.52922	3.2165e-08	2.17033e-06
Os09g0452800	142.08	1.39976	0.253369	5.5246	3.30229e-08	2.21997e-06
Os06g0655100	1129.15	-1.47868	0.267742	-5.52279	3.33651e-08	2.23711e-06
Os04g0466600	563.332	1.06153	0.192226	5.52228	3.34628e-08	2.23782e-06
Os02g0603600	620.792	-1.70941	0.309688	-5.51978	3.39422e-08	2.26399e-06
Os03g0197100	415.395	2.06267	0.374358	5.50989	3.59055e-08	2.37643e-06
Os05g0486100	451.08	-2.87413	0.521624	-5.50996	3.58907e-08	2.37643e-06
Os07g0528200	16.8017	-7.69923	1.39792	-5.50762	3.63709e-08	2.40104e-06
Os02g0599400	57.7607	1.95734	0.355508	5.50576	3.67583e-08	2.42039e-06
Os02g0714100	269.528	-1.34792	0.245166	-5.49801	3.84102e-08	2.52269e-06
Os03g0223100	382.869	2.01923	0.367543	5.49386	3.93249e-08	2.56962e-06
Os10g0140300	17.0712	7.49717	1.36561	5.48996	4.02014e-08	2.6136e-06
Os04g0657300	457.206	1.74492	0.317835	5.49003	4.01859e-08	2.6136e-06
Os01g0621900	3532.86	1.72542	0.314338	5.48906	4.0409e-08	2.62046e-06
Os01g0227500	582.943	1.55465	0.28347	5.48435	4.14999e-08	2.68443e-06
Os03g0595300	1717.09	1.01734	0.185596	5.48149	4.21766e-08	2.72134e-06
Os09g0538000	3140.6	3.80823	0.696284	5.46937	4.51641e-08	2.9068e-06
Os01g0216000	36.9114	-4.29778	0.78832	-5.45182	4.98565e-08	3.19281e-06
Os05g0489200	1343.28	1.74948	0.321638	5.43928	5.34974e-08	3.40897e-06
Os03g0196600	327.992	1.95806	0.360246	5.43536	5.46862e-08	3.47609e-06
Os01g0892500	24.9528	-4.47453	0.823385	-5.43432	5.50067e-08	3.48592e-06
Os02g0625300	1121.3	1.44357	0.265834	5.43035	5.62438e-08	3.54875e-06
Os05g0494600	25.7894	4.82111	0.888185	5.42804	5.69752e-08	3.57732e-06
Os06g0651200	108.196	3.38515	0.623599	5.42841	5.68569e-08	3.57732e-06
Os11g0127800	2279.99	1.30709	0.240888	5.42614	5.75871e-08	3.60544e-06
Os02g0600400	389.677	-1.57547	0.290368	-5.42577	5.77038e-08	3.60544e-06
Os04g0423600	4191.47	1.29257	0.238319	5.42369	5.83799e-08	3.63883e-06
Os11g0177400	235.421	1.54571	0.285253	5.41873	6.00249e-08	3.7323e-06
Os03g0657400	28.5965	-3.33974	0.616636	-5.41607	6.09243e-08	3.76996e-06
Os05g0535800	634.294	1.12801	0.208395	5.41287	6.20216e-08	3.81946e-06
Os06g0289900	2966.83	2.34419	0.433365	5.40926	6.32863e-08	3.88802e-06
Os05g0140300	88.317	1.79248	0.331521	5.40684	6.41466e-08	3.93147e-06
Os01g0575200	162.626	-2.86572	0.530617	-5.40072	6.63726e-08	4.04857e-06
Os06g0543400	168.563	2.32752	0.431327	5.39619	6.80718e-08	4.14238e-06
Os05g0533500	937.149	1.47667	0.274387	5.38171	7.37799e-08	4.47912e-06
Os05g0215300	219.058	1.30486	0.242855	5.37299	7.74413e-08	4.69031e-06
Os08g0535200	262.046	-2.47518	0.460756	-5.37201	7.78648e-08	4.70487e-06
Os02g0629200	1201.92	1.73295	0.323072	5.36398	8.1408e-08	4.90278e-06
Os02g0807800	64.1836	-5.43098	1.01254	-5.36373	8.1522e-08	4.90278e-06
Os01g0742400	181.713	-3.11684	0.581568	-5.35937	8.35108e-08	4.99897e-06
Os05g0160300	2094.72	1.98126	0.369659	5.35971	8.33569e-08	4.99897e-06
Os11g0595200	4379.85	1.24629	0.232659	5.35675	8.4733e-08	5.06034e-06
Os04g0111200	1022.6	1.16716	0.21807	5.35222	8.68805e-08	5.16456e-06
Os04g0464100	89.8663	-3.33481	0.623043	-5.35245	8.67717e-08	5.16456e-06
Os08g0423500	67.927	-7.17153	1.34032	-5.35062	8.76514e-08	5.19836e-06
Os01g0364800	166.786	-1.97108	0.368673	-5.34643	8.97055e-08	5.30263e-06
Os03g0225700	318.756	-1.7978	0.336277	-5.34619	8.98225e-08	5.30263e-06
Os04g0487200	1039.42	-1.04454	0.195684	-5.33788	9.40377e-08	5.53874e-06
Os04g0590400	348.233	-1.36401	0.255873	-5.33081	9.77739e-08	5.74562e-06
Os03g0609800	627.004	-1.14043	0.214062	-5.32755	9.95457e-08	5.83638e-06
Os03g0729100	3016.27	1.02064	0.191741	5.32301	1.02064e-07	5.97039e-06
Os05g0394900	289.623	1.34502	0.252922	5.31793	1.04955e-07	6.11164e-06
Os05g0540000	697.607	-1.22402	0.230156	-5.31821	1.04794e-07	6.11164e-06
Os06g0142350	2.71447	-20.5325	3.8615	-5.31725	1.0535e-07	6.12076e-06
Os05g0477900	1680.44	2.76663	0.520654	5.31377	1.07383e-07	6.22482e-06
Os03g0604566	274.914	2.69716	0.508148	5.30783	1.10938e-07	6.41641e-06
Os03g0660500	15.6013	-7.53275	1.4197	-5.30587	1.12134e-07	6.44503e-06
Os03g0850400	3165.44	2.25219	0.424478	5.30579	1.12186e-07	6.44503e-06
Os09g0503100	368.167	1.13953	0.214752	5.30627	1.11891e-07	6.44503e-06
Os02g0712600	35.7585	-5.44935	1.02719	-5.30511	1.12606e-07	6.45474e-06
Os05g0409500	206.615	-2.81504	0.531495	-5.29646	1.18071e-07	6.75294e-06
Os08g0374000	205.983	2.61724	0.494409	5.29368	1.19881e-07	6.84122e-06
Os11g0649700	573.787	-2.03122	0.383993	-5.28973	1.22495e-07	6.96883e-06
Os04g0165700	2159.24	1.25316	0.236916	5.28949	1.2266e-07	6.96883e-06
Os05g0525900	461.837	-1.55915	0.295312	-5.27967	1.29417e-07	7.33646e-06
Os06g0234400	63.0415	2.83609	0.537519	5.27625	1.31853e-07	7.45811e-06
Os11g0227200	131.467	-2.73449	0.518845	-5.27034	1.36174e-07	7.68562e-06
Os05g0429400	2420.95	-1.3818	0.262269	-5.26864	1.3744e-07	7.74005e-06
Os09g0572000	22.5263	-5.34171	1.01411	-5.2674	1.38367e-07	7.77519e-06
Os10g0430200	1153.64	1.80311	0.342852	5.25914	1.44731e-07	8.11504e-06
Os03g0788500	69.9339	-1.7617	0.335183	-5.25592	1.47286e-07	8.24029e-06
Os07g0569800	17.9697	-5.43257	1.03392	-5.25434	1.48555e-07	8.29325e-06
Os01g0638600	55.0766	2.9815	0.56825	5.2468	1.54763e-07	8.61798e-06
Os02g0638650	91.6102	2.95281	0.562819	5.24647	1.55043e-07	8.61798e-06
Os05g0384300	45.8687	-6.09273	1.1616	-5.24511	1.56186e-07	8.66277e-06
Os01g0279400	122.364	1.75836	0.335661	5.2385	1.6189e-07	8.95975e-06
Os10g0467900	288.126	-1.08039	0.206311	-5.23669	1.63483e-07	9.02849e-06
Os12g0534100	285.094	1.93847	0.370668	5.22967	1.69817e-07	9.35815e-06
Os05g0566800	335.022	1.04981	0.201047	5.22168	1.77306e-07	9.74995e-06
Os01g0723600	267.126	-1.50213	0.287884	-5.21785	1.81012e-07	9.93247e-06
Os06g0703900	636.971	1.09562	0.210334	5.20892	1.89943e-07	1.04003e-05
Os10g0551800	42.1358	-4.92685	0.946471	-5.2055	1.93479e-07	1.05714e-05
Os01g0303000	32831.1	1.71921	0.330423	5.20305	1.96042e-07	1.0666e-05
Os08g0159500	2110.1	1.05656	0.203058	5.20326	1.95819e-07	1.0666e-05
Os06g0129100	143.315	-2.18213	0.419465	-5.20217	1.96975e-07	1.06941e-05
Os04g0448600	3024.9	1.16784	0.224638	5.19879	2.00585e-07	1.08671e-05
Os03g0684700	574.45	1.78098	0.342741	5.1963	2.03291e-07	1.09905e-05
Os01g0232000	89.9883	2.37531	0.457775	5.18882	2.11629e-07	1.13934e-05
Os02g0774100	263.154	1.72949	0.333295	5.18908	2.11335e-07	1.13934e-05
Os10g0180800	1130.03	-2.50186	0.483084	-5.17893	2.23168e-07	1.19894e-05
Os03g0371350	162.926	2.3821	0.460371	5.17431	2.28757e-07	1.22385e-05
Os06g0593800	418.504	1.86149	0.359885	5.17245	2.31044e-07	1.23351e-05
Os03g0837900	143.524	1.59759	0.308901	5.17185	2.31788e-07	1.23492e-05
Os02g0654700	147.901	-2.81984	0.545404	-5.17018	2.3387e-07	1.24343e-05
Os06g0725200	161.745	-1.90869	0.369844	-5.16081	2.4589e-07	1.30464e-05
Os07g0538400	177.098	-2.25146	0.436559	-5.15729	2.50555e-07	1.32665e-05
Os11g0586300	112.844	1.4939	0.289739	5.15602	2.52248e-07	1.33287e-05
Os03g0277600	11.4463	-7.37277	1.43101	-5.15213	2.57543e-07	1.35805e-05
Os02g0512000	31.8735	-3.73402	0.725267	-5.14847	2.62616e-07	1.38196e-05
Os04g0541700	408.601	2.4966	0.485086	5.14671	2.65098e-07	1.39217e-05
Os10g0181100	18.9564	-5.05149	0.981924	-5.14448	2.68264e-07	1.40021e-05
Os04g0366000	64.773	-5.4456	1.05849	-5.14467	2.67988e-07	1.40021e-05
Os08g0359000	2690.92	1.11725	0.217364	5.14	2.74743e-07	1.43111e-05
Os08g0539700	430.024	-2.86773	0.558922	-5.13082	2.88484e-07	1.49662e-05
Os03g0261100	734.654	1.62899	0.317557	5.12977	2.90103e-07	1.50199e-05
Os07g0491900	836.529	1.77541	0.346262	5.12736	2.9384e-07	1.51827e-05
Os03g0820500	843.792	3.35672	0.654759	5.12665	2.94946e-07	1.52092e-05
Os01g0660200	420.653	-3.05844	0.596889	-5.12397	2.99161e-07	1.53957e-05
Os01g0664500	610.287	1.38146	0.269788	5.12053	3.04681e-07	1.56484e-05
Os01g0763750	342.649	-1.17232	0.229111	-5.11681	3.1075e-07	1.58649e-05
Os06g0114400	56.8135	2.69063	0.525808	5.11714	3.10202e-07	1.58649e-05
Os05g0322900	599.23	-2.05297	0.401747	-5.11011	3.21972e-07	1.64052e-05
Os06g0487620	68.4578	-2.11754	0.414421	-5.10963	3.22796e-07	1.64146e-05
Os06g0557100	722.875	-1.87841	0.368016	-5.10416	3.32266e-07	1.68296e-05
Os12g0617400	15.4921	3.73339	0.731596	5.10308	3.34176e-07	1.68598e-05
Os03g0287100	142.935	1.45209	0.284549	5.10311	3.34111e-07	1.68598e-05
Os03g0314500	563.683	-2.80766	0.5504	-5.10112	3.37656e-07	1.7002e-05
Os04g0468600	399.87	-3.54213	0.694533	-5.10001	3.39632e-07	1.7068e-05
Os07g0570100	460.538	-1.59516	0.312824	-5.09925	3.41009e-07	1.71037e-05
Os04g0173300	1213.85	-1.49307	0.293548	-5.0863	3.65107e-07	1.82412e-05
Os02g0617800	1010.89	1.43867	0.283006	5.08355	3.70451e-07	1.84722e-05
Os12g0611100	319.049	-1.40892	0.277312	-5.08062	3.76208e-07	1.87132e-05
Os07g0538350	88.9998	-3.80342	0.748653	-5.08035	3.76741e-07	1.87132e-05
Os03g0806600	746.083	-1.84774	0.36385	-5.0783	3.8082e-07	1.88429e-05
Os03g0718800	133.737	2.42857	0.478871	5.07145	3.94797e-07	1.94595e-05
Os09g0410700	61.8768	1.90522	0.375665	5.07158	3.94532e-07	1.94595e-05
Os02g0240100	77.8869	-4.23291	0.835797	-5.06453	4.09415e-07	2.01324e-05
Os05g0395116	41.4328	2.65272	0.523814	5.06425	4.10016e-07	2.01324e-05
Os08g0331900	35.3114	-4.19358	0.828395	-5.06229	4.14244e-07	2.03011e-05
Os01g0221100	655.426	-1.47971	0.292358	-5.06128	4.16454e-07	2.03705e-05
Os01g0524500	2358.9	1.18641	0.234499	5.05935	4.20695e-07	2.05389e-05
Os11g0475000	13.3147	-7.20342	1.42448	-5.05686	4.2621e-07	2.07687e-05
Os09g0537700	6263.16	3.07617	0.608359	5.0565	4.27019e-07	2.07687e-05
Os11g0670900	103.403	2.49957	0.494846	5.05121	4.39017e-07	2.12716e-05
Os09g0355400	1314.77	-1.66169	0.329235	-5.04711	4.48553e-07	2.16927e-05
Os12g0512800	18.3204	-5.24589	1.03974	-5.04541	4.52559e-07	2.18453e-05
Os10g0127900	259.502	-2.12984	0.422339	-5.04297	4.58353e-07	2.20835e-05
Os04g0513400	217.93	2.79497	0.554465	5.04085	4.6348e-07	2.22887e-05
Os03g0801900	205.338	-1.68829	0.335023	-5.03932	4.67196e-07	2.24254e-05
Os10g0348900	165.992	-2.32787	0.46202	-5.03845	4.69307e-07	2.24847e-05
Os01g0944100	654.831	3.40529	0.676123	5.03649	4.74141e-07	2.26599e-05
Os01g0134700	131.577	-3.15636	0.62813	-5.02501	5.03398e-07	2.39838e-05
Os06g0160700	500.498	1.65822	0.330047	5.02417	5.05604e-07	2.40443e-05
Os11g0498600	100.644	2.12278	0.422654	5.02251	5.10007e-07	2.4187e-05
Os06g0147000	150.361	2.71246	0.540079	5.02233	5.10489e-07	2.4187e-05
Os09g0431100	47.0734	-3.88264	0.773209	-5.02147	5.12777e-07	2.42507e-05
Os11g0559600	124.542	-3.1393	0.625499	-5.01887	5.19768e-07	2.45361e-05
Os07g0645300	45.0818	2.79292	0.556721	5.01673	5.25587e-07	2.47653e-05
Os12g0578400	461.775	-1.39175	0.277933	-5.00748	5.51477e-07	2.59376e-05
Os11g0171300	97349.2	1.08189	0.216138	5.00557	5.56971e-07	2.61481e-05
Os11g0175700	109.269	-1.7646	0.352963	-4.9994	5.751e-07	2.69009e-05
Os01g0194300	267.419	-1.77289	0.354905	-4.99538	5.87191e-07	2.74165e-05
Os10g0506100	166.961	1.91597	0.383637	4.99423	5.90721e-07	2.74814e-05
Os07g0142900	10159.2	1.97757	0.395949	4.99452	5.89824e-07	2.74814e-05
Os02g0638300	3480.73	1.57317	0.315031	4.99371	5.92314e-07	2.7491e-05
Os07g0546000	466.536	1.28669	0.257676	4.99346	5.93069e-07	2.7491e-05
Os09g0472700	74.8481	-3.72694	0.746424	-4.99307	5.94284e-07	2.74977e-05
Os01g0688600	252.764	-1.03694	0.207852	-4.98883	6.07472e-07	2.80573e-05
Os11g0676500	42.9665	-2.71899	0.545143	-4.98767	6.11131e-07	2.81757e-05
Os01g0962100	289.907	2.31314	0.463852	4.9868	6.13863e-07	2.82509e-05
Os05g0541000	25.7426	3.39732	0.682299	4.97922	6.38397e-07	2.93274e-05
Os03g0708500	2666.75	2.13132	0.428147	4.97801	6.42397e-07	2.94248e-05
Os08g0207500	78.2521	2.68216	0.538815	4.97789	6.42808e-07	2.94248e-05
Os05g0171900	910.875	-2.82881	0.568421	-4.97662	6.47058e-07	2.95666e-05
Os08g0451200	387.892	1.10309	0.221694	4.97573	6.50016e-07	2.96491e-05
Os09g0268800	8.69758	-7.00659	1.40831	-4.97516	6.51925e-07	2.96834e-05
Os11g0229500	27.6527	-5.07521	1.02155	-4.96815	6.75955e-07	3.06688e-05
Os03g0317300	21.5931	-3.62873	0.730581	-4.96691	6.80284e-07	3.07149e-05
Os07g0616500	655.463	1.02263	0.205885	4.96699	6.7999e-07	3.07149e-05
Os09g0346600	224.904	-1.30814	0.263374	-4.96683	6.80559e-07	3.07149e-05
Os03g0679800	104.518	2.32294	0.467853	4.9651	6.8664e-07	3.09349e-05
Os09g0460400	27.9057	2.6578	0.535767	4.96073	7.02305e-07	3.15853e-05
Os12g0291100	37998.8	1.1041	0.222639	4.95915	7.08009e-07	3.16754e-05
Os07g0543300	163.769	3.67647	0.741323	4.95934	7.07348e-07	3.16754e-05
Os07g0674100	465.616	1.68067	0.338977	4.95806	7.11991e-07	3.17981e-05
Os01g0841700	90.6237	-2.89533	0.584318	-4.95506	7.23096e-07	3.2238e-05
Os06g0503400	6398.71	1.68135	0.339635	4.95045	7.4042e-07	3.29532e-05
Os03g0582000	889.831	1.28775	0.260767	4.93832	7.87985e-07	3.4949e-05
Os03g0744600	3230.05	1.01608	0.20575	4.93841	7.87612e-07	3.4949e-05
Os04g0647800	1087.29	-1.25147	0.25347	-4.93734	7.91939e-07	3.50638e-05
Os03g0249200	756.306	1.13773	0.230451	4.93698	7.9343e-07	3.50693e-05
Os10g0490400	31.9511	4.18638	0.848323	4.93489	8.01955e-07	3.53245e-05
Os05g0550700	38.0341	-3.60899	0.731284	-4.93514	8.00939e-07	3.53245e-05
Os01g0745000	16.1866	-6.94435	1.40819	-4.93139	8.16464e-07	3.5902e-05
Os03g0848700	902.379	-1.65613	0.335974	-4.92935	8.25021e-07	3.62163e-05
Os11g0228201	9.72485	-7.15639	1.45193	-4.92889	8.26987e-07	3.62407e-05
Os01g0687400	328.572	-2.36631	0.480218	-4.92758	8.32557e-07	3.64226e-05
Os05g0127300	318.677	-1.45356	0.295064	-4.92627	8.38161e-07	3.66054e-05
Os10g0483500	142.659	1.57463	0.320155	4.91832	8.72907e-07	3.79936e-05
Os05g0462000	214.985	-2.07499	0.422031	-4.91667	8.80284e-07	3.8157e-05
Os05g0468900	176.283	-2.06472	0.419983	-4.91619	8.82435e-07	3.8157e-05
Os05g0507300	1238.07	-1.45121	0.295182	-4.91632	8.81879e-07	3.8157e-05
Os05g0579600	617.682	1.27988	0.260343	4.91613	8.82707e-07	3.8157e-05
Os08g0509100	505.585	-2.68124	0.545431	-4.91583	8.8409e-07	3.8157e-05
Os01g0314800	3983.98	2.68212	0.546106	4.91135	9.04497e-07	3.8854e-05
Os03g0757100	197.453	2.07626	0.422753	4.91129	9.04778e-07	3.8854e-05
Os07g0663800	1905.14	-1.78518	0.363612	-4.90958	9.12711e-07	3.91292e-05
Os07g0413800	2254.98	2.27117	0.462694	4.90858	9.17362e-07	3.92631e-05
Os06g0128800	50.3524	-4.87842	0.996372	-4.89619	9.77127e-07	4.16821e-05
Os05g0519200	1191.95	-1.34108	0.273966	-4.89504	9.82856e-07	4.18569e-05
Os07g0572100	423.38	1.91806	0.392978	4.88082	1.05645e-06	4.48424e-05
Os05g0550800	50.1501	-1.68665	0.345652	-4.87963	1.06285e-06	4.50394e-05
Os01g0718300	1548.12	-1.14827	0.235337	-4.87925	1.06488e-06	4.50514e-05
Os07g0683200	611.228	-2.25119	0.461425	-4.87879	1.06741e-06	4.50838e-05
Os10g0559200	80.1713	2.08723	0.428185	4.87459	1.09034e-06	4.59016e-05
Os11g0247000	330.664	-1.97365	0.405059	-4.87249	1.102e-06	4.63165e-05
Os02g0314300	673.136	3.01134	0.618216	4.87102	1.11024e-06	4.65863e-05
Os10g0475100	950.942	2.61462	0.536919	4.86968	1.11781e-06	4.67631e-05
Os04g0524500	255.926	-2.51528	0.516666	-4.86829	1.12568e-06	4.70041e-05
Os05g0568800	2071.32	1.83621	0.377342	4.86617	1.13781e-06	4.74332e-05
Os06g0649900	133.258	-1.51586	0.311591	-4.86489	1.14521e-06	4.76643e-05
Os09g0554300	1236.53	-1.06911	0.220103	-4.85733	1.18977e-06	4.93589e-05
Os01g0826000	71.9622	2.57474	0.530248	4.85572	1.1995e-06	4.96827e-05
Os10g0350800	236.84	1.35507	0.279431	4.84938	1.23848e-06	5.11321e-05
Os08g0434100	239.483	2.06627	0.426352	4.8464	1.25724e-06	5.18231e-05
Os03g0764100	570.844	-1.61141	0.333078	-4.83795	1.31186e-06	5.38156e-05
Os09g0460300	123.621	2.42337	0.501027	4.83681	1.31943e-06	5.40396e-05
Os04g0652700	852.837	-1.33245	0.275576	-4.83517	1.33033e-06	5.43995e-05
Os04g0154800	76.6001	-3.1079	0.642964	-4.8337	1.34019e-06	5.47154e-05
Os08g0566600	3465.24	1.41514	0.292973	4.83026	1.36355e-06	5.55807e-05
Os06g0224200	148.805	-1.91183	0.395908	-4.82898	1.37231e-06	5.58271e-05
Os08g0161500	140.095	1.57378	0.325918	4.82875	1.37394e-06	5.58271e-05
Os12g0115300	4184.53	1.76007	0.365056	4.82137	1.42573e-06	5.77489e-05
Os10g0379854	94.8001	-2.14804	0.445687	-4.81961	1.43838e-06	5.80778e-05
Os04g0524600	117.268	-2.64976	0.550289	-4.81522	1.47041e-06	5.92781e-05
Os03g0187500	54.0838	2.14488	0.445544	4.81407	1.47889e-06	5.95264e-05
Os01g0818600	471.096	1.20877	0.251182	4.81232	1.4919e-06	5.99562e-05
Os03g0628800	1126.54	1.2237	0.254323	4.8116	1.4973e-06	6.00792e-05
Os01g0656200	34.3007	3.10798	0.646065	4.81063	1.50457e-06	6.00973e-05
Os12g0639600	328.593	-2.19654	0.456559	-4.81107	1.50127e-06	6.00973e-05
Os06g0335900	27.5612	-3.30159	0.686316	-4.8106	1.50477e-06	6.00973e-05
Os01g0557100	326.893	1.37045	0.28506	4.8076	1.52755e-06	6.09123e-05
Os01g0869800	41552.9	1.19125	0.248059	4.80227	1.5688e-06	6.22672e-05
Os09g0305300	112.251	1.91032	0.397927	4.80069	1.58119e-06	6.26619e-05
Os08g0480000	334.945	1.69661	0.353532	4.79903	1.59435e-06	6.30862e-05
Os04g0525200	114.771	-2.85503	0.595845	-4.79158	1.65476e-06	6.53759e-05
Os05g0135400	11.4534	-6.99073	1.45948	-4.78989	1.66873e-06	6.58265e-05
Os03g0132000	570.068	-1.18569	0.247615	-4.78845	1.68073e-06	6.61981e-05
Os08g0501700	52.1019	-2.63454	0.550661	-4.78432	1.71567e-06	6.74706e-05
Os12g0628600	1232.17	-3.21572	0.672222	-4.78371	1.72089e-06	6.75725e-05
Os02g0632800	20.179	-4.73476	0.990327	-4.78101	1.74416e-06	6.83817e-05
Os08g0462900	73.8679	1.80464	0.378802	4.76408	1.89715e-06	7.42664e-05
Os02g0763900	447.68	-1.3108	0.275191	-4.76322	1.90525e-06	7.44701e-05
Os05g0460000	441.884	1.85148	0.388955	4.76015	1.93445e-06	7.54965e-05
Os08g0425500	62.0549	1.52616	0.3213	4.74995	2.03462e-06	7.92854e-05
Os08g0375400	334.755	2.50335	0.527436	4.74627	2.07207e-06	8.06224e-05
Os02g0782300	373.331	-1.07307	0.226385	-4.74001	2.13707e-06	8.27083e-05
Os03g0341300	643.53	1.98984	0.419809	4.73987	2.13856e-06	8.27083e-05
Os04g0517100	211.735	-2.30513	0.486383	-4.73934	2.14419e-06	8.28011e-05
Os02g0761400	1927.78	1.09957	0.232115	4.73716	2.16739e-06	8.35713e-05
Os02g0134400	197.305	-1.68491	0.35571	-4.73673	2.1719e-06	8.36196e-05
Os05g0267900	211.392	-1.06266	0.224376	-4.73608	2.17895e-06	8.37657e-05
Os05g0195700	325.01	1.09994	0.232447	4.73201	2.22312e-06	8.52085e-05
Os06g0317200	440.327	-1.28352	0.271691	-4.72418	2.3104e-06	8.8422e-05
Os05g0287800	561.556	-1.54708	0.327631	-4.72203	2.33503e-06	8.92315e-05
Os01g0355800	79.3553	3.29664	0.698842	4.71729	2.39003e-06	9.10622e-05
Os03g0122300	286.069	-1.94102	0.412422	-4.7064	2.52129e-06	9.5921e-05
Os08g0351300	207.269	-3.77822	0.802921	-4.7056	2.53125e-06	9.61575e-05
Os02g0570400	206.477	-3.94604	0.839445	-4.70078	2.59173e-06	9.80363e-05
Os04g0634700	105.42	-1.9583	0.416593	-4.70074	2.59216e-06	9.80363e-05
Os10g0173000	137.513	2.35351	0.500947	4.69812	2.62565e-06	9.9157e-05
Os09g0294300	30.5481	1.82027	0.387704	4.695	2.66608e-06	0.000100389
Os12g0471100	34.8552	-5.20828	1.10982	-4.69292	2.69334e-06	0.000101267
Os12g0218800	6.76849	-6.47807	1.38104	-4.69074	2.72223e-06	0.000102203
Os04g0111100	32.0262	-3.25017	0.69303	-4.6898	2.73477e-06	0.000102524
Os12g0190400	5.49507	-6.63583	1.41505	-4.68946	2.73921e-06	0.000102541
Os04g0122000	254.541	-1.86282	0.397333	-4.6883	2.75479e-06	0.000102974
Os11g0549469	9.33026	-6.43851	1.37376	-4.68676	2.7756e-06	0.000103601
Os01g0825800	335.173	-1.73934	0.371275	-4.68477	2.80274e-06	0.000104462
Os01g0846400	51.1919	4.18151	0.89319	4.68155	2.84718e-06	0.000105964
Os09g0547500	289.664	-1.9333	0.413158	-4.67932	2.87829e-06	0.000106967
Os02g0793700	4072.89	1.07772	0.230434	4.67693	2.91208e-06	0.000108067
Os04g0439300	126.407	1.45888	0.311964	4.67644	2.91894e-06	0.000108165
Os04g0282400	1747.47	2.24245	0.479628	4.67539	2.93392e-06	0.000108563
Os11g0546300	267.021	1.16486	0.249227	4.67389	2.95548e-06	0.000109204
Os05g0499800	239.729	1.40999	0.302004	4.66879	3.02986e-06	0.000111791
Os11g0543500	715.25	1.23259	0.264186	4.66561	3.077e-06	0.000113205
Os05g0363200	2439.45	-1.08493	0.23253	-4.66575	3.07498e-06	0.000113205
Os01g0925100	54.8253	-1.78965	0.383912	-4.66162	3.13733e-06	0.00011526
Os03g0400800	39.4937	-2.97514	0.638262	-4.66131	3.14196e-06	0.000115265
Os10g0530750	410.108	1.52606	0.327647	4.65763	3.1987e-06	0.000117179
Os02g0129800	480.978	1.89885	0.407717	4.65728	3.20416e-06	0.000117212
Os01g0741900	638.528	-1.85851	0.399111	-4.65662	3.21444e-06	0.000117421
Os01g0217500	93.0542	-2.44947	0.526372	-4.65349	3.26363e-06	0.000119048
Os02g0132500	2049.24	-1.21669	0.261678	-4.64958	3.32605e-06	0.000121153
Os05g0510400	314.997	-1.35078	0.290676	-4.64705	3.36716e-06	0.000122477
Os05g0258400	37.9344	-2.32118	0.499614	-4.64594	3.38536e-06	0.000122965
Os03g0261800	531.872	1.22041	0.262785	4.64414	3.41501e-06	0.000123867
Os01g0179600	7334.88	1.88515	0.406507	4.63743	3.52763e-06	0.000127412
Os06g0232100	1267.38	-1.53485	0.331088	-4.63577	3.55607e-06	0.000128079
Os09g0447300	65.9448	-2.73171	0.58939	-4.63481	3.57267e-06	0.000128496
Os07g0678300	1020.88	1.59436	0.344336	4.63025	3.65217e-06	0.000130988
Os02g0437300	1022.61	-1.50073	0.324296	-4.62765	3.69834e-06	0.000132459
Os05g0349800	35.4447	4.49952	0.972671	4.62595	3.72894e-06	0.000133369
Os05g0380200	151.725	-2.85978	0.618586	-4.62308	3.78076e-06	0.000134847
Os02g0642200	61.413	1.6029	0.347292	4.61542	3.92308e-06	0.000139536
Os07g0687200	1333.2	-1.10208	0.238952	-4.61215	3.98519e-06	0.000141549
Os01g0389700	224.289	-2.23302	0.48437	-4.61016	4.02365e-06	0.000142717
Os12g0527700	112.189	-1.44737	0.314128	-4.60759	4.0736e-06	0.000144201
Os09g0519200	1295.25	2.13476	0.463329	4.60743	4.0767e-06	0.000144201
Os03g0772600	614.437	-1.88308	0.408764	-4.60676	4.08992e-06	0.000144469
Os08g0203150	73.7937	-4.79582	1.0413	-4.60562	4.11243e-06	0.000145065
Os02g0595100	1212.47	1.10903	0.240833	4.60496	4.12544e-06	0.000145324
Os04g0491200	67.5891	-2.02371	0.439504	-4.60453	4.13398e-06	0.000145426
Os10g0140700	301.064	1.83951	0.399564	4.60378	4.1489e-06	0.000145751
Os04g0630400	338.166	1.72397	0.374548	4.60281	4.16831e-06	0.000146233
Os02g0194600	13.9277	3.11174	0.676134	4.60224	4.17964e-06	0.00014643
Os05g0136900	1017.4	-1.01438	0.220498	-4.6004	4.21688e-06	0.000147533
Os04g0128700	27.1089	-3.65399	0.795265	-4.59468	4.33416e-06	0.000151309
Os08g0194350	37.5626	2.39023	0.520724	4.5902	4.42824e-06	0.000154297
Os05g0473500	1104	-1.92311	0.419478	-4.58454	4.54991e-06	0.000158322
Os06g0125500	1401.44	-1.43076	0.312227	-4.58242	4.59634e-06	0.000159721
Os03g0109000	10.8368	6.56563	1.43319	4.58114	4.62455e-06	0.000160484
Os07g0690900	79.6182	-2.22436	0.485912	-4.5777	4.70127e-06	0.000162927
Os02g0673100	12.6037	-6.97633	1.52568	-4.5726	4.81709e-06	0.000166491
Os06g0652300	24.4618	3.28696	0.719054	4.57123	4.84871e-06	0.000167134
Os03g0691800	150.076	-1.61127	0.352688	-4.56854	4.91134e-06	0.000169066
Os11g0125900	103.392	1.7183	0.376329	4.56596	4.97221e-06	0.000170704
Os08g0249000	436.406	1.39128	0.305005	4.56151	5.07863e-06	0.000174125
Os02g0565150	35.873	3.93773	0.86379	4.55867	5.14797e-06	0.000176266
Os10g0163220	69.1285	-1.7065	0.374808	-4.553	5.28872e-06	0.000180364
Os01g0292200	1477.02	1.50133	0.329941	4.5503	5.35682e-06	0.000182255
Os03g0135700	101.657	-1.91427	0.420696	-4.55025	5.35834e-06	0.000182255
Os01g0750500	166.84	-1.61143	0.354269	-4.54861	5.40024e-06	0.000183437
Os08g0423600	25.5081	-7.57756	1.66622	-4.54775	5.42212e-06	0.000183937
Os10g0474100	749.053	1.47042	0.323563	4.54448	5.507e-06	0.00018657
Os09g0561500	14.3422	-2.92244	0.643671	-4.54027	5.61819e-06	0.000190086
Os01g0822800	277.438	2.21572	0.488152	4.53899	5.65239e-06	0.000190991
Os07g0417200	8.87622	-6.83921	1.50926	-4.5315	5.85657e-06	0.000197219
Os07g0162100	389.956	1.66662	0.368119	4.52739	5.97172e-06	0.000200463
Os07g0542400	2445.88	-3.52333	0.778368	-4.52656	5.99526e-06	0.00020099
Os07g0568700	500.093	-2.78185	0.614651	-4.5259	6.01391e-06	0.000201352
Os01g0928800	565.843	-1.04209	0.230642	-4.51821	6.23642e-06	0.00020853
Os04g0598800	84.3289	-2.04172	0.452047	-4.51662	6.28337e-06	0.000209827
Os11g0569800	275.922	-1.65564	0.366593	-4.51628	6.29364e-06	0.000209897
Os03g0189400	1067.28	-1.60906	0.356315	-4.51582	6.30712e-06	0.000210074
Os04g0538400	21.9333	-5.64489	1.25034	-4.51468	6.34119e-06	0.000210662
Os06g0335950	34.6107	-3.65519	0.809575	-4.51494	6.33336e-06	0.000210662
Os05g0500500	117.83	1.37166	0.304025	4.51167	6.43201e-06	0.000213403
Os01g0944700	1347	-1.68551	0.373788	-4.50926	6.50541e-06	0.000215005
Os11g0207200	2735.67	-1.14517	0.25395	-4.50942	6.50038e-06	0.000215005
Os01g0899200	213.495	1.81322	0.402158	4.50872	6.52214e-06	0.000215152
Os03g0270600	44.224	-3.27526	0.726453	-4.50857	6.52662e-06	0.000215152
Os05g0500200	93.4974	2.07853	0.461092	4.50785	6.54885e-06	0.000215608
Os08g0192300	29.8575	3.17609	0.704655	4.50729	6.56595e-06	0.000215895
Os05g0576500	127.311	-1.87084	0.415176	-4.50614	6.60181e-06	0.000216796
Os12g0292400	17057.3	1.51292	0.335995	4.50281	6.70612e-06	0.00021994
Os11g0609500	9.52846	-6.73541	1.49628	-4.50144	6.74937e-06	0.000221076
Os12g0210500	107.83	-3.42466	0.760847	-4.50111	6.75983e-06	0.000221137
Os04g0585700	256.184	1.12539	0.250097	4.49981	6.80138e-06	0.000221931
Os03g0393700	181.506	-1.53962	0.342379	-4.49683	6.89743e-06	0.000224779
Os02g0167600	377.451	1.9139	0.426	4.49271	7.03232e-06	0.000228885
Os10g0466800	113.646	1.77417	0.39495	4.49213	7.05141e-06	0.000229215
Os01g0972200	27.4908	-2.15157	0.479371	-4.48832	7.1787e-06	0.000233058
Os10g0489650	807.028	1.69202	0.377167	4.48613	7.25299e-06	0.000235173
Os02g0174900	15.669	2.93838	0.655184	4.48481	7.29789e-06	0.000236045
Os07g0602900	299.397	1.36331	0.303985	4.4848	7.29827e-06	0.000236045
Os07g0127500	6.55925	-6.52753	1.45621	-4.48254	7.37613e-06	0.000237964
Os07g0507500	31.5891	2.39627	0.534732	4.48126	7.4205e-06	0.000239095
Os02g0774300	102.945	1.14833	0.256271	4.48091	7.43253e-06	0.000239182
Os02g0569900	83.8643	-4.34226	0.969479	-4.47896	7.50078e-06	0.000241076
Os10g0509600	14.0639	6.53938	1.46023	4.47833	7.52289e-06	0.000241485
Os02g0514326	26.2252	-2.96307	0.661987	-4.47603	7.60443e-06	0.000243797
Os01g0692200	98.7577	1.99011	0.445136	4.47078	7.79338e-06	0.000249544
Os10g0492900	1236.3	1.7449	0.39053	4.46804	7.89395e-06	0.000252135
Os05g0495600	493.49	-2.0888	0.467698	-4.46612	7.96519e-06	0.000254094
Os07g0414000	486	1.72083	0.385519	4.46367	8.05659e-06	0.000256691
Os02g0816400	900.728	-1.36984	0.307224	-4.45877	8.24305e-06	0.000261982
Os01g0717400	588.349	1.65552	0.371835	4.4523	8.49545e-06	0.00026967
Os02g0806900	241.963	-1.2527	0.281494	-4.45019	8.5796e-06	0.000272005
Os03g0148700	289.759	-1.1545	0.259518	-4.44863	8.64192e-06	0.000273306
Os02g0504000	1755.15	1.47028	0.330635	4.44685	8.71374e-06	0.0002749
Os04g0456700	1772.96	1.33276	0.299869	4.44449	8.81006e-06	0.000277068
Os05g0261700	116.027	-1.24843	0.280954	-4.44356	8.8482e-06	0.000277777
Os04g0338100	1647.51	1.06837	0.24045	4.44319	8.86337e-06	0.000277914
Os06g0172800	239.295	-1.53853	0.346329	-4.44238	8.89703e-06	0.000278301
Os08g0203600	1824.59	-1.55892	0.35092	-4.44237	8.89741e-06	0.000278301
Os07g0597200	342.328	-1.99848	0.450134	-4.43975	9.00618e-06	0.000281361
Os04g0654600	465.848	-1.75606	0.395565	-4.43937	9.02245e-06	0.000281527
Os07g0448100	17.4769	4.38776	0.988681	4.43799	9.08021e-06	0.0002823
Os05g0140334	69.2526	1.89961	0.428316	4.43507	9.2041e-06	0.000285142
Os01g0190000	2280.78	1.14509	0.258485	4.43001	9.42298e-06	0.000290428
Os12g0131400	17.4335	-5.22284	1.17895	-4.43008	9.41998e-06	0.000290428
Os02g0557800	2751.95	1.27273	0.287343	4.42928	9.45473e-06	0.000290428
Os04g0630800	277.023	-1.82908	0.412935	-4.42947	9.44633e-06	0.000290428
Os04g0525100	213.21	-1.98672	0.448625	-4.42846	9.49095e-06	0.000291192
Os02g0681632	156.788	-2.02096	0.456405	-4.42801	9.51075e-06	0.000291278
Os08g0137300	106.112	1.09359	0.246979	4.42788	9.51646e-06	0.000291278
Os08g0398300	55.1562	-3.43752	0.776826	-4.42508	9.64048e-06	0.000294723
Os12g0571400	14.1533	3.7828	0.855176	4.42342	9.7151e-06	0.000296523
Os03g0834050	142.312	-2.22606	0.503262	-4.42326	9.72243e-06	0.000296523
Os04g0459500	77639.4	1.30804	0.295742	4.4229	9.73854e-06	0.000296662
Os03g0437200	48.9051	-4.2123	0.952684	-4.4215	9.80163e-06	0.00029823
Os01g0823600	782.287	1.66576	0.376838	4.42037	9.8533e-06	0.00029874
Os08g0356500	240.833	-1.45707	0.329747	-4.41875	9.92732e-06	0.000300629
Os02g0156600	24.2653	-2.16973	0.491608	-4.41354	1.01695e-05	0.000306879
Os04g0228400	71.7498	2.15282	0.488076	4.41083	1.02973e-05	0.000310369
Os01g0826400	318.287	-2.9321	0.665414	-4.40643	1.0509e-05	0.000316009
Os01g0933900	193.303	-1.43911	0.326662	-4.4055	1.05541e-05	0.000316789
Os08g0448000	96.6503	-2.8126	0.638446	-4.40538	1.05596e-05	0.000316789
Os11g0133700	60.1546	-2.84297	0.645426	-4.40479	1.05888e-05	0.000317293
Os01g0756300	36.7934	-3.4421	0.781566	-4.40411	1.06221e-05	0.00031792
Os10g0514901	17.3489	-3.77626	0.857551	-4.40354	1.06501e-05	0.000318387
Os03g0363100	16.3218	-5.06267	1.15019	-4.4016	1.07454e-05	0.00032072
Os07g0650600	2748.23	-1.17432	0.266804	-4.40145	1.07531e-05	0.00032072
Os09g0571200	264.485	-2.75269	0.625688	-4.39946	1.08521e-05	0.000323062
Os05g0100600	542.202	-1.93899	0.440944	-4.39737	1.09571e-05	0.000325669
Os08g0174300	93.6307	2.82237	0.64192	4.39677	1.09876e-05	0.000326198
Os10g0524700	77.4102	-1.92788	0.438524	-4.39628	1.10121e-05	0.000326547
Os06g0223700	214.904	1.5585	0.354851	4.39197	1.12329e-05	0.000332329
Os08g0484200	152.982	-1.98241	0.451404	-4.39165	1.12492e-05	0.000332428
Os12g0123200	171.268	-1.38487	0.315461	-4.38999	1.13356e-05	0.000333936
Os05g0111300	2835.44	1.85702	0.422993	4.39018	1.13258e-05	0.000333936
Os10g0491400	67.4151	-4.82444	1.0994	-4.38826	1.1426e-05	0.000335994
Os04g0524300	2.20642	-20.9669	4.77815	-4.38809	1.14353e-05	0.000335994
Os02g0612900	1575.16	1.696	0.386545	4.38759	1.14616e-05	0.000336381
Os07g0677100	113.715	-3.6549	0.834309	-4.38075	1.1827e-05	0.000346313
Os12g0565166	39.6259	-2.89567	0.662001	-4.37413	1.2192e-05	0.000356596
Os07g0659300	110.595	2.55516	0.584378	4.37245	1.22861e-05	0.00035853
Os07g0251900	8.75941	-7.17076	1.64031	-4.37159	1.23346e-05	0.000359538
Os10g0553800	1231.42	1.03136	0.23598	4.37056	1.23928e-05	0.00036082
Os11g0116000	9206.88	1.75969	0.402733	4.36936	1.24608e-05	0.000361576
Os08g0236800	122.498	1.46737	0.336433	4.36155	1.29142e-05	0.000374308
Os10g0406900	357.255	2.35636	0.540946	4.356	1.32462e-05	0.000383067
Os02g0695900	21.7426	-2.92098	0.670539	-4.35617	1.32358e-05	0.000383067
Os11g0549620	615.423	-1.28881	0.295901	-4.35555	1.32731e-05	0.000383413
Os03g0727600	27.4051	-2.786	0.640223	-4.3516	1.35146e-05	0.000389948
Os01g0227350	283.81	1.62543	0.373822	4.34815	1.37293e-05	0.000395698
Os01g0208700	2842.1	1.02406	0.235625	4.34615	1.38546e-05	0.000398864
Os11g0482200	21.3636	-4.49156	1.03386	-4.34446	1.3962e-05	0.000401055
Os02g0285900	122.937	2.1855	0.503157	4.34357	1.40184e-05	0.000401778
Os08g0385000	150.468	2.60847	0.600503	4.3438	1.40038e-05	0.000401778
Os11g0626700	1089.06	-1.71961	0.396134	-4.34098	1.41849e-05	0.000406096
Os09g0493800	246.904	-1.18338	0.272638	-4.34049	1.42166e-05	0.00040655
Os06g0239500	132.632	1.36814	0.31525	4.33988	1.42564e-05	0.000406781
Os08g0495500	495.452	-1.04131	0.239931	-4.34002	1.4247e-05	0.000406781
Os05g0303000	2459.36	1.22602	0.282619	4.33807	1.43739e-05	0.000409679
Os05g0379500	104.925	-1.83685	0.42398	-4.33241	1.47488e-05	0.000418971
Os10g0568200	129.393	-2.01702	0.465646	-4.33166	1.47987e-05	0.00041946
Os05g0324700	56.0462	-4.06855	0.940043	-4.32805	1.50435e-05	0.000425459
Os08g0482600	308.497	-3.90506	0.902661	-4.32616	1.51733e-05	0.000428659
Os08g0320400	415.925	-1.0279	0.237632	-4.32561	1.52113e-05	0.000429258
Os01g0627400	39.4799	2.03382	0.470423	4.32338	1.53658e-05	0.000432668
Os04g0111500	564.131	-1.16771	0.270088	-4.32343	1.53623e-05	0.000432668
Os03g0560050	20.9713	-2.78243	0.643619	-4.32311	1.53845e-05	0.000432721
Os01g0276900	169.267	1.22959	0.284775	4.31777	1.57613e-05	0.000442351
Os01g0947800	17.8769	-2.57834	0.597235	-4.31713	1.58071e-05	0.00044315
Os07g0614000	624.837	2.0497	0.474977	4.31537	1.59338e-05	0.000446216
Os02g0242900	30.8113	-3.33407	0.772659	-4.31506	1.59558e-05	0.000446344
Os10g0162100	174.586	1.80634	0.418693	4.31423	1.60162e-05	0.00044731
Os02g0632900	50.8845	-2.27053	0.526305	-4.3141	1.60251e-05	0.00044731
Os11g0167800	36999.1	1.46637	0.340019	4.3126	1.61342e-05	0.000449866
Os05g0155200	110.767	1.41365	0.327992	4.31001	1.63249e-05	0.000454689
Os01g0938100	3366.13	1.26598	0.293753	4.30969	1.63484e-05	0.000454849
Os01g0252600	348.998	1.46001	0.338915	4.30788	1.64825e-05	0.000458084
Os05g0519300	412.837	1.83856	0.426839	4.30739	1.65195e-05	0.000458616
Os03g0285800	315.678	-2.00101	0.464852	-4.30462	1.67276e-05	0.000463892
Os11g0684000	225.994	-2.10205	0.488571	-4.30244	1.68929e-05	0.000467972
Os06g0606700	2339.67	1.91145	0.445239	4.29309	1.76202e-05	0.000486546
Os02g0114900	57.6898	1.71503	0.399527	4.29266	1.76548e-05	0.000486975
Os11g0214900	54.608	1.58048	0.368521	4.28872	1.7971e-05	0.000495166
Os01g0123900	2154.57	2.06054	0.48056	4.2878	1.80454e-05	0.000496151
Os03g0733200	52.015	2.27094	0.529807	4.28635	1.81635e-05	0.000498864
Os09g0544000	34.7002	-4.86417	1.13509	-4.28526	1.82527e-05	0.00050078
Os11g0621400	1737.83	1.43244	0.334716	4.27956	1.87265e-05	0.00051323
Os03g0300600	1334.15	1.40883	0.329439	4.27644	1.89902e-05	0.000519904
Os10g0530500	3203.18	1.24068	0.290245	4.27461	1.91476e-05	0.000523096
Os01g0214200	411.959	-1.11994	0.262668	-4.2637	2.01071e-05	0.000546982
Os06g0699200	394.063	-1.03098	0.241839	-4.26308	2.0163e-05	0.000547923
Os08g0556300	24.4966	-3.53753	0.830122	-4.26146	2.03096e-05	0.000551321
Os01g0237100	1620.09	1.00458	0.236113	4.25466	2.09362e-05	0.000565694
Os02g0282000	44.9976	-2.24443	0.527564	-4.25433	2.09672e-05	0.000565694
Os03g0154000	206.792	2.56484	0.602884	4.25429	2.09712e-05	0.000565694
Os08g0174100	138.952	2.47424	0.581546	4.25458	2.09439e-05	0.000565694
Os10g0473200	52.5485	2.39802	0.56395	4.25219	2.11687e-05	0.000570423
Os03g0188400	39.5726	-3.71697	0.874221	-4.25175	2.12103e-05	0.000570943
Os11g0547800	68.4625	2.42043	0.569578	4.24952	2.14228e-05	0.000574856
Os12g0508100	186.059	1.00877	0.237379	4.24962	2.14138e-05	0.000574856
Os06g0253100	114.272	1.50491	0.354897	4.24041	2.23115e-05	0.000597455
Os02g0738200	29.7541	-4.11467	0.970913	-4.23793	2.25587e-05	0.000602817
Os11g0705200	337.735	-1.81618	0.428597	-4.23749	2.26029e-05	0.00060337
Os11g0604900	39.697	-2.56854	0.606645	-4.23401	2.29559e-05	0.000612157
Os02g0537000	211.839	2.35442	0.556295	4.23233	2.31283e-05	0.000615476
Os07g0252800	239.888	2.67935	0.633345	4.23047	2.33202e-05	0.000619942
Os02g0614200	454.33	1.52608	0.360797	4.22974	2.33958e-05	0.000621308
Os12g0255200	187.466	-1.62215	0.383608	-4.22868	2.35064e-05	0.000622957
Os03g0226300	256.244	1.37016	0.324008	4.22879	2.3495e-05	0.000622957
Os03g0133800	102.657	-1.13302	0.267989	-4.22784	2.35942e-05	0.000624639
Os02g0745100	289.283	1.28903	0.30495	4.22704	2.36784e-05	0.000626222
Os04g0444300	70.5642	-3.54828	0.839653	-4.22588	2.38007e-05	0.000628809
Os04g0599000	452.419	-1.12652	0.266826	-4.22192	2.4223e-05	0.000638652
Os04g0452700	356.513	-1.86621	0.442057	-4.22165	2.42524e-05	0.000638771
Os11g0575600	30.4376	-2.16827	0.513697	-4.22092	2.43303e-05	0.000639983
Os10g0456000	23.7044	-2.28062	0.540845	-4.21677	2.47823e-05	0.000650061
Os12g0130200	22.6212	-3.89473	0.923716	-4.21638	2.48257e-05	0.000650533
Os02g0135200	206.647	-1.82009	0.43182	-4.21493	2.49852e-05	0.00065296
Os04g0379600	585.261	-1.21406	0.288055	-4.21469	2.50117e-05	0.00065296
Os04g0608600	103.853	-2.19034	0.519672	-4.21486	2.49935e-05	0.00065296
Os07g0639500	24.7826	4.58295	1.08739	4.21462	2.502e-05	0.00065296
Os11g0274700	33.0289	-2.65162	0.629549	-4.21194	2.53181e-05	0.00066007
Os05g0534100	269.185	1.07012	0.254625	4.20271	2.63733e-05	0.000685493
Os03g0126600	302.391	1.14576	0.272647	4.20237	2.64129e-05	0.000685828
Os01g0337500	41.6882	-2.20493	0.524918	-4.20053	2.6629e-05	0.000690739
Os08g0114300	598.322	-1.15936	0.276182	-4.19782	2.69495e-05	0.000698349
Os08g0536800	102.302	-2.73879	0.652476	-4.19753	2.69837e-05	0.00069853
Os07g0543100	288.922	2.25393	0.537234	4.19544	2.72341e-05	0.000704302
Os12g0534200	1532.58	1.04268	0.248604	4.19413	2.73923e-05	0.00070768
Os06g0184866	469.124	-1.28214	0.305914	-4.19116	2.77536e-05	0.000716295
Os02g0121300	33420.8	1.6383	0.391147	4.18846	2.80853e-05	0.000722675
Os04g0655400	19.9678	-4.17288	0.996872	-4.18597	2.8395e-05	0.000729912
Os06g0317100	17.7802	-3.29172	0.787261	-4.18123	2.89942e-05	0.000741605
Os04g0103700	94.396	-1.33559	0.319546	-4.17965	2.91952e-05	0.000744522
Os05g0380300	422.249	-1.61952	0.387476	-4.17967	2.91938e-05	0.000744522
Os07g0586100	40.7245	2.75245	0.658512	4.17981	2.91754e-05	0.000744522
Os06g0214800	1326.8	1.37298	0.328605	4.1782	2.93823e-05	0.000748548
Os08g0203100	170.907	-5.07616	1.21632	-4.17336	3.00136e-05	0.00076334
Os06g0107700	184.217	1.60088	0.383666	4.17259	3.01151e-05	0.000764942
Os01g0172800	543.017	1.42927	0.342822	4.16912	3.05783e-05	0.000775173
Os04g0136700	910.417	1.285	0.308308	4.1679	3.07418e-05	0.000777017
Os04g0306750	902.387	1.86076	0.446445	4.16794	3.07362e-05	0.000777017
Os10g0362700	99.6933	2.48888	0.597516	4.16538	3.10838e-05	0.000784117
Os04g0391500	1086.4	-1.31162	0.314881	-4.16545	3.10732e-05	0.000784117
Os03g0431200	1384.24	1.43822	0.34555	4.16213	3.15295e-05	0.00079458
Os06g0125800	174.686	-1.4395	0.346	-4.16039	3.17707e-05	0.000798308
Os04g0612500	21684.1	1.39414	0.335157	4.15966	3.18727e-05	0.00080009
Os06g0698785	251.703	-1.52702	0.367354	-4.15682	3.22708e-05	0.000809292
Os01g0645900	339.623	1.42822	0.343836	4.15379	3.27017e-05	0.000819298
Os01g0635400	183.746	1.18746	0.285938	4.15288	3.28319e-05	0.000821756
Os02g0701900	157.351	-1.14831	0.276616	-4.15126	3.3065e-05	0.000826786
Os01g0954100	4.66065	6.09318	1.46812	4.15032	3.32013e-05	0.000829386
Os05g0261001	9.52762	-5.80756	1.40009	-4.14798	3.35415e-05	0.000836258
Os03g0231950	94.1509	1.41904	0.342346	4.14505	3.39736e-05	0.000844715
Os03g0746700	556.963	1.54037	0.371621	4.14501	3.39794e-05	0.000844715
Os09g0520500	30.5693	2.30329	0.555653	4.14519	3.39527e-05	0.000844715
Os04g0616300	945.084	-1.28566	0.310191	-4.14475	3.4018e-05	0.000844858
Os12g0139400	1056.26	1.7174	0.414469	4.14361	3.41884e-05	0.000847639
Os05g0430300	735.141	-1.01423	0.245433	-4.13241	3.58984e-05	0.000888121
Os05g0375466	16.3195	-5.5759	1.34963	-4.13144	3.60501e-05	0.000891016
Os03g0830900	261.604	-1.21154	0.293373	-4.12969	3.63253e-05	0.000896956
Os07g0249800	28.9635	2.23109	0.540883	4.1249	3.70902e-05	0.000914964
Os10g0479100	165.095	1.30823	0.317266	4.12346	3.73229e-05	0.000918939
Os03g0711100	1361.37	1.26384	0.306667	4.12121	3.76886e-05	0.000927052
Os04g0584600	2727.83	-1.04602	0.253873	-4.12026	3.78451e-05	0.000930013
Os09g0431750	25.8801	2.76165	0.670465	4.11902	3.80492e-05	0.000934133
Os04g0288100	75.9697	-3.83285	0.930749	-4.11803	3.8213e-05	0.000937258
Os06g0110200	11.44	4.60058	1.11727	4.11768	3.82706e-05	0.000937775
Os12g0152100	117.569	1.37488	0.334028	4.11605	3.85429e-05	0.000943547
Os12g0115100	3898.78	1.94494	0.472848	4.11325	3.9013e-05	0.000954147
Os02g0582900	11.4261	-5.02777	1.223	-4.111	3.93946e-05	0.000962562
Os11g0229400	258.59	-1.8263	0.444303	-4.11048	3.94837e-05	0.000963163
Os12g0486800	7.12455	-6.04341	1.47027	-4.11042	3.94942e-05	0.000963163
Os12g0569500	1786.55	1.48013	0.360387	4.10706	4.00727e-05	0.000975419
Os10g0472501	30.3603	3.28754	0.801707	4.10067	4.11953e-05	0.00100179
Os10g0539650	119.301	2.50416	0.611693	4.09381	4.24335e-05	0.00102898
Os03g0684300	70.8196	1.47445	0.3602	4.09343	4.25045e-05	0.00102973
Os01g0203400	41.1964	-1.73392	0.423964	-4.08979	4.31772e-05	0.00104504
Os04g0429600	24.3046	4.26348	1.04285	4.08832	4.34515e-05	0.00105069
Os05g0488600	266.839	1.46901	0.359383	4.08759	4.35879e-05	0.001053
Os10g0416500	748.918	-4.68698	1.1475	-4.08452	4.41681e-05	0.00106601
Os02g0571300	36.1647	2.89674	0.709237	4.0843	4.42102e-05	0.00106603
Os08g0109400	568.834	1.26545	0.309865	4.08386	4.4294e-05	0.00106704
Os03g0236200	25.877	-3.65181	0.895028	-4.0801	4.50158e-05	0.00108235
Os04g0631100	303.025	1.23542	0.30289	4.07878	4.52727e-05	0.00108655
Os03g0320100	343.701	-1.50793	0.36973	-4.07848	4.5331e-05	0.00108693
Os08g0127100	1001.6	-1.93357	0.475084	-4.06995	4.70239e-05	0.00112124
Os08g0535400	769.806	-1.14127	0.280413	-4.06995	4.70234e-05	0.00112124
Os02g0581100	12584.5	2.75381	0.676676	4.06961	4.70927e-05	0.00112184
Os02g0698000	82.6223	2.34062	0.575198	4.06924	4.71671e-05	0.00112257
Os02g0160500	6933.29	2.45511	0.603511	4.06804	4.74101e-05	0.00112626
Os11g0681400	55.456	-2.47761	0.609347	-4.06601	4.78251e-05	0.00113507
Os12g0550800	109.908	-2.68028	0.659462	-4.06435	4.81665e-05	0.00114212
Os06g0694800	4529.92	1.04539	0.257366	4.0619	4.86752e-05	0.00115312
Os02g0251900	21.4348	-6.72457	1.65596	-4.06084	4.88967e-05	0.0011573
Os08g0203300	324.538	-1.36397	0.336251	-4.05641	4.98332e-05	0.00117729
Os06g0690200	163.913	-1.43929	0.355139	-4.05275	5.0618e-05	0.00119458
Os03g0272400	264.902	1.02485	0.252919	4.05207	5.07669e-05	0.00119605
Os10g0554800	179.67	-2.84603	0.702626	-4.05056	5.1095e-05	0.00120268
Os01g0884400	69.8002	-2.16952	0.536057	-4.04718	5.18391e-05	0.00121907
Os04g0507100	977.687	1.03274	0.255894	4.0358	5.44162e-05	0.00127037
Os11g0133001	80.2097	-3.01958	0.748322	-4.03513	5.45712e-05	0.00127283
Os05g0510100	583.854	2.2538	0.558738	4.03374	5.48968e-05	0.00127926
Os01g0928000	429.425	1.30479	0.323726	4.03053	5.56507e-05	0.00129448
Os03g0660400	11.4774	-6.25866	1.55389	-4.02773	5.63174e-05	0.00130881
Os01g0178900	125.965	-1.4916	0.3707	-4.02373	5.72838e-05	0.00132886
Os11g0546900	1509.07	1.39263	0.346565	4.01837	5.86009e-05	0.00135433
Os03g0234500	5.39622	-5.923	1.4744	-4.01723	5.88859e-05	0.00135866
Os06g0602500	221.685	-1.35322	0.336954	-4.01603	5.91858e-05	0.00136323
Os01g0798900	14.1363	-3.18965	0.794574	-4.01429	5.96262e-05	0.00137082
Os02g0261400	19.4275	-3.18271	0.792845	-4.01429	5.96248e-05	0.00137082
Os02g0595200	389.553	1.64337	0.409407	4.01401	5.9695e-05	0.00137117
Os07g0686300	240.543	-2.30934	0.575728	-4.01116	6.04202e-05	0.00138535
Os04g0531750	939.776	1.19652	0.29844	4.00926	6.09098e-05	0.00139408
Os10g0416800	631.617	-1.80528	0.450587	-4.0065	6.16239e-05	0.00140917
Os12g0258700	163.415	-2.43037	0.607078	-4.00338	6.2443e-05	0.00142537
Os01g0915900	60.5406	-3.60505	0.900623	-4.00284	6.25857e-05	0.00142641
Os07g0181100	22.1857	-4.56645	1.14082	-4.00279	6.26001e-05	0.00142641
Os01g0227400	65.8413	1.7698	0.442269	4.00164	6.29037e-05	0.00142953
Os02g0503100	934.676	1.03544	0.258741	4.00185	6.28499e-05	0.00142953
Os06g0232600	32.3261	2.3807	0.595369	3.9987	6.36908e-05	0.00144486
Os11g0173100	10.4193	-4.14469	1.03658	-3.99844	6.37626e-05	0.00144521
Os04g0445200	4777.85	1.81196	0.453338	3.99694	6.41669e-05	0.00145309
Os12g0230133	42.4651	2.46253	0.616304	3.99564	6.45189e-05	0.00145849
Os06g0297400	42.8314	-1.81528	0.454363	-3.99522	6.46332e-05	0.00145949
Os10g0161800	1381.55	1.55926	0.390416	3.99385	6.50101e-05	0.00146572
Os03g0667100	263.719	-1.29258	0.32382	-3.99166	6.5612e-05	0.001478
Os04g0493000	13646.5	1.09002	0.273353	3.98759	6.67471e-05	0.00150093
Os01g0136300	70.6647	2.95861	0.742124	3.98668	6.70038e-05	0.00150407
Os05g0493100	6.41104	-6.36084	1.59544	-3.98688	6.69482e-05	0.00150407
Os05g0104200	23.4291	-3.3832	0.849463	-3.98275	6.81223e-05	0.00152651
Os10g0580900	277.026	-1.43391	0.360543	-3.97708	6.9766e-05	0.00155926
Os01g0363300	831.573	1.44458	0.363445	3.97469	7.04709e-05	0.00157228
Os09g0471500	44.3224	-2.00766	0.505339	-3.97289	7.10047e-05	0.00158144
Os02g0669366	58.1736	-2.54238	0.640197	-3.97125	7.14962e-05	0.00159101
Os07g0630800	2676.48	2.2786	0.574242	3.96801	7.2475e-05	0.00160861
Os01g0199700	48.5481	2.11292	0.533049	3.96384	7.37538e-05	0.00163558
Os09g0468150	43.1355	-1.4618	0.369018	-3.96133	7.45325e-05	0.00165
Os11g0442380	373.682	1.12336	0.283643	3.96047	7.48023e-05	0.00165454
Os03g0268600	21.6008	4.62242	1.16723	3.96017	7.48975e-05	0.00165522
Os03g0370800	75.0106	1.35092	0.341216	3.95914	7.52212e-05	0.00166063
Os04g0622501	25.7587	-3.64303	0.920301	-3.95852	7.54144e-05	0.00166063
Os06g0635200	29.4073	2.06876	0.522579	3.95876	7.53403e-05	0.00166063
Os08g0201700	12.8983	-5.37376	1.35747	-3.95864	7.53769e-05	0.00166063
Os09g0255400	70.9433	-3.46683	0.876283	-3.95629	7.61241e-05	0.00167369
Os08g0103000	975.126	-1.1284	0.285388	-3.95391	7.68837e-05	0.00168783
Os10g0130800	453.594	-1.21886	0.308397	-3.95225	7.7421e-05	0.00169784
Os03g0255500	3365.39	-1.24154	0.314221	-3.95118	7.77678e-05	0.00170034
Os08g0174500	94.5906	1.87817	0.475355	3.95108	7.77998e-05	0.00170034
Os12g0594900	52.6005	3.2101	0.812771	3.94957	7.82922e-05	0.00170965
Os01g0750900	160.859	1.86864	0.473259	3.94844	7.86605e-05	0.0017159
Os06g0104000	255.993	1.02772	0.260404	3.94663	7.92599e-05	0.00172637
Os07g0154900	45.4652	-1.49532	0.378993	-3.94552	7.96258e-05	0.00173287
Os02g0627100	964.893	-1.02056	0.258753	-3.94413	8.00907e-05	0.00174151
Os04g0639300	728.281	1.22175	0.309856	3.94298	8.0476e-05	0.00174841
Os10g0190500	105.025	1.10908	0.282136	3.93101	8.45898e-05	0.00183468
Os03g0110900	2664.06	1.17258	0.298349	3.93021	8.48726e-05	0.00183926
Os07g0561500	913.225	2.08613	0.531045	3.92835	8.55309e-05	0.0018473
Os01g0149800	3304.74	1.75274	0.446213	3.92803	8.56431e-05	0.00184816
Os02g0233200	33.2006	-2.01123	0.512862	-3.92158	8.7969e-05	0.00189676
Os02g0827900	532.045	-1.29997	0.331829	-3.91758	8.94425e-05	0.00192619
Os04g0169100	907.468	-1.83551	0.468544	-3.91747	8.94836e-05	0.00192619
Os05g0517200	1291.86	-1.1752	0.300065	-3.91647	8.98546e-05	0.00193255
Os05g0317700	328.536	-1.09775	0.280409	-3.91481	9.0475e-05	0.00194427
Os03g0313800	265.089	1.76431	0.450771	3.91399	9.07851e-05	0.0019493
Os03g0184050	176.602	1.96064	0.501157	3.91222	9.14509e-05	0.00196032
Os05g0495000	378.086	1.54661	0.395487	3.91064	9.20533e-05	0.00197158
Os12g0170800	40.1289	-3.7019	0.947503	-3.90701	9.34459e-05	0.00199475
Os03g0322900	385.802	2.59416	0.663963	3.90708	9.34166e-05	0.00199475
Os02g0693500	845.98	1.05957	0.271285	3.90575	9.39331e-05	0.00200183
Os07g0660100	1025.33	1.97906	0.506701	3.90577	9.39251e-05	0.00200183
Os10g0546900	192.398	2.08573	0.534175	3.90458	9.43896e-05	0.00200901
Os06g0644700	251.574	-1.07445	0.275184	-3.90448	9.44264e-05	0.00200901
Os02g0154000	19.3194	-2.44166	0.62572	-3.90216	9.53391e-05	0.00202675
Os05g0572000	29.683	2.16018	0.554273	3.89732	9.72625e-05	0.00206494
Os06g0562300	45.1676	-2.07348	0.533078	-3.88963	0.000100396	0.00212195
Os01g0885300	1935.78	-1.04213	0.268107	-3.88699	0.000101494	0.0021434
Os12g0515500	277.336	1.09946	0.282983	3.88525	0.000102226	0.00215531
Os01g0952100	137.645	1.22525	0.315536	3.88309	0.000103137	0.00217096
Os03g0664800	166.611	-2.29002	0.589802	-3.8827	0.000103304	0.00217103
Os09g0314200	100.39	-1.96309	0.505626	-3.88249	0.000103392	0.00217103
Os10g0185100	913.195	1.03371	0.266281	3.882	0.0001036	0.00217356
Os05g0582350	515.713	1.02239	0.263403	3.88146	0.000103831	0.00217663
Os11g0641500	132.765	-5.50198	1.41914	-3.87699	0.000105757	0.0022152
Os07g0162900	380.914	2.11436	0.545711	3.87451	0.000106837	0.00223237
Os09g0561600	8.68936	-5.0946	1.31484	-3.87469	0.000106759	0.00223237
Os05g0342100	8.54037	-6.00401	1.5498	-3.87407	0.000107035	0.00223467
Os03g0679700	3117.94	1.33728	0.345226	3.87366	0.000107215	0.00223635
Os01g0678000	22.1121	-3.53561	0.913601	-3.86997	0.000108849	0.00226519
Os11g0607200	1316.24	-1.19298	0.308294	-3.86962	0.000109003	0.00226656
Os05g0555700	241.492	-1.35797	0.351389	-3.86458	0.000111282	0.00231207
Os08g0455900	32.6235	2.9635	0.767963	3.85892	0.000113891	0.00236055
Os03g0851700	479.304	1.25252	0.324924	3.8548	0.000115824	0.00239674
Os07g0162700	33.3994	2.86076	0.743116	3.84969	0.000118269	0.00244537
Os07g0613800	104.642	2.52617	0.656876	3.84573	0.000120192	0.00247914
Os10g0536400	357.63	-1.75462	0.456337	-3.84501	0.000120548	0.00248449
Os01g0172100	531.263	1.09674	0.285284	3.84439	0.000120854	0.00248879
Os01g0714600	72.2784	-2.40549	0.626027	-3.84247	0.000121802	0.00250434
Os12g0240900	17.759	-5.28476	1.37561	-3.84177	0.000122151	0.00250547
Os02g0671800	92.1992	-1.79904	0.468258	-3.842	0.000122037	0.00250547
Os06g0125600	294.606	-1.81586	0.472658	-3.8418	0.000122133	0.00250547
Os05g0247800	34.4424	-4.7016	1.22407	-3.84096	0.000122553	0.00251169
Os04g0105400	140.475	1.78015	0.46353	3.84041	0.000122828	0.00251533
Os11g0526000	49.5693	1.68668	0.439397	3.83862	0.000123726	0.00252648
Os05g0534000	80.6796	1.12148	0.292176	3.83836	0.000123858	0.00252648
Os06g0314501	11.2183	-5.01673	1.307	-3.83835	0.000123864	0.00252648
Os03g0412400	77.4942	-2.15406	0.561305	-3.83759	0.000124246	0.00253225
Os09g0343200	4899.98	-1.38757	0.361711	-3.83613	0.000124988	0.00254535
Os06g0689600	99.5009	-1.40981	0.367633	-3.83484	0.000125644	0.00255669
Os09g0417600	112.352	-2.87156	0.749295	-3.83235	0.000126926	0.0025787
Os01g0945300	52.4851	1.5527	0.405279	3.83119	0.000127526	0.00258679
Os06g0548500	22.7915	3.13344	0.817839	3.83136	0.000127435	0.00258679
Os09g0565200	499.637	1.69801	0.443735	3.82662	0.000129915	0.00263316
Os08g0507100	18.1864	-7.54388	1.97159	-3.8263	0.000130084	0.00263451
Os03g0332100	536.156	1.10213	0.288328	3.82248	0.000132114	0.00267351
Os11g0121500	108.18	1.05382	0.275716	3.82213	0.000132304	0.00267511
Os08g0386200	274.32	-1.94891	0.509925	-3.82195	0.000132401	0.00267511
Os01g0302000	229.786	1.64311	0.430293	3.81858	0.000134222	0.00270976
Os01g0138400	30.2241	-3.12715	0.818982	-3.81834	0.00013435	0.00271022
Os09g0527500	45.3245	1.59779	0.418592	3.81706	0.00013505	0.00272219
Os09g0266000	1029.55	1.07126	0.280712	3.81623	0.000135508	0.00272929
Os06g0158000	49.3862	-1.62401	0.425608	-3.81573	0.000135783	0.00273269
Os01g0651400	68.7004	1.80406	0.473164	3.81276	0.000137422	0.00276351
Os06g0523300	342.249	1.78649	0.468759	3.8111	0.000138351	0.00278001
Os07g0225300	225.157	-1.46031	0.383324	-3.8096	0.000139194	0.00279475
Os09g0502000	128.995	2.08318	0.547369	3.8058	0.000141344	0.00283129
Os09g0322400	55.1844	-1.70591	0.448404	-3.80439	0.000142152	0.00284526
Os07g0614100	90.2884	1.29004	0.339383	3.80113	0.000144036	0.00288072
Os08g0531000	49.8685	2.47291	0.650705	3.80036	0.000144485	0.00288745
Os10g0330000	22761.5	1.48354	0.390392	3.80012	0.000144628	0.00288806
Os03g0820300	51.6773	2.16491	0.570064	3.79765	0.000146072	0.00291464
Os02g0803600	18.3514	2.49513	0.657137	3.79696	0.000146479	0.00291821
Os03g0182800	160.992	-1.86885	0.49223	-3.7967	0.000146637	0.00291909
Os05g0171200	167.17	2.33232	0.614417	3.79599	0.000147056	0.00292517
Os11g0525700	169.927	1.29769	0.341909	3.79543	0.00014739	0.00292954
Os11g0173900	67.2347	2.10972	0.55612	3.79364	0.000148452	0.00294838
Os08g0457400	56.4399	-1.84495	0.48652	-3.79214	0.000149355	0.00296401
Os06g0225300	405.39	-1.05654	0.278655	-3.79158	0.000149693	0.00296844
Os09g0482660	18.9735	2.45544	0.647721	3.79089	0.000150111	0.00297443
Os02g0161601	67.4422	1.65948	0.438145	3.78752	0.00015216	0.00301037
Os02g0157300	18.2124	3.26073	0.861048	3.78693	0.00015252	0.00301285
Os03g0816800	44.3212	-2.08098	0.549752	-3.78531	0.000153516	0.0030302
Os03g0782200	3104.65	1.59274	0.420794	3.78509	0.000153655	0.00303062
Os01g0771000	144.238	2.2723	0.600478	3.78414	0.000154238	0.00303745
Os01g0229500	205.674	2.06345	0.545515	3.78257	0.000155219	0.00305209
Os03g0699700	32.6141	-1.6951	0.448205	-3.78197	0.000155595	0.00305714
Os01g0706800	23.5671	2.70047	0.714302	3.78057	0.000156472	0.00307201
Os01g0201100	128.609	-1.53156	0.405184	-3.77991	0.000156884	0.00307583
Os02g0827400	119.098	1.66042	0.439278	3.77988	0.000156906	0.00307583
Os12g0427600	12.3744	7.04371	1.86361	3.77961	0.000157073	0.00307677
Os12g0131100	201.464	-1.40551	0.372033	-3.77791	0.000158149	0.00309549
Os08g0188151	246.206	2.14769	0.568606	3.77712	0.000158654	0.003103
Os08g0137900	5.78478	-6.37439	1.68801	-3.77627	0.000159197	0.00311125
Os02g0570500	11.4978	3.09275	0.819184	3.7754	0.000159752	0.00311734
Os10g0573700	6877.99	1.23934	0.328423	3.7736	0.000160912	0.00313046
Os07g0538300	83.4669	-3.08403	0.817247	-3.77368	0.000160855	0.00313046
Os02g0178300	28.4054	2.25603	0.598063	3.77222	0.000161802	0.00314302
Os05g0508900	2225.47	1.47147	0.390146	3.77159	0.000162211	0.00314621
Os01g0274100	22.6428	2.69464	0.714822	3.76966	0.000163471	0.00316825
Os02g0209300	88.2972	-2.23147	0.592527	-3.76602	0.000165867	0.00320985
Os08g0529000	11.1196	-5.03952	1.33866	-3.76459	0.00016682	0.00322101
Os06g0546500	20.4657	-6.47498	1.72392	-3.75596	0.000172681	0.00332169
Os02g0633066	44.0907	-3.15293	0.839509	-3.75568	0.000172869	0.0033228
Os07g0587500	223.632	-1.01866	0.271338	-3.75423	0.000173874	0.00333714
Os10g0368100	137.968	1.42355	0.379336	3.75275	0.000174906	0.00335444
Os04g0552300	123.406	1.44588	0.38532	3.75241	0.000175143	0.00335646
Os05g0568600	393.381	1.32779	0.354023	3.75057	0.000176431	0.00337612
Os01g0566800	1215.29	-1.09268	0.291382	-3.75001	0.000176829	0.00338121
Os09g0456700	126.339	1.71997	0.45879	3.74893	0.00017759	0.00339324
Os08g0203201	68.5079	-3.80596	1.01562	-3.74745	0.000178644	0.00341085
Os04g0458300	266.682	-1.23573	0.329859	-3.74625	0.000179497	0.00342392
Os08g0504500	2087.23	1.36488	0.364516	3.74435	0.000180858	0.00344287
Os04g0482900	909.12	1.2306	0.328737	3.74341	0.000181543	0.00345334
Os11g0128400	26.41	-6.05849	1.619	-3.74212	0.000182473	0.00346527
Os03g0439500	609.2	1.35566	0.362285	3.74198	0.000182574	0.00346527
Os09g0471200	7.77046	-6.08192	1.62599	-3.74044	0.0001837	0.00348405
Os04g0503600	479.426	-1.04282	0.278842	-3.73981	0.000184161	0.00349023
Os07g0677500	28.7061	-8.85108	2.36815	-3.73756	0.000185818	0.00351904
Os09g0457100	93.591	2.29406	0.613972	3.73642	0.000186662	0.00352981
Os10g0136400	22.47	3.4707	0.929035	3.73582	0.000187108	0.00353303
Os07g0670600	436.657	1.21316	0.324904	3.73391	0.000188532	0.00355731
Os03g0764900	17.6406	2.86768	0.768139	3.73327	0.000189006	0.00356364
Os04g0115700	1100.85	-2.10013	0.562692	-3.73228	0.000189751	0.00357244
Os05g0162000	70.9305	-2.40999	0.645774	-3.73194	0.00019001	0.00357469
Os09g0455300	98.0786	1.42771	0.382743	3.73022	0.000191313	0.00359394
Os09g0370500	191.596	-1.04043	0.278979	-3.72942	0.000191923	0.00360276
Os05g0432200	45.148	2.71542	0.728455	3.72764	0.000193278	0.00362295
Os06g0659200	177.187	1.49086	0.399947	3.72764	0.000193281	0.00362295
Os02g0567900	372.223	1.58704	0.425907	3.72625	0.00019435	0.00363769
Os01g0298400	9.21489	-5.60476	1.50567	-3.72243	0.000197311	0.00368859
Os03g0559700	1036.44	1.50311	0.403804	3.72238	0.000197357	0.00368859
Os02g0609900	11.2193	-6.29748	1.69196	-3.722	0.000197655	0.00369147
Os05g0391600	1065.04	-1.04594	0.281087	-3.72107	0.000198384	0.0037024
Os11g0118400	66.6201	-2.3903	0.642628	-3.71957	0.000199566	0.00371905
Os10g0450800	218.628	1.14801	0.308662	3.71931	0.00019977	0.00372015
Os02g0773500	812.626	1.65174	0.444416	3.71664	0.000201886	0.00375412
Os08g0269600	244.019	1.371	0.368915	3.7163	0.000202165	0.00375658
Os03g0231800	351.405	2.11843	0.570684	3.71209	0.000205557	0.00381134
Os04g0623200	334.815	1.57426	0.424156	3.71152	0.000206021	0.00381169
Os08g0206600	54.6209	1.97312	0.531622	3.71152	0.000206021	0.00381169
Os09g0510200	123.671	1.05158	0.283309	3.71177	0.000205812	0.00381169
Os07g0170016	346.306	2.32758	0.627556	3.70896	0.000208109	0.00384755
Os03g0411600	142.186	-1.03969	0.280404	-3.70781	0.000209056	0.00386227
Os05g0496100	61.0141	1.53238	0.413461	3.70622	0.000210376	0.00388386
Os02g0125700	4180.32	1.06772	0.288111	3.70593	0.000210614	0.0038854
Os09g0341600	22.9012	-3.86309	1.04246	-3.70576	0.000210762	0.0038854
Os05g0500450	250.539	2.21647	0.59838	3.70413	0.000212121	0.00390486
Os01g0373800	7.30145	-6.27264	1.69459	-3.70158	0.000214264	0.00393302
Os10g0565500	293.392	1.05496	0.284994	3.70168	0.000214176	0.00393302
Os03g0226400	202.263	1.98442	0.536262	3.70047	0.0002152	0.00394456
Os07g0686800	14.4984	-3.37048	0.910801	-3.70056	0.000215123	0.00394456
Os04g0253000	426.741	2.22299	0.60102	3.6987	0.000216703	0.00396645
Os06g0220100	68.7915	-1.03813	0.281189	-3.69194	0.000222549	0.00406477
Os04g0453400	164.675	1.42301	0.385524	3.69111	0.000223277	0.00407227
Os06g0293500	7.79602	-6.27903	1.70109	-3.69119	0.000223207	0.00407227
Os02g0588700	334.943	1.42932	0.387587	3.68774	0.000226256	0.00412075
Os04g0109100	27.1936	-3.9351	1.06718	-3.68737	0.000226586	0.0041238
Os07g0105000	31.8745	-4.15643	1.12726	-3.68719	0.000226745	0.0041238
Os01g0940600	481.131	1.27286	0.345347	3.68573	0.000228046	0.00414453
Os01g0227700	189.654	-1.6527	0.44843	-3.68551	0.000228242	0.00414516
Os04g0540900	226.069	-1.51338	0.41067	-3.68515	0.000228568	0.00414814
Os11g0173366	149.199	-3.48227	0.945284	-3.68384	0.000229748	0.00416661
Os01g0585300	5187.58	2.21329	0.601229	3.68127	0.000232072	0.00420283
Os08g0200500	104.007	-1.04173	0.283	-3.68101	0.000232311	0.00420419
Os12g0629700	34.6679	-3.52682	0.958252	-3.68048	0.000232797	0.00421002
Os01g0347100	105.56	-1.41975	0.385909	-3.67896	0.000234183	0.00423211
Os03g0249700	969.084	1.50082	0.40799	3.67857	0.000234546	0.0042327
Os05g0397650	344.474	-1.12514	0.305893	-3.67823	0.000234862	0.00423543
Os02g0815300	1816.35	1.09676	0.298392	3.67556	0.000237328	0.0042739
Os07g0682800	377.93	-1.09692	0.298571	-3.67391	0.000238867	0.00429861
Os02g0702100	18.9277	3.38115	0.92046	3.67333	0.000239412	0.0043054
Os08g0135300	55.156	1.49229	0.406352	3.67241	0.000240271	0.0043148
Os12g0638700	216.404	1.11623	0.304096	3.67066	0.000241925	0.00434003
Os06g0640599	31.4453	3.60465	0.982043	3.67057	0.000242014	0.00434003
Os03g0333400	9585.83	1.59442	0.434606	3.66866	0.000243825	0.00436945
Os12g0625000	2328.33	1.00241	0.273336	3.66733	0.000245101	0.00438926
Os01g0727100	498.2	-1.48452	0.404848	-3.66684	0.000245563	0.0043914
Os02g0230875	52.9687	1.22713	0.334652	3.66688	0.000245532	0.0043914
Os03g0170500	1865.19	2.15233	0.58702	3.66654	0.000245856	0.00439359
Os03g0580200	84.3843	1.83597	0.501017	3.66448	0.000247845	0.0044199
Os03g0808300	536.417	1.98131	0.541449	3.65929	0.000252919	0.00450414
Os08g0189600	20.9131	-3.08585	0.843451	-3.6586	0.000253596	0.00451305
Os02g0326500	313.392	-1.2314	0.336793	-3.65626	0.000255919	0.00454821
Os04g0412100	354.314	1.58714	0.43409	3.65626	0.000255925	0.00454821
Os02g0579000	624.121	1.62593	0.444975	3.65399	0.000258198	0.00458543
Os03g0840200	161.975	1.59254	0.436363	3.64957	0.000262675	0.00465527
Os04g0521700	27.6072	1.74036	0.477167	3.64728	0.00026503	0.00469054
Os12g0592900	79.8905	-2.39466	0.656615	-3.64698	0.000265346	0.00469289
Os09g0482900	106.13	1.65113	0.452769	3.64674	0.000265587	0.00469393
Os02g0819600	156.282	-1.49473	0.40997	-3.64594	0.000266416	0.00470534
Os02g0730000	111.983	-2.14014	0.587272	-3.6442	0.000268228	0.00473202
Os10g0559900	76.8514	1.37743	0.378502	3.63917	0.000273518	0.00481421
Os10g0542900	312.735	-2.39003	0.656812	-3.63883	0.00027388	0.00481729
Os06g0284500	522.408	1.00707	0.276832	3.63786	0.000274913	0.00482958
Os02g0556800	6828.7	1.16433	0.320412	3.63386	0.000279217	0.0048944
Os05g0537100	169.578	-2.00916	0.553236	-3.63166	0.000281602	0.00492948
Os04g0455700	76.1445	2.2195	0.61144	3.62995	0.000283479	0.00495895
Os04g0674700	58.2512	-1.74308	0.480266	-3.62941	0.000284065	0.00496581
Os12g0156000	92.8332	1.94321	0.535513	3.62869	0.00028486	0.00497632
Os02g0162600	62.233	3.83594	1.05745	3.62753	0.000286146	0.0049954
Os06g0574100	550.216	1.47437	0.406616	3.62594	0.000287911	0.00501938
Os07g0538200	34.1936	-2.24449	0.619158	-3.62507	0.000288882	0.0050329
Os06g0699301	92.069	-1.55877	0.430035	-3.62474	0.00028925	0.00503589
Os08g0508500	82.7292	1.9817	0.546983	3.62296	0.000291249	0.00506382
Os05g0142000	91.7636	1.38617	0.383001	3.61923	0.000295481	0.00512353
Os06g0180666	453.256	1.05811	0.29238	3.61896	0.000295791	0.00512545
Os03g0649000	51.5412	1.14799	0.31742	3.61664	0.000298456	0.00516814
Os06g0282000	75.8525	-1.73627	0.480161	-3.61602	0.000299163	0.00517689
Os11g0542100	84.1663	2.39553	0.662677	3.61492	0.000300435	0.00519541
Os04g0474700	92.5596	1.3274	0.367439	3.61257	0.000303172	0.0052392
Os11g0543600	28.3737	1.94723	0.539047	3.61237	0.000303415	0.00523987
Os05g0541301	43.3957	2.39127	0.662014	3.61211	0.000303718	0.00524158
Os02g0181300	845.047	-1.92506	0.533068	-3.61128	0.000304693	0.00525488
Os01g0893400	292.998	1.11544	0.308989	3.60997	0.000306235	0.00527793
Os01g0916000	26.3813	-4.17826	1.15779	-3.60882	0.000307591	0.00529775
Os12g0186600	373.442	-2.01542	0.558719	-3.60721	0.000309509	0.0053256
Os03g0243100	1518.2	1.06729	0.295984	3.60591	0.000311056	0.00534666
Os07g0185900	9280.45	2.05649	0.570453	3.60501	0.000312144	0.00535104
Os08g0425800	1400.7	1.35924	0.377028	3.60514	0.000311985	0.00535104
Os11g0484000	1659.89	1.00913	0.27999	3.60414	0.000313183	0.00536169
Os04g0684100	378.057	-1.26529	0.351246	-3.6023	0.00031542	0.00539639
Os01g0850900	703.625	1.70358	0.472951	3.60202	0.000315758	0.005398
Os04g0487400	21.8036	-4.61322	1.28085	-3.6017	0.000316144	0.005398
Os09g0351700	196.991	-1.56538	0.43461	-3.6018	0.000316017	0.005398
Os06g0500700	31.5523	1.79227	0.497753	3.60072	0.000317339	0.0054148
Os03g0837300	101.721	1.63844	0.455321	3.59844	0.000320133	0.00545883
Os03g0610800	196.658	1.11669	0.31039	3.59772	0.000321023	0.00546676
Os07g0110300	227.364	1.06672	0.296544	3.59716	0.000321706	0.00547476
Os05g0343400	3556.78	-1.00162	0.278519	-3.59623	0.000322863	0.00549081
Os10g0491450	23.0337	-3.65401	1.01615	-3.59596	0.000323203	0.00549296
Os01g0676200	688.849	1.46026	0.406524	3.59207	0.000328066	0.00556455
Os02g0534400	146.503	1.45375	0.404806	3.59124	0.00032911	0.00557859
Os02g0620200	293.813	2.15757	0.600917	3.59047	0.000330087	0.00559145
Os10g0509401	366.502	2.25073	0.626975	3.58983	0.000330897	0.0055941
Os02g0216300	5914.91	-1.21169	0.337525	-3.58992	0.000330774	0.0055941
Os11g0264000	14.8926	-4.92538	1.37224	-3.58931	0.000331557	0.00559805
Os04g0209200	174.844	-1.83859	0.512266	-3.58913	0.000331785	0.00559805
Os05g0144900	58.1636	-1.20364	0.335345	-3.58925	0.000331627	0.00559805
Os06g0116600	748.389	1.26629	0.352858	3.58867	0.000332375	0.00560433
Os02g0113200	8.63348	-8.25295	2.30017	-3.58797	0.000333258	0.00561553
Os03g0201500	4.96871	-5.57213	1.55342	-3.587	0.000334507	0.00563288
Os09g0551400	14.8179	-4.43954	1.23819	-3.5855	0.000336437	0.00566167
Os05g0367400	132.843	-1.47304	0.410859	-3.58528	0.00033672	0.00566271
Os01g0661650	10.2825	3.18399	0.888767	3.58248	0.000340352	0.00571485
Os03g0786500	100.454	1.33294	0.372241	3.58086	0.000342466	0.00574055
Os01g0546800	321.554	-1.01425	0.283267	-3.58053	0.000342894	0.00574398
Os10g0501500	2409.54	-1.01516	0.28364	-3.57903	0.000344876	0.00576966
Os01g0690800	130.489	-1.6256	0.454381	-3.57762	0.000346739	0.00579704
Os06g0600301	6.61034	3.71849	1.03993	3.57571	0.000349277	0.00582884
Os07g0626800	1012.45	1.65133	0.4618	3.57586	0.000349076	0.00582884
Os10g0130701	9.84405	3.81886	1.06821	3.57501	0.00035022	0.00583623
Os06g0524400	238.858	1.49275	0.417616	3.57446	0.000350947	0.00584456
Os05g0475700	1110.62	1.13264	0.316938	3.57368	0.000351999	0.00585829
Os02g0773200	56.7049	1.228	0.343672	3.57316	0.000352694	0.00586605
Os01g0113200	40.4033	-1.90038	0.53188	-3.57296	0.000352971	0.00586686
Os08g0202200	29.9534	-2.30448	0.645213	-3.57166	0.000354724	0.00589219
Os11g0603000	6.04931	-5.56972	1.56039	-3.56944	0.000357741	0.00593098
Os03g0751100	162.143	1.76658	0.494918	3.56943	0.000357753	0.00593098
Os07g0575500	42.0387	1.42757	0.399967	3.56923	0.000358038	0.00593188
Os07g0559400	789.645	1.34556	0.377034	3.5688	0.000358619	0.00593767
Os03g0342100	118.36	-1.19636	0.335255	-3.56851	0.000359022	0.00594052
Os04g0537100	501.618	1.63191	0.457338	3.56829	0.000359323	0.00594168
Os01g0172600	49.2011	1.34056	0.37584	3.56685	0.000361303	0.00596194
Os07g0541500	160.827	-1.34703	0.377667	-3.56672	0.000361477	0.00596194
Os03g0348200	66.3058	2.92315	0.819605	3.56654	0.000361732	0.00596231
Os01g0978400	499.949	1.02656	0.288108	3.56309	0.000366509	0.00602943
Os03g0381500	68.1929	2.06028	0.578439	3.5618	0.000368318	0.00605533
Os09g0341001	23.6546	2.97367	0.834959	3.56146	0.0003688	0.00605936
Os10g0445900	60.3108	-2.44532	0.686841	-3.56024	0.000370523	0.00608377
Os10g0144700	53.5092	3.28929	0.924509	3.55788	0.000373864	0.0061308
Os05g0542300	77.8256	1.28154	0.360192	3.55793	0.000373787	0.0061308
Os04g0468000	253.761	-4.28116	1.20343	-3.55746	0.000374461	0.00613667
Os12g0594000	72.6521	1.60076	0.450058	3.55679	0.000375417	0.00614841
Os01g0648600	53.2271	-1.91598	0.539227	-3.5532	0.00038058	0.00622503
Os10g0508700	3436.79	-1.05326	0.296471	-3.55267	0.000381346	0.00622958
Os04g0562800	289.544	-1.77842	0.500769	-3.55138	0.000383211	0.00624817
Os07g0518100	72.1809	-1.90202	0.535631	-3.55099	0.000383788	0.0062536
Os01g0332200	7.29774	4.57308	1.28832	3.54965	0.000385743	0.00628147
Os05g0417600	286.587	-1.50093	0.423217	-3.54648	0.000390409	0.0063494
Os07g0273600	67.3262	-1.18036	0.332854	-3.54618	0.000390861	0.00635273
Os11g0639300	614.373	-1.12032	0.316393	-3.54091	0.000398755	0.00646875
Os06g0239100	50.1279	-2.11569	0.597864	-3.53874	0.000402038	0.0065179
Os03g0326500	1696.76	1.0241	0.289466	3.53791	0.000403314	0.00653114
Os09g0513200	75.9721	1.07863	0.304882	3.53787	0.000403364	0.00653114
Os02g0178100	3333.04	1.52699	0.431837	3.53603	0.000406186	0.00656855
Os06g0328400	9.36978	-4.13549	1.17169	-3.52952	0.000416308	0.00671532
Os08g0140300	85.2153	-3.8025	1.07774	-3.52821	0.000418373	0.00674439
Os01g0669100	314.099	-1.71521	0.486274	-3.52725	0.000419904	0.00676483
Os03g0326200	43.7539	-2.88463	0.818346	-3.52496	0.000423552	0.00681078
Os05g0324100	61.6992	1.16385	0.33016	3.52511	0.000423306	0.00681078
Os01g0104350	276.202	1.56436	0.443821	3.52475	0.000423883	0.00681184
Os04g0677100	13.7486	2.81248	0.798274	3.5232	0.000426365	0.00684317
Os04g0371000	76.1894	-3.62638	1.03004	-3.52063	0.000430525	0.00689714
Os02g0532500	1540.49	-1.23888	0.351916	-3.52037	0.000430945	0.00689943
Os07g0509700	2027.28	1.13036	0.321141	3.51983	0.000431824	0.00690918
Os01g0627500	79.0093	1.73116	0.491926	3.51915	0.000432931	0.00692258
Os06g0601600	75.2302	1.23797	0.351988	3.51707	0.000436336	0.00696834
Os07g0633200	209.975	1.70765	0.48575	3.51548	0.000438956	0.00699714
Os03g0293100	4587.32	1.30427	0.371031	3.51527	0.000439313	0.00699849
Os01g0229400	192.198	1.51499	0.431347	3.51223	0.000444369	0.00706657
Os03g0410900	175.571	1.55863	0.443775	3.5122	0.000444413	0.00706657
Os03g0161600	8.72118	-3.43746	0.978892	-3.51158	0.000445448	0.00707866
Os06g0153200	234.787	-1.93641	0.551771	-3.50945	0.000449042	0.00712906
Os12g0632800	956.179	-1.47558	0.42059	-3.50837	0.000450869	0.0071427
Os06g0728700	1979.14	1.03549	0.295177	3.50803	0.000451439	0.00714732
Os02g0472700	37.6936	-1.62441	0.463216	-3.5068	0.000453527	0.00716272
Os02g0186800	111.732	1.4802	0.422235	3.50562	0.000455549	0.00719023
Os05g0474800	105.614	-3.76094	1.07308	-3.5048	0.000456944	0.00720781
Os07g0522500	602.241	-1.66774	0.476495	-3.50001	0.000465238	0.00732964
Os02g0227100	55.3578	-1.78063	0.508949	-3.49865	0.000467629	0.00736278
Os09g0463300	287.615	1.85452	0.530262	3.49737	0.000469878	0.00738914
Os02g0622500	158.398	1.05702	0.302271	3.49694	0.000470623	0.00739633
Os06g0686500	16.9075	2.0819	0.595406	3.4966	0.000471225	0.00740125
Os11g0516000	682.373	-1.07369	0.307134	-3.49582	0.000472612	0.0074184
Os10g0489000	37.4124	1.59544	0.456434	3.49544	0.00047328	0.00741992
Os09g0455400	161.994	1.05395	0.301639	3.49406	0.000475738	0.00744482
Os03g0668500	568.131	1.74127	0.498505	3.49299	0.000477653	0.00746913
Os03g0196250	64.7947	1.69729	0.485957	3.49268	0.000478203	0.00746974
Os06g0682900	206.69	1.35255	0.387433	3.49104	0.000481137	0.00751101
Os11g0707300	53.2277	-1.7777	0.50956	-3.4887	0.000485378	0.00756341
Os01g0563000	2574.13	-1.15932	0.332351	-3.48825	0.000486188	0.00757144
Os09g0308600	43.4166	1.98832	0.570181	3.48718	0.000488143	0.00759728
Os03g0102200	123.631	1.67366	0.480114	3.48596	0.000490365	0.0076268
Os09g0127300	621.06	-1.53497	0.440348	-3.48582	0.000490634	0.0076268
Os09g0519150	160.043	1.17638	0.33758	3.48473	0.000492628	0.00764853
Os03g0389700	385.645	1.6179	0.464415	3.48373	0.000494477	0.00766798
Os07g0639400	33.2316	2.41863	0.694258	3.48377	0.000494413	0.00766798
Os01g0737500	12.814	-4.5682	1.31159	-3.48294	0.000495931	0.00768225
Os10g0536100	921.412	-1.13461	0.325764	-3.48291	0.000495995	0.00768225
Os05g0569800	25.7134	1.76695	0.507377	3.48251	0.00049674	0.00768914
Os04g0633300	34.1863	-1.57907	0.453463	-3.48225	0.000497215	0.00769186
Os01g0365000	26.2949	-2.81779	0.809481	-3.48098	0.000499576	0.00771909
Os07g0181500	881.453	1.10417	0.317198	3.48101	0.000499524	0.00771909
Os04g0431000	91.913	1.4339	0.412307	3.47775	0.000505636	0.00780802
Os10g0524600	565.207	1.24012	0.356652	3.47711	0.000506857	0.00782217
Os11g0177200	215.593	1.61422	0.4645	3.47518	0.000510502	0.00787369
Os11g0427800	74.4058	2.13231	0.613696	3.47454	0.000511726	0.00788784
Os02g0121500	1311.77	1.24899	0.359619	3.47308	0.000514513	0.00792603
Os07g0673550	178.205	1.77879	0.512493	3.47086	0.000518793	0.00797761
Os04g0568600	26.6525	2.61616	0.753789	3.47068	0.000519147	0.00797827
Os03g0775000	570.117	1.0465	0.301578	3.47007	0.000520326	0.00798734
Os07g0691300	431.342	-1.34988	0.389009	-3.47005	0.000520359	0.00798734
Os01g0590300	4.11773	-5.13971	1.48187	-3.4684	0.000523561	0.00802161
Os02g0532800	1706.66	1.80428	0.520225	3.46826	0.000523841	0.00802161
Os05g0336000	83.727	-1.40917	0.406257	-3.46867	0.000523048	0.00802161
Os09g0383300	39.7546	-4.95802	1.42953	-3.4683	0.000523766	0.00802161
Os06g0729800	22.1665	2.38995	0.689509	3.46616	0.000527948	0.00807007
Os08g0521800	2220.71	1.30717	0.377315	3.46439	0.000531436	0.00811372
Os01g0743200	61.0622	-1.89184	0.546218	-3.46353	0.000533132	0.00813127
Os10g0471000	25.7301	1.68045	0.48519	3.46349	0.000533219	0.00813127
Os08g0172300	141.865	1.39681	0.403396	3.46263	0.000534931	0.0081477
Os06g0256500	1307.64	1.25289	0.361989	3.46112	0.000537939	0.00818382
Os03g0743500	226.197	-1.55707	0.450129	-3.45918	0.000541831	0.00823814
Os11g0109500	20.3972	-2.45419	0.709651	-3.45831	0.000543568	0.00825966
Os11g0701000	8.03493	-4.88966	1.41417	-3.45761	0.000544993	0.00827642
Os02g0617300	1910.86	-1.02142	0.295474	-3.45689	0.000546438	0.00829345
Os05g0530300	132.563	1.26454	0.365937	3.45562	0.000549035	0.00832304
Os03g0816500	328.409	1.16837	0.338148	3.45521	0.000549862	0.00832351
Os08g0178700	1147.64	-1.03717	0.300196	-3.45497	0.000550363	0.00832351
Os09g0442400	224.632	1.72097	0.498066	3.4553	0.000549683	0.00832351
Os10g0166300	994.648	1.33023	0.385133	3.45396	0.00055241	0.00834955
Os12g0188566	70.8332	1.38703	0.401853	3.45158	0.000557319	0.00841385
Os01g0292900	1373.9	-1.03741	0.300605	-3.45109	0.000558336	0.00842425
Os07g0572900	310.197	1.4314	0.414871	3.45023	0.00056011	0.00844605
Os06g0132400	1883.93	1.75213	0.508003	3.44906	0.000562544	0.00847778
Os11g0482901	113.343	-2.22438	0.645057	-3.44835	0.000564032	0.00849024
Os12g0226900	64.115	1.80526	0.523595	3.44781	0.000565149	0.00850207
Os03g0717900	136.572	1.95842	0.568561	3.44452	0.000572078	0.00858536
Os07g0686900	242.469	-1.3076	0.379632	-3.44439	0.000572357	0.00858536
Os03g0773300	199.512	-2.37144	0.688812	-3.44279	0.000575742	0.00862103
Os05g0592300	407.58	1.19007	0.345717	3.44231	0.000576777	0.00863149
Os07g0148200	243.865	1.51817	0.441107	3.44171	0.00057804	0.00864232
Os09g0559600	193.081	1.5432	0.448486	3.44092	0.00057975	0.0086558
Os03g0198600	76.9714	-1.89407	0.550575	-3.44017	0.000581345	0.00867457
Os11g0229100	69.6916	-2.33609	0.679123	-3.43986	0.000582005	0.00867688
Os03g0815100	1238.7	-1.67678	0.487476	-3.43973	0.000582303	0.00867688
Os05g0490100	237.836	1.48795	0.43259	3.43963	0.000582514	0.00867688
Os09g0376350	190.769	1.67203	0.486217	3.43886	0.000584166	0.00869645
Os04g0648400	31.0347	-2.13173	0.619974	-3.43841	0.000585133	0.0087058
Os01g0882400	46.6025	1.61666	0.47032	3.43735	0.000587432	0.00873494
Os06g0725300	66.2921	1.30153	0.378719	3.43665	0.00058896	0.0087526
Os02g0453000	144.581	-1.12996	0.328817	-3.43645	0.0005894	0.00875407
Os03g0164300	263.5	-1.10244	0.320825	-3.43626	0.000589806	0.00875503
Os01g0159000	28.3593	3.11177	0.906075	3.43434	0.000594003	0.00880207
Os03g0324600	15.41	-3.31569	0.96561	-3.43378	0.00059523	0.00881518
Os01g0966200	1017.18	2.20664	0.643287	3.43026	0.000603001	0.00892512
Os04g0139100	11.1516	-3.85461	1.12433	-3.42836	0.000607248	0.00897245
Os02g0104150	60.0006	1.52093	0.443678	3.428	0.000608052	0.00897401
Os06g0196200	41.1238	2.33045	0.679809	3.42809	0.000607836	0.00897401
Os10g0198300	190.528	2.81594	0.821759	3.42672	0.000610918	0.00900254
Os03g0327800	215.383	-1.44647	0.422123	-3.42667	0.000611037	0.00900254
Os07g0218200	36.7771	-7.34381	2.14395	-3.42536	0.00061399	0.00904087
Os05g0186100	84.5359	1.07355	0.313499	3.42441	0.000616134	0.00906723
Os03g0305600	124.391	3.07601	0.898547	3.42332	0.000618606	0.00909839
Os06g0297800	498.298	-1.24062	0.36243	-3.42306	0.000619202	0.00910166
Os06g0605900	1621.06	-1.70725	0.49894	-3.42175	0.000622201	0.00913036
Os03g0100100	13.7591	3.09808	0.905624	3.42093	0.000624066	0.00915249
Os06g0226950	75.1331	-1.02139	0.298844	-3.41779	0.000631307	0.0092534
Os06g0167500	616.529	-1.29614	0.379696	-3.41362	0.000641068	0.00936441
Os03g0794300	270.728	1.84365	0.540172	3.41308	0.000642324	0.00937742
Os11g0570000	222.714	-1.67538	0.490992	-3.41224	0.000644314	0.00939045
Os06g0694500	1283.71	1.08772	0.31875	3.41245	0.000643819	0.00939045
Os12g0514300	87.5302	1.95738	0.573883	3.41078	0.000647784	0.00943567
Os07g0173100	471.901	1.40505	0.412165	3.40895	0.000652126	0.00949353
Os03g0857100	676.193	2.12867	0.62451	3.40855	0.000653087	0.00950214
Os05g0560200	65.6853	2.66229	0.781279	3.4076	0.000655365	0.00952988
Os02g0649300	64.7292	4.19974	1.23265	3.40708	0.000656616	0.00953727
Os01g0912850	30.7419	-3.29554	0.967481	-3.40632	0.000658461	0.00954641
Os03g0133300	365.905	-1.11097	0.326177	-3.40604	0.00065912	0.00954665
Os04g0196300	323.219	2.15683	0.633311	3.40564	0.000660099	0.00955543
Os06g0231600	137.52	1.25291	0.367979	3.40484	0.000662038	0.00957811
Os04g0662400	22.7553	-4.30877	1.26579	-3.40402	0.000664012	0.00960125
Os01g0246700	783.708	-1.51528	0.445282	-3.40297	0.000666571	0.00962741
Os01g0186600	25.1559	-4.47437	1.31526	-3.40188	0.000669246	0.00966062
Os08g0536200	132.781	2.03367	0.597973	3.40093	0.00067156	0.00968858
Os02g0732600	55.5639	1.33778	0.39356	3.39918	0.000675887	0.00974005
Os01g0627967	87.539	2.26215	0.666467	3.39424	0.000688191	0.00987857
Os10g0504900	19.9952	-4.7896	1.41102	-3.39442	0.00068773	0.00987857
Os08g0421100	19.6167	-2.69145	0.792916	-3.39437	0.000687865	0.00987857
Os08g0170200	4.33216	-5.60764	1.65251	-3.3934	0.000690303	0.00990335
Os11g0587600	442.451	-1.55954	0.459675	-3.3927	0.000692079	0.00991221
Os05g0150500	404.566	1.06333	0.313496	3.39183	0.000694271	0.00993444
Os03g0195450	37.7279	2.10118	0.61956	3.39141	0.000695352	0.00993691
Os11g0665600	80.464	-2.24204	0.661312	-3.3903	0.000698172	0.00997166
Os12g0242800	197.646	1.73213	0.5112	3.38837	0.000703094	0.0100308
Os02g0192700	3449.68	1.85475	0.547545	3.3874	0.000705592	0.0100605
Os05g0223200	4.91825	-5.22914	1.54377	-3.38725	0.00070596	0.0100605
Os03g0811800	388.973	1.113	0.32891	3.38391	0.000714607	0.0101612
Os02g0484200	126.097	3.25032	0.960895	3.3826	0.000718034	0.0101913
Os03g0700700	307.308	-1.52525	0.450946	-3.38234	0.000718723	0.0101915
Os06g0690600	274.534	2.1799	0.644582	3.38188	0.000719912	0.0102027
Os12g0144200	51.654	1.5862	0.469059	3.38167	0.000720462	0.0102049
Os03g0659300	117.198	1.68857	0.499404	3.38117	0.000721787	0.010218
Os04g0557800	57.7687	2.21031	0.653897	3.38021	0.000724309	0.0102481
Os01g0561600	7.77831	-5.59643	1.65575	-3.38	0.000724859	0.0102502
Os01g0974100	36.042	2.59639	0.768247	3.37963	0.000725846	0.0102585
Os11g0610600	299.94	1.51745	0.449093	3.37892	0.00072772	0.0102737
Os04g0601800	1443.89	1.39582	0.413082	3.37905	0.000727369	0.0102737
Os07g0602100	595.49	1.13825	0.336915	3.37845	0.000728945	0.0102797
Os07g0569100	33.6425	1.93686	0.573474	3.37741	0.000731716	0.0103018
Os08g0192100	37.2693	2.93858	0.870058	3.37746	0.000731591	0.0103018
Os11g0628000	30.5392	-1.53916	0.456507	-3.37161	0.0007473	0.010481
Os07g0152900	3849.78	1.20753	0.358334	3.36986	0.00075207	0.0105421
Os04g0641101	28.6386	2.4171	0.71763	3.36817	0.000756701	0.0106012
Os12g0556100	18.8373	1.66429	0.494481	3.36573	0.00076342	0.0106895
Os01g0810800	20.4017	-2.01866	0.599888	-3.36506	0.000765269	0.0107038
Os09g0343400	52.6101	-1.90691	0.566939	-3.36352	0.000769566	0.0107288
Os08g0394000	949.851	1.92773	0.573222	3.36297	0.000771081	0.0107441
Os02g0736200	155.207	-1.07537	0.319958	-3.36097	0.000776698	0.0108165
Os09g0401100	12.049	3.90699	1.16257	3.36063	0.000777638	0.0108237
Os03g0587200	47.2899	-8.07504	2.40341	-3.35983	0.000779899	0.0108376
Os07g0124100	307.691	-1.12331	0.334361	-3.35958	0.000780614	0.0108416
Os09g0431900	96.5346	1.99825	0.594845	3.35927	0.000781484	0.0108478
Os11g0645400	9124.09	1.2856	0.382791	3.35849	0.000783704	0.0108728
Os11g0459600	108.881	-1.35776	0.404324	-3.35809	0.000784831	0.0108819
Os03g0622300	136.41	1.46223	0.435453	3.35796	0.000785208	0.0108819
Os03g0178500	59.6203	1.81461	0.540552	3.35696	0.000788041	0.0109153
Os12g0257450	439.473	2.10811	0.628124	3.3562	0.000790209	0.0109335
Os12g0601400	404.502	-1.10367	0.328833	-3.35632	0.000789866	0.0109335
Os08g0221300	411.644	1.37155	0.408768	3.35534	0.000792675	0.0109617
Os09g0541100	15.9303	-3.85075	1.1479	-3.35459	0.000794821	0.0109855
Os02g0483500	502.993	-1.21498	0.362242	-3.35405	0.000796378	0.0109951
Os06g0107100	754.286	1.48746	0.443583	3.35329	0.000798558	0.0110193
Os02g0816300	6255.25	-1.22317	0.364821	-3.35281	0.00079997	0.0110329
Os01g0123700	24.5117	3.21562	0.960177	3.34899	0.000811074	0.0111561
Os01g0921800	774.594	1.61934	0.483481	3.34933	0.000810082	0.0111561
Os06g0587900	71.6837	-1.58656	0.473729	-3.34909	0.000810769	0.0111561
Os12g0194900	61.7338	1.9757	0.590325	3.3468	0.000817507	0.0112325
Os01g0904500	120.19	-1.07711	0.322001	-3.34507	0.000822622	0.0112907
Os04g0580800	250.362	-1.04548	0.312624	-3.34421	0.000825178	0.0113144
Os01g0931000	91.5177	1.73365	0.518627	3.34277	0.00082946	0.0113482
Os04g0293100	107.295	2.09091	0.625709	3.34166	0.000832801	0.0113878
Os03g0858700	616.13	1.08177	0.323869	3.34016	0.00083731	0.0114373
Os11g0118500	125.574	-1.89195	0.566902	-3.33735	0.000845827	0.0115352
Os08g0387700	77.1244	-1.292	0.387166	-3.33708	0.000846639	0.0115402
Os12g0182500	103.1	1.52931	0.458379	3.33633	0.000848915	0.011561
Os12g0132000	1430.65	2.17603	0.652315	3.33586	0.000850354	0.0115663
Os04g0367900	5.42681	-4.51835	1.35473	-3.33525	0.000852222	0.0115807
Os11g0241200	5.24788	6.27758	1.88322	3.33343	0.000857831	0.011631
Os05g0179100	92.3345	2.12767	0.638234	3.33369	0.000857028	0.011631
Os08g0201600	7.35971	-4.65558	1.3967	-3.33328	0.000858292	0.0116311
Os02g0126300	10.0825	-3.55842	1.06772	-3.33271	0.00086003	0.0116424
Os02g0656600	74.6078	-1.00451	0.301409	-3.33272	0.000860021	0.0116424
Os08g0542000	142.947	-1.55238	0.465901	-3.332	0.00086223	0.011666
Os12g0556200	312.106	-1.74888	0.525042	-3.33093	0.000865564	0.011699
Os12g0566000	153.997	1.40834	0.422827	3.33078	0.000866037	0.011699
Os06g0187500	358.212	1.41557	0.424979	3.33091	0.000865624	0.011699
Os08g0492500	40.3078	2.57632	0.773739	3.32971	0.000869378	0.0117318
Os01g0947700	255.561	-1.16097	0.348962	-3.32694	0.000878062	0.0118205
Os10g0554300	161.092	1.51471	0.455283	3.32696	0.000877993	0.0118205
Os05g0482501	38.5698	1.93972	0.583069	3.32673	0.000878709	0.0118205
Os01g0959750	286.702	1.62521	0.488943	3.32392	0.000887607	0.0119277
Os11g0441500	456.723	1.06761	0.321342	3.32236	0.000892594	0.0119759
Os06g0142200	25.7573	-5.14234	1.54844	-3.32099	0.000896999	0.0120224
Os06g0683100	59.1781	2.19279	0.660438	3.32021	0.000899485	0.0120455
Os07g0129300	345.129	-4.7754	1.4383	-3.32016	0.00089966	0.0120455
Os01g0158100	363.569	1.83378	0.552378	3.31979	0.000900847	0.0120551
Os05g0438800	601.145	1.00634	0.303175	3.31935	0.000902266	0.0120678
Os06g0673700	108.025	-1.67922	0.505997	-3.31863	0.000904588	0.0120926
Os06g0675700	936.801	1.20558	0.363999	3.31205	0.000926141	0.0123678
Os11g0227800	158.302	-1.79248	0.541224	-3.3119	0.000926657	0.0123683
Os02g0249200	138.891	2.02745	0.612369	3.31084	0.000930171	0.0124087
Os11g0209050	13.9604	3.48673	1.05322	3.31054	0.000931149	0.0124153
Os01g0852100	185.916	-1.33423	0.403192	-3.30917	0.000935736	0.0124571
Os09g0511200	24.2821	2.51077	0.758723	3.30921	0.000935604	0.0124571
Os09g0344700	107.067	1.30331	0.39387	3.30898	0.000936373	0.0124591
Os04g0518800	63.2053	1.26483	0.382341	3.30812	0.000939235	0.0124907
Os10g0539500	2609.63	2.15874	0.652614	3.30784	0.000940181	0.0124913
Os08g0523200	20.1381	2.93055	0.885945	3.30782	0.000940255	0.0124913
Os01g0342800	72.4672	1.80668	0.54641	3.30645	0.000944867	0.0125461
Os11g0270500	55.8007	1.63059	0.493312	3.3054	0.00094842	0.0125803
Os02g0768300	132.093	-2.95147	0.893176	-3.30446	0.000951579	0.0126157
Os01g0947000	14.4155	-4.36321	1.32068	-3.30375	0.000954003	0.0126413
Os09g0439800	10.7943	-2.61026	0.790875	-3.30046	0.000965252	0.0127706
Os02g0712800	27.2014	-2.32604	0.705104	-3.29886	0.000970797	0.0128307
Os11g0465200	168.58	1.30355	0.395284	3.29776	0.000974582	0.0128609
Os04g0178400	24.4363	-3.06978	0.931612	-3.29513	0.000983764	0.0129754
Os08g0357300	270.888	-1.10221	0.334604	-3.29407	0.000987479	0.013011
Os06g0663500	101.051	-1.08301	0.328921	-3.2926	0.00099264	0.0130656
Os12g0618400	1149.6	1.0678	0.324491	3.29071	0.000999365	0.0131406
Os01g0127900	75.2009	-1.37876	0.419058	-3.29014	0.00100137	0.0131602
Os12g0434801	72.2703	1.84588	0.561307	3.28853	0.00100713	0.013209
Os05g0536200	234.315	1.55805	0.473784	3.28853	0.00100714	0.013209
Os08g0537900	389.468	-1.1716	0.35624	-3.28879	0.00100619	0.013209
Os01g0772900	3.22477	5.74735	1.74818	3.28761	0.00101041	0.0132384
Os03g0570100	7.06605	-5.66041	1.72236	-3.28642	0.00101469	0.0132865
Os03g0439700	6913.86	1.20762	0.367568	3.28543	0.00101825	0.0133208
Os12g0468600	1000.55	-1.02615	0.312549	-3.28317	0.00102646	0.0134145
Os01g0584300	204.169	1.67626	0.510704	3.28226	0.0010298	0.0134513
Os06g0249350	17.7873	-3.73414	1.13786	-3.28173	0.00103172	0.0134695
Os04g0178300	246.11	-6.67292	2.03402	-3.28065	0.00103566	0.0135073
Os03g0665700	35.6909	1.98085	0.603844	3.28041	0.00103657	0.0135122
Os02g0176700	670.451	-1.55237	0.473266	-3.28012	0.00103764	0.0135169
Os05g0361500	17.177	-2.19624	0.669582	-3.28002	0.00103798	0.0135169
Os05g0382600	2656.6	1.54884	0.472342	3.27906	0.00104155	0.0135565
Os03g0701100	29.2246	1.74945	0.533642	3.27833	0.00104423	0.0135776
Os11g0703100	134.559	1.75151	0.534581	3.27641	0.00105134	0.0136562
Os07g0660400	107.447	1.34322	0.410033	3.27588	0.00105333	0.0136752
Os07g0178600	123.466	1.25968	0.384639	3.27496	0.00105676	0.0137106
Os11g0173500	641.759	-1.30705	0.399161	-3.27449	0.00105854	0.0137219
Os02g0153300	7.68782	2.37118	0.724219	3.27413	0.00105989	0.0137256
Os01g0388000	237.961	-1.15555	0.35311	-3.27248	0.0010661	0.0137991
Os02g0715400	314.283	1.63907	0.500903	3.27223	0.00106704	0.0138044
Os06g0553001	145.033	2.23922	0.684505	3.27129	0.00107057	0.013843
Os02g0231700	6.68052	-4.57865	1.40038	-3.26958	0.00107707	0.0139201
Os01g0930800	1547.4	1.01572	0.310769	3.26842	0.0010815	0.0139703
Os04g0461400	118.479	-1.04275	0.319089	-3.26791	0.00108346	0.0139886
Os10g0520100	5.57476	-4.93157	1.50931	-3.26742	0.00108531	0.0140054
Os03g0673600	1695.41	1.9443	0.595172	3.26679	0.00108773	0.0140296
Os01g0221600	370.822	-1.21577	0.372235	-3.26613	0.00109028	0.0140529
Os11g0130400	18.595	-3.17452	0.972009	-3.26593	0.00109104	0.0140529
Os02g0508100	129.646	1.58994	0.487017	3.26465	0.00109598	0.0140936
Os02g0611500	68.409	1.70285	0.521595	3.2647	0.00109581	0.0140936
Os12g0432600	14.936	-3.45478	1.05873	-3.26313	0.00110188	0.0141389
Os02g0779300	20.964	2.36484	0.724737	3.26303	0.00110226	0.0141389
Os04g0293300	128.737	1.68917	0.517613	3.26338	0.00110091	0.0141389
Os09g0555500	178.58	1.09486	0.335512	3.26325	0.00110143	0.0141389
Os01g0704100	12.5179	-2.32138	0.711589	-3.26224	0.00110535	0.0141573
Os08g0137800	19.1018	-3.94398	1.2093	-3.26137	0.00110877	0.014194
Os03g0668900	103.93	1.29969	0.398565	3.26092	0.00111052	0.0142022
Os01g0962700	2829.69	-1.3461	0.41296	-3.25965	0.00111551	0.0142448
Os02g0208500	1943.97	1.13481	0.348175	3.2593	0.00111689	0.0142554
Os09g0551600	3035.51	1.11993	0.344063	3.25503	0.00113381	0.0144498
Os01g0160100	11.1667	3.19109	0.980457	3.2547	0.00113513	0.0144594
Os06g0181566	1437.53	1.61142	0.495343	3.25315	0.00114135	0.0145314
Os06g0714700	1240.42	1.36964	0.421222	3.25159	0.0011476	0.0145965
Os02g0199600	251.592	1.16254	0.357628	3.25069	0.00115126	0.0146359
Os07g0691800	58.2789	1.73308	0.533517	3.2484	0.00116056	0.0147322
Os03g0355900	268.332	1.01113	0.311392	3.24713	0.00116575	0.0147749
Os05g0473401	11.641	3.39346	1.045	3.24734	0.00116491	0.0147749
Os06g0114500	1137.08	1.05677	0.325458	3.24701	0.00116623	0.0147749
Os02g0103600	25.9334	2.55911	0.78841	3.24591	0.00117077	0.0148252
Os01g0220700	35.994	1.65405	0.509928	3.24369	0.00117992	0.0149042
Os03g0838400	3.98241	-4.90655	1.51273	-3.2435	0.0011807	0.0149068
Os11g0550500	109.498	-1.26753	0.39083	-3.24316	0.00118211	0.0149172
Os03g0807100	40.1345	-2.45754	0.757955	-3.24232	0.00118559	0.014953
Os04g0534600	821.004	1.08505	0.334664	3.2422	0.00118611	0.014953
Os08g0442400	71.5857	-1.59899	0.493236	-3.24182	0.00118768	0.0149654
Os01g0924100	15.3685	2.3049	0.711445	3.23974	0.00119639	0.0150443
Os02g0718600	1315.82	2.17072	0.670011	3.23982	0.00119603	0.0150443
Os05g0582400	49.8608	1.59899	0.493573	3.23963	0.00119686	0.0150443
Os09g0454600	120.029	-1.81302	0.559713	-3.2392	0.00119864	0.0150592
Os01g0215500	126.909	2.52918	0.780843	3.23904	0.00119934	0.0150607
Os02g0320800	89.9387	-1.36876	0.422603	-3.23887	0.00120004	0.0150621
Os01g0933300	95.8271	-1.11894	0.345713	-3.23662	0.00120953	0.015159
Os12g0439201	59.0145	1.84558	0.570281	3.23626	0.00121107	0.015166
Os03g0659200	1565.43	1.27711	0.394675	3.23586	0.00121276	0.0151773
Os05g0534800	337.503	-1.24402	0.384505	-3.23537	0.00121483	0.0151957
Os05g0141300	4.38332	-5.39942	1.66922	-3.23469	0.00121776	0.015224
Os07g0243150	2932.19	1.38154	0.427118	3.23457	0.00121827	0.015224
Os08g0417100	281.789	1.17667	0.363847	3.23397	0.00122083	0.0152485
Os05g0398800	619.188	-1.75285	0.542057	-3.2337	0.001222	0.0152556
Os10g0419400	76.9527	-1.58263	0.489495	-3.23318	0.0012242	0.0152727
Os07g0537900	104.834	-2.3152	0.716092	-3.2331	0.00122455	0.0152727
Os05g0428100	46.4438	-1.91585	0.59263	-3.2328	0.00122585	0.0152815
Os01g0571766	111.966	2.33335	0.721883	3.23231	0.00122792	0.0152925
Os10g0442900	527.101	-1.25297	0.387627	-3.23241	0.00122751	0.0152925
Os03g0140650	14.597	1.91581	0.593608	3.2274	0.0012492	0.0155349
Os09g0439500	1986	1.16109	0.359753	3.22748	0.00124887	0.0155349
Os02g0624300	5.79514	-5.81903	1.80385	-3.22589	0.00125584	0.0156023
Os05g0181300	23.3716	-2.35382	0.729719	-3.22565	0.00125686	0.0156074
Os07g0619200	1460.77	1.1897	0.369358	3.22099	0.00127748	0.0158482
Os04g0659300	2837.1	-3.52504	1.09474	-3.21998	0.00128199	0.0158965
Os11g0251400	7154.25	-1.14412	0.355715	-3.2164	0.00129811	0.0160886
Os09g0567800	426.116	-1.11923	0.347991	-3.21625	0.00129877	0.016089
Os07g0691700	292.336	-1.81483	0.564512	-3.21486	0.00130507	0.0161592
Os01g0198900	2402.79	1.26356	0.39328	3.21288	0.00131412	0.016257
Os10g0105900	13.8991	2.64351	0.822829	3.21271	0.00131487	0.016257
Os10g0562900	52.4892	-2.67155	0.831553	-3.21272	0.00131483	0.016257
Os06g0671600	30.6811	-3.29625	1.02644	-3.21133	0.00132123	0.0163278
Os04g0340100	3.47284	-5.39068	1.67877	-3.21109	0.00132235	0.0163338
Os04g0655100	216.067	1.82433	0.568196	3.21074	0.00132393	0.0163455
Os06g0649700	64.8881	-1.6717	0.520984	-3.20873	0.0013332	0.0164441
Os04g0562100	177.56	1.18154	0.368381	3.20739	0.00133946	0.0165133
Os12g0274700	28340.9	1.58633	0.494944	3.20507	0.00135031	0.0166231
Os10g0560700	163.765	1.26787	0.395621	3.20476	0.00135175	0.016633
Os10g0111300	64.3276	1.09197	0.340894	3.20325	0.00135886	0.0166805
Os11g0549300	5.29141	-5.58453	1.7448	-3.20068	0.00137106	0.0168068
Os07g0648100	80.3177	1.02435	0.320039	3.20069	0.00137101	0.0168068
Os07g0469200	559.861	1.652	0.516219	3.20019	0.00137336	0.0168263
Os01g0612800	122.562	1.03512	0.323474	3.20002	0.00137416	0.016828
Os02g0744682	89.048	-1.30865	0.409011	-3.19956	0.00137638	0.0168392
Os06g0232300	13.4853	-2.19849	0.687097	-3.19967	0.00137583	0.0168392
Os01g0721200	3.91102	-5.68595	1.77722	-3.19935	0.00137739	0.0168435
Os11g0149300	37.5462	1.24838	0.390226	3.19913	0.00137842	0.0168463
Os02g0228600	81.0598	-1.31722	0.411756	-3.19903	0.00137893	0.0168463
Os11g0146950	135.963	-1.11638	0.349199	-3.19697	0.0013888	0.0169508
Os01g0156300	27.0355	1.92451	0.602433	3.19456	0.00140042	0.0170683
Os08g0526400	521.592	-1.15033	0.360165	-3.19388	0.00140374	0.0170844
Os01g0616900	55.2911	-1.2307	0.38553	-3.19222	0.00141182	0.0171746
Os12g0601300	900.033	-1.33746	0.419284	-3.18987	0.00142339	0.0172908
Os01g0629750	880.149	1.76706	0.55405	3.18936	0.0014259	0.0173048
Os08g0187900	70.2043	2.27945	0.714924	3.18839	0.0014307	0.0173467
Os04g0601400	915.394	1.58734	0.497908	3.18802	0.00143252	0.0173606
Os07g0628400	3.20813	5.19147	1.6286	3.18768	0.00143417	0.0173724
Os07g0217600	443.699	-1.36256	0.42747	-3.18749	0.00143511	0.0173756
Os05g0493166	70.0458	1.56497	0.491993	3.18088	0.00146829	0.0177355
Os09g0459450	106.782	-1.10687	0.348166	-3.17915	0.00147706	0.0178246
Os03g0398250	70.6732	2.3181	0.729435	3.17794	0.00148326	0.0178827
Os02g0211000	94.5166	-1.12895	0.355461	-3.17601	0.00149318	0.0179938
Os07g0490100	238.62	1.15007	0.362142	3.17575	0.00149451	0.0180014
Os10g0134500	23.5712	-2.11116	0.664843	-3.17543	0.00149616	0.0180091
Os10g0444100	5.12795	-5.26012	1.65655	-3.17535	0.00149655	0.0180091
Os03g0162200	171.849	-3.10261	0.977473	-3.17411	0.00150295	0.0180678
Os02g0245800	59.3872	1.38287	0.435856	3.17278	0.00150988	0.0181274
Os05g0467400	87.99	1.10751	0.349068	3.17277	0.00150991	0.0181274
Os12g0119800	193.648	-1.11974	0.352978	-3.17227	0.0015125	0.01815
Os03g0755700	80.1092	-1.27292	0.401454	-3.17079	0.00152027	0.0182262
Os07g0641700	632.927	1.39278	0.439279	3.17061	0.00152121	0.018229
Os07g0255300	497.392	1.48841	0.469535	3.16996	0.00152458	0.0182526
Os01g0597800	83.7206	-1.64044	0.517637	-3.16909	0.00152915	0.0182985
Os08g0507701	25.1068	-2.16717	0.684016	-3.1683	0.00153332	0.0183398
Os08g0484100	84.6225	-1.20295	0.379712	-3.16806	0.0015346	0.0183467
Os11g0225000	89.2875	-1.98933	0.628159	-3.16692	0.00154063	0.0184102
Os07g0541000	11.1844	-3.04181	0.960689	-3.16628	0.001544	0.0184332
Os10g0469600	193.633	-1.10539	0.349147	-3.16596	0.00154573	0.0184454
Os02g0526400	2096.07	-1.47684	0.46666	-3.1647	0.00155242	0.018508
Os10g0577600	546.199	-1.13465	0.35863	-3.16383	0.00155707	0.0185462
Os05g0214300	8.06437	6.21709	1.96588	3.16249	0.00156425	0.0186145
Os12g0473900	11.1973	-4.03095	1.27472	-3.16223	0.00156564	0.0186223
Os11g0212900	13.6737	-2.28031	0.721435	-3.16081	0.00157333	0.0187052
Os12g0636400	60.281	-1.33414	0.422162	-3.16026	0.00157626	0.0187226
Os12g0189300	29722.5	1.1989	0.379499	3.15916	0.00158227	0.0187854
Os12g0128600	99.8078	1.46218	0.462984	3.15816	0.00158768	0.0188408
Os10g0395000	130.023	-1.25688	0.39806	-3.15751	0.00159122	0.0188621
Os08g0163300	12.0624	2.91478	0.923345	3.15676	0.0015953	0.0188877
Os11g0242800	115507	1.03361	0.327505	3.15601	0.00159941	0.0189188
Os08g0526633	75.7304	-1.45735	0.461789	-3.15588	0.00160016	0.018919
Os06g0104100	105.609	1.12367	0.356421	3.15265	0.00161794	0.0191081
Os06g0233000	348.443	1.32622	0.420992	3.15024	0.00163139	0.0192351
Os06g0264800	29641.2	1.40191	0.445009	3.1503	0.00163104	0.0192351
Os08g0119800	315.823	1.88333	0.5981	3.14886	0.00163909	0.0193053
Os01g0699100	76.418	-1.4511	0.460928	-3.14822	0.00164271	0.0193065
Os01g0372700	82.9566	1.37927	0.438474	3.14561	0.0016574	0.0194614
Os11g0118300	211.49	-1.47464	0.468871	-3.1451	0.0016603	0.0194789
Os11g0490900	148.472	-1.42809	0.454323	-3.14334	0.00167034	0.0195865
Os10g0132300	149.443	-1.15572	0.367864	-3.1417	0.00167968	0.019678
Os10g0578800	2815.91	-1.185	0.377398	-3.13992	0.00168993	0.01978
Os03g0139500	7.12124	4.63635	1.47716	3.13869	0.00169707	0.0198546
Os11g0684700	229.589	-1.14826	0.365926	-3.13795	0.00170134	0.0198864
Os10g0208500	788.23	-1.2159	0.387716	-3.13606	0.00171236	0.019997
Os06g0313440	11.6081	-2.69119	0.85812	-3.13614	0.00171186	0.019997
Os08g0504000	36.2242	-2.73363	0.872044	-3.13473	0.0017201	0.0200782
Os02g0465000	509.167	1.07535	0.343211	3.13322	0.001729	0.020131
Os03g0672300	56.5798	-1.78448	0.569527	-3.13326	0.00172874	0.020131
Os09g0287000	1861.78	-1.21095	0.386461	-3.13343	0.00172775	0.020131
Os09g0322300	10.5205	-2.62437	0.837682	-3.1329	0.00173089	0.020131
Os09g0513900	72.9937	1.30887	0.417946	3.13167	0.00173813	0.0201969
Os04g0438600	322.521	-1.14628	0.366211	-3.1301	0.00174746	0.0202938
Os02g0804400	520.442	1.52892	0.488614	3.12909	0.00175349	0.0203478
Os10g0505700	2066.25	1.77394	0.5672	3.12754	0.00176274	0.0204274
Os04g0607566	8.35163	-3.13365	1.00266	-3.12535	0.00177595	0.0205527
Os07g0585900	35.1285	-1.65758	0.530362	-3.12537	0.00177582	0.0205527
Os03g0266900	49.5351	1.40262	0.448846	3.12494	0.00177842	0.020572
Os01g0286500	15.6481	2.24922	0.720137	3.12333	0.00178819	0.0206664
Os11g0546600	13.1409	-2.5973	0.831618	-3.12318	0.00178906	0.0206672
Os10g0579900	53.3829	-1.06484	0.340982	-3.12285	0.0017911	0.0206768
Os01g0185900	21.4474	-1.85054	0.59278	-3.12179	0.00179753	0.020737
Os01g0862200	1358.04	1.092	0.349824	3.12156	0.00179894	0.0207439
Os11g0115400	2682.93	1.89521	0.607274	3.12085	0.00180333	0.0207666
Os03g0170701	191.008	-2.20703	0.707162	-3.12096	0.00180262	0.0207666
Os08g0269500	434.378	1.48178	0.475324	3.11742	0.00182441	0.020953
Os01g0916700	138.745	1.21253	0.389126	3.11603	0.00183303	0.0210237
Os02g0503900	209.034	1.65507	0.531105	3.11628	0.0018315	0.0210237
Os04g0679400	1662.71	-1.39745	0.448662	-3.11471	0.00184124	0.0211085
Os10g0457200	167.729	-1.30442	0.419016	-3.11306	0.0018516	0.0212022
Os12g0495525	38.3302	-2.23267	0.71716	-3.11321	0.00185062	0.0212022
Os12g0592300	4.17744	-5.52982	1.77636	-3.11301	0.00185189	0.0212022
Os10g0522700	478.401	1.34387	0.431799	3.11225	0.00185665	0.0212378
Os12g0553800	26.0719	2.67388	0.859397	3.11135	0.00186237	0.0212937
Os01g0601700	27.0384	-1.55524	0.499889	-3.11117	0.0018635	0.0212971
Os08g0138200	4.55802	-4.98065	1.601	-3.11096	0.00186482	0.0213027
Os10g0169200	5.54562	-6.34356	2.04091	-3.1082	0.00188231	0.0214705
Os10g0553600	252.382	1.22816	0.395146	3.10811	0.00188285	0.0214705
Os02g0759700	49.9586	1.71348	0.551359	3.10774	0.00188523	0.0214881
Os01g0597600	154.641	-5.74614	1.84969	-3.10654	0.00189289	0.0215593
Os03g0117050	5.9033	4.0335	1.29845	3.10639	0.00189386	0.0215593
Os09g0403300	15.1602	3.78988	1.22004	3.10637	0.001894	0.0215593
Os01g0866600	846.003	1.18858	0.382683	3.1059	0.00189701	0.0215839
Os11g0644500	104.535	1.54816	0.498479	3.10577	0.00189784	0.0215839
Os02g0206100	1809.1	1.05414	0.339654	3.10359	0.00191191	0.0217162
Os06g0226500	36.9126	-2.42601	0.781685	-3.10357	0.00191201	0.0217162
Os02g0788133	22.2316	2.62303	0.845315	3.10302	0.00191557	0.021747
Os01g0620301	105.828	1.71372	0.552522	3.10163	0.00192461	0.0217864
Os10g0100500	120.642	-1.28617	0.414644	-3.10186	0.00192308	0.0217864
Os07g0489200	159.697	1.05149	0.338981	3.1019	0.00192283	0.0217864
Os12g0478900	28.0773	2.08393	0.672039	3.1009	0.00192935	0.0218167
Os04g0403900	3685.68	1.47145	0.474855	3.09873	0.00194354	0.0219482
Os01g0524400	10.6336	5.52009	1.78175	3.09813	0.00194744	0.0219825
Os02g0650900	27.8064	-1.71169	0.552886	-3.09591	0.0019621	0.0221285
Os04g0127500	6.43565	-4.47985	1.44731	-3.09529	0.00196619	0.0221649
Os06g0679500	187.769	-1.21022	0.391044	-3.09485	0.00196912	0.0221785
Os07g0541800	7.32397	-4.17786	1.35015	-3.09436	0.00197239	0.022199
Os08g0557600	917.077	1.22354	0.395414	3.09432	0.00197267	0.022199
Os04g0638700	294.424	1.17426	0.379605	3.09336	0.00197905	0.0222513
Os02g0202900	402.963	1.48391	0.479801	3.09277	0.001983	0.0222762
Os06g0114000	946.574	1.58447	0.512305	3.09283	0.00198256	0.0222762
Os12g0547100	1156.63	1.27544	0.412447	3.09237	0.00198566	0.0222791
Os02g0725600	129.737	1.16479	0.376671	3.09234	0.00198586	0.0222791
Os07g0580200	6.05909	-5.09191	1.64695	-3.09173	0.00198996	0.0223154
Os02g0174300	99.5361	1.22	0.394776	3.09035	0.00199919	0.0223993
Os04g0291900	4.66091	-6.54637	2.11914	-3.08917	0.0020072	0.0224596
Os09g0322500	172.563	-1.85897	0.60195	-3.08825	0.00201339	0.0225191
Os11g0136400	12.2445	3.05927	0.991126	3.08666	0.00202421	0.0226204
Os07g0148900	51612.1	1.55908	0.505125	3.08652	0.00202514	0.022621
Os05g0549900	51.2969	-1.47157	0.476914	-3.08561	0.00203138	0.0226808
Os12g0516200	1967.2	1.09035	0.353388	3.08541	0.00203272	0.0226859
Os12g0438300	161.471	1.20283	0.389912	3.08487	0.00203639	0.022717
Os08g0235550	605.729	1.50563	0.488113	3.08459	0.00203834	0.022719
Os09g0420700	178.136	1.23694	0.401354	3.08191	0.00205674	0.0228942
Os10g0191300	10.4897	-3.66297	1.18891	-3.08096	0.00206337	0.0229482
Os02g0217900	7.5268	3.39637	1.10236	3.081	0.00206305	0.0229482
Os06g0164500	612.241	1.28909	0.418488	3.08037	0.00206746	0.0229837
Os03g0332600	151.746	1.279	0.415263	3.07997	0.00207018	0.023004
Os07g0122200	144.503	-1.44446	0.469244	-3.07827	0.00208206	0.0231159
Os05g0583400	58.1663	1.96671	0.639069	3.07747	0.00208769	0.0231685
Os07g0536300	36.6547	-3.19399	1.03869	-3.07501	0.00210497	0.02333
Os08g0200300	78583.3	1.1366	0.369623	3.07503	0.00210481	0.02333
Os02g0448000	18.1866	-2.08806	0.679244	-3.07409	0.00211143	0.0233915
Os02g0184200	71.4802	1.69861	0.552862	3.0724	0.00212345	0.0235054
Os02g0742700	80.2012	-2.27498	0.74079	-3.07102	0.00213326	0.0235887
Os06g0716700	3404.21	-1.15141	0.375009	-3.07035	0.00213811	0.023626
Os05g0586050	495.649	1.25339	0.408268	3.07003	0.00214037	0.0236407
Os03g0161950	10.6737	-2.06463	0.672592	-3.06965	0.00214306	0.0236603
Os01g0800900	77.7585	2.30323	0.750466	3.06907	0.00214728	0.0236763
Os03g0278900	23555.3	1.36607	0.445075	3.0693	0.0021456	0.0236763
Os06g0550901	34.3778	2.00286	0.652795	3.06813	0.00215399	0.0237402
Os02g0478600	182.554	1.70031	0.554251	3.06776	0.00215669	0.0237581
Os05g0500600	184.711	1.64839	0.53737	3.06752	0.00215839	0.0237581
Os06g0528700	438.112	1.11904	0.364786	3.06765	0.0021575	0.0237581
Os04g0598900	16.8685	3.22056	1.05084	3.06474	0.00217861	0.0239498
Os01g0849000	317.397	1.36402	0.445173	3.06403	0.00218376	0.023987
Os08g0425100	35.3765	1.60959	0.525321	3.06402	0.00218386	0.023987
Os07g0562700	101013	1.20576	0.393555	3.06375	0.00218578	0.0239978
Os06g0481200	23.8323	-2.35344	0.768227	-3.06347	0.00218783	0.0239998
Os06g0699050	324.343	1.46196	0.477209	3.06356	0.00218722	0.0239998
Os02g0575900	68.3588	-1.27124	0.415009	-3.06316	0.00219009	0.0240144
Os04g0500200	92.0267	2.12556	0.694191	3.06193	0.00219918	0.0241037
Os11g0594000	24.1472	-3.25794	1.06429	-3.06113	0.00220502	0.0241367
Os02g0553600	250.392	1.22981	0.401773	3.06097	0.00220624	0.0241398
Os06g0146400	92.6859	1.62531	0.531156	3.05996	0.00221369	0.0242111
Os01g0840100	963.383	1.00825	0.329602	3.05899	0.00222084	0.0242686
Os09g0442100	251.111	-1.48272	0.484742	-3.05878	0.00222238	0.0242751
Os01g0153800	16.3211	-2.1388	0.699466	-3.05777	0.00222994	0.0243216
Os10g0419600	748.613	1.38184	0.451922	3.0577	0.00223043	0.0243216
Os11g0454000	39.3161	3.87855	1.26844	3.05772	0.00223026	0.0243216
Os02g0498600	216.356	1.88965	0.618186	3.05677	0.00223733	0.0243865
Os01g0332100	624.835	1.55414	0.508468	3.05651	0.00223927	0.0243974
Os11g0699532	71.412	1.36853	0.447873	3.05563	0.00224592	0.0244386
Os02g0258800	379.205	1.89451	0.620056	3.05538	0.00224776	0.0244483
Os01g0812800	119.753	1.53169	0.501408	3.05477	0.00225231	0.0244668
Os10g0160600	202.492	1.15063	0.376645	3.05496	0.00225091	0.0244668
Os06g0687600	773.755	1.05254	0.344552	3.05481	0.00225204	0.0244668
Os01g0215750	3.61084	-5.62474	1.8414	-3.05459	0.00225365	0.0244709
Os12g0217800	34.7143	-3.2122	1.05197	-3.0535	0.00226189	0.0245397
Os06g0132300	445.421	1.52773	0.500307	3.05358	0.00226128	0.0245397
Os05g0424300	233.39	1.82851	0.598898	3.05312	0.00226474	0.0245602
Os08g0101100	83.6396	-3.07674	1.00779	-3.05295	0.00226602	0.0245637
Os01g0765400	33.366	1.92211	0.629806	3.0519	0.00227396	0.0246393
Os06g0315300	4.00898	5.03389	1.64995	3.05094	0.00228124	0.0246974
Os11g0474100	2149.96	1.47893	0.484803	3.05058	0.00228396	0.0247061
Os03g0265800	495.612	1.00872	0.330652	3.05071	0.00228302	0.0247061
Os08g0367400	153.441	1.38341	0.45358	3.04997	0.00228863	0.0247461
Os05g0155100	226.03	1.82246	0.597647	3.0494	0.002293	0.0247725
Os10g0539900	250.323	1.36834	0.448872	3.0484	0.00230062	0.0248235
Os07g0142802	50.5283	1.46077	0.479182	3.04847	0.00230012	0.0248235
Os03g0825400	199.896	1.43857	0.471945	3.04818	0.00230232	0.0248314
Os01g0318202	38.6019	-1.80677	0.592821	-3.04775	0.00230565	0.0248568
Os05g0190000	869.252	1.5656	0.513874	3.04667	0.00231392	0.0249356
Os10g0198100	45.4469	1.08724	0.356929	3.04609	0.00231836	0.0249625
Os08g0239000	141.194	1.1965	0.392843	3.04575	0.00232104	0.0249809
Os04g0354600	1871.95	-1.32281	0.434422	-3.04498	0.00232692	0.0250232
Os01g0207400	1413.21	1.31039	0.430376	3.04475	0.00232872	0.025032
Os11g0485500	1908.24	2.02576	0.665498	3.04397	0.00233478	0.0250867
Os05g0144200	141.434	1.41831	0.465967	3.0438	0.00233607	0.02509
Os02g0207100	39.6886	1.77716	0.584115	3.04249	0.00234629	0.0251683
Os02g0126400	1113.3	-1.70325	0.560118	-3.04088	0.00235887	0.0252609
Os08g0267300	11.6747	-2.85807	0.940696	-3.03826	0.00237952	0.0254397
Os12g0405300	75.6848	-1.23835	0.407623	-3.03799	0.00238162	0.0254516
Os10g0579200	76.5792	1.38182	0.45496	3.03723	0.00238765	0.0255011
Os08g0463100	46.9983	1.35898	0.44745	3.03715	0.00238824	0.0255011
Os12g0626200	51.5317	2.61393	0.861092	3.0356	0.0024006	0.0256224
Os02g0784900	499.625	1.0199	0.336258	3.03309	0.00242065	0.0257828
Os01g0570601	5.63037	-3.04436	1.00391	-3.03249	0.00242542	0.0258122
Os11g0562100	1170.4	-1.00064	0.330056	-3.03172	0.00243167	0.0258573
Os03g0167600	10.6737	2.7835	0.918785	3.02954	0.00244927	0.0260336
Os04g0692800	37.964	-2.20108	0.726885	-3.0281	0.00246096	0.026147
Os01g0167800	63.1769	-1.39259	0.460015	-3.02727	0.00246774	0.0261974
Os01g0183850	20.8801	4.07314	1.34564	3.02692	0.0024706	0.0262061
Os02g0572400	490.269	-1.60397	0.529936	-3.02671	0.00247228	0.0262131
Os05g0485300	148.336	-1.37781	0.455261	-3.02642	0.00247465	0.0262274
Os12g0155100	178.833	1.43473	0.474438	3.02407	0.002494	0.0264107
Os01g0973100	8.1519	5.23939	1.73266	3.02391	0.00249533	0.0264139
Os08g0297800	12.318	3.09574	1.02394	3.02336	0.00249982	0.0264396
Os05g0107900	39.8553	1.19986	0.396948	3.02272	0.00250518	0.0264745
Os05g0473300	4.5855	5.33836	1.76681	3.02147	0.00251555	0.026555
Os09g0115400	384.56	1.46137	0.483671	3.02142	0.0025159	0.026555
Os11g0558400	67.4122	-1.52849	0.506045	-3.02046	0.00252391	0.0266286
Os02g0673000	71.0646	1.28002	0.423893	3.01969	0.00253034	0.0266746
Os05g0565000	115.523	1.48905	0.49321	3.0191	0.00253524	0.0267152
Os12g0575000	11140.9	1.07128	0.355176	3.0162	0.00255963	0.026939
Os06g0536850	166.2	1.29528	0.429601	3.01507	0.0025692	0.0270287
Os05g0576600	172.89	-1.73086	0.574134	-3.01474	0.00257202	0.0270473
Os01g0681600	518.115	-1.02873	0.341262	-3.01449	0.00257408	0.0270579
Os06g0685300	53.6101	1.65455	0.54909	3.01327	0.00258451	0.0271564
Os12g0637000	10.1287	-4.17339	1.38507	-3.01312	0.00258578	0.0271586
Os07g0575900	353.552	-1.12607	0.37401	-3.01081	0.00260551	0.0273323
Os07g0642200	98.2818	1.83625	0.609874	3.01087	0.00260499	0.0273323
Os01g0585200	9.55327	-3.62427	1.20442	-3.00915	0.00261983	0.0274713
Os01g0384800	391.19	-1.65284	0.549328	-3.00885	0.00262242	0.0274873
Os04g0319700	24.5478	2.67394	0.889011	3.00777	0.00263171	0.0275733
Os04g0226340	388.453	-1.46247	0.486565	-3.00571	0.00264964	0.0277499
Os03g0175200	200.456	1.4397	0.479055	3.00529	0.00265329	0.0277738
Os03g0565900	9.67682	-2.63805	0.878553	-3.00272	0.00267575	0.027955
Os07g0471200	22.2729	-2.69737	0.898462	-3.00221	0.00268029	0.0279796
Os01g0578500	49.8289	1.00047	0.333286	3.00183	0.00268365	0.0280033
Os03g0764000	521.5	-1.2653	0.421591	-3.00126	0.00268866	0.0280442
Os03g0411800	534.057	-1.19255	0.397495	-3.00016	0.00269842	0.0281231
Os02g0149900	23.2316	2.05037	0.683496	2.99983	0.00270128	0.0281415
Os11g0107000	664.411	-1.24634	0.415581	-2.99902	0.00270846	0.0281706
Os11g0133100	12.7936	-2.55552	0.85207	-2.99919	0.002707	0.0281706
Os05g0154800	16.8422	2.1581	0.719584	2.9991	0.00270778	0.0281706
Os07g0614300	10.3938	2.78142	0.927497	2.99884	0.00271006	0.0281759
Os01g0935000	28.267	2.87139	0.95754	2.99871	0.00271126	0.0281769
Os08g0476700	650.358	1.241	0.413982	2.99773	0.00271999	0.0282296
Os05g0141000	72.9563	-1.92162	0.641072	-2.99751	0.00272194	0.0282308
Os07g0621400	51.7609	1.29312	0.431452	2.99714	0.00272525	0.0282423
Os03g0228400	350.657	1.10319	0.368097	2.99701	0.00272646	0.0282434
Os01g0883800	169.238	1.54393	0.515218	2.99666	0.00272958	0.0282643
Os01g0644900	4.11669	-6.36061	2.1227	-2.99648	0.00273118	0.0282665
Os04g0578300	20.9055	2.23087	0.744549	2.99627	0.00273309	0.0282665
Os09g0333500	35.2161	1.2872	0.429589	2.99634	0.00273238	0.0282665
Os05g0522600	1047.44	-1.19794	0.399892	-2.99565	0.00273861	0.0283122
Os04g0267250	80.0572	1.72836	0.577037	2.99523	0.00274235	0.0283394
Os01g0840900	60.1313	-1.49529	0.499601	-2.99297	0.00276273	0.0285156
Os01g0764500	399.821	1.09747	0.366835	2.99173	0.00277405	0.0286095
Os10g0490100	61.6113	-2.20158	0.736134	-2.99074	0.00278305	0.0286907
Os01g0757900	62.4888	-1.36816	0.457651	-2.98952	0.00279414	0.028782
Os01g0818300	145.956	1.02484	0.342842	2.98924	0.00279676	0.0287859
Os05g0517600	5.20689	5.70515	1.90854	2.98927	0.00279642	0.0287859
Os11g0305300	330.507	-1.77724	0.594593	-2.989	0.00279896	0.028797
Os02g0769100	335.652	1.44881	0.484768	2.98868	0.00280188	0.0288155
Os03g0343900	23969.9	1.37054	0.458734	2.98765	0.00281128	0.0288891
Os01g0884800	31.8387	1.69783	0.568535	2.98632	0.00282361	0.0289926
Os06g0304600	862.903	1.02034	0.341826	2.98497	0.00283609	0.0290857
Os09g0557500	43.9928	1.86998	0.626466	2.98497	0.00283608	0.0290857
Os01g0757200	147.199	-1.25271	0.419741	-2.98448	0.00284062	0.0290974
Os04g0581000	9.41798	-3.58611	1.20172	-2.98414	0.00284377	0.0291181
Os12g0260500	11.7377	-3.93372	1.31884	-2.98271	0.00285706	0.0292308
Os05g0577500	13.434	-3.7937	1.2726	-2.98106	0.00287255	0.0293776
Os07g0688200	14.3284	-2.05771	0.690394	-2.98049	0.00287787	0.0294101
Os12g0562600	271.888	1.28673	0.431928	2.97904	0.00289153	0.0295363
Os11g0249900	63.4561	1.52712	0.512863	2.97764	0.0029048	0.0296483
Os04g0594400	93.7917	-1.1975	0.402208	-2.97732	0.00290781	0.0296673
Os01g0648000	29.8323	-1.4868	0.499583	-2.97608	0.00291955	0.0297516
Os05g0214900	257.891	1.15481	0.388181	2.97493	0.00293057	0.0298284
Os01g0562600	52.7889	-1.65649	0.557231	-2.97271	0.00295185	0.030012
Os08g0151400	370.085	1.02234	0.343912	2.97268	0.00295212	0.030012
Os04g0411800	121.469	1.16684	0.392579	2.97224	0.00295639	0.0300436
Os10g0555100	279.848	-1.6379	0.551306	-2.97094	0.00296893	0.0301352
Os02g0809300	26.1303	-2.67234	0.899848	-2.96976	0.00298028	0.0302146
Os01g0537250	91.9992	-1.83782	0.618924	-2.96938	0.002984	0.0302284
Os01g0784700	26.4611	1.88837	0.636059	2.96887	0.00298898	0.0302598
Os02g0584800	265.135	-1.70531	0.57445	-2.9686	0.00299155	0.0302598
Os03g0328900	487.093	-1.13933	0.3838	-2.96856	0.00299195	0.0302598
Os04g0403600	76.112	1.79399	0.60435	2.96846	0.00299298	0.0302598
gene-cob	3.47818	5.02008	1.69111	2.96852	0.00299241	0.0302598
Os07g0691200	7714.4	1.00907	0.33995	2.96827	0.00299476	0.0302659
Os11g0302800	14.921	2.76838	0.932716	2.96808	0.00299664	0.0302729
Os04g0359100	187.488	1.21052	0.407903	2.96767	0.00300065	0.0303015
Os09g0403967	855.727	1.80471	0.608608	2.9653	0.00302385	0.0305118
Os01g0116400	19.1038	3.20404	1.0808	2.9645	0.00303178	0.0305798
Os02g0768950	129.449	1.0253	0.346061	2.96278	0.00304876	0.0307269
Os02g0288000	49.9223	-1.49352	0.504231	-2.96197	0.00305675	0.0307954
Os03g0785100	1140.92	2.03159	0.686075	2.96118	0.00306464	0.030849
Os03g0775650	36.2916	1.63542	0.55241	2.96052	0.00307121	0.0308926
Os03g0438900	3.25729	4.3493	1.46921	2.9603	0.0030734	0.0309025
Os10g0576900	775.864	-1.14678	0.387454	-2.95979	0.00307848	0.0309231
Os02g0618250	71.625	1.81016	0.611597	2.95973	0.00307906	0.0309231
Os12g0133300	28.0424	2.40257	0.812056	2.95863	0.00309013	0.0310221
Os03g0310666	56.9198	1.96986	0.665968	2.9579	0.00309747	0.0310837
Os10g0537800	61.1392	-3.2293	1.092	-2.95724	0.00310402	0.0311251
Os05g0192700	1363.16	1.91252	0.64678	2.95698	0.00310669	0.0311397
Os04g0659200	3.53045	-5.56613	1.88304	-2.95592	0.00311736	0.0312345
Os04g0550200	137.947	1.53535	0.519517	2.95533	0.00312333	0.031282
Os12g0117900	48.5641	2.00922	0.680226	2.95375	0.00313939	0.0313725
Os07g0599600	200.519	1.13812	0.385327	2.95365	0.00314039	0.0313725
Os05g0151300	3926.9	1.04716	0.354648	2.95267	0.00315035	0.0314545
Os01g0830300	74.0885	1.28899	0.436584	2.95245	0.00315267	0.031456
Os02g0193425	43.4757	2.19917	0.745185	2.95117	0.00316574	0.0315469
Os06g0248600	3.31726	-5.98568	2.02823	-2.95118	0.00316563	0.0315469
Os11g0558900	32.3747	-3.85272	1.30628	-2.94938	0.00318415	0.0316934
Os01g0650200	1370.82	-1.02204	0.346657	-2.94826	0.00319564	0.0317955
Os01g0317800	1121.72	1.35207	0.458863	2.94656	0.00321327	0.0319585
Os01g0905500	58.0064	1.77506	0.602524	2.94605	0.00321865	0.0319872
Os03g0307333	40.9304	2.41214	0.818808	2.94592	0.00322	0.0319883
Os03g0284400	5140.27	1.5139	0.514003	2.94532	0.00322622	0.0320034
Os03g0389400	54.3232	1.19332	0.405161	2.94529	0.00322652	0.0320034
Os06g0131500	34.6543	-2.32655	0.789894	-2.9454	0.00322539	0.0320034
Os06g0727400	17.1068	-1.8707	0.635603	-2.94319	0.0032485	0.0321718
Os12g0130300	16.473	-2.85294	0.969532	-2.94259	0.00325476	0.032209
Os03g0257500	14.1272	-3.16934	1.0772	-2.94219	0.00325899	0.0322384
Os01g0679700	2313.58	1.4697	0.499646	2.94148	0.00326653	0.0322881
Os08g0518900	6.58221	-5.11119	1.73762	-2.94148	0.00326649	0.0322881
Os03g0204900	18.1123	2.06324	0.701767	2.94007	0.00328143	0.0323798
Os02g0760000	166.154	1.14001	0.388097	2.93744	0.00330938	0.0325737
Os08g0430500	1314.49	1.3628	0.46412	2.93631	0.00332145	0.0326675
Os01g0873100	50.903	1.53239	0.52194	2.93594	0.00332535	0.0326883
Os11g0260100	35.3418	-1.68122	0.572838	-2.93489	0.00333663	0.0327666
Os03g0797500	17.8855	-5.04424	1.71938	-2.93376	0.00334884	0.0328739
Os01g0224700	23.2203	-2.90094	0.989225	-2.93253	0.00336208	0.0329409
Os01g0919900	880.422	1.0121	0.345253	2.93148	0.00337346	0.0330193
Os12g0417450	1211.97	1.77551	0.60568	2.93144	0.00337393	0.0330193
Os04g0630500	61.8109	1.38752	0.473408	2.93093	0.00337952	0.0330488
Os02g0314600	144.511	-1.6942	0.578143	-2.93042	0.00338508	0.0330654
Os01g0505700	55.539	1.93565	0.660842	2.92907	0.00339981	0.0331718
Os12g0225100	208.822	1.17512	0.401195	2.92905	0.00339996	0.0331718
Os07g0410300	4.15303	-5.60323	1.91305	-2.92895	0.00340114	0.0331718
Os02g0103800	549.644	1.32066	0.450981	2.92841	0.00340696	0.0331907
Os08g0124500	7.60884	-2.72525	0.930695	-2.92819	0.00340945	0.0332024
Os04g0542200	277.807	1.30244	0.44486	2.92776	0.00341416	0.0332356
Os01g0912600	48.9258	1.0684	0.364999	2.92713	0.00342102	0.0332898
Os08g0557100	1385.84	1.09554	0.374358	2.92644	0.00342863	0.0333513
Os08g0457300	9.05114	-3.49796	1.19545	-2.92607	0.0034327	0.0333781
Os02g0578400	65.868	1.47657	0.504751	2.92534	0.0034408	0.0334316
Os07g0232800	373.409	-1.23299	0.421793	-2.92322	0.00346427	0.0336289
Os01g0589800	816.448	1.29455	0.442888	2.92297	0.00346712	0.0336344
Os10g0340800	1749.3	1.82546	0.624544	2.92287	0.00346822	0.0336344
Os03g0281500	15.2191	2.06653	0.707273	2.92182	0.00347989	0.0337221
Os08g0544600	34.6616	1.87418	0.641536	2.9214	0.00348459	0.0337549
Os11g0644800	1149.07	1.14986	0.393691	2.92072	0.00349228	0.0338167
Os05g0119200	455.478	1.45386	0.497818	2.92047	0.00349502	0.0338304
Os01g0118600	114.027	-1.37259	0.470048	-2.92011	0.00349909	0.0338443
Os12g0617250	25.5793	3.90222	1.33672	2.91925	0.00350878	0.0339252
Os05g0210500	28.3321	-3.9757	1.36317	-2.91651	0.00353968	0.0341854
Os08g0429200	169.373	1.4842	0.508924	2.91635	0.00354158	0.0341909
Os12g0145100	380.684	1.56217	0.535872	2.9152	0.00355461	0.0342353
Os02g0633200	43.5406	1.31668	0.451635	2.91536	0.00355284	0.0342353
Os04g0666800	19.5748	2.31715	0.794969	2.91477	0.00355951	0.0342353
Os05g0461350	47.2716	1.10064	0.377572	2.91504	0.00355644	0.0342353
Os06g0126000	618.631	1.4299	0.490437	2.91556	0.00355054	0.0342353
Os08g0443800	3.85822	-5.29388	1.81635	-2.91456	0.00356186	0.0342451
Os10g0551200	120.443	1.47655	0.506768	2.91367	0.0035721	0.0343178
Os10g0165400	885.613	1.46036	0.501356	2.91283	0.00358169	0.0343842
Os10g0439924	7.70026	2.89111	0.992532	2.91286	0.00358136	0.0343842
Os08g0535700	59.8801	-1.63208	0.560355	-2.91258	0.00358452	0.0343985
Os02g0722600	11.3004	-3.76701	1.29392	-2.91132	0.00359901	0.0345018
Os07g0190000	157.642	-2.28576	0.785235	-2.91093	0.00360355	0.0345038
Os06g0122200	13.2049	-5.38069	1.84916	-2.90981	0.00361646	0.0345887
Os08g0393900	312.049	1.91855	0.65949	2.90914	0.00362419	0.0346369
Os04g0457000	7360.87	1.19481	0.410761	2.90877	0.00362858	0.0346659
Os05g0536250	12.5079	2.03996	0.701364	2.90856	0.00363103	0.0346764
Os10g0522800	171.339	1.76491	0.606829	2.90842	0.0036326	0.0346785
Os08g0247600	258.146	1.30335	0.448201	2.90796	0.00363792	0.0347163
Os06g0644200	76.8025	1.82241	0.626772	2.90762	0.00364192	0.0347287
Os01g0226600	89.1644	1.36499	0.469525	2.90718	0.00364708	0.0347651
[truncated: 238 more rows]

## Sheet: suf
Gene ID	Base mean	log2 FC	SE	Statistic	P	adjusted P
Os08g0231400	6267.95	-4.83033	0.301041	-16.0454	6.15395e-58	1.58034e-53
Os01g0141000	2741.28	-4.95458	0.321177	-15.4263	1.08888e-53	1.39812e-49
Os07g0617000	1892.63	-3.06523	0.211477	-14.4943	1.31568e-47	1.12622e-43
Os06g0306300	1415.41	-4.1478	0.288778	-14.3633	8.79451e-47	5.64607e-43
Os08g0203400	653.734	-7.86768	0.571548	-13.7656	4.10707e-43	2.10939e-39
Os01g0192900	781.221	-7.68827	0.560316	-13.7213	7.56692e-43	3.23864e-39
Os04g0688100	3759.28	-4.82072	0.363155	-13.2745	3.25278e-40	1.19331e-36
Os10g0409400	983.973	-8.53308	0.69129	-12.3437	5.26722e-35	1.69078e-31
Os03g0297600	2540.59	-3.05171	0.249848	-12.2143	2.60818e-34	7.44201e-31
Os07g0537500	534.27	-3.10928	0.255964	-12.1473	5.92736e-34	1.52215e-30
Os03g0790700	421.456	-4.75392	0.433588	-10.9641	5.68387e-28	1.32693e-24
Os07g0537600	314.57	-2.65853	0.247388	-10.7464	6.16002e-27	1.31824e-23
Os04g0688500	2204.04	-6.33662	0.615485	-10.2953	7.39641e-25	1.46108e-21
Os01g0963000	1366.13	-5.58084	0.544665	-10.2464	1.22863e-24	2.25366e-21
Os01g0326300	780.129	-6.574	0.656154	-10.019	1.25786e-23	2.15345e-20
Os10g0370500	1287.21	-2.21596	0.224456	-9.87259	5.47335e-23	8.78473e-20
Os09g0400400	251.017	-4.34887	0.443038	-9.81603	9.60524e-23	1.45096e-19
Os11g0226933	656.878	-4.72244	0.484293	-9.7512	1.82304e-22	2.60087e-19
Os05g0166300	136.384	-5.51887	0.566501	-9.74203	1.9952e-22	2.69667e-19
Os08g0465700	1301.55	-1.65087	0.169579	-9.73508	2.13653e-22	2.74331e-19
Os03g0233000	89.4033	-4.60433	0.478237	-9.62772	6.10691e-22	7.46788e-19
Os07g0251200	123.282	-4.36685	0.459896	-9.49529	2.19602e-21	2.56336e-18
Os05g0177500	729.573	3.42842	0.362143	9.46703	2.87903e-21	3.21449e-18
Os04g0489600	941.105	-3.28783	0.354298	-9.27985	1.69724e-20	1.81604e-17
Os04g0611400	429.788	-3.50877	0.384238	-9.13177	6.7389e-20	6.9222e-17
Os08g0508800	1860.68	-5.70854	0.626766	-9.10793	8.39657e-20	8.29322e-17
Os07g0542600	185.201	-4.64488	0.513711	-9.04181	1.54093e-19	1.4656e-16
Os04g0616500	686.033	-2.42447	0.270156	-8.97433	2.85082e-19	2.61461e-16
Os06g0678500	171.819	3.57215	0.404655	8.82765	1.06903e-18	9.46641e-16
Os12g0263600	327.761	1.73048	0.203609	8.49902	1.91202e-17	1.63669e-14
Os05g0181700	81.8442	-4.076	0.485648	-8.39291	4.74259e-17	3.9287e-14
Os07g0687900	342.533	2.00925	0.241386	8.32382	8.51709e-17	6.83497e-14
Os01g0975900	2403.43	3.65075	0.438885	8.31823	8.92889e-17	6.9483e-14
Os04g0684900	317.831	-4.97136	0.60137	-8.26673	1.37687e-16	1.03994e-13
Os04g0316200	267.004	-4.33679	0.52642	-8.23827	1.74724e-16	1.28198e-13
Os09g0434500	17816.2	-1.33479	0.162285	-8.22496	1.95249e-16	1.39277e-13
Os09g0399800	191.784	-8.04881	0.980208	-8.21133	2.18761e-16	1.51832e-13
Os08g0260600	201.261	-3.49025	0.427648	-8.16151	3.30862e-16	2.23593e-13
Os01g0326100	105.584	-4.78757	0.58847	-8.13562	4.09849e-16	2.67012e-13
Os03g0242300	337.808	3.06104	0.376333	8.13384	4.15907e-16	2.67012e-13
Os09g0356800	252.521	-5.21245	0.64128	-8.12819	4.3573e-16	2.72916e-13
Os03g0843800	881.646	4.4876	0.552832	8.11749	4.75937e-16	2.91002e-13
Os09g0339000	316.499	-3.50904	0.433452	-8.09559	5.69889e-16	3.40343e-13
Os12g0231000	649.529	2.43243	0.301999	8.05442	7.98553e-16	4.61457e-13
Os03g0757200	951.847	4.46182	0.554065	8.05289	8.08628e-16	4.61457e-13
Os05g0149300	500.896	-2.29609	0.285592	-8.03976	9.00126e-16	5.02505e-13
Os08g0249900	174.243	2.49654	0.311443	8.01606	1.09193e-15	5.96609e-13
Os11g0250400	52.1816	-6.20441	0.77909	-7.96366	1.67017e-15	8.93542e-13
Os04g0469000	2891.74	-3.90435	0.496588	-7.86235	3.76993e-15	1.97575e-12
Os04g0405900	1925.48	-2.01218	0.256341	-7.84964	4.17232e-15	2.1429e-12
Os03g0739700	161.482	-2.98305	0.383748	-7.77348	7.63603e-15	3.84497e-12
Os11g0256900	2823.56	-4.02154	0.519331	-7.7437	9.65662e-15	4.76889e-12
Os02g0603600	620.792	-2.40411	0.311423	-7.71974	1.16566e-14	5.64794e-12
Os07g0561800	134.906	-2.96501	0.387826	-7.6452	2.08629e-14	9.92146e-12
Os11g0649700	573.787	-2.95289	0.386718	-7.63577	2.24468e-14	1.04806e-11
Os01g0511000	571.046	-2.32915	0.305279	-7.6296	2.35485e-14	1.07987e-11
Os08g0452900	619.186	-1.87453	0.247669	-7.56869	3.77021e-14	1.69858e-11
Os04g0401700	697.27	-3.7825	0.503393	-7.514	5.73468e-14	2.53908e-11
Os11g0618700	541.178	-1.983	0.264222	-7.50505	6.14064e-14	2.67274e-11
Os05g0553400	320.672	-2.15055	0.288656	-7.45021	9.31885e-14	3.98847e-11
Os07g0677200	3022.14	-3.23183	0.435732	-7.417	1.198e-13	5.0434e-11
Os01g0813800	1054.85	-1.74079	0.236791	-7.35159	1.95866e-13	8.11265e-11
Os09g0412700	466.08	2.15959	0.295713	7.30301	2.81395e-13	1.14702e-10
Os01g0816100	177.189	-3.10966	0.426972	-7.28306	3.26341e-13	1.30944e-10
Os07g0598200	1823.27	-1.09399	0.150718	-7.25854	3.91304e-13	1.54595e-10
Os03g0232400	354.56	2.38323	0.331426	7.19082	6.4402e-13	2.50582e-10
Os05g0525900	461.837	-2.1053	0.295418	-7.12651	1.02948e-12	3.94581e-10
Os06g0649000	137.218	-5.39901	0.765963	-7.04866	1.80651e-12	6.82223e-10
Os09g0554300	1236.53	-1.54454	0.219874	-7.02465	2.14598e-12	7.98678e-10
Os08g0351200	954.719	-2.43586	0.347956	-7.00049	2.55072e-12	9.3575e-10
Os06g0228200	1426.91	1.34812	0.19346	6.96846	3.20426e-12	1.15895e-09
Os02g0579800	870.431	-1.92164	0.276216	-6.95703	3.47531e-12	1.23953e-09
Os11g0278300	180.615	-3.78043	0.544457	-6.94348	3.82569e-12	1.33544e-09
Os03g0150600	1857.24	-2.569	0.370032	-6.94265	3.84823e-12	1.33544e-09
Os01g0713200	1140.35	-4.54884	0.660448	-6.8875	5.67806e-12	1.94417e-09
Os03g0225900	312.36	-2.78549	0.405536	-6.86866	6.48074e-12	2.18981e-09
Os01g0580500	455.43	-1.8011	0.262856	-6.85204	7.28066e-12	2.42815e-09
Os03g0183000	915.272	-2.79275	0.407749	-6.84919	7.42713e-12	2.44524e-09
Os02g0527600	2398.75	-2.10655	0.308749	-6.82286	8.92446e-12	2.87556e-09
Os09g0286600	2412.42	-1.98967	0.291642	-6.82232	8.95815e-12	2.87556e-09
Os11g0614500	539.714	-1.93709	0.286378	-6.76409	1.3415e-11	4.25306e-09
Os04g0556500	144.984	-3.02479	0.449023	-6.73639	1.62367e-11	5.08485e-09
Os09g0481700	1824.69	-1.35275	0.201581	-6.71069	1.937e-11	5.99305e-09
Os08g0482700	6063.76	-1.92632	0.287766	-6.69405	2.1708e-11	6.63644e-09
Os09g0272000	857.287	2.6724	0.399385	6.69131	2.21188e-11	6.68249e-09
Os11g0474800	68.584	-5.97308	0.893528	-6.68483	2.312e-11	6.90374e-09
Os08g0562600	3101.22	-1.5626	0.233838	-6.68242	2.35033e-11	6.93753e-09
Os06g0618700	596.575	-1.59172	0.238335	-6.67853	2.41352e-11	7.0431e-09
Os02g0608000	99.5945	6.63837	0.99972	6.64022	3.13207e-11	9.03725e-09
Os01g0677900	118.142	-3.68143	0.554899	-6.63441	3.25794e-11	9.296e-09
Os06g0522300	73.1788	-5.21577	0.786693	-6.62999	3.35706e-11	9.47356e-09
Os01g0268600	375.232	-1.78297	0.269885	-6.60642	3.9372e-11	1.09899e-08
Os02g0695800	675.248	-1.23578	0.187387	-6.59479	4.25858e-11	1.17592e-08
Os09g0357400	340.783	-3.97991	0.603811	-6.59132	4.35935e-11	1.19094e-08
Os02g0654700	147.901	-3.70517	0.562481	-6.58719	4.48215e-11	1.21159e-08
Os11g0298000	74.8758	-6.54893	0.995938	-6.57564	4.84431e-11	1.29585e-08
Os01g0944100	654.831	4.48975	0.683142	6.57221	4.95739e-11	1.31243e-08
Os01g0203400	41.1964	-3.19595	0.486828	-6.56486	5.20815e-11	1.36475e-08
Os07g0628900	1495.92	3.51727	0.536619	6.5545	5.5829e-11	1.44817e-08
Os07g0543300	163.769	5.31024	0.813175	6.53025	6.56597e-11	1.68614e-08
Os01g0952500	1175.02	1.09518	0.167786	6.52723	6.69983e-11	1.70348e-08
Os01g0687400	328.572	-3.17512	0.488942	-6.49385	8.36699e-11	2.10651e-08
Os04g0680400	656.9	-2.13613	0.330011	-6.47289	9.61466e-11	2.39713e-08
Os04g0515900	55.8264	-4.12701	0.640023	-6.44823	1.13167e-10	2.78641e-08
Os04g0565500	877.035	-2.18551	0.338986	-6.44721	1.1393e-10	2.78641e-08
Os02g0712700	300.884	-1.68645	0.261912	-6.439	1.20264e-10	2.91356e-08
Os12g0576700	302.934	-2.77936	0.432602	-6.42476	1.3208e-10	3.16991e-08
Os03g0194900	1513.38	-1.55566	0.242821	-6.40661	1.48792e-10	3.53795e-08
Os01g0138500	276.639	1.85891	0.290511	6.39877	1.56636e-10	3.69028e-08
Os12g0133100	302.94	2.31168	0.361444	6.39568	1.59835e-10	3.73141e-08
Os09g0350900	116.152	-3.58279	0.560816	-6.38852	1.67495e-10	3.87502e-08
Os08g0378000	459.759	-2.98672	0.467938	-6.38272	1.73966e-10	3.98879e-08
Os12g0547600	527.883	-2.60121	0.410249	-6.34058	2.289e-10	5.2019e-08
Os01g0364800	166.786	-2.33847	0.369109	-6.33544	2.36664e-10	5.33117e-08
Os05g0136200	364.075	-1.45494	0.229713	-6.33372	2.39326e-10	5.34425e-08
Os03g0654400	806.566	-1.49846	0.23686	-6.32633	2.51061e-10	5.55797e-08
Os04g0616700	919.764	-2.04056	0.323068	-6.31619	2.68092e-10	5.88427e-08
Os02g0562600	110.403	-3.17918	0.5037	-6.31165	2.76082e-10	6.00828e-08
Os06g0561000	601.004	-1.85036	0.294243	-6.28854	3.20457e-10	6.91541e-08
Os09g0570800	72.3356	-4.34385	0.691291	-6.28368	3.30643e-10	7.07576e-08
Os03g0235000	181.749	-3.3378	0.535217	-6.23634	4.47916e-10	9.50619e-08
Os06g0707800	801.326	-1.40929	0.226037	-6.23475	4.52489e-10	9.52453e-08
Os07g0635700	940.819	1.50574	0.241616	6.23195	4.60676e-10	9.61801e-08
Os06g0694200	180.539	4.19904	0.674683	6.22372	4.85517e-10	1.00549e-07
Os09g0425200	31.7792	8.65383	1.39373	6.20911	5.3284e-10	1.09467e-07
Os04g0154800	76.6001	-4.31911	0.695811	-6.20731	5.39e-10	1.09853e-07
Os01g0827800	45.0737	-4.73089	0.76235	-6.20567	5.44638e-10	1.10128e-07
Os11g0541600	227.187	-2.3891	0.385185	-6.20248	5.55799e-10	1.11507e-07
Os02g0194700	11491	3.05014	0.493437	6.18143	6.35241e-10	1.26457e-07
Os09g0478300	1216.88	3.34847	0.542103	6.17681	6.5408e-10	1.29206e-07
Os04g0559400	441.529	-1.28664	0.208408	-6.17365	6.67297e-10	1.30811e-07
Os11g0156600	59.3647	-4.47539	0.726653	-6.15891	7.32488e-10	1.42502e-07
Os01g0136700	49.0758	-3.70746	0.60285	-6.14989	7.7535e-10	1.49707e-07
Os02g0475400	2136.51	2.0285	0.330262	6.14208	8.14457e-10	1.56084e-07
Os11g0489250	1017.27	3.07348	0.500535	6.14038	8.23253e-10	1.56601e-07
Os05g0380200	151.725	-3.86609	0.630825	-6.12863	8.86407e-10	1.67374e-07
Os01g0796000	129.995	-4.72286	0.772927	-6.11035	9.94115e-10	1.86342e-07
Os10g0511200	27.2943	-8.11329	1.32965	-6.10181	1.04872e-09	1.95152e-07
Os04g0365100	31.257	-5.08889	0.836523	-6.08338	1.17673e-09	2.17399e-07
Os06g0725200	161.745	-2.25779	0.371949	-6.07017	1.27778e-09	2.32844e-07
Os09g0353200	61.0926	-4.55128	0.749789	-6.07008	1.27847e-09	2.32844e-07
Os06g0228500	173.984	2.12732	0.350696	6.06599	1.31146e-09	2.37171e-07
Os06g0206900	174.116	1.77118	0.294233	6.01964	1.74802e-09	3.1391e-07
Os08g0384500	1018.87	-3.01375	0.500802	-6.01785	1.7675e-09	3.15204e-07
Os05g0409500	206.615	-3.15023	0.52524	-5.9977	2.00128e-09	3.54433e-07
Os07g0539900	855.497	-4.00111	0.668737	-5.98308	2.18954e-09	3.8512e-07
Os01g0940700	1707.75	-3.74756	0.627041	-5.97657	2.27878e-09	3.9809e-07
Os01g0898800	647.92	1.12289	0.187951	5.97436	2.30995e-09	4.00808e-07
Os08g0109300	2817.84	1.30782	0.219117	5.96858	2.39333e-09	4.12489e-07
Os02g0563000	45.5035	4.41602	0.740307	5.96512	2.44461e-09	4.18517e-07
Os03g0437200	48.9051	-8.51042	1.42767	-5.96104	2.50632e-09	4.26241e-07
Os04g0127100	39.5465	-7.82291	1.31444	-5.9515	2.65693e-09	4.48882e-07
Os02g0681200	411.591	-1.69346	0.285936	-5.92251	3.17061e-09	5.32165e-07
Os04g0468600	399.87	-4.16471	0.704385	-5.91256	3.36839e-09	5.58066e-07
Os02g0787600	444.714	-1.99684	0.33847	-5.8996	3.64386e-09	5.99836e-07
Os05g0258400	37.9344	-3.03346	0.517337	-5.8636	4.52944e-09	7.40866e-07
Os10g0469700	310.785	-2.01716	0.344218	-5.86011	4.62567e-09	7.51818e-07
Os07g0538700	93.6101	-1.84491	0.315048	-5.85596	4.74269e-09	7.6599e-07
Os09g0319800	59.6852	-7.94613	1.36225	-5.83307	5.44173e-09	8.73398e-07
Os02g0638650	91.6102	3.27095	0.561175	5.82875	5.58443e-09	8.90734e-07
Os05g0397300	1221.42	-1.29014	0.221512	-5.82422	5.73787e-09	9.09559e-07
Os03g0729300	2204.49	-1.5273	0.263551	-5.79507	6.82909e-09	1.0759e-06
Os09g0460500	869.583	1.93811	0.33519	5.78211	7.37673e-09	1.15509e-06
Os02g0512000	31.8735	-3.85361	0.668642	-5.76334	8.24659e-09	1.28347e-06
Os03g0187800	17.4144	-7.70806	1.34289	-5.7399	9.47307e-09	1.46547e-06
Os07g0628700	3682.43	3.01049	0.526148	5.72176	1.05429e-08	1.62121e-06
Os01g0670100	164.029	-3.23323	0.565846	-5.71399	1.1036e-08	1.67695e-06
Os01g0858900	275.879	-1.53534	0.269683	-5.69313	1.24731e-08	1.88029e-06
Os09g0424200	51.3788	-4.0696	0.714908	-5.69248	1.25206e-08	1.88029e-06
Os10g0370400	153.934	-1.20419	0.212153	-5.67608	1.37818e-08	2.05766e-06
Os07g0680400	105.425	-2.5138	0.443493	-5.66817	1.44327e-08	2.14238e-06
Os01g0337500	41.6882	-3.5441	0.625621	-5.66493	1.47085e-08	2.17076e-06
Os11g0669100	151.832	-2.88171	0.509667	-5.6541	1.56664e-08	2.29893e-06
Os12g0210400	2817.84	-1.68498	0.298658	-5.64183	1.68253e-08	2.45496e-06
Os04g0635650	303.287	-3.5246	0.625941	-5.63089	1.79284e-08	2.60114e-06
Os08g0355400	2200.24	-2.00659	0.357067	-5.61964	1.91356e-08	2.74527e-06
Os06g0554600	244.937	1.26541	0.225403	5.61397	1.97734e-08	2.82101e-06
Os05g0576500	127.311	-2.37913	0.423867	-5.61291	1.98957e-08	2.82278e-06
Os02g0606800	452.928	-1.55816	0.278255	-5.59976	2.14655e-08	3.02875e-06
Os02g0199200	172.539	-1.91379	0.342087	-5.59443	2.21342e-08	3.10605e-06
Os02g0532500	1540.49	-1.96925	0.352343	-5.58903	2.28345e-08	3.1869e-06
Os03g0729000	1234.52	2.47798	0.443901	5.58227	2.37394e-08	3.27757e-06
Os06g0288100	691.698	-2.0091	0.359884	-5.58263	2.36915e-08	3.27757e-06
Os06g0125500	1401.44	-1.74073	0.311902	-5.58103	2.39098e-08	3.28344e-06
Os03g0820500	843.792	3.67982	0.659902	5.57631	2.4568e-08	3.33813e-06
Os05g0473000	16.2267	-7.3805	1.32341	-5.57686	2.44898e-08	3.33813e-06
Os01g0953500	626.398	1.20572	0.217058	5.55483	2.77883e-08	3.75213e-06
Os04g0565400	720.76	-1.53242	0.275909	-5.55408	2.79072e-08	3.75213e-06
Os01g0695300	1082.57	1.65544	0.29838	5.5481	2.88797e-08	3.86267e-06
Os09g0246300	1225.86	-2.00642	0.361842	-5.54503	2.93912e-08	3.91071e-06
Os07g0150700	666.352	-1.569	0.283546	-5.53349	3.13927e-08	4.15549e-06
Os08g0423500	67.927	-8.17529	1.47923	-5.52673	3.26251e-08	4.29648e-06
Os05g0311500	893.282	2.11993	0.383793	5.52363	3.32065e-08	4.35074e-06
Os06g0671600	30.6811	-8.36398	1.51452	-5.52255	3.34124e-08	4.35548e-06
Os01g0681700	262.198	-2.20517	0.399589	-5.51861	3.41691e-08	4.43163e-06
Os02g0242900	30.8113	-4.68997	0.850095	-5.517	3.44831e-08	4.44987e-06
Os04g0370900	472.803	-3.34732	0.606829	-5.51609	3.46626e-08	4.45068e-06
Os12g0592900	79.8905	-3.78507	0.687247	-5.50758	3.63803e-08	4.64799e-06
Os01g0660200	420.653	-3.31514	0.602358	-5.50361	3.72085e-08	4.73026e-06
Os11g0474900	20.3221	-7.47473	1.35901	-5.50011	3.79559e-08	4.80151e-06
Os06g0218900	46.478	-3.78848	0.690981	-5.48276	4.18749e-08	5.27132e-06
Os02g0209300	88.2972	-3.41394	0.624049	-5.47062	4.48458e-08	5.61776e-06
Os05g0500200	93.4974	2.56415	0.469653	5.45967	4.77025e-08	5.9466e-06
Os03g0764000	521.5	-2.30086	0.422266	-5.44885	5.06978e-08	6.28947e-06
Os03g0764100	570.844	-1.80947	0.332528	-5.44156	5.28173e-08	6.52091e-06
Os01g0669100	314.099	-2.65011	0.488803	-5.42164	5.90557e-08	7.18745e-06
Os04g0513400	217.93	3.02633	0.558109	5.42247	5.87798e-08	7.18745e-06
Os09g0447300	65.9448	-3.2689	0.604116	-5.41105	6.26549e-08	7.58952e-06
Os01g0621900	3532.86	1.69731	0.314242	5.40129	6.61652e-08	7.93982e-06
Os06g0710300	1930.91	-1.57093	0.290813	-5.40186	6.59543e-08	7.93982e-06
Os03g0432100	382.827	-1.98618	0.368415	-5.39116	7.00062e-08	8.2466e-06
Os06g0521500	63.9743	-4.8604	0.901517	-5.39135	6.9929e-08	8.2466e-06
Os03g0676400	37.4169	-3.35496	0.622574	-5.38886	7.09053e-08	8.31438e-06
Os08g0190100	19.2516	-7.11713	1.32385	-5.3761	7.61151e-08	8.88471e-06
Os11g0625801	35.7121	-5.70533	1.06404	-5.36197	8.23189e-08	9.56538e-06
Os03g0189400	1067.28	-1.90857	0.356258	-5.35728	8.44862e-08	9.75744e-06
Os03g0287100	142.935	1.54953	0.289266	5.35675	8.47317e-08	9.75744e-06
Os04g0458300	266.682	-1.77237	0.331075	-5.35338	8.63263e-08	9.8967e-06
Os04g0464100	89.8663	-3.35142	0.628131	-5.33553	9.52635e-08	1.08727e-05
Os04g0585200	2432.18	1.17486	0.220261	5.33397	9.60882e-08	1.09183e-05
Os10g0513200	194.229	1.2284	0.230488	5.32957	9.84476e-08	1.11128e-05
Os07g0569800	17.9697	-6.03971	1.13333	-5.32917	9.86647e-08	1.11128e-05
Os05g0149400	173.456	-2.39295	0.44939	-5.32488	1.01018e-07	1.13281e-05
Os04g0288100	75.9697	-6.06421	1.13933	-5.32259	1.023e-07	1.14221e-05
Os03g0371350	162.926	2.43047	0.45706	5.31761	1.05141e-07	1.16884e-05
Os07g0491800	684.327	1.8138	0.341251	5.31514	1.06573e-07	1.17966e-05
Os11g0567800	60.4392	-4.0694	0.769431	-5.28884	1.23092e-07	1.35666e-05
Os10g0376900	71.0254	-3.17982	0.601461	-5.28683	1.24452e-07	1.36578e-05
Os02g0822900	77.811	-2.76771	0.523674	-5.28519	1.25574e-07	1.37223e-05
Os01g0940800	394.383	-3.43504	0.65045	-5.28102	1.28469e-07	1.39792e-05
Os02g0314300	673.136	3.2624	0.618235	5.27695	1.31349e-07	1.42322e-05
Os04g0366000	64.773	-6.07753	1.15437	-5.26479	1.40351e-07	1.51437e-05
Os02g0823100	1266.06	2.21993	0.421784	5.26318	1.41582e-07	1.52126e-05
Os01g0194300	267.419	-1.85816	0.353165	-5.26144	1.42933e-07	1.52938e-05
Os09g0325700	133.105	3.67262	0.698977	5.25427	1.48611e-07	1.58354e-05
Os02g0128000	97.9323	2.03817	0.388079	5.25195	1.50499e-07	1.59703e-05
Os07g0493800	22.689	-4.62809	0.881948	-5.24757	1.54115e-07	1.62867e-05
Os04g0468000	253.761	-6.57624	1.25371	-5.2454	1.55942e-07	1.64123e-05
Os04g0541700	408.601	2.54956	0.487986	5.22466	1.74479e-07	1.82883e-05
Os04g0688600	140.261	-3.94997	0.757416	-5.21507	1.8375e-07	1.91817e-05
Os01g0704300	1227.6	-1.24368	0.239067	-5.20224	1.96903e-07	2.03999e-05
Os03g0412400	77.4942	-3.02332	0.581168	-5.20214	1.97008e-07	2.03999e-05
Os10g0524700	77.4102	-2.31468	0.445502	-5.19566	2.03992e-07	2.10382e-05
Os05g0365600	687.816	1.24503	0.239959	5.18851	2.11979e-07	2.17744e-05
Os10g0570200	69.0791	-4.70028	0.907441	-5.17971	2.22232e-07	2.27368e-05
Os12g0594000	72.6521	2.37571	0.458993	5.17591	2.26797e-07	2.29937e-05
Os05g0468900	176.283	-2.14582	0.414619	-5.17539	2.2743e-07	2.29937e-05
Os07g0412100	7676.41	1.10388	0.213254	5.17637	2.26239e-07	2.29937e-05
Os04g0117900	841.607	-1.86924	0.361636	-5.16884	2.35546e-07	2.37209e-05
Os08g0203150	73.7937	-5.40933	1.04772	-5.16298	2.43048e-07	2.43083e-05
Os08g0507701	25.1068	-3.72096	0.720724	-5.16281	2.43272e-07	2.43083e-05
Os08g0448000	96.6503	-3.38624	0.656305	-5.15956	2.47537e-07	2.46385e-05
Os07g0603800	939.078	-1.45117	0.281637	-5.15264	2.56849e-07	2.54667e-05
Os01g0564300	389.642	-2.98401	0.580237	-5.14274	2.70753e-07	2.67421e-05
Os03g0806600	746.083	-1.86468	0.362694	-5.14119	2.73003e-07	2.6861e-05
Os01g0846400	51.1919	4.8854	0.950619	5.13918	2.75946e-07	2.70469e-05
Os01g0830700	797.336	-1.39021	0.270634	-5.13685	2.79382e-07	2.72796e-05
Os05g0195700	325.01	1.20104	0.233986	5.13296	2.85221e-07	2.77442e-05
Os07g0507000	831.509	-1.21958	0.237751	-5.12966	2.90267e-07	2.80814e-05
Os09g0547500	289.664	-2.12952	0.415171	-5.12927	2.90874e-07	2.80814e-05
Os03g0342100	118.36	-1.73737	0.338963	-5.12555	2.96667e-07	2.85334e-05
Os01g0140700	79.3182	-3.14433	0.613724	-5.12336	3.00143e-07	2.87599e-05
Os01g0274100	22.6428	5.34651	1.04407	5.12081	3.04222e-07	2.90425e-05
Os06g0282000	75.8525	-2.5533	0.499237	-5.11441	3.14727e-07	2.99341e-05
Os01g0714600	72.2784	-3.34882	0.655353	-5.10995	3.22249e-07	3.05364e-05
Os04g0619400	293.121	-1.56309	0.3061	-5.10647	3.28234e-07	3.09892e-05
Os09g0538000	3140.6	3.55413	0.696121	5.10562	3.29717e-07	3.10152e-05
Os06g0683100	59.1781	3.44215	0.674791	5.10106	3.37765e-07	3.14677e-05
Os08g0202300	4600.55	-2.30324	0.45149	-5.10143	3.37102e-07	3.14677e-05
Os08g0444440	27.1597	2.47204	0.484637	5.10081	3.38204e-07	3.14677e-05
Os02g0683800	74.0051	-1.93835	0.3804	-5.09556	3.47703e-07	3.22347e-05
Os08g0495500	495.452	-1.21242	0.238125	-5.09151	3.55214e-07	3.28126e-05
Os05g0256500	191.217	-1.52282	0.299205	-5.08956	3.58892e-07	3.30335e-05
Os07g0225300	225.157	-1.94919	0.383325	-5.08495	3.67726e-07	3.37257e-05
Os02g0206700	979.763	1.80653	0.355455	5.0823	3.72891e-07	3.40777e-05
Os10g0508700	3436.79	-1.50042	0.296493	-5.06054	4.18076e-07	3.79371e-05
Os07g0654500	96.0746	-2.98809	0.592653	-5.04188	4.60974e-07	4.16824e-05
Os10g0491450	23.0337	-7.50726	1.48934	-5.04066	4.63932e-07	4.18027e-05
Os05g0427400	383.791	-2.38032	0.472706	-5.03553	4.76538e-07	4.27885e-05
Os03g0850400	3165.44	2.13687	0.424598	5.0327	4.83617e-07	4.32728e-05
Os11g0229500	27.6527	-4.51186	0.897102	-5.02937	4.92103e-07	4.38792e-05
Os01g0389700	224.289	-2.44848	0.487379	-5.02378	5.06648e-07	4.49416e-05
Os09g0355400	1314.77	-1.65368	0.329193	-5.02345	5.07518e-07	4.49416e-05
Os08g0203201	68.5079	-5.41005	1.07714	-5.02259	5.0979e-07	4.49876e-05
Os10g0389150	204.6	1.361	0.271086	5.02054	5.15271e-07	4.53156e-05
Os06g0204400	438.981	1.00882	0.20097	5.01977	5.17346e-07	4.53428e-05
Os12g0512800	18.3204	-5.29096	1.05625	-5.0092	5.46575e-07	4.77416e-05
Os03g0582000	889.831	1.30398	0.260512	5.00547	5.57256e-07	4.83805e-05
Os09g0313550	23.9455	-2.50407	0.500281	-5.00533	5.57657e-07	4.83805e-05
Os01g0846300	284.641	1.52168	0.304115	5.00364	5.62586e-07	4.86438e-05
Os08g0189300	89.6898	1.76342	0.352498	5.00263	5.65528e-07	4.87341e-05
Os06g0239100	50.1279	-3.10655	0.621145	-5.00132	5.69377e-07	4.89017e-05
Os05g0417600	286.587	-2.12184	0.424897	-4.99379	5.92069e-07	5.06811e-05
Os03g0625300	27.4652	3.79274	0.761694	4.97935	6.37967e-07	5.44285e-05
Os01g0720400	272.276	-1.96024	0.394183	-4.97292	6.59512e-07	5.58953e-05
Os11g0475000	13.3147	-7.09343	1.42701	-4.97082	6.66687e-07	5.63175e-05
Os07g0661000	257.424	1.49148	0.300444	4.96426	6.89632e-07	5.7875e-05
Os12g0159000	358.871	-1.93373	0.389863	-4.96003	7.04821e-07	5.8957e-05
Os04g0423600	4191.47	1.18193	0.238332	4.95917	7.07951e-07	5.90265e-05
Os10g0173000	137.513	2.54142	0.512728	4.95666	7.17135e-07	5.95988e-05
Os03g0198600	76.9714	-2.8114	0.568443	-4.94579	7.58349e-07	6.28206e-05
Os04g0688300	627.751	-1.85299	0.374751	-4.94458	7.63068e-07	6.30083e-05
Os09g0471100	163.003	-1.44651	0.292657	-4.94268	7.70576e-07	6.34243e-05
Os01g0681800	39.0439	-3.67995	0.744791	-4.94091	7.77592e-07	6.36834e-05
Os03g0849900	110.599	1.63202	0.330325	4.94064	7.78684e-07	6.36834e-05
Os03g0664800	166.611	-2.95011	0.597221	-4.93973	7.82305e-07	6.37765e-05
Os05g0322900	599.23	-1.98177	0.402394	-4.92495	8.43835e-07	6.85749e-05
Os07g0142900	10159.2	1.94894	0.395935	4.92238	8.54962e-07	6.926e-05
Os03g0298300	539.731	1.0449	0.212459	4.91811	8.73826e-07	7.05656e-05
Os10g0148400	421.333	1.52929	0.3113	4.91259	8.98808e-07	7.23554e-05
Os10g0140700	301.064	1.94931	0.397499	4.90392	9.3942e-07	7.51536e-05
Os10g0467900	288.126	-1.0176	0.207489	-4.90435	9.37387e-07	7.51536e-05
Os01g0841700	90.6237	-3.00459	0.61316	-4.90018	9.57484e-07	7.63609e-05
Os03g0400800	39.4937	-3.02519	0.617891	-4.89599	9.78115e-07	7.77647e-05
Os04g0423400	2916.48	1.69313	0.346024	4.8931	9.92579e-07	7.86711e-05
Os11g0625900	67.4535	-3.90413	0.798132	-4.89158	1.00029e-06	7.90383e-05
Os01g0975300	1374.96	-2.2887	0.468599	-4.88412	1.03889e-06	8.18369e-05
Os03g0660500	15.6013	-6.95483	1.42577	-4.87796	1.07188e-06	8.41767e-05
Os09g0287000	1861.78	-1.88432	0.386346	-4.87728	1.07557e-06	8.42092e-05
Os04g0546800	1819.04	-1.81329	0.371993	-4.87452	1.09076e-06	8.51387e-05
Os08g0386200	274.32	-2.49211	0.513194	-4.85607	1.19739e-06	9.3179e-05
Os01g0613500	107.246	-3.80337	0.783843	-4.85221	1.22091e-06	9.47217e-05
Os05g0150733	99.4817	1.19107	0.245535	4.85091	1.22895e-06	9.50582e-05
Os03g0815100	1238.7	-2.3551	0.4875	-4.83096	1.35876e-06	0.000104784
Os03g0610400	111.044	-2.49841	0.517833	-4.82475	1.40182e-06	0.000107781
Os01g0870400	15.8691	5.64368	1.17093	4.81984	1.4367e-06	0.000110133
Os11g0676500	42.9665	-2.68542	0.557483	-4.81704	1.45703e-06	0.000111358
Os06g0110000	571.06	-1.31039	0.272072	-4.81634	1.46213e-06	0.000111417
Os02g0124501	32.0117	3.0631	0.636541	4.8121	1.49356e-06	0.000113151
Os10g0491400	67.4151	-5.53971	1.15252	-4.80662	1.535e-06	0.000115938
Os11g0565000	51.9044	-2.4635	0.513141	-4.80082	1.58017e-06	0.000118652
Os04g0538400	21.9333	-5.8059	1.21142	-4.79266	1.64588e-06	0.000123225
Os07g0538200	34.1936	-3.15896	0.659213	-4.79202	1.65112e-06	0.000123258
Os02g0584700	173.618	-2.34686	0.490164	-4.78791	1.68528e-06	0.000125081
Os05g0485300	148.336	-2.19371	0.458489	-4.78466	1.71279e-06	0.000126757
Os09g0537700	6263.16	2.90504	0.608397	4.7749	1.79796e-06	0.000132677
Os02g0468200	124.523	1.11925	0.234905	4.76469	1.89149e-06	0.000139179
Os03g0255500	3365.39	-1.4953	0.314152	-4.7598	1.93782e-06	0.000142181
Os01g0597800	83.7206	-2.53537	0.533063	-4.75624	1.97232e-06	0.0001443
Os01g0221600	370.822	-1.76172	0.371154	-4.7466	2.06867e-06	0.000150491
Os09g0294000	10813	1.60555	0.338252	4.74661	2.06852e-06	0.000150491
Os01g0575200	162.626	-2.50158	0.527172	-4.74529	2.08207e-06	0.00015086
Os01g0763750	342.649	-1.07866	0.227377	-4.74395	2.0959e-06	0.000151188
Os12g0611100	319.049	-1.31099	0.276556	-4.7404	2.13298e-06	0.000153431
Os04g0674700	58.2512	-2.32298	0.490814	-4.73292	2.21318e-06	0.000158755
Os01g0916100	102.596	-4.01107	0.848619	-4.72658	2.28333e-06	0.000163331
Os06g0652300	24.4618	3.51527	0.744879	4.71924	2.36725e-06	0.000168864
Os01g0216000	36.9114	-3.99377	0.846525	-4.71785	2.38355e-06	0.000169555
Os03g0114100	56.5791	-2.2911	0.486155	-4.71269	2.44473e-06	0.000173427
Os09g0497000	440.536	1.08736	0.230955	4.70809	2.50049e-06	0.000176894
Os05g0217700	10608.8	2.05312	0.437078	4.69738	2.63519e-06	0.000185402
Os12g0431100	179.541	-3.84492	0.819198	-4.69352	2.68543e-06	0.00018842
Os05g0527900	22.0249	3.68148	0.784912	4.6903	2.72804e-06	0.000190889
Os04g0691900	87.8757	2.9613	0.631551	4.68893	2.74642e-06	0.000191133
Os05g0548900	2459.13	1.96947	0.420201	4.68697	2.77281e-06	0.000192448
Os11g0209000	2621.36	1.55483	0.331854	4.68527	2.7959e-06	0.000193364
Os11g0247000	330.664	-1.90157	0.405895	-4.68489	2.80106e-06	0.000193364
Os02g0669100	811.716	1.27017	0.271691	4.67507	2.93849e-06	0.000202307
Os05g0343400	3556.78	-1.30038	0.278426	-4.67047	3.00517e-06	0.000206344
Os04g0524500	255.926	-2.42161	0.51882	-4.66754	3.04821e-06	0.000208741
Os01g0153800	16.3211	-5.52881	1.18523	-4.66473	3.09016e-06	0.000211051
Os05g0380300	422.249	-1.80588	0.387323	-4.66246	3.12455e-06	0.000212834
Os09g0346600	224.904	-1.21619	0.260922	-4.66111	3.1451e-06	0.000213667
Os07g0181100	22.1857	-7.10034	1.52899	-4.6438	3.42067e-06	0.000231165
Os01g0583100	974.596	1.65261	0.356159	4.64008	3.48273e-06	0.000234742
Os11g0569600	121.7	-2.05571	0.443493	-4.63526	3.56492e-06	0.000239026
Os08g0409100	1465.42	1.42201	0.30676	4.6356	3.55911e-06	0.000239026
Os01g0750500	166.84	-1.64724	0.355545	-4.633	3.60407e-06	0.000241022
Os09g0268800	8.69758	-6.55236	1.41456	-4.63208	3.62002e-06	0.00024146
Os10g0348900	165.992	-2.13044	0.460519	-4.62617	3.72498e-06	0.00024654
Os05g0486100	451.08	-2.40832	0.520588	-4.62617	3.72498e-06	0.00024654
Os06g0650900	1095.61	-1.31273	0.283717	-4.6269	3.71184e-06	0.00024654
Os03g0764900	17.6406	5.45897	1.18139	4.62079	3.82273e-06	0.000252359
Os02g0600400	389.677	-1.32996	0.289606	-4.59231	4.38374e-06	0.000287914
Os04g0532400	1057.53	1.95202	0.425225	4.59055	4.4208e-06	0.000289607
Os07g0529600	50276.4	1.8064	0.393946	4.58541	4.53107e-06	0.000295325
Os02g0484975	55.7464	2.12137	0.463929	4.57261	4.81675e-06	0.000311572
Os02g0175950	68.6771	-2.45274	0.537239	-4.56546	4.98412e-06	0.000320782
Os01g0186600	25.1559	-7.70261	1.68738	-4.56484	4.99879e-06	0.000320922
Os02g0690600	16.8983	6.58673	1.44546	4.55683	5.19324e-06	0.000331747
Os10g0492900	1236.3	1.78267	0.391272	4.55609	5.21135e-06	0.000332078
Os02g0132500	2049.24	-1.19046	0.261386	-4.55441	5.25317e-06	0.000333914
Os04g0585900	33.92	2.88734	0.634181	4.55286	5.29219e-06	0.000334174
Os07g0538400	177.098	-1.99504	0.438186	-4.55296	5.28965e-06	0.000334174
Os06g0655100	1129.15	-1.21329	0.266722	-4.5489	5.39269e-06	0.000339422
Os02g0807800	64.1836	-4.26751	0.940824	-4.53592	5.73517e-06	0.000360096
Os05g0135400	11.4534	-6.62901	1.46442	-4.5267	5.99119e-06	0.000375253
Os07g0687200	1333.2	-1.07903	0.238867	-4.51728	6.26399e-06	0.000391385
Os04g0452700	356.513	-1.99745	0.442776	-4.51119	6.44644e-06	0.000401807
Os07g0539100	651.821	-2.0075	0.445149	-4.50973	6.49102e-06	0.000403607
Os03g0856500	19134.7	-1.15298	0.256047	-4.503	6.70013e-06	0.000415602
Os01g0912850	30.7419	-6.56466	1.46186	-4.49062	7.10159e-06	0.000439443
Os01g0947000	14.4155	-7.2216	1.61116	-4.48223	7.38678e-06	0.00045381
Os12g0637100	509.795	-1.01755	0.227004	-4.48251	7.37708e-06	0.00045381
Os04g0476400	103.522	1.4089	0.31428	4.48295	7.36184e-06	0.00045381
Os05g0394900	289.623	1.13898	0.254173	4.48113	7.42502e-06	0.00045507
Os12g0556500	109.373	-2.07271	0.462838	-4.47826	7.52535e-06	0.000460121
Os01g0837000	254.64	-1.69688	0.379169	-4.47526	7.63191e-06	0.000464425
Os06g0160700	500.498	1.47425	0.329422	4.47526	7.63187e-06	0.000464425
Os09g0491820	1088.71	1.01647	0.227287	4.4722	7.74192e-06	0.000470006
Os10g0416500	748.918	-5.14325	1.1509	-4.46891	7.86198e-06	0.000476169
Os08g0484200	152.982	-2.01829	0.45183	-4.46691	7.9356e-06	0.000479497
Os01g0699600	31.3609	-6.60479	1.48044	-4.46137	8.14375e-06	0.000489769
Os05g0384300	45.8687	-6.09742	1.36658	-4.46181	8.12696e-06	0.000489769
Os03g0255900	91.453	-3.98832	0.895331	-4.45458	8.40571e-06	0.000504115
Os01g0198000	47.125	1.57134	0.353465	4.44554	8.76719e-06	0.000523585
Os10g0501500	2409.54	-1.26087	0.283664	-4.44495	8.79106e-06	0.000523792
Os01g0892500	24.9528	-3.49166	0.786058	-4.44199	8.91298e-06	0.000529827
Os05g0460000	441.884	1.7291	0.389727	4.43668	9.13568e-06	0.000540563
Os07g0416700	74.0326	-1.45595	0.328812	-4.42791	9.515e-06	0.000560425
Os02g0258800	379.205	2.76475	0.624613	4.42633	9.58492e-06	0.000560685
Os03g0836300	272.321	-2.18248	0.493195	-4.42519	9.63577e-06	0.000562378
Os02g0327500	150.571	-2.22444	0.502933	-4.42294	9.73653e-06	0.000566971
Os02g0240100	77.8869	-3.65652	0.827528	-4.41861	9.93378e-06	0.000576692
Os07g0115500	289.729	3.02136	0.683831	4.41829	9.94839e-06	0.000576692
Os06g0192800	87.6876	-3.02165	0.684765	-4.41268	1.02099e-05	0.000589189
Os04g0380300	660.378	-1.3314	0.30206	-4.40774	1.04453e-05	0.000600079
Os07g0614000	624.837	2.09365	0.474967	4.40799	1.04333e-05	0.000600079
Os04g0679400	1662.71	-1.97626	0.448856	-4.40287	1.06827e-05	0.000612347
Os05g0370700	32.9279	-5.31198	1.20813	-4.39687	1.09822e-05	0.000628114
Os04g0228400	71.7498	2.14923	0.489852	4.3875	1.1466e-05	0.00065143
Os08g0517200	1411.85	-1.31588	0.299893	-4.38782	1.14491e-05	0.00065143
Os03g0320100	343.701	-1.617	0.368669	-4.38605	1.15429e-05	0.000654352
Os05g0421900	529.107	-2.4423	0.55742	-4.38143	1.17902e-05	0.000666902
Os03g0314500	563.683	-2.41433	0.55127	-4.37957	1.18915e-05	0.000671153
Os01g0279400	122.364	1.44593	0.33045	4.37563	1.21081e-05	0.000681876
Os07g0129300	345.129	-6.44879	1.47403	-4.37493	1.21473e-05	0.000682588
Os02g0135200	206.647	-1.88795	0.432111	-4.36912	1.24746e-05	0.00069945
Os08g0478700	3080.13	-1.48534	0.340096	-4.36742	1.25724e-05	0.000703395
Os02g0803600	18.3514	3.33746	0.764955	4.36295	1.28321e-05	0.000714811
Os03g0223100	382.869	1.60299	0.367572	4.36103	1.29453e-05	0.00071956
Os12g0486900	46.378	-2.53982	0.58247	-4.36043	1.29809e-05	0.000719978
Os05g0375400	11450.5	-1.54633	0.355427	-4.35063	1.35749e-05	0.000751301
Os04g0630800	277.023	-1.80208	0.414335	-4.34932	1.36557e-05	0.000754149
Os06g0702000	48.9669	-1.45533	0.335118	-4.34274	1.40718e-05	0.000773799
Os12g0210500	107.83	-3.33979	0.769403	-4.34076	1.41989e-05	0.000777459
Os06g0530600	85.6697	-4.16325	0.959021	-4.34114	1.41743e-05	0.000777459
Os05g0507300	1238.07	-1.28178	0.295347	-4.3399	1.42547e-05	0.000778855
Os02g0632900	50.8845	-2.31488	0.533641	-4.33791	1.43847e-05	0.000784286
Os01g0925100	54.8253	-1.52779	0.353402	-4.3231	1.53853e-05	0.000835295
Os07g0631700	124.623	-3.19199	0.738706	-4.32106	1.55284e-05	0.000837749
Os03g0834050	142.312	-2.14712	0.497412	-4.31659	1.58458e-05	0.000853085
Os06g0651200	108.196	2.80746	0.650701	4.31452	1.59948e-05	0.000859303
Os01g0134700	131.577	-2.72467	0.63191	-4.3118	1.61933e-05	0.000868149
Os10g0114300	237.905	-1.67566	0.388761	-4.31026	1.63062e-05	0.000872384
Os06g0114400	56.8135	2.30926	0.535948	4.30874	1.64189e-05	0.000876584
Os04g0590400	348.233	-1.09828	0.255087	-4.30549	1.66615e-05	0.000885718
Os07g0528200	16.8017	-4.90784	1.14001	-4.30507	1.66934e-05	0.000885718
Os11g0228201	9.72485	-6.28646	1.46191	-4.30018	1.7066e-05	0.000903621
Os09g0272900	2856.22	-1.62976	0.379049	-4.2996	1.71106e-05	0.000904117
Os11g0582100	751.374	-1.492	0.347175	-4.29754	1.72704e-05	0.000910684
Os01g0650200	1370.82	-1.48987	0.346803	-4.296	1.73908e-05	0.000915154
Os07g0691300	431.342	-1.66787	0.388367	-4.29458	1.75023e-05	0.000919137
Os01g0214200	411.959	-1.1256	0.262305	-4.29121	1.77701e-05	0.000926833
Os11g0547000	428.529	1.18469	0.27604	4.29173	1.77283e-05	0.000926833
Os12g0628100	675.8	1.02534	0.238955	4.29092	1.77932e-05	0.000926833
Os08g0148267	145.204	1.45564	0.339491	4.28773	1.8051e-05	0.000938358
Os06g0109300	138.723	-1.44475	0.337679	-4.27849	1.88165e-05	0.00097421
Os11g0569500	93.1436	-2.47399	0.578435	-4.27704	1.89396e-05	0.000978609
Os04g0584600	2727.83	-1.08338	0.253862	-4.26759	1.97599e-05	0.0010169
Os10g0531400	47.0736	-1.86115	0.43642	-4.26458	2.00283e-05	0.00102455
Os11g0427700	3.1505	16.9708	3.97934	4.26472	2.0015e-05	0.00102455
Os03g0195300	122.654	1.96389	0.460442	4.26523	1.99698e-05	0.00102455
Os01g0217500	93.0542	-2.23724	0.524751	-4.26342	2.01318e-05	0.0010278
Os03g0660400	11.4774	-6.61857	1.55258	-4.26294	2.01756e-05	0.00102799
Os03g0244700	98.8659	-1.52041	0.356979	-4.25911	2.05241e-05	0.00104368
Os08g0203600	1824.59	-1.49315	0.350691	-4.25772	2.06521e-05	0.00104812
Os01g0826400	318.287	-2.84068	0.667449	-4.25602	2.08099e-05	0.00105241
Os10g0504200	65.5484	-1.59709	0.375262	-4.25592	2.08187e-05	0.00105241
Os09g0561500	14.3422	-3.10943	0.731144	-4.25283	2.11089e-05	0.00106499
Os02g0763900	447.68	-1.16577	0.274241	-4.2509	2.12916e-05	0.00107
Os03g0560050	20.9713	-2.81898	0.663569	-4.24821	2.1549e-05	0.00108081
Os03g0604566	274.914	2.16319	0.50953	4.24546	2.18145e-05	0.00109102
Os01g0745000	16.1866	-5.39343	1.27065	-4.24463	2.18954e-05	0.00109179
Os04g0128700	27.1089	-3.79656	0.894715	-4.24331	2.20243e-05	0.00109609
Os01g0175100	488.369	-1.96352	0.462896	-4.24181	2.21727e-05	0.00110134
Os08g0137800	19.1018	-5.4895	1.29433	-4.24119	2.22342e-05	0.00110226
Os12g0515500	277.336	1.19998	0.283119	4.23845	2.25068e-05	0.00111363
Os01g0905200	306.525	-1.99208	0.470115	-4.23744	2.26084e-05	0.00111651
Os04g0647800	1087.29	-1.07193	0.253321	-4.23152	2.32118e-05	0.00114411
Os01g0711000	120.265	1.27366	0.301082	4.23029	2.33392e-05	0.00114598
Os03g0225700	318.756	-1.41728	0.335022	-4.2304	2.33271e-05	0.00114598
Os01g0859200	2004.4	-1.317	0.311472	-4.22831	2.35456e-05	0.00115157
Os11g0227200	131.467	-2.14132	0.506405	-4.22848	2.3528e-05	0.00115157
Os12g0432600	14.936	-6.24055	1.47604	-4.22791	2.35875e-05	0.00115157
Os02g0625300	1121.3	1.12177	0.266077	4.21596	2.48713e-05	0.00120965
Os02g0282000	44.9976	-2.29948	0.545535	-4.2151	2.49671e-05	0.00121201
Os04g0486950	1093.14	-2.99848	0.711944	-4.21168	2.53481e-05	0.00122819
Os08g0203100	170.907	-5.10152	1.21157	-4.21068	2.54607e-05	0.00122993
Os11g0525700	169.927	1.42048	0.337489	4.20896	2.56544e-05	0.00123372
Os11g0609500	9.52846	-6.32243	1.50321	-4.20597	2.59967e-05	0.00124784
Os06g0110200	11.44	6.20465	1.47547	4.2052	2.60856e-05	0.00124977
Os03g0848700	902.379	-1.40993	0.335374	-4.20406	2.6217e-05	0.0012514
Os04g0429600	24.3046	5.02458	1.19507	4.20443	2.61737e-05	0.0012514
Os01g0192300	642.523	1.06244	0.252789	4.20287	2.63549e-05	0.00125565
Os04g0387000	84.7383	-2.36631	0.563531	-4.19908	2.68002e-05	0.00127214
Os01g0365000	26.2949	-3.58145	0.853868	-4.19438	2.73618e-05	0.00129401
Os03g0657400	28.5965	-2.4028	0.572812	-4.19475	2.73176e-05	0.00129401
Os08g0539700	430.024	-2.32172	0.553653	-4.19346	2.74732e-05	0.00129689
Os01g0864200	82.1784	-3.88444	0.928462	-4.18373	2.86762e-05	0.00134873
Os07g0127500	6.55925	-6.12524	1.46395	-4.18405	2.86362e-05	0.00134873
Os04g0480200	61.0511	-3.31131	0.792455	-4.17855	2.93377e-05	0.00137412
Os04g0525200	114.771	-2.47397	0.592465	-4.17572	2.97039e-05	0.0013869
Os08g0509100	505.585	-2.28654	0.547745	-4.17446	2.98691e-05	0.00139209
Os04g0683700	22009.5	-1.31198	0.314676	-4.16931	3.05528e-05	0.00142137
Os11g0454200	117.173	6.30477	1.51301	4.16703	3.08592e-05	0.00143272
Os12g0277000	301.494	-1.36226	0.326941	-4.16667	3.09083e-05	0.00143272
Os10g0419400	76.9527	-2.0857	0.50085	-4.16431	3.12291e-05	0.00144498
Os04g0496150	45.8945	-1.70867	0.410528	-4.16212	3.1531e-05	0.00145632
Os01g0389200	16.0938	-6.77464	1.62809	-4.1611	3.1672e-05	0.00146021
Os03g0382100	1561.04	-1.4441	0.347562	-4.15493	3.25384e-05	0.00149746
Os09g0571200	264.485	-2.60843	0.62798	-4.15368	3.27164e-05	0.0015026
Os02g0813600	151.282	-2.00861	0.483953	-4.15042	3.31861e-05	0.00151911
Os03g0801900	205.338	-1.37758	0.332528	-4.14274	3.43178e-05	0.00156533
Os06g0232100	1267.38	-1.3698	0.330643	-4.14282	3.43056e-05	0.00156533
Os09g0438100	831.576	2.00526	0.48414	4.14189	3.44457e-05	0.0015656
Os02g0712600	35.7585	-3.95533	0.956307	-4.13605	3.53336e-05	0.00160312
Os01g0185900	21.4474	-2.7496	0.665009	-4.13468	3.55445e-05	0.00160984
Os01g0392600	135.185	-1.57724	0.381524	-4.13405	3.56433e-05	0.00161148
Os12g0538600	57.8762	4.14545	1.00464	4.1263	3.6864e-05	0.00165501
Os03g0854000	618.605	-1.26894	0.307523	-4.12633	3.68604e-05	0.00165501
Os02g0570400	206.477	-3.52074	0.854042	-4.12244	3.74876e-05	0.00167715
Os05g0395000	2759.32	1.04356	0.253375	4.11865	3.81102e-05	0.00170101
Os07g0686300	240.543	-2.37113	0.575778	-4.11814	3.8194e-05	0.00170101
Os03g0228200	1192.21	1.70904	0.415086	4.11731	3.83328e-05	0.00170309
Os02g0569900	83.8643	-4.21716	1.0248	-4.11509	3.87025e-05	0.00171655
Os11g0303800	142.762	3.4459	0.838227	4.11094	3.9405e-05	0.00174469
Os03g0691800	150.076	-1.45388	0.354079	-4.10608	4.02434e-05	0.00177264
Os06g0487620	68.4578	-1.64018	0.399864	-4.10184	4.09873e-05	0.00180232
Os01g0850550	35.6005	-4.12165	1.00524	-4.10015	4.12877e-05	0.00181242
Os08g0189900	32.1641	-4.35444	1.06257	-4.09802	4.16708e-05	0.00182612
Os01g0731100	441.747	-2.75365	0.672337	-4.09564	4.21005e-05	0.00184181
Os01g0613800	52.1502	-3.14403	0.768017	-4.09369	4.24555e-05	0.00185103
Os03g0805400	360.828	-1.19066	0.290839	-4.09387	4.24236e-05	0.00185103
Os11g0226966	113.427	-3.32954	0.814538	-4.08765	4.35768e-05	0.00189627
Os07g0100800	202.873	1.35425	0.33133	4.08731	4.36408e-05	0.00189627
Os02g0669366	58.1736	-2.57666	0.63065	-4.08573	4.39394e-05	0.00190602
Os01g0949300	1050.57	-2.11214	0.517296	-4.08304	4.44512e-05	0.00192497
Os10g0456000	23.7044	-2.19535	0.537766	-4.08235	4.45822e-05	0.001926
Os08g0138900	2894.91	1.48542	0.363883	4.08213	4.46251e-05	0.001926
Os04g0173300	1213.85	-1.19558	0.29302	-4.08019	4.49982e-05	0.00193885
Os02g0134400	197.305	-1.42947	0.350557	-4.07771	4.54813e-05	0.00195638
Os08g0462900	73.8679	1.59545	0.391802	4.07208	4.65952e-05	0.00200094
Os06g0558300	152.179	-2.26317	0.55629	-4.06832	4.73527e-05	0.0020267
Os05g0140300	88.317	1.2893	0.317434	4.06164	4.8729e-05	0.00207523
Os10g0578800	2815.91	-1.52965	0.377237	-4.05487	5.01625e-05	0.00212921
Os09g0572000	22.5263	-3.29242	0.812774	-4.05084	5.1034e-05	0.00216263
Os02g0251800	23.2151	-3.64767	0.901377	-4.04678	5.19275e-05	0.00219489
Os08g0482600	308.497	-3.6415	0.901369	-4.03996	5.34604e-05	0.00224691
Os02g0261400	19.4275	-3.22183	0.797721	-4.03879	5.37272e-05	0.00225443
Os03g0733200	52.015	2.18081	0.540825	4.03238	5.52142e-05	0.00230929
Os11g0586300	112.844	1.15937	0.287801	4.02838	5.61618e-05	0.0023451
Os04g0423100	502.211	1.33637	0.331833	4.02723	5.64372e-05	0.00234896
Os07g0663800	1905.14	-1.46416	0.363542	-4.02748	5.63768e-05	0.00234896
Os08g0174300	93.6307	2.61123	0.648929	4.02391	5.72403e-05	0.00237853
Os06g0128800	50.3524	-3.73423	0.929699	-4.0166	5.90451e-05	0.00244561
Os03g0238800	648.459	1.14436	0.285126	4.01351	5.98221e-05	0.0024738
Os10g0562900	52.4892	-3.37217	0.841246	-4.00855	6.10931e-05	0.0025223
Os12g0280801	236.234	-1.03607	0.258731	-4.00444	6.21648e-05	0.00256243
Os06g0351500	565.053	1.32409	0.331129	3.99872	6.36857e-05	0.00261254
Os03g0727600	27.4051	-2.24802	0.562498	-3.9965	6.42857e-05	0.00263295
Os03g0269900	379.379	1.06326	0.266282	3.99298	6.5249e-05	0.00266814
Os10g0559200	80.1713	1.73464	0.434778	3.98971	6.6153e-05	0.00270081
Os06g0129100	143.315	-1.64425	0.412171	-3.98924	6.6285e-05	0.0027019
Os07g0114000	168.625	-1.57687	0.395339	-3.98865	6.64503e-05	0.00270435
Os03g0830400	21.2483	-3.79237	0.951663	-3.98499	6.74823e-05	0.002742
Os04g0542200	277.807	1.762	0.442219	3.98445	6.76356e-05	0.00274389
Os05g0324700	56.0462	-3.6538	0.917121	-3.98399	6.7768e-05	0.00274492
Os02g0738200	29.7541	-4.20418	1.05756	-3.97537	7.027e-05	0.00283286
Os08g0331000	36.1203	-3.58391	0.90199	-3.97333	7.08736e-05	0.00285272
Os10g0490100	61.6113	-3.00783	0.757078	-3.97294	7.09899e-05	0.00285293
Os01g0706900	222.928	1.3487	0.339683	3.97046	7.17341e-05	0.00287833
Os02g0805100	24.7993	-2.44551	0.616117	-3.96923	7.21045e-05	0.00288868
Os06g0161400	7.03392	5.70656	1.44037	3.96188	7.43628e-05	0.00297451
Os05g0550800	50.1501	-1.39085	0.351091	-3.9615	7.44795e-05	0.00297455
Os02g0176000	676.846	-2.30035	0.580814	-3.96056	7.47748e-05	0.0029817
Os03g0743500	226.197	-1.78903	0.45209	-3.95725	7.58191e-05	0.00301866
Os05g0287800	561.556	-1.29554	0.327532	-3.95547	7.63836e-05	0.00303643
Os01g0947700	255.561	-1.37577	0.348134	-3.95186	7.75468e-05	0.0030637
Os12g0123200	171.268	-1.23477	0.312617	-3.94978	7.82233e-05	0.00307152
Os04g0179700	69.0294	-8.57139	2.16992	-3.95009	7.81216e-05	0.00307152
Os09g0519150	160.043	1.35069	0.341933	3.95015	7.81017e-05	0.00307152
Os06g0301400	86.708	1.40398	0.355944	3.94439	8.00042e-05	0.00313665
Os08g0458200	116.311	1.7236	0.437685	3.938	8.21651e-05	0.00320669
Os07g0575500	42.0387	1.58285	0.403138	3.92631	8.62588e-05	0.00335625
Os07g0448100	17.4769	4.67331	1.19061	3.92514	8.66786e-05	0.00336748
Os03g0133800	102.657	-1.03619	0.264038	-3.9244	8.69449e-05	0.00337273
Os11g0454000	39.3161	5.64144	1.43769	3.92398	8.70993e-05	0.00337362
Os04g0178300	246.11	-8.43706	2.1508	-3.92275	8.75448e-05	0.00338577
Os01g0388000	237.961	-1.37383	0.350623	-3.91826	8.91904e-05	0.00343905
Os09g0351700	196.991	-1.71665	0.438956	-3.91076	9.20047e-05	0.00354177
Os09g0417600	112.352	-2.93708	0.751089	-3.91043	9.21303e-05	0.00354177
Os01g0546400	34.8544	2.00505	0.513573	3.90412	9.45676e-05	0.00361922
Os11g0603000	6.04931	-6.07539	1.55611	-3.90421	9.45355e-05	0.00361922
Os08g0202200	29.9534	-2.60333	0.666991	-3.9031	9.49688e-05	0.00362916
Os12g0211900	10.3477	-5.83667	1.49991	-3.89135	9.96885e-05	0.00378698
Os08g0247600	258.146	1.74051	0.447254	3.89155	9.96045e-05	0.00378698
Os08g0457400	56.4399	-1.90935	0.490779	-3.89045	0.000100057	0.00379536
Os12g0242500	212.054	1.33568	0.343388	3.88971	0.000100364	0.0038014
Os05g0535566	40.6316	1.51615	0.390082	3.88675	0.000101593	0.0038423
Os08g0526400	521.592	-1.40158	0.360992	-3.88258	0.000103356	0.0039032
Os05g0161500	5989.15	1.6279	0.419986	3.87609	0.000106147	0.00400273
Os10g0521000	69.5065	2.28741	0.591017	3.87029	0.000108704	0.00409313
Os01g0298400	9.21489	-5.72997	1.48121	-3.86843	0.000109537	0.00411846
Os05g0202800	425.515	3.45681	0.893811	3.8675	0.000109957	0.00412821
Os07g0587500	223.632	-1.0398	0.269001	-3.86543	0.000110895	0.00415127
Os11g0549469	9.33026	-4.25865	1.10197	-3.8646	0.000111273	0.00415765
Os05g0398000	282.033	-1.05442	0.273034	-3.86188	0.00011252	0.00419377
Os05g0488600	266.839	1.38262	0.35807	3.8613	0.000112783	0.00419749
Os11g0482200	21.3636	-3.90712	1.01302	-3.8569	0.000114836	0.00426155
Os06g0520733	48.0778	2.09827	0.544124	3.85623	0.000115148	0.00426695
Os07g0542400	2445.88	-2.99893	0.777757	-3.85587	0.00011532	0.00426716
Os03g0319400	1872.14	1.05696	0.274347	3.85265	0.000116846	0.00431742
Os12g0221400	25.644	-3.38943	0.879873	-3.85218	0.000117072	0.00431956
Os12g0638200	478.736	1.01235	0.262873	3.85111	0.000117582	0.00433215
Os05g0495600	493.49	-1.79445	0.466442	-3.8471	0.000119525	0.00439742
Os04g0244800	2345.26	1.64519	0.428034	3.84359	0.000121246	0.00444618
Os07g0650600	2748.23	-1.02515	0.266734	-3.84334	0.00012137	0.00444618
Os02g0437300	1022.61	-1.24392	0.323776	-3.84193	0.000122068	0.00445906
Os09g0342000	33.4601	-2.16945	0.564664	-3.84203	0.000122022	0.00445906
Os04g0556400	111.27	-3.26731	0.850963	-3.83954	0.000123263	0.0044963
Os01g0648600	53.2271	-2.02846	0.528712	-3.83661	0.000124743	0.00453738
Os03g0285800	315.678	-1.7865	0.465936	-3.83422	0.000125962	0.00456877
Os02g0703300	294.012	-1.04288	0.272072	-3.83309	0.000126544	0.00458343
Os04g0517100	211.735	-1.86988	0.487946	-3.83213	0.000127037	0.0045948
Os08g0192300	29.8575	2.63914	0.68999	3.8249	0.000130825	0.00471851
Os02g0181300	845.047	-2.03975	0.533718	-3.82178	0.000132494	0.00477201
Os01g0297200	23.6744	-2.7795	0.728176	-3.81706	0.000135049	0.00485042
Os03g0411600	142.186	-1.06082	0.278302	-3.81174	0.000137989	0.00493533
Os09g0271100	971.531	-1.51441	0.397283	-3.81193	0.000137886	0.00493533
Os01g0888900	184.989	-1.44593	0.379852	-3.80655	0.000140918	0.00503306
Os05g0201700	387.194	-1.6103	0.423095	-3.80599	0.000141236	0.00503742
Os10g0536100	921.412	-1.2388	0.325951	-3.80056	0.000144367	0.00513483
Os12g0628600	1232.17	-2.55175	0.672775	-3.79288	0.000148911	0.00528592
Os03g0772600	614.437	-1.54816	0.408196	-3.79269	0.000149027	0.00528592
Os11g0670900	103.403	1.93034	0.509171	3.79114	0.000149957	0.00531158
Os05g0439400	1519.78	-1.47314	0.389291	-3.78415	0.000154235	0.00544809
Os03g0650200	316.068	1.69862	0.448978	3.78331	0.00015476	0.0054591
Os03g0400700	90.4902	-1.59728	0.422469	-3.78082	0.000156315	0.00549135
Os08g0547300	132.013	1.23894	0.327663	3.78114	0.00015611	0.00549135
Os01g0384800	391.19	-2.07317	0.549221	-3.77475	0.000160168	0.00561899
Os10g0347800	72.858	1.35708	0.359934	3.77037	0.000163008	0.00570305
Os08g0412800	49.4732	3.2341	0.85771	3.77062	0.000162842	0.00570305
Os04g0569000	83.2181	1.28889	0.342449	3.76373	0.000167397	0.00584069
Os07g0106200	1513.26	-1.68161	0.446999	-3.76199	0.000168564	0.00586547
Os01g0741900	638.528	-1.49331	0.397283	-3.75881	0.000170724	0.0059326
Os03g0223400	1099.93	-1.03787	0.276341	-3.75578	0.000172805	0.0059968
Os01g0930800	1547.4	1.16581	0.310437	3.75538	0.000173077	0.00599814
Os01g0238500	11867	1.0677	0.284484	3.75311	0.000174653	0.00604459
Os01g0232000	89.9883	1.73079	0.46282	3.73966	0.000184271	0.00636031
Os01g0690800	130.489	-1.69579	0.453573	-3.73873	0.00018495	0.00637519
Os01g0227500	582.943	1.0539	0.282557	3.72987	0.000191576	0.00659064
Os08g0526633	75.7304	-1.73847	0.466115	-3.72969	0.000191714	0.00659064
Os03g0103300	382.435	-1.216	0.326299	-3.72665	0.000194045	0.00666185
Os10g0535600	99.6131	-1.90326	0.510832	-3.72581	0.00019469	0.00667509
Os01g0701700	48.1807	-2.22703	0.5979	-3.72476	0.000195502	0.006694
Os10g0190500	105.025	1.07252	0.288055	3.72333	0.000196611	0.00670516
Os02g0667500	208.794	1.22028	0.327735	3.72336	0.000196586	0.00670516
Os05g0572000	29.683	1.95883	0.527512	3.71333	0.00020455	0.00696662
Os02g0251900	21.4348	-6.11248	1.64671	-3.71194	0.000205676	0.00699571
Os05g0116100	1215.73	1.20396	0.324391	3.71146	0.000206069	0.00699979
Os09g0541000	1963.02	1.27804	0.344798	3.70664	0.000210026	0.00712478
Os07g0585900	35.1285	-2.1347	0.576126	-3.70526	0.000211178	0.00715441
Os09g0520500	30.5693	2.10224	0.567787	3.70251	0.000213476	0.00722273
Os10g0465700	482.766	1.41303	0.382076	3.6983	0.000217046	0.00733388
Os10g0109600	76.1275	-3.43168	0.928241	-3.69697	0.00021819	0.00735208
Os04g0444300	70.5642	-3.09725	0.837848	-3.69667	0.000218444	0.00735208
Os01g0826000	71.9622	2.01148	0.54431	3.69546	0.000219486	0.00737749
Os07g0178700	606.249	1.64394	0.444965	3.69454	0.000220282	0.00739457
Os07g0690900	79.6182	-1.76233	0.477495	-3.69078	0.000223566	0.00748522
Os08g0423600	25.5081	-6.19249	1.67824	-3.68987	0.000224371	0.0075024
Os10g0578200	30.7932	-1.99891	0.54231	-3.68593	0.000227872	0.00758981
Os08g0140300	85.2153	-4.1092	1.11527	-3.68447	0.000229175	0.00762332
Os04g0684100	378.057	-1.29138	0.350573	-3.68362	0.000229943	0.00763899
Os11g0567600	49.67	-2.15698	0.585924	-3.68133	0.000232024	0.00768033
Os12g0471100	34.8552	-3.71955	1.01029	-3.68166	0.000231718	0.00768033
Os08g0161500	140.095	1.18327	0.321431	3.68126	0.000232085	0.00768033
Os03g0757000	622.414	-2.14317	0.582557	-3.6789	0.000234244	0.0077418
Os01g0931000	91.5177	1.89991	0.516788	3.67639	0.00023656	0.00780831
Os02g0701900	157.351	-1.01296	0.275631	-3.67504	0.000237811	0.00783951
Os03g0310600	18.3108	-3.12981	0.851921	-3.67383	0.000238943	0.00786261
Os04g0387300	15.6778	-3.09211	0.841703	-3.67364	0.000239124	0.00786261
Os02g0156600	24.2653	-1.76662	0.481175	-3.67148	0.000241151	0.007909
Os09g0509700	153.796	1.33796	0.364488	3.67078	0.000241807	0.0079204
Os02g0768300	132.093	-3.2437	0.884436	-3.66754	0.000244899	0.00800126
Os03g0122300	286.069	-1.51899	0.414166	-3.66758	0.000244858	0.00800126
Os12g0261300	71.4523	1.59917	0.436092	3.66705	0.000245366	0.00800636
Os06g0289900	2966.83	1.58758	0.433373	3.6633	0.000248986	0.00811416
Os10g0109300	5058.4	-1.10296	0.301143	-3.66259	0.000249676	0.00812633
Os04g0525100	213.21	-1.64128	0.448678	-3.65803	0.000254158	0.00826174
Os09g0334500	1132.95	-1.21618	0.333309	-3.64881	0.000263457	0.00855319
Os12g0566000	153.997	1.54845	0.424768	3.6454	0.000266976	0.0086565
Os12g0629700	34.6679	-3.83656	1.05312	-3.64303	0.000269448	0.00872563
Os06g0640599	31.4453	3.58193	0.983355	3.64256	0.000269943	0.00873065
Os04g0511200	253.093	2.54473	0.699573	3.63755	0.000275243	0.0088797
Os06g0524400	238.858	1.51848	0.417437	3.63762	0.000275167	0.0088797
Os11g0156300	102.868	-1.059	0.291329	-3.63506	0.00027792	0.00895481
Os09g0380501	6.61039	-4.08344	1.12406	-3.63275	0.000280412	0.00901248
Os08g0189600	20.9131	-3.3864	0.932696	-3.63076	0.000282586	0.00903713
Os03g0305600	124.391	3.40803	0.938893	3.62984	0.000283601	0.00905418
Os01g0899200	213.495	1.46051	0.40277	3.62617	0.000287654	0.00916191
Os01g0648000	29.8323	-1.87461	0.517839	-3.62006	0.000294535	0.00936097
Os03g0666300	8.93483	5.59696	1.54624	3.61973	0.00029491	0.0093613
Os07g0124100	307.691	-1.21719	0.336779	-3.61421	0.000301261	0.00953932
Os04g0506800	32.6917	-4.07788	1.12961	-3.60998	0.000306219	0.00967244
Os07g0147500	8785.94	-1.53885	0.426589	-3.60734	0.000309351	0.00975936
Os09g0522200	150.846	-2.87101	0.796335	-3.60528	0.000311815	0.00982503
Os03g0371400	270.591	2.37512	0.658945	3.60442	0.000312845	0.00984541
Os02g0706600	145.585	1.04298	0.289662	3.60069	0.000317372	0.00996437
Os06g0662200	151.709	-1.37419	0.381832	-3.59894	0.000319511	0.0100062
Os07g0142802	50.5283	1.75353	0.487221	3.59904	0.00031939	0.0100062
Os01g0555100	139.203	-2.03483	0.565608	-3.59759	0.000321179	0.0100461
Os10g0552600	49.8559	-2.39183	0.665633	-3.59331	0.000326506	0.0102003
Os04g0634800	151.129	-2.27633	0.634538	-3.58739	0.00033401	0.0103842
Os06g0202300	142.359	-1.65234	0.461285	-3.58204	0.000340925	0.010581
Os05g0381400	30.1681	2.97483	0.830888	3.5803	0.000343199	0.0106313
Os08g0425800	1400.7	1.35023	0.377286	3.5788	0.000345176	0.0106797
Os05g0487300	116.559	1.05331	0.294407	3.57774	0.000346579	0.0107102
Os04g0282400	1747.47	1.71716	0.480225	3.57574	0.000349235	0.0107793
Os01g0974200	6311.56	1.15566	0.323338	3.57415	0.000351367	0.0108321
Os02g0207100	39.6886	2.08542	0.584045	3.57065	0.000356102	0.0109386
Os01g0597600	154.641	-6.73398	1.8868	-3.569	0.000358348	0.0109796
Os12g0527700	112.189	-1.11551	0.31258	-3.56873	0.00035872	0.0109796
Os07g0509800	3508.09	1.18897	0.333137	3.569	0.000358349	0.0109796
Os04g0569100	74.1369	1.65706	0.464426	3.56798	0.000359746	0.0109849
Os01g0757900	62.4888	-1.58639	0.445179	-3.56349	0.000365963	0.0111482
Os03g0804500	261.512	-1.63165	0.457867	-3.56359	0.000365815	0.0111482
Os02g0736900	38.8354	-3.85736	1.08259	-3.56308	0.000366522	0.011152
Os05g0576600	172.89	-2.06482	0.579847	-3.56097	0.000369482	0.0112287
Os08g0124500	7.60884	-5.00365	1.40576	-3.5594	0.000371701	0.0112828
Os02g0275200	742.36	-1.37402	0.386075	-3.55894	0.000372351	0.0112892
Os10g0568200	129.393	-1.62543	0.457966	-3.54924	0.000386339	0.011672
Os07g0417200	8.87622	-5.43848	1.5325	-3.54876	0.000387057	0.0116799
Os06g0223700	214.904	1.26836	0.357546	3.54741	0.000389043	0.0117261
Os06g0335900	27.5612	-2.28796	0.645352	-3.54529	0.000392175	0.0118066
Os07g0677100	113.715	-2.89986	0.818136	-3.54447	0.000393401	0.0118297
Os02g0483500	502.993	-1.28769	0.363491	-3.54257	0.000396252	0.0119015
Os11g0136400	12.2445	3.93876	1.11335	3.53774	0.000403572	0.0121072
Os04g0634700	105.42	-1.47207	0.416272	-3.53632	0.000405736	0.0121522
Os06g0493600	119.652	-1.54511	0.436949	-3.53614	0.000406026	0.0121522
Os07g0570100	460.538	-1.09907	0.310838	-3.53583	0.000406492	0.0121522
Os09g0511200	24.2821	2.69466	0.762323	3.5348	0.000408084	0.0121856
Os05g0537400	406.079	1.36535	0.386379	3.5337	0.000409781	0.012222
Os12g0555000	575.825	-4.25411	1.20454	-3.53174	0.000412831	0.0122987
Os01g0604500	170.913	-1.23655	0.351412	-3.51881	0.000433488	0.0128693
Os04g0127200	1068.21	-1.26245	0.358925	-3.51731	0.000435947	0.0129274
Os11g0608300	7.28286	-5.4866	1.56025	-3.51648	0.000437307	0.0129528
Os04g0682100	207.736	-1.3548	0.385434	-3.51501	0.000439744	0.012995
Os05g0542500	628.02	5.35124	1.5232	3.51316	0.000442809	0.0130705
Os05g0499800	239.729	1.07682	0.307041	3.50709	0.000453031	0.0133416
Os08g0138200	4.55802	-5.64711	1.6119	-3.50339	0.00045938	0.013513
Os01g0947833	27.5043	-2.31022	0.659782	-3.50149	0.00046266	0.0135784
Os11g0227100	31.1159	-1.56524	0.447248	-3.4997	0.000465774	0.0136542
Os03g0718800	133.737	1.67322	0.479198	3.4917	0.000479951	0.0139425
Os06g0335975	23.9739	-2.71304	0.77738	-3.48998	0.000483061	0.014017
Os02g0503900	209.034	1.86206	0.533636	3.48938	0.000484148	0.0140326
Os11g0681400	55.456	-2.13251	0.611633	-3.48658	0.00048924	0.0141643
Os12g0555200	409.375	-3.70103	1.06218	-3.48437	0.000493302	0.0142497
Os05g0468800	77.0416	4.10421	1.17787	3.48442	0.000493203	0.0142497
Os12g0222300	172.946	-3.37363	0.968374	-3.48381	0.000494334	0.0142635
Os11g0626700	1089.06	-1.37939	0.396018	-3.48316	0.000495539	0.0142662
Os12g0632800	956.179	-1.46374	0.420334	-3.48232	0.000497095	0.014279
Os01g0196300	28.6115	-3.68197	1.05766	-3.48123	0.000499115	0.0142891
Os01g0742400	181.713	-2.00536	0.576287	-3.47979	0.000501811	0.0143086
Os11g0289700	2775.8	1.08517	0.311807	3.48027	0.0005009	0.0143086
Os12g0427600	12.3744	6.49211	1.86572	3.47967	0.000502025	0.0143086
Os02g0228300	1013.47	-1.27373	0.365998	-3.48015	0.000501129	0.0143086
Os04g0450400	211.593	-1.6831	0.48404	-3.47719	0.000506699	0.0143779
Os06g0640100	127.82	1.41901	0.408071	3.47735	0.0005064	0.0143779
Os05g0438800	601.145	1.05854	0.304602	3.47516	0.000510554	0.0144713
Os10g0389300	120.83	2.38705	0.687532	3.47191	0.000516769	0.0146313
Os01g0213400	140.741	-2.33365	0.672263	-3.47133	0.000517878	0.0146466
Os10g0162842	38.7578	-2.90139	0.836087	-3.4702	0.000520062	0.0146542
Os11g0454300	1010.55	4.76873	1.37416	3.47029	0.000519899	0.0146542
Os11g0598500	83.9821	-2.8536	0.82315	-3.46669	0.000526916	0.0148171
Os08g0416000	3484.51	-1.08818	0.313917	-3.46646	0.00052737	0.0148171
Os07g0678300	1020.88	1.19673	0.345283	3.46593	0.000528395	0.0148297
Os10g0132300	149.443	-1.28662	0.371753	-3.46096	0.000538244	0.0150732
Os07g0540600	12.4657	-3.70053	1.06974	-3.45928	0.000541612	0.015151
Os05g0278500	101.529	-1.43559	0.415299	-3.45675	0.000546733	0.0152776
Os01g0856000	117.826	1.08577	0.314135	3.45637	0.000547506	0.0152825
Os07g0251900	8.75941	-5.73239	1.65994	-3.45338	0.000553614	0.0154363
Os08g0260800	4.3312	-5.91305	1.71637	-3.4451	0.000570853	0.0158639
Os02g0717600	179.798	-1.22536	0.355765	-3.44429	0.000572564	0.0158784
Os03g0197100	415.395	1.28414	0.373095	3.44186	0.000577722	0.0160042
Os01g0638600	55.0766	1.94633	0.565543	3.44152	0.000578445	0.0160046
Os05g0489200	1343.28	1.1067	0.321596	3.44127	0.000578984	0.0160046
Os05g0542732	202.324	-1.53628	0.44683	-3.43818	0.000585632	0.016171
Os05g0155200	110.767	1.11189	0.323459	3.43749	0.000587122	0.0161947
Os03g0270000	487.685	-1.49499	0.435286	-3.4345	0.000593654	0.0163573
Os09g0472900	106.019	-2.69074	0.783732	-3.43324	0.000596407	0.0164057
Os11g0428500	25.7614	1.75641	0.511659	3.43278	0.000597426	0.0164084
Os04g0540200	253.343	-1.11134	0.324179	-3.42816	0.000607677	0.0166366
Os10g0127900	259.502	-1.4256	0.415942	-3.42739	0.000609405	0.0166662
Os02g0827900	532.045	-1.13561	0.331489	-3.42579	0.000613008	0.0167469
Os11g0559600	124.542	-2.08588	0.609084	-3.42462	0.000615654	0.0168013
Os08g0201600	7.35971	-4.74066	1.38469	-3.42363	0.000617917	0.0168451
Os01g0825800	335.173	-1.25048	0.365468	-3.42159	0.000622558	0.0169357
Os11g0705200	337.735	-1.46269	0.427621	-3.42053	0.000624998	0.0169682
Os05g0207400	73.6156	-1.14609	0.335093	-3.42021	0.000625737	0.0169682
Os10g0180800	1130.03	-1.65057	0.482871	-3.41824	0.00063027	0.0170731
Os11g0459600	108.881	-1.36045	0.398331	-3.41537	0.00063695	0.0172359
Os04g0630400	338.166	1.27739	0.374328	3.41248	0.000643738	0.0173898
Os07g0283125	43.9756	1.89088	0.554171	3.41209	0.00064467	0.0173898
Os07g0632000	65.8796	-1.65547	0.485153	-3.41226	0.000644262	0.0173898
Os01g0127900	75.2009	-1.40522	0.412167	-3.40935	0.000651189	0.0175289
Os09g0274900	1148.98	-1.35541	0.397774	-3.40748	0.000655656	0.0176122
Os04g0667600	549.888	-1.30492	0.383001	-3.40709	0.000656596	0.017619
Os11g0208900	696.377	1.14184	0.335784	3.40054	0.000672538	0.018028
Os09g0115900	691.917	-1.46607	0.43127	-3.39944	0.000675252	0.018063
Os12g0170800	40.1289	-3.08736	0.908967	-3.39656	0.000682392	0.0181782
Os05g0395116	41.4328	1.71919	0.506994	3.39095	0.000696504	0.0184966
Os07g0123800	57.7876	-2.44607	0.721484	-3.39033	0.000698097	0.0185198
Os03g0860100	3.82273	-5.73816	1.69289	-3.38955	0.000700066	0.0185528
Os01g0628700	1618.9	-1.04442	0.308264	-3.38809	0.000703818	0.0186138
Os01g0229600	570.418	1.49046	0.440245	3.38551	0.000710452	0.0187507
Os04g0400700	26.7517	-3.91217	1.15554	-3.38557	0.000710296	0.0187507
Os01g0609900	446.339	-1.51236	0.447132	-3.38236	0.000718649	0.0189281
Os06g0172800	239.295	-1.16143	0.343548	-3.38068	0.000723056	0.0190247
Os08g0185900	27.3143	-2.15649	0.638035	-3.37989	0.000725141	0.01906
Os08g0374000	205.983	1.65946	0.491183	3.37849	0.000728845	0.0191378
Os01g0934100	802.755	-1.12483	0.333307	-3.37476	0.000738793	0.0193397
Os02g0631100	8.39637	-3.29976	0.977697	-3.37504	0.000738059	0.0193397
Os08g0351300	207.269	-2.69539	0.798852	-3.37408	0.000740636	0.0193682
Os06g0181700	2.2905	17.2007	5.10105	3.37199	0.000746273	0.0194759
Os06g0207950	10.328	-6.18084	1.83298	-3.37202	0.000746198	0.0194759
Os03g0261100	734.654	1.06868	0.317277	3.3683	0.000756336	0.0196791
Os05g0457200	33.6401	1.77234	0.526245	3.3679	0.000757423	0.0196837
Os08g0485800	56.1596	-2.17281	0.645196	-3.36767	0.000758066	0.0196837
Os03g0183200	59.9244	-2.16113	0.641858	-3.36699	0.000759941	0.0197124
Os10g0389100	14.0172	2.68678	0.798692	3.36398	0.00076828	0.0198685
Os05g0111300	2835.44	1.42322	0.42307	3.36402	0.000768154	0.0198685
Os01g0947800	17.8769	-1.81412	0.539536	-3.36237	0.000772772	0.0199646
Os11g0168600	28.1771	-2.54985	0.758716	-3.36075	0.000777311	0.0200617
Os01g0595600	53.9156	1.26198	0.375743	3.35863	0.000783293	0.0201957
Os05g0542300	77.8256	1.23996	0.369663	3.3543	0.000795652	0.0204733
Os04g0121800	174.462	-2.37813	0.709277	-3.35289	0.000799736	0.0205578
Os01g0233900	48.8263	1.45516	0.434185	3.35147	0.000803832	0.0206265
Os06g0652100	10.1886	6.00501	1.79193	3.35113	0.00080482	0.0206265
Os07g0490100	238.62	1.2134	0.362082	3.35117	0.000804708	0.0206265
Os10g0483500	142.659	1.09311	0.326651	3.34641	0.000818642	0.020939
Os05g0181300	23.3716	-2.48055	0.742134	-3.34246	0.000830395	0.0211974
Os06g0224200	148.805	-1.31068	0.392427	-3.33994	0.000837969	0.0213695
Os09g0431100	47.0734	-2.54224	0.761565	-3.33818	0.000843287	0.0214563
Os01g0122000	168.345	1.38519	0.415103	3.33698	0.000846932	0.0215126
Os02g0595300	50.5861	1.00349	0.301096	3.33278	0.000859815	0.0217538
Os03g0679700	3117.94	1.15072	0.345245	3.33305	0.000858988	0.0217538
Os03g0393700	181.506	-1.1348	0.340592	-3.33185	0.000862711	0.0218055
Os11g0526000	49.5693	1.46287	0.439203	3.33073	0.000866193	0.021872
Os06g0557100	722.875	-1.22318	0.367422	-3.32907	0.000871364	0.0219646
Os03g0305400	181.91	-1.46551	0.440616	-3.32606	0.00088084	0.0221547
Os08g0546800	77.0327	1.68327	0.50673	3.32182	0.000894313	0.0224716
Os06g0655500	2932.63	-1.15464	0.348044	-3.31752	0.000908208	0.0227984
Os03g0797400	136.783	1.88443	0.568975	3.31198	0.000926391	0.0232321
Os01g0972200	27.4908	-1.82434	0.551194	-3.3098	0.000933641	0.0233579
Os03g0649000	51.5412	1.04047	0.314373	3.30967	0.00093407	0.0233579
Os02g0504000	1755.15	1.09223	0.330466	3.30512	0.000949352	0.0236693
Os03g0663700	726.744	1.44076	0.436281	3.30236	0.00095875	0.0238804
Os04g0439300	126.407	1.04967	0.317968	3.30116	0.000962847	0.0239592
Os03g0371300	156.064	2.52628	0.765411	3.30056	0.000964925	0.0239877
Os01g0714800	9.79713	-6.55007	1.98583	-3.29841	0.000972346	0.0241488
Os12g0638300	561.164	1.64495	0.49913	3.29564	0.000981975	0.0243644
Os12g0240900	17.759	-4.30728	1.31012	-3.28771	0.00101007	0.025013
Os01g0303800	376.827	-1.51417	0.460818	-3.28583	0.00101683	0.0251562
Os12g0639600	328.593	-1.49345	0.454794	-3.2838	0.00102419	0.0253139
Os01g0594800	23.5092	-3.63406	1.10713	-3.28241	0.00102923	0.025341
Os10g0537800	61.1392	-3.78401	1.15279	-3.2825	0.00102892	0.025341
Os06g0574200	17.0798	-1.87095	0.569952	-3.28264	0.00102839	0.025341
Os06g0129900	2076.51	1.1919	0.363153	3.2821	0.00103036	0.0253446
Os12g0438300	161.471	1.27258	0.38784	3.28121	0.00103363	0.0254006
Os08g0320100	29.7557	1.55084	0.472783	3.28025	0.00103716	0.0254585
Os08g0480200	307.126	-1.04007	0.317099	-3.27995	0.00103825	0.0254585
Os08g0528200	26.3075	-2.29417	0.699495	-3.27976	0.00103896	0.0254585
Os09g0410700	61.8768	1.20496	0.367701	3.27701	0.00104914	0.0256833
Os04g0403400	90.7842	1.04821	0.319961	3.27605	0.00105269	0.0257458
Os12g0518200	7.01227	-5.64745	1.72554	-3.27285	0.00106469	0.0259897
Os11g0678000	218.935	-1.34493	0.411219	-3.2706	0.00107319	0.0261636
Os05g0171900	910.875	-1.85237	0.567107	-3.26636	0.00108941	0.0264673
Os01g0243100	156.505	1.1265	0.34508	3.26447	0.0010967	0.0266193
Os01g0314800	3983.98	1.78281	0.546187	3.2641	0.00109813	0.0266289
Os02g0240300	1958.29	-2.09782	0.642826	-3.26344	0.0011007	0.0266661
Os08g0106000	25.8297	1.57016	0.481397	3.26167	0.00110759	0.0267825
Os10g0165300	33.1457	2.17915	0.669335	3.2557	0.00113115	0.0272238
Os11g0644800	1149.07	1.28062	0.393807	3.25189	0.00114639	0.0275391
Os09g0255400	70.9433	-2.90231	0.893064	-3.24983	0.00115473	0.0276997
Os04g0142400	325.992	-1.45431	0.448192	-3.24482	0.00117523	0.0281005
Os12g0139400	1056.26	1.34397	0.414513	3.24229	0.00118573	0.028325
Os03g0810700	11.3171	-2.72208	0.839674	-3.24183	0.00118765	0.0283448
Os05g0361700	54.7449	-2.50576	0.773402	-3.23992	0.00119564	0.0285089
Os03g0218500	148.27	1.3865	0.428025	3.23929	0.00119829	0.0285456
Os02g0186800	111.732	1.35223	0.417521	3.23871	0.0012007	0.0285764
Os01g0891700	29.422	-1.51521	0.468387	-3.23494	0.00121667	0.0289298
Os04g0635500	199.729	-1.7488	0.541259	-3.23099	0.00123362	0.0292514
Os05g0239151	146.537	1.08551	0.336081	3.22991	0.00123829	0.0293351
Os01g0962700	2829.69	-1.33281	0.412899	-3.22793	0.00124691	0.029485
Os09g0471500	44.3224	-1.64959	0.511038	-3.22793	0.00124691	0.029485
Os04g0509400	147.773	-1.45569	0.451343	-3.22525	0.00125864	0.0297349
Os06g0721800	19.5727	-2.78596	0.865292	-3.21968	0.00128336	0.0302078
Os09g0474000	39.6545	-1.45459	0.452055	-3.21772	0.00129212	0.0303584
Os05g0580000	368.825	1.01107	0.314649	3.21334	0.001312	0.0307692
Os12g0156100	5.34246	-5.56492	1.7321	-3.21282	0.0013144	0.0307819
Os02g0633066	44.0907	-2.66325	0.828975	-3.2127	0.00131494	0.0307819
Os11g0547800	68.4625	1.83614	0.571746	3.21146	0.00132063	0.0308588
Os10g0140300	17.0712	2.78255	0.866578	3.21096	0.00132292	0.0308842
Os01g0625300	56.8367	1.25437	0.390776	3.20994	0.00132761	0.0309362
Os01g0933200	353.461	1.17235	0.365619	3.20647	0.00134374	0.0312565
Os03g0126700	595.821	1.21823	0.380162	3.2045	0.00135298	0.0313846
Os05g0557400	635.187	-1.01724	0.317466	-3.20425	0.00135413	0.0313846
Os05g0494600	25.7894	2.70626	0.844873	3.20316	0.00135928	0.0314229
Os07g0162600	537.388	-1.3585	0.424095	-3.2033	0.00135862	0.0314229
Os08g0442400	71.5857	-1.57003	0.490157	-3.20312	0.00135946	0.0314229
Os03g0307200	372.083	4.89148	1.52976	3.19755	0.001386	0.0319501
Os09g0343400	52.6101	-1.73891	0.543787	-3.19777	0.00138493	0.0319501
Os09g0322400	55.1844	-1.42676	0.446332	-3.19664	0.0013904	0.0320229
Os06g0683400	198.828	-1.96018	0.613644	-3.19433	0.00140155	0.032222
Os05g0148500	4.15993	5.23115	1.63876	3.19214	0.00141224	0.0324096
Os09g0468150	43.1355	-1.18103	0.370433	-3.18825	0.00143137	0.0327608
Os12g0443000	14.9058	-3.06288	0.960944	-3.18737	0.00143574	0.0328314
Os01g0348900	739.314	1.9354	0.607573	3.18546	0.00144524	0.0330193
Os10g0191300	10.4897	-4.69658	1.47458	-3.18503	0.00144737	0.0330387
Os01g0605700	66.5481	1.60797	0.505288	3.18229	0.00146116	0.0333239
Os03g0723400	87.3052	6.30062	1.98016	3.18187	0.00146329	0.0333266
Os01g0962100	289.907	1.4808	0.465695	3.17977	0.00147391	0.033466
Os02g0139000	238.216	1.51536	0.476529	3.18	0.00147275	0.033466
Os02g0526400	2096.07	-1.48327	0.466558	-3.17919	0.0014769	0.0334747
Os05g0366300	47.6805	1.82028	0.572563	3.17918	0.0014769	0.0334747
Os03g0167600	10.6737	3.25088	1.02411	3.17434	0.00150176	0.0339782
Os01g0699100	76.418	-1.46846	0.462786	-3.17308	0.0015083	0.0340961
Os01g0796400	713.316	-1.14694	0.361527	-3.17248	0.00151145	0.0341373
Os04g0179200	63.2449	-5.71602	1.80195	-3.17213	0.00151324	0.0341476
Os12g0186600	373.442	-1.76252	0.556119	-3.16931	0.00152799	0.0344201
Os06g0125800	174.686	-1.09162	0.344475	-3.16893	0.00153	0.034435
Os01g0737500	12.814	-4.0808	1.28927	-3.1652	0.00154975	0.0348186
Os11g0656000	19.0124	-2.71026	0.856739	-3.16346	0.00155907	0.0349667
Os07g0273301	18.3957	2.38084	0.752567	3.16363	0.00155816	0.0349667
Os01g0111700	26.547	-3.25876	1.03094	-3.16097	0.00157247	0.0351658
Os03g0684700	574.45	1.08294	0.342616	3.16079	0.00157342	0.0351658
Os04g0175600	199.134	-1.10252	0.349311	-3.15628	0.00159797	0.0356213
Os09g0347300	30.4038	-1.57331	0.498569	-3.15566	0.00160136	0.0356661
Os11g0161700	18.5659	1.98079	0.627782	3.15522	0.00160377	0.0356887
Os07g0541800	7.32397	-3.71936	1.18043	-3.15085	0.00162799	0.0361337
Os01g0921100	51.3825	1.3037	0.414401	3.146	0.00165521	0.0366746
Os03g0232200	4.57403	5.80287	1.84567	3.14404	0.0016663	0.0368885
Os03g0234500	5.39622	-4.73567	1.50801	-3.14034	0.00168751	0.0373173
Os03g0641250	34.2425	-1.64243	0.523042	-3.14016	0.00168858	0.0373173
Os04g0364800	388.485	-1.40705	0.448144	-3.13973	0.00169101	0.0373389
Os12g0620100	11.3483	-4.29467	1.36822	-3.13887	0.00169602	0.0374129
Os01g0656200	34.3007	1.89782	0.604933	3.13725	0.00170542	0.0374648
Os11g0594000	24.1472	-3.45116	1.10015	-3.137	0.00170684	0.0374648
Os12g0152100	117.569	1.03498	0.329944	3.13683	0.00170783	0.0374648
Os01g0388101	27.6897	-1.35794	0.433028	-3.13591	0.00171323	0.0375239
Os04g0223500	179.067	1.94199	0.6194	3.13528	0.00171692	0.0375239
Os07g0673400	286.386	-1.06521	0.339749	-3.1353	0.00171677	0.0375239
Os09g0272200	86.8147	1.70313	0.543685	3.13256	0.00173288	0.0378084
Os08g0528700	45.8877	1.35118	0.431559	3.13093	0.00174255	0.0379549
Os01g0178900	125.965	-1.14501	0.36615	-3.12715	0.00176508	0.0383804
Os03g0701100	29.2246	1.74301	0.557605	3.12589	0.00177268	0.0384481
Os12g0138050	40.0184	-1.83895	0.588473	-3.12496	0.0017783	0.0385374
Os12g0464400	14.6257	5.61496	1.79841	3.12217	0.00179522	0.0388281
Os08g0412700	94.8503	2.00789	0.643142	3.122	0.00179625	0.0388281
Os01g0218100	265.463	1.3978	0.448029	3.11988	0.00180922	0.0390098
Os12g0105600	84.7462	-1.42699	0.457582	-3.11854	0.00181753	0.0391233
Os07g0639900	44.9831	1.40608	0.451347	3.11531	0.00183752	0.0394874
Os04g0610400	253.442	-1.37007	0.440704	-3.10882	0.00187834	0.0401965
Os09g0432300	19.8124	-2.37915	0.76578	-3.10683	0.00189106	0.0404013
Os03g0277600	11.4463	-3.27085	1.05367	-3.10426	0.00190757	0.0406865
Os08g0203350	9.35439	-3.54183	1.14112	-3.10381	0.00191046	0.0407142
Os07g0210000	251.7	1.19708	0.385793	3.10292	0.00191622	0.0408031
Os09g0379600	122.417	1.39146	0.448635	3.10153	0.00192522	0.0409609
Os11g0173100	10.4193	-2.36818	0.764084	-3.09937	0.00193933	0.0411587
Os03g0725400	53.3353	1.22151	0.394161	3.09901	0.00194166	0.0411741
Os06g0699301	92.069	-1.30033	0.419766	-3.09776	0.00194988	0.0412462
Os02g0537000	211.839	1.7183	0.554883	3.09668	0.00195698	0.0413284
Os02g0582900	11.4261	-2.40697	0.77785	-3.09439	0.00197218	0.0415359
Os01g0194600	216.236	1.38931	0.449182	3.09297	0.00198164	0.0416777
Os09g0344400	6.42919	5.57553	1.80319	3.09204	0.00198786	0.0417744
Os11g0175700	109.269	-1.046	0.338324	-3.0917	0.00199012	0.0417876
Os05g0104200	23.4291	-2.5359	0.821829	-3.08568	0.00203087	0.0425314
Os01g0713600	14.648	-2.42325	0.785657	-3.08436	0.00203989	0.0426583
Os03g0787000	242.721	-1.29187	0.4189	-3.08396	0.00204268	0.0426819
Os01g0864500	177.916	-2.02904	0.658694	-3.08039	0.00206726	0.0430952
Os04g0565200	27.4585	2.01696	0.654782	3.08036	0.0020675	0.0430952
Os02g0218600	4.38541	4.58024	1.48713	3.07992	0.00207056	0.0431122
Os02g0584800	265.135	-1.76888	0.574755	-3.07763	0.00208652	0.0433861
Os01g0341750	13.5826	1.78134	0.57939	3.0745	0.00210852	0.0437021
Os06g0163701	3.05641	-5.17707	1.68385	-3.07455	0.00210821	0.0437021
Os07g0683200	611.228	-1.41555	0.460554	-3.07359	0.002115	0.043801
Os02g0651900	213.062	1.30679	0.42532	3.0725	0.00212275	0.0439261
Os08g0480000	334.945	1.08106	0.351969	3.07148	0.00213004	0.0440414
Os02g0703600	23.0509	-3.75942	1.22517	-3.0685	0.00215139	0.0443431
Os05g0183100	451.411	-1.12833	0.367665	-3.06891	0.00214843	0.0443431
Os05g0355400	5488.47	-1.48043	0.482463	-3.06848	0.00215154	0.0443431
Os05g0382200	5.06587	5.88876	1.91874	3.06908	0.0021472	0.0443431
Os03g0411800	534.057	-1.22028	0.397826	-3.06737	0.00215948	0.0444711
Os08g0335500	47.0214	2.02542	0.660497	3.06651	0.00216572	0.0445281
Os10g0550900	418.989	-1.53567	0.501364	-3.06299	0.00219136	0.0449115
Os10g0552700	683.89	-1.70245	0.55573	-3.06345	0.00218797	0.0449115
Os07g0558100	10.9103	4.6686	1.5241	3.06318	0.00218997	0.0449115
Os10g0181100	18.9564	-2.46047	0.804032	-3.06016	0.00221215	0.0452654
Os08g0239900	23.448	2.07336	0.677887	3.05857	0.002224	0.0454715
Os03g0113900	27.3576	-2.7668	0.905659	-3.05502	0.00225048	0.0458704
Os09g0557500	43.9928	1.99819	0.654074	3.05499	0.00225065	0.0458704
Os02g0575900	68.3588	-1.2521	0.409971	-3.05412	0.00225724	0.0459496
Os05g0142100	71.9585	-1.42944	0.468102	-3.05369	0.00226046	0.0459609
Os04g0598800	84.3289	-1.35086	0.442488	-3.05289	0.00226651	0.0460127
Os05g0140334	69.2526	1.26898	0.415952	3.05078	0.00228248	0.0462621
Os08g0151900	5.08237	4.95599	1.62866	3.04299	0.0023424	0.0473271
Os01g0718000	149.865	-1.36216	0.448562	-3.03673	0.00239156	0.0482067
Os11g0558900	32.3747	-4.05553	1.33644	-3.03459	0.00240865	0.048513
Os03g0808200	8.68661	2.80447	0.92452	3.03343	0.00241791	0.0485731
Os11g0214400	33.1054	-2.02117	0.666444	-3.03277	0.00242321	0.0485776
Os01g0138400	30.2241	-2.48136	0.818671	-3.03096	0.00243778	0.0488317
Os10g0394000	13.6961	-2.84805	0.940326	-3.02879	0.00245536	0.0491455
Os01g0940000	259.047	1.63383	0.540027	3.02546	0.00248254	0.0495737
Os07g0178800	337.056	1.77391	0.586281	3.0257	0.00248062	0.0495737

## Sheet: +Fe
Gene ID	Base mean	log2 FC	SE	Statistic	P	adjusted P
Os08g0231400	6267.95	-4.66554	0.300755	-15.5128	2.84423e-54	7.30398e-50
Os07g0617000	1892.63	-2.98946	0.211059	-14.1641	1.5277e-45	1.96156e-41
Os01g0141000	2741.28	-4.47924	0.319203	-14.0326	9.8531e-45	8.43426e-41
Os06g0306300	1415.41	-4.00619	0.286225	-13.9967	1.63374e-44	1.04886e-40
Os01g0192900	781.221	-9.56821	0.700635	-13.6565	1.84701e-42	9.48624e-39
Os08g0203400	653.734	-6.20225	0.459074	-13.5104	1.35866e-41	5.81508e-38
Os05g0177500	729.573	4.93459	0.368549	13.3892	6.99208e-41	2.56509e-37
Os07g0537500	534.27	-3.41808	0.257003	-13.2998	2.32207e-40	7.45383e-37
Os03g0790700	421.456	-6.26568	0.475515	-13.1766	1.19645e-39	3.41387e-36
Os04g0688100	3759.28	-4.66249	0.362655	-12.8565	7.90493e-38	2.02998e-34
Os03g0297600	2540.59	-3.17067	0.249926	-12.6864	7.03073e-37	1.50458e-33
Os07g0537600	314.57	-3.2009	0.25228	-12.6879	6.90057e-37	1.50458e-33
Os10g0370500	1287.21	-2.60531	0.224649	-11.5973	4.25472e-31	8.40471e-28
Os04g0616500	686.033	-3.15636	0.272843	-11.5684	5.95934e-31	1.09311e-27
Os04g0688500	2204.04	-7.11659	0.616745	-11.5389	8.39504e-31	1.43723e-27
Os08g0508800	1860.68	-7.1817	0.632945	-11.3465	7.72077e-30	1.23918e-26
Os01g0326300	780.129	-7.59692	0.681239	-11.1516	7.03169e-29	1.0622e-25
Os04g0489600	941.105	-3.74486	0.354557	-10.5621	4.46668e-26	6.37247e-23
Os10g0409400	983.973	-13.6212	1.30357	-10.4491	1.47914e-25	1.99918e-22
Os06g0554600	244.937	2.34979	0.227293	10.3382	4.73405e-25	5.86034e-22
Os08g0465700	1301.55	-1.75658	0.169931	-10.337	4.79233e-25	5.86034e-22
Os01g0963000	1366.13	-5.63984	0.546643	-10.3172	5.89064e-25	6.87598e-22
Os11g0226933	656.878	-4.91952	0.488078	-10.0794	6.81625e-24	7.61049e-21
Os09g0400400	251.017	-4.40534	0.446573	-9.86479	5.91596e-23	6.33008e-20
Os04g0611400	429.788	-3.79023	0.388931	-9.74526	1.93276e-22	1.98533e-19
Os03g0757200	951.847	5.39491	0.555037	9.7199	2.48026e-22	2.44974e-19
Os05g0149300	500.896	-2.77555	0.28592	-9.70746	2.80232e-22	2.66532e-19
Os11g0256900	2823.56	-4.97991	0.520941	-9.55943	1.18402e-21	1.08591e-18
Os07g0251200	123.282	-4.43816	0.464531	-9.55407	1.24701e-21	1.10425e-18
Os04g0316200	267.004	-5.40094	0.57447	-9.40162	5.37309e-21	4.59937e-18
Os01g0268600	375.232	-2.56651	0.273466	-9.38513	6.28383e-21	5.20544e-18
Os08g0109300	2817.84	2.05024	0.21919	9.35372	8.46166e-21	6.79048e-18
Os01g0975900	2403.43	4.08447	0.438738	9.30958	1.28342e-20	9.70763e-18
Os07g0561800	134.906	-3.66727	0.393931	-9.30942	1.28528e-20	9.70763e-18
Os07g0538700	93.6101	-3.13656	0.337133	-9.30363	1.3573e-20	9.95873e-18
Os06g0707800	801.326	-2.0747	0.226633	-9.15442	5.46492e-20	3.89831e-17
Os01g0813800	1054.85	-2.16089	0.237691	-9.09121	9.79441e-20	6.77545e-17
Os05g0397300	1221.42	-2.02772	0.223104	-9.08867	1.0026e-19	6.77545e-17
Os03g0796600	2006.5	1.26891	0.141009	8.99881	2.28171e-19	1.50242e-16
Os09g0412700	466.08	2.66536	0.296999	8.97431	2.85132e-19	1.83055e-16
Os06g0678500	171.819	3.52655	0.39312	8.97066	2.9475e-19	1.84614e-16
Os05g0576500	127.311	-4.08577	0.45726	-8.93533	4.05971e-19	2.48222e-16
Os11g0649700	573.787	-3.47673	0.391259	-8.88599	6.33553e-19	3.78364e-16
Os03g0194900	1513.38	-2.12244	0.243968	-8.69966	3.32874e-18	1.94277e-15
Os09g0399800	191.784	-7.69511	0.889554	-8.65052	5.12634e-18	2.92543e-15
Os12g0231000	649.529	2.61123	0.302564	8.63033	6.1174e-18	3.41511e-15
Os12g0263600	327.761	1.74126	0.202777	8.58706	8.92208e-18	4.87487e-15
Os02g0695800	675.248	-1.62052	0.188775	-8.58441	9.1305e-18	4.88482e-15
Os07g0542600	185.201	-4.26343	0.498435	-8.55362	1.19284e-17	6.25145e-15
Os02g0527600	2398.75	-2.58882	0.309113	-8.37499	5.52264e-17	2.83643e-14
Os03g0242300	337.808	3.13487	0.375771	8.34252	7.27221e-17	3.66177e-14
Os01g0952500	1175.02	1.39315	0.167384	8.32311	8.56859e-17	4.23156e-14
Os01g0326100	105.584	-8.02261	0.9646	-8.31703	9.01944e-17	4.37017e-14
Os02g0822900	77.811	-5.46666	0.65766	-8.31229	9.38727e-17	4.46417e-14
Os01g0940800	394.383	-5.59303	0.679511	-8.23095	1.85732e-16	8.67199e-14
Os01g0953500	626.398	1.78968	0.21804	8.20802	2.24861e-16	1.03115e-13
Os09g0481700	1824.69	-1.6486	0.20211	-8.15693	3.43642e-16	1.5482e-13
Os02g0603600	620.792	-2.53747	0.311588	-8.14368	3.83456e-16	1.69779e-13
Os05g0181700	81.8442	-4.52317	0.556737	-8.12443	4.49487e-16	1.95641e-13
Os04g0405900	1925.48	-2.0794	0.256873	-8.09505	5.72398e-16	2.44986e-13
Os08g0452900	619.186	-1.99552	0.246683	-8.08942	5.99473e-16	2.52368e-13
Os05g0166300	136.384	-3.86066	0.477464	-8.08577	6.17745e-16	2.55866e-13
Os02g0606800	452.928	-2.26329	0.280333	-8.07359	6.82626e-16	2.73904e-13
Os03g0107800	1409.29	1.02274	0.126648	8.07547	6.72193e-16	2.73904e-13
Os04g0380300	660.378	-2.43059	0.3049	-7.97176	1.56427e-15	6.18006e-13
Os03g0432100	382.827	-2.97769	0.374655	-7.94782	1.89821e-15	7.38577e-13
Os08g0249900	174.243	2.40884	0.303406	7.93931	2.03313e-15	7.79265e-13
Os06g0160700	500.498	2.59528	0.327248	7.9306	2.1809e-15	8.23611e-13
Os10g0148400	421.333	2.46107	0.3104	7.92868	2.21484e-15	8.24306e-13
Os07g0539900	855.497	-5.34124	0.675155	-7.91113	2.55069e-15	9.35738e-13
Os03g0739700	161.482	-2.96591	0.37507	-7.90761	2.62368e-15	9.48959e-13
Os04g0565500	877.035	-2.65338	0.33987	-7.80705	5.85398e-15	2.08792e-12
Os02g0194700	11491	3.8471	0.493474	7.79595	6.39256e-15	2.24878e-12
Os06g0694200	180.539	5.73985	0.737202	7.786	6.91647e-15	2.4002e-12
Os07g0628900	1495.92	4.18123	0.537465	7.77954	7.27907e-15	2.49235e-12
Os04g0559400	441.529	-1.6327	0.210265	-7.76495	8.16772e-15	2.75983e-12
Os04g0616700	919.764	-2.50675	0.323974	-7.73751	1.01385e-14	3.38127e-12
Os04g0469000	2891.74	-3.8308	0.497052	-7.70704	1.28769e-14	4.23947e-12
Os09g0357400	340.783	-4.67282	0.609558	-7.66591	1.77571e-14	5.77218e-12
Os08g0378000	459.759	-3.57668	0.470539	-7.60123	2.9333e-14	9.41589e-12
Os07g0677200	3022.14	-3.30763	0.436066	-7.58516	3.32085e-14	1.05283e-11
Os11g0489250	1017.27	3.81126	0.502706	7.58148	3.4163e-14	1.06989e-11
Os02g0608000	99.5945	7.06159	0.932631	7.57168	3.68419e-14	1.13988e-11
Os01g0846300	284.641	2.34448	0.311589	7.52428	5.30131e-14	1.62069e-11
Os04g0630800	277.023	-3.18582	0.424519	-7.50454	6.16428e-14	1.86234e-11
Os10g0527400	224.271	4.87279	0.651999	7.47363	7.80142e-14	2.32954e-11
Os07g0663800	1905.14	-2.72364	0.364947	-7.46311	8.45054e-14	2.49437e-11
Os12g0136500	2314.04	-1.428	0.191492	-7.45726	8.83379e-14	2.57786e-11
Os03g0150600	1857.24	-2.74814	0.370308	-7.42123	1.16034e-13	3.34804e-11
Os11g0618700	541.178	-1.96565	0.264965	-7.41851	1.18444e-13	3.37961e-11
Os02g0683800	74.0051	-3.17912	0.428671	-7.41623	1.20505e-13	3.40061e-11
Os11g0547000	428.529	2.05232	0.277025	7.40845	1.27785e-13	3.56687e-11
Os11g0669100	151.832	-3.87979	0.524339	-7.3994	1.36801e-13	3.77748e-11
Os09g0246300	1225.86	-2.69162	0.364166	-7.39119	1.45521e-13	3.97552e-11
Os02g0128000	97.9323	2.85939	0.387292	7.38302	1.54738e-13	4.18282e-11
Os06g0649000	137.218	-5.57725	0.756317	-7.37422	1.65305e-13	4.4219e-11
Os05g0136200	364.075	-1.70849	0.23181	-7.3702	1.70367e-13	4.51033e-11
Os02g0206700	979.763	2.63054	0.356997	7.36851	1.72546e-13	4.52141e-11
Os05g0525900	461.837	-2.16437	0.294649	-7.34557	2.04889e-13	5.31471e-11
Os09g0478300	1216.88	3.97131	0.541159	7.33854	2.15935e-13	5.54521e-11
Os03g0183000	915.272	-2.99523	0.408495	-7.33236	2.26138e-13	5.74972e-11
Os09g0319800	59.6852	-9.82944	1.3535	-7.26226	3.80672e-13	9.58399e-11
Os10g0159800	1328.25	1.26842	0.17494	7.2506	4.14926e-13	1.0345e-10
Os07g0178700	606.249	3.21946	0.444557	7.24195	4.42276e-13	1.09208e-10
Os11g0644600	1032.02	1.38178	0.190952	7.23629	4.61141e-13	1.12782e-10
Os07g0661000	257.424	2.17011	0.300027	7.23305	4.72275e-13	1.14415e-10
Os03g0664800	166.611	-4.66386	0.647687	-7.20079	5.98662e-13	1.43679e-10
Os01g0796000	129.995	-5.85925	0.815009	-7.18918	6.51811e-13	1.54986e-10
Os01g0627967	87.539	8.6065	1.20212	7.15942	8.10183e-13	1.90876e-10
Os01g0580500	455.43	-1.85967	0.26018	-7.14761	8.8302e-13	2.06145e-10
Os12g0592900	79.8905	-5.39066	0.755292	-7.13718	9.52634e-13	2.20393e-10
Os10g0348900	165.992	-3.44755	0.483214	-7.13462	9.70541e-13	2.2071e-10
Os02g0475400	2136.51	2.35545	0.330148	7.13453	9.71192e-13	2.2071e-10
Os01g0827800	45.0737	-9.20525	1.29168	-7.12656	1.02909e-12	2.27819e-10
Os10g0180800	1130.03	-3.4624	0.485782	-7.12748	1.0222e-12	2.27819e-10
Os02g0563000	45.5035	4.97444	0.697789	7.12887	1.01198e-12	2.27819e-10
Os08g0562600	3101.22	-1.6657	0.233817	-7.12394	1.04884e-12	2.30208e-10
Os07g0538400	177.098	-3.2344	0.455196	-7.1055	1.19883e-12	2.60899e-10
Os09g0452800	142.08	1.77072	0.249552	7.09559	1.28802e-12	2.77952e-10
Os06g0618700	596.575	-1.6854	0.2377	-7.09044	1.33688e-12	2.86093e-10
Os01g0136700	49.0758	-5.03267	0.709969	-7.08858	1.35495e-12	2.87564e-10
Os08g0423500	67.927	-10.4316	1.47442	-7.07505	1.49394e-12	3.14463e-10
Os01g0681700	262.198	-2.87987	0.407475	-7.06759	1.57646e-12	3.29135e-10
Os08g0355400	2200.24	-2.5193	0.35709	-7.05507	1.72511e-12	3.57264e-10
Os02g0712700	300.884	-1.88643	0.268151	-7.03495	1.99334e-12	4.09512e-10
Os03g0843800	881.646	3.82381	0.543755	7.03224	2.03244e-12	4.1423e-10
Os07g0598200	1823.27	-1.05638	0.150507	-7.01882	2.23743e-12	4.52419e-10
Os04g0117900	841.607	-2.54079	0.362647	-7.00625	2.4479e-12	4.91111e-10
Os06g0228500	173.984	2.42699	0.347005	6.9941	2.66965e-12	5.31447e-10
Os09g0460500	869.583	2.33534	0.334788	6.97558	3.04621e-12	6.01744e-10
Os04g0401700	697.27	-3.51379	0.504354	-6.96691	3.23971e-12	6.35081e-10
Os09g0272000	857.287	2.78107	0.399482	6.96169	3.36217e-12	6.54095e-10
Os08g0484200	152.982	-3.24016	0.465717	-6.95736	3.46707e-12	6.69431e-10
Os09g0339000	316.499	-2.97397	0.428149	-6.9461	3.75536e-12	7.19683e-10
Os03g0232400	354.56	2.27256	0.327229	6.94488	3.78792e-12	7.20546e-10
Os08g0482700	6063.76	-1.99445	0.287738	-6.93149	4.16427e-12	7.86312e-10
Os01g0713200	1140.35	-4.56921	0.66014	-6.92158	4.4662e-12	8.37169e-10
Os01g0687400	328.572	-3.37598	0.489849	-6.89189	5.50574e-12	1.01806e-09
Os02g0579800	870.431	-1.90265	0.276076	-6.89176	5.51054e-12	1.01806e-09
Os01g0677900	118.142	-3.97426	0.578478	-6.87021	6.41076e-12	1.17592e-09
Os05g0553400	320.672	-1.98839	0.289475	-6.86896	6.46696e-12	1.17781e-09
Os01g0975300	1374.96	-3.23065	0.471234	-6.85574	7.09448e-12	1.283e-09
Os05g0486100	451.08	-3.5765	0.525062	-6.81157	9.65377e-12	1.73363e-09
Os09g0491820	1088.71	1.54435	0.227258	6.79559	1.07874e-11	1.92375e-09
Os06g0522300	73.1788	-5.37699	0.792438	-6.78537	1.15788e-11	2.05064e-09
Os11g0278300	180.615	-3.65912	0.540453	-6.77045	1.28379e-11	2.25806e-09
Os07g0529600	50276.4	2.66304	0.393949	6.75985	1.38135e-11	2.41313e-09
Os08g0174300	93.6307	5.04996	0.751174	6.72276	1.7832e-11	3.09409e-09
Os07g0412100	7676.41	1.43151	0.213056	6.71893	1.83064e-11	3.15509e-09
Os09g0570800	72.3356	-4.40214	0.655472	-6.71599	1.86798e-11	3.19799e-09
Os03g0856500	19134.7	-1.7185	0.256093	-6.71047	1.93997e-11	3.29923e-09
Os05g0113400	1331.24	1.37162	0.204567	6.70498	2.01429e-11	3.40309e-09
Os03g0233000	89.4033	-2.88094	0.43007	-6.69878	2.10174e-11	3.52762e-09
Os01g0810300	2850.92	1.4954	0.223268	6.69778	2.11609e-11	3.52865e-09
Os01g0194300	267.419	-2.40212	0.358916	-6.69271	2.19071e-11	3.61539e-09
Os06g0703900	636.971	1.39511	0.208464	6.69234	2.19626e-11	3.61539e-09
Os06g0228200	1426.91	1.28847	0.192667	6.68753	2.26963e-11	3.71236e-09
Os07g0150700	666.352	-1.90061	0.284533	-6.67975	2.39346e-11	3.89013e-09
Os01g0940700	1707.75	-4.17994	0.628659	-6.64899	2.95119e-11	4.76646e-09
Os09g0272900	2856.22	-2.52104	0.379415	-6.64455	3.0415e-11	4.88162e-09
Os04g0585200	2432.18	1.46293	0.220307	6.64044	3.12752e-11	4.98849e-09
Os12g0547600	527.883	-2.72656	0.411346	-6.6284	3.39335e-11	5.37909e-09
Os11g0250400	52.1816	-5.5639	0.841182	-6.61439	3.7309e-11	5.87789e-09
Os05g0161500	5989.15	2.77637	0.420256	6.60639	3.93817e-11	6.12923e-09
Os06g0487620	68.4578	-2.67402	0.405338	-6.59701	4.19526e-11	6.49001e-09
Os03g0806600	746.083	-2.3979	0.364217	-6.58371	4.58848e-11	7.01382e-09
Os08g0260600	201.261	-2.79458	0.42446	-6.58386	4.58374e-11	7.01382e-09
Os02g0199200	172.539	-2.26541	0.344909	-6.56814	5.09493e-11	7.74189e-09
Os05g0202800	425.515	5.89931	0.900117	6.55394	5.60386e-11	8.46512e-09
Os07g0572300	200.914	1.2795	0.195475	6.54559	5.92609e-11	8.89953e-09
Os10g0469700	310.785	-2.27546	0.347811	-6.54224	6.06039e-11	9.04831e-09
Os08g0174100	138.952	3.97727	0.608549	6.53566	6.33298e-11	9.40063e-09
Os07g0106200	1513.26	-2.93102	0.448901	-6.52931	6.60715e-11	9.75124e-09
Os11g0214400	33.1054	-4.95796	0.760368	-6.52047	7.00891e-11	1.02851e-08
Os03g0133800	102.657	-1.76006	0.270354	-6.51022	7.50412e-11	1.09492e-08
Os03g0255500	3365.39	-2.04638	0.314389	-6.50908	7.56146e-11	1.09705e-08
Os02g0562600	110.403	-3.29976	0.50729	-6.50469	7.78552e-11	1.12321e-08
Os01g0191200	5161.54	1.3394	0.205969	6.50292	7.87768e-11	1.13016e-08
Os11g0298000	74.8758	-9.34081	1.43666	-6.50174	7.93972e-11	1.13273e-08
Os01g0848900	471.711	-2.07746	0.319812	-6.49587	8.25536e-11	1.17126e-08
Os10g0376900	71.0254	-4.18522	0.644565	-6.4931	8.40897e-11	1.1865e-08
Os01g0203400	41.1964	-2.92661	0.450979	-6.48945	8.61482e-11	1.2089e-08
Os05g0311500	893.282	2.48785	0.384072	6.47755	9.32264e-11	1.30112e-08
Os01g0511000	571.046	-1.95377	0.301936	-6.47082	9.74722e-11	1.35302e-08
Os11g0626700	1089.06	-2.56157	0.396296	-6.46379	1.02116e-10	1.4092e-08
Os05g0365600	687.816	1.55451	0.240522	6.46304	1.02617e-10	1.4092e-08
Os05g0217700	10608.8	2.82007	0.437113	6.4516	1.10678e-10	1.51182e-08
Os01g0695300	1082.57	1.92015	0.298256	6.43794	1.21107e-10	1.64551e-08
Os12g0628100	675.8	1.53	0.238411	6.41747	1.38555e-10	1.87269e-08
Os07g0628700	3682.43	3.3735	0.526279	6.4101	1.45427e-10	1.95527e-08
Os03g0235000	181.749	-3.48556	0.543894	-6.40852	1.46935e-10	1.96525e-08
Os11g0156600	59.3647	-5.6063	0.875016	-6.40709	1.48326e-10	1.96919e-08
Os03g0703200	1677.38	-1.1753	0.18345	-6.40664	1.48763e-10	1.96919e-08
Os03g0189400	1067.28	-2.28659	0.357061	-6.40392	1.51437e-10	1.99431e-08
Os07g0491800	684.327	2.18903	0.342177	6.39737	1.58075e-10	2.07111e-08
Os11g0541600	227.187	-2.44598	0.382644	-6.39231	1.63397e-10	2.12997e-08
Os09g0468150	43.1355	-2.51216	0.394055	-6.37514	1.82791e-10	2.37075e-08
Os03g0729000	1234.52	2.82221	0.443606	6.36197	1.9918e-10	2.57032e-08
Os01g0138500	276.639	1.83545	0.28912	6.34841	2.17554e-10	2.79339e-08
Os10g0524700	77.4102	-2.89703	0.456618	-6.34454	2.23091e-10	2.83951e-08
Os07g0686300	240.543	-3.70296	0.583662	-6.34436	2.23357e-10	2.83951e-08
Os09g0447300	65.9448	-3.86468	0.611557	-6.3194	2.62582e-10	3.32172e-08
Os07g0115500	289.729	4.35084	0.690523	6.30078	2.96142e-10	3.72791e-08
Os04g0688600	140.261	-4.92842	0.782727	-6.29648	3.04475e-10	3.81411e-08
Os05g0375400	11450.5	-2.23473	0.355561	-6.2851	3.27635e-10	4.0843e-08
Os06g0218900	46.478	-4.87367	0.775549	-6.28416	3.29636e-10	4.0894e-08
Os06g0710300	1930.91	-1.82572	0.290758	-6.27916	3.40409e-10	4.19541e-08
Os08g0202300	4600.55	-2.83609	0.451702	-6.27868	3.41449e-10	4.19541e-08
Os11g0227200	131.467	-3.23391	0.516461	-6.26168	3.80861e-10	4.63531e-08
Os09g0434500	17816.2	-1.01489	0.162212	-6.2566	3.93449e-10	4.76593e-08
Os05g0548900	2459.13	2.62206	0.41955	6.2497	4.1123e-10	4.95793e-08
Os09g0499000	236.505	-1.22736	0.196511	-6.24578	4.21694e-10	5.06033e-08
Os08g0425500	62.0549	2.05291	0.329441	6.2315	4.62004e-10	5.51827e-08
Os07g0543300	163.769	4.56692	0.734311	6.21933	4.99298e-10	5.9361e-08
Os08g0517200	1411.85	-1.86443	0.300331	-6.20793	5.36871e-10	6.35338e-08
Os08g0351200	954.719	-2.15531	0.347296	-6.20596	5.43625e-10	6.4038e-08
Os02g0744900	17697.9	1.11015	0.178926	6.20454	5.48585e-10	6.43273e-08
Os09g0438100	831.576	3.0047	0.484365	6.20336	5.52687e-10	6.45137e-08
Os09g0436000	1520.67	-1.40923	0.227217	-6.20214	5.57006e-10	6.47236e-08
Os11g0614500	539.714	-1.77437	0.28631	-6.19737	5.74139e-10	6.64139e-08
Os01g0140700	79.3182	-3.75727	0.606532	-6.19467	5.84055e-10	6.72458e-08
Os09g0350900	116.152	-3.23984	0.523062	-6.194	5.86568e-10	6.72458e-08
Os06g0521500	63.9743	-6.22174	1.0049	-6.19139	5.96346e-10	6.80629e-08
Os04g0370900	472.803	-3.77935	0.61129	-6.18258	6.30633e-10	7.16578e-08
Os07g0142900	10159.2	2.44251	0.396023	6.16761	6.93311e-10	7.84327e-08
Os05g0495600	493.49	-2.88905	0.468584	-6.16551	7.02578e-10	7.91325e-08
Os01g0221600	370.822	-2.30997	0.375114	-6.15806	7.36419e-10	8.25818e-08
Os10g0513200	194.229	1.40826	0.228752	6.15628	7.44755e-10	8.31535e-08
Os01g0670100	164.029	-3.51782	0.574663	-6.12154	9.26773e-10	1.02025e-07
Os02g0823100	1266.06	2.59043	0.423079	6.1228	9.19465e-10	1.02025e-07
Os03g0684400	4431.7	1.01712	0.166136	6.12221	9.22836e-10	1.02025e-07
Os03g0820500	843.792	4.09187	0.668492	6.12104	9.29664e-10	1.02025e-07
Os01g0609900	446.339	-2.78991	0.457251	-6.10147	1.05094e-09	1.14843e-07
Os01g0830700	797.336	-1.6539	0.271204	-6.09835	1.07168e-09	1.16588e-07
Os07g0635700	940.819	1.47111	0.241257	6.09771	1.07599e-09	1.16588e-07
Os02g0807800	64.1836	-8.92922	1.46581	-6.09168	1.11733e-09	1.20559e-07
Os01g0392600	135.185	-2.43648	0.400069	-6.09015	1.12808e-09	1.2121e-07
Os12g0611100	319.049	-1.70069	0.279309	-6.08893	1.13666e-09	1.21623e-07
Os04g0556500	144.984	-2.77895	0.4565	-6.08752	1.14674e-09	1.22192e-07
Os11g0229500	27.6527	-8.28419	1.36242	-6.0805	1.19806e-09	1.27133e-07
Os04g0423600	4191.47	1.44706	0.238136	6.0766	1.22754e-09	1.29725e-07
Os08g0335500	47.0214	4.99414	0.822165	6.07437	1.24473e-09	1.31003e-07
Os05g0468900	176.283	-2.51385	0.414636	-6.06279	1.33781e-09	1.40224e-07
Os04g0557800	57.7687	3.96427	0.654757	6.05457	1.40793e-09	1.46974e-07
Os07g0646100	222.68	1.151	0.19017	6.05246	1.42651e-09	1.48311e-07
Os10g0140300	17.0712	8.24649	1.36326	6.04911	1.45651e-09	1.50819e-07
Os02g0437300	1022.61	-1.95978	0.324079	-6.04723	1.47356e-09	1.51972e-07
Os02g0827900	532.045	-2.01353	0.333464	-6.03823	1.5581e-09	1.60048e-07
Os04g0679400	1662.71	-2.71378	0.449691	-6.03476	1.59194e-09	1.62873e-07
Os01g0931000	91.5177	3.17747	0.527686	6.02152	1.72787e-09	1.75935e-07
Os09g0115900	691.917	-2.616	0.434479	-6.02101	1.73332e-09	1.75935e-07
Os03g0183200	59.9244	-4.1671	0.69259	-6.01669	1.78022e-09	1.79985e-07
Os06g0288100	691.698	-2.16704	0.360211	-6.01604	1.7874e-09	1.80001e-07
Os04g0585700	256.184	1.47117	0.244973	6.00545	1.90797e-09	1.91393e-07
Os09g0537700	6263.16	3.64419	0.608896	5.98491	2.16514e-09	2.16345e-07
Os01g0364800	166.786	-2.213	0.369937	-5.98209	2.20288e-09	2.19264e-07
Os07g0538200	34.1936	-5.49361	0.91875	-5.97944	2.23901e-09	2.21999e-07
Os07g0539100	651.821	-2.66718	0.446567	-5.97263	2.3346e-09	2.30587e-07
Os03g0727600	27.4051	-4.05334	0.679683	-5.96357	2.46779e-09	2.42808e-07
Os08g0155900	122.8	4.56487	0.766498	5.95549	2.59287e-09	2.54141e-07
Os04g0452700	356.513	-2.66188	0.447342	-5.95043	2.67438e-09	2.61133e-07
Os03g0850400	3165.44	2.5243	0.4244	5.94792	2.71573e-09	2.64166e-07
Os08g0384500	1018.87	-2.97162	0.500135	-5.94162	2.82212e-09	2.73479e-07
Os11g0565000	51.9044	-3.09372	0.521489	-5.93247	2.98408e-09	2.88087e-07
Os01g0741900	638.528	-2.37026	0.399721	-5.92978	3.0334e-09	2.91751e-07
Os01g0621900	3532.86	1.86061	0.31432	5.91947	3.22988e-09	3.0949e-07
Os04g0364800	388.485	-2.66275	0.45009	-5.91603	3.29804e-09	3.13681e-07
Os08g0189900	32.1641	-8.55999	1.44679	-5.91655	3.28769e-09	3.13681e-07
Os08g0485800	56.1596	-3.88145	0.656233	-5.91474	3.32391e-09	3.14974e-07
Os01g0717400	588.349	2.18647	0.369894	5.91108	3.39865e-09	3.20576e-07
Os05g0186100	84.5359	1.78595	0.30216	5.91063	3.40799e-09	3.20576e-07
Os03g0197100	415.395	2.19616	0.372313	5.89871	3.66357e-09	3.4336e-07
Os12g0210400	2817.84	-1.76219	0.298801	-5.89753	3.68981e-09	3.44561e-07
Os01g0564300	389.642	-3.41948	0.581158	-5.88391	4.00692e-09	3.72818e-07
Os06g0129100	143.315	-2.47461	0.421041	-5.87737	4.16824e-09	3.86428e-07
Os01g0627800	65.773	9.20068	1.56623	5.87443	4.24307e-09	3.90545e-07
Os10g0370400	153.934	-1.26961	0.216169	-5.87325	4.27339e-09	3.91931e-07
Os03g0625300	27.4652	4.41872	0.752635	5.87099	4.33188e-09	3.95881e-07
Os07g0507000	831.509	-1.394	0.238034	-5.85632	4.73224e-09	4.30936e-07
Os10g0417600	3730.43	-1.12791	0.192705	-5.85302	4.82714e-09	4.38025e-07
Os01g0899200	213.495	2.38442	0.407512	5.85116	4.88165e-09	4.41411e-07
Os06g0206900	174.116	1.71554	0.293227	5.85057	4.89889e-09	4.41416e-07
Os04g0684900	317.831	-3.24669	0.555016	-5.84973	4.9236e-09	4.42091e-07
Os03g0287100	142.935	1.76875	0.302576	5.84566	5.04567e-09	4.49905e-07
Os07g0114000	168.625	-2.38275	0.407585	-5.84602	5.03481e-09	4.49905e-07
Os05g0380200	151.725	-3.68277	0.630457	-5.84142	5.17565e-09	4.59092e-07
Os06g0551800	96.5128	-2.28628	0.391411	-5.84114	5.18445e-09	4.59092e-07
Os03g0575700	187.711	-1.88627	0.323329	-5.83389	5.41506e-09	4.77168e-07
Os08g0247600	258.146	2.60794	0.447059	5.83356	5.42574e-09	4.77168e-07
Os12g0105300	1691.38	1.2003	0.205807	5.83215	5.47167e-09	4.79565e-07
Os01g0944100	654.831	3.97682	0.68221	5.82932	5.56538e-09	4.86119e-07
Os05g0162000	70.9305	-3.91304	0.671508	-5.82724	5.63502e-09	4.90533e-07
Os01g0763750	342.649	-1.33831	0.230189	-5.81396	6.10126e-09	5.29325e-07
Os07g0687200	1333.2	-1.38809	0.238905	-5.81021	6.23946e-09	5.39493e-07
Os01g0816100	177.189	-2.47156	0.425664	-5.80637	6.38421e-09	5.50156e-07
Os11g0569600	121.7	-2.59866	0.449503	-5.78118	7.4178e-09	6.37087e-07
Os01g0826400	318.287	-3.89819	0.67451	-5.77929	7.50176e-09	6.407e-07
Os01g0867300	347.19	-1.1891	0.206226	-5.76599	8.11803e-09	6.86245e-07
Os11g0670900	103.403	2.95519	0.512531	5.76587	8.12377e-09	6.86245e-07
Os05g0307100	312.479	1.41825	0.245969	5.76596	8.1194e-09	6.86245e-07
Os07g0283125	43.9756	3.57579	0.622679	5.74258	9.32445e-09	7.82522e-07
Os02g0484975	55.7464	2.77585	0.484428	5.73015	1.0034e-08	8.3933e-07
Os05g0355400	5488.47	-2.75859	0.482809	-5.71363	1.10593e-08	9.19101e-07
Os02g0763900	447.68	-1.57108	0.275147	-5.70998	1.1299e-08	9.35992e-07
Os04g0524500	255.926	-2.9948	0.524671	-5.70796	1.1434e-08	9.44129e-07
Os08g0409100	1465.42	1.74328	0.305899	5.69887	1.20601e-08	9.92638e-07
Os03g0654400	806.566	-1.34976	0.237099	-5.6928	1.24975e-08	1.02535e-06
Os06g0726100	126.594	-5.78479	1.01685	-5.68894	1.27829e-08	1.04543e-06
Os01g0239700	2746.93	-1.00187	0.176251	-5.68436	1.31302e-08	1.07042e-06
Os01g0888900	184.989	-2.23935	0.394541	-5.67584	1.38013e-08	1.12157e-06
Os04g0382300	1546.54	-1.09151	0.192477	-5.67085	1.42095e-08	1.1511e-06
Os01g0227700	189.654	-2.53374	0.447711	-5.65932	1.51975e-08	1.22727e-06
Os01g0227500	582.943	1.599	0.283188	5.64643	1.63813e-08	1.31872e-06
Os04g0127100	39.5465	-6.9529	1.23222	-5.64258	1.67523e-08	1.34437e-06
Os05g0345500	1498.75	-1.12133	0.19881	-5.64019	1.69866e-08	1.35893e-06
Os02g0570400	206.477	-5.19666	0.921456	-5.63962	1.7043e-08	1.35921e-06
Os04g0339400	394.453	4.58281	0.812916	5.6375	1.72541e-08	1.37178e-06
Os08g0480000	334.945	2.00588	0.355874	5.63648	1.73563e-08	1.37565e-06
Os02g0638650	91.6102	3.1409	0.557723	5.63165	1.78498e-08	1.40608e-06
Os03g0225900	312.36	-2.28872	0.406367	-5.63216	1.77967e-08	1.40608e-06
Os03g0729300	2204.49	-1.48394	0.263554	-5.63049	1.797e-08	1.40867e-06
Os04g0430200	312.744	1.0855	0.192815	5.62975	1.80472e-08	1.40867e-06
Os05g0111200	355.872	1.10679	0.196593	5.62983	1.80385e-08	1.40867e-06
Os08g0140300	85.2153	-8.91965	1.58549	-5.62579	1.84658e-08	1.43698e-06
Os04g0365100	31.257	-5.27471	0.937992	-5.6234	1.87233e-08	1.44866e-06
Os04g0515900	55.8264	-3.04927	0.542302	-5.62283	1.87852e-08	1.44866e-06
Os05g0473000	16.2267	-7.42622	1.32061	-5.62331	1.87336e-08	1.44866e-06
Os12g0133100	302.94	2.02306	0.360538	5.61122	2.00902e-08	1.54466e-06
Os04g0154800	76.6001	-3.8464	0.686357	-5.60408	2.09367e-08	1.60016e-06
Os09g0541000	1963.02	1.92983	0.344338	5.60446	2.08901e-08	1.60016e-06
Os02g0242900	30.8113	-6.64139	1.18568	-5.60133	2.12712e-08	1.6209e-06
Os03g0764000	521.5	-2.38087	0.425214	-5.59924	2.15297e-08	1.63574e-06
Os05g0426200	3508.61	-1.11509	0.199405	-5.59209	2.24352e-08	1.69951e-06
Os04g0423100	502.211	1.84697	0.33033	5.59128	2.25408e-08	1.70074e-06
Os08g0190100	19.2516	-7.37669	1.3194	-5.59094	2.25839e-08	1.70074e-06
Os04g0486950	1093.14	-4.00839	0.71739	-5.58746	2.30414e-08	1.73013e-06
Os05g0395000	2759.32	1.41248	0.253383	5.5745	2.48249e-08	1.85861e-06
Os09g0356800	252.521	-3.30638	0.59398	-5.56649	2.59924e-08	1.94037e-06
Os12g0242500	212.054	1.92098	0.345129	5.56596	2.60711e-08	1.94059e-06
Os04g0111200	1022.6	1.21028	0.217572	5.56267	2.65684e-08	1.9719e-06
Os07g0493800	22.689	-7.37639	1.3264	-5.5612	2.6792e-08	1.98276e-06
Os01g0870400	15.8691	7.3453	1.32175	5.55724	2.74079e-08	2.0121e-06
Os04g0412500	965.404	1.30379	0.234605	5.55737	2.73864e-08	2.0121e-06
Os06g0520733	48.0778	3.09044	0.55612	5.55714	2.74235e-08	2.0121e-06
Os08g0374000	205.983	2.71298	0.489086	5.54704	2.90544e-08	2.12569e-06
Os01g0947700	255.561	-1.94466	0.350678	-5.54543	2.9324e-08	2.13932e-06
Os11g0454000	39.3161	8.9405	1.61295	5.54294	2.97433e-08	2.13952e-06
Os03g0412400	77.4942	-3.33347	0.601301	-5.54376	2.96048e-08	2.13952e-06
Os05g0527900	22.0249	4.67646	0.843565	5.54369	2.96159e-08	2.13952e-06
Os09g0425200	31.7792	7.75171	1.39845	5.54308	2.97191e-08	2.13952e-06
Os07g0603800	939.078	-1.5572	0.281662	-5.52861	3.22775e-08	2.31532e-06
Os02g0532500	1540.49	-1.9462	0.352583	-5.51982	3.39344e-08	2.4274e-06
Os04g0691900	87.8757	3.42493	0.62071	5.51777	3.43337e-08	2.44914e-06
Os06g0335900	27.5612	-4.08374	0.740766	-5.51286	3.5305e-08	2.51145e-06
Os08g0203201	68.5079	-7.62337	1.38427	-5.50714	3.64706e-08	2.5872e-06
Os01g0928800	565.843	-1.26759	0.230893	-5.48996	4.02024e-08	2.84407e-06
Os04g0338000	1675.12	1.10074	0.200643	5.48607	4.10964e-08	2.89499e-06
Os05g0324700	56.0462	-7.00233	1.27643	-5.48585	4.11477e-08	2.89499e-06
Os04g0175600	199.134	-1.94046	0.353963	-5.4821	4.20296e-08	2.94093e-06
Os12g0186600	373.442	-3.08127	0.562391	-5.47888	4.28036e-08	2.98695e-06
Os01g0704300	1227.6	-1.31337	0.239834	-5.47616	4.34667e-08	3.025e-06
Os08g0203100	170.907	-7.0855	1.29688	-5.4635	4.66842e-08	3.24014e-06
Os02g0274700	455.724	-1.01294	0.185643	-5.45636	4.85998e-08	3.364e-06
Os10g0511200	27.2943	-4.7381	0.868467	-5.45571	4.87771e-08	3.3672e-06
Os12g0277000	301.494	-1.79347	0.329193	-5.44809	5.09147e-08	3.50533e-06
Os10g0114300	237.905	-2.13342	0.392131	-5.44058	5.31075e-08	3.64653e-06
Os01g0892500	24.9528	-4.14859	0.763027	-5.43701	5.41808e-08	3.7103e-06
Os03g0439500	609.2	1.96734	0.362046	5.43394	5.5123e-08	3.76478e-06
Os01g0650200	1370.82	-1.88521	0.347201	-5.42975	5.64324e-08	3.84399e-06
Os10g0483500	142.659	1.73924	0.320473	5.42709	5.72809e-08	3.89146e-06
Os11g0127800	2279.99	1.30619	0.240724	5.4261	5.75984e-08	3.89529e-06
Os12g0431100	179.541	-4.6385	0.854904	-5.42575	5.77102e-08	3.89529e-06
Os10g0190500	105.025	1.56645	0.28903	5.41969	5.97016e-08	4.01345e-06
Os10g0467900	288.126	-1.12265	0.207337	-5.41463	6.14152e-08	4.11786e-06
Os01g0701700	48.1807	-3.31968	0.61317	-5.41397	6.16423e-08	4.12233e-06
Os11g0625900	67.4535	-4.00561	0.740119	-5.41211	6.22852e-08	4.14374e-06
Os05g0258400	37.9344	-2.90046	0.535889	-5.41242	6.21778e-08	4.14374e-06
Os06g0698748	1903.07	-1.88178	0.347821	-5.41021	6.29507e-08	4.16643e-06
Os01g0223900	70.5201	-2.4765	0.458155	-5.40538	6.46717e-08	4.26933e-06
Os04g0173300	1213.85	-1.58534	0.293368	-5.40392	6.51999e-08	4.29317e-06
Os01g0925100	54.8253	-2.00516	0.371123	-5.40295	6.55547e-08	4.30549e-06
Os05g0287800	561.556	-1.76796	0.327361	-5.40062	6.64096e-08	4.35051e-06
Os07g0680400	105.425	-2.41198	0.447321	-5.39207	6.96517e-08	4.53974e-06
Os02g0600400	389.677	-1.56374	0.29029	-5.38682	7.17144e-08	4.65057e-06
Os11g0474800	68.584	-4.31198	0.801694	-5.37858	7.50744e-08	4.84399e-06
Os03g0223100	382.869	1.98701	0.369524	5.37722	7.56433e-08	4.86331e-06
Os07g0178800	337.056	3.16558	0.588731	5.37696	7.57525e-08	4.86331e-06
Os09g0547500	289.664	-2.24545	0.417697	-5.3758	7.62451e-08	4.88273e-06
Os02g0258800	379.205	3.36925	0.627097	5.37278	7.75327e-08	4.95284e-06
Os01g0583100	974.596	1.91515	0.356565	5.37111	7.82545e-08	4.98654e-06
Os09g0554300	1236.53	-1.18119	0.220508	-5.35666	8.47721e-08	5.38849e-06
Os09g0497000	440.536	1.22615	0.228971	5.35504	8.55376e-08	5.42372e-06
Os12g0628600	1232.17	-3.61339	0.675057	-5.35272	8.66404e-08	5.48011e-06
Os03g0609800	627.004	-1.14079	0.213171	-5.35153	8.72138e-08	5.50283e-06
Os08g0539700	430.024	-2.96943	0.555305	-5.34737	8.92395e-08	5.61684e-06
Os04g0565400	720.76	-1.47312	0.275524	-5.34664	8.9602e-08	5.62587e-06
Os02g0240100	77.8869	-4.55398	0.853342	-5.33664	9.46874e-08	5.90187e-06
Os04g0585900	33.92	3.08307	0.578294	5.33131	9.75048e-08	6.06277e-06
Os12g0556500	109.373	-2.49419	0.468063	-5.32875	9.8889e-08	6.13399e-06
Os12g0441600	548.322	1.16623	0.218931	5.32693	9.98889e-08	6.18108e-06
Os01g0745000	16.1866	-7.47493	1.40343	-5.3262	1.0029e-07	6.19034e-06
Os07g0616500	655.463	1.0893	0.204533	5.32578	1.00521e-07	6.19034e-06
Os01g0303800	376.827	-2.46522	0.463041	-5.32397	1.01524e-07	6.23719e-06
Os03g0291500	1149.39	-3.39575	0.63872	-5.31649	1.05789e-07	6.48367e-06
Os03g0228200	1192.21	2.20691	0.415273	5.31435	1.07037e-07	6.54456e-06
Os10g0490100	61.6113	-4.13616	0.778723	-5.31146	1.08751e-07	6.63355e-06
Os01g0638600	55.0766	2.84329	0.535909	5.30554	1.1234e-07	6.83622e-06
Os10g0501500	2409.54	-1.50568	0.283881	-5.3039	1.13356e-07	6.88174e-06
Os02g0181300	845.047	-2.83878	0.535351	-5.30266	1.14129e-07	6.91233e-06
Os07g0687900	342.533	1.27063	0.23994	5.2956	1.18627e-07	7.16786e-06
Os04g0541700	408.601	2.58461	0.488187	5.29431	1.19469e-07	7.20177e-06
Os03g0691800	150.076	-1.87606	0.35504	-5.28409	1.26328e-07	7.59746e-06
Os10g0570200	69.0791	-4.74318	0.897877	-5.28266	1.27324e-07	7.63945e-06
Os08g0509100	505.585	-2.90093	0.550163	-5.27286	1.34314e-07	8.02138e-06
Os01g0113200	40.4033	-3.17253	0.602384	-5.26662	1.3896e-07	8.27955e-06
Os04g0684100	378.057	-1.8476	0.351083	-5.26258	1.4205e-07	8.44406e-06
Os02g0512000	31.8735	-3.13762	0.596361	-5.26128	1.43058e-07	8.48435e-06
Os08g0192300	29.8575	3.5385	0.673367	5.25494	1.48075e-07	8.76166e-06
Os04g0444800	6446.46	1.00204	0.190776	5.25243	1.50105e-07	8.8614e-06
Os02g0787600	444.714	-1.76844	0.336991	-5.24775	1.53969e-07	9.06863e-06
Os02g0575900	68.3588	-2.31646	0.441535	-5.24638	1.55116e-07	9.07867e-06
Os03g0582000	889.831	1.36586	0.260315	5.24693	1.54657e-07	9.07867e-06
Os06g0167400	311.711	1.12897	0.215195	5.24628	1.552e-07	9.07867e-06
Os02g0135200	206.647	-2.2892	0.437373	-5.23399	1.65888e-07	9.65987e-06
Os02g0625000	3478.07	-1.03391	0.197621	-5.23179	1.6788e-07	9.75372e-06
Os06g0289900	2966.83	2.26409	0.433074	5.22794	1.71405e-07	9.93607e-06
Os10g0509100	3283.84	-1.07341	0.20534	-5.22746	1.71859e-07	9.93993e-06
Os10g0456800	1033.79	-1.33435	0.255286	-5.22688	1.7239e-07	9.94825e-06
Os01g0337500	41.6882	-3.41662	0.654588	-5.2195	1.7941e-07	1.0266e-05
Os01g0750500	166.84	-1.867	0.357648	-5.22021	1.78718e-07	1.0266e-05
Os11g0482200	21.3636	-7.61458	1.4586	-5.22048	1.7846e-07	1.0266e-05
Os05g0171900	910.875	-2.967	0.568455	-5.21941	1.79495e-07	1.0266e-05
Os07g0587500	223.632	-1.40241	0.268779	-5.21771	1.81153e-07	1.03378e-05
Os12g0123200	171.268	-1.63941	0.314355	-5.21517	1.83653e-07	1.04341e-05
Os04g0464100	89.8663	-3.35673	0.643635	-5.21526	1.83557e-07	1.04341e-05
Os05g0421900	529.107	-2.9125	0.558714	-5.21286	1.85948e-07	1.05411e-05
Os02g0513100	45.7493	9.17365	1.76067	5.21032	1.88518e-07	1.06633e-05
Os09g0397300	2257.17	-1.1245	0.215874	-5.20905	1.89815e-07	1.07131e-05
Os02g0774100	263.154	1.72922	0.332353	5.20296	1.96139e-07	1.10457e-05
Os11g0567800	60.4392	-3.84551	0.74097	-5.18983	2.10485e-07	1.18019e-05
Os04g0524600	117.268	-2.90952	0.560619	-5.18985	2.10468e-07	1.18019e-05
Os08g0159500	2110.1	1.05187	0.202881	5.18464	2.16438e-07	1.21092e-05
Os01g0974200	6311.56	1.67414	0.323237	5.17931	2.22711e-07	1.24331e-05
Os04g0542200	277.807	2.27831	0.440011	5.17785	2.24458e-07	1.25034e-05
Os02g0629000	100.652	-2.49957	0.484874	-5.1551	2.53493e-07	1.40903e-05
Os06g0120200	258.747	1.69247	0.328562	5.15114	2.58908e-07	1.43292e-05
Os11g0625801	35.7121	-3.77787	0.733482	-5.15061	2.59647e-07	1.43392e-05
Os09g0442600	2102.26	-1.58063	0.307481	-5.14059	2.73878e-07	1.50927e-05
Os04g0391500	1086.4	-1.62109	0.315412	-5.13961	2.75307e-07	1.5139e-05
Os08g0356500	240.833	-1.70698	0.332255	-5.13758	2.78303e-07	1.5271e-05
Os08g0547300	132.013	1.66702	0.324989	5.12945	2.90594e-07	1.59114e-05
Os02g0314300	673.136	3.16024	0.616966	5.12223	3.01943e-07	1.64976e-05
Os04g0487200	1039.42	-1.00085	0.195869	-5.10977	3.22544e-07	1.75858e-05
Os03g0225700	318.756	-1.71334	0.335363	-5.10893	3.23991e-07	1.76273e-05
Os04g0295400	222.84	1.23812	0.242825	5.09882	3.41772e-07	1.85554e-05
Os11g0558900	32.3747	-8.71092	1.71088	-5.09148	3.55285e-07	1.92484e-05
Os02g0769800	120.213	-1.58636	0.312389	-5.07815	3.81138e-07	2.05622e-05
Os10g0127900	259.502	-2.13353	0.420312	-5.07606	3.85337e-07	2.07452e-05
Os12g0515500	277.336	1.44336	0.284441	5.07437	3.88779e-07	2.08867e-05
Os01g0274100	22.6428	3.94228	0.777282	5.07188	3.93915e-07	2.11184e-05
Os08g0203600	1824.59	-1.77716	0.350565	-5.06942	3.99023e-07	2.13477e-05
Os09g0346600	224.904	-1.32461	0.261736	-5.06087	4.17339e-07	2.22812e-05
Os09g0472700	74.8481	-3.96214	0.783495	-5.05701	4.25882e-07	2.26902e-05
Os09g0325700	133.105	3.60794	0.713561	5.05624	4.27611e-07	2.27351e-05
Os04g0608600	103.853	-2.67847	0.532114	-5.03363	4.81266e-07	2.55349e-05
Os01g0826000	71.9622	2.83132	0.563206	5.02715	4.97832e-07	2.63594e-05
Os02g0132500	2049.24	-1.31364	0.261391	-5.02557	5.01928e-07	2.65216e-05
Os10g0140700	301.064	1.98956	0.396342	5.01982	5.17207e-07	2.72729e-05
Os05g0278500	101.529	-2.14544	0.427483	-5.01877	5.20044e-07	2.73663e-05
Os12g0106000	3416.31	1.78524	0.356132	5.01287	5.36249e-07	2.81038e-05
Os04g0546800	1819.04	-1.86431	0.372143	-5.00966	5.45261e-07	2.84141e-05
Os05g0460000	441.884	1.96268	0.391785	5.00958	5.45488e-07	2.84141e-05
Os07g0683200	611.228	-2.32726	0.46453	-5.00992	5.44535e-07	2.84141e-05
Os04g0338100	1647.51	1.20441	0.240586	5.00615	5.55286e-07	2.88659e-05
Os01g0731100	441.747	-3.36712	0.672661	-5.00567	5.56693e-07	2.88805e-05
Os05g0150733	99.4817	1.20509	0.240906	5.00231	5.66473e-07	2.93287e-05
Os03g0684700	574.45	1.71273	0.342415	5.0019	5.67673e-07	2.93317e-05
Os06g0125500	1401.44	-1.55918	0.311858	-4.99966	5.74301e-07	2.95552e-05
Os08g0351300	207.269	-4.05133	0.810261	-5.00003	5.73213e-07	2.95552e-05
Os11g0133001	80.2097	-3.9839	0.7971	-4.998	5.7929e-07	2.97523e-05
Os05g0417600	286.587	-2.131	0.426693	-4.99423	5.90704e-07	3.0278e-05
Os04g0122000	254.541	-2.01231	0.403888	-4.98235	6.28164e-07	3.2134e-05
Os06g0110000	571.06	-1.36364	0.273882	-4.97891	6.39423e-07	3.26449e-05
Os06g0114400	56.8135	2.63354	0.529999	4.96896	6.73139e-07	3.42301e-05
Os11g0628000	30.5392	-2.39776	0.482648	-4.96792	6.76764e-07	3.43464e-05
Os02g0201300	144.892	-1.20173	0.242221	-4.96128	7.00297e-07	3.54706e-05
Os07g0639400	33.2316	4.45436	0.897955	4.96056	7.02899e-07	3.55324e-05
Os05g0554000	386.959	-1.19241	0.240552	-4.95695	7.16078e-07	3.61275e-05
Os04g0647800	1087.29	-1.25714	0.253736	-4.95455	7.24992e-07	3.65055e-05
Os03g0388100	634.027	1.07864	0.217879	4.95062	7.39763e-07	3.70314e-05
Os04g0525100	213.21	-2.21523	0.447685	-4.9482	7.49029e-07	3.73497e-05
Os04g0616300	945.084	-1.53641	0.31057	-4.94706	7.53443e-07	3.74244e-05
Os07g0530700	651.798	1.03502	0.209212	4.94725	7.52702e-07	3.74244e-05
Os01g0382000	354.191	-7.06527	1.42884	-4.94477	7.62351e-07	3.77938e-05
Os03g0371350	162.926	2.25842	0.457051	4.94129	7.76072e-07	3.8326e-05
Os04g0573900	328.893	-1.30842	0.264783	-4.9415	7.75245e-07	3.8326e-05
Os01g0858900	275.879	-1.34198	0.271736	-4.93855	7.87054e-07	3.87937e-05
Os04g0538400	21.9333	-4.92235	0.997375	-4.9353	8.00269e-07	3.93696e-05
Os07g0509800	3508.09	1.64269	0.333049	4.93227	8.12806e-07	3.98482e-05
Os03g0261100	734.654	1.56037	0.316415	4.93142	8.1635e-07	3.98553e-05
Os03g0679700	3117.94	1.70291	0.345295	4.93177	8.14897e-07	3.98553e-05
Os04g0635650	303.287	-3.07005	0.6233	-4.92548	8.4155e-07	4.10076e-05
Os04g0468600	399.87	-3.44625	0.701302	-4.91407	8.92027e-07	4.33849e-05
Os05g0550000	1261.26	-1.01432	0.206523	-4.91142	9.042e-07	4.38939e-05
Os05g0550800	50.1501	-1.84223	0.37522	-4.90973	9.11996e-07	4.41888e-05
Os01g0660200	420.653	-2.95743	0.6025	-4.9086	9.17283e-07	4.43612e-05
Os12g0565166	39.6259	-3.30856	0.674315	-4.90655	9.26945e-07	4.47442e-05
Os03g0184550	137.282	-2.5057	0.511095	-4.90261	9.45725e-07	4.55652e-05
Os12g0582666	85.0986	-2.23862	0.457022	-4.89828	9.66807e-07	4.64936e-05
Os03g0411600	142.186	-1.3603	0.277869	-4.89546	9.80747e-07	4.6988e-05
Os06g0652300	24.4618	5.87575	1.20091	4.89274	9.94399e-07	4.75534e-05
Os03g0657100	411.918	-1.40509	0.287627	-4.88513	1.03363e-06	4.93374e-05
Os07g0639500	24.7826	7.25545	1.48573	4.88343	1.04256e-06	4.96713e-05
Os04g0423400	2916.48	1.68749	0.345717	4.88113	1.05482e-06	5.01625e-05
Os01g0276900	169.267	1.40459	0.287783	4.88072	1.05699e-06	5.01727e-05
Os01g0217500	93.0542	-2.61107	0.535208	-4.87861	1.06836e-06	5.06191e-05
Os07g0645300	45.0818	2.67001	0.548042	4.87191	1.10522e-06	5.2269e-05
Os03g0586400	136.736	1.30559	0.268416	4.86404	1.15016e-06	5.41946e-05
Os12g0576700	302.934	-2.07237	0.426515	-4.85884	1.18075e-06	5.53315e-05
Os05g0380300	422.249	-1.88295	0.387524	-4.85893	1.18022e-06	5.53315e-05
Os02g0535901	41.9066	-4.4361	0.913732	-4.85493	1.20431e-06	5.63327e-05
Os12g0218600	3.34282	21.2989	4.39133	4.85021	1.23329e-06	5.75834e-05
Os02g0703300	294.012	-1.32728	0.273728	-4.84889	1.24154e-06	5.78634e-05
Os07g0677100	113.715	-4.08763	0.84318	-4.84787	1.24792e-06	5.80554e-05
Os07g0638400	203.575	3.35022	0.692096	4.84068	1.29393e-06	6.00872e-05
Os01g0947800	17.8769	-2.71612	0.561345	-4.8386	1.30756e-06	6.06104e-05
Os06g0651200	108.196	3.17719	0.657324	4.83353	1.34135e-06	6.20647e-05
Os06g0702000	48.9669	-1.54716	0.320215	-4.83162	1.35428e-06	6.25501e-05
Os04g0468000	253.761	-5.96488	1.23591	-4.82631	1.39087e-06	6.40101e-05
Os11g0247000	330.664	-1.94768	0.403615	-4.82559	1.39589e-06	6.41259e-05
Os08g0412700	94.8503	3.25378	0.675182	4.81912	1.44196e-06	6.6124e-05
Os01g0238500	11867	1.37068	0.28446	4.81851	1.44633e-06	6.62065e-05
Os05g0577700	535.073	-1.3133	0.272644	-4.81693	1.45786e-06	6.64972e-05
Os08g0171700	263.871	1.15081	0.238894	4.81722	1.45572e-06	6.64972e-05
Os05g0267900	211.392	-1.07821	0.223902	-4.81554	1.46805e-06	6.6725e-05
Os01g0229600	570.418	2.12313	0.441038	4.81393	1.47988e-06	6.71437e-05
Os02g0209300	88.2972	-2.97501	0.61808	-4.8133	1.48459e-06	6.72384e-05
Os02g0216300	5914.91	-1.62222	0.337505	-4.8065	1.53595e-06	6.94421e-05
Os11g0207200	2735.67	-1.21854	0.253836	-4.80052	1.58258e-06	7.14247e-05
Os01g0218100	265.463	2.20981	0.460651	4.79714	1.60946e-06	7.25104e-05
Os04g0444300	70.5642	-4.02139	0.838353	-4.79677	1.61245e-06	7.25181e-05
Os01g0859200	2004.4	-1.49357	0.311603	-4.79318	1.64162e-06	7.35719e-05
Os12g0115500	4208.39	1.13803	0.237412	4.79349	1.63906e-06	7.35719e-05
Os04g0458300	266.682	-1.60445	0.33489	-4.79098	1.65966e-06	7.42508e-05
Os02g0526400	2096.07	-2.23899	0.467394	-4.79038	1.6647e-06	7.43469e-05
Os12g0512800	18.3204	-6.53934	1.36523	-4.78993	1.66841e-06	7.43612e-05
Os08g0523200	20.1381	6.83271	1.42656	4.78964	1.67081e-06	7.43612e-05
Os10g0395000	130.023	-1.93444	0.404365	-4.7839	1.71927e-06	7.63855e-05
Os06g0557100	722.875	-1.75924	0.368021	-4.78028	1.75051e-06	7.76393e-05
Os04g0442300	542.732	1.48828	0.311436	4.77876	1.76376e-06	7.80918e-05
Os01g0638000	135.588	4.0834	0.856705	4.7664	1.8755e-06	8.27541e-05
Os12g0594000	72.6521	2.13699	0.448555	4.76417	1.89631e-06	8.35288e-05
Os09g0571200	264.485	-2.99195	0.628113	-4.7634	1.90358e-06	8.37051e-05
Os11g0139700	1875.91	-1.1232	0.235846	-4.76242	1.91283e-06	8.39685e-05
Os03g0437200	48.9051	-5.77467	1.21299	-4.76071	1.92917e-06	8.45412e-05
Os04g0584600	2727.83	-1.20814	0.253938	-4.75762	1.95887e-06	8.56962e-05
Os01g0669100	314.099	-2.31982	0.487716	-4.75651	1.96971e-06	8.6024e-05
Os05g0195700	325.01	1.10318	0.232107	4.75287	2.00546e-06	8.74366e-05
Os09g0511200	24.2821	3.71952	0.782838	4.75133	2.02087e-06	8.79593e-05
Os02g0689900	281.118	-1.35788	0.286309	-4.7427	2.10888e-06	9.16344e-05
Os02g0275200	742.36	-1.83372	0.386712	-4.74182	2.11806e-06	9.18779e-05
Os03g0195300	122.654	2.17381	0.45879	4.73815	2.1568e-06	9.32437e-05
Os04g0619400	293.121	-1.44619	0.30521	-4.73836	2.15459e-06	9.32437e-05
Os06g0699301	92.069	-2.00196	0.422565	-4.73764	2.16226e-06	9.33223e-05
Os04g0128700	27.1089	-4.84752	1.02367	-4.73544	2.1858e-06	9.41803e-05
Os03g0187800	17.4144	-6.39129	1.34988	-4.73473	2.19348e-06	9.43525e-05
Os06g0561000	601.004	-1.38485	0.292753	-4.73044	2.24038e-06	9.62088e-05
Os09g0322400	55.1844	-2.23094	0.472397	-4.7226	2.32845e-06	9.96575e-05
Os01g0172100	531.263	1.34357	0.284643	4.72021	2.35603e-06	0.000100503
Os03g0817200	451.442	-2.02738	0.430273	-4.71184	2.45491e-06	0.000104547
Os05g0409500	206.615	-2.48746	0.527979	-4.71127	2.46173e-06	0.000104664
Os02g0740500	50.4692	3.29099	0.699051	4.70779	2.50412e-06	0.000106291
Os01g0908600	462.738	1.09765	0.233828	4.69427	2.67557e-06	0.000113008
Os10g0537800	61.1392	-6.26671	1.33642	-4.68918	2.74302e-06	0.000115666
Os09g0483400	54.0753	5.31056	1.13296	4.68734	2.76775e-06	0.000116518
Os08g0526633	75.7304	-2.24462	0.478905	-4.68699	2.77255e-06	0.000116529
Os11g0676500	42.9665	-2.63045	0.561359	-4.68586	2.78787e-06	0.000116981
Os04g0366000	64.773	-4.98449	1.06402	-4.68459	2.80526e-06	0.000117519
Os03g0261800	531.872	1.22852	0.262483	4.68037	2.86354e-06	0.000119765
Os06g0642500	388.705	-1.29885	0.277688	-4.67738	2.90565e-06	0.000121132
Os06g0604300	72.1166	1.495	0.319723	4.67592	2.92644e-06	0.000121801
Os09g0128400	1456.94	-1.25251	0.268066	-4.67239	2.97708e-06	0.000123708
Os04g0513400	217.93	2.58677	0.553988	4.66936	3.02145e-06	0.000124933
Os08g0458200	116.311	2.05773	0.440717	4.66905	3.02601e-06	0.000124933
Os09g0353200	61.0926	-3.07848	0.65945	-4.66825	3.03775e-06	0.000125216
Os10g0491450	23.0337	-5.7801	1.24114	-4.6571	3.20688e-06	0.000131764
Os05g0414200	359.598	-1.47114	0.31601	-4.65534	3.2344e-06	0.000132683
Os01g0949800	26.6776	8.19471	1.76184	4.65123	3.29962e-06	0.000135142
Os03g0610400	111.044	-2.4309	0.522707	-4.65061	3.30954e-06	0.000135333
Os02g0787300	720.648	-1.63052	0.35063	-4.65028	3.31489e-06	0.000135336
Os11g0444700	974.343	-2.55188	0.549395	-4.64489	3.4025e-06	0.000138692
Os05g0499800	239.729	1.4187	0.305722	4.64047	3.47612e-06	0.000141005
Os05g0569300	480.481	-1.22732	0.264476	-4.64056	3.47459e-06	0.000141005
Os06g0524400	238.858	1.92817	0.415567	4.63985	3.48669e-06	0.000141005
Os06g0602500	221.685	-1.60033	0.344876	-4.64031	3.47885e-06	0.000141005
Os06g0650900	1095.61	-1.31807	0.284099	-4.63946	3.49329e-06	0.00014105
Os10g0163220	69.1285	-1.66472	0.358871	-4.63878	3.50478e-06	0.000141292
Os10g0552600	49.8559	-3.10071	0.669159	-4.63374	3.59116e-06	0.000144547
Os11g0586300	112.844	1.34096	0.289446	4.63284	3.60681e-06	0.000144723
Os03g0660500	15.6013	-6.5988	1.42566	-4.62858	3.68187e-06	0.000147504
Os02g0186800	111.732	1.96953	0.425568	4.62801	3.69204e-06	0.000147653
Os04g0680400	656.9	-1.52176	0.328835	-4.62772	3.69708e-06	0.000147653
Os01g0365000	26.2949	-4.10585	0.887997	-4.62372	3.76911e-06	0.000149652
Os03g0650200	316.068	2.07551	0.448851	4.62404	3.76336e-06	0.000149652
Os07g0124100	307.691	-1.55738	0.336829	-4.62365	3.77043e-06	0.000149652
Os12g0552400	232.675	-1.41961	0.307197	-4.62116	3.81592e-06	0.000151223
Os06g0128800	50.3524	-4.45722	0.964821	-4.61974	3.84229e-06	0.000152034
Os09g0343200	4899.98	-1.66979	0.361627	-4.61744	3.88498e-06	0.000153487
Os03g0122300	286.069	-1.93121	0.418295	-4.61686	3.89585e-06	0.00015368
Os05g0531000	214.534	2.1228	0.459958	4.61521	3.92696e-06	0.000154669
Os11g0575600	30.4376	-2.13217	0.462152	-4.61356	3.95836e-06	0.000155549
Os02g0681200	411.591	-1.31364	0.284917	-4.61059	4.01524e-06	0.000157182
Os05g0485300	148.336	-2.12266	0.460526	-4.6092	4.04217e-06	0.000157995
Os05g0344200	4950.69	-1.70737	0.370901	-4.60331	4.1583e-06	0.000162041
Os01g0124100	211.903	-3.91854	0.852053	-4.59894	4.24653e-06	0.000165229
Os05g0384300	45.8687	-4.90582	1.06688	-4.59827	4.26017e-06	0.000165508
Os11g0156300	102.868	-1.32125	0.287368	-4.59775	4.27079e-06	0.000165671
Os10g0558700	232.82	-2.99784	0.652534	-4.59415	4.34516e-06	0.000168301
Os10g0181100	18.9564	-3.84648	0.83796	-4.5903	4.4262e-06	0.000171182
Os01g0742400	181.713	-2.68586	0.585583	-4.58664	4.50431e-06	0.000173773
Os02g0590400	1624.27	1.05152	0.229264	4.58653	4.50674e-06	0.000173773
Os04g0136700	910.417	1.40973	0.307403	4.58595	4.51935e-06	0.000173998
Os03g0676400	37.4169	-2.88231	0.629206	-4.58087	4.63053e-06	0.000178012
Os04g0590400	348.233	-1.16461	0.254484	-4.57635	4.7316e-06	0.000181355
Os09g0514700	175.453	-1.01443	0.221656	-4.57658	4.72634e-06	0.000181355
Os01g0246700	783.708	-2.04605	0.447158	-4.57568	4.74681e-06	0.000181666
Os07g0413800	2254.98	2.11418	0.462576	4.57045	4.86685e-06	0.000185983
Os08g0423600	25.5081	-6.91245	1.51314	-4.56828	4.91752e-06	0.00018764
Os07g0181100	22.1857	-6.33248	1.3869	-4.56593	4.97278e-06	0.000189467
Os11g0428500	25.7614	2.82772	0.619802	4.56229	5.05978e-06	0.000192497
Os08g0203150	73.7937	-4.74285	1.04048	-4.55831	5.15666e-06	0.000195603
Os01g0841700	90.6237	-2.81413	0.61833	-4.55117	5.33482e-06	0.000201764
Os07g0614000	624.837	2.16422	0.475514	4.55132	5.33096e-06	0.000201764
Os06g0166400	377.644	-1.84706	0.405928	-4.55023	5.35884e-06	0.000202375
Os07g0528200	16.8017	-6.2334	1.37067	-4.54771	5.42336e-06	0.000204511
Os09g0305300	112.251	1.80281	0.397007	4.54101	5.59852e-06	0.000210498
Os12g0632800	956.179	-1.91155	0.421248	-4.53782	5.68386e-06	0.000213394
Os04g0363700	268.705	1.01358	0.22357	4.53363	5.79789e-06	0.000217357
Os04g0288100	75.9697	-5.12797	1.13188	-4.5305	5.88437e-06	0.000220278
Os03g0772600	614.437	-1.85544	0.409621	-4.52965	5.90805e-06	0.000220842
Os08g0526400	521.592	-1.63553	0.361366	-4.52597	6.01185e-06	0.000224396
Os05g0215300	219.058	1.10073	0.243235	4.52537	6.02889e-06	0.000224705
Os06g0725200	161.745	-1.66526	0.36818	-4.52294	6.09872e-06	0.000226976
Os09g0334500	1132.95	-1.51066	0.334022	-4.52263	6.10749e-06	0.000226976
Os12g0617400	15.4921	4.72274	1.04461	4.52107	6.15277e-06	0.000227999
Os07g0162600	537.388	-1.9241	0.425576	-4.52116	6.15011e-06	0.000227999
Os01g0949900	23.1967	3.49313	0.773007	4.51889	6.2166e-06	0.000230032
Os06g0335950	34.6107	-3.65971	0.809936	-4.51852	6.22724e-06	0.000230094
Os04g0429600	24.3046	4.96585	1.09935	4.51709	6.26948e-06	0.000231322
Os05g0104200	23.4291	-4.64043	1.0287	-4.51096	6.45357e-06	0.000237432
Os03g0834050	142.312	-2.26407	0.50206	-4.50956	6.49618e-06	0.000238658
Os01g0134700	131.577	-2.90342	0.644116	-4.5076	6.55655e-06	0.000240189
Os05g0111300	2835.44	1.90578	0.422784	4.5077	6.55326e-06	0.000240189
Os08g0448000	96.6503	-2.91942	0.647954	-4.50559	6.61877e-06	0.000242123
Os01g0314800	3983.98	2.46034	0.546145	4.50492	6.63993e-06	0.000242551
Os12g0637100	509.795	-1.01996	0.226478	-4.50357	6.68211e-06	0.000243745
Os11g0569500	93.1436	-2.60367	0.578189	-4.50315	6.69545e-06	0.000243885
Os11g0475000	13.3147	-6.42911	1.42934	-4.49797	6.86056e-06	0.000249192
Os10g0165300	33.1457	3.20176	0.712358	4.49459	6.97037e-06	0.000252824
Os02g0669366	58.1736	-2.92708	0.651357	-4.49382	6.99583e-06	0.000253389
Os03g0320100	343.701	-1.65264	0.367789	-4.49344	7.00809e-06	0.000253476
Os04g0627900	17.2738	6.24092	1.38904	4.49299	7.02314e-06	0.000253663
Os01g0628700	1618.9	-1.38564	0.308451	-4.49226	7.04724e-06	0.000254176
Os01g0731201	155.951	-1.79771	0.401383	-4.4788	7.50632e-06	0.000268846
Os05g0488600	266.839	1.60077	0.357397	4.47895	7.50101e-06	0.000268846
Os05g0582350	515.713	1.17843	0.263097	4.47905	7.49752e-06	0.000268846
Os06g0335975	23.9739	-4.03116	0.899943	-4.47935	7.48701e-06	0.000268846
Os07g0475900	778.784	-1.34504	0.300391	-4.47764	7.5472e-06	0.000269933
Os01g0150900	114.16	1.67313	0.374014	4.47344	7.69729e-06	0.000274696
Os08g0331800	60.5874	-5.75133	1.28635	-4.47105	7.78367e-06	0.000277232
Os09g0286600	2412.42	-1.29945	0.290882	-4.46728	7.92214e-06	0.000281774
Os04g0480200	61.0511	-3.58075	0.801706	-4.46641	7.95441e-06	0.00028253
Os10g0360600	1178.99	-1.01569	0.227551	-4.46355	8.06145e-06	0.000285937
Os10g0578800	2815.91	-1.68006	0.377443	-4.45116	8.54096e-06	0.000301694
Os01g0704100	12.5179	-5.17187	1.16264	-4.44838	8.65192e-06	0.000304989
Os07g0542400	2445.88	-3.45353	0.777893	-4.43959	9.01293e-06	0.000317057
Os06g0256500	1307.64	1.60574	0.361852	4.43756	9.09864e-06	0.000318763
Os03g0724500	60.8469	3.23116	0.728877	4.43306	9.29042e-06	0.000325038
Os08g0507701	25.1068	-3.21065	0.724366	-4.43235	9.32099e-06	0.000325664
Os03g0148700	289.759	-1.14277	0.257996	-4.42943	9.44817e-06	0.000329212
Os07g0654500	96.0746	-2.69765	0.608991	-4.42971	9.43592e-06	0.000329212
Os10g0109600	76.1275	-4.57806	1.03379	-4.4284	9.49335e-06	0.000330338
Os02g0213100	65.35	-2.79823	0.632034	-4.42734	9.54012e-06	0.000331516
Os07g0689600	434.842	2.6657	0.603362	4.41808	9.95832e-06	0.00034558
Os03g0182000	12.3275	7.01168	1.58738	4.41713	1.00019e-05	0.000346625
Os11g0459600	108.881	-1.78528	0.404224	-4.41655	1.0029e-05	0.000347095
Os01g0389700	224.289	-2.12321	0.480931	-4.41478	1.01113e-05	0.000349474
Os04g0688300	627.751	-1.64335	0.37231	-4.41393	1.01512e-05	0.00035038
Os10g0559200	80.1713	1.91667	0.434426	4.41198	1.02432e-05	0.00035308
Os03g0655400	6871.01	1.15251	0.261506	4.40719	1.04718e-05	0.000359034
Os08g0531000	49.8685	2.89925	0.657806	4.40746	1.0459e-05	0.000359034
Os08g0388900	9.00842	-6.98044	1.5846	-4.40518	1.05698e-05	0.000361911
Os05g0579600	617.682	1.13967	0.258742	4.40465	1.05953e-05	0.000362301
Os02g0483500	502.993	-1.59641	0.362467	-4.40429	1.06132e-05	0.00036243
Os11g0173100	10.4193	-4.51633	1.02683	-4.39831	1.09098e-05	0.00037157
Os10g0109300	5058.4	-1.32269	0.301025	-4.39396	1.11306e-05	0.000378304
Os02g0803600	18.3514	2.85952	0.650804	4.39383	1.1137e-05	0.000378304
Os04g0121800	174.462	-3.18796	0.726846	-4.38601	1.15449e-05	0.000391125
Os03g0371400	270.591	2.89234	0.660252	4.38066	1.18319e-05	0.00040032
Os06g0115300	399.09	1.00631	0.230118	4.37301	1.22543e-05	0.000412439
Os10g0536400	357.63	-2.02073	0.462441	-4.36969	1.24421e-05	0.000418211
Os10g0416500	748.918	-5.03212	1.15194	-4.36838	1.2517e-05	0.000420177
Os09g0442400	224.632	2.22585	0.509765	4.36643	1.26293e-05	0.000423394
Os06g0558300	152.179	-2.43955	0.558753	-4.36605	1.26513e-05	0.000423578
Os06g0530600	85.6697	-4.23918	0.971302	-4.36443	1.27453e-05	0.000426172
Os05g0343400	3556.78	-1.21544	0.278528	-4.36378	1.27835e-05	0.000426891
Os11g0526000	49.5693	1.90929	0.437692	4.36218	1.28772e-05	0.000429463
Os10g0389150	204.6	1.17644	0.269795	4.36052	1.29755e-05	0.000432181
Os10g0521000	69.5065	2.61668	0.600252	4.35929	1.30482e-05	0.000433788
Os11g0209000	2621.36	1.44365	0.331444	4.35565	1.32671e-05	0.000439613
Os02g0654700	147.901	-2.36046	0.542332	-4.35242	1.34642e-05	0.000444996
Os03g0815100	1238.7	-2.12312	0.487953	-4.35106	1.3548e-05	0.000447188
Os11g0543500	715.25	1.14834	0.264057	4.34884	1.3686e-05	0.000450586
Os05g0519200	1191.95	-1.18826	0.273263	-4.34842	1.37125e-05	0.000450878
Os10g0553800	1231.42	1.02513	0.23592	4.34525	1.39119e-05	0.000456266
Os04g0109100	27.1936	-5.36335	1.23447	-4.34465	1.39497e-05	0.000456922
Os02g0617800	1010.89	1.22689	0.282705	4.33984	1.42589e-05	0.000465271
Os01g0175100	488.369	-2.00641	0.462521	-4.33798	1.438e-05	0.000467441
Os03g0223400	1099.93	-1.19825	0.276486	-4.33383	1.46538e-05	0.000475738
Os12g0639600	328.593	-1.97936	0.456787	-4.33322	1.46942e-05	0.000475847
Os12g0133300	28.0424	3.58733	0.827978	4.33264	1.47329e-05	0.000476501
Os11g0547800	68.4625	2.47905	0.572594	4.32951	1.49443e-05	0.000482729
Os06g0640599	31.4453	4.01248	0.92719	4.32756	1.50768e-05	0.000485786
Os03g0848700	902.379	-1.44918	0.33498	-4.32615	1.51739e-05	0.000488304
Os01g0930800	1547.4	1.34286	0.310601	4.32343	1.53621e-05	0.00049374
Os09g0572000	22.5263	-3.52627	0.816366	-4.31947	1.56403e-05	0.000501426
Os05g0116100	1215.73	1.40004	0.324183	4.31868	1.56966e-05	0.000502605
Os03g0314500	563.683	-2.37801	0.550676	-4.31835	1.57202e-05	0.000502732
Os05g0487300	116.559	1.24996	0.289647	4.31547	1.59264e-05	0.000508695
Os03g0660400	11.4774	-6.68023	1.5483	-4.31454	1.59933e-05	0.000510005
Os09g0460300	123.621	2.1736	0.503806	4.31435	1.60072e-05	0.000510005
Os06g0220800	183.412	-1.29481	0.300302	-4.31169	1.62012e-05	0.000514909
Os01g0837000	254.64	-1.64113	0.380682	-4.31102	1.62507e-05	0.000515843
Os10g0551800	42.1358	-3.28322	0.761659	-4.31062	1.628e-05	0.000516137
Os01g0216000	36.9114	-3.08665	0.716184	-4.30985	1.63364e-05	0.000517286
Os03g0348200	66.3058	3.59364	0.834118	4.30831	1.64505e-05	0.000518978
Os06g0232100	1267.38	-1.42543	0.330847	-4.30842	1.64427e-05	0.000518978
Os08g0185701	51.4318	-3.4436	0.799255	-4.30851	1.64356e-05	0.000518978
Os12g0555200	409.375	-4.65129	1.08027	-4.30569	1.66469e-05	0.000523248
Os11g0661800	121.05	-2.21409	0.514786	-4.301	1.7003e-05	0.000533787
Os11g0700900	185.673	-3.53761	0.823949	-4.29348	1.7589e-05	0.00055151
Os12g0630100	192.226	-2.12971	0.49684	-4.28651	1.81498e-05	0.000567707
Os04g0147600	104.212	1.01459	0.236685	4.28666	1.81378e-05	0.000567707
Os11g0498600	100.644	1.81288	0.423226	4.28348	1.83996e-05	0.00057412
Os11g0567600	49.67	-2.46147	0.574695	-4.28308	1.84321e-05	0.000574436
Os08g0485700	679.983	-1.03058	0.240748	-4.28075	1.86264e-05	0.000579789
Os01g0908200	3910.04	-1.27967	0.298979	-4.28015	1.86769e-05	0.000580656
Os07g0673400	286.386	-1.4582	0.340933	-4.27708	1.89358e-05	0.000587285
Os08g0530801	48.0929	3.40567	0.796214	4.27732	1.89154e-05	0.000587285
Os01g0823600	782.287	1.61147	0.377012	4.27432	1.91723e-05	0.000593903
Os02g0282000	44.9976	-2.45895	0.575773	-4.2707	1.94864e-05	0.000602904
Os04g0171800	60.1549	3.12064	0.73078	4.27028	1.95225e-05	0.000603295
Os08g0465800	1686.16	1.03368	0.242137	4.26899	1.96357e-05	0.000605335
Os09g0460400	27.9057	2.32807	0.545418	4.26842	1.96866e-05	0.000606177
Os03g0837900	143.524	1.31241	0.307497	4.26806	1.97182e-05	0.000606423
Os01g0972200	27.4908	-2.13108	0.500027	-4.26192	2.02676e-05	0.000621598
Os01g0706900	222.928	1.42827	0.335605	4.2558	2.08299e-05	0.00063744
Os05g0181300	23.3716	-3.06618	0.720508	-4.25558	2.08508e-05	0.00063744
Os09g0287000	1861.78	-1.64148	0.385999	-4.25255	2.11354e-05	0.000644604
Os05g0491200	654.09	-1.50777	0.354771	-4.24997	2.13803e-05	0.0006513
Os03g0757000	622.414	-2.48006	0.583804	-4.2481	2.15588e-05	0.000655958
Os01g0912850	30.7419	-4.6022	1.08364	-4.24697	2.16681e-05	0.000658506
Os11g0609500	9.52846	-6.36122	1.49831	-4.24558	2.18025e-05	0.000661807
Os04g0165700	2159.24	1.00546	0.2369	4.24426	2.19321e-05	0.000664953
Os01g0818600	471.096	1.06574	0.251211	4.24239	2.21151e-05	0.000669711
Os05g0423701	9.24485	-5.91021	1.39333	-4.24179	2.21747e-05	0.000670727
Os01g0221100	655.426	-1.23443	0.291231	-4.23867	2.24851e-05	0.000679316
Os08g0482600	308.497	-3.74203	0.883443	-4.23574	2.27803e-05	0.000687423
Os06g0267500	264.046	-1.3855	0.327521	-4.23027	2.33408e-05	0.00070351
Os05g0370700	32.9279	-5.37568	1.27132	-4.22842	2.3534e-05	0.000708502
Os04g0387000	84.7383	-2.38916	0.56521	-4.22704	2.3679e-05	0.000712033
Os12g0152100	117.569	1.38123	0.326791	4.22666	2.37184e-05	0.000712385
Os01g0178900	125.965	-1.57421	0.372507	-4.22598	2.37898e-05	0.000713695
Os03g0184100	83.9178	1.9646	0.464928	4.2256	2.3831e-05	0.000714096
Os01g0122000	168.345	1.77101	0.419384	4.22288	2.41204e-05	0.000721926
Os10g0479100	165.095	1.33646	0.316756	4.21922	2.45151e-05	0.0007327
Os10g0508700	3436.79	-1.24972	0.296211	-4.21901	2.45375e-05	0.0007327
Os05g0517200	1291.86	-1.26469	0.299836	-4.21793	2.46553e-05	0.000735363
Os01g0123900	2154.57	2.02592	0.480527	4.21604	2.48633e-05	0.000740708
Os05g0574400	10221.8	1.08588	0.257672	4.21419	2.50679e-05	0.000745073
Os02g0633066	44.0907	-3.67374	0.872016	-4.21293	2.52082e-05	0.000748379
Os01g0916100	102.596	-3.59486	0.853873	-4.21007	2.55294e-05	0.000757039
Os03g0255900	91.453	-3.74962	0.891546	-4.20575	2.60217e-05	0.000770745
Os02g0134400	197.305	-1.48002	0.352311	-4.2009	2.6585e-05	0.00078562
Os04g0630400	338.166	1.5811	0.377015	4.19372	2.74415e-05	0.000809305
Os08g0386200	274.32	-2.15878	0.514772	-4.19365	2.74496e-05	0.000809305
Os07g0674100	465.616	1.41791	0.338149	4.19314	2.75121e-05	0.000810218
Os06g0107100	754.286	1.85588	0.442642	4.19274	2.75611e-05	0.000810731
Os03g0400800	39.4937	-2.46635	0.588429	-4.19142	2.7722e-05	0.000814532
Os04g0532400	1057.53	1.77649	0.424168	4.18817	2.81215e-05	0.000824384
Os05g0500200	93.4974	2.04134	0.487618	4.18635	2.83473e-05	0.000830056
Os07g0690900	79.6182	-2.00945	0.480095	-4.18553	2.845e-05	0.000832113
Os01g0720400	272.276	-1.64662	0.393466	-4.18491	2.85277e-05	0.000833436
Os07g0417200	8.87622	-6.32672	1.51235	-4.18338	2.87208e-05	0.000838126
Os02g0584700	173.618	-2.02806	0.48546	-4.1776	2.94599e-05	0.000856772
Os10g0144700	53.5092	3.76871	0.902388	4.17638	2.96187e-05	0.000860415
Os05g0427100	669.723	-1.28209	0.307068	-4.17528	2.97615e-05	0.000861891
Os10g0419400	76.9527	-2.1008	0.504128	-4.16719	3.08373e-05	0.000890955
Os11g0546300	267.021	1.04256	0.250186	4.16715	3.08434e-05	0.000890955
Os02g0736900	38.8354	-4.27391	1.02585	-4.16622	3.09689e-05	0.000893575
Os02g0503100	934.676	1.07748	0.258665	4.16554	3.10617e-05	0.000895245
Os09g0471100	163.003	-1.19214	0.286424	-4.16214	3.15274e-05	0.000906632
Os10g0368100	137.968	1.57722	0.379028	4.16122	3.16555e-05	0.000909299
Os01g0944700	1347	-1.55309	0.373609	-4.157	3.22455e-05	0.000924489
Os04g0127200	1068.21	-1.49128	0.359333	-4.15015	3.32263e-05	0.000950168
Os01g0651350	69.8997	1.97778	0.476855	4.14754	3.36061e-05	0.00095783
Os01g0864200	82.1784	-3.80198	0.918426	-4.13967	3.47801e-05	0.000990193
Os04g0462500	403.313	-1.02263	0.247073	-4.13898	3.48851e-05	0.000992081
Os02g0484200	126.097	4.20621	1.01764	4.13331	3.57571e-05	0.00101575
Os08g0375400	334.755	2.15698	0.521904	4.13291	3.58204e-05	0.00101643
Os08g0173300	28.3084	-6.15485	1.49113	-4.12764	3.66503e-05	0.00103768
Os04g0179200	63.2449	-8.32575	2.01894	-4.12383	3.7262e-05	0.00105384
Os03g0572250	168.146	1.18733	0.288169	4.12026	3.78441e-05	0.00106913
Os01g0137700	5.75205	-6.15929	1.49529	-4.11914	3.80295e-05	0.00107318
Os11g0417400	101.134	1.19142	0.289555	4.11465	3.87765e-05	0.00109306
Os06g0224200	148.805	-1.618	0.393566	-4.11113	3.93719e-05	0.00110863
Os10g0491400	67.4151	-4.45061	1.08274	-4.11052	3.94771e-05	0.00111038
Os04g0525200	114.771	-2.38811	0.58168	-4.10554	4.0338e-05	0.00113335
Os03g0232800	699.787	1.11054	0.270718	4.10221	4.09214e-05	0.00114386
Os11g0603000	6.04931	-6.34794	1.54806	-4.10056	4.12148e-05	0.00114918
Os01g0711000	120.265	1.20847	0.294902	4.09787	4.1697e-05	0.00115948
Os05g0143700	6.42348	-5.62834	1.37352	-4.09774	4.17195e-05	0.00115948
Os01g0957800	56.2398	2.47022	0.603092	4.09593	4.20476e-05	0.00116733
Os04g0659300	2837.1	-4.48816	1.09611	-4.09464	4.22826e-05	0.00117259
Os06g0223700	214.904	1.46407	0.357643	4.09367	4.24602e-05	0.00117624
Os01g0878000	342.369	1.13121	0.276373	4.09305	4.25738e-05	0.00117812
Os04g0179700	69.0294	-8.87589	2.16877	-4.0926	4.26569e-05	0.00117915
Os01g0949300	1050.57	-2.11448	0.517288	-4.08764	4.35793e-05	0.00120335
Os08g0138900	2894.91	1.48606	0.363756	4.08533	4.4014e-05	0.00121405
Os07g0586100	40.7245	2.98995	0.732133	4.08389	4.42881e-05	0.0012203
Os12g0130200	22.6212	-5.09969	1.24998	-4.0798	4.50747e-05	0.00123931
Os02g0139000	238.216	1.96944	0.482854	4.07875	4.52791e-05	0.0012436
Os01g0651400	68.7004	1.90287	0.467587	4.06955	4.7104e-05	0.00128959
Os07g0142802	50.5283	2.15739	0.530791	4.06449	4.81382e-05	0.00131649
Os01g0297200	23.6744	-4.4255	1.08914	-4.0633	4.83829e-05	0.00132178
Os03g0285800	315.678	-1.88435	0.46382	-4.06267	4.85148e-05	0.00132397
Os12g0608500	19.3173	3.59373	0.884746	4.06188	4.86796e-05	0.00132706
Os05g0500500	117.83	1.21766	0.299888	4.0604	4.89893e-05	0.00133268
Os11g0514500	46.0839	-4.47574	1.10332	-4.0566	4.97932e-05	0.00135168
Os03g0393700	181.506	-1.38534	0.341804	-4.05303	5.05585e-05	0.00137101
Os05g0394900	289.623	1.0246	0.252944	4.0507	5.10636e-05	0.00138033
Os10g0562900	52.4892	-3.42053	0.844487	-4.05042	5.11251e-05	0.00138054
Os12g0493900	21.6186	2.99269	0.73928	4.04812	5.16314e-05	0.00139275
Os06g0493100	219.494	-2.88325	0.712889	-4.04446	5.24429e-05	0.00141315
Os01g0933300	95.8271	-1.41588	0.350355	-4.04128	5.31592e-05	0.00143095
Os11g0214900	54.608	1.53619	0.380286	4.03957	5.35498e-05	0.00143845
Os07g0538350	88.9998	-2.97998	0.7381	-4.03737	5.40548e-05	0.0014505
Os11g0594000	24.1472	-5.42947	1.34518	-4.03624	5.43139e-05	0.00145593
Os08g0194350	37.5626	2.09763	0.520015	4.03378	5.4886e-05	0.00146973
Os03g0129100	442.123	-1.50744	0.373736	-4.03344	5.49655e-05	0.00147033
Os10g0136400	22.47	3.59026	0.890214	4.03303	5.50614e-05	0.00147136
Os09g0482900	106.13	1.81015	0.449154	4.03013	5.57471e-05	0.00148659
Os10g0173000	137.513	2.05272	0.509945	4.02538	5.68836e-05	0.00151362
Os11g0138400	24.7204	2.71873	0.675475	4.02491	5.69965e-05	0.00151362
Os05g0100600	542.202	-1.77816	0.441782	-4.02497	5.69831e-05	0.00151362
Os03g0346200	32.4733	-2.10819	0.523899	-4.02404	5.72073e-05	0.00151765
Os02g0712600	35.7585	-3.71961	0.92461	-4.02289	5.74879e-05	0.00152352
Os02g0690600	16.8983	3.61539	0.899048	4.02136	5.78636e-05	0.00153189
Os11g0474900	20.3221	-4.30336	1.07029	-4.02074	5.80148e-05	0.00153274
Os02g0557800	2751.95	1.15414	0.287034	4.02091	5.79744e-05	0.00153274
Os04g0675400	77.7198	3.58714	0.892432	4.01951	5.83201e-05	0.00153764
Os07g0631700	124.623	-2.97129	0.739296	-4.01907	5.84271e-05	0.00153888
Os01g0127900	75.2009	-1.67909	0.417973	-4.01722	5.88882e-05	0.00154944
Os03g0198600	76.9714	-2.2819	0.568322	-4.01516	5.94058e-05	0.00156146
Os03g0743500	226.197	-1.82569	0.454857	-4.01378	5.97546e-05	0.00156902
Os07g0129300	345.129	-5.90766	1.47336	-4.00965	6.08097e-05	0.00159509
Os11g0106700	3463.92	1.46982	0.366688	4.00837	6.11401e-05	0.00160212
Os02g0194600	13.9277	2.99449	0.747456	4.00624	6.16941e-05	0.00161335
Os10g0164001	31.4943	1.90642	0.476172	4.00363	6.23767e-05	0.00162788
Os01g0714600	72.2784	-2.60813	0.651538	-4.00303	6.25363e-05	0.00162902
Os02g0625300	1121.3	1.06148	0.265178	4.0029	6.25697e-05	0.00162902
Os04g0178300	246.11	-8.55233	2.1375	-4.00109	6.30516e-05	0.00163883
Os05g0439400	1519.78	-1.55704	0.389283	-3.99976	6.34056e-05	0.00164637
Os03g0830400	21.2483	-3.61979	0.905084	-3.99939	6.35048e-05	0.00164728
Os01g0947000	14.4155	-6.42798	1.60803	-3.99742	6.40369e-05	0.0016594
Os02g0122600	369.308	-2.36281	0.591236	-3.9964	6.43141e-05	0.00166491
Os07g0552800	52.9922	2.40636	0.602535	3.99372	6.50441e-05	0.00168211
Os05g0438800	601.145	1.22561	0.30703	3.99181	6.55697e-05	0.00169229
Os11g0582100	751.374	-1.38675	0.347481	-3.99086	6.58348e-05	0.00169743
Os05g0442700	11.8518	-4.1028	1.02884	-3.98779	6.66926e-05	0.00171782
Os02g0805100	24.7993	-2.55561	0.641383	-3.98453	6.76147e-05	0.00173983
Os02g0207100	39.6886	2.44131	0.613127	3.98173	6.84155e-05	0.00175691
Os12g0189300	29722.5	1.5101	0.37947	3.97949	6.9063e-05	0.00177177
Os06g0220100	68.7915	-1.15151	0.289516	-3.97736	6.96852e-05	0.00178258
Os03g0411800	534.057	-1.58727	0.399432	-3.97382	7.07299e-05	0.00180731
Os12g0120100	44.1863	-2.27167	0.571851	-3.97248	7.11286e-05	0.00181569
Os10g0542900	312.735	-2.63343	0.662981	-3.97211	7.1239e-05	0.0018167
Os05g0149400	173.456	-1.76339	0.444151	-3.97024	7.17992e-05	0.00182917
Os07g0691300	431.342	-1.54151	0.388367	-3.9692	7.21144e-05	0.00183469
Os09g0313550	23.9455	-1.97197	0.496835	-3.96905	7.21588e-05	0.00183469
Os04g0111100	32.0262	-2.60849	0.65743	-3.96771	7.25661e-05	0.00184322
Os04g0531750	939.776	1.18149	0.298043	3.96414	7.36607e-05	0.00186918
Os02g0527900	172.386	-1.28248	0.323743	-3.9614	7.45103e-05	0.00188887
Os04g0244800	2345.26	1.69736	0.428578	3.96045	7.48076e-05	0.00189453
Os02g0230200	80.6024	-1.51519	0.382934	-3.95679	7.59625e-05	0.00192189
Os01g0214600	1345.41	1.04574	0.264429	3.9547	7.66317e-05	0.0019331
Os11g0427700	3.1505	-15.858	4.00949	-3.95511	7.64989e-05	0.0019331
Os04g0527400	1143.14	1.06329	0.268856	3.95488	7.65746e-05	0.0019331
Os03g0342100	118.36	-1.36321	0.34473	-3.95444	7.67146e-05	0.0019333
Os07g0448100	17.4769	4.11766	1.04202	3.95163	7.76195e-05	0.00195227
Os12g0159000	358.871	-1.5329	0.388063	-3.95014	7.81058e-05	0.00196258
Os07g0100800	202.873	1.2988	0.328875	3.94922	7.84055e-05	0.00196819
Os11g0549469	9.33026	-4.8792	1.23603	-3.94748	7.89768e-05	0.00197866
Os04g0115700	1100.85	-2.21973	0.562313	-3.9475	7.89702e-05	0.00197866
Os12g0548800	205.838	-1.07501	0.272537	-3.94446	7.9979e-05	0.00200181
Os06g0234400	63.0415	2.11649	0.53738	3.93853	8.19821e-05	0.00204995
Os05g0256500	191.217	-1.16392	0.295598	-3.93749	8.23368e-05	0.00205682
Os02g0121500	1311.77	1.41638	0.360031	3.93406	8.35224e-05	0.00208441
Os06g0239100	50.1279	-2.54791	0.647901	-3.93255	8.40485e-05	0.00209347
Os08g0398300	55.1562	-3.07173	0.781466	-3.93073	8.46888e-05	0.00210737
Os12g0427600	12.3744	7.32065	1.86326	3.92895	8.53187e-05	0.00212099
Os06g0655100	1129.15	-1.0473	0.266699	-3.92688	8.60536e-05	0.00213513
Os10g0162838	4.44264	-6.13259	1.56201	-3.9261	8.63352e-05	0.00214005
Os02g0187700	310.785	-1.90811	0.486254	-3.92409	8.70591e-05	0.00215383
Os06g0202300	142.359	-1.81493	0.462604	-3.92329	8.73475e-05	0.00215474
Os09g0268800	8.69758	-5.57914	1.42195	-3.92359	8.7238e-05	0.00215474
Os02g0834800	17.5383	2.52202	0.643159	3.9213	8.80716e-05	0.00217052
Os01g0699100	76.418	-1.85201	0.472616	-3.91863	8.90519e-05	0.00219257
Os03g0153900	133.819	-2.46696	0.630053	-3.91548	9.02246e-05	0.00221932
Os02g0472700	37.6936	-1.81147	0.46315	-3.9112	9.18405e-05	0.00225475
Os02g0738200	29.7541	-4.15606	1.06347	-3.908	9.30636e-05	0.00228041
Os05g0454500	1450.86	-1.16709	0.299347	-3.89878	9.66786e-05	0.00236448
Os04g0569100	74.1369	1.8475	0.474089	3.89695	9.7413e-05	0.00238009
Os09g0255400	70.9433	-3.63762	0.934371	-3.89312	9.89649e-05	0.0024135
Os04g0432300	19.3991	3.4262	0.880877	3.88953	0.000100439	0.00244714
Os01g0223500	50.6828	-1.74182	0.447925	-3.88864	0.000100809	0.00245381
Os01g0681800	39.0439	-2.76751	0.712774	-3.88273	0.000103291	0.00251184
Os06g0690200	163.913	-1.39129	0.358527	-3.88058	0.000104207	0.00252724
Os04g0674700	58.2512	-1.90786	0.491753	-3.87971	0.000104581	0.00253124
Os08g0436700	16.3025	2.0713	0.53447	3.87543	0.000106436	0.00256998
Os11g0592100	89.3445	-3.09042	0.797632	-3.8745	0.000106845	0.00257632
Os11g0604900	39.697	-2.32061	0.599604	-3.87024	0.00010873	0.00261558
Os01g0625300	56.8367	1.54826	0.400141	3.8693	0.000109149	0.00262167
Os01g0695900	17.8778	5.29993	1.36994	3.86873	0.000109404	0.00262325
Os09g0471500	44.3224	-2.13975	0.553453	-3.86619	0.000110549	0.00264823
Os10g0568200	129.393	-1.76996	0.458543	-3.85997	0.000113402	0.00271404
Os01g0648000	29.8323	-1.94149	0.503701	-3.85446	0.000115988	0.00277075
Os01g0888800	40.982	-2.41613	0.627196	-3.85228	0.000117024	0.00279291
Os10g0558750	22.3724	-2.44828	0.635663	-3.85154	0.000117379	0.00279879
Os03g0342900	7982.2	-1.04566	0.271618	-3.84976	0.000118233	0.00281653
Os07g0543100	288.922	2.05508	0.534056	3.84805	0.000119062	0.00283364
Os07g0570100	460.538	-1.19527	0.31065	-3.84763	0.000119266	0.00283588
Os03g0305400	181.91	-1.69461	0.440866	-3.84382	0.000121132	0.00287757
Os01g0952100	137.645	1.19085	0.310094	3.84028	0.000122895	0.00291138
Os09g0431100	47.0734	-2.95063	0.769239	-3.83578	0.000125167	0.00295431
Os10g0209700	1242.29	1.25887	0.328745	3.82931	0.000128501	0.00302202
Os03g0654700	20.2746	4.95172	1.29311	3.8293	0.000128506	0.00302202
Os06g0713800	162.914	-1.1918	0.311497	-3.82603	0.000130225	0.00305963
Os03g0679800	104.518	1.7685	0.46244	3.82429	0.000131151	0.00307858
Os01g0747800	757.151	-1.40515	0.367782	-3.82061	0.000133122	0.00312091
Os04g0142400	325.992	-1.71975	0.450193	-3.82002	0.000133441	0.00312091
Os09g0538000	3140.6	2.65999	0.696272	3.82034	0.00013327	0.00312091
Os08g0435800	153.223	-1.19344	0.312579	-3.81805	0.000134509	0.00314304
Os07g0569800	17.9697	-3.72594	0.976717	-3.81476	0.000136315	0.00317945
Os06g0180666	453.256	1.1108	0.291406	3.81187	0.000137917	0.00321389
Os02g0106700	130.218	-1.17595	0.308565	-3.81102	0.000138396	0.00322212
Os09g0272200	86.8147	2.06768	0.542705	3.80996	0.000138988	0.00323299
Os01g0224700	23.2203	-3.90328	1.02476	-3.80896	0.000139551	0.00324315
Os09g0538600	145.994	-1.14861	0.301659	-3.80766	0.000140288	0.00325438
Os04g0319700	24.5478	3.48329	0.915383	3.80528	0.000141643	0.00328284
Os12g0503000	1084.34	-1.24152	0.326321	-3.80459	0.000142042	0.00328912
Os03g0805400	360.828	-1.10338	0.290041	-3.80423	0.000142245	0.00329085
Os10g0543400	9.0337	-5.68728	1.49631	-3.80087	0.000144187	0.00333279
Os09g0545300	94.9153	-2.74298	0.72225	-3.79784	0.000145965	0.00337086
Os06g0493600	119.652	-1.66615	0.438943	-3.79582	0.000147158	0.00338926
Os07g0416700	74.0326	-1.27347	0.335474	-3.79602	0.000147036	0.00338926
Os03g0270000	487.685	-1.65947	0.43724	-3.79533	0.000147446	0.00339284
Os11g0678000	218.935	-1.57221	0.414279	-3.79506	0.00014761	0.00339359
Os12g0210500	107.83	-2.85881	0.753455	-3.79427	0.000148079	0.00340132
Os07g0273600	67.3262	-1.24634	0.328624	-3.79259	0.000149085	0.00341732
Os08g0508500	82.7292	2.05938	0.543023	3.79244	0.000149175	0.00341732
Os12g0570400	29.6188	-3.1294	0.82523	-3.79216	0.000149343	0.00341813
Os01g0575200	162.626	-1.99115	0.525869	-3.78639	0.000152851	0.00349217
Os12g0550800	109.908	-2.56225	0.678116	-3.77848	0.000157787	0.00359855
Os06g0301400	86.708	1.30919	0.346637	3.77682	0.000158844	0.00361944
Os10g0540200	110.471	-1.29758	0.343742	-3.77485	0.000160105	0.00363851
Os08g0442400	71.5857	-1.79693	0.476027	-3.77485	0.000160106	0.00363851
Os03g0326200	43.7539	-3.25268	0.86179	-3.77432	0.000160442	0.00364293
Os03g0764100	570.844	-1.25159	0.331882	-3.77117	0.000162483	0.00367952
Os12g0634700	81.016	1.67555	0.444609	3.76861	0.000164162	0.00371425
Os01g0213400	140.741	-2.54841	0.676322	-3.76804	0.000164535	0.00371941
Os06g0172800	239.295	-1.29374	0.34351	-3.76623	0.000165731	0.00373986
Os10g0530500	3203.18	1.09287	0.290211	3.76577	0.000166034	0.00374341
Os07g0490100	238.62	1.3494	0.358473	3.76429	0.000167025	0.00376245
Os01g0227400	65.8413	1.68072	0.446606	3.76331	0.000167679	0.00377387
Os08g0202200	29.9534	-2.48731	0.661076	-3.76252	0.000168207	0.00378244
Os08g0414700	179.015	-1.57601	0.419048	-3.76092	0.000169291	0.0038035
Os11g0120300	46.6051	-1.95534	0.52042	-3.75723	0.000171805	0.0038566
Os11g0207400	69.3512	-1.73334	0.461487	-3.75598	0.000172664	0.00386913
Os08g0127100	1001.6	-1.78795	0.476613	-3.75137	0.00017587	0.00393754
Os10g0572300	584.24	-1.06989	0.285244	-3.7508	0.000176273	0.00394059
Os05g0444200	28.9484	-2.84892	0.759563	-3.75074	0.000176314	0.00394059
Os06g0653000	92.6569	-1.95554	0.52147	-3.75004	0.000176803	0.0039481
Os01g0130900	332.269	-1.59125	0.424727	-3.74654	0.000179294	0.00400023
Os06g0671600	30.6811	-4.21349	1.1252	-3.74464	0.000180653	0.00402706
Os03g0126700	595.821	1.4273	0.381432	3.74195	0.000182597	0.00406686
Os04g0683700	22009.5	-1.17733	0.314664	-3.74154	0.000182896	0.00406999
Os10g0344000	86.9827	2.59316	0.693376	3.7399	0.000184093	0.00409308
Os09g0294000	10813	1.26209	0.338141	3.73243	0.000189643	0.00420556
Os06g0640100	127.82	1.53487	0.411343	3.73136	0.000190446	0.00421971
Os01g0796400	713.316	-1.35148	0.362337	-3.72988	0.00019157	0.00424096
Os04g0662400	22.7553	-3.93689	1.05664	-3.72586	0.000194648	0.00430168
Os03g0340500	188.372	-1.25193	0.336063	-3.72527	0.000195104	0.00430807
Os05g0510400	314.997	-1.07694	0.289316	-3.72235	0.000197375	0.00435446
Os11g0168600	28.1771	-2.90674	0.781032	-3.72167	0.000197909	0.0043625
Os02g0221100	25.7707	-1.97702	0.531307	-3.72104	0.0001984	0.00436957
Os10g0531400	47.0736	-1.7145	0.461163	-3.71778	0.000200978	0.00441877
Os11g0210201	74.2528	-2.02796	0.545537	-3.71737	0.000201306	0.00442218
Os01g0604500	170.913	-1.30932	0.352516	-3.71422	0.000203833	0.00446624
Os03g0787000	242.721	-1.55608	0.418938	-3.71433	0.000203744	0.00446624
Os06g0349800	189.777	-1.42773	0.384532	-3.71291	0.000204891	0.0044856
Os12g0158700	120.301	-1.66244	0.448092	-3.71004	0.000207226	0.00452544
Os02g0717600	179.798	-1.32994	0.35868	-3.70787	0.00020901	0.00455635
Os01g0153800	16.3211	-2.69016	0.72566	-3.70719	0.000209569	0.00456466
Os05g0375466	16.3195	-3.67295	0.991399	-3.70481	0.000211546	0.00459992
Os09g0314200	100.39	-1.88018	0.508229	-3.69947	0.00021605	0.00469388
Os11g0118400	66.6201	-2.2962	0.620815	-3.69868	0.000216719	0.00470444
Os01g0597800	83.7206	-2.03177	0.549698	-3.69617	0.00021888	0.00474332
Os02g0632900	50.8845	-1.87763	0.508138	-3.69513	0.000219778	0.00475189
Os04g0458600	29.1871	-2.49861	0.676141	-3.69539	0.000219546	0.00475189
Os04g0530000	55.973	-1.22688	0.332196	-3.69325	0.000221403	0.00477868
Os09g0309700	273.586	1.22182	0.330829	3.69321	0.000221442	0.00477868
Os09g0344800	1333.73	1.22118	0.331198	3.68716	0.000226775	0.00488555
Os01g0934100	802.755	-1.22814	0.333268	-3.68515	0.000228572	0.00490779
Os10g0529500	78.3845	3.32149	0.901305	3.6852	0.000228523	0.00490779
Os07g0664400	93.1072	1.90428	0.516721	3.68532	0.000228418	0.00490779
Os08g0156000	66.2833	2.1597	0.586184	3.68434	0.000229295	0.0049151
Os11g0639300	614.373	-1.16444	0.316251	-3.68201	0.000231403	0.00495615
Os01g0846400	51.1919	3.23825	0.880125	3.67931	0.000233863	0.00500467
Os06g0483200	511.1	1.36122	0.369993	3.67904	0.000234111	0.0050058
Os05g0522600	1047.44	-1.47625	0.401334	-3.67835	0.000234752	0.00501533
Os05g0507300	1238.07	-1.08584	0.295352	-3.67643	0.000236516	0.00504463
Os03g0196600	327.992	1.31375	0.357689	3.67287	0.00023984	0.00511128
Os06g0728700	1979.14	1.08316	0.295333	3.66759	0.000244851	0.00521374
Os07g0245200	263.351	-1.14918	0.313466	-3.66606	0.000246321	0.00524069
Os10g0492900	1236.3	1.43723	0.392069	3.66577	0.000246599	0.00524227
Os11g0173500	641.759	-1.46083	0.399131	-3.66003	0.000252184	0.0053433
Os06g0229066	11.3476	6.71465	1.83496	3.65929	0.000252919	0.00535445
Os11g0267000	4136.77	1.24462	0.340155	3.65897	0.000253226	0.00535655
Os08g0137800	19.1018	-4.5609	1.24868	-3.65256	0.000259638	0.00547864
Os01g0136100	13.6328	2.57944	0.706324	3.65192	0.00026029	0.00548661
Os05g0549900	51.2969	-1.71177	0.468751	-3.65177	0.000260443	0.00548661
Os07g0611400	26.5538	-5.797	1.58927	-3.6476	0.000264705	0.00557182
Os12g0178633	5.05256	6.70077	1.83795	3.64579	0.00026657	0.00560189
Os02g0534400	146.503	1.49332	0.409693	3.64497	0.000267424	0.00561066
Os02g0791300	73.9278	-2.11508	0.58052	-3.64342	0.000269043	0.00563776
Os01g0719100	1280.04	-1.14867	0.31543	-3.64158	0.000270966	0.00566646
Os12g0170800	40.1289	-3.37782	0.927717	-3.641	0.000271584	0.00567475
Os01g0259933	98.3215	-1.51241	0.415725	-3.638	0.00027476	0.00572665
Os05g0155200	110.767	1.16575	0.320449	3.63787	0.000274903	0.00572665
Os08g0161500	140.095	1.17341	0.322576	3.63761	0.000275183	0.00572665
Os09g0472900	106.019	-2.85931	0.785979	-3.63789	0.000274878	0.00572665
Os06g0184866	469.124	-1.10654	0.304249	-3.63695	0.000275885	0.00573198
Os08g0562300	13.6129	-5.49946	1.51204	-3.63712	0.0002757	0.00573198
Os10g0509600	14.0639	4.61136	1.27108	3.62791	0.000285726	0.00592208
Os01g0227350	283.81	1.35023	0.372527	3.62451	0.000289509	0.00597745
Os01g0822800	277.438	1.7466	0.481921	3.62426	0.000289795	0.00597745
Os02g0651900	213.062	1.55287	0.428456	3.62434	0.000289704	0.00597745
Os09g0342000	33.4601	-2.12714	0.586887	-3.62445	0.00028958	0.00597745
Os11g0184800	182.994	2.30305	0.636199	3.62002	0.000294578	0.00606637
Os07g0539700	398.669	-1.50387	0.415463	-3.61975	0.000294889	0.00606791
Os07g0678300	1020.88	1.24319	0.343511	3.61908	0.000295654	0.00607878
Os06g0500700	31.5523	1.74506	0.482288	3.61829	0.000296554	0.00609241
Os03g0723400	87.3052	7.59172	2.09886	3.61707	0.00029796	0.00611639
Os02g0228300	1013.47	-1.32503	0.366516	-3.6152	0.00030012	0.00614111
Os01g0940000	259.047	1.94688	0.539109	3.6113	0.000304668	0.00622425
Os04g0439300	126.407	1.13431	0.314586	3.60572	0.000311288	0.00633931
Os01g0194600	216.236	1.62314	0.450242	3.60503	0.000312114	0.00634607
Os07g0532500	194.519	1.08355	0.3006	3.60462	0.000312604	0.00635101
Os04g0634700	105.42	-1.48873	0.4131	-3.6038	0.000313595	0.0063661
Os02g0176000	676.846	-2.09253	0.580788	-3.60291	0.000314673	0.00638293
Os04g0562100	177.56	1.33219	0.369829	3.60219	0.000315548	0.00639564
Os04g0540200	253.343	-1.16721	0.324204	-3.60024	0.00031793	0.00643882
Os08g0143300	11.5685	-5.53324	1.53773	-3.59831	0.000320294	0.0064765
Os11g0118500	125.574	-2.02654	0.563361	-3.59724	0.000321616	0.00649299
Os01g0186600	25.1559	-5.98205	1.6631	-3.59693	0.000322001	0.00649566
Os02g0704000	1871.28	1.6232	0.451551	3.59471	0.000324755	0.00654608
Os02g0609900	11.2193	-6.34845	1.76732	-3.59212	0.000327994	0.00660619
Os04g0586500	144.351	-2.56526	0.714316	-3.59121	0.000329145	0.00662417
Os07g0575900	353.552	-1.35064	0.37629	-3.58935	0.000331505	0.00666643
Os03g0431200	1384.24	1.23739	0.345126	3.58534	0.00033664	0.0067644
Os05g0432200	45.148	2.62452	0.73209	3.58497	0.000337122	0.00676543
Os07g0503900	63.4467	-2.10081	0.586018	-3.58489	0.000337218	0.00676543
Os05g0457200	33.6401	1.96724	0.54909	3.58273	0.000340026	0.00681114
Os03g0801900	205.338	-1.18675	0.331432	-3.58068	0.000342695	0.00685924
Os10g0578200	30.7932	-1.96321	0.548487	-3.57932	0.000344484	0.00688969
Os11g0173366	149.199	-3.34434	0.934522	-3.57866	0.000345357	0.0068964
Os04g0491200	67.5891	-1.52668	0.426685	-3.57802	0.000346212	0.00690811
Os03g0363100	16.3218	-5.40291	1.51191	-3.57357	0.000352153	0.00700487
Os08g0457300	9.05114	-5.4087	1.51346	-3.57372	0.000351945	0.00700487
Os01g0584900	109.268	-2.60424	0.72884	-3.57314	0.000352728	0.00701088
Os07g0225300	225.157	-1.37827	0.385918	-3.57142	0.000355054	0.00705166
Os10g0178500	192.272	-1.85241	0.518935	-3.56964	0.000357475	0.00709424
Os06g0683100	59.1781	2.44155	0.684135	3.56882	0.000358597	0.00711102
Os01g0594800	23.5092	-3.77749	1.05873	-3.56794	0.000359802	0.00712942
Os12g0637800	10.6032	-2.94436	0.825776	-3.56557	0.000363068	0.00718857
Os06g0724700	32.6906	-1.36724	0.383604	-3.56419	0.000364984	0.00721538
Os07g0158500	44.6842	1.99256	0.559034	3.56429	0.00036484	0.00721538
Os09g0532400	5243.24	1.20293	0.337732	3.56178	0.000368348	0.0072763
Os05g0336000	83.727	-1.45392	0.408495	-3.55921	0.000371973	0.00733098
Os04g0509400	147.773	-1.5936	0.448091	-3.55642	0.000375936	0.00739774
Os12g0108500	65.4818	-1.25837	0.353943	-3.55528	0.000377575	0.0074243
Os09g0498700	147.748	-1.04801	0.295127	-3.55104	0.00038371	0.00753915
Os04g0518800	63.2053	1.34041	0.377563	3.55017	0.000384986	0.00755844
Os12g0555000	575.825	-4.27943	1.20623	-3.54776	0.000388517	0.00761612
Os09g0333500	35.2161	1.53611	0.43303	3.54736	0.000389115	0.00762202
Os02g0564700	28.7404	1.99111	0.56153	3.54587	0.000391322	0.00765941
Os09g0520500	30.5693	2.02059	0.569922	3.54537	0.000392055	0.00766792
Os08g0203350	9.35439	-5.38497	1.51954	-3.54382	0.00039438	0.00770165
Os08g0103000	975.126	-1.0092	0.284851	-3.54288	0.000395781	0.00772314
Os10g0326800	6.04568	-5.74005	1.62078	-3.54153	0.000397807	0.00775679
Os03g0361600	6.51141	-7.24859	2.04712	-3.54087	0.000398808	0.00777039
Os03g0269500	18.3622	2.05434	0.580862	3.53671	0.00040514	0.00788181
Os01g0305900	281.687	1.02762	0.290772	3.5341	0.000409159	0.00794242
Os01g0945300	52.4851	1.4369	0.406736	3.53277	0.000411235	0.00795819
Os03g0277600	11.4463	-4.47254	1.26596	-3.53292	0.00041099	0.00795819
Os03g0604566	274.914	1.82508	0.516564	3.53312	0.000410691	0.00795819
Os06g0179200	177.507	1.23342	0.349358	3.53055	0.000414699	0.00801918
Os02g0327500	150.571	-1.76894	0.501432	-3.52778	0.000419059	0.00809739
Os06g0129900	2076.51	1.28145	0.363315	3.52711	0.00042012	0.00811179
Os02g0149900	23.2316	2.49092	0.706748	3.52448	0.000424308	0.00816079
Os05g0395116	41.4328	1.76115	0.499713	3.52433	0.000424555	0.00816079
Os03g0423300	98.78	1.91318	0.542963	3.5236	0.000425722	0.0081708
Os10g0416800	631.617	-1.59369	0.452576	-3.52137	0.000429324	0.00823378
Os08g0416000	3484.51	-1.10544	0.314087	-3.51952	0.00043232	0.00828507
Os01g0627500	79.0093	1.77832	0.505541	3.51765	0.000435385	0.00833757
Os04g0598900	16.8685	3.76833	1.07145	3.51703	0.000436405	0.00834466
Os10g0379854	94.8001	-1.54879	0.44072	-3.51423	0.000441034	0.0084269
Os01g0733001	94.4978	-1.83869	0.523329	-3.51346	0.000442318	0.00843888
Os04g0496700	138.909	-1.02638	0.292122	-3.51353	0.000442197	0.00843888
Os03g0657400	28.5965	-1.92482	0.54808	-3.51193	0.000444858	0.00847475
Os01g0734466	131.021	1.0505	0.299384	3.50886	0.000450034	0.00856064
Os08g0158400	10.5948	4.46067	1.27186	3.5072	0.00045285	0.00860147
Os07g0541200	63.838	1.92589	0.549202	3.5067	0.000453701	0.0086096
Os08g0391000	14.194	-5.82753	1.66199	-3.50636	0.000454284	0.0086096
Os02g0251900	21.4348	-5.17986	1.47758	-3.50565	0.000455501	0.00861836
Os01g0351800	98.4183	-1.13919	0.325079	-3.50435	0.000457718	0.00864279
Os01g0852100	185.916	-1.40639	0.401441	-3.50336	0.00045942	0.0086622
Os01g0149800	3304.74	1.56256	0.446129	3.50247	0.000460957	0.00867843
Os07g0575500	42.0387	1.3149	0.376231	3.49493	0.000474182	0.00890781
Os07g0147500	8785.94	-1.49026	0.426547	-3.49377	0.000476247	0.00894007
Os01g0893400	292.998	1.06351	0.304474	3.49293	0.000477745	0.00896164
Os11g0644800	1149.07	1.37655	0.394241	3.49165	0.000480051	0.00899832
Os02g0681700	213.442	-1.50531	0.431463	-3.48884	0.000485113	0.00907945
Os02g0759400	972.884	-2.70997	0.776792	-3.48866	0.000485439	0.00907945
Os03g0388432	78.1077	-1.57632	0.452033	-3.48719	0.000488127	0.00911643
Os08g0112300	139.057	-3.0215	0.866631	-3.48649	0.000489396	0.00912023
Os01g0681600	518.115	-1.18533	0.340627	-3.47986	0.000501677	0.00931531
Os02g0689200	394.635	-1.02436	0.294355	-3.48003	0.000501352	0.00931531
Os03g0701100	29.2246	1.97358	0.567114	3.48003	0.00050135	0.00931531
Os07g0537900	104.834	-2.56484	0.736975	-3.48022	0.000501001	0.00931531
Os03g0804500	261.512	-1.58695	0.456105	-3.47935	0.000502635	0.00932635
Os07g0522500	602.241	-1.66545	0.478831	-3.47816	0.000504869	0.00936103
Os01g0646000	37.3604	1.79483	0.516378	3.47581	0.000509318	0.00942991
Os01g0613500	107.246	-2.79901	0.805795	-3.47359	0.000513536	0.00947937
Os01g0695700	386.722	1.26971	0.3656	3.47295	0.000514763	0.00947937
Os11g0229400	258.59	-1.53859	0.442968	-3.47337	0.000513958	0.00947937
Os03g0129800	328.245	-1.0582	0.304704	-3.47286	0.000514942	0.00947937
Os07g0538300	83.4669	-2.85824	0.822817	-3.47372	0.000513295	0.00947937
Os05g0184901	32.8829	2.82514	0.813567	3.47254	0.00051556	0.00948394
Os01g0606900	83.7428	2.06126	0.593947	3.47044	0.000519602	0.00954463
Os05g0496100	61.0141	1.39927	0.40339	3.46879	0.000522814	0.00958991
Os01g0201200	775.09	1.16263	0.335323	3.4672	0.000525912	0.00963984
Os06g0655500	2932.63	-1.20623	0.347982	-3.46636	0.000527549	0.00966296
Os02g0197200	592.659	1.55302	0.448305	3.4642	0.000531812	0.00973409
Os07g0130100	33.8248	-2.13838	0.617348	-3.46381	0.000532579	0.00974119
Os01g0570601	5.63037	-4.81475	1.39076	-3.46195	0.000536274	0.00980179
Os04g0450400	211.593	-1.67533	0.483976	-3.46161	0.000536958	0.00980732
Os08g0189300	89.6898	1.17783	0.34044	3.45973	0.00054071	0.00986182
Os03g0826800	255.533	-2.35508	0.680795	-3.45931	0.000541553	0.00987018
Os06g0698785	251.703	-1.2548	0.362819	-3.45847	0.000543258	0.00989423
Os02g0826300	55.702	-1.4353	0.415175	-3.45709	0.000546038	0.00993782
Os10g0456000	23.7044	-1.8486	0.535439	-3.45249	0.000555447	0.0100876
Os01g0946700	16.4454	-4.70704	1.36404	-3.4508	0.00055893	0.0101437
Os01g0606000	75.3781	1.50049	0.434891	3.45027	0.00056003	0.0101565
Os10g0506100	166.961	1.32016	0.382801	3.44867	0.000563359	0.0102024
Os05g0427400	383.791	-1.61564	0.469153	-3.44373	0.000573747	0.0103686
Os11g0598500	83.9821	-2.91888	0.847734	-3.44315	0.00057497	0.0103834
Os02g0671100	238.896	-1.46071	0.424883	-3.43791	0.000586219	0.0105643
Os03g0164300	263.5	-1.09538	0.318776	-3.4362	0.000589941	0.0106239
Os04g0417600	90.07	-1.48348	0.432014	-3.43388	0.000595016	0.0107043
Os01g0855600	11.7666	-3.1049	0.904788	-3.43163	0.000599955	0.010774
Os03g0233900	21.4128	2.60211	0.75848	3.43069	0.000602057	0.0107971
Os07g0597200	342.328	-1.54798	0.451222	-3.43064	0.000602152	0.0107971
Os11g0118300	211.49	-1.60707	0.468898	-3.42733	0.000609554	0.0109159
Os07g0659300	110.595	1.98104	0.578245	3.42595	0.000612653	0.0109637
Os09g0400500	97.616	-1.96328	0.573118	-3.42562	0.000613405	0.0109647
Os05g0475300	983.464	-1.14666	0.334777	-3.42516	0.000614435	0.0109727
Os06g0689600	99.5009	-1.32149	0.386176	-3.42198	0.000621679	0.0110943
Os06g0673700	108.025	-1.73342	0.506788	-3.4204	0.000625283	0.0111431
Os11g0569800	275.922	-1.24377	0.363753	-3.41928	0.000627861	0.0111813
Os05g0489200	1343.28	1.09776	0.321086	3.41889	0.000628766	0.0111897
Os03g0160000	90.4578	-1.091	0.319151	-3.41845	0.000629797	0.0112003
Os02g0503900	209.034	1.83801	0.537813	3.41757	0.000631839	0.011221
Os11g0490300	119.037	1.32356	0.387368	3.4168	0.000633615	0.0112448
Os12g0511900	35.6865	-1.48863	0.435797	-3.41587	0.000635792	0.0112756
Os01g0388000	237.961	-1.19641	0.350354	-3.41487	0.000638128	0.0113093
Os01g0915000	381.756	-1.32498	0.388345	-3.41186	0.000645214	0.011427
Os02g0174900	15.669	2.00664	0.588364	3.41053	0.000648361	0.0114669
Os02g0537000	211.839	1.8995	0.557361	3.40802	0.000654361	0.011565
Os10g0580400	764.026	-1.46238	0.429375	-3.40584	0.000659597	0.0116415
Os11g0660000	512.722	1.26803	0.372538	3.40375	0.00066468	0.0117151
Os11g0109500	20.3972	-2.42996	0.714108	-3.4028	0.000666995	0.0117398
Os07g0620600	6.93745	5.00808	1.47173	3.40286	0.000666853	0.0117398
Os01g0727500	71.0499	-3.22066	0.946551	-3.40252	0.000667667	0.0117436
Os02g0730000	111.983	-2.00419	0.589137	-3.40191	0.000669155	0.0117617
Os01g0661750	7.63492	17.7781	5.22765	3.40078	0.000671935	0.0117784
Os01g0770100	570.318	1.15654	0.340107	3.40053	0.000672551	0.0117784
Os05g0541000	25.7426	2.27407	0.668767	3.40039	0.000672891	0.0117784
Os04g0635500	199.729	-1.84494	0.542716	-3.39945	0.00067521	0.0118035
Os10g0518300	453.776	-1.01159	0.2977	-3.39803	0.00067874	0.0118491
Os04g0645500	26.1851	-1.8671	0.549459	-3.39806	0.000678644	0.0118491
Os02g0504000	1755.15	1.12401	0.330821	3.39763	0.000679718	0.0118581
Os10g0122600	48.437	1.67796	0.494122	3.39585	0.000684155	0.0119193
Os05g0464400	10.4817	-4.15118	1.22283	-3.39474	0.00068693	0.0119587
Os05g0568800	2071.32	1.27789	0.377086	3.38886	0.00070185	0.012178
Os12g0222300	172.946	-3.28561	0.969878	-3.38765	0.000704941	0.0122234
Os07g0122200	144.503	-1.59734	0.471912	-3.38482	0.000712258	0.012342
Os01g0175700	16.6863	2.76812	0.818008	3.38398	0.000714437	0.0123714
Os04g0556400	111.27	-2.9044	0.85845	-3.3833	0.000716195	0.0123925
Os03g0788500	69.9339	-1.04497	0.308898	-3.38289	0.000717272	0.0123954
Os07g0111700	329.884	1.02083	0.301986	3.38039	0.000723825	0.0124918
Os09g0549450	329.919	1.11627	0.330284	3.37972	0.000725605	0.0125141
Os06g0278000	39.4224	1.47074	0.435401	3.37791	0.000730395	0.0125883
Os04g0487400	21.8036	-4.11643	1.21968	-3.37501	0.000738127	0.0127045
Os03g0841600	89.9388	1.84941	0.548146	3.37393	0.000741023	0.0127373
Os11g0457300	143.344	1.34866	0.399849	3.37292	0.000743753	0.0127756
Os03g0855700	368.99	1.35283	0.401194	3.372	0.00074625	0.01281
Os11g0207300	25.1978	-1.70336	0.505434	-3.3701	0.000751407	0.0128727
Os04g0226340	388.453	-1.63879	0.486383	-3.36933	0.000753505	0.0128936
Os09g0343400	52.6101	-1.84651	0.548043	-3.36929	0.000753632	0.0128936
Os04g0634800	151.129	-2.18502	0.648786	-3.36786	0.000757541	0.0129518
Os08g0118000	314.929	-1.38086	0.410606	-3.36298	0.000771068	0.0131307
Os05g0579800	76.0284	1.01797	0.302959	3.3601	0.000779137	0.0132505
Os04g0625200	174.636	1.16018	0.345434	3.3586	0.000783373	0.0133137
Os05g0361700	54.7449	-2.52136	0.750861	-3.35795	0.000785214	0.0133362
Os03g0661600	120.742	-2.77859	0.828479	-3.35385	0.000796968	0.0135179
Os02g0208675	10.7618	-4.2041	1.25395	-3.35268	0.000800339	0.01355
Os03g0322200	69.0057	-2.61953	0.782449	-3.34786	0.000814382	0.0137407
Os04g0634400	6.09543	3.69519	1.10437	3.34597	0.000819943	0.0138164
Os07g0540600	12.4657	-4.36686	1.30551	-3.34494	0.000822994	0.0138587
Os03g0610800	196.658	1.0398	0.311016	3.34324	0.000828057	0.0139348
Os02g0570500	11.4978	2.65663	0.794916	3.34203	0.000831677	0.0139865
Os08g0478700	3080.13	-1.13562	0.339994	-3.34011	0.000837438	0.0140742
Os03g0139500	7.12124	5.37056	1.60919	3.33743	0.000845573	0.0141553
Os03g0764900	17.6406	2.35593	0.705863	3.33766	0.000844883	0.0141553
Os11g0259700	5.2337	-6.09517	1.82985	-3.33097	0.00086544	0.0144785
Os05g0145100	5.55621	-5.58544	1.67723	-3.33015	0.000867983	0.0145022
Os07g0656600	101.433	1.71933	0.516275	3.33026	0.000867652	0.0145022
Os03g0580200	84.3843	1.66588	0.500624	3.3276	0.00087597	0.0146166
Os03g0803100	27.3113	-3.45803	1.03918	-3.32765	0.000875808	0.0146166
Os06g0158000	49.3862	-1.4466	0.434808	-3.327	0.000877873	0.0146388
Os07g0686800	14.4984	-4.1854	1.25812	-3.32672	0.000878759	0.0146441
Os04g0405300	248.981	-2.10155	0.632264	-3.32385	0.000887843	0.0147763
Os11g0686500	283.866	-1.10326	0.332046	-3.32261	0.0008918	0.0148229
Os04g0474700	92.5596	1.18777	0.357587	3.32163	0.00089494	0.0148655
Os09g0322500	172.563	-1.99969	0.602465	-3.31919	0.000902788	0.0149824
Os05g0582400	49.8608	1.6323	0.492134	3.31678	0.000910605	0.0150867
Os01g0645900	339.623	1.14611	0.345719	3.31515	0.000915935	0.0151554
Os04g0517100	211.735	-1.61025	0.485775	-3.31481	0.000917059	0.0151642
Os03g0782200	3104.65	1.39294	0.420782	3.31037	0.000931729	0.0153969
Os05g0107900	39.8553	1.28411	0.387945	3.31004	0.000932813	0.0154049
Os11g0635500	879.003	1.50509	0.454831	3.30913	0.000935868	0.0154454
Os10g0208500	788.23	-1.28312	0.387787	-3.30881	0.000936918	0.0154528
Os02g0684400	1393.48	-1.55456	0.469992	-3.30763	0.000940901	0.0155086
Os08g0334300	5.85155	-6.16518	1.86466	-3.30632	0.00094529	0.0155709
Os05g0542732	202.324	-1.48068	0.447919	-3.30569	0.000947442	0.0155864
Os01g0201100	128.609	-1.36053	0.411866	-3.30334	0.000955404	0.0157073
Os08g0504700	1935.86	-1.1498	0.348724	-3.29717	0.000976634	0.0160255
Os01g0570800	1339.4	-1.23662	0.375666	-3.2918	0.000995475	0.0163034
Os04g0682100	207.736	-1.2623	0.383522	-3.29134	0.000997109	0.0163198
Os12g0534100	285.094	1.22016	0.37099	3.28893	0.00100567	0.0164495
Os02g0571300	36.1647	2.20963	0.672064	3.28783	0.00100964	0.0165038
Os08g0526200	44.458	-1.51807	0.46196	-3.28615	0.00101566	0.0165917
Os01g0179800	2226.26	1.14041	0.347351	3.28316	0.0010265	0.0167305
Os03g0289800	28.5731	-2.45555	0.747952	-3.28303	0.00102697	0.0167305
Os05g0537100	169.578	-1.83323	0.558417	-3.28291	0.00102741	0.0167305
Os02g0527500	2.76287	-5.17883	1.5776	-3.28272	0.0010281	0.016731
Os06g0726300	123.858	-1.86545	0.568336	-3.2823	0.00102965	0.0167365
Os04g0565200	27.4585	2.24863	0.685272	3.28138	0.00103301	0.0167791
Os01g0959750	286.702	1.621	0.494446	3.27842	0.00104392	0.0169348
Os08g0297800	12.318	3.07806	0.939044	3.27787	0.00104594	0.0169463
Os09g0369400	1163.88	-1.22809	0.375122	-3.27385	0.00106092	0.0171673
Os04g0648200	6.67315	-5.76597	1.76148	-3.27336	0.00106278	0.0171756
Os03g0283000	5.24797	4.50045	1.37516	3.27269	0.00106531	0.0172057
Os01g0567400	146.266	-1.26679	0.387243	-3.2713	0.00107054	0.0172685
Os04g0223500	179.067	2.03048	0.620818	3.27066	0.00107297	0.0172968
Os03g0138000	271.31	-1.21055	0.370343	-3.26873	0.00108031	0.0174043
Os11g0104300	1250.42	1.23974	0.379518	3.26662	0.0010884	0.0175126
Os01g0934400	277.889	1.04119	0.31887	3.26525	0.00109367	0.0175864
Os01g0561600	7.77831	-5.68665	1.74232	-3.26383	0.00109918	0.0176375
Os05g0473500	1104	-1.36411	0.418556	-3.25908	0.00111774	0.0178727
Os12g0629700	34.6679	-3.28407	1.00791	-3.2583	0.00112081	0.0178995
Os01g0737500	12.814	-3.91709	1.20323	-3.25547	0.00113205	0.0180565
Os02g0261400	19.4275	-2.72675	0.837716	-3.25499	0.00113397	0.018076
Os06g0721800	19.5727	-2.86496	0.880768	-3.2528	0.00114275	0.0181821
Os12g0617250	25.5793	4.45941	1.3711	3.25242	0.00114427	0.0181949
Os08g0260800	4.3312	-5.57461	1.71488	-3.25073	0.00115107	0.0182466
Os09g0355400	1314.77	-1.06792	0.328511	-3.25078	0.0011509	0.0182466
Os06g0666100	14.9965	-3.1256	0.96157	-3.25052	0.00115193	0.018249
Os10g0465700	482.766	1.24032	0.381629	3.25008	0.00115371	0.0182659
Os10g0555100	279.848	-1.78497	0.549301	-3.24954	0.00115593	0.0182898
Os10g0469600	193.633	-1.15147	0.354397	-3.24908	0.00115778	0.0182965
Os03g0207400	329.739	-1.15531	0.355563	-3.24925	0.00115711	0.0182965
Os12g0115300	4184.53	1.18491	0.365059	3.24579	0.00117126	0.0184641
Os02g0599400	57.7607	1.1533	0.355483	3.24432	0.0011773	0.0185366
Os05g0217800	2715.86	1.23183	0.379716	3.24409	0.00117827	0.0185405
Os07g0440900	10.4245	-2.73843	0.846248	-3.23597	0.00121232	0.0190473
Os06g0238200	110.585	-1.70134	0.526297	-3.23267	0.00122639	0.0192504
Os06g0547400	309.138	-1.91423	0.592247	-3.23215	0.00122862	0.0192717
Os04g0653700	10.1642	-5.32561	1.64834	-3.23089	0.00123407	0.0193355
Os02g0743200	233.184	-1.52696	0.472831	-3.22939	0.00124053	0.0194248
Os01g0196300	28.6115	-3.51035	1.08773	-3.22724	0.0012499	0.0195477
Os07g0570500	772.889	-1.19636	0.371022	-3.2245	0.00126191	0.0197116
Os04g0462600	59.011	1.29721	0.402434	3.22342	0.00126669	0.0197742
Os07g0553700	601.569	-1.57159	0.487615	-3.223	0.00126854	0.019791
Os02g0813600	151.282	-1.5509	0.481279	-3.22245	0.00127098	0.0198092
Os08g0529100	113.951	1.56413	0.485708	3.22032	0.00128049	0.019929
Os08g0455900	32.6235	2.33988	0.726709	3.21983	0.00128267	0.0199509
Os10g0191300	10.4897	-5.20913	1.61793	-3.21963	0.00128358	0.019953
Os12g0438300	161.471	1.25372	0.389641	3.21764	0.00129251	0.0200796
Os05g0537400	406.079	1.24416	0.386695	3.21742	0.00129349	0.0200828
Os03g0773300	199.512	-2.21279	0.687948	-3.2165	0.00129764	0.0201349
Os08g0148267	145.204	1.07874	0.335654	3.21384	0.00130972	0.0202979
Os12g0486900	46.378	-1.80957	0.563125	-3.21344	0.00131154	0.0203055
Os02g0175950	68.6771	-1.71142	0.532606	-3.2133	0.00131219	0.0203055
Os04g0320700	7978.59	-1.2017	0.374004	-3.21306	0.00131329	0.0203055
Os02g0167600	377.451	1.3624	0.424141	3.21214	0.00131749	0.0203446
Os02g0156600	24.2653	-1.54367	0.481054	-3.20893	0.0013323	0.0205487
Os06g0304600	862.903	1.09265	0.340755	3.20657	0.00134327	0.0207055
Os06g0142300	13.9453	-4.01681	1.25332	-3.20494	0.00135089	0.0207854
Os08g0542000	142.947	-1.51193	0.471714	-3.20518	0.0013498	0.0207854
Os04g0385600	100.295	-1.54347	0.481689	-3.20428	0.00135398	0.0208081
Os03g0371300	156.064	2.45138	0.765128	3.20388	0.00135591	0.0208154
Os01g0298400	9.21489	-4.79052	1.49537	-3.20358	0.00135733	0.0208221
Os06g0294000	337.583	1.32597	0.413947	3.20324	0.00135891	0.0208339
Os07g0471300	75.8541	-1.66312	0.519241	-3.20298	0.00136013	0.0208402
Os02g0699000	21.8336	-2.28883	0.71485	-3.20183	0.00136558	0.0208987
Os09g0426500	242.653	1.24403	0.388562	3.20164	0.00136649	0.0209002
Os03g0816500	328.409	1.07892	0.33705	3.20108	0.00136915	0.0209104
Os02g0596300	60.8092	1.75108	0.547553	3.19801	0.00138381	0.0210647
Os04g0578000	77.0792	-3.28214	1.02716	-3.19537	0.00139653	0.0212082
Os05g0183100	451.411	-1.17381	0.367433	-3.19462	0.00140016	0.0212381
Os08g0137900	5.78478	-5.42805	1.69937	-3.19415	0.00140244	0.0212476
Os09g0561500	14.3422	-2.15494	0.674652	-3.19415	0.00140242	0.0212476
Os02g0453000	144.581	-1.02671	0.321583	-3.19268	0.0014096	0.0213309
Os11g0587600	442.451	-1.48485	0.465153	-3.19218	0.00141205	0.0213428
Os06g0621800	21.1902	-1.47774	0.462914	-3.19226	0.00141166	0.0213428
Os03g0574900	500.154	1.3681	0.428864	3.19006	0.00142244	0.0214745
Os09g0471200	7.77046	-4.73469	1.4855	-3.18728	0.00143617	0.0216564
Os10g0504650	12.2944	-4.23995	1.33067	-3.18632	0.00144095	0.0217157
Os07g0462800	23.8283	3.20242	1.00602	3.18326	0.00145626	0.0219207
Os08g0207500	78.2521	1.68167	0.528624	3.18121	0.0014666	0.0220505
Os02g0569900	83.8643	-3.06973	0.965514	-3.17937	0.00147595	0.0221651
Os01g0332200	7.29774	3.46223	1.08921	3.17865	0.00147961	0.0222071
Os06g0715300	5.59196	5.47485	1.72257	3.17831	0.00148138	0.0222078
Os07g0164900	270.456	1.13352	0.35664	3.17833	0.00148124	0.0222078
Os01g0956200	14.6504	-2.26199	0.711967	-3.1771	0.00148755	0.0222743
Os01g0690800	130.489	-1.44459	0.454777	-3.17648	0.00149076	0.0223092
Os01g0253500	54.0342	-1.53679	0.484148	-3.17422	0.00150239	0.0224702
Os08g0106000	25.8297	1.47566	0.465037	3.1732	0.00150766	0.0225359
Os04g0657300	457.206	1.00684	0.317381	3.17234	0.00151214	0.0225898
Os05g0393100	313.947	-1.01512	0.320101	-3.17127	0.00151775	0.0226603
Os01g0302000	229.786	1.36056	0.429812	3.16547	0.00154834	0.0230634
Os04g0598800	84.3289	-1.41539	0.447254	-3.16461	0.00155288	0.0231177
Os08g0236800	122.498	1.06426	0.337288	3.15535	0.00160304	0.0237268
Os02g0582600	108.952	-1.67749	0.531896	-3.15379	0.00161163	0.0238295
Os03g0618900	17.6002	1.84251	0.584804	3.15064	0.00162914	0.0240436
Os06g0202900	240.204	-1.15937	0.367999	-3.15047	0.00163006	0.0240436
Os08g0434100	239.483	1.34428	0.426688	3.15049	0.00162996	0.0240436
Os12g0139400	1056.26	1.30134	0.414175	3.14201	0.00167794	0.0246649
Os11g0251400	7154.25	-1.11725	0.355677	-3.14119	0.0016826	0.0247193
Os07g0568100	154.879	-1.16491	0.371197	-3.13826	0.00169953	0.0249394
Os01g0209200	42.2945	-1.40056	0.446399	-3.13746	0.00170418	0.0249933
Os08g0356800	138.189	-1.42407	0.454244	-3.13502	0.0017184	0.0251444
Os03g0323600	1198.37	-1.6575	0.528794	-3.13449	0.00172152	0.0251757
Os02g0205500	20.4659	-3.73991	1.19347	-3.13363	0.00172658	0.0252354
Os12g0637000	10.1287	-4.22084	1.34942	-3.12789	0.00176066	0.0256604
Os02g0227100	55.3578	-1.61974	0.518245	-3.12542	0.00177551	0.0258475
Os08g0240000	278.87	1.01132	0.323695	3.12431	0.00178222	0.0259306
Os03g0775650	36.2916	1.81698	0.581696	3.1236	0.00178653	0.0259648
Os04g0496150	45.8945	-1.28046	0.409952	-3.12345	0.00178747	0.0259648
Os08g0462900	73.8679	1.17479	0.376122	3.12342	0.0017876	0.0259648
Os02g0148000	2377.46	1.02814	0.329274	3.12244	0.00179361	0.0260372
Os01g0566100	439.106	-1.0895	0.349149	-3.12043	0.00180588	0.0261858
Os05g0560900	10.3673	-4.10415	1.31586	-3.11898	0.0018148	0.0262992
Os12g0283100	24.3986	-2.5882	0.83023	-3.11745	0.0018242	0.026377
Os05g0130100	252.135	-1.49042	0.478178	-3.11687	0.00182782	0.0264144
Os11g0245800	168.683	-1.06548	0.342011	-3.11534	0.00183732	0.0265062
Os06g0323100	287.769	-2.21503	0.711042	-3.11518	0.0018383	0.0265062
Os10g0528300	281.839	1.76311	0.566271	3.11355	0.00184853	0.0266139
Os05g0140334	69.2526	1.28483	0.412728	3.11302	0.00185184	0.0266267
Os05g0449100	75.1281	-1.25825	0.40428	-3.11233	0.0018562	0.0266744
Os06g0725000	310.97	-1.32796	0.428076	-3.10216	0.00192117	0.0275618
Os06g0613600	8.73578	-5.36689	1.73143	-3.09969	0.00193722	0.0277456
Os12g0188566	70.8332	1.26625	0.408594	3.09904	0.00194149	0.0277645
Os09g0535900	2019.63	1.11894	0.361064	3.09899	0.00194179	0.0277645
Os01g0865700	12.7978	-2.96789	0.957875	-3.09841	0.00194564	0.0277886
Os04g0338950	11.9847	-5.50925	1.77805	-3.09848	0.00194515	0.0277886
Os01g0624700	25.7415	-1.80678	0.583249	-3.09778	0.00194974	0.0278318
Os02g0472566	30.846	-1.76489	0.570272	-3.09482	0.0019693	0.0280641
Os12g0148700	5.83958	-4.44822	1.43764	-3.09412	0.00197399	0.0280843
Os03g0851700	479.304	1.00472	0.324707	3.09423	0.00197326	0.0280843
Os12g0131400	17.4335	-2.30797	0.746722	-3.0908	0.00199617	0.0283683
Os01g0623500	130.42	-1.38082	0.446997	-3.08911	0.00200756	0.0284358
Os09g0129500	73.6567	-1.95791	0.635158	-3.08256	0.00205226	0.028989
Os10g0471000	25.7301	1.51458	0.491372	3.08234	0.00205377	0.0289944
Os08g0269600	244.019	1.13371	0.36791	3.08148	0.00205977	0.0290463
Os10g0341101	18.9409	-1.69034	0.548616	-3.0811	0.00206235	0.0290516
Os02g0226200	67.4945	1.96846	0.639178	3.07967	0.00207228	0.0291756
Os10g0430200	1153.64	1.0549	0.34264	3.07876	0.00207866	0.0292493
Os07g0589600	51.183	1.45003	0.471546	3.07506	0.00210463	0.02955
Os07g0251900	8.75941	-5.11856	1.66491	-3.07437	0.00210949	0.029602
Os11g0180800	39.3203	1.67365	0.544475	3.07388	0.00211292	0.029634
Os01g0174100	146.189	-1.01292	0.329692	-3.07233	0.00212398	0.0297728
Os08g0395700	363.578	-2.01692	0.656972	-3.07003	0.00214036	0.0299371
Os07g0491900	836.529	1.0624	0.346111	3.06953	0.00214397	0.0299549
Os10g0196000	358.211	1.04011	0.338901	3.06907	0.00214723	0.0299841
Os06g0254600	174.314	1.52938	0.498914	3.06542	0.00217367	0.030304
Os03g0794200	204.083	-1.08329	0.353669	-3.06301	0.00219123	0.0304826
Os01g0179600	7334.88	1.24466	0.406619	3.061	0.00220596	0.0306377
Os04g0578300	20.9055	2.08829	0.682389	3.06026	0.00221143	0.0306805
Os01g0215500	126.909	2.36361	0.77272	3.05882	0.00222209	0.0307951
Os05g0550700	38.0341	-2.16926	0.709378	-3.05797	0.00222841	0.0308493
Os02g0806300	8.87758	-3.12604	1.0224	-3.05754	0.00223163	0.0308773
Os06g0651000	957.43	-1.29829	0.424804	-3.05622	0.0022415	0.0309471
Os07g0489200	159.697	1.01982	0.333967	3.05366	0.00226072	0.0311957
Os06g0232600	32.3261	1.8204	0.59689	3.04982	0.00228981	0.0315802
Os01g0933200	353.461	1.11821	0.366981	3.04706	0.0023109	0.0318539
Os07g0513200	39.1114	1.42166	0.466831	3.04534	0.00232421	0.0319657
Os04g0556100	9.03534	-2.61253	0.858111	-3.04452	0.00233052	0.0320114
Os01g0935000	28.267	2.91179	0.956482	3.04427	0.00233243	0.0320133
Os06g0562300	45.1676	-1.53673	0.50517	-3.042	0.00235015	0.0322393
Os06g0215950	120.959	-1.20087	0.395038	-3.03988	0.00236672	0.0323732
Os09g0250700	1914.98	1.13535	0.373496	3.03978	0.00236748	0.0323732
Os06g0167500	616.529	-1.15211	0.379143	-3.03871	0.0023759	0.0324711
Os05g0322900	599.23	-1.2258	0.403616	-3.03706	0.002389	0.0326154
Os03g0218500	148.27	1.30045	0.428379	3.03575	0.00239939	0.0327205
Os07g0162100	389.956	1.12603	0.370942	3.03561	0.00240052	0.0327205
Os11g0226966	113.427	-2.44999	0.807283	-3.03486	0.00240647	0.0327842
Os10g0389300	120.83	2.13522	0.703702	3.03428	0.00241113	0.0328183
Os02g0823900	228.714	-1.25007	0.411991	-3.03423	0.00241153	0.0328183
Os03g0826900	43.6024	-4.49779	1.48277	-3.03338	0.00241831	0.0328807
Os06g0253100	114.272	1.09659	0.361762	3.03124	0.0024355	0.0330622
Os11g0108932	77.2351	-1.48098	0.489125	-3.02783	0.0024632	0.03338
Os02g0126400	1113.3	-1.69374	0.559828	-3.02546	0.00248256	0.0335899
Os01g0178500	1115.48	-1.05613	0.34933	-3.0233	0.00250032	0.0337583
Os04g0649600	349.68	-2.08616	0.690015	-3.02336	0.00249988	0.0337583
Os11g0684000	225.994	-1.48405	0.490897	-3.02314	0.00250168	0.0337589
Os03g0400700	90.4902	-1.30249	0.431022	-3.02185	0.00251233	0.0338671
Os07g0619500	100.272	-1.60742	0.532213	-3.02026	0.0025256	0.034028
Os11g0450050	211.508	1.0879	0.360265	3.01971	0.00253015	0.0340535
Os03g0648500	9.96499	3.00524	0.99543	3.01904	0.00253581	0.0341118
Os05g0579700	12.6629	4.04724	1.34133	3.01734	0.00255008	0.0342315
Os01g0921100	51.3825	1.24655	0.413381	3.0155	0.00256554	0.0343858
Os06g0697200	79.2978	2.17908	0.723158	3.01328	0.00258438	0.034604
Os06g0714400	12.7287	-2.23715	0.742463	-3.01315	0.00258549	0.034604
Os12g0102700	5.54814	3.39378	1.12651	3.01265	0.00258978	0.0346383
Os05g0560200	65.6853	2.40881	0.800376	3.0096	0.0026159	0.0349695
Os10g0368200	28.8346	1.96622	0.653995	3.00647	0.00264296	0.0352446
Os07g0691200	7714.4	1.02204	0.339916	3.00673	0.00264076	0.0352446
Os06g0674000	41.0568	-2.25802	0.751121	-3.0062	0.00264537	0.0352533
Os03g0151500	15.7181	3.40904	1.13502	3.00351	0.00266886	0.0355294
Os11g0707100	25.3079	-1.46711	0.488746	-3.00179	0.00268396	0.035675
Os11g0181800	250.563	1.04142	0.346995	3.00124	0.00268883	0.0357027
Os07g0241700	30.9015	1.22799	0.409281	3.00036	0.00269657	0.0357686
Os01g0824800	79.4188	-2.17969	0.726805	-2.999	0.00270866	0.0359104
Os01g0388101	27.6897	-1.30977	0.436817	-2.99843	0.00271376	0.0359409
Os04g0509600	463.732	-1.42925	0.476651	-2.99852	0.00271298	0.0359409
Os11g0123250	5.42271	4.5003	1.5033	2.99362	0.00275692	0.0364373
Os02g0681632	156.788	-1.34519	0.449488	-2.99273	0.00276495	0.0365246
Os02g0303000	7.68876	-5.61389	1.87856	-2.9884	0.0028044	0.0370077
Os07g0129200	232.562	-3.90545	1.30785	-2.98616	0.00282502	0.0372416
Os06g0473800	13.3773	4.16972	1.39653	2.98576	0.00282871	0.037271
Os01g0145200	28.0345	-1.5541	0.521309	-2.98114	0.00287173	0.0377797
Os01g0627400	39.4799	1.43061	0.479966	2.98065	0.00287639	0.0378122
Os05g0361500	17.177	-2.08332	0.698968	-2.98057	0.00287715	0.0378122
Os03g0843000	12.0264	-1.8845	0.632855	-2.97778	0.00290349	0.0381389
Os05g0576600	172.89	-1.73534	0.582817	-2.9775	0.00290608	0.0381535
Os12g0580600	76.1837	-1.67965	0.564775	-2.97401	0.00293935	0.0385114
Os12g0566000	153.997	1.23797	0.416875	2.96965	0.00298143	0.0389833
Os08g0477500	56.0637	1.00176	0.337384	2.96921	0.0029857	0.0390193
Os01g0187200	8.84076	-4.71591	1.58943	-2.96704	0.00300678	0.0392348
Os08g0331000	36.1203	-2.91403	0.98208	-2.9672	0.00300527	0.0392348
Os01g0899700	10.8459	1.70167	0.57397	2.96474	0.00302941	0.0394299
Os03g0356526	22.8307	-3.03553	1.02406	-2.9642	0.00303469	0.0394786
Os03g0718800	133.737	1.46922	0.495799	2.96334	0.00304316	0.03952
Os04g0254300	32.0432	-1.46467	0.494279	-2.96326	0.00304402	0.03952
Os06g0218300	143.344	-1.15839	0.391055	-2.96223	0.00305418	0.0395918
Os04g0603900	28.435	1.67014	0.56399	2.9613	0.00306345	0.0396519
Os12g0123300	25.1313	-1.77078	0.598024	-2.96106	0.00306587	0.0396632
Os09g0541100	15.9303	-3.12651	1.05615	-2.96029	0.00307346	0.0397414
Os07g0536300	36.6547	-3.10002	1.04739	-2.95974	0.00307897	0.0397927
Os01g0547600	78.5408	1.67977	0.567902	2.95786	0.00309784	0.0400163
Os03g0593600	24.3642	3.56555	1.20628	2.95582	0.0031184	0.0402414
Os04g0622501	25.7587	-2.28737	0.773995	-2.95528	0.00312384	0.0402914
Os01g0947833	27.5043	-1.86726	0.631938	-2.95482	0.00312856	0.0403118
Os03g0267000	31.4818	2.31898	0.78541	2.95257	0.00315139	0.0405653
Os12g0260500	11.7377	-4.24566	1.43898	-2.95047	0.00317294	0.0407813
Os03g0768900	19.2742	-3.38275	1.14659	-2.95026	0.00317508	0.0407884
Os01g0556700	72.7199	1.34375	0.455584	2.94952	0.00318272	0.0408661
Os12g0510500	56.4606	-1.28141	0.434496	-2.94919	0.00318606	0.0408886
Os02g0612200	22.9505	-1.92098	0.651462	-2.94872	0.00319097	0.0409107
Os02g0758800	70.1249	1.55613	0.527731	2.94872	0.00319092	0.0409107
Os02g0248200	18.9882	-2.41468	0.819233	-2.94748	0.00320372	0.0410435
Os05g0135400	11.4534	-2.92287	0.991863	-2.94685	0.00321032	0.0410973
Os08g0484100	84.6225	-1.10424	0.374852	-2.94581	0.00322111	0.0412149
Os02g0154000	19.3194	-1.85525	0.629974	-2.94495	0.00323003	0.0413084
Os04g0655400	19.9678	-2.95944	1.00553	-2.94317	0.00324866	0.0415259
Os09g0498200	15.9646	-1.91351	0.650316	-2.94244	0.00325642	0.0416044
Os06g0119900	65.1635	1.17275	0.398847	2.94036	0.00327827	0.0417797
Os01g0678000	22.1121	-3.11478	1.05996	-2.93859	0.00329714	0.0419784
Os06g0295900	297.673	-1.06885	0.364305	-2.93394	0.00334689	0.0425275
Os03g0238300	439.68	-1.26915	0.432662	-2.93334	0.00335334	0.0425885
Os07g0526600	9.13762	-5.24721	1.7906	-2.93041	0.00338513	0.0428649
Os01g0301900	77.3477	1.22792	0.419363	2.92807	0.00341074	0.0431467
Os12g0230133	42.4651	1.79618	0.61375	2.92656	0.00342733	0.0432925
Os03g0114100	56.5791	-1.36701	0.467289	-2.9254	0.00344009	0.0434324
Os12g0130300	16.473	-3.05307	1.0438	-2.92496	0.003445	0.0434569
Os09g0479500	15.4568	-1.61527	0.55228	-2.92473	0.00344756	0.0434626
Os03g0776900	133.844	1.07436	0.367526	2.92323	0.00346423	0.0436143
Os03g0836300	272.321	-1.43319	0.490305	-2.92306	0.00346615	0.0436143
Os06g0354700	1741.35	-1.04663	0.358241	-2.92157	0.0034827	0.0437552
Os04g0359100	187.488	1.18462	0.405522	2.92122	0.00348658	0.0437826
Os02g0731500	122.911	-1.45182	0.49721	-2.91993	0.00350113	0.0439437
Os09g0518000	875.737	1.24883	0.428023	2.91768	0.00352646	0.0442185
Os04g0121100	36.1397	2.58273	0.885956	2.91519	0.00355477	0.04453
Os03g0165266	71.6648	-1.37326	0.471338	-2.91354	0.00357358	0.044722
Os07g0688200	14.3284	-2.14013	0.734968	-2.91187	0.0035927	0.0449394
Os02g0165100	146.426	-2.41978	0.831476	-2.91023	0.00361163	0.0451468
Os01g0347100	105.56	-1.11098	0.381949	-2.90872	0.00362912	0.0452847
Os01g0128100	42.4996	1.13242	0.389633	2.90636	0.00365655	0.0455605
Os01g0955100	73.2149	-1.60968	0.553877	-2.9062	0.00365846	0.0455622
Os02g0617700	79.0326	1.02227	0.351813	2.90571	0.00366423	0.0455899
Os10g0389500	12.9116	4.39908	1.51429	2.90504	0.00367201	0.0456519
Os10g0498000	32.0445	2.10568	0.724851	2.90498	0.00367277	0.0456519
Os06g0605900	1621.06	-1.44805	0.498731	-2.90346	0.00369059	0.0458289
Os01g0340801	3.87042	-5.85037	2.01571	-2.90239	0.00370332	0.0459427
Os02g0245800	59.3872	1.28568	0.443164	2.90114	0.00371805	0.0460587
Os06g0695800	90.9891	-1.21625	0.419306	-2.90063	0.00372416	0.0460899
Os08g0543000	2.42881	5.34384	1.84423	2.89761	0.00376024	0.0465139
Os12g0226900	64.115	1.55601	0.537065	2.89725	0.00376449	0.0465442
Os06g0531751	212.995	1.26706	0.437514	2.89604	0.00377908	0.0466347
Os12g0432600	14.936	-3.40773	1.17691	-2.8955	0.00378561	0.0466928
Os12g0144200	51.654	1.37629	0.475614	2.89371	0.00380714	0.0469359
Os07g0664600	170.55	-1.79099	0.619235	-2.89226	0.00382483	0.0471313
Os09g0482860	107.865	1.12157	0.387882	2.89152	0.00383386	0.0472108
Os01g0128200	167.119	1.2035	0.416879	2.88692	0.00389037	0.0477785
Os08g0387700	77.1244	-1.09344	0.378874	-2.88601	0.00390161	0.0478936
Os12g0211900	10.3477	-4.8344	1.67535	-2.8856	0.00390669	0.0479101
Os06g0688200	11.5915	-2.08918	0.724468	-2.88374	0.00392987	0.0481713
Os06g0535400	1093.56	-1.0863	0.377647	-2.8765	0.00402118	0.0491031
Os01g0757900	62.4888	-1.28016	0.445475	-2.8737	0.00405694	0.0494732
Os04g0514600	105.703	-2.51178	0.874067	-2.87367	0.00405734	0.0494732
Os07g0593400	36.3751	1.13207	0.393967	2.87352	0.00405919	0.0494732
Os01g0613800	52.1502	-2.12875	0.74104	-2.87265	0.00407043	0.0495866
Os01g0551100	652.376	-1.0033	0.349291	-2.8724	0.00407371	0.0496031
Os10g0406900	357.255	1.55038	0.53979	2.87219	0.00407639	0.0496122
Os08g0507100	18.1864	-5.71416	1.99052	-2.87069	0.00409583	0.0498251
Os11g0483950	24.5289	-1.64888	0.574484	-2.87019	0.00410224	0.0498559
Os02g0644000	300.436	-1.06679	0.371803	-2.86923	0.00411468	0.049935
Os09g0434900	36.2133	-2.05989	0.71796	-2.86909	0.00411653	0.049935
