# Supplementary material for: Transcriptome-derived networks reconstruct distinct immune strategies under different iron availability between Arabidopsis and rice
Source: Research Square preprint supplement (doi:10.21203/rs.3.rs-3214423/v1), 2024-07-15
Supplement: Supplementary file 13 [file cdbbae96198f1fd0c8c2c37a.xlsx]

## Sheet: Ath1
GO biological process complete	Ref list	Input genes	Expected	FE	P	adjusted P
defense response to fungus (GO:0050832)	702	115	40.56	2.84	7.87e-21	1.93e-18
cellular response to hypoxia (GO:0071456)	239	62	13.81	4.49	8.52e-20	1.93e-17
response to chitin (GO:0010200)	308	53	17.8	2.98	5.64e-11	5.53e-09
response to salicylic acid (GO:0009751)	440	60	25.42	2.36	1.23e-08	1.08e-06
toxin metabolic process (GO:0009404)	118	23	6.82	3.37	2.43e-06	0.000186
innate immune response (GO:0045087)	178	29	10.29	2.82	3.15e-06	0.000238
response to molecule of bacterial origin (GO:0002237)	117	22	6.76	3.25	6.62e-06	0.000464
response to oomycetes (GO:0002239)	105	20	6.07	3.3	1.45e-05	0.000949
cellular response to heat (GO:0034605)	71	16	4.1	3.9	1.74e-05	0.0011
response to blue light (GO:0009637)	160	25	9.25	2.7	2.74e-05	0.00166
protein refolding (GO:0042026)	35	11	2.02	5.44	2.83e-05	0.0017
response to light intensity (GO:0009642)	373	44	21.55	2.04	2.98e-05	0.00177
response to red light (GO:0010114)	103	19	5.95	3.19	3.47e-05	0.00204
negative regulation of defense response (GO:0031348)	76	16	4.39	3.64	3.57e-05	0.00208
auxin biosynthetic process (GO:0009851)	32	10	1.85	5.41	6.78e-05	0.00366
cellular response to organic cyclic compound (GO:0071407)	259	33	14.97	2.21	7.74e-05	0.00414
defense response to insect (GO:0002213)	33	10	1.91	5.24	8.41e-05	0.00442
regulation of immune system process (GO:0002682)	179	25	10.34	2.42	0.000148	0.00724
response to virus (GO:0009615)	89	16	5.14	3.11	0.000182	0.00857
response to nutrient levels (GO:0031667)	272	33	15.72	2.1	0.000189	0.0087
tryptophan biosynthetic process (GO:0000162)	23	8	1.33	6.02	0.000199	0.00906
rRNA metabolic process (GO:0016072)	288	34	16.64	2.04	0.000275	0.0121
exonucleolytic catabolism of deadenylated mRNA (GO:0043928)	18	7	1.04	6.73	0.000288	0.0124
negative regulation of response to external stimulus (GO:0032102)	49	11	2.83	3.89	0.00036	0.015
negative regulation of response to biotic stimulus (GO:0002832)	49	11	2.83	3.89	0.00036	0.0151
indole glucosinolate metabolic process (GO:0042343)	19	7	1.1	6.38	0.000376	0.0155
systemic acquired resistance (GO:0009627)	116	18	6.7	2.69	0.000374	0.0155
cellular response to ethylene stimulus (GO:0071369)	96	16	5.55	2.88	0.000386	0.0157
chaperone-mediated protein complex assembly (GO:0051131)	13	6	0.75	7.99	0.000385	0.0158
secondary metabolite biosynthetic process (GO:0044550)	180	24	10.4	2.31	0.000473	0.0189
regulation of protein serine/threonine phosphatase activity (GO:0080163)	20	7	1.16	6.06	0.000484	0.0191
heat acclimation (GO:0010286)	70	13	4.04	3.21	0.000544	0.0204
tropism (GO:0009606)	155	21	8.96	2.34	0.000698	0.0244
cellular response to unfolded protein (GO:0034620)	45	10	2.6	3.85	0.000707	0.0246
regulation of auxin metabolic process (GO:0090354)	22	7	1.27	5.51	0.000772	0.0264
defense response by callose deposition in cell wall (GO:0052544)	16	6	0.92	6.49	0.00092	0.0306
chaperone cofactor-dependent protein refolding (GO:0051085)	48	10	2.77	3.61	0.00109	0.0353
import into nucleus (GO:0051170)	58	11	3.35	3.28	0.00122	0.0379
lignin metabolic process (GO:0009808)	58	11	3.35	3.28	0.00122	0.0381
auxin transport (GO:0060918)	98	15	5.66	2.65	0.00126	0.0385
cell death (GO:0008219)	128	18	7.4	2.43	0.00131	0.0399
cellular aldehyde metabolic process (GO:0006081)	50	10	2.89	3.46	0.00142	0.0421
response to ozone (GO:0010193)	33	8	1.91	4.2	0.00148	0.0435
nitrate transmembrane transport (GO:0015706)	26	7	1.5	4.66	0.00175	0.0494
oligopeptide transport (GO:0006857)	26	7	1.5	4.66	0.00175	0.0499

## Sheet: Ath2
GO biological process complete	Ref list	Input genes	Expected	FE	P	adjusted P
chlorophyll biosynthetic process (GO:0015995)	62	20	3.54	5.65	9.82e-09	1.03e-06
response to salt stress (GO:0009651)	622	75	35.51	2.11	1.33e-08	1.35e-06
cold acclimation (GO:0009631)	62	19	3.54	5.37	4.52e-08	4.16e-06
starch catabolic process (GO:0005983)	17	11	0.97	11.33	1.01e-07	8.98e-06
circadian rhythm (GO:0007623)	127	25	7.25	3.45	6.26e-07	4.98e-05
response to desiccation (GO:0009269)	25	11	1.43	7.71	1.89e-06	0.000139
response to salicylic acid (GO:0009751)	440	51	25.12	2.03	1.1e-05	0.000694
response to zinc ion (GO:0010043)	46	13	2.63	4.95	1.24e-05	0.000771
metal ion transport (GO:0030001)	209	30	11.93	2.51	1.75e-05	0.00105
fatty acid derivative metabolic process (GO:1901568)	45	12	2.57	4.67	4.33e-05	0.0025
terpenoid metabolic process (GO:0006721)	217	30	12.39	2.42	4.58e-05	0.00262
protoporphyrinogen IX biosynthetic process (GO:0006782)	15	7	0.86	8.17	0.00011	0.00558
flavonoid biosynthetic process (GO:0009813)	86	16	4.91	3.26	0.000113	0.00562
starch biosynthetic process (GO:0019252)	36	10	2.06	4.87	0.00014	0.00666
organic hydroxy compound biosynthetic process (GO:1901617)	213	28	12.16	2.3	0.00014	0.00669
suberin biosynthetic process (GO:0010345)	22	8	1.26	6.37	0.000143	0.00673
plant-type cell wall biogenesis (GO:0009832)	270	32	15.41	2.08	0.000277	0.0123
ion transmembrane transport (GO:0034220)	296	34	16.9	2.01	0.000317	0.0137
regulation of salicylic acid mediated signaling pathway (GO:2000031)	33	9	1.88	4.78	0.000337	0.0144
monosaccharide metabolic process (GO:0005996)	127	19	7.25	2.62	0.00034	0.0144
response to mannitol (GO:0010555)	19	7	1.08	6.45	0.000351	0.0147
chloroplast organization (GO:0009658)	263	31	15.01	2.06	0.00038	0.0159
lateral root morphogenesis (GO:0010102)	78	14	4.45	3.14	0.000408	0.0168
monocarboxylic acid biosynthetic process (GO:0072330)	252	30	14.39	2.09	0.000454	0.018
fat-soluble vitamin biosynthetic process (GO:0042362)	20	7	1.14	6.13	0.000452	0.0182
malate transport (GO:0015743)	20	7	1.14	6.13	0.000452	0.0183
regulation of defense response to oomycetes (GO:1902288)	14	6	0.8	7.51	0.000494	0.0194
glycogen metabolic process (GO:0005977)	15	6	0.86	7.01	0.000661	0.0249
abscisic acid-activated signaling pathway (GO:0009738)	157	21	8.96	2.34	0.0007	0.0261
peptidyl-threonine dephosphorylation (GO:0035970)	46	10	2.63	3.81	0.00075	0.0276
response to nematode (GO:0009624)	84	14	4.8	2.92	0.000782	0.0284
glyceraldehyde-3-phosphate metabolic process (GO:0019682)	10	5	0.57	8.76	0.000869	0.0308
alcohol metabolic process (GO:0006066)	138	19	7.88	2.41	0.001	0.0352
cell wall polysaccharide biosynthetic process (GO:0070592)	98	15	5.59	2.68	0.00112	0.0384
quinone biosynthetic process (GO:1901663)	40	9	2.28	3.94	0.00111	0.0385
ammonia assimilation cycle (GO:0019676)	6	4	0.34	11.68	0.00137	0.0443
photosystem I assembly (GO:0048564)	18	6	1.03	5.84	0.00143	0.0456

## Sheet: Ath3
GO biological process complete	Ref list	Input genes	Expected	FE	P	adjusted P
defense response to fungus (GO:0050832)	702	27	6.55	4.12	1.12e-09	5.09e-07
response to salicylic acid (GO:0009751)	440	19	4.11	4.63	6.59e-08	2.28e-05
response to molecule of bacterial origin (GO:0002237)	117	10	1.09	9.16	3.11e-07	8.31e-05
response to chitin (GO:0010200)	308	15	2.87	5.22	3.9e-07	9.58e-05
regulation of immune system process (GO:0002682)	179	11	1.67	6.58	1.73e-06	0.000391
regulation of defense response (GO:0031347)	744	22	6.94	3.17	3.03e-06	0.000637
response to iron ion (GO:0010039)	25	5	0.23	21.43	7.67e-06	0.00141
systemic acquired resistance (GO:0009627)	116	8	1.08	7.39	2.09e-05	0.00333
intracellular sequestering of iron ion (GO:0006880)	15	4	0.14	28.57	2.48e-05	0.00384
response to oxidative stress (GO:0006979)	613	17	5.72	2.97	8.88e-05	0.0119
response to salt stress (GO:0009651)	622	17	5.81	2.93	0.000105	0.0132
organic hydroxy compound metabolic process (GO:1901615)	389	13	3.63	3.58	0.000105	0.0134
immune system process (GO:0002376)	456	14	4.26	3.29	0.000136	0.0163
phyllome development (GO:0048827)	714	18	6.66	2.7	0.000176	0.0203
monocarboxylic acid metabolic process (GO:0032787)	655	17	6.11	2.78	0.000191	0.0212
export from cell (GO:0140352)	167	8	1.56	5.13	0.000236	0.0243
programmed cell death (GO:0012501)	89	6	0.83	7.22	0.000258	0.0257
membrane lipid biosynthetic process (GO:0046467)	89	6	0.83	7.22	0.000258	0.0261
response to wounding (GO:0009611)	815	19	7.61	2.5	0.000305	0.029

## Sheet: Ath4
GO biological process complete	Ref list	Input genes	Expected	FE	P	adjusted P
cellulose biosynthetic process (GO:0030244)	58	10	0.98	10.17	1.84e-07	5.17e-05
unidimensional cell growth (GO:0009826)	362	22	6.14	3.58	6.26e-07	0.000147
response to light intensity (GO:0009642)	373	22	6.32	3.48	1e-06	0.000184
root morphogenesis (GO:0010015)	670	29	11.36	2.55	7.75e-06	0.00117
water transport (GO:0006833)	39	7	0.66	10.59	1.04e-05	0.0014
xyloglucan metabolic process (GO:0010411)	62	8	1.05	7.61	2.14e-05	0.00238
negative regulation of cytoskeleton organization (GO:0051494)	17	5	0.29	17.35	2.62e-05	0.00281
negative regulation of supramolecular fiber organization (GO:1902904)	17	5	0.29	17.35	2.62e-05	0.00286
plant-type cell wall biogenesis (GO:0009832)	270	16	4.58	3.5	2.82e-05	0.00297
cuticle development (GO:0042335)	34	6	0.58	10.41	4.93e-05	0.00447
regulation of hormone levels (GO:0010817)	305	16	5.17	3.09	0.000111	0.00846
fatty acid biosynthetic process (GO:0006633)	133	10	2.25	4.44	0.000149	0.011
hydrogen peroxide transmembrane transport (GO:0080170)	6	3	0.1	29.49	0.000359	0.023
cytokinin-activated signaling pathway (GO:0009736)	72	7	1.22	5.74	0.000353	0.0231
cortical microtubule organization (GO:0043622)	51	6	0.86	6.94	0.000367	0.0232
one-carbon compound transport (GO:0019755)	7	3	0.12	25.28	0.000506	0.0298
organic hydroxy compound metabolic process (GO:1901615)	389	17	6.59	2.58	0.000527	0.0301
plant-type cell wall cellulose metabolic process (GO:0052541)	19	4	0.32	12.42	0.000525	0.0306
response to nitrate (GO:0010167)	36	5	0.61	8.19	0.000576	0.0314
translational elongation (GO:0006414)	36	5	0.61	8.19	0.000576	0.0317
sulfur compound biosynthetic process (GO:0044272)	160	10	2.71	3.69	0.000597	0.0322
negative regulation of growth (GO:0045926)	37	5	0.63	7.97	0.000645	0.0345
pectin biosynthetic process (GO:0045489)	59	6	1	6	0.000748	0.0389
steroid biosynthetic process (GO:0006694)	61	6	1.03	5.8	0.000878	0.0446
multidimensional cell growth (GO:0009825)	41	5	0.7	7.19	0.000984	0.0491
plant epidermis development (GO:0090558)	639	23	10.83	2.12	0.000993	0.0491
very long-chain fatty acid metabolic process (GO:0000038)	41	5	0.7	7.19	0.000984	0.0495

## Sheet: Ath5
GO biological process complete	Ref list	Input genes	Expected	FE	P	adjusted P
microtubule-based movement (GO:0007018)	60	11	1.19	9.21	1.26e-07	4.12e-05
cytokinesis by cell plate formation (GO:0000911)	70	11	1.39	7.89	5e-07	0.000123
anthocyanin-containing compound biosynthetic process (GO:0009718)	26	7	0.52	13.53	2.86e-06	0.000467
mitotic cell cycle phase transition (GO:0044772)	52	9	1.04	8.7	2.71e-06	0.000469
regulation of cyclin-dependent protein serine/threonine kinase activity (GO:0000079)	54	8	1.07	7.44	2.68e-05	0.00315
meiotic cell cycle process (GO:1903046)	288	18	5.73	3.14	3.74e-05	0.00415
glucosinolate biosynthetic process (GO:0019761)	42	7	0.84	8.37	4.38e-05	0.00461
mitotic cytokinesis (GO:0000281)	42	7	0.84	8.37	4.38e-05	0.00478
starch metabolic process (GO:0005982)	64	8	1.27	6.28	8e-05	0.00772
regulation of flavonoid biosynthetic process (GO:0009962)	32	6	0.64	9.42	8.73e-05	0.00816
sucrose transport (GO:0015770)	20	5	0.4	12.56	0.000107	0.00939
positive regulation of protein kinase activity (GO:0045860)	12	4	0.24	16.75	0.000217	0.0161
monocarboxylic acid biosynthetic process (GO:0072330)	252	15	5.02	2.99	0.000268	0.0194
negative regulation of DNA-templated transcription initiation (GO:2000143)	5	3	0.1	30.14	0.000385	0.0263
regulation of secondary metabolic process (GO:0043455)	84	8	1.67	4.78	0.000443	0.028
mitotic spindle assembly (GO:0090307)	15	4	0.3	13.4	0.000441	0.0285
detoxification (GO:0098754)	157	11	3.13	3.52	0.000487	0.0292
regulation of microtubule cytoskeleton organization (GO:0070507)	29	5	0.58	8.66	0.000485	0.0294
meristem development (GO:0048507)	459	21	9.14	2.3	0.000627	0.0355
response to insect (GO:0009625)	33	5	0.66	7.61	0.00082	0.0455
small molecule catabolic process (GO:0044282)	254	14	5.06	2.77	0.000866	0.0472
regulation of cell cycle process (GO:0010564)	144	10	2.87	3.49	0.000925	0.0499

## Sheet: Ath6
GO biological process complete	Ref list	Input genes	Expected	FE	P	adjusted P
cellular response to iron ion starvation (GO:0010106)	8	5	0.03	100	1.66e-09	9.76e-06
positive regulation of iron ion transport (GO:0034758)	2	2	0.01	100	0.000109	0.0336
plant-type cell wall biogenesis (GO:0009832)	270	7	1.16	6.03	0.000196	0.0428
