# Supplementary material for: Transcriptome-derived networks reconstruct distinct immune strategies under different iron availability between Arabidopsis and rice
Source: Research Square preprint supplement (doi:10.21203/rs.3.rs-3214423/v1), 2024-07-15
Supplement: Supplementary file 14 [file e06b6f9225b50183589d2d5c.xlsx]

## Sheet: Supplementary Data 15
Name	Sequence 5' - 3'	Use
Ch_ITS2-qPCR-F	AAAGGTAGTGGCGGACCCTC	Determination of Colletotrichum higginsianum biomass
Ch_ITS2-qPCR-R	GGCAAGAGTCCCTCCGGAT	Determination of Colletotrichum higginsianum biomass
FER1-qPCR-F	GAGAACAATGATCCCCAGTT	Determination of Arabidopsis FER1 transcript levels
FER1-qPCR-R	TGATTGCTTCAATCTGCTCT	Determination of Arabidopsis FER1 transcript levels
PR1-qPCR-F	GATGTGCCAAAGTGAGGTGTAA	Determination of Arabidopsis PR1 transcript levels
PR1-qPCR-R	GGCTTCTCGTTCACATAATTCC	Determination of Arabidopsis PR1 transcript levels
ACT2-qPCR-F	CTTGCACCAAGCAGCATGAA	Arabidospsis thaliana housekeeping
ACT2-qPCR-R	CCGATCCAGACACTGTACTTCCTT	Arabidospsis thaliana housekeeping
Mo28S-qPCR-F	TACGAGAGGAACCGCTCATTCAGATAATTA	Determination of Magnaporthe oryzae biomass
Mo28S-qPCR-R	TCAGCAGATCGTAACGATAAAGCTACTC	Determination of Magnaporthe oryzae biomass
OsPBZ1-qPCR-F	GCGTTTGAGTCCGTGAGAGT	Determination of Oryza sativa PBZ1 transcript levels
OsPBZ1-qPCR-R	GCAGAACACATTCAGACTTGCC	Determination of Oryza sativa PBZ1 transcript levels
OsUBQ1-qPCR-F	TTCCCCAATGGAGCTATGGTT	Oryza sativa housekeeping
OsUBQ1-qPCR-R	AAACGGGACACGACCAAGG	Oryza sativa housekeeping
