# Supplementary material for: Transcriptome-derived networks reconstruct distinct immune strategies under different iron availability between Arabidopsis and rice
Source: Research Square preprint supplement (doi:10.21203/rs.3.rs-3214423/v1), 2024-07-15
Supplement: Supplementary file 15 [file ecd26dc42ebe07aee022da11.xlsx]

## Sheet: Supplementary Table 4
AthNet						OsNet
Gene ID	Degree	Community	Description	Short name		Gene ID	Degree	Community	Description	Short name	Arabidopsis ortholog
AT3G15010	44	1	UBP1-associated protein 2C	UBA2C		Os01g0826400	37	1	WRKY transcription factor WRKY24	WRKY24	AT2G38470
AT2G42810	36	1	Serine/threonine-protein phosphatase 5	PAPP5		Os02g0126400	43	1	Calcium-dependent protein kinase 4	CPK4	AT4G04695
AT3G48560	30	1	Acetolactate synthase, chloroplastic	ALS		Os02g0165100	37	1	Os02g0165100 protein	Os02g0165100	AT1G56140
AT3G55620	25	1	Eukaryotic translation initiation factor 6-2	EIF6-2		Os04g0688100	44	1	Peroxidase	Os04g0688100	AT2G37130
AT1G10960	24	1	Ferredoxin-1, chloroplastic	FD1		Os08g0202300	38	1	Os08g0202300 protein	Os08g0202300	#N/A
AT4G18205	57	2	Probable purine permease 22	PUP22		Os11g0115400	198	2	Non-specific lipid-transfer protein	Os11g0115400	AT2G38540
AT5G11670	50	2	NADP-dependent malic enzyme 2	NADP-ME2		Os11g0195600	209	2	Amino acid carrier, putative, expressed	LOC_Os11g09020	AT1G58360
AT5G57220	50	2	Cytochrome P450 81F2	CYP81F2		Os11g0485500	191	2	Expressed protein	LOC_Os11g29500	#N/A
AT1G18570	47	2	Transcription factor MYB51	MYB51		Os03g0785100	191	2	Os03g0785100 protein (Fragment)	Os03g0785100	#N/A
AT2G30870	46	2	Glutathione S-transferase F10	GSTF10		Os03g0808300	222	2	Os03g0808300 protein	LOC_Os03g59360	AT2G41870
AT2G41100	46	2	Calmodulin-like protein 12	CML12		Os01g0194600	40	3	Monothiol glutaredoxin-S2	GRXS2	AT3G21460
AT3G27090	46	2	AT3g27090/MOJ10_18	At3g27090		Os01g0303000	42	3	Os01g0303000 protein	P0035H10.18	AT1G76560
AT5G18470	46	2	Curculin-like (Mannose-binding) lectin family protein	At5g18470		Os01g0826000	48	3	Os01g0826000 protein	Os01g0826000	AT5G27690
AT2G34357	198	3	ARM repeat superfamily protein	At2g34357		Os09g0460400	40	3	Os09g0460400 protein	Os09g0460400	AT1G49650
AT5G22650	186	3				Os09g0535900	50	3	Os09g0535900 protein	Os09g0535900	AT4G34920
AT1G29940	177	3	DNA-directed RNA polymerase I subunit 2	NRPA2		Os02g0698000	253	4	Phosphoribulokinase	Os02g0698000	AT1G32060
AT5G27120	176	3	Probable nucleolar protein 5-1	NOP5-1		Os03g0184050	264	4			#N/A
AT1G56110	174	3	At1g56110/T6H22_9	NOP56		Os05g0477900	260	4	Non-specific lipid-transfer protein (Fragment)	Os05g0477900	AT2G38540
AT3G59670	174	3	Elongation factor	At3g59670		Os06g0574100	246	4	Os06g0574100 protein (Fragment)	Os06g0574100	AT4G33110
AT5G17460	15	4	Glutamyl-tRNA (Gln) amidotransferase subunit C	At5g17460		Os07g0170016	252	4	Os07g0170016 protein (Fragment)	Os07g0170016	#N/A
AT2G33380	13	4	Probable peroxygenase 3	PXG3		Os10g0170200	79	5	40S ribosomal protein S20, putative, expressed	LOC_Os10g08930	AT3G45030
AT2G41190	13	4	Amino acid transporter AVT1A	AVT1A		Os02g0821200	88	5	Os02g0821200 protein (Fragment)	Os02g0821200	AT4G29410
AT3G27250	11	4	At3g27250	At3g27250		Os03g0343500	80	5	60S ribosomal protein L22-2, putative, expressed	bip108	AT1G02830
AT3G29575	11	4	Ninja-family protein AFP3	AFP3		Os03g0424800	80	5	40S ribosomal protein S19	RPS19B	AT3G02080
AT4G18030	32	5	Probable methyltransferase PMT14	At4g18030		Os05g0459900	82	5	60S ribosomal protein L36	Os05g0459900	AT2G37600
AT1G78040	28	5	2,3-bisphosphoglycerate-dependent phosphoglycerate mutase 2	gpmA2		Os12g0555000	11	6	Os12g0555000 protein	RSOsPR10	#N/A
AT5G52060	26	5	BAG family molecular chaperone regulator 1	BAG1		Os02g0570400	14	6	Ent-cassa-12,15-diene synthase	KSL7	AT1G79460
AT1G04430	22	5	Probable methyltransferase PMT8	At1g04430		Os04g0178300	14	6	Syn-copalyl diphosphate synthase, chloroplastic	CPS4	AT1G79460
AT1G53730	19	5	Protein STRUBBELIG-RECEPTOR FAMILY 6	SRF6		Os06g0569500	13	6	Ent-sandaracopimaradiene 3-hydroxylase	CYP701A8	AT1G01190
AT4G20260	19	5	Plasma membrane-associated cation-binding protein 1	PCAP1		Os07g0663700	11	6	Os07g0663700 protein (Fragment)	Os07g0663700	AT2G47130
AT5G05170	19	5	Cellulose synthase A catalytic subunit 3 [UDP-forming]	CESA3		Os02g0194700	9	7	Lipoxygenase	Os02g0194700	AT3G45140
AT3G26510	15	6	Octicosapeptide/Phox/Bem1p family protein	At3g26510		Os02g0475400	11	7	Probable sodium/metabolite cotransporter BASS3, chloroplastic	BASS3	AT2G26900
AT2G45170	13	6	Autophagy-related protein 8e	ATG8E		Os04g0691900	8	7	1-phosphatidylinositol-3-phosphate 5-kinase	Os04g0691900	AT1G34260
AT1G80440	12	6	F-box/kelch-repeat protein At1g80440	At1g80440		Os07g0628700	9	7	Os07g0628700 protein	Os07g0628700	AT3G22060
AT1G68840	11	6	AP2/ERF and B3 domain-containing transcription repressor RAV2	RAV2		Os07g0628900	8	7	Os07g0628900 protein	Os07g0628900	AT3G22060
AT2G40000	11	6	Nematode resistance protein-like HSPRO2	HSPRO2		Os01g0279100	4	8	Magnesium-protoporphyrin IX monomethyl ester [oxidative] cyclase	ZIP1	AT3G56940
AT5G61600	11	6	Ethylene-responsive transcription factor ERF104	ERF104		Os11g0543500	4	8	Expressed protein	LOC_Os11g34110	AT5G27730
AT1G32900	25	7	Granule-bound starch synthase 1, chloroplastic/amyloplastic	GBSS1		Os02g0744900	5	8	Geranylgeranyl diphosphate reductase, chloroplastic	CHLP	AT1G74470
AT2G21330	19	7	Fructose-bisphosphate aldolase 1, chloroplastic	FBA1		Os03g0129300	7	8	Glyceraldehyde-3-phosphate dehydrogenase	OJ1528D07.7	AT1G12900
AT3G25585	17	7	Choline/ethanolaminephosphotransferase 2	AAPT2		Os12g0420200	4	8	Os12g0420200 protein	LOC_Os12g23180	AT3G63140
AT1G78510	16	7	Solanesyl diphosphate synthase 1, chloroplastic	SPS1		Os03g0844900	4	8	Os03g0844900 protein	LOC_Os03g62780	AT3G23700
AT5G23370	16	7	Putative GEM-like protein 8	At5g23370		Os04g0403500	6	8	Os04g0403500 protein	Os04g0403500	AT1G32220
AT1G07610	33	8				Os09g0530000	4	8	Os09g0530000 protein	Os09g0530000	AT4G27700
AT4G25310	30	8	2-oxoglutarate (2OG) and Fe(II)-dependent oxygenase superfamily protein	At4g25310		Os11g0181200	8	9	Os11g0181200 protein	Os11g0181200	#N/A
AT3G04570	29	8	AT-hook motif nuclear-localized protein 19	AHL19		Os03g0723400	7	9	Expressed protein	LOC_Os03g51350	AT5G66780
AT1G08090	28	8	High-affinity nitrate transporter 2.1	NRT2.1		Os05g0468800	7	9	Os05g0468800 protein	Os05g0468800	AT5G01300
AT1G18100	28	8	Protein MOTHER of FT and TFL1	MFT		Os06g0698300	7	9	Probable protein phosphatase 2C 59	Os06g0698300	AT1G07160
AT2G14560	13	9	Protein LURP1	LURP1		Os09g0109600	9	9	Os09g0109600 protein	Os09g0109600	#N/A
AT3G22235	12	9				Os09g0344500	8	9	Acetylserotonin O-methyltransferase 1	ASMT1	AT1G21100
AT2G46440	10	9	Cyclic nucleotide-gated ion channel 11	CNGC11		Os01g0127700	5	10	Os01g0127700 protein	Os01g0127700	AT1G65800
AT3G22231	10	9	Cysteine-rich and transmembrane domain-containing protein PCC1	PCC1		Os01g0864200	5	10	Os01g0864200 protein	Os01g0864200	#N/A
AT5G60900	9	9	G-type lectin S-receptor-like serine/threonine-protein kinase RLK1	RLK1		Os01g0864500	4	10	Os01g0864500 protein	NDR3	AT2G35460
AT5G54060	14	10	Anthocyanidin 3-O-glucoside 2'''-O-xylosyltransferase	A3G2XYLT		Os03g0331700	5	10	Probable calcium-binding protein CML27	CML27	AT5G37770
AT5G42800	13	10	Dihydroflavonol 4-reductase	DFRA		Os03g0787000	5	10	Os03g0787000 protein	LOC_Os03g57310	AT1G08560
AT4G22880	12	10	Leucoanthocyanidin dioxygenase	LDOX		Os01g0647200	6	12	Os01g0647200 protein	Os01g0647200	#N/A
AT1G03940	11	10	Coumaroyl-CoA:anthocyanidin 3-O-glucoside-6''-O-coumaroyltransferase 1	3AT1		Os01g0952800	7	12	Protein IRON-RELATED TRANSCRIPTION FACTOR 2	IRO2	AT2G41240
AT3G29590	11	10	Malonyl-CoA:anthocyanidin 5-O-glucoside-6''-O-malonyltransferase	5MAT		Os12g0236100	5	12	Os12g0236100 protein	Os12g0236100	AT2G42320
AT4G14090	11	10	UDP-glycosyltransferase 75C1	UGT75C1		Os12g0236200	5	12			#N/A
AT3G45140	7	12	Lipoxygenase 2, chloroplastic	LOX2		Os03g0439800	5	12	Os03g0439800 protein	Os03g0439800	AT1G23140
AT1G52040	5	12	Myrosinase-binding protein 1	MBP1		Os12g0236225	5	12	Os12g0236225 protein	Os12g0236225	#N/A
AT1G52410	5	12				Os09g0130300	5	12	Os09g0130300 protein (Fragment)	Os09g0130300	#N/A
AT2G43530	4	12	Defensin-like protein 194	ATTI3
AT3G25770	4	12	Allene oxide cyclase 2, chloroplastic	AOC2
AT5G60930	7	13	Kinesin-like protein KIN-4C	KIN4C
AT3G23890	6	13	DNA topoisomerase 2	TOP2
AT1G08560	4	13	Syntaxin-related protein KNOLLE	KN
AT1G18370	4	13	Kinesin-like protein KIN-7A	KIN7A
AT4G23800	3	13	High mobility group B protein 6	HMGB6
AT2G14247	12	16	Expressed protein	At2g14247
AT3G18290	12	16	Zinc finger protein BRUTUS	BTS
AT1G47395	11	16
AT1G47400	11	16	Uncharacterized protein	At1g47400
AT5G13740	11	16	Protein ZINC INDUCED FACILITATOR 1	ZIF1
AT1G16410	10	163	Dihomomethionine N-hydroxylase	CYP79F1
AT1G31230	9	163	Bifunctional aspartokinase/homoserine dehydrogenase 1, chloroplastic	AKHSDH1
AT3G19710	9	163	Methionine aminotransferase BCAT4	BCAT4
AT3G02020	8	163	Aspartokinase 3, chloroplastic	AK3
AT5G14200	8	163	3-isopropylmalate dehydrogenase 1, chloroplastic	IMDH1
